# Supplementary material for: The Y chromosome as a regulatory element shaping immune cell transcriptomes and susceptibility to autoimmune disease
Source: HighWire-hosted journal article supplement (doi:10.1101/gr.156703.113), 2013-06-25
Supplement: Supplemental_Tables.zip [file Table S1_AnimalNumbers.docx]

**Table S1.** Number of mice used in Fig. 1A and Fig. 1B. A heterogeneity test was used between cohorts of mice with no significant differences detected allowing data to be pooled from 3 independent experiments

| Strain | Number |
| --- | --- |
| B6 | 47 |
| B6-ChrYA/J | 14 |
| B6-ChrYMET | 25 |
| B6-ChrYPWD | 13 |
| B6-ChrYST | 15 |
| B6-ChrYWSB | 28 |
| B6-ChrYSJL | 12 |
| B6-ChrYLEWES | 38 |
| B6-ChrYRF | 22 |
| B6-ChrYMA | 17 |
| B6-ChrY129 | 21 |
