# Supplementary material for: The Y chromosome as a regulatory element shaping immune cell transcriptomes and susceptibility to autoimmune disease
Source: HighWire-hosted journal article supplement (doi:10.1101/gr.156703.113), 2013-06-25
Supplement: Supplemental_Tables.zip [file Table S3_B6_AltSpliceGOTerms.xlsx]

## Sheet: Workbook4.txt
Table S3. GO term analysis on alternatively spliced transcripts (FDR<0.05) from B6-ChrY^SJL vs. B6 dataset. Terms with P<1.0E-3 are shown.
GOID	GO_term	Frequency	Genome frequency	P-value	Corrected P-value	Gene(s) Directly Annotated GOID list
GO:0044237	cellular metabolic proces	0.49313 ( 1652 of 3350 genes )	0.22384 ( 7613 of 34011 annotated genes )	2.189e-310	1.025e-306	Hrh1, Rpl32, Prkacb, Ubxn1, Paip1, Brd7, Ddx56, Bcl11b, Zfp386, Pbx4, St6gal2, Sugp1, Dnmt3a, Anp32a, Gad2, Rbmy1a1, Ezh1, Atf7ip, Atad1, Ambra1, Adrbk1, Nsmce2, Mapk6, Flna, Tspo, Rabgap1, Mthfd1l, Spcs2, 6430573F11Rik, Bcl2, Araf, Nufip1, Gpx3, Dusp7, Picalm, Smg1, Rbpj, Tmed10, Lancl2, Lif, Hmgn3, Arl4a, Ngly1, Snrpd3, Abcc2, Samsn1, Uimc1, Ncor2, Clgn, Akna, Brd8, Chuk, Poli, Rab21, Orc3, Scy…
GO:0008152	metabolic process	0.54418 ( 1823 of 3350 genes )	0.26565 ( 9035 of 34011 annotated genes )	4.054e-310	1.898e-306	Hrh1, Rpl32, Prkacb, Ubxn1, Paip1, Brd7, Ddx56, Bcl11b, Zfp386, Pbx4, St6gal2, Pld3, Sugp1, Dnmt3a, Anp32a, Gad2, Cndp1, Rbmy1a1, Ezh1, Atf7ip, Atad1, Ambra1, Adrbk1, Nsmce2, Mapk6, Flna, Tspo, Rabgap1, Mthfd1l, Spcs2, Adam7, Adamts9, 6430573F11Rik, Bcl2, Araf, Nufip1, Gpx3, Dusp7, Picalm, Smg1, Rbpj, Tmed10, Acss3, Lancl2, Lif, Hmgn3, Arl4a, Ngly1, Dpp10, Snrpd3, Reck, Abcc2, Samsn1, Uimc1, Ncor…
GO:0044238	primary metabolic process	0.48716 ( 1632 of 3350 genes )	0.22525 ( 7661 of 34011 annotated genes )	3.945e-294	1.846e-290	Hrh1, Rpl32, Prkacb, Ubxn1, Paip1, Brd7, Ddx56, Bcl11b, Zfp386, Pbx4, St6gal2, Pld3, Sugp1, Dnmt3a, Anp32a, Gad2, Cndp1, Rbmy1a1, Ezh1, Atf7ip, Atad1, Adrbk1, Nsmce2, Mapk6, Flna, Tspo, Rabgap1, Spcs2, Adam7, Adamts9, Bcl2, Araf, Nufip1, Gpx3, Dusp7, Picalm, Smg1, Rbpj, Lancl2, Lif, Hmgn3, Arl4a, Dpp10, Snrpd3, Abcc2, Samsn1, Uimc1, Ncor2, Clgn, Akna, Brd8, Chuk, Poli, 2010106G01Rik, Rab21, Orc3,…
GO:0044260	cellular macromolecule me	0.39284 ( 1316 of 3350 genes )	0.16512 ( 5616 of 34011 annotated genes )	1.731e-263	8.104e-260	Rpl32, Prkacb, Ubxn1, Paip1, Brd7, Ddx56, Bcl11b, Zfp386, Pbx4, St6gal2, Sugp1, Dnmt3a, Anp32a, Rbmy1a1, Ezh1, Atf7ip, Atad1, Adrbk1, Nsmce2, Mapk6, Flna, Spcs2, Bcl2, Araf, Nufip1, Dusp7, Picalm, Smg1, Rbpj, Tmed10, Lancl2, Lif, Hmgn3, Ngly1, Snrpd3, Samsn1, Uimc1, Ncor2, Clgn, Akna, Brd8, Chuk, Poli, Orc3, Scyl2, Ilk, Tnik, Prpf40a, Hsph1, Etf1, Zmpste24, Bat3, Pknox1, Brwd1, Nat15, Elp2, Pcmtd…
GO:0043170	macromolecule metabolic p	0.42269 ( 1416 of 3350 genes )	0.18900 ( 6428 of 34011 annotated genes )	3.143e-258	1.471e-254	Rpl32, Prkacb, Ubxn1, Paip1, Brd7, Ddx56, Bcl11b, Zfp386, Pbx4, St6gal2, Sugp1, Dnmt3a, Anp32a, Cndp1, Rbmy1a1, Ezh1, Atf7ip, Atad1, Adrbk1, Nsmce2, Mapk6, Flna, Spcs2, Adam7, Adamts9, Bcl2, Araf, Nufip1, Dusp7, Picalm, Smg1, Rbpj, Tmed10, Lancl2, Lif, Hmgn3, Ngly1, Dpp10, Snrpd3, Samsn1, Uimc1, Ncor2, Clgn, Akna, Brd8, Chuk, Poli, 2010106G01Rik, Orc3, Scyl2, Ilk, Tnik, Prpf40a, Hsph1, Etf1, C4bp…
GO:0034641	cellular nitrogen compoun	0.31015 ( 1039 of 3350 genes )	0.13631 ( 4636 of 34011 annotated genes )	2.864e-180	1.341e-176	Hrh1, Paip1, Brd7, Ddx56, Bcl11b, Zfp386, Pbx4, Sugp1, Dnmt3a, Anp32a, Gad2, Rbmy1a1, Ezh1, Atf7ip, Atad1, Nsmce2, Flna, Tspo, Rabgap1, Mthfd1l, Nufip1, Gpx3, Picalm, Smg1, Rbpj, Lancl2, Lif, Hmgn3, Arl4a, Snrpd3, Abcc2, Uimc1, Ncor2, Akna, Brd8, Poli, Rab21, Orc3, Ilk, Prpf40a, Etnk1, Etf1, Lsg1, Ctps2, Ndel1, Pknox1, Brwd1, Elp2, Gtf2f1, Supt5h, Ift172, Lig1, Dhx9, Atf5, Nt5c3l, Tuba1c, Dnmt1, …
GO:0006139	nucleobase, nucleoside, n	0.29433 ( 986 of 3350 genes )	0.12602 ( 4286 of 34011 annotated genes )	4.882e-178	2.285e-174	Rara, Paip1, Mapkapk2, Aff3, Brd7, Tcf20, Smc1a, Ddx56, Bcl11b, Zfp386, Pbx4, Sugp1, Dnmt3a, Anp32a, Sfswap, Rcor1, Rpl7, Rbmy1a1, Ezh1, Atf7ip, Bves, Atad1, Rnf20, Pde3b, Nsmce2, Mina, Flna, Cnbp, Rabgap1, Iars, Akt2, Zhx2, Tap1, Nlrc5, Rps28, 2410022L05Rik, Nufip1, Dido1, Ilf2, Picalm, Apitd1, Smg1, Rbpj, Lancl2, Ahsa1, Lif, Hmgn3, Gnl2, Arl4a, Snrpd3, Hes2, Abcc2, Uimc1, Rhot1, Rela, Pgm3, Nco…
GO:0006807	nitrogen compound metabol	0.31194 ( 1045 of 3350 genes )	0.13916 ( 4733 of 34011 annotated genes )	3.064e-176	1.434e-172	Hrh1, Paip1, Brd7, Ddx56, Bcl11b, Zfp386, Pbx4, Sugp1, Dnmt3a, Anp32a, Gad2, Rbmy1a1, Ezh1, Atf7ip, Atad1, Nsmce2, Flna, Tspo, Rabgap1, Mthfd1l, Nufip1, Gpx3, Picalm, Smg1, Rbpj, Lancl2, Lif, Hmgn3, Arl4a, Snrpd3, Abcc2, Uimc1, Ncor2, Akna, Brd8, Poli, Rab21, Orc3, Ilk, Prpf40a, Etnk1, Etf1, Lsg1, Ctps2, Ndel1, Pknox1, Brwd1, Elp2, Gtf2f1, Supt5h, Ift172, Lig1, Dhx9, Atf5, Nt5c3l, Tuba1c, Dnmt1, …
GO:0019538	protein metabolic process	0.24925 ( 835 of 3350 genes )	0.10229 ( 3479 of 34011 annotated genes )	1.28e-158	5.99e-155	Mylip, Rpl32, Prkacb, Ubxn1, Rara, Paip1, Mapkapk2, Brd7, St6gal2, Trpm6, Vrk1, Rcor1, Cndp1, Rpl7, Ezh1, Ttn, Usp24, Rnf20, Adrbk1, Mapk6, Tmprss15, Flna, Spcs2, Iars, Adam7, Akt2, Dusp11, Adamts9, Rps28, Ppp1cb, Nrbp1, Bcl2, Araf, Park7, Dusp7, Ubr5, Smg1, Itgb3, Lif, Dpp10, Ttll10, Ccdc88c, Samsn1, Setd1a, Uimc1, Tmem188, Rela, Clgn, Gsk3b, Brd8, Chuk, Cdc73, 2010106G01Rik, Scyl2, Ptpn22, Ilk,…
GO:0044267	cellular protein metaboli	0.22269 ( 746 of 3350 genes )	0.08527 ( 2900 of 34011 annotated genes )	9.604e-158	4.496e-154	Mylip, Rpl32, Prkacb, Ubxn1, Rara, Paip1, Mapkapk2, Brd7, St6gal2, Trpm6, Vrk1, Rcor1, Rpl7, Ezh1, Ttn, Usp24, Rnf20, Adrbk1, Mapk6, Spcs2, Iars, Akt2, Dusp11, Rps28, Ppp1cb, Nrbp1, Bcl2, Araf, Dusp7, Ubr5, Smg1, Itgb3, Lif, Ttll10, Ccdc88c, Samsn1, Setd1a, Uimc1, Tmem188, Clgn, Gsk3b, Brd8, Chuk, Cdc73, Scyl2, Ptpn22, Ilk, Tnik, Hsph1, Etf1, Arrb2, Hdac4, Cd81, Zmpste24, Bat3, Setd3, Polr2h, Nat…
GO:0010467	gene expression	0.25731 ( 862 of 3350 genes )	0.11032 ( 3752 of 34011 annotated genes )	1.35e-151	6.321e-148	Mylip, Rpl32, Rara, Paip1, Mapkapk2, Aff3, Brd7, Tcf20, Ddx56, Bcl11b, Zfp386, Pbx4, Sugp1, Dnmt3a, Anp32a, Sfswap, Rcor1, Rpl7, Rbmy1a1, Ezh1, Atf7ip, Rnf20, Mina, Flna, Cnbp, Spcs2, Iars, Akt2, Zhx2, Nlrc5, Rps28, 2410022L05Rik, Bcl2, Park7, Nufip1, Dido1, Ilf2, Picalm, Apitd1, Rbpj, Lancl2, Lif, Hmgn3, Snrpd3, Hes2, Dsg1a, Ccdc88c, Uimc1, Rela, Ncor2, Akna, Zeb1, Gsk3b, Brd8, Dkk3, Cdc73, Iws1…
GO:0065007	biological regulation	0.46149 ( 1546 of 3350 genes )	0.27182 ( 9245 of 34011 annotated genes )	3e-151	1.404e-147	Hrh1, Rims4, Prkacb, Cd247, Arhgef3, Ubxn1, Paip1, Brd7, Ccl21a, Bcl11b, Zfp386, Pbx4, Gpr133, Dnmt3a, Atox1, Anp32a, Gad2, Rbmy1a1, Ezh1, Atf7ip, Atad1, Ambra1, Adrbk1, Nsmce2, Mapk6, Gpr174, Flna, Tspo, Rabgap1, Ap2b1, Adamts9, Psd4, Bcl2, Araf, Nufip1, Dusp7, Picalm, Rbpj, Calm1, Lancl2, Lif, Grid2ip, Hmgn3, Arl4a, Pea15a, Vdac3, Stxbp3a, Reck, Abcc2, Samsn1, Uimc1, Ncor2, Akna, Brd8, Chuk, Al…
GO:0050789	regulation of biological	0.44179 ( 1480 of 3350 genes )	0.25965 ( 8831 of 34011 annotated genes )	7.703e-143	3.606e-139	Hrh1, Rims4, Prkacb, Cd247, Arhgef3, Ubxn1, Paip1, Brd7, Ccl21a, Bcl11b, Zfp386, Pbx4, Gpr133, Dnmt3a, Anp32a, Rbmy1a1, Ezh1, Atf7ip, Atad1, Ambra1, Adrbk1, Nsmce2, Mapk6, Gpr174, Flna, Tspo, Rabgap1, Adamts9, Psd4, Bcl2, Araf, Nufip1, Dusp7, Picalm, Rbpj, Calm1, Lancl2, Lif, Grid2ip, Hmgn3, Arl4a, Pea15a, Vdac3, Stxbp3a, Reck, Samsn1, Uimc1, Ncor2, Akna, Brd8, Chuk, Als2cl, 2010106G01Rik, Rab21,…
GO:0090304	nucleic acid metabolic pr	0.24060 ( 806 of 3350 genes )	0.10308 ( 3506 of 34011 annotated genes )	1.813e-140	8.486e-137	Rara, Paip1, Mapkapk2, Aff3, Brd7, Tcf20, Smc1a, Ddx56, Bcl11b, Zfp386, Pbx4, Sugp1, Dnmt3a, Anp32a, Sfswap, Rcor1, Rpl7, Rbmy1a1, Ezh1, Atf7ip, Rnf20, Nsmce2, Mina, Flna, Cnbp, Iars, Akt2, Zhx2, Nlrc5, Rps28, 2410022L05Rik, Nufip1, Dido1, Ilf2, Picalm, Apitd1, Smg1, Rbpj, Lancl2, Lif, Hmgn3, Snrpd3, Hes2, Uimc1, Rela, Ncor2, Akna, Zeb1, Gsk3b, Brd8, Dkk3, Cdc73, Poli, Iws1, Prdx3, Orc3, Ilk, Prp…
GO:0019222	regulation of metabolic p	0.28149 ( 943 of 3350 genes )	0.13337 ( 4536 of 34011 annotated genes )	2.384e-137	1.116e-133	Uaca, Mylip, Hrh1, Ubxn1, Rara, Paip1, Mapkapk2, Aff3, Brd7, Tcf20, Smc1a, Bcl11b, Zfp386, Pbx4, Dnmt3a, Gpi1, Anp32a, Sfswap, Rcor1, Rbmy1a1, Ezh1, Ttn, Atf7ip, Bves, Atad1, Rnf20, Pde3b, Mina, Flna, Cnbp, Tspo, Rabgap1, Akt2, Zhx2, Arhgdia, Nlrc5, Ppp1cb, 2410022L05Rik, Bcl2, Araf, Park7, Nufip1, Ilf2, Dusp7, Picalm, Rbpj, Lancl2, Itgb3, Ahsa1, Lif, Hmgn3, Hes2, Dock10, Reck, Dsg1a, Ccdc88c, Sa…
GO:0044249	cellular biosynthetic pro	0.26448 ( 886 of 3350 genes )	0.12202 ( 4150 of 34011 annotated genes )	4.769e-135	2.232e-131	Hrh1, Rpl32, Rara, Paip1, Aff3, Brd7, Tcf20, Smc1a, Bcl11b, Zfp386, Pbx4, St6gal2, Dnmt3a, Gpi1, Anp32a, Sfswap, Rcor1, Gad2, Rpl7, Ezh1, Atf7ip, Rnf20, Mina, Flna, Cnbp, Tspo, Mthfd1l, Iars, Akt2, Zhx2, Alox5, Nlrc5, Rps28, Ppp1cb, 2410022L05Rik, Bcl2, Nufip1, Dido1, Ilf2, Picalm, Apitd1, Rbpj, Lancl2, Lif, Hmgn3, Hes2, Inpp5d, Uimc1, Tmem188, Rela, Pgm3, Ncor2, Akna, Zeb1, Gsk3b, Brd8, Dkk3, Cd…
GO:0050794	regulation of cellular pr	0.41731 ( 1398 of 3350 genes )	0.24345 ( 8280 of 34011 annotated genes )	1.206e-134	5.647e-131	Hrh1, Rims4, Prkacb, Cd247, Arhgef3, Ubxn1, Paip1, Brd7, Bcl11b, Zfp386, Pbx4, Gpr133, Dnmt3a, Anp32a, Rbmy1a1, Ezh1, Atf7ip, Atad1, Ambra1, Adrbk1, Nsmce2, Mapk6, Gpr174, Flna, Tspo, Rabgap1, Adamts9, Psd4, Bcl2, Araf, Nufip1, Dusp7, Picalm, Rbpj, Calm1, Lancl2, Lif, Grid2ip, Hmgn3, Arl4a, Pea15a, Stxbp3a, Samsn1, Uimc1, Ncor2, Akna, Brd8, Chuk, Als2cl, Rab21, Scyl2, Ilk, Tnik, Prpf40a, Hsph1, N…
GO:0031323	regulation of cellular me	0.25313 ( 848 of 3350 genes )	0.11417 ( 3883 of 34011 annotated genes )	1.702e-134	7.969e-131	Mylip, Hrh1, Ubxn1, Rara, Paip1, Mapkapk2, Aff3, Brd7, Tcf20, Smc1a, Bcl11b, Zfp386, Pbx4, Dnmt3a, Anp32a, Sfswap, Rcor1, Rbmy1a1, Ezh1, Ttn, Atf7ip, Bves, Atad1, Rnf20, Mina, Flna, Cnbp, Tspo, Rabgap1, Akt2, Zhx2, Nlrc5, Ppp1cb, 2410022L05Rik, Bcl2, Araf, Nufip1, Ilf2, Dusp7, Picalm, Rbpj, Lancl2, Itgb3, Ahsa1, Lif, Hmgn3, Hes2, Ccdc88c, Samsn1, Inpp5d, Vac14, Uimc1, Tmem188, Rela, Ncor2, Akna, …
GO:0009058	biosynthetic process	0.26776 ( 897 of 3350 genes )	0.12543 ( 4266 of 34011 annotated genes )	1.18e-132	5.523e-129	Hrh1, Rpl32, Rara, Paip1, Aff3, Brd7, Tcf20, Smc1a, Bcl11b, Zfp386, Pbx4, St6gal2, Dnmt3a, Gpi1, Anp32a, Sfswap, Rcor1, Gad2, Rpl7, Ezh1, Atf7ip, Rnf20, Mina, Flna, Cnbp, Tspo, Mthfd1l, Iars, Akt2, Zhx2, Alox5, Nlrc5, Rps28, Ppp1cb, 2410022L05Rik, Bcl2, Nufip1, Dido1, Ilf2, Picalm, Apitd1, Rbpj, Lancl2, Itgb3, Lif, Hmgn3, Hes2, Inpp5d, Uimc1, Tmem188, Rela, Pgm3, Ncor2, Akna, Zeb1, Gsk3b, Brd8, D…
GO:0071840	cellular component organi	0.24328 ( 815 of 3350 genes )	0.10864 ( 3695 of 34011 annotated genes )	4.344e-131	2.033e-127	Rara, Brd7, Smc1a, Ddx56, Bcl11b, Dnmt3a, Vrk1, Rcor1, Rpl7, Ezh1, Ttn, Atf7ip, Dync1h1, Bves, Atad1, Rnf20, Adrbk1, Nsmce2, Mina, Flna, Akt2, Hjurp, Ap2b1, Rps28, 2410022L05Rik, Bcl2, Gpsm2, Park7, Nufip1, Gpx3, Picalm, Apitd1, Rbpj, Tmed10, Itgb3, Tmem48, Olfm1, Lif, Grid2ip, Hmgn3, Gnl2, Cdc42se1, Stxbp3a, Reck, Daam1, Ccdc88c, Setd1a, Uimc1, Clgn, Gsk3b, Brd8, 4922501C03Rik, Cdc73, Als2cl, Pr…
GO:0034645	cellular macromolecule bi	0.22746 ( 762 of 3350 genes )	0.09820 ( 3340 of 34011 annotated genes )	8.063e-130	3.774e-126	Rpl32, Rara, Paip1, Aff3, Brd7, Tcf20, Smc1a, Bcl11b, Zfp386, Pbx4, St6gal2, Dnmt3a, Anp32a, Sfswap, Rcor1, Rpl7, Ezh1, Atf7ip, Rnf20, Mina, Flna, Cnbp, Iars, Akt2, Zhx2, Nlrc5, Rps28, Ppp1cb, 2410022L05Rik, Bcl2, Nufip1, Dido1, Ilf2, Picalm, Apitd1, Rbpj, Lancl2, Lif, Hmgn3, Hes2, Uimc1, Rela, Ncor2, Akna, Zeb1, Gsk3b, Brd8, Dkk3, Cdc73, Poli, Iws1, Prdx3, Orc3, Ilk, Etf1, Arrb2, Hdac4, Rad21, S…
GO:0009059	macromolecule biosyntheti	0.23075 ( 773 of 3350 genes )	0.10073 ( 3426 of 34011 annotated genes )	4.124e-129	1.931e-125	Rpl32, Rara, Paip1, Aff3, Brd7, Tcf20, Smc1a, Bcl11b, Zfp386, Pbx4, St6gal2, Dnmt3a, Anp32a, Sfswap, Rcor1, Rpl7, Ezh1, Atf7ip, Rnf20, Mina, Flna, Cnbp, Iars, Akt2, Zhx2, Nlrc5, Rps28, Ppp1cb, 2410022L05Rik, Bcl2, Nufip1, Dido1, Ilf2, Picalm, Apitd1, Rbpj, Lancl2, Itgb3, Lif, Hmgn3, Hes2, Inpp5d, Uimc1, Rela, Ncor2, Akna, Zeb1, Gsk3b, Brd8, Dkk3, Cdc73, Poli, Iws1, Prdx3, Orc3, Ilk, Hsph1, Etf1, …
GO:0016070	RNA metabolic process	0.21731 ( 728 of 3350 genes )	0.09182 ( 3123 of 34011 annotated genes )	1.619e-128	7.578e-125	Rara, Paip1, Mapkapk2, Aff3, Brd7, Tcf20, Ddx56, Bcl11b, Zfp386, Pbx4, Sugp1, Dnmt3a, Anp32a, Sfswap, Rcor1, Rpl7, Rbmy1a1, Ezh1, Atf7ip, Rnf20, Mina, Flna, Cnbp, Iars, Akt2, Zhx2, Nlrc5, Rps28, 2410022L05Rik, Nufip1, Dido1, Ilf2, Picalm, Apitd1, Smg1, Rbpj, Lancl2, Lif, Hmgn3, Snrpd3, Hes2, Uimc1, Rela, Ncor2, Akna, Zeb1, Gsk3b, Brd8, Dkk3, Cdc73, Iws1, Prdx3, Ilk, Prpf40a, Etf1, Arrb2, Sart3, H…
GO:0080090	regulation of primary met	0.24507 ( 821 of 3350 genes )	0.11152 ( 3793 of 34011 annotated genes )	3.452e-127	1.616e-123	Mylip, Hrh1, Ubxn1, Rara, Paip1, Mapkapk2, Aff3, Brd7, Tcf20, Smc1a, Bcl11b, Zfp386, Pbx4, Dnmt3a, Anp32a, Sfswap, Rcor1, Rbmy1a1, Ezh1, Ttn, Atf7ip, Bves, Rnf20, Pde3b, Mina, Flna, Cnbp, Tspo, Rabgap1, Akt2, Zhx2, Nlrc5, Ppp1cb, 2410022L05Rik, Bcl2, Araf, Nufip1, Ilf2, Dusp7, Picalm, Rbpj, Lancl2, Itgb3, Ahsa1, Lif, Hmgn3, Hes2, Ccdc88c, Samsn1, Uimc1, Tmem188, Rela, Ncor2, Akna, Zeb1, Gsk3b, Br…
GO:0016043	cellular component organi	0.22985 ( 770 of 3350 genes )	0.10476 ( 3563 of 34011 annotated genes )	8.985e-118	4.206e-114	Rara, Brd7, Smc1a, Bcl11b, Dnmt3a, Vrk1, Rcor1, Ezh1, Ttn, Atf7ip, Dync1h1, Bves, Atad1, Rnf20, Adrbk1, Nsmce2, Flna, Akt2, Hjurp, Ap2b1, 2410022L05Rik, Bcl2, Gpsm2, Park7, Nufip1, Gpx3, Picalm, Apitd1, Rbpj, Tmed10, Itgb3, Tmem48, Olfm1, Lif, Grid2ip, Hmgn3, Cdc42se1, Stxbp3a, Reck, Daam1, Ccdc88c, Setd1a, Uimc1, Clgn, Gsk3b, Brd8, 4922501C03Rik, Cdc73, Als2cl, Prdx3, Scyl2, Ilk, Tnik, Prpf40a, …
GO:0071841	cellular component organi	0.19910 ( 667 of 3350 genes )	0.08456 ( 2876 of 34011 annotated genes )	2.07e-115	9.688e-112	Brd7, Smc1a, Ddx56, Bcl11b, Dnmt3a, Vrk1, Rcor1, Rpl7, Ezh1, Ttn, Atf7ip, Dync1h1, Rnf20, Nsmce2, Mina, Flna, Hjurp, Ap2b1, Rps28, 2410022L05Rik, Bcl2, Gpsm2, Park7, Nufip1, Picalm, Apitd1, Tmed10, Itgb3, Tmem48, Lif, Grid2ip, Hmgn3, Gnl2, Reck, Daam1, Ccdc88c, Setd1a, Uimc1, Gsk3b, Brd8, 4922501C03Rik, Cdc73, Als2cl, Prdx3, Ilk, Tnik, Prpf40a, Mrto4, Hsph1, Etf1, Mon2, Numb, Lsg1, Hdac4, Zmpste2…
GO:0060255	regulation of macromolecu	0.23552 ( 789 of 3350 genes )	0.11073 ( 3766 of 34011 annotated genes )	2.283e-113	1.069e-109	Mylip, Ubxn1, Rara, Paip1, Mapkapk2, Aff3, Brd7, Tcf20, Smc1a, Bcl11b, Zfp386, Pbx4, Dnmt3a, Anp32a, Sfswap, Rcor1, Rbmy1a1, Ezh1, Ttn, Atf7ip, Bves, Atad1, Rnf20, Mina, Flna, Cnbp, Akt2, Zhx2, Nlrc5, Ppp1cb, 2410022L05Rik, Bcl2, Araf, Park7, Nufip1, Ilf2, Dusp7, Picalm, Rbpj, Lancl2, Itgb3, Lif, Hmgn3, Hes2, Dsg1a, Ccdc88c, Samsn1, Inpp5d, Uimc1, Tmem188, Rela, Ncor2, Akna, Zeb1, Gsk3b, Brd8, Dk…
GO:0043412	macromolecule modificatio	0.16896 ( 566 of 3350 genes )	0.06795 ( 2311 of 34011 annotated genes )	9.984e-107	4.673e-103	Mylip, Prkacb, Ubxn1, Rara, Mapkapk2, Brd7, St6gal2, Trpm6, Dnmt3a, Vrk1, Rcor1, Ezh1, Ttn, Atf7ip, Rnf20, Adrbk1, Mapk6, Akt2, Dusp11, Ppp1cb, Nrbp1, Bcl2, Araf, Dusp7, Ubr5, Smg1, Itgb3, Lif, Ttll10, Ccdc88c, Samsn1, Setd1a, Uimc1, Tmem188, Gsk3b, Brd8, Chuk, Cdc73, Scyl2, Ptpn22, Ilk, Tnik, Etf1, Arrb2, Hdac4, Cd81, Bat3, Setd3, Polr2h, Nat15, Trim24, Pcmtd1, Os9, Pak2, Vegfa, P4ha1, Pik3r6, N…
GO:0006464	protein modification proc	0.16478 ( 552 of 3350 genes )	0.06563 ( 2232 of 34011 annotated genes )	1.025e-105	4.798e-102	Mylip, Prkacb, Ubxn1, Rara, Mapkapk2, Brd7, St6gal2, Trpm6, Vrk1, Rcor1, Ezh1, Ttn, Rnf20, Adrbk1, Mapk6, Akt2, Dusp11, Ppp1cb, Nrbp1, Araf, Bcl2, Dusp7, Ubr5, Smg1, Itgb3, Lif, Ttll10, Ccdc88c, Samsn1, Setd1a, Uimc1, Tmem188, Gsk3b, Brd8, Chuk, Cdc73, Scyl2, Ptpn22, Ilk, Tnik, Etf1, Arrb2, Hdac4, Cd81, Bat3, Setd3, Polr2h, Nat15, Trim24, Pcmtd1, Os9, Pak2, Vegfa, P4ha1, Pik3r6, Npr2, Herc3, Ywha…
GO:0051171	regulation of nitrogen co	0.19761 ( 662 of 3350 genes )	0.08847 ( 3009 of 34011 annotated genes )	4.36e-103	2.041e-99	Hrh1, Rara, Mapkapk2, Aff3, Brd7, Tcf20, Smc1a, Bcl11b, Zfp386, Pbx4, Dnmt3a, Anp32a, Sfswap, Rcor1, Rbmy1a1, Ezh1, Atf7ip, Bves, Rnf20, Mina, Flna, Cnbp, Tspo, Rabgap1, Akt2, Zhx2, Nlrc5, 2410022L05Rik, Nufip1, Ilf2, Picalm, Rbpj, Lancl2, Ahsa1, Lif, Hmgn3, Hes2, Uimc1, Rela, Ncor2, Akna, Zeb1, Gsk3b, Brd8, Dkk3, Cdc73, Prdx3, Ilk, Arrb2, Hdac4, Rad21, Ndel1, Setd3, Pknox1, Brwd1, Trim24, Elp2, …
GO:0048518	positive regulation of bi	0.20507 ( 687 of 3350 genes )	0.09382 ( 3191 of 34011 annotated genes )	1.026e-102	4.801e-99	Uaca, Mylip, Hrh1, Cd247, Rara, Paip1, Mapkapk2, Brd7, Tcf20, Ccl21a, Bcl11b, Pbx4, Rcor1, Atf7ip, Bves, Atad1, Rnf20, Ambra1, Adrbk1, Nsmce2, Flna, Cnbp, Tspo, Akt2, Adamts9, Tap1, Alox5, Nlrc5, Bcl2, Araf, Park7, Nufip1, Ilf2, Ubr5, Picalm, Rbpj, Lancl2, Itgb3, Lif, Hmgn3, Inpp5d, Vac14, Uimc1, Tmem188, Rela, Zeb1, Gsk3b, Chuk, Cdc73, Prdx3, BC004004, Scyl2, Ptpn22, Ilk, Hsph1, C4bp, Numb, Arrb…
GO:0019219	regulation of nucleobase,	0.19522 ( 654 of 3350 genes )	0.08753 ( 2977 of 34011 annotated genes )	2.123e-101	9.935e-98	Rara, Mapkapk2, Aff3, Brd7, Tcf20, Smc1a, Bcl11b, Zfp386, Pbx4, Dnmt3a, Anp32a, Sfswap, Rcor1, Rbmy1a1, Ezh1, Atf7ip, Bves, Rnf20, Mina, Flna, Cnbp, Rabgap1, Akt2, Zhx2, Nlrc5, 2410022L05Rik, Nufip1, Ilf2, Picalm, Rbpj, Lancl2, Ahsa1, Lif, Hmgn3, Hes2, Uimc1, Rela, Ncor2, Akna, Zeb1, Gsk3b, Brd8, Dkk3, Cdc73, Prdx3, Ilk, Arrb2, Hdac4, Rad21, Ndel1, Setd3, Pknox1, Brwd1, Trim24, Elp2, Gtf2f1, Vegf…
GO:0071842	cellular component organi	0.18567 ( 622 of 3350 genes )	0.08100 ( 2755 of 34011 annotated genes )	2.235e-101	1.046e-97	Brd7, Smc1a, Bcl11b, Dnmt3a, Vrk1, Rcor1, Ezh1, Ttn, Atf7ip, Dync1h1, Rnf20, Nsmce2, Flna, Hjurp, Ap2b1, 2410022L05Rik, Bcl2, Gpsm2, Park7, Nufip1, Picalm, Apitd1, Tmed10, Itgb3, Tmem48, Lif, Grid2ip, Hmgn3, Reck, Daam1, Ccdc88c, Setd1a, Uimc1, Gsk3b, Brd8, 4922501C03Rik, Cdc73, Als2cl, Prdx3, Ilk, Tnik, Prpf40a, Hsph1, Etf1, Mon2, Numb, Hdac4, Zmpste24, Rad21, Ndel1, Bat3, Setd3, Brwd1, Nat15, A…
GO:0006996	organelle organization	0.14299 ( 479 of 3350 genes )	0.05448 ( 1853 of 34011 annotated genes )	3.68e-98	1.723e-94	Ict1, Chek2, Vps54, Prkcb, Ets1, Brd7, Birc6, Smc1a, Pfn2, Mta1, Hsp90aa1, Dnmt3a, Vrk1, Rcor1, Mfn1, Ezh1, Ttn, Rnf20, Sipa1l1, Nsmce2, Ubr2, Smarcc2, Flna, Sgol1, Apc, Rad54l, Hjurp, Ap2b1, Pde2a, Nin, Hcfc1, Rtn4, 2410022L05Rik, Krt9, Bcl2, Gpsm2, Arl8b, Ubn1, Park7, Evl, Picalm, Apitd1, Ppp1r9b, Larp4, L3mbtl3, Epb4.1, Mtap7, Tmed10, Bcor, Rab8a, Tmem48, Hspa4, Grid2ip, Brpf3, Hmgn3, Paf1, Sa…
GO:0010468	regulation of gene expres	0.19373 ( 649 of 3350 genes )	0.08894 ( 3025 of 34011 annotated genes )	1.056e-95	4.943e-92	Mylip, Rara, Paip1, Mapkapk2, Aff3, Brd7, Tcf20, Bcl11b, Zfp386, Pbx4, Dnmt3a, Anp32a, Sfswap, Rcor1, Rbmy1a1, Ezh1, Atf7ip, Rnf20, Mina, Flna, Cnbp, Akt2, Zhx2, Nlrc5, 2410022L05Rik, Bcl2, Park7, Nufip1, Ilf2, Picalm, Rbpj, Lancl2, Lif, Hmgn3, Hes2, Dsg1a, Ccdc88c, Uimc1, Rela, Ncor2, Akna, Zeb1, Gsk3b, Brd8, Dkk3, Cdc73, Prdx3, Ilk, Arrb2, Hdac4, Rad21, Bat3, Setd3, Pknox1, Brwd1, Trim24, Elp2,…
GO:0051179	localization	0.22746 ( 762 of 3350 genes )	0.11543 ( 3926 of 34011 annotated genes )	1.96e-91	9.175e-88	Uaca, Hrh1, Rims4, Rara, Gm5134, Trpm6, Atox1, Cltb, Anp32a, Dync1h1, Bves, Atad1, Rnf20, Adrbk1, Pde3b, Npc2, Flna, Tspo, Copb1, Nup160, Akt2, Ap2b1, Tap1, Arhgdia, Tram1l1, Rps28, Nrbp1, Bcl2, Gpsm2, Park7, Trak1, Ubr5, Picalm, Slc35b3, Rbpj, Tmed10, Itgb3, Tmem48, Lif, Hmgn3, Cdc42se1, Pea15a, Kcnq2, Vdac3, Stxbp3a, Ergic3, Abcc2, Chrnd, Tmem188, Rhot1, Itga4, Slco6c1, Gsk3b, Chuk, Als2cl, Hdl…
GO:0009889	regulation of biosyntheti	0.18806 ( 630 of 3350 genes )	0.08718 ( 2965 of 34011 annotated genes )	1.017e-90	4.763e-87	Hrh1, Rara, Paip1, Aff3, Brd7, Tcf20, Smc1a, Bcl11b, Zfp386, Pbx4, Dnmt3a, Anp32a, Sfswap, Rcor1, Ezh1, Atf7ip, Rnf20, Mina, Flna, Cnbp, Tspo, Akt2, Zhx2, Nlrc5, Ppp1cb, 2410022L05Rik, Bcl2, Nufip1, Ilf2, Picalm, Rbpj, Lancl2, Itgb3, Lif, Hmgn3, Hes2, Inpp5d, Uimc1, Tmem188, Rela, Ncor2, Akna, Zeb1, Gsk3b, Brd8, Dkk3, Cdc73, Prdx3, Ilk, Hsph1, Arrb2, Hdac4, Rad21, Setd3, Pknox1, Brwd1, Trim24, El…
GO:0031326	regulation of cellular bi	0.18597 ( 623 of 3350 genes )	0.08609 ( 2928 of 34011 annotated genes )	7.126e-90	3.336e-86	Hrh1, Rara, Paip1, Aff3, Brd7, Tcf20, Smc1a, Bcl11b, Zfp386, Pbx4, Dnmt3a, Anp32a, Sfswap, Rcor1, Ezh1, Atf7ip, Rnf20, Mina, Flna, Cnbp, Tspo, Akt2, Zhx2, Nlrc5, Ppp1cb, 2410022L05Rik, Bcl2, Nufip1, Ilf2, Picalm, Rbpj, Lancl2, Lif, Hmgn3, Hes2, Inpp5d, Uimc1, Tmem188, Rela, Ncor2, Akna, Zeb1, Gsk3b, Brd8, Dkk3, Cdc73, Prdx3, Ilk, Arrb2, Hdac4, Rad21, Setd3, Pknox1, Brwd1, Trim24, Elp2, Gtf2f1, Ve…
GO:0010556	regulation of macromolecu	0.17910 ( 600 of 3350 genes )	0.08174 ( 2780 of 34011 annotated genes )	7.014e-89	3.283e-85	Rara, Paip1, Aff3, Brd7, Tcf20, Smc1a, Bcl11b, Zfp386, Pbx4, Dnmt3a, Anp32a, Sfswap, Rcor1, Ezh1, Atf7ip, Rnf20, Mina, Flna, Cnbp, Akt2, Zhx2, Nlrc5, Ppp1cb, 2410022L05Rik, Bcl2, Nufip1, Ilf2, Picalm, Rbpj, Lancl2, Itgb3, Lif, Hmgn3, Hes2, Inpp5d, Uimc1, Rela, Ncor2, Akna, Zeb1, Gsk3b, Brd8, Dkk3, Cdc73, Prdx3, Ilk, Hsph1, Arrb2, Hdac4, Rad21, Setd3, Pknox1, Brwd1, Trim24, Elp2, Gtf2f1, Vegfa, Su…
GO:2000112	regulation of cellular ma	0.17612 ( 590 of 3350 genes )	0.07971 ( 2711 of 34011 annotated genes )	8.566e-89	4.01e-85	Rara, Paip1, Aff3, Brd7, Tcf20, Smc1a, Bcl11b, Zfp386, Pbx4, Dnmt3a, Anp32a, Sfswap, Rcor1, Ezh1, Atf7ip, Rnf20, Mina, Flna, Cnbp, Akt2, Zhx2, Nlrc5, Ppp1cb, 2410022L05Rik, Bcl2, Nufip1, Ilf2, Picalm, Rbpj, Lancl2, Lif, Hmgn3, Hes2, Uimc1, Rela, Ncor2, Akna, Zeb1, Gsk3b, Brd8, Dkk3, Cdc73, Prdx3, Ilk, Arrb2, Hdac4, Rad21, Setd3, Pknox1, Brwd1, Trim24, Elp2, Gtf2f1, Vegfa, Supt5h, Naca, Ift172, Fo…
GO:0048519	negative regulation of bi	0.18358 ( 615 of 3350 genes )	0.08559 ( 2911 of 34011 annotated genes )	2.918e-87	1.366e-83	Uaca, Mylip, Hrh1, Prkacb, Ubxn1, Rara, Mapkapk2, Brd7, Smc1a, Bcl11b, Zfp386, Dnmt3a, Gpi1, Sfswap, Rcor1, Ezh1, Atf7ip, Atad1, Rnf20, Ambra1, Adrbk1, Pde3b, Mina, Flna, Tspo, Akt2, Zhx2, Tap1, Nlrc5, Bcl2, Araf, Park7, Picalm, Rbpj, Lancl2, Itgb3, Lif, Grid2ip, Cdc42se1, Pea15a, Stxbp3a, Hes2, Samsn1, Inpp5d, Uimc1, Rela, Ncor2, Zeb1, Gsk3b, Dkk3, Cdc73, Prdx3, Scyl2, Ptpn22, Ilk, Hsph1, Numb, …
GO:0051252	regulation of RNA metabol	0.16806 ( 563 of 3350 genes )	0.07533 ( 2562 of 34011 annotated genes )	4.371e-86	2.046e-82	Rara, Mapkapk2, Aff3, Brd7, Tcf20, Bcl11b, Zfp386, Pbx4, Dnmt3a, Anp32a, Sfswap, Rcor1, Rbmy1a1, Ezh1, Atf7ip, Rnf20, Mina, Flna, Cnbp, Akt2, Zhx2, Nlrc5, 2410022L05Rik, Nufip1, Ilf2, Picalm, Rbpj, Lancl2, Lif, Hmgn3, Hes2, Uimc1, Rela, Ncor2, Akna, Zeb1, Gsk3b, Brd8, Dkk3, Cdc73, Prdx3, Ilk, Arrb2, Hdac4, Rad21, Setd3, Pknox1, Brwd1, Trim24, Elp2, Gtf2f1, Vegfa, Supt5h, Naca, Ift172, Foxo4, Phf1…
GO:0048522	positive regulation of ce	0.18000 ( 603 of 3350 genes )	0.08441 ( 2871 of 34011 annotated genes )	2.592e-84	1.213e-80	Uaca, Hrh1, Rara, Paip1, Brd7, Tcf20, Bcl11b, Pbx4, Rcor1, Atf7ip, Bves, Atad1, Rnf20, Ambra1, Adrbk1, Nsmce2, Flna, Cnbp, Tspo, Akt2, Adamts9, Tap1, Nlrc5, Bcl2, Araf, Nufip1, Ilf2, Ubr5, Picalm, Rbpj, Lancl2, Itgb3, Lif, Hmgn3, Inpp5d, Vac14, Uimc1, Tmem188, Rela, Zeb1, Gsk3b, Chuk, Cdc73, Prdx3, BC004004, Scyl2, Ilk, Hsph1, Numb, Arrb2, Hdac4, Cd81, Ndel1, Casp9, Bat3, Setd3, Pknox1, Trim24, N…
GO:0032774	RNA biosynthetic process	0.16657 ( 558 of 3350 genes )	0.07550 ( 2568 of 34011 annotated genes )	2.721e-83	1.273e-79	Rara, Aff3, Brd7, Tcf20, Bcl11b, Zfp386, Pbx4, Dnmt3a, Anp32a, Sfswap, Rcor1, Ezh1, Atf7ip, Rnf20, Mina, Flna, Cnbp, Akt2, Zhx2, Nlrc5, 2410022L05Rik, Nufip1, Dido1, Ilf2, Picalm, Apitd1, Rbpj, Lancl2, Lif, Hmgn3, Hes2, Uimc1, Rela, Ncor2, Akna, Zeb1, Gsk3b, Brd8, Dkk3, Cdc73, Iws1, Prdx3, Ilk, Arrb2, Hdac4, Rad21, Setd3, Polr2h, Pknox1, Brwd1, Trim24, Xab2, Elp2, Gtf2f1, Vegfa, Supt5h, Naca, Ift…
GO:0048523	negative regulation of ce	0.16866 ( 565 of 3350 genes )	0.07706 ( 2621 of 34011 annotated genes )	4.984e-83	2.333e-79	Uaca, Prkacb, Ubxn1, Rara, Mapkapk2, Brd7, Smc1a, Bcl11b, Zfp386, Dnmt3a, Gpi1, Sfswap, Rcor1, Ezh1, Atf7ip, Atad1, Rnf20, Ambra1, Adrbk1, Pde3b, Mina, Tspo, Akt2, Zhx2, Nlrc5, Bcl2, Araf, Park7, Picalm, Rbpj, Lancl2, Itgb3, Lif, Grid2ip, Cdc42se1, Pea15a, Stxbp3a, Hes2, Samsn1, Inpp5d, Uimc1, Rela, Ncor2, Zeb1, Gsk3b, Dkk3, Cdc73, Prdx3, Scyl2, Ptpn22, Ilk, Hsph1, Numb, Arrb2, Hdac4, Atp2b1, Bat…
GO:0006351	transcription, DNA-depend	0.16597 ( 556 of 3350 genes )	0.07530 ( 2561 of 34011 annotated genes )	8.075e-83	3.78e-79	Rara, Aff3, Brd7, Tcf20, Bcl11b, Zfp386, Pbx4, Dnmt3a, Anp32a, Sfswap, Rcor1, Ezh1, Atf7ip, Rnf20, Mina, Flna, Cnbp, Akt2, Zhx2, Nlrc5, 2410022L05Rik, Nufip1, Dido1, Ilf2, Picalm, Apitd1, Rbpj, Lancl2, Lif, Hmgn3, Hes2, Uimc1, Rela, Ncor2, Akna, Zeb1, Gsk3b, Brd8, Dkk3, Cdc73, Iws1, Prdx3, Ilk, Arrb2, Hdac4, Rad21, Setd3, Polr2h, Pknox1, Brwd1, Trim24, Xab2, Elp2, Gtf2f1, Vegfa, Supt5h, Naca, Ift…
GO:0006355	regulation of transcripti	0.15910 ( 533 of 3350 genes )	0.07318 ( 2489 of 34011 annotated genes )	7.227e-77	3.383e-73	Rara, Aff3, Brd7, Tcf20, Bcl11b, Zfp386, Pbx4, Dnmt3a, Anp32a, Sfswap, Rcor1, Ezh1, Atf7ip, Rnf20, Mina, Flna, Cnbp, Akt2, Zhx2, Nlrc5, 2410022L05Rik, Nufip1, Ilf2, Picalm, Rbpj, Lancl2, Lif, Hmgn3, Hes2, Uimc1, Rela, Ncor2, Akna, Zeb1, Gsk3b, Brd8, Dkk3, Cdc73, Prdx3, Ilk, Arrb2, Hdac4, Rad21, Setd3, Pknox1, Brwd1, Trim24, Elp2, Gtf2f1, Vegfa, Supt5h, Naca, Ift172, Foxo4, Phf12, Atf5, Dnmt1, Zbt…
GO:0051234	establishment of localiza	0.18836 ( 631 of 3350 genes )	0.09470 ( 3221 of 34011 annotated genes )	1.305e-75	6.107e-72	Uaca, Hrh1, Rims4, Rara, Gm5134, Trpm6, Atox1, Cltb, Anp32a, Dync1h1, Bves, Atad1, Adrbk1, Pde3b, Npc2, Flna, Tspo, Copb1, Nup160, Akt2, Ap2b1, Tap1, Tram1l1, Rps28, Nrbp1, Bcl2, Gpsm2, Park7, Trak1, Ubr5, Picalm, Slc35b3, Rbpj, Tmed10, Itgb3, Tmem48, Lif, Hmgn3, Cdc42se1, Pea15a, Kcnq2, Vdac3, Stxbp3a, Ergic3, Abcc2, Chrnd, Rhot1, Slco6c1, Gsk3b, Chuk, Hdlbp, Rab21, Scyl2, Copa, Txnrd3, Nup210, …
GO:0006810	transport	0.18597 ( 623 of 3350 genes )	0.09306 ( 3165 of 34011 annotated genes )	2.087e-75	9.769e-72	Uaca, Hrh1, Rims4, Rara, Gm5134, Trpm6, Atox1, Cltb, Anp32a, Dync1h1, Bves, Atad1, Adrbk1, Pde3b, Npc2, Flna, Tspo, Copb1, Nup160, Akt2, Ap2b1, Tap1, Tram1l1, Rps28, Nrbp1, Bcl2, Park7, Trak1, Ubr5, Picalm, Slc35b3, Rbpj, Tmed10, Itgb3, Tmem48, Lif, Hmgn3, Cdc42se1, Pea15a, Kcnq2, Vdac3, Stxbp3a, Ergic3, Abcc2, Chrnd, Rhot1, Slco6c1, Gsk3b, Chuk, Hdlbp, Rab21, Scyl2, Copa, Txnrd3, Nup210, Mon2, L…
GO:0032502	developmental process	0.21493 ( 720 of 3350 genes )	0.11705 ( 3981 of 34011 annotated genes )	1.48e-71	6.929e-68	Mylip, Rara, Mapkapk2, Aff3, Smc1a, Ccl21a, Bcl11b, Dnmt3a, Rttn, Gpi1, Rcor1, Zfr, Ttn, Bves, Ambra1, Rnf17, Adrbk1, Pde3b, Nsmce2, Flna, Tspo, Duox1, Akt2, Zhx2, Adamts9, Psd4, Bcl2, Gpsm2, Picalm, Rbpj, Itgb3, Olfm1, Lif, Arl4a, Stxbp3a, Reck, Chrnd, Inpp5d, Rela, Pgm3, Ncor2, Itga4, Clgn, Zeb1, Gsk3b, Dkk3, Chuk, Cdc73, Prdx3, Ptpn22, Ilk, Tnik, Txnrd3, 4932438A13Rik, Numb, Arrb2, Hdac4, Ndel…
GO:0009056	catabolic process	0.11731 ( 393 of 3350 genes )	0.04828 ( 1642 of 34011 annotated genes )	1.764e-69	8.258e-66	Mylip, Chek2, Suclg1, Myo9b, Plcd1, Ubxn1, Smad7, Pld3, Gnb2l1, Hsp90aa1, Ube3a, Gpi1, Rbm8a, Gad2, Aco1, Mfn1, Atf7ip, Usp24, Bves, Atad1, Rnf20, Ambra1, Sipa1l1, Pde3b, Ubr2, Flna, Fbxl3, Pde1b, Apc, Rabgap1, Akt2, Gna13, Zhx2, Pde2a, Tap1, Stub1, Arhgap1, Ppp1cb, Ctrb1, Idh3g, Gsta1, Park7, Tbl1x, Gpx3, Dram1, Ubr5, Smg1, Tmed10, Ahsa1, Pabpc1, Gnl2, Gnai2, Arl4a, Ngly1, Rnf4, 1110018G07Rik, A…
GO:0044248	cellular catabolic proces	0.10358 ( 347 of 3350 genes )	0.04055 ( 1379 of 34011 annotated genes )	6.88e-67	3.221e-63	Mylip, Chek2, Suclg1, Myo9b, Ubxn1, Smad7, Gnb2l1, Hsp90aa1, Ube3a, Gpi1, Rbm8a, Gad2, Aco1, Mfn1, Atf7ip, Usp24, Bves, Atad1, Rnf20, Ambra1, Sipa1l1, Pde3b, Ubr2, Fbxl3, Pde1b, Rabgap1, Akt2, Gna13, Zhx2, Pde2a, Tap1, Stub1, Arhgap1, Ppp1cb, Idh3g, Gsta1, Park7, Tbl1x, Gpx3, Dram1, Ubr5, Smg1, Ahsa1, Pabpc1, Gnl2, Gnai2, Arl4a, Rnf4, 1110018G07Rik, Abcc2, Rad23b, Rhot1, Gsk3b, Arfgef1, Prdx3, Ra…
GO:0048583	regulation of response to	0.12328 ( 413 of 3350 genes )	0.05548 ( 1887 of 34011 annotated genes )	2.145e-61	1.004e-57	Uaca, Stat5b, Myo9b, Cd247, Arhgef3, Prkcb, Rara, Mapkapk2, Smad7, Ccl21a, Slc20a1, Ube3a, Ddit3, Ttn, Bmp5, Bves, Adrbk1, Sipa1l1, Ubr2, Il12rb1, Flna, Itk, Apc, Rps3, Rabgap1, Akt2, Pde2a, Tap1, Ubash3a, Hmgcr, Arhgap1, Psd4, Nlrc5, Rtn4, Bcl2, Gpsm2, Park7, Pycard, Dusp7, Ubr5, Strn3, Ppp1r9b, Rbpj, Asxl2, Lancl2, Itgb3, Ccl5, Ntrk3, Map4k2, Lif, Il20rb, Cdc42se1, Samsn1, Inpp5d, Uimc1, Tlr2, …
GO:0007275	multicellular organismal	0.19075 ( 639 of 3350 genes )	0.10479 ( 3564 of 34011 annotated genes )	4.115e-61	1.926e-57	Mylip, Rara, Mapkapk2, Aff3, Ccl21a, Bcl11b, Dnmt3a, Rttn, Gpi1, Rcor1, Zfr, Ttn, Bves, Ambra1, Rnf17, Adrbk1, Pde3b, Flna, Tspo, Duox1, Akt2, Zhx2, Psd4, Bcl2, Gpsm2, Picalm, Rbpj, Itgb3, Olfm1, Lif, Stxbp3a, Reck, Chrnd, Inpp5d, Rela, Pgm3, Ncor2, Itga4, Clgn, Zeb1, Gsk3b, Dkk3, Chuk, Cdc73, Prdx3, Ptpn22, Ilk, Tnik, Txnrd3, 4932438A13Rik, Numb, Arrb2, Hdac4, Ndel1, Bat3, Pknox1, Ggn, Xab2, Add…
GO:0006796	phosphate metabolic proce	0.11284 ( 378 of 3350 genes )	0.04987 ( 1696 of 34011 annotated genes )	4.113e-58	1.925e-54	Chek2, Cdk20, Prkacb, Uhmk1, Prkcb, Rara, Mapkapk2, Smad7, Dgkd, Rngtt, Mapk10, Gnb2l1, Trpm6, Vrk1, Ak2, Ttn, Bmp5, Dyrk4, Adrbk1, Csnk1g1, Mapk6, Il12rb1, Itk, Mdp1, Akap4, Apc, Sgk3, Akt2, Dusp11, Hmgcr, Nlrc5, Ppp1cb, Pdp2, Nrbp1, Araf, Bcl2, Mphosph10, Ubn1, Dusp7, 2610018G03Rik, Ppp1r9b, Mark3, Smg1, Itgb3, Ccl5, Ntrk3, Map4k2, Lif, Hspa4, Gnai2, Ccdc88c, Samsn1, Inpp5d, Vac14, Tmem188, Tlr…
GO:0006793	phosphorus metabolic proc	0.11284 ( 378 of 3350 genes )	0.04993 ( 1698 of 34011 annotated genes )	5.656e-58	2.647e-54	Chek2, Cdk20, Prkacb, Uhmk1, Prkcb, Rara, Mapkapk2, Smad7, Dgkd, Rngtt, Mapk10, Gnb2l1, Trpm6, Vrk1, Ak2, Ttn, Bmp5, Dyrk4, Adrbk1, Csnk1g1, Mapk6, Il12rb1, Itk, Mdp1, Akap4, Apc, Sgk3, Akt2, Dusp11, Hmgcr, Nlrc5, Ppp1cb, Pdp2, Nrbp1, Araf, Bcl2, Mphosph10, Ubn1, Dusp7, 2610018G03Rik, Ppp1r9b, Mark3, Smg1, Itgb3, Ccl5, Ntrk3, Map4k2, Lif, Hspa4, Gnai2, Ccdc88c, Samsn1, Inpp5d, Vac14, Tmem188, Tlr…
GO:0033036	macromolecule localizatio	0.10358 ( 347 of 3350 genes )	0.04475 ( 1522 of 34011 annotated genes )	1.15e-55	5.382e-52	Uaca, Stat5b, Sec22b, Vps54, Uhmk1, Ap3m1, Smad7, Vamp4, Gnb2l1, Hsp90aa1, Cltb, Npc2, Flna, Sgol1, Akap4, Vps26b, Copb1, Apc, Nup160, Akt2, Ap2b1, Pde2a, Tap1, Nin, Arhgdia, Tram1l1, Rps28, Bcl2, Pycard, Ubr5, Snx7, Picalm, Mtap7, Rbpj, Tmed10, Rab8a, Itgb3, Tmem48, Hspa4, Xpo7, Stxbp3a, Samm50, Hcn1, Abcc2, Tmem188, Tlr2, Tram2, Gsk3b, Erc1, Als2cl, Hdlbp, Rab21, Copa, Nup210, Mon2, 4932438A13R…
GO:0044085	cellular component biogen	0.09970 ( 334 of 3350 genes )	0.04243 ( 1443 of 34011 annotated genes )	3.957e-55	1.852e-51	Chek2, Smad7, Pfn2, Ddx56, Dgkd, Gnb2l1, Hsp90aa1, Nhp2, Rpl7, Ttn, Atf7ip, Dync1h1, Mina, Flna, Apc, Hjurp, Ap2b1, Stub1, Hmgcr, Rps28, Hcfc1, Lrrc50, Bcl2, Mphosph10, Nufip1, Gpx3, Evl, Picalm, Ppp1r9b, Lsm14a, Tmed10, Rab8a, Itgb3, Ccl5, Tmem48, Olfm1, Hspa4, Gnl2, Stxbp3a, Rnf4, Eif3d, Zrsr2, Ccdc88c, Terf1, Pum2, Igf1r, Clgn, Gsk3b, Ssh2, Ezr, Rps16, Arfgef1, Celf2, Ilk, Mrto4, Lsg1, Nop58, …
GO:0035556	intracellular signal tran	0.10836 ( 363 of 3350 genes )	0.04837 ( 1645 of 34011 annotated genes )	1.292e-54	6.05e-51	Uaca, Stat5b, Chek2, Prkacb, Myo9b, Arhgef3, Prkcb, Plcd1, Smad7, Smc1a, Slc20a1, Mapk10, Gnb2l1, Ube3a, Ttn, Bves, Sipa1l1, Ubr2, Mapk6, Flna, Itk, Apc, Rabgap1, Akt2, Gna13, Pde2a, Arhgdia, Hmgcr, Arhgap1, Psd4, Araf, Arl8b, Dusp7, Ppp1r9b, Rab8a, Itgb3, Ccl5, Map4k2, Lif, Gnai2, Cdc42se1, Arl4a, Pea15a, Inpp5d, Tlr2, Rhot1, Rela, Map4k4, Madd, Igf1r, Igbp1, Gsk3b, Erc1, Chuk, Als2cl, Arfgef1, …
GO:0051641	cellular localization	0.10328 ( 346 of 3350 genes )	0.04510 ( 1534 of 34011 annotated genes )	2.466e-54	1.154e-50	Uaca, Rims4, Sec22b, Vps54, Uhmk1, Prkcb, Plcd1, Ap3m1, Smad7, Vamp4, Pfn2, Gnb2l1, Hsp90aa1, Cltb, Anp32a, Adrbk1, Pde3b, Npc2, Flna, Sgol1, Vps26b, Copb1, Apc, Nup160, Akt2, Ap2b1, Pde2a, Tap1, Sdccag1, Nin, Hmgcr, Rps28, Rtn4, Nrbp1, Gpsm2, Pycard, Trak1, Ubr5, Picalm, Mtap7, Rbpj, Tmed10, Rab8a, Ccl5, Tmem48, Map4k2, Lif, Hspa4, Hmgn3, Xpo7, Stxbp3a, Samm50, Tmem188, Tlr2, Rhot1, Gsk3b, Erc1,…
GO:0050896	response to stimulus	0.30299 ( 1015 of 3350 genes )	0.20335 ( 6916 of 34011 annotated genes )	2.918e-54	1.366e-50	Uaca, Mylip, Hrh1, Prkacb, Cd247, Arhgef3, Rara, Mapkapk2, Aff3, Brd7, Smc1a, Ccl21a, Bcl11b, Gpr133, Trpm6, Tgtp1, Dnmt3a, Atox1, Rassf2, Ttn, Bves, Atad1, Ifi47, Adrbk1, Pde3b, Nsmce2, Mapk6, Gpr174, Flna, Tspo, Rabgap1, Duox1, Akt2, Tap1, Arhgdia, Alox5, Psd4, Nlrc5, Bcl2, Araf, Gpsm2, Park7, Ilf2, Gpx3, Dusp7, Ubr5, Apitd1, Smg1, Rbpj, Calm1, Lancl2, Itgb3, Ahsa1, Lif, Grid2ip, Hmgn3, Cdc42se…
GO:0007049	cell cycle	0.08388 ( 281 of 3350 genes )	0.03281 ( 1116 of 34011 annotated genes )	5.285e-54	2.474e-50	Stat5b, Chek2, Cdk20, Prkacb, Uhmk1, Rara, Mapkapk2, Ets1, Brd7, Birc6, Smc1a, Gnb2l1, Vrk1, Trp53bp2, Anp32b, Rassf2, Ddit3, Nsmce2, Ubr2, Mapk6, Flna, Sgol1, Apc, Rabgap1, Hjurp, Foxn3, Hcfc1, Ppp1cb, Bcl2, Gpsm2, Arl8b, Ccar1, Chtf18, Apitd1, Calm1, Lif, Paf1, Gnai2, Rnf4, Uimc1, Terf1, Madd, Psmd13, Clgn, Gsk3b, 4922501C03Rik, Smc3, Cdc73, BC004004, Ilk, Nek9, Son, Ing4, Rad21, Tgfb1, Foxk1, …
GO:0048856	anatomical structure deve	0.17851 ( 598 of 3350 genes )	0.10044 ( 3416 of 34011 annotated genes )	3.998e-53	1.871e-49	Mylip, Rara, Mapkapk2, Aff3, Smc1a, Ccl21a, Bcl11b, Gpi1, Rcor1, Ttn, Bves, Ambra1, Rnf17, Adrbk1, Pde3b, Flna, Tspo, Duox1, Akt2, Zhx2, Psd4, Bcl2, Gpsm2, Picalm, Rbpj, Itgb3, Lif, Stxbp3a, Reck, Chrnd, Inpp5d, Rela, Pgm3, Ncor2, Itga4, Zeb1, Gsk3b, Chuk, Cdc73, Prdx3, Ptpn22, Ilk, Tnik, 4932438A13Rik, Numb, Arrb2, Hdac4, Ndel1, Bat3, Setd3, Pknox1, Xab2, Add1, Vegfa, Ift172, Foxo4, Utrn, Atf5, …
GO:0008219	cell death	0.09970 ( 334 of 3350 genes )	0.04399 ( 1496 of 34011 annotated genes )	2.411e-51	1.128e-47	Uaca, Stat5b, Chek2, Prkcb, Rara, Ets1, Birc6, Bcl11b, Krit1, Gnb2l1, Trp53bp2, Gpi1, Ddit3, Ambra1, Tspo, Apc, Rps3, Sgk3, Akt2, Ndor1, Tap1, Hmgcr, Rtn4, Ctrb1, Bcl2, Araf, Park7, Ccar1, Pycard, Dido1, Dram1, 2610018G03Rik, Itgb3, Ccl5, Ntrk3, Hspa4, Ghitm, Pea15a, Ifnb1, Inpp5d, Vac14, Terf1, Rhot1, Rela, Madd, Igf1r, Igbp1, Gsk3b, Prdx3, Ilk, Pdcd4, Hsph1, Son, Ing4, Arrb2, Tmbim4, Rad21, Tgf…
GO:0016265	death	0.10000 ( 335 of 3350 genes )	0.04422 ( 1504 of 34011 annotated genes )	2.936e-51	1.374e-47	Uaca, Stat5b, Chek2, Prkcb, Rara, Ets1, Birc6, Bcl11b, Krit1, Gnb2l1, Trp53bp2, Gpi1, Ddit3, Ambra1, Tspo, Apc, Rps3, Sgk3, Akt2, Ndor1, Tap1, Hmgcr, Rtn4, Ctrb1, Bcl2, Araf, Park7, Ccar1, Pycard, Dido1, Dram1, 2610018G03Rik, Itgb3, Ccl5, Ntrk3, Hspa4, Ghitm, Pea15a, Ifnb1, Inpp5d, Vac14, Terf1, Rhot1, Rela, Madd, Igf1r, Igbp1, Gsk3b, Prdx3, Ilk, Pdcd4, Hsph1, Son, Ing4, Arrb2, Tmbim4, Rad21, Tgf…
GO:0008104	protein localization	0.09134 ( 306 of 3350 genes )	0.03893 ( 1324 of 34011 annotated genes )	2.813e-50	1.317e-46	Uaca, Sec22b, Vps54, Uhmk1, Ap3m1, Smad7, Vamp4, Gnb2l1, Hsp90aa1, Cltb, Flna, Sgol1, Akap4, Vps26b, Copb1, Apc, Nup160, Akt2, Ap2b1, Pde2a, Tap1, Nin, Arhgdia, Tram1l1, Bcl2, Pycard, Ubr5, Snx7, Picalm, Mtap7, Rbpj, Tmed10, Rab8a, Tmem48, Hspa4, Xpo7, Stxbp3a, Samm50, Hcn1, Tmem188, Tlr2, Tram2, Gsk3b, Erc1, Als2cl, Rab21, Copa, Nup210, Mon2, Lsg1, Arrb2, Cd81, Rad21, Nop58, Apob, Tgfb1, Bat3, R…
GO:0023051	regulation of signaling	0.10866 ( 364 of 3350 genes )	0.05069 ( 1724 of 34011 annotated genes )	6.436e-50	3.013e-46	Rims4, Myo9b, Arhgef3, Prkcb, Rara, Smad7, Pfn2, Slc20a1, Ube3a, Ddit3, Ttn, Bmp5, Bves, Atad1, Cacna2d2, Adrbk1, Sipa1l1, Pde3b, Ubr2, Flna, Apc, Rabgap1, Akt2, Ubash3a, Hmgcr, Arhgap1, Psd4, Nlrc5, Rtn4, Gpsm2, Park7, Dusp7, Ubr5, Strn3, Ppp1r9b, Rbpj, Asxl2, Rab8a, Lancl2, Itgb3, Ccl5, Map4k2, Lif, Grid2ip, Hmgn3, Gnai2, Cdc42se1, Inpp5d, Tlr2, Rela, Map4k4, Madd, Igf1r, Zeb1, Igbp1, Gsk3b, Dk…
GO:0065008	regulation of biological	0.13104 ( 439 of 3350 genes )	0.06668 ( 2268 of 34011 annotated genes )	1.077e-49	5.041e-46	Usf2, Stat5b, Mylip, Hrh1, Rims4, Vps54, Prkcb, Plcd1, Rara, Ets1, Smad7, Pfn2, Krit1, Gnb2l1, Hsp90aa1, Atox1, Txnl1, Rcor1, Gad2, Aco1, Ddit3, Bmp5, Bves, Adrbk1, Sipa1l1, Pde3b, Nsmce2, Npc2, Flna, Tspo, Cdc42ep3, Sgol1, Pde1b, Apc, Akt2, Gna13, Ap2b1, Pde2a, Tap1, Stub1, Nin, Hmgcr, Alox5, Hcfc1, Rtn4, Bcl2, Park7, Evl, Ppp1r9b, Epb4.1, Mtap7, Rab8a, Itgb3, Ccl5, Ntrk3, Lif, Grid2ip, Hmgn3, I…
GO:0009966	regulation of signal tran	0.09731 ( 326 of 3350 genes )	0.04313 ( 1467 of 34011 annotated genes )	1.28e-49	5.993e-46	Myo9b, Arhgef3, Prkcb, Smad7, Slc20a1, Ube3a, Ddit3, Ttn, Bmp5, Bves, Adrbk1, Sipa1l1, Ubr2, Flna, Apc, Rabgap1, Akt2, Ubash3a, Hmgcr, Arhgap1, Psd4, Nlrc5, Gpsm2, Park7, Dusp7, Ubr5, Strn3, Ppp1r9b, Rbpj, Asxl2, Lancl2, Itgb3, Ccl5, Map4k2, Lif, Cdc42se1, Inpp5d, Tlr2, Rela, Map4k4, Madd, Igf1r, Zeb1, Igbp1, Gsk3b, Dkk3, Chuk, Tctn1, Cdc73, Als2cl, Arfgef1, Map2k2, Scyl2, Ptpn22, Ngef, Ilk, Acap…
GO:0006396	RNA processing	0.05104 ( 171 of 3350 genes )	0.01544 ( 525 of 34011 annotated genes )	4.121e-49	1.929e-45	Rps24, Ptbp2, Ddx56, Cdc5l, Rngtt, Sugp1, Ddx46, Snrnp200, Nhp2, Snw1, Sfswap, Rpl7, Rbmy1a1, Hnrnpu, Sf3a2, Rps7, Exosc1, Cwc15, Safb, Mbnl3, Hnrnpm, Ddx54, Hnrnpl, Akt2, 0610009D07Rik, Rps6, Xrn2, Ints6, Rps28, Ebna1bp2, Rpsa, Mphosph10, Isy1, Nop10, Rps21, Pabpc1, Paf1, Snrpd3, Zrsr2, Trmt12, Ints1, Eri1, Ccnl2, Cpsf3, Cdc73, D11Bwg0517e, Rps16, Rrp1, Celf2, Prpf40a, Fbl, Son, Sart3, Zcchc6, R…
GO:0009893	positive regulation of me	0.10597 ( 355 of 3350 genes )	0.04934 ( 1678 of 34011 annotated genes )	7.344e-49	3.438e-45	Usf2, Stat5b, Mylip, Hrh1, Chek2, Uhmk1, Plcd1, Rara, Paip1, Ets1, Brd7, Tcf20, Smad7, Bcl11b, Pbx4, Gnb2l1, Hsp90aa1, Ube3a, Ddit3, Bmp5, Atf7ip, Bves, Atad1, Rnf20, Smarcc2, Cnbp, Tspo, Apc, Akt2, Pde2a, Stub1, Nlrc5, Hcfc1, Araf, Bcl2, Nufip1, Tbl1x, Ilf2, Picalm, Strn3, Rbpj, Asxl2, Itgb3, Ccl5, Lif, Hspa4, Hmgn3, Paf1, Rnf4, Ifnb1, Vac14, Uimc1, Tmem188, Tlr2, Rela, Igf1r, Zeb1, Igbp1, Gsk3b…
GO:0010604	positive regulation of ma	0.09940 ( 333 of 3350 genes )	0.04501 ( 1531 of 34011 annotated genes )	1.594e-48	7.46e-45	Usf2, Stat5b, Mylip, Chek2, Uhmk1, Rara, Paip1, Ets1, Brd7, Tcf20, Smad7, Bcl11b, Pbx4, Gnb2l1, Ube3a, Ddit3, Bmp5, Atf7ip, Bves, Atad1, Rnf20, Smarcc2, Cnbp, Apc, Akt2, Pde2a, Stub1, Nlrc5, Hcfc1, Araf, Bcl2, Nufip1, Tbl1x, Ilf2, Picalm, Strn3, Rbpj, Asxl2, Itgb3, Ccl5, Lif, Hspa4, Hmgn3, Paf1, Rnf4, Ifnb1, Uimc1, Tmem188, Tlr2, Rela, Igf1r, Zeb1, Igbp1, Gsk3b, Cdc73, Arfgef1, Scyl2, Ilk, Hsph1,…
GO:0012501	programmed cell death	0.09463 ( 317 of 3350 genes )	0.04187 ( 1424 of 34011 annotated genes )	2.142e-48	1.003e-44	Uaca, Stat5b, Chek2, Prkcb, Rara, Ets1, Birc6, Bcl11b, Krit1, Gnb2l1, Trp53bp2, Gpi1, Ddit3, Ambra1, Tspo, Apc, Rps3, Sgk3, Akt2, Tap1, Hmgcr, Rtn4, Ctrb1, Bcl2, Araf, Park7, Ccar1, Pycard, Dido1, Dram1, 2610018G03Rik, Ccl5, Hspa4, Ghitm, Pea15a, Ifnb1, Inpp5d, Terf1, Rhot1, Rela, Madd, Igf1r, Igbp1, Gsk3b, Prdx3, Ilk, Pdcd4, Hsph1, Son, Ing4, Arrb2, Tmbim4, Rad21, Tgfb1, Bat3, Casp9, Cbl, Trim24…
GO:0006915	apoptosis	0.09373 ( 314 of 3350 genes )	0.04131 ( 1405 of 34011 annotated genes )	2.607e-48	1.22e-44	Uaca, Stat5b, Chek2, Prkcb, Rara, Ets1, Birc6, Bcl11b, Krit1, Gnb2l1, Trp53bp2, Gpi1, Ddit3, Ambra1, Tspo, Apc, Rps3, Sgk3, Akt2, Tap1, Hmgcr, Rtn4, Ctrb1, Bcl2, Araf, Park7, Ccar1, Pycard, Dido1, Dram1, 2610018G03Rik, Ccl5, Hspa4, Ghitm, Pea15a, Ifnb1, Inpp5d, Terf1, Rhot1, Rela, Madd, Igf1r, Igbp1, Gsk3b, Prdx3, Ilk, Pdcd4, Hsph1, Son, Ing4, Arrb2, Tmbim4, Rad21, Tgfb1, Bat3, Casp9, Cbl, Trim24…
GO:0044281	small molecule metabolic	0.12448 ( 417 of 3350 genes )	0.06304 ( 2144 of 34011 annotated genes )	1.206e-47	5.646e-44	Stat5b, Suclg1, Myo9b, Nsdhl, Atic, Dgkd, St6gal2, Gnb2l1, Hsp90aa1, Dnmt3a, Txnl1, Gpi1, Ak2, Gad2, Aco1, Mfn1, Ezh1, Atf7ip, Ldhd, Bves, Atad1, Sipa1l1, Pde3b, Flna, Mdp1, Pde1b, Apc, Rabgap1, Mthfd1l, Iars, Akt2, Gna13, Pde2a, Tap1, Hmgcr, Arhgap1, Alox5, 6430573F11Rik, Ppp1cb, Idh3g, Gsta1, Gpx3, Bcor, Ahsa1, Gnl2, Gnai2, Arl4a, Abcc2, Setd1a, Tmem188, Rhot1, Pgm3, Ncor2, Gsk3b, Hdlbp, Arfgef…
GO:0031325	positive regulation of ce	0.10000 ( 335 of 3350 genes )	0.04593 ( 1562 of 34011 annotated genes )	2.1e-47	9.828e-44	Usf2, Stat5b, Hrh1, Chek2, Uhmk1, Plcd1, Rara, Paip1, Ets1, Brd7, Tcf20, Smad7, Bcl11b, Pbx4, Gnb2l1, Hsp90aa1, Ube3a, Ddit3, Bmp5, Atf7ip, Bves, Atad1, Rnf20, Smarcc2, Cnbp, Tspo, Akt2, Stub1, Nlrc5, Araf, Bcl2, Nufip1, Tbl1x, Ilf2, Picalm, Strn3, Rbpj, Asxl2, Itgb3, Ccl5, Lif, Hmgn3, Paf1, Rnf4, Ifnb1, Vac14, Uimc1, Tmem188, Tlr2, Rela, Igf1r, Zeb1, Igbp1, Gsk3b, Cdc73, Arfgef1, Scyl2, Ilk, Arr…
GO:0051276	chromosome organization	0.05433 ( 182 of 3350 genes )	0.01764 ( 600 of 34011 annotated genes )	3.428e-47	1.604e-43	Ino80, Prkcb, Ctcf, Lats1, Brd7, Smc1a, Dnmt3a, Kdm5d, Bub3, Setd7, Rcor1, Ezh1, Chd7, Cdc23, Rnf20, Nsmce2, Kdm2a, Ubr2, Smarcc2, Kat2b, Trp53, Rnf168, Apc, Rad54l, Kdm6a, Hjurp, Pkn1, Prkdc, Nipbl, Nap1l4, Hcfc1, 2410022L05Rik, Ubn1, Hdac1, L3mbtl3, Chd3, Setd8, Bcor, Rag1, Brpf3, Hmgn3, Paf1, Rnf4, Dtx3l, Rad23b, Setd1a, Uimc1, Terf1, Usp22, Kat2a, Brd8, Smc3, Cdc73, Top1, H2afz, Pds5b, Nasp, …
GO:0065009	regulation of molecular f	0.10955 ( 367 of 3350 genes )	0.05272 ( 1793 of 34011 annotated genes )	5.152e-47	2.412e-43	Uaca, Myo9b, Prkcb, Plcd1, Rara, Smad7, Birc6, Krit1, Gnb2l1, Oas1d, Gpi1, Ddit3, Ttn, Bves, Cacna2d2, Sipa1l1, Flna, Itk, Apc, Rps3, Rabgap1, Akt2, Hjurp, Gna13, Foxn3, Arhgdia, Hmgcr, Arhgap1, Nlrc5, Prol1, Bcl2, Araf, Mphosph10, Ubn1, Park7, Pycard, Dusp7, Epb4.1, Calm1, Itgb3, Ccl5, Ahsa1, Map4k2, Hspa4, Hmgn3, Gnai2, Dock10, Ifnb1, Reck, Vac14, Terf1, Tlr2, Rela, Madd, Igf1r, Igbp1, Gsk3b, A…
GO:0016310	phosphorylation	0.09463 ( 317 of 3350 genes )	0.04272 ( 1453 of 34011 annotated genes )	1.921e-46	8.992e-43	Chek2, Cdk20, Prkacb, Uhmk1, Prkcb, Rara, Mapkapk2, Smad7, Dgkd, Mapk10, Gnb2l1, Trpm6, Vrk1, Ak2, Ttn, Bmp5, Dyrk4, Adrbk1, Csnk1g1, Mapk6, Il12rb1, Itk, Akap4, Apc, Sgk3, Akt2, Hmgcr, Nlrc5, Nrbp1, Araf, Bcl2, Dusp7, 2610018G03Rik, Ppp1r9b, Mark3, Smg1, Itgb3, Ccl5, Ntrk3, Map4k2, Lif, Hspa4, Gnai2, Ccdc88c, Samsn1, Inpp5d, Vac14, Tlr2, Map4k4, Madd, Igf1r, Gsk3b, Erc1, Chuk, Prdx3, Map2k2, Scy…
GO:0051649	establishment of localiza	0.08866 ( 297 of 3350 genes )	0.03878 ( 1319 of 34011 annotated genes )	2.381e-46	1.115e-42	Uaca, Rims4, Sec22b, Vps54, Uhmk1, Prkcb, Plcd1, Ap3m1, Vamp4, Pfn2, Hsp90aa1, Cltb, Anp32a, Adrbk1, Pde3b, Npc2, Flna, Vps26b, Copb1, Nup160, Ap2b1, Pde2a, Tap1, Sdccag1, Hmgcr, Rps28, Rtn4, Nrbp1, Gpsm2, Pycard, Trak1, Ubr5, Picalm, Rbpj, Tmed10, Rab8a, Ccl5, Map4k2, Lif, Hspa4, Hmgn3, Xpo7, Stxbp3a, Samm50, Tlr2, Rhot1, Gsk3b, Erc1, Scyl2, Copa, Lsg1, Tnnc1, Nop58, Tgfb1, Ndel1, Trappc2l, Rpl1…
GO:0022607	cellular component assemb	0.08627 ( 289 of 3350 genes )	0.03831 ( 1303 of 34011 annotated genes )	9.603e-44	4.495e-40	Chek2, Smad7, Pfn2, Dgkd, Gnb2l1, Hsp90aa1, Ttn, Atf7ip, Dync1h1, Flna, Apc, Hjurp, Ap2b1, Stub1, Hmgcr, Hcfc1, Lrrc50, Bcl2, Nufip1, Gpx3, Evl, Picalm, Ppp1r9b, Lsm14a, Tmed10, Rab8a, Itgb3, Ccl5, Tmem48, Olfm1, Hspa4, Stxbp3a, Rnf4, Eif3d, Zrsr2, Ccdc88c, Terf1, Pum2, Igf1r, Clgn, Gsk3b, Ssh2, Ezr, Arfgef1, Celf2, Ilk, Tgfb1, Bat3, Rpl24, Nat15, Actr3, Ggn, Bax, Add1, Vegfa, Itgb4, Ift172, Pip5…
GO:0006468	protein phosphorylation	0.08090 ( 271 of 3350 genes )	0.03487 ( 1186 of 34011 annotated genes )	1.673e-43	7.831e-40	Chek2, Cdk20, Prkacb, Uhmk1, Prkcb, Rara, Mapkapk2, Smad7, Mapk10, Gnb2l1, Trpm6, Vrk1, Ttn, Bmp5, Dyrk4, Adrbk1, Csnk1g1, Mapk6, Il12rb1, Itk, Apc, Sgk3, Akt2, Hmgcr, Nrbp1, Araf, Bcl2, Dusp7, 2610018G03Rik, Ppp1r9b, Mark3, Smg1, Itgb3, Ccl5, Ntrk3, Map4k2, Lif, Hspa4, Gnai2, Ccdc88c, Samsn1, Tlr2, Map4k4, Madd, Igf1r, Gsk3b, Erc1, Chuk, Map2k2, Scyl2, Ilk, Tnik, Nek9, Arrb2, Cd81, Tgfb1, Polr2h…
GO:0006950	response to stress	0.11672 ( 391 of 3350 genes )	0.05977 ( 2033 of 34011 annotated genes )	2.301e-43	1.077e-39	Uaca, Stat5b, Chek2, Mapkapk2, Smc1a, Mapk10, Hsp90aa1, Atox1, Mmp7, Ddit3, Ifi47, Adrbk1, Nsmce2, Il12rb1, Tspo, Apc, Rps3, Rad54l, Akt2, Gna13, Pde2a, Tap1, Stub1, Hmgcr, Alox5, Nlrc5, Rtn4, Bcl2, Park7, Pycard, Gpx3, Evl, Ubr5, Apitd1, Smg1, Mtap7, Rbpj, Itgb3, Ccl5, Ahsa1, Ntrk3, Map4k2, Hspa4, Il20rb, Cdc42se1, Vdac3, Stxbp3a, Ifnb1, Dtx3l, Rad23b, Vac14, Uimc1, Tlr2, Rela, Map4k4, Igf1r, Ig…
GO:0048731	system development	0.15463 ( 518 of 3350 genes )	0.08850 ( 3010 of 34011 annotated genes )	2.823e-43	1.321e-39	Mylip, Rara, Mapkapk2, Ccl21a, Bcl11b, Gpi1, Rcor1, Ttn, Ambra1, Adrbk1, Pde3b, Flna, Tspo, Akt2, Zhx2, Psd4, Bcl2, Gpsm2, Picalm, Rbpj, Itgb3, Lif, Stxbp3a, Reck, Chrnd, Inpp5d, Rela, Pgm3, Ncor2, Itga4, Zeb1, Gsk3b, Chuk, Cdc73, Prdx3, Ptpn22, Ilk, Tnik, 4932438A13Rik, Numb, Arrb2, Hdac4, Ndel1, Bat3, Pknox1, Add1, Vegfa, Ift172, Foxo4, Utrn, Atf5, Pik3r6, Ly6e, Npr2, Ywhae, Mif, Dock2, Nphp4, …
GO:0009057	macromolecule catabolic p	0.05164 ( 173 of 3350 genes )	0.01723 ( 586 of 34011 annotated genes )	3.992e-43	1.869e-39	Mylip, Chek2, Psmb10, Ubxn1, Smad7, Anapc2, Gnb2l1, Csnk1d, Zranb1, Ube3a, Rbm8a, Atg7, Usp24, Rnf20, Psmc4, Ubr2, Dnajc10, Flna, Fbxl3, Apc, Zhx2, Stub1, Xrn2, Ppp1cb, Ctrb1, Tbl1x, Ubr5, Psmd2, Fbxo45, Smg1, Tmed10, Psmb4, Il10, Cul3, Agap2, Pabpc1, Psmb9, Ngly1, Rnf4, Usp26, 1110018G07Rik, Ppp2r5c, Rad23b, Edem3, Rela, Usp22, Arntl, Eif2c1, Etf1, Sod1, Arrb2, Pten, Zmpste24, Apob, Tgfb1, Sox17…
GO:0016568	chromatin modification	0.04119 ( 138 of 3350 genes )	0.01182 ( 402 of 34011 annotated genes )	9.965e-43	4.665e-39	Ino80, Prkcb, Ctcf, Brd7, Dnmt3a, Kdm5d, Setd7, Rcor1, Ezh1, Chd7, Rnf20, Kdm2a, Ubr2, Smarcc2, Kat2b, Trp53, Rnf168, Kdm6a, Hjurp, Pkn1, Nipbl, Hcfc1, 2410022L05Rik, Ubn1, Hdac1, L3mbtl3, Setd8, Bcor, Rag1, Brpf3, Hmgn3, Paf1, Dtx3l, Setd1a, Uimc1, Terf1, Usp22, Kat2a, Brd8, Cdc73, Top1, Nasp, Ing4, Hdac4, Tgfb1, Bat3, Setd3, Morf4l1, Nat15, Mta2, Myst3, Brca1, Jhdm1d, Wac, Tada3, Srebf1, Leo1, …
GO:0046907	intracellular transport	0.06209 ( 208 of 3350 genes )	0.02337 ( 795 of 34011 annotated genes )	1.056e-42	4.942e-39	Uaca, Sec22b, Arl4c, Vps54, Uhmk1, Ap3m1, Ywhah, Vamp4, Ift46, Hsp90aa1, Cltb, Rab13, Scarb2, Anp32a, Tomm20, Stx5a, Ehd3, Use1, Scfd1, Npc2, Hgsnat, Flna, Trp53, Cog2, Vps26b, Copb1, Csk, Nup160, Arcn1, Bcap31, Ap2b1, Pde2a, Tap1, Sdccag1, Lrba, Rps28, Nxf1, Nrbp1, Rpsa, Uso1, Dhrs7c, Trak1, Ubr5, Picalm, Kpnb1, Lcp1, Tmed10, Xpo6, Rab8a, Cul3, Hspa4, Agap2, Xpo7, Samm50, Ucp2, Tlr2, Rhot1, Arnt…
GO:0010941	regulation of cell death	0.08119 ( 272 of 3350 genes )	0.03546 ( 1206 of 34011 annotated genes )	1.47e-42	6.883e-39	Uaca, Stat5b, Chek2, Rara, Ets1, Birc6, Bcl11b, Krit1, Gnb2l1, Trp53bp2, Gpi1, Ddit3, Ambra1, Tspo, Apc, Rps3, Sgk3, Akt2, Tap1, Hmgcr, Rtn4, Ctrb1, Bcl2, Araf, Park7, Ccar1, Pycard, 2610018G03Rik, Itgb3, Ccl5, Ntrk3, Hspa4, Pea15a, Ifnb1, Inpp5d, Terf1, Rela, Madd, Igf1r, Igbp1, Gsk3b, Prdx3, Ilk, Hsph1, Son, Ing4, Arrb2, Tmbim4, Tgfb1, Bat3, Casp9, Cbl, Trim24, Bax, Pak2, Vegfa, Rps3a, Clec2d, …
GO:0006325	chromatin organization	0.04418 ( 148 of 3350 genes )	0.01350 ( 459 of 34011 annotated genes )	5.005e-42	2.343e-38	Ino80, Prkcb, Ctcf, Brd7, Dnmt3a, Kdm5d, Setd7, Rcor1, Ezh1, Chd7, Rnf20, Kdm2a, Ubr2, Smarcc2, Kat2b, Trp53, Rnf168, Kdm6a, Hjurp, Pkn1, Nipbl, Nap1l4, Hcfc1, 2410022L05Rik, Ubn1, Hdac1, L3mbtl3, Chd3, Setd8, Bcor, Rag1, Brpf3, Hmgn3, Paf1, Dtx3l, Setd1a, Uimc1, Terf1, Usp22, Kat2a, Brd8, Cdc73, Top1, H2afz, Nasp, Ing4, Hdac4, Tgfb1, Bat3, Setd3, Morf4l1, Npm1, Nat15, Mta2, Hist3h2a, Myst3, Brca…
GO:0043067	regulation of programmed	0.07910 ( 265 of 3350 genes )	0.03437 ( 1169 of 34011 annotated genes )	7.022e-42	3.287e-38	Uaca, Stat5b, Chek2, Rara, Ets1, Birc6, Bcl11b, Krit1, Gnb2l1, Trp53bp2, Gpi1, Ddit3, Ambra1, Tspo, Apc, Rps3, Sgk3, Akt2, Tap1, Hmgcr, Rtn4, Ctrb1, Araf, Bcl2, Park7, Ccar1, Pycard, 2610018G03Rik, Ccl5, Hspa4, Pea15a, Ifnb1, Inpp5d, Terf1, Rela, Madd, Igf1r, Igbp1, Gsk3b, Prdx3, Ilk, Hsph1, Son, Ing4, Arrb2, Tmbim4, Tgfb1, Bat3, Casp9, Cbl, Trim24, Bax, Pak2, Vegfa, Rps3a, Clec2d, Atf5, Cst3, Cs…
GO:0042981	regulation of apoptosis	0.07851 ( 263 of 3350 genes )	0.03405 ( 1158 of 34011 annotated genes )	1.021e-41	4.78e-38	Uaca, Stat5b, Chek2, Rara, Ets1, Birc6, Bcl11b, Krit1, Gnb2l1, Trp53bp2, Gpi1, Ddit3, Ambra1, Tspo, Apc, Rps3, Sgk3, Akt2, Tap1, Hmgcr, Rtn4, Ctrb1, Araf, Bcl2, Park7, Ccar1, Pycard, 2610018G03Rik, Ccl5, Hspa4, Pea15a, Ifnb1, Inpp5d, Terf1, Rela, Madd, Igf1r, Igbp1, Gsk3b, Prdx3, Ilk, Hsph1, Son, Ing4, Arrb2, Tmbim4, Tgfb1, Bat3, Casp9, Cbl, Trim24, Bax, Pak2, Vegfa, Rps3a, Clec2d, Atf5, Csda, Mi…
GO:0002376	immune system process	0.08478 ( 284 of 3350 genes )	0.03822 ( 1300 of 34011 annotated genes )	1.129e-41	5.283e-38	Stat5b, Myo9b, H2-gs10, Cd247, Prkcb, Rara, Mapkapk2, Ets1, Ccl21a, Bcl11b, Hsp90aa1, Mmp7, Rcor1, Lgals8, Il12rb1, Itk, Apc, Tap1, Ubash3a, Nlrc5, Bcl2, Pycard, Ilf2, Picalm, Rbpj, Itgb3, Ccl5, Map4k2, Lif, Paf1, Il20rb, Zbtb32, Ifnb1, Samsn1, Inpp5d, Tlr2, Rela, Pgm3, Igf1r, Zeb1, Igbp1, Chuk, Cdc73, Prdx3, 2010106G01Rik, Ptpn22, Hsph1, Sit1, C4bp, Arrb2, Tgfb1, Bat3, Pknox1, Zbtb7b, Bax, Add1,…
GO:0030163	protein catabolic process	0.04179 ( 140 of 3350 genes )	0.01235 ( 420 of 34011 annotated genes )	1.162e-41	5.44e-38	Mylip, Chek2, Psmb10, Ubxn1, Smad7, Anapc2, Gnb2l1, Csnk1d, Zranb1, Ube3a, Atg7, Usp24, Rnf20, Psmc4, Ubr2, Dnajc10, Flna, Fbxl3, Apc, Stub1, Ctrb1, Tbl1x, Ubr5, Psmd2, Fbxo45, Psmb4, Il10, Cul3, Agap2, Psmb9, Rnf4, Usp26, 1110018G07Rik, Ppp2r5c, Rad23b, Edem3, Rela, Usp22, Arntl, Arrb2, Pten, Zmpste24, Sox17, Bat3, Trim24, Bax, Os9, Rbbp6, Psmc5, Nrd1, Wac, Lnx1, Yme1l1, Cul1, Psma7, Herc3, Usp3…
GO:0045184	establishment of protein	0.07284 ( 244 of 3350 genes )	0.03111 ( 1058 of 34011 annotated genes )	7.003e-40	3.278e-36	Uaca, Kif20a, Sec22b, Vps54, Uhmk1, Ap3m1, Lats1, Appl1, Ywhah, Vamp4, Ift46, Ccr7, Gnb2l1, Hsp90aa1, Cltb, Rab13, Scarb2, Cep192, Atg7, Tomm20, Stx5a, Ehd3, Use1, Scfd1, Flna, Trp53, Cog2, Vps26b, Copb1, Lax1, Csk, Nup160, Arcn1, Bcap31, Ap2b1, Pde2a, Tap1, Calcrl, Tram1l1, Rab22a, Uso1, Snx12, Pycard, Cd27, Ubr5, Snx7, Picalm, Kpnb1, Rbpj, Lcp1, Tmed10, Xpo6, Rab8a, Il10, Tmem48, Hspa4, Xpo7, S…
GO:0051128	regulation of cellular co	0.07522 ( 252 of 3350 genes )	0.03270 ( 1112 of 34011 annotated genes )	8.377e-40	3.921e-36	Ino80, Phpt1, Mycbp2, Wisp2, Ctcf, Wasl, Lats1, Frzb, Ets1, Brd7, Appl1, Ywhah, Pfn2, Ift46, Anapc2, Ccr7, Gnb2l1, Hsp90aa1, 2400003C14Rik, Zranb1, Sez6, Fis1, Cep192, Rapgef4, Cdc23, Atf7ip, Lgals1, Atad1, Sipa1l1, Nsmce2, Trp53, Sgip1, Apc, Csk, Hjurp, Bclaf1, Stub1, Nipbl, Hcfc1, Rtn4, Klk6, Bcl2, Kiss1r, Evl, Picalm, Clip1, Ppp1r9b, Larp4, Bin1, Bcor, Tnk2, Ntrk3, Lif, Fxn, Adipor2, Sema3a, B…
GO:0031324	negative regulation of ce	0.07731 ( 259 of 3350 genes )	0.03443 ( 1171 of 34011 annotated genes )	5.694e-39	2.665e-35	Ubxn1, Rara, Brd7, Smad7, Smc1a, Zfp386, Gnb2l1, Dnmt3a, Sfswap, Rcor1, Ezh1, Atf7ip, Bmp5, Mina, Ubr2, Smarcc2, Tspo, Rps3, Akt2, Zhx2, Pde2a, Foxn3, Tbl1x, Strn3, Rbpj, Zhx1, Bcor, Lancl2, Itgb3, Ccl5, Hspa4, Arid4a, Paf1, Hes2, Ifnb1, Samsn1, Hivep1, Inpp5d, Uimc1, Terf1, Rela, Ncor2, Zeb1, Igbp1, Gsk3b, Dkk3, Smc3, Cdc73, Pdcd4, Ing4, Tshz3, Arrb2, Hdac4, Tgfb1, Sox17, Foxk1, Bat3, Mta2, Trim…
GO:0009892	negative regulation of me	0.08418 ( 282 of 3350 genes )	0.03908 ( 1329 of 34011 annotated genes )	6.269e-39	2.935e-35	Hrh1, Ubxn1, Rara, Brd7, Smad7, Smc1a, Zfp386, Gnb2l1, Dnmt3a, Sfswap, Rcor1, Ezh1, Bmp5, Atf7ip, Pde3b, Mina, Ubr2, Smarcc2, Flna, Tspo, Rps3, Akt2, Zhx2, Pde2a, Foxn3, Tbl1x, Strn3, Rbpj, Zhx1, Bcor, Lancl2, Itgb3, Ccl5, Hspa4, Arid4a, Paf1, Hes2, Ifnb1, Samsn1, Hivep1, Inpp5d, Uimc1, Terf1, Rela, Ncor2, Zeb1, Igbp1, Gsk3b, Dkk3, Smc3, Cdc73, Pdcd4, Ing4, Tshz3, Arrb2, Hdac4, Tgfb1, Sox17, Foxk…
GO:0016071	mRNA metabolic process	0.03851 ( 129 of 3350 genes )	0.01135 ( 386 of 34011 annotated genes )	1.318e-38	6.169e-35	Hnrnph1, Dhx38, Cdk13, Nudt21, Ptbp2, Dhx15, Strap, Mapkapk2, Upf2, Snrpg, Mettl3, Cdc5l, Srrm1, Rngtt, Sugp1, Ddx46, Prmt5, Hnrnpa1, Ddx39, Snw1, Sfswap, Rbm8a, Rbmy1a1, Hnrnpu, Cpsf6, Sf3a2, Bcas2, Patl1, Luc7l3, Snrnp70, Cwc15, Sf3a3, Safb, Mbnl3, Thoc1, Hnrnpm, Celf1, U2af2, Hnrnpl, Hnrnpf, Zhx2, Mbnl1, 0610009D07Rik, Xrn2, Papolg, Cdk11b, Isy1, Ahcyl1, Smg7, Smg1, Srsf10, Prpf31, Rnmt, Rbm25…
GO:0043933	macromolecular complex su	0.06746 ( 226 of 3350 genes )	0.02828 ( 962 of 34011 annotated genes )	2.764e-38	1.294e-34	Ict1, Tuba8, Ptbp2, Ctcf, Wasl, Tuba1b, Lats1, Pfn2, Dgkd, Gnb2l1, Hsp90aa1, Ttn, Atf7ip, Crtc3, Dync1h1, Oxa1l, Ehd3, Smarcc2, Hgsnat, Flna, Trp53, Apc, Hjurp, Ap2b1, Bclaf1, Stub1, Rps6, Nap1l4, Hmgcr, Tuba1a, Hcfc1, Lrrc50, Rpsa, Nufip1, Gpx3, Evl, Picalm, H2-Ke2, Clip1, Lsm14a, Tmed10, Wdr19, Ccl5, Tmem48, Olfm1, Hspa4, Stxbp3a, Rnf4, Eif3d, Zrsr2, Gabra6, Ccdc88c, Terf1, Pum2, Vasp, Creb1, I…
GO:0006366	transcription from RNA po	0.07851 ( 263 of 3350 genes )	0.03558 ( 1210 of 34011 annotated genes )	3.474e-38	1.626e-34	Usf2, Stat5b, Prkcb, Rara, Ets1, Brd7, Tcf20, Smad7, Bcl11b, Pbx4, Med8, Dnmt3a, Ube3a, Ezh1, Ddit3, Bmp5, Atf7ip, Mina, Cnbp, Akt2, Zhx2, Pde2a, Foxn3, Nlrc5, Nufip1, Tbl1x, Strn3, Rbpj, Asxl2, Zhx1, Bcor, Lif, Hmgn3, Paf1, Rnf4, Ifnb1, Hivep1, Tlr2, Rela, Ncor2, Zeb1, Igbp1, Gsk3b, Cdc73, Arrb2, Hdac4, Rad21, Tgfb1, Sox17, Foxk1, Setd3, Polr2h, Pknox1, Med12, Brwd1, Zbtb7b, Mta2, Gtf2f1, Vegfa,…
GO:0051716	cellular response to stim	0.24090 ( 807 of 3350 genes )	0.16486 ( 5607 of 34011 annotated genes )	6.498e-38	3.042e-34	Uaca, Hrh1, Prkacb, Cd247, Arhgef3, Rara, Mapkapk2, Brd7, Smc1a, Gpr133, Tgtp1, Dnmt3a, Rassf2, Ttn, Bves, Adrbk1, Pde3b, Nsmce2, Mapk6, Gpr174, Flna, Rabgap1, Duox1, Akt2, Arhgdia, Psd4, Nlrc5, Bcl2, Araf, Gpsm2, Park7, Gpx3, Dusp7, Ubr5, Apitd1, Smg1, Rbpj, Lancl2, Itgb3, Lif, Grid2ip, Hmgn3, Cdc42se1, Arl4a, Pea15a, Gpr45, Ccdc88c, Inpp5d, Uimc1, Rhot1, Rela, Itga4, Zeb1, Gsk3b, Dkk3, Chuk, Cd…
GO:0048869	cellular developmental pr	0.13433 ( 450 of 3350 genes )	0.07645 ( 2600 of 34011 annotated genes )	6.532e-38	3.058e-34	Stat5b, Myo9b, Uhmk1, Rara, Ets1, Smc1a, Bcl11b, Hsp90aa1, Rcor1, Lgals8, Ttn, Bmp5, Bves, Ambra1, Rnf17, Cacna2d2, Sipa1l1, Flna, Tspo, Itk, Apc, Akt2, Gna13, Zhx2, Adamts9, Pde2a, Psd4, Rtn4, Lrrc50, Bcl2, Gpsm2, Ubn1, Tbl1x, Evl, Picalm, Ppp1r9b, Larp4, Mtap7, Rbpj, Ggnbp2, Asxl2, Rab8a, Itgb3, Ccl5, Ntrk3, Lif, Paf1, Arl4a, Ifnb1, Hcn1, Rufy3, Inpp5d, Med15, Rela, Ncor2, Igf1r, Clgn, Zeb1, Gs…
GO:0015031	protein transport	0.06955 ( 233 of 3350 genes )	0.02993 ( 1018 of 34011 annotated genes )	1.53e-37	7.161e-34	Uaca, Kif20a, Sec22b, Vps54, Uhmk1, Ap3m1, Lats1, Ywhah, Vamp4, Ift46, Ccr7, Hsp90aa1, Cltb, Rab13, Scarb2, Atg7, Tomm20, Stx5a, Ehd3, Use1, Scfd1, Flna, Trp53, Cog2, Vps26b, Copb1, Lax1, Csk, Nup160, Arcn1, Bcap31, Ap2b1, Pde2a, Tap1, Calcrl, Tram1l1, Rab22a, Uso1, Snx12, Pycard, Cd27, Ubr5, Snx7, Picalm, Kpnb1, Rbpj, Lcp1, Tmed10, Xpo6, Rab8a, Il10, Tmem48, Hspa4, Xpo7, Stxbp3a, Samm50, Rab9, T…
GO:0007154	cell communication	0.10239 ( 343 of 3350 genes )	0.05298 ( 1802 of 34011 annotated genes )	5.845e-37	2.736e-33	Usf2, Hrh1, Rims4, Prkcb, Rara, Smad7, Pfn2, Slc20a1, Ube3a, Gad2, Clcn1, Ddit3, Bmp5, Atad1, Cacna2d2, Adrbk1, Sipa1l1, Pde3b, Ubr2, Flna, Pde1b, Apc, Sgk3, Akt2, Ap2b1, Ubash3a, Hmgcr, Nlrc5, Rtn4, Park7, Ubr5, Snx7, Strn3, Rbpj, Asxl2, Rab8a, Lancl2, Itgb3, Ccl5, Map4k2, Lif, Grid2ip, Hmgn3, Gnai2, Cdc42se1, Kcnq2, Vdac3, Stxbp3a, Inpp5d, Tlr2, Rela, Igf1r, Igbp1, Gsk3b, Dkk3, Chuk, Cdc73, Scy…
GO:0065003	macromolecular complex as	0.06239 ( 209 of 3350 genes )	0.02582 ( 878 of 34011 annotated genes )	2.53e-36	1.184e-32	Tuba8, Ptbp2, Wasl, Tuba1b, Lats1, Pfn2, Dgkd, Gnb2l1, Hsp90aa1, Ttn, Atf7ip, Crtc3, Dync1h1, Oxa1l, Ehd3, Hgsnat, Flna, Trp53, Apc, Hjurp, Ap2b1, Bclaf1, Stub1, Rps6, Nap1l4, Hmgcr, Tuba1a, Hcfc1, Lrrc50, Rpsa, Nufip1, Gpx3, Evl, Picalm, H2-Ke2, Clip1, Lsm14a, Tmed10, Wdr19, Ccl5, Tmem48, Olfm1, Hspa4, Stxbp3a, Rnf4, Eif3d, Zrsr2, Gabra6, Ccdc88c, Terf1, Pum2, Vasp, Creb1, Igf1r, Clgn, Gsk3b, Ef…
GO:0009205	purine ribonucleoside tri	0.04328 ( 145 of 3350 genes )	0.01447 ( 492 of 34011 annotated genes )	3.354e-36	1.57e-32	Rhebl1, Ino80, Ercc3, Tuba8, Myo9b, Tuba1b, Atp2a1, Ccr7, Gnb2l1, Hsp90aa1, Rab13, Atp2a2, Ak2, Mfn1, Atf7ip, Ldhd, Bves, Atad1, Sipa1l1, Rabgap1, Akt2, Gna13, Acap2, Tap1, Arhgap1, Tuba1a, Rab22a, Atp6v1g1, Tbc1d5, Bin1, Agap2, Gnl2, Gnai2, Arl4a, Rhou, Rap2c, Abcc2, Arhgef10l, Rab9, Rhot1, Rab7, Gsk3b, Eftud1, Gnas, Arfgef1, Arhgap4, Entpd5, Top1, Ralgapa2, Rab21, Ngef, Acap1, Lsg1, Arrb2, Ccl1…
GO:0009144	purine nucleoside triphos	0.04358 ( 146 of 3350 genes )	0.01464 ( 498 of 34011 annotated genes )	3.697e-36	1.73e-32	Rhebl1, Ino80, Ercc3, Tuba8, Myo9b, Tuba1b, Atp2a1, Ccr7, Gnb2l1, Hsp90aa1, Rab13, Atp2a2, Ak2, Mfn1, Atf7ip, Ldhd, Bves, Atad1, Sipa1l1, Rabgap1, Akt2, Gna13, Acap2, Tap1, Arhgap1, Tuba1a, Rab22a, Atp6v1g1, Tbc1d5, Bin1, Agap2, Gnl2, Gnai2, Arl4a, Rhou, Rap2c, Abcc2, Arhgef10l, Rab9, Rhot1, Rab7, Gsk3b, Eftud1, Gnas, Arfgef1, Arhgap4, Entpd5, Top1, Ralgapa2, Rab21, Ngef, Acap1, Lsg1, Arrb2, Ccl1…
GO:0009199	ribonucleoside triphospha	0.04328 ( 145 of 3350 genes )	0.01455 ( 495 of 34011 annotated genes )	7.128e-36	3.337e-32	Rhebl1, Ino80, Ercc3, Tuba8, Myo9b, Tuba1b, Atp2a1, Ccr7, Gnb2l1, Hsp90aa1, Rab13, Atp2a2, Ak2, Mfn1, Atf7ip, Ldhd, Bves, Atad1, Sipa1l1, Rabgap1, Akt2, Gna13, Acap2, Tap1, Arhgap1, Tuba1a, Rab22a, Atp6v1g1, Tbc1d5, Bin1, Agap2, Gnl2, Gnai2, Arl4a, Rhou, Rap2c, Abcc2, Arhgef10l, Rab9, Rhot1, Rab7, Gsk3b, Eftud1, Gnas, Arfgef1, Arhgap4, Entpd5, Top1, Ralgapa2, Rab21, Ngef, Acap1, Lsg1, Arrb2, Ccl1…
GO:0006195	purine nucleotide catabol	0.04269 ( 143 of 3350 genes )	0.01429 ( 486 of 34011 annotated genes )	1.249e-35	5.845e-32	Rhebl1, Ino80, Ercc3, Zc3hav1, Tuba8, Myo9b, Tuba1b, Atp2a1, Ccr7, Gnb2l1, Hsp90aa1, Rab13, Atp2a2, Mfn1, Atf7ip, Bves, Atad1, Oxa1l, Sipa1l1, Pde3b, Dnajc10, Pde1b, Rabgap1, Akt2, Gna13, Acap2, Pde2a, Tap1, Arhgap1, Tuba1a, Rab22a, Atp6v1g1, Tbc1d5, Bin1, Ahsa1, Agap2, Gnl2, Gnai2, Arl4a, Rhou, Rap2c, Abcc2, Arhgef10l, Rab9, Rhot1, Rab7, Gsk3b, Eftud1, Gnas, Arfgef1, Arhgap4, Top1, Ralgapa2, Rab…
GO:0007010	cytoskeleton organization	0.05373 ( 180 of 3350 genes )	0.02073 ( 705 of 34011 annotated genes )	1.534e-35	7.18e-32	Kif20a, Ino80, Chek2, Phpt1, Mycbp2, Vps54, Tuba8, Wasl, Kif2a, Lats1, Ywhah, Pfn2, Ift46, Ccr7, Csnk1d, Bub3, Arhgef18, Zranb1, Cep192, Ttn, Sipa1l1, Rock1, Flna, Sgol1, Apc, Ckap5, Tln1, Nin, Lsp1, Nefh, Pfn4, Krt9, Bcl2, Gpsm2, Kiss1r, Evl, Clip1, Ppp1r9b, Larp4, Epb4.1, Mtap7, Chd3, Lcp1, Cul3, Grid2ip, Agap2, Rhou, Rnf4, Daam1, Arhgef10l, Ccdc88c, Terf1, Coro1c, Vasp, Gsk3b, Ssh2, Foxp1, Ezr…
GO:0009150	purine ribonucleotide met	0.04418 ( 148 of 3350 genes )	0.01517 ( 516 of 34011 annotated genes )	1.906e-35	8.924e-32	Rhebl1, Ino80, Ercc3, Tuba8, Myo9b, Tuba1b, Atp2a1, Atic, Ccr7, Gnb2l1, Hsp90aa1, Rab13, Atp2a2, Ak2, Mfn1, Atf7ip, Ldhd, Bves, Atad1, Sipa1l1, Rabgap1, Akt2, Gna13, Acap2, Tap1, Arhgap1, Tuba1a, Rab22a, Atp6v1g1, Tbc1d5, Bin1, Agap2, Gnl2, Gnai2, Arl4a, Rhou, Rap2c, Abcc2, Arhgef10l, Rab9, Rhot1, Rab7, Gsk3b, Eftud1, Gnas, Arfgef1, Arhgap4, Entpd5, Top1, Ralgapa2, Rab21, Ngef, Acap1, Lsg1, Arrb2…
GO:0006412	translation	0.03940 ( 132 of 3350 genes )	0.01255 ( 427 of 34011 annotated genes )	1.958e-35	9.165e-32	Ict1, Rps24, Rpl32, Rpl18a, Uhmk1, Rara, Paip1, Gars, Rars2, Gnb2l1, Denr, Rplp0, Tnrc6b, Aco1, Tnrc6a, Rpl7, Rps7, Eif5b, Eif3k, Rps3, Iars, Mars, Akt2, Eif4g2, Rpl13, Rps28, Rpsa, Eef1a1, Lsm14a, Rps21, Rplp1, Eif3j, Dhx29, Barhl2, Eif3d, Eif4e3, Rpl4, Pum2, Mrpl21, Eftud1, Pum1, Rps16, Eif2c1, Eif4enif1, Etf1, Rpl11, Rpl27a, Rpl24, Eef2, Rbm3, Rps3a, Rplp2, Ppp1r15a, Caprin1, Sarnp, Eif2b2, Dn…
GO:0010605	negative regulation of ma	0.07761 ( 260 of 3350 genes )	0.03634 ( 1236 of 34011 annotated genes )	3.098e-35	1.45e-31	Ubxn1, Rara, Brd7, Smad7, Smc1a, Zfp386, Gnb2l1, Dnmt3a, Sfswap, Rcor1, Ezh1, Atf7ip, Mina, Ubr2, Smarcc2, Flna, Rps3, Akt2, Zhx2, Pde2a, Foxn3, Tbl1x, Strn3, Rbpj, Zhx1, Bcor, Lancl2, Itgb3, Hspa4, Arid4a, Paf1, Hes2, Samsn1, Hivep1, Inpp5d, Uimc1, Terf1, Rela, Ncor2, Zeb1, Igbp1, Gsk3b, Dkk3, Smc3, Cdc73, Pdcd4, Ing4, Tshz3, Arrb2, Hdac4, Tgfb1, Sox17, Foxk1, Bat3, Mta2, Trim24, Bax, Supt5h, If…
GO:0008283	cell proliferation	0.08060 ( 270 of 3350 genes )	0.03846 ( 1308 of 34011 annotated genes )	4.122e-35	1.93e-31	Stat5b, Plcd1, Rara, Ets1, Brd7, Birc6, Bcl11b, Krit1, Mmp7, Bmp5, Ambra1, Mina, Il12rb1, Cnbp, Tspo, Apc, Hmgcr, Bcl2, Park7, Mtap7, Rbpj, Itgb3, Ccl5, Lif, Il20rb, Gnai2, Zbtb32, Inpp5d, Rela, Ncor2, Zeb1, Gsk3b, Chuk, Cdc73, Prdx3, BC004004, Ptpn22, Ilk, Ing4, Numb, Hdac4, Atp2b1, Cd81, Tgfb1, Sox17, Ndel1, Tes, Atp5a1, Nat15, Trim24, Bax, Col8a2, Vegfa, Foxo4, Rac2, Slc9a3r1, Cst3, Dnmt1, Mif…
GO:0022402	cell cycle process	0.05701 ( 191 of 3350 genes )	0.02290 ( 779 of 34011 annotated genes )	4.352e-35	2.037e-31	Rfwd3, Ino80, Chek2, Ercc3, Csnk1a1, Uhmk1, Wasl, Mapkapk2, Kif2a, Lats1, Brd7, Birc6, Ywhah, Smc1a, Anapc2, Wee2, Csnk1d, Vrk1, Bub3, Anp32b, Cep192, Ddit3, Cdc23, Pds5a, Nfatc1, Ccnk, Nsmce2, Ubr2, Flna, Trp53, Sgol1, Apc, Ckap5, Nipbl, Rps6, Pim1, Sesn3, Gas2, Bcl2, Gpsm2, Arl8b, Apitd1, Chd3, Setd8, Cul3, Casp2, Lif, Ptprc, Paf1, Rhou, Rnf4, Ppp2r5c, Uimc1, Terf1, Psmd13, Clgn, Gsk3b, 4922501…
GO:0006357	regulation of transcripti	0.07433 ( 249 of 3350 genes )	0.03419 ( 1163 of 34011 annotated genes )	4.805e-35	2.249e-31	Usf2, Stat5b, Ino80, Ercc3, Prkcb, Sp3, Rara, Frzb, Ets1, Brd7, Tcf20, Smad7, Bcl11b, Rpap2, Pbx4, Med8, Dnmt3a, Cbfb, Ube3a, Snw1, Ezh1, Ddit3, Fos, Bmp5, Atf7ip, Nfatc1, Zfp292, Mina, Cops2, Kat2b, Safb, Cnbp, Trp53, Tcf7, Nfkb1, Nr2c2, Rfx4, Akt2, Zhx2, Pkn1, Pde2a, Prkdc, Nipbl, Foxn3, Zbtb20, Nlrc5, Tcf7l1, Stat1, Mkl1, Nufip1, Hdac1, Tbl1x, Whsc2, Strn3, Rbpj, Per1, Asxl2, Zhx1, Setd8, Bcor…
GO:0009141	nucleoside triphosphate m	0.04358 ( 146 of 3350 genes )	0.01497 ( 509 of 34011 annotated genes )	5.524e-35	2.586e-31	Rhebl1, Ino80, Ercc3, Tuba8, Myo9b, Tuba1b, Atp2a1, Ccr7, Gnb2l1, Hsp90aa1, Rab13, Atp2a2, Ak2, Mfn1, Atf7ip, Ldhd, Bves, Atad1, Sipa1l1, Rabgap1, Akt2, Gna13, Acap2, Tap1, Arhgap1, Tuba1a, Rab22a, Atp6v1g1, Tbc1d5, Bin1, Agap2, Gnl2, Gnai2, Arl4a, Rhou, Rap2c, Abcc2, Arhgef10l, Rab9, Rhot1, Rab7, Gsk3b, Eftud1, Gnas, Arfgef1, Arhgap4, Entpd5, Top1, Ralgapa2, Rab21, Ngef, Acap1, Lsg1, Arrb2, Ccl1…
GO:0006397	mRNA processing	0.03254 ( 109 of 3350 genes )	0.00914 ( 311 of 34011 annotated genes )	6.346e-35	2.971e-31	Hnrnph1, Dhx38, Cdk13, Nudt21, Ptbp2, Dhx15, Strap, Snrpg, Cdc5l, Srrm1, Rngtt, Sugp1, Ddx46, Prmt5, Hnrnpa1, Ddx39, Snw1, Sfswap, Rbmy1a1, Hnrnpu, Cpsf6, Sf3a2, Bcas2, Luc7l3, Snrnp70, Cwc15, Sf3a3, Safb, Mbnl3, Thoc1, Hnrnpm, Celf1, U2af2, Hnrnpl, Hnrnpf, Mbnl1, 0610009D07Rik, Xrn2, Papolg, Cdk11b, Isy1, Ahcyl1, Srsf10, Prpf31, Rnmt, Rbm25, Pabpc1, Cstf2, Rbm5, Paf1, Snrpd3, Zrsr2, Tra2a, Cpsf3…
GO:0051246	regulation of protein met	0.07552 ( 253 of 3350 genes )	0.03508 ( 1193 of 34011 annotated genes )	6.811e-35	3.188e-31	Mylip, Chek2, Uhmk1, Ctcf, Ubxn1, Rara, Paip1, Lats1, Brd7, Smad7, Ccr7, Gnb2l1, Csnk1d, Tnrc6b, Map3k5, Aco1, Tnrc6a, Hcls1, Ttn, Rapgef4, Bmp5, Atg7, Eif5b, Ccnk, Dnajc10, Kat2b, Flna, Trp53, Eif3k, Apc, Lax1, Csk, Akt2, Stub1, Nipbl, Eif4g2, Pim1, Hmgcr, Araf, Bcl2, Kiss1r, Dusp7, Psmd2, Ppp1r9b, Lsm14a, Bcor, Tnk2, Itgb3, Il10, Ccl5, Map4k2, Lif, Hspa4, Agap2, Fnta, Ptprc, Gnai2, Barhl2, Rap2…
GO:0072523	purine-containing compoun	0.04269 ( 143 of 3350 genes )	0.01450 ( 493 of 34011 annotated genes )	7.128e-35	3.336e-31	Rhebl1, Ino80, Ercc3, Zc3hav1, Tuba8, Myo9b, Tuba1b, Atp2a1, Ccr7, Gnb2l1, Hsp90aa1, Rab13, Atp2a2, Mfn1, Atf7ip, Bves, Atad1, Oxa1l, Sipa1l1, Pde3b, Dnajc10, Pde1b, Rabgap1, Akt2, Gna13, Acap2, Pde2a, Tap1, Arhgap1, Tuba1a, Rab22a, Atp6v1g1, Tbc1d5, Bin1, Ahsa1, Agap2, Gnl2, Gnai2, Arl4a, Rhou, Rap2c, Abcc2, Arhgef10l, Rab9, Rhot1, Rab7, Gsk3b, Eftud1, Gnas, Arfgef1, Arhgap4, Top1, Ralgapa2, Rab…
GO:0009259	ribonucleotide metabolic	0.04448 ( 149 of 3350 genes )	0.01552 ( 528 of 34011 annotated genes )	8.48e-35	3.969e-31	Rhebl1, Ino80, Ercc3, Tuba8, Myo9b, Tuba1b, Atp2a1, Atic, Ccr7, Gnb2l1, Hsp90aa1, Umps, Rab13, Atp2a2, Ak2, Mfn1, Atf7ip, Ldhd, Bves, Atad1, Sipa1l1, Rabgap1, Akt2, Gna13, Acap2, Tap1, Arhgap1, Tuba1a, Rab22a, Atp6v1g1, Tbc1d5, Bin1, Agap2, Gnl2, Gnai2, Arl4a, Rhou, Rap2c, Abcc2, Arhgef10l, Rab9, Rhot1, Rab7, Gsk3b, Eftud1, Gnas, Arfgef1, Arhgap4, Entpd5, Top1, Ralgapa2, Rab21, Ngef, Acap1, Lsg1,…
GO:0044265	cellular macromolecule ca	0.04000 ( 134 of 3350 genes )	0.01305 ( 444 of 34011 annotated genes )	9.905e-35	4.636e-31	Mylip, Chek2, Psmb10, Ubxn1, Smad7, Anapc2, Gnb2l1, Csnk1d, Zranb1, Ube3a, Rbm8a, Usp24, Rnf20, Ubr2, Dnajc10, Fbxl3, Zhx2, Stub1, Xrn2, Tbl1x, Ubr5, Fbxo45, Smg1, Psmb4, Cul3, Pabpc1, Psmb9, Rnf4, Usp26, 1110018G07Rik, Ppp2r5c, Rad23b, Edem3, Usp22, Eif2c1, Etf1, Sod1, Arrb2, Pten, Zmpste24, Apob, Bat3, Bax, Os9, Rbbp6, Psmc5, Wac, Lsm7, Lnx1, Yme1l1, Dcp1a, Cul1, Psma7, Herc3, Usp3, Huwe1, Psma…
GO:0031328	positive regulation of ce	0.07612 ( 255 of 3350 genes )	0.03558 ( 1210 of 34011 annotated genes )	1.065e-34	4.986e-31	Usf2, Stat5b, Ino80, Hrh1, Chek2, Ercc3, Uhmk1, Plcd1, Ctcf, Sp3, Rara, Paip1, Ets1, Brd7, Tcf20, Ywhah, Bcl11b, Pbx4, Hsp90aa1, Cbfb, Ube3a, Snw1, Ddit3, Fos, Bmp5, Atf7ip, Rnf20, Nfatc1, Zfp292, Smarcc2, Kat2b, Safb, Cnbp, Trp53, Nfkb1, Arhgef11, Nr2c2, Rfx4, Akt2, Bclaf1, Prkdc, Calcrl, Nlrc5, Tcf7l1, Stat1, Mkl1, Nufip1, Hdac1, Tbl1x, Ilf2, Cd27, Picalm, Strn3, Rbpj, Hmbox1, Asxl2, Il10, Ccl5…
GO:0009891	positive regulation of bi	0.07731 ( 259 of 3350 genes )	0.03640 ( 1238 of 34011 annotated genes )	1.09e-34	5.103e-31	Usf2, Stat5b, Hrh1, Chek2, Uhmk1, Plcd1, Rara, Paip1, Ets1, Brd7, Tcf20, Bcl11b, Pbx4, Hsp90aa1, Ube3a, Ddit3, Bmp5, Atf7ip, Rnf20, Smarcc2, Cnbp, Akt2, Nlrc5, Nufip1, Tbl1x, Ilf2, Picalm, Strn3, Rbpj, Asxl2, Ccl5, Lif, Hmgn3, Paf1, Rnf4, Ifnb1, Tmem188, Tlr2, Rela, Igf1r, Zeb1, Igbp1, Gsk3b, Cdc73, Arfgef1, Ilk, Hsph1, Mtpn, Hdac4, Tgfb1, Sox17, Foxk1, Setd3, Pknox1, Med12, Zbtb7b, Mta2, Trim24,…
GO:0009166	nucleotide catabolic proc	0.04328 ( 145 of 3350 genes )	0.01494 ( 508 of 34011 annotated genes )	1.715e-34	8.027e-31	Rhebl1, Ino80, Ercc3, Zc3hav1, Tuba8, Myo9b, Tuba1b, Atp2a1, Ccr7, Gnb2l1, Hsp90aa1, Rab13, Atp2a2, Mfn1, Atf7ip, Bves, Atad1, Oxa1l, Sipa1l1, Pde3b, Dnajc10, Pde1b, Rabgap1, Akt2, Gna13, Acap2, Pde2a, Tap1, Arhgap1, Tuba1a, Rab22a, Atp6v1g1, Tbc1d5, Bin1, Ahsa1, Agap2, Gnl2, Gnai2, Arl4a, Rhou, Rap2c, Abcc2, Arhgef10l, Rab9, Rhot1, Rab7, Gsk3b, Eftud1, Gnas, Arfgef1, Arhgap4, Top1, Ralgapa2, Rab…
GO:0051239	regulation of multicellul	0.10000 ( 335 of 3350 genes )	0.05281 ( 1796 of 34011 annotated genes )	2.715e-34	1.271e-30	Stat5b, Mylip, Hrh1, Rims4, Prkcb, Rara, Mapkapk2, Ets1, Smad7, Pfn2, Bcl11b, Krit1, Hsp90aa1, Rcor1, Ddit3, Atad1, Cacna2d2, Adrbk1, Sipa1l1, Pde3b, Il12rb1, Tspo, Apc, Zhx2, Ubash3a, Hmgcr, Alox5, Rtn4, Prol1, Bcl2, Pycard, Rbpj, Bcor, Rab8a, Itgb3, Ccl5, Ntrk3, Lif, Grid2ip, Paf1, Il20rb, Gnai2, Zbtb32, Ifnb1, Rufy3, Inpp5d, Tlr2, Rela, Zeb1, Gsk3b, Ssh2, Anxa6, Cdc73, Ngef, Ilk, Clic1, Tnik, …
GO:0030154	cell differentiation	0.12687 ( 425 of 3350 genes )	0.07327 ( 2492 of 34011 annotated genes )	3.267e-34	1.529e-30	Stat5b, Uhmk1, Rara, Ets1, Smc1a, Bcl11b, Hsp90aa1, Rcor1, Lgals8, Ttn, Bmp5, Bves, Ambra1, Rnf17, Cacna2d2, Sipa1l1, Flna, Tspo, Itk, Apc, Akt2, Gna13, Zhx2, Adamts9, Pde2a, Psd4, Rtn4, Bcl2, Gpsm2, Ubn1, Tbl1x, Evl, Picalm, Ppp1r9b, Mtap7, Rbpj, Ggnbp2, Asxl2, Itgb3, Ccl5, Ntrk3, Lif, Paf1, Arl4a, Ifnb1, Hcn1, Rufy3, Inpp5d, Med15, Rela, Ncor2, Igf1r, Clgn, Zeb1, Gsk3b, Ssh2, Chuk, Tctn1, Smc3,…
GO:0050790	regulation of catalytic a	0.08537 ( 286 of 3350 genes )	0.04231 ( 1439 of 34011 annotated genes )	3.907e-34	1.829e-30	Uaca, Myo9b, Plcd1, Smad7, Birc6, Krit1, Gnb2l1, Oas1d, Gpi1, Ttn, Bves, Sipa1l1, Flna, Itk, Apc, Rps3, Rabgap1, Akt2, Gna13, Arhgdia, Hmgcr, Arhgap1, Nlrc5, Prol1, Araf, Bcl2, Mphosph10, Ubn1, Pycard, Dusp7, Itgb3, Ccl5, Ahsa1, Map4k2, Gnai2, Dock10, Ifnb1, Reck, Vac14, Terf1, Madd, Igf1r, Igbp1, Gsk3b, Arfgef1, Prdx3, Map2k2, Ngef, Ilk, Acap1, Tnik, Arrb2, Cd81, Tnnc1, Tgfb1, Ndel1, Casp9, Adcy…
GO:0055086	nucleobase, nucleoside an	0.06060 ( 203 of 3350 genes )	0.02555 ( 869 of 34011 annotated genes )	4.434e-34	2.075e-30	Rhebl1, Ino80, Ercc3, Zc3hav1, Tuba8, Myo9b, Tuba1b, Atp2a1, Gars, Atic, Hsd11b1, Ccr7, Gnb2l1, Hsp90aa1, Dnmt3a, Umps, Rab13, Atp2a2, Ak2, Dlst, Mfn1, Atf7ip, Ldhd, Bves, Atad1, Oxa1l, Sipa1l1, Pde3b, Dnajc10, Flna, Pde1b, Rabgap1, Mdh2, Akt2, Gna13, Acap2, Pde2a, Tap1, Calcrl, Arhgap1, Tuba1a, Idh3g, Rab22a, Atp6v1g1, Tbc1d5, Bin1, Ahsa1, Agap2, Gnl2, Gnai2, Arl4a, Rhou, Rap2c, Pgam1, Abcc2, Ar…
GO:0071844	cellular component assemb	0.06209 ( 208 of 3350 genes )	0.02652 ( 902 of 34011 annotated genes )	4.691e-34	2.196e-30	Ino80, Chek2, Tuba8, Ptbp2, Ctcf, Wasl, Tuba1b, Lats1, Smad7, Pfn2, Ift46, Wee2, Ccr7, Atg13, Csnk1d, Hsp90aa1, Cep192, Ttn, Atf7ip, Dync1h1, Oxa1l, Spata13, Rock1, Flna, Apc, Hjurp, Ap2b1, Tln1, Stub1, Rps6, Nap1l4, Tuba1a, Nefh, Lrrc50, Bcl2, Rpsa, Nufip1, Kiss1r, Evl, Picalm, H2-Ke2, Clip1, Ppp1r9b, Lsm14a, Lcp1, Wdr19, Rab8a, Itgb3, Cul3, Ccl5, Tmem48, Hspa4, Itga6, Rnf4, Eif3d, Zrsr2, Arhgef…
GO:0034655	nucleobase, nucleoside, n	0.04388 ( 147 of 3350 genes )	0.01547 ( 526 of 34011 annotated genes )	7.876e-34	3.687e-30	Rhebl1, Ino80, Ercc3, Zc3hav1, Tuba8, Myo9b, Tuba1b, Atp2a1, Ccr7, Gnb2l1, Hsp90aa1, Rab13, Atp2a2, Mfn1, Atf7ip, Bves, Atad1, Oxa1l, Sipa1l1, Pde3b, Dnajc10, Pde1b, Rabgap1, Akt2, Gna13, Acap2, Pde2a, Tap1, Arhgap1, Tuba1a, Rab22a, Atp6v1g1, Tbc1d5, Bin1, Ahsa1, Agap2, Gnl2, Gnai2, Arl4a, Rhou, Rap2c, Abcc2, Arhgef10l, Rab9, Rhot1, Rab7, Gsk3b, Eftud1, Gnas, Arfgef1, Arhgap4, Top1, Ralgapa2, Rab…
GO:0034656	nucleobase, nucleoside an	0.04388 ( 147 of 3350 genes )	0.01547 ( 526 of 34011 annotated genes )	7.876e-34	3.687e-30	Rhebl1, Ino80, Ercc3, Zc3hav1, Tuba8, Myo9b, Tuba1b, Atp2a1, Ccr7, Gnb2l1, Hsp90aa1, Rab13, Atp2a2, Mfn1, Atf7ip, Bves, Atad1, Oxa1l, Sipa1l1, Pde3b, Dnajc10, Pde1b, Rabgap1, Akt2, Gna13, Acap2, Pde2a, Tap1, Arhgap1, Tuba1a, Rab22a, Atp6v1g1, Tbc1d5, Bin1, Ahsa1, Agap2, Gnl2, Gnai2, Arl4a, Rhou, Rap2c, Abcc2, Arhgef10l, Rab9, Rhot1, Rab7, Gsk3b, Eftud1, Gnas, Arfgef1, Arhgap4, Top1, Ralgapa2, Rab…
GO:0044270	cellular nitrogen compoun	0.04478 ( 150 of 3350 genes )	0.01599 ( 544 of 34011 annotated genes )	8.884e-34	4.158e-30	Rhebl1, Ino80, Ercc3, Zc3hav1, Tuba8, Myo9b, Tuba1b, Atp2a1, Ccr7, Gnb2l1, Hsp90aa1, Rab13, Atp2a2, Mfn1, Atf7ip, Bves, Atad1, Oxa1l, Sipa1l1, Pde3b, Ido2, Dnajc10, Pde1b, Rabgap1, Akt2, Gna13, Acap2, Pde2a, Tap1, Arhgap1, Tuba1a, Rab22a, Atp6v1g1, Tbc1d5, Bin1, Ahsa1, Agap2, Gnl2, Gnai2, Arl4a, Rhou, Rap2c, Abcc2, Arhgef10l, Rab9, Rhot1, Rab7, Gsk3b, Eftud1, Gnas, Arfgef1, Arhgap4, Top1, Ralgapa…
GO:0051173	positive regulation of ni	0.07284 ( 244 of 3350 genes )	0.03390 ( 1153 of 34011 annotated genes )	1.637e-33	7.664e-30	Usf2, Stat5b, Ino80, Hrh1, Chek2, Ercc3, Ctcf, Sp3, Rara, Ets1, Brd7, Tcf20, Ywhah, Bcl11b, Pbx4, Hsp90aa1, Cbfb, Ube3a, Snw1, Ddit3, Fos, Bmp5, Atf7ip, Rnf20, Nfatc1, Zfp292, Smarcc2, Kat2b, Safb, Cnbp, Trp53, Rnf168, Nfkb1, Arhgef11, Nr2c2, Rfx4, Akt2, Bclaf1, Prkdc, Calcrl, Nlrc5, Tcf7l1, Stat1, Mkl1, Nufip1, Hdac1, Tbl1x, Ilf2, Picalm, Strn3, Rbpj, Hmbox1, Asxl2, Il10, Tcfap2c, Lif, Agap2, Hm…
GO:0046483	heterocycle metabolic pro	0.06448 ( 216 of 3350 genes )	0.02846 ( 968 of 34011 annotated genes )	3.82e-33	1.788e-29	Stat5b, Rhebl1, Ino80, Ercc3, Zc3hav1, Tuba8, Myo9b, Tuba1b, Atp2a1, Gars, Atic, Hsd11b1, Ccr7, Gnb2l1, Hsp90aa1, Dnmt3a, Umps, Rab13, Atp2a2, Ak2, Dlst, Mfn1, Atf7ip, Ldhd, Bves, Atad1, Oxa1l, Sipa1l1, Pde3b, Ido2, Dnajc10, Flna, Pde1b, Rabgap1, Mthfd1l, Mdh2, Akt2, Gna13, Acap2, Pde2a, Tap1, Calcrl, Arhgap1, Tuba1a, Idh3g, Rab22a, Atp6v1g1, Tbc1d5, Bin1, Ahsa1, Fxn, Agap2, Gnl2, Gnai2, Arl4a, R…
GO:0006753	nucleoside phosphate meta	0.05791 ( 194 of 3350 genes )	0.02429 ( 826 of 34011 annotated genes )	6.216e-33	2.91e-29	Rhebl1, Ino80, Ercc3, Zc3hav1, Tuba8, Myo9b, Tuba1b, Atp2a1, Atic, Hsd11b1, Ccr7, Gnb2l1, Hsp90aa1, Umps, Rab13, Atp2a2, Ak2, Dlst, Mfn1, Atf7ip, Ldhd, Bves, Atad1, Oxa1l, Sipa1l1, Pde3b, Dnajc10, Flna, Pde1b, Rabgap1, Mdh2, Akt2, Gna13, Acap2, Pde2a, Tap1, Calcrl, Arhgap1, Tuba1a, Idh3g, Rab22a, Atp6v1g1, Tbc1d5, Bin1, Ahsa1, Agap2, Gnl2, Gnai2, Arl4a, Rhou, Rap2c, Pgam1, Abcc2, Arhgef10l, Rab9,…
GO:0009117	nucleotide metabolic proc	0.05791 ( 194 of 3350 genes )	0.02429 ( 826 of 34011 annotated genes )	6.216e-33	2.91e-29	Rhebl1, Ino80, Ercc3, Zc3hav1, Tuba8, Myo9b, Tuba1b, Atp2a1, Atic, Hsd11b1, Ccr7, Gnb2l1, Hsp90aa1, Umps, Rab13, Atp2a2, Ak2, Dlst, Mfn1, Atf7ip, Ldhd, Bves, Atad1, Oxa1l, Sipa1l1, Pde3b, Dnajc10, Flna, Pde1b, Rabgap1, Mdh2, Akt2, Gna13, Acap2, Pde2a, Tap1, Calcrl, Arhgap1, Tuba1a, Idh3g, Rab22a, Atp6v1g1, Tbc1d5, Bin1, Ahsa1, Agap2, Gnl2, Gnai2, Arl4a, Rhou, Rap2c, Pgam1, Abcc2, Arhgef10l, Rab9,…
GO:0046700	heterocycle catabolic pro	0.04418 ( 148 of 3350 genes )	0.01591 ( 541 of 34011 annotated genes )	6.305e-33	2.951e-29	Rhebl1, Ino80, Ercc3, Zc3hav1, Tuba8, Myo9b, Tuba1b, Atp2a1, Ccr7, Gnb2l1, Hsp90aa1, Rab13, Atp2a2, Mfn1, Atf7ip, Bves, Atad1, Oxa1l, Sipa1l1, Pde3b, Ido2, Dnajc10, Pde1b, Rabgap1, Akt2, Gna13, Acap2, Pde2a, Tap1, Arhgap1, Tuba1a, Rab22a, Atp6v1g1, Tbc1d5, Bin1, Ahsa1, Agap2, Gnl2, Gnai2, Arl4a, Rhou, Rap2c, Abcc2, Arhgef10l, Rab9, Rhot1, Rab7, Gsk3b, Eftud1, Gnas, Arfgef1, Arhgap4, Top1, Ralgapa…
GO:0072521	purine-containing compoun	0.05433 ( 182 of 3350 genes )	0.02205 ( 750 of 34011 annotated genes )	7.395e-33	3.461e-29	Rhebl1, Ino80, Ercc3, Zc3hav1, Tuba8, Myo9b, Tuba1b, Atp2a1, Gars, Atic, Ccr7, Gnb2l1, Hsp90aa1, Dnmt3a, Rab13, Atp2a2, Ak2, Mfn1, Atf7ip, Ldhd, Bves, Atad1, Oxa1l, Sipa1l1, Pde3b, Dnajc10, Flna, Pde1b, Rabgap1, Akt2, Gna13, Acap2, Pde2a, Tap1, Calcrl, Arhgap1, Tuba1a, Rab22a, Atp6v1g1, Tbc1d5, Bin1, Ahsa1, Agap2, Gnl2, Gnai2, Arl4a, Rhou, Rap2c, Abcc2, Arhgef10l, Mat2b, Rab9, Rhot1, Rab7, Gsk3b,…
GO:0032268	regulation of cellular pr	0.06925 ( 232 of 3350 genes )	0.03178 ( 1081 of 34011 annotated genes )	7.629e-33	3.571e-29	Mylip, Uhmk1, Ctcf, Ubxn1, Rara, Paip1, Lats1, Brd7, Smad7, Ccr7, Gnb2l1, Csnk1d, Tnrc6b, Map3k5, Aco1, Tnrc6a, Hcls1, Ttn, Rapgef4, Bmp5, Atg7, Eif5b, Ccnk, Dnajc10, Kat2b, Trp53, Eif3k, Apc, Lax1, Csk, Akt2, Stub1, Nipbl, Eif4g2, Pim1, Hmgcr, Araf, Bcl2, Kiss1r, Dusp7, Ppp1r9b, Lsm14a, Bcor, Tnk2, Itgb3, Il10, Ccl5, Map4k2, Lif, Hspa4, Agap2, Fnta, Ptprc, Gnai2, Barhl2, Rap2c, Ccdc88c, Samsn1, …
GO:0016192	vesicle-mediated transpor	0.05552 ( 186 of 3350 genes )	0.02282 ( 776 of 34011 annotated genes )	8.103e-33	3.793e-29	Rims4, Sec22b, Arl4c, Vps54, Ap3m1, Wasl, Rara, Vamp4, Pfn2, Elmo2, Ccr7, Adora3, Gnb2l1, Cltb, Ube3a, Rapgef4, Bves, Atad1, Stx5a, Ehd3, Adrbk1, Use1, Scfd1, Flna, Cog2, Cplx2, Sgip1, Copb1, Itsn1, Csk, Arcn1, Bcap31, Ap2b1, Calcrl, Lrba, Nrbp1, Rab22a, Uso1, Trak1, Picalm, Bin1, Tmed10, Tnk2, Rab8a, Cul3, Ccl5, Map4k2, Agap2, Cdc42se1, Abca7, Stxbp3a, Ergic3, Rab9, Coro1c, Rab7, Rab11fip3, Erc1…
GO:0045935	positive regulation of nu	0.07134 ( 239 of 3350 genes )	0.03322 ( 1130 of 34011 annotated genes )	8.535e-33	3.995e-29	Usf2, Stat5b, Ino80, Chek2, Ercc3, Ctcf, Sp3, Rara, Ets1, Brd7, Tcf20, Ywhah, Bcl11b, Pbx4, Cbfb, Ube3a, Snw1, Ddit3, Fos, Bmp5, Atf7ip, Rnf20, Nfatc1, Zfp292, Smarcc2, Kat2b, Safb, Cnbp, Trp53, Rnf168, Nfkb1, Arhgef11, Nr2c2, Rfx4, Akt2, Bclaf1, Prkdc, Calcrl, Nlrc5, Tcf7l1, Stat1, Mkl1, Nufip1, Hdac1, Tbl1x, Ilf2, Picalm, Strn3, Rbpj, Hmbox1, Asxl2, Il10, Tcfap2c, Lif, Agap2, Hmgn3, Ptprc, Paf1…
GO:0016569	covalent chromatin modifi	0.02955 ( 99 of 3350 genes )	0.00812 ( 276 of 34011 annotated genes )	8.557e-33	4.005e-29	Kdm3a, Prkcb, Ctcf, Brd7, Atxn7, Ehmt1, Wbp7, Ep400, Dnmt3a, Kdm5d, Ube2b, Setd7, Setd2, Rcor1, Mll5, Ezh1, Epc1, Rnf20, Pcgf1, Mysm1, Kdm2a, Ubr2, Kat2b, Trp53, Rnf168, Pkn1, Nipbl, Hcfc1, Brd4, Hdac1, Paxip1, Setd8, Bcor, Rag1, Brpf3, Paf1, Eed, Mgea5, Dnmt3b, Dtx3l, Setd1a, Uimc1, Baz1b, Usp22, Kat2a, Ldb1, Satb1, Foxp3, Brd8, Brd1, Cdc73, Ash2l, Crebbp, Csrp2bp, Ing4, Hdac4, Suv420h1, Kdm4c, …
GO:0044257	cellular protein cataboli	0.03284 ( 110 of 3350 genes )	0.00976 ( 332 of 34011 annotated genes )	1.022e-32	4.785e-29	Mylip, Chek2, Hspa5, Psmb10, Cul5, Trip12, Ubxn1, Rnf103, Usp28, Smad7, Psen1, Uspl1, Znrf1, Anapc2, Ubr3, Chfr, Gnb2l1, Csnk1d, Usp47, Ube2b, Kctd13, Ate1, Zranb1, Usp8, Ube3a, Hsp90b1, Usp37, Usp24, Rnf20, Ppt1, Ubr2, Dnajc10, Fbxl3, Usp7, Psmd10, Dnajc3, Herc4, Amfr, Stub1, Gpx1, Hectd1, Psmb1, Ubr1, Tbl1x, Ubr5, Uba7, Fbxo45, Lrrk2, Arih1, Psmb4, Cul3, Crbn, Cd2ap, Psmb9, Usp20, Usp19, Rnf4, …
GO:0051603	proteolysis involved in c	0.03224 ( 108 of 3350 genes )	0.00950 ( 323 of 34011 annotated genes )	1.533e-32	7.177e-29	Mylip, Hspa5, Psmb10, Cul5, Trip12, Ubxn1, Rnf103, Usp28, Smad7, Psen1, Uspl1, Znrf1, Anapc2, Ubr3, Chfr, Gnb2l1, Csnk1d, Usp47, Ube2b, Kctd13, Ate1, Zranb1, Usp8, Ube3a, Hsp90b1, Usp37, Usp24, Rnf20, Ubr2, Dnajc10, Fbxl3, Usp7, Psmd10, Dnajc3, Amfr, Herc4, Stub1, Gpx1, Hectd1, Psmb1, Ubr1, Tbl1x, Ubr5, Uba7, Fbxo45, Lrrk2, Arih1, Psmb4, Cul3, Crbn, Cd2ap, Psmb9, Usp20, Usp19, Rnf4, Usp26, 111001…
GO:0009207	purine ribonucleoside tri	0.03910 ( 131 of 3350 genes )	0.01314 ( 447 of 34011 annotated genes )	1.538e-32	7.198e-29	Rhebl1, Ino80, Ercc3, Tuba8, Myo9b, Tuba1b, Atp2a1, Ccr7, Gnb2l1, Hsp90aa1, Rab13, Atp2a2, Mfn1, Atf7ip, Bves, Atad1, Sipa1l1, Rabgap1, Akt2, Gna13, Acap2, Tap1, Arhgap1, Tuba1a, Rab22a, Atp6v1g1, Tbc1d5, Bin1, Agap2, Gnl2, Gnai2, Arl4a, Rhou, Rap2c, Abcc2, Arhgef10l, Rab9, Rhot1, Rab7, Gsk3b, Eftud1, Gnas, Arfgef1, Arhgap4, Top1, Ralgapa2, Rab21, Ngef, Acap1, Arrb2, Lsg1, Ccl11, Ndel1, Atp5a1, P…
GO:0009203	ribonucleoside triphospha	0.03910 ( 131 of 3350 genes )	0.01317 ( 448 of 34011 annotated genes )	1.973e-32	9.237e-29	Rhebl1, Ino80, Ercc3, Tuba8, Myo9b, Tuba1b, Atp2a1, Ccr7, Gnb2l1, Hsp90aa1, Rab13, Atp2a2, Mfn1, Atf7ip, Bves, Atad1, Sipa1l1, Rabgap1, Akt2, Gna13, Acap2, Tap1, Arhgap1, Tuba1a, Rab22a, Atp6v1g1, Tbc1d5, Bin1, Agap2, Gnl2, Gnai2, Arl4a, Rhou, Rap2c, Abcc2, Arhgef10l, Rab9, Rhot1, Rab7, Gsk3b, Eftud1, Gnas, Arfgef1, Arhgap4, Top1, Ralgapa2, Rab21, Ngef, Acap1, Arrb2, Lsg1, Ccl11, Ndel1, Atp5a1, P…
GO:0010557	positive regulation of ma	0.07104 ( 238 of 3350 genes )	0.03325 ( 1131 of 34011 annotated genes )	2.622e-32	1.227e-28	Usf2, Stat5b, Ino80, Chek2, Ercc3, Uhmk1, Ctcf, Sp3, Rara, Paip1, Ets1, Brd7, Tcf20, Ywhah, Bcl11b, Pbx4, Cbfb, Ube3a, Snw1, Ddit3, Fos, Bmp5, Atf7ip, Rnf20, Nfatc1, Zfp292, Smarcc2, Kat2b, Safb, Cnbp, Trp53, Nfkb1, Arhgef11, Nr2c2, Rfx4, Akt2, Prkdc, Nlrc5, Tcf7l1, Stat1, Mkl1, Nufip1, Hdac1, Tbl1x, Ilf2, Cd27, Picalm, Strn3, Rbpj, Hmbox1, Asxl2, Il10, Tcfap2c, Lif, Agap2, Hmgn3, Fnta, Paf1, Itg…
GO:0016570	histone modification	0.02896 ( 97 of 3350 genes )	0.00794 ( 270 of 34011 annotated genes )	3.192e-32	1.494e-28	Kdm3a, Prkcb, Ctcf, Brd7, Atxn7, Ehmt1, Wbp7, Ep400, Kdm5d, Ube2b, Setd7, Setd2, Rcor1, Mll5, Ezh1, Epc1, Rnf20, Pcgf1, Mysm1, Kdm2a, Ubr2, Kat2b, Trp53, Rnf168, Pkn1, Nipbl, Hcfc1, Brd4, Hdac1, Paxip1, Setd8, Bcor, Rag1, Brpf3, Paf1, Eed, Mgea5, Dnmt3b, Dtx3l, Setd1a, Uimc1, Baz1b, Usp22, Kat2a, Ldb1, Satb1, Foxp3, Brd8, Brd1, Cdc73, Ash2l, Crebbp, Csrp2bp, Ing4, Hdac4, Suv420h1, Kdm4c, Tgfb1, R…
GO:0009146	purine nucleoside triphos	0.03910 ( 131 of 3350 genes )	0.01323 ( 450 of 34011 annotated genes )	3.241e-32	1.517e-28	Rhebl1, Ino80, Ercc3, Tuba8, Myo9b, Tuba1b, Atp2a1, Ccr7, Gnb2l1, Hsp90aa1, Rab13, Atp2a2, Mfn1, Atf7ip, Bves, Atad1, Sipa1l1, Rabgap1, Akt2, Gna13, Acap2, Tap1, Arhgap1, Tuba1a, Rab22a, Atp6v1g1, Tbc1d5, Bin1, Agap2, Gnl2, Gnai2, Arl4a, Rhou, Rap2c, Abcc2, Arhgef10l, Rab9, Rhot1, Rab7, Gsk3b, Eftud1, Gnas, Arfgef1, Arhgap4, Top1, Ralgapa2, Rab21, Ngef, Acap1, Arrb2, Lsg1, Ccl11, Ndel1, Atp5a1, P…
GO:0033554	cellular response to stre	0.06090 ( 204 of 3350 genes )	0.02655 ( 903 of 34011 annotated genes )	4.114e-32	1.926e-28	Uaca, Rfwd3, Ino80, Chek2, Ercc3, Mapkapk2, Atp2a1, Fgf12, Smc1a, Mapk10, Ccr7, Atg13, Map3k5, Tnrc6a, Ddit3, Npepps, Fos, Atg7, Nsmce2, Dnajc10, Trp53, Rnf168, Atrx, Apc, Rps3, Rad54l, Akt2, Bclaf1, Stub1, Prkdc, Nipbl, Hmgcr, Xrn2, Zmynd11, Rtn4, Bcl2, Park7, Hdac1, Gpx3, Cd27, Ubr5, Fbxo45, Apitd1, Zfp110, Smg1, 5730403B10Rik, Setd8, Supt16h, Casp2, Ntrk3, Map4k2, Fxn, Cdc42se1, Larp1, Dtx3l, …
GO:0009154	purine ribonucleotide cat	0.03910 ( 131 of 3350 genes )	0.01329 ( 452 of 34011 annotated genes )	5.304e-32	2.483e-28	Rhebl1, Ino80, Ercc3, Tuba8, Myo9b, Tuba1b, Atp2a1, Ccr7, Gnb2l1, Hsp90aa1, Rab13, Atp2a2, Mfn1, Atf7ip, Bves, Atad1, Sipa1l1, Rabgap1, Akt2, Gna13, Acap2, Tap1, Arhgap1, Tuba1a, Rab22a, Atp6v1g1, Tbc1d5, Bin1, Agap2, Gnl2, Gnai2, Arl4a, Rhou, Rap2c, Abcc2, Arhgef10l, Rab9, Rhot1, Rab7, Gsk3b, Eftud1, Gnas, Arfgef1, Arhgap4, Top1, Ralgapa2, Rab21, Ngef, Acap1, Arrb2, Lsg1, Ccl11, Ndel1, Atp5a1, P…
GO:0010628	positive regulation of ge	0.06896 ( 231 of 3350 genes )	0.03202 ( 1089 of 34011 annotated genes )	6.55e-32	3.066e-28	Usf2, Stat5b, Ino80, Chek2, Ercc3, Ctcf, Sp3, Rara, Ets1, Brd7, Tcf20, Ywhah, Bcl11b, Pbx4, Cbfb, Ube3a, Snw1, Ddit3, Fos, Bmp5, Atf7ip, Rnf20, Nfatc1, Zfp292, Smarcc2, Kat2b, Safb, Cnbp, Trp53, Nfkb1, Arhgef11, Nr2c2, Rfx4, Akt2, Pde2a, Prkdc, Nlrc5, Tcf7l1, Stat1, Hcfc1, Mkl1, Nufip1, Hdac1, Tbl1x, Ilf2, Picalm, Strn3, Rbpj, Hmbox1, Asxl2, Il10, Ccl5, Tcfap2c, Lif, Hspa4, Agap2, Hmgn3, Paf1, It…
GO:0002682	regulation of immune syst	0.05015 ( 168 of 3350 genes )	0.01982 ( 674 of 34011 annotated genes )	7.04e-32	3.295e-28	Stat5b, Phpt1, Zc3hav1, Cd247, Trpm4, Prkcb, Rara, Mapkapk2, Ets1, Nfkbid, Ccr7, Adora3, Hsp90aa1, Rcor1, Lgals8, Lgals1, H2-T23, Il12rb1, Trp53, Itk, Apc, Sell, Lax1, Csk, H2-K1, Tap1, Ubash3a, Rnf31, Nlrc5, Bcl2, Pycard, Cd27, Psmb4, Itgb3, Il10, Ccl5, Lif, Ptprc, Paf1, Il20rb, Ifnb1, Samsn1, Inpp5d, Tlr2, Rela, Skap1, Zeb1, Foxp1, Cdc73, Gnas, 2010106G01Rik, Ptpn22, Cd5, Hsph1, Sit1, C4bp, Arr…
GO:0006163	purine nucleotide metabol	0.05164 ( 173 of 3350 genes )	0.02079 ( 707 of 34011 annotated genes )	9.544e-32	4.467e-28	Rhebl1, Ino80, Ercc3, Zc3hav1, Tuba8, Myo9b, Tuba1b, Atp2a1, Atic, Ccr7, Gnb2l1, Hsp90aa1, Rab13, Atp2a2, Ak2, Mfn1, Atf7ip, Ldhd, Bves, Atad1, Oxa1l, Sipa1l1, Pde3b, Dnajc10, Flna, Pde1b, Rabgap1, Akt2, Gna13, Acap2, Pde2a, Tap1, Calcrl, Arhgap1, Tuba1a, Rab22a, Atp6v1g1, Tbc1d5, Bin1, Ahsa1, Agap2, Gnl2, Gnai2, Arl4a, Rhou, Rap2c, Abcc2, Arhgef10l, Rab9, Rhot1, Rab7, Gsk3b, Eftud1, Gnas, Arfgef…
GO:0032501	multicellular organismal	0.24149 ( 809 of 3350 genes )	0.17218 ( 5856 of 34011 annotated genes )	1.1e-31	5.149e-28	Mylip, Hrh1, Rims4, Rara, Mapkapk2, Aff3, Ccl21a, Bcl11b, Dnmt3a, Rttn, Gpi1, Rcor1, Gad2, Zfr, Ttn, Bves, Atad1, Ambra1, Rnf17, Adrbk1, Pde3b, Flna, Tspo, Duox1, Akt2, Zhx2, Ap2b1, Alox5, Psd4, Bcl2, Gpsm2, Park7, Picalm, Rbpj, Itgb3, Olfm1, Lif, Grid2ip, Kcnq2, Vdac3, Stxbp3a, Reck, Chrnd, Inpp5d, Rela, Pgm3, Ncor2, Itga4, Clgn, Zeb1, Gsk3b, Dkk3, Chuk, Cdc73, Prdx3, Ptpn22, Ilk, Tnik, Copa, Tx…
GO:0009143	nucleoside triphosphate c	0.03910 ( 131 of 3350 genes )	0.01341 ( 456 of 34011 annotated genes )	1.405e-31	6.577e-28	Rhebl1, Ino80, Ercc3, Tuba8, Myo9b, Tuba1b, Atp2a1, Ccr7, Gnb2l1, Hsp90aa1, Rab13, Atp2a2, Mfn1, Atf7ip, Bves, Atad1, Sipa1l1, Rabgap1, Akt2, Gna13, Acap2, Tap1, Arhgap1, Tuba1a, Rab22a, Atp6v1g1, Tbc1d5, Bin1, Agap2, Gnl2, Gnai2, Arl4a, Rhou, Rap2c, Abcc2, Arhgef10l, Rab9, Rhot1, Rab7, Gsk3b, Eftud1, Gnas, Arfgef1, Arhgap4, Top1, Ralgapa2, Rab21, Ngef, Acap1, Arrb2, Lsg1, Ccl11, Ndel1, Atp5a1, P…
GO:0009261	ribonucleotide catabolic	0.03910 ( 131 of 3350 genes )	0.01341 ( 456 of 34011 annotated genes )	1.405e-31	6.577e-28	Rhebl1, Ino80, Ercc3, Tuba8, Myo9b, Tuba1b, Atp2a1, Ccr7, Gnb2l1, Hsp90aa1, Rab13, Atp2a2, Mfn1, Atf7ip, Bves, Atad1, Sipa1l1, Rabgap1, Akt2, Gna13, Acap2, Tap1, Arhgap1, Tuba1a, Rab22a, Atp6v1g1, Tbc1d5, Bin1, Agap2, Gnl2, Gnai2, Arl4a, Rhou, Rap2c, Abcc2, Arhgef10l, Rab9, Rhot1, Rab7, Gsk3b, Eftud1, Gnas, Arfgef1, Arhgap4, Top1, Ralgapa2, Rab21, Ngef, Acap1, Arrb2, Lsg1, Ccl11, Ndel1, Atp5a1, P…
GO:0010646	regulation of cell commun	0.07791 ( 261 of 3350 genes )	0.03861 ( 1313 of 34011 annotated genes )	3.534e-31	1.654e-27	Rims4, Prkcb, Rara, Smad7, Pfn2, Slc20a1, Ube3a, Ddit3, Bmp5, Atad1, Cacna2d2, Adrbk1, Sipa1l1, Pde3b, Ubr2, Flna, Apc, Akt2, Ubash3a, Hmgcr, Nlrc5, Rtn4, Ubr5, Strn3, Rbpj, Asxl2, Rab8a, Lancl2, Itgb3, Ccl5, Map4k2, Lif, Grid2ip, Hmgn3, Gnai2, Cdc42se1, Inpp5d, Tlr2, Rela, Igf1r, Igbp1, Gsk3b, Chuk, Dkk3, Cdc73, Scyl2, Ptpn22, Ilk, Numb, Kcp, Arrb2, Tgfb1, Sox17, Cbl, Med12, Trim24, Rasa3, Vegfa…
GO:0008380	RNA splicing	0.02687 ( 90 of 3350 genes )	0.00714 ( 243 of 34011 annotated genes )	3.72e-31	1.742e-27	Hnrnph1, Dhx38, Cdk13, Ptbp2, Dhx15, Strap, Clk1, Snrpg, Cdc5l, Srrm1, Sugp1, Ddx46, Snrnp200, Prmt5, Hnrnpa1, Ddx39, Snw1, Sfswap, Rbmy1a1, Hnrnpu, Sf3a2, Bcas2, Luc7l3, Snrnp70, Cwc15, Sf3a3, Mbnl3, Thoc1, Hnrnpm, Celf1, U2af2, Hnrnpf, Akt2, 0610009D07Rik, Mbnl1, Isy1, Clk4, Srsf10, Prpf31, Rbm25, Pabpc1, Rbm5, Snrpd3, Zrsr2, Tra2a, D11Bwg0517e, U2af1l4, Aqr, Thoc5, Celf2, Snrpd2, Prpf39, Prpf4…
GO:0051254	positive regulation of RN	0.06507 ( 218 of 3350 genes )	0.02984 ( 1015 of 34011 annotated genes )	6.046e-31	2.83e-27	Usf2, Stat5b, Ino80, Chek2, Ercc3, Ctcf, Sp3, Rara, Ets1, Brd7, Tcf20, Ywhah, Bcl11b, Pbx4, Cbfb, Ube3a, Snw1, Ddit3, Fos, Bmp5, Atf7ip, Rnf20, Nfatc1, Zfp292, Smarcc2, Kat2b, Safb, Cnbp, Trp53, Nfkb1, Arhgef11, Nr2c2, Rfx4, Akt2, Bclaf1, Prkdc, Nlrc5, Tcf7l1, Stat1, Mkl1, Nufip1, Hdac1, Tbl1x, Ilf2, Picalm, Strn3, Rbpj, Hmbox1, Asxl2, Il10, Tcfap2c, Lif, Agap2, Hmgn3, Paf1, Itga6, Rps6ka1, Barhl…
GO:0070647	protein modification by s	0.03851 ( 129 of 3350 genes )	0.01332 ( 453 of 34011 annotated genes )	1.058e-30	4.954e-27	Rfwd3, Mylip, Otud5, Trpm4, Ubxn1, Smad7, Birc6, Anapc2, Zranb1, Ube3a, Cdc23, Atg7, Rnf20, Ube2h, Ubr2, Cops2, Fbxl3, Rnf168, Pja2, Stub1, Rnf31, Bcl2, Ubr5, Fbxo45, Bcor, Rag1, Cul3, Paf1, Rnf4, Usp26, 1110018G07Rik, Dtx3l, Uimc1, Usp22, Kat2a, Nedd8, Cdc73, Rnf167, Arrb2, Pten, Hdac4, Cbl, Trim24, Trim21, Os9, Ube2k, Rbbp6, Brca1, Wac, Lnx1, Cul1, Fkbp1a, Herc3, Leo1, Usp3, Huwe1, Stambp, Cdc1…
GO:0045893	positive regulation of tr	0.06388 ( 214 of 3350 genes )	0.02923 ( 994 of 34011 annotated genes )	1.535e-30	7.186e-27	Usf2, Stat5b, Ino80, Chek2, Ercc3, Ctcf, Sp3, Rara, Ets1, Brd7, Tcf20, Ywhah, Bcl11b, Pbx4, Cbfb, Ube3a, Snw1, Ddit3, Fos, Bmp5, Atf7ip, Rnf20, Nfatc1, Zfp292, Smarcc2, Kat2b, Safb, Cnbp, Trp53, Nfkb1, Arhgef11, Nr2c2, Rfx4, Akt2, Prkdc, Nlrc5, Tcf7l1, Stat1, Mkl1, Nufip1, Hdac1, Tbl1x, Ilf2, Picalm, Strn3, Rbpj, Hmbox1, Asxl2, Il10, Tcfap2c, Lif, Agap2, Hmgn3, Paf1, Itga6, Rps6ka1, Barhl2, Rnf4,…
GO:0051172	negative regulation of ni	0.06030 ( 202 of 3350 genes )	0.02687 ( 914 of 34011 annotated genes )	1.886e-30	8.829e-27	Cbx3, Ptbp2, Ctcf, Sp3, Rara, Brd7, Smad7, Smc1a, Zfp386, Dnmt3a, Snw1, Sfswap, Rcor1, Ezh1, Atf7ip, Zfp217, Pds5a, Mina, Ubr2, Cops2, Smarcc2, Tspo, Trp53, Nfkb1, Ubtf, Rps3, Akt2, Zhx2, Pde2a, Bclaf1, Nipbl, Foxn3, Zbtb20, Tcf7l1, Hdac1, Tbl1x, Whsc2, Strn3, Rbpj, Per1, Hmbox1, Zhx1, Setd8, Bcor, Lancl2, Il10, Ccl5, Arid4a, Paf1, Hes2, Ifnb1, Hivep1, Uimc1, Terf1, Rela, Ncor2, Creb1, Zeb1, Nab1…
GO:0045934	negative regulation of nu	0.05940 ( 199 of 3350 genes )	0.02652 ( 902 of 34011 annotated genes )	6.627e-30	3.102e-26	Cbx3, Ptbp2, Ctcf, Sp3, Rara, Brd7, Smad7, Smc1a, Zfp386, Dnmt3a, Snw1, Sfswap, Rcor1, Ezh1, Atf7ip, Zfp217, Pds5a, Mina, Ubr2, Cops2, Smarcc2, Trp53, Nfkb1, Ubtf, Rps3, Akt2, Zhx2, Pde2a, Bclaf1, Nipbl, Foxn3, Zbtb20, Tcf7l1, Hdac1, Tbl1x, Whsc2, Strn3, Rbpj, Per1, Hmbox1, Zhx1, Setd8, Bcor, Lancl2, Ccl5, Arid4a, Paf1, Hes2, Ifnb1, Hivep1, Uimc1, Terf1, Rela, Ncor2, Creb1, Zeb1, Nab1, Igbp1, Gsk…
GO:0044282	small molecule catabolic	0.05284 ( 177 of 3350 genes )	0.02235 ( 760 of 34011 annotated genes )	1.193e-29	5.585e-26	Rhebl1, Ino80, Ercc3, Zc3hav1, Tuba8, Myo9b, Tuba1b, Atp2a1, Hsd11b1, Ccr7, Pdpr, Gnb2l1, Hsp90aa1, Rab13, Atp2a2, Gpi1, Gad2, Mfn1, Atf7ip, Bves, Atad1, Oxa1l, Sipa1l1, Pde3b, Ido2, Dnajc10, Pde1b, Rabgap1, Akt2, Gna13, Acap2, Pde2a, Tap1, Arhgap1, Tuba1a, Rab22a, Atp6v1g1, Tbc1d5, Bin1, Ahsa1, Agap2, Gnl2, Gnai2, Arl4a, Rhou, Rap2c, Pgam1, Abcc2, Arhgef10l, Rab9, Rhot1, Rab7, Gsk3b, Eftud1, Gna…
GO:0023052	signaling	0.21224 ( 711 of 3350 genes )	0.14883 ( 5062 of 34011 annotated genes )	1.743e-29	8.16e-26	Uaca, Hrh1, Rims4, Prkacb, Cd247, Arhgef3, Rara, Mapkapk2, Brd7, Smc1a, Gpr133, Rassf2, Gad2, Ttn, Bves, Atad1, Adrbk1, Pde3b, Mapk6, Gpr174, Flna, Rabgap1, Duox1, Akt2, Ap2b1, Arhgdia, Psd4, Nlrc5, Bcl2, Araf, Gpsm2, Park7, Dusp7, Ubr5, Rbpj, Lancl2, Itgb3, Lif, Grid2ip, Hmgn3, Cdc42se1, Arl4a, Pea15a, Kcnq2, Vdac3, Stxbp3a, Gpr45, Ccdc88c, Inpp5d, Rhot1, Rela, Itga4, Zeb1, Gsk3b, Dkk3, Chuk, Cd…
GO:0034621	cellular macromolecular c	0.04090 ( 137 of 3350 genes )	0.01508 ( 513 of 34011 annotated genes )	2.099e-29	9.825e-26	Ict1, Tuba8, Ptbp2, Ctcf, Wasl, Tuba1b, Lats1, Pfn2, Hsp90aa1, Ttn, Atf7ip, Dync1h1, Oxa1l, Smarcc2, Flna, Apc, Hjurp, Ap2b1, Stub1, Rps6, Nap1l4, Tuba1a, Lrrc50, Rpsa, Nufip1, Evl, Picalm, H2-Ke2, Clip1, Lsm14a, Wdr19, Ccl5, Tmem48, Hspa4, Rnf4, Eif3d, Zrsr2, Terf1, Pum2, Vasp, Creb1, Ssh2, Eftud1, Arfgef1, Celf2, H2afz, Nasp, Etf1, Prkcd, Ccl11, Tgfb1, Rpl24, Npm1, Nat15, Actr3, Add1, Hist3h2a,…
GO:0009890	negative regulation of bi	0.06209 ( 208 of 3350 genes )	0.02855 ( 971 of 34011 annotated genes )	2.143e-29	1.003e-25	Hrh1, Cbx3, Ctcf, Sp3, Rara, Brd7, Smad7, Smc1a, Zfp386, Gnb2l1, Dnmt3a, Snw1, Rcor1, Tnrc6a, Ezh1, Atf7ip, Bmp5, Zfp217, Pds5a, Mina, Ubr2, Cops2, Smarcc2, Tspo, Trp53, Nfkb1, Ubtf, Zhx2, Pde2a, Bclaf1, Nipbl, Foxn3, Zbtb20, Tcf7l1, Hdac1, Tbl1x, Whsc2, Strn3, Rbpj, Per1, Hmbox1, Zhx1, Setd8, Bcor, Lancl2, Itgb3, Il10, Arid4a, Fnta, Paf1, Hes2, Hivep1, Inpp5d, Uimc1, Terf1, Rela, Ncor2, Creb1, Z…
GO:0050793	regulation of development	0.07731 ( 259 of 3350 genes )	0.03931 ( 1337 of 34011 annotated genes )	4.037e-29	1.89e-25	Stat5b, Prkcb, Rara, Ets1, Smc1a, Bcl11b, Krit1, Hsp90aa1, Rcor1, Ddit3, Sipa1l1, Pde3b, Tspo, Apc, Zhx2, Adamts9, Hmgcr, Rtn4, Bcl2, Larp4, Rbpj, Asxl2, Bcor, Itgb3, Ccl5, Ntrk3, Lif, Paf1, Ifnb1, Rufy3, Inpp5d, Med15, Rela, Ncor2, Zeb1, Gsk3b, Ssh2, Smc3, Cdc73, Ngef, Ilk, Clic1, Tnik, Tshz3, Numb, Hdac4, Apob, Tgfb1, Sox17, Ndel1, Setd3, Med12, Zbtb7b, Actr3, Bax, Add1, Vegfa, Foxo4, Caprin1, …
GO:0010558	negative regulation of ma	0.05940 ( 199 of 3350 genes )	0.02723 ( 926 of 34011 annotated genes )	2.401e-28	1.124e-24	Cbx3, Ctcf, Sp3, Rara, Brd7, Smad7, Smc1a, Zfp386, Gnb2l1, Dnmt3a, Snw1, Rcor1, Tnrc6a, Ezh1, Atf7ip, Zfp217, Pds5a, Mina, Ubr2, Cops2, Smarcc2, Trp53, Nfkb1, Ubtf, Zhx2, Pde2a, Bclaf1, Nipbl, Foxn3, Zbtb20, Tcf7l1, Hdac1, Tbl1x, Strn3, Rbpj, Per1, Hmbox1, Zhx1, Setd8, Bcor, Lancl2, Itgb3, Il10, Arid4a, Fnta, Paf1, Hes2, Hivep1, Inpp5d, Uimc1, Terf1, Rela, Ncor2, Creb1, Zeb1, Nab1, Igbp1, Gsk3b, …
GO:0031327	negative regulation of ce	0.06060 ( 203 of 3350 genes )	0.02805 ( 954 of 34011 annotated genes )	2.608e-28	1.221e-24	Cbx3, Ctcf, Sp3, Rara, Brd7, Smad7, Smc1a, Zfp386, Gnb2l1, Dnmt3a, Snw1, Rcor1, Tnrc6a, Ezh1, Atf7ip, Bmp5, Zfp217, Pds5a, Mina, Ubr2, Cops2, Smarcc2, Tspo, Trp53, Nfkb1, Ubtf, Zhx2, Pde2a, Bclaf1, Nipbl, Foxn3, Zbtb20, Tcf7l1, Hdac1, Tbl1x, Whsc2, Strn3, Rbpj, Per1, Hmbox1, Zhx1, Setd8, Bcor, Lancl2, Il10, Arid4a, Paf1, Hes2, Hivep1, Inpp5d, Uimc1, Terf1, Rela, Ncor2, Creb1, Zeb1, Nab1, Igbp1, G…
GO:0032879	regulation of localizatio	0.07701 ( 258 of 3350 genes )	0.03960 ( 1347 of 34011 annotated genes )	3.146e-28	1.473e-24	Uaca, Stat5b, Rims4, Uhmk1, Prkcb, Plcd1, Ets1, Vamp4, Pfn2, Krit1, Gnb2l1, Hsp90aa1, Clcn1, Atad1, Rnf20, Cacna2d2, Adrbk1, Pde3b, Flna, Tspo, Apc, Akt2, Gna13, Pde2a, Arhgdia, Hmgcr, Rtn4, Lrrc50, Bcl2, Park7, Pycard, Ubr5, Picalm, Rab8a, Kcnj12, Itgb3, Ccl5, Lif, Hmgn3, Pea15a, Kcnq2, Vdac3, Stxbp3a, Hcn1, Tlr2, Igf1r, Gsk3b, Map2k2, Scyl2, Ilk, Clic1, Arrb2, Tnnc1, Apob, Tgfb1, Cacna1c, Bax, …
GO:0048584	positive regulation of re	0.05940 ( 199 of 3350 genes )	0.02729 ( 928 of 34011 annotated genes )	3.212e-28	1.504e-24	Stat5b, Phpt1, Zc3hav1, Cd247, Trpm4, Prkcb, Mapkapk2, Ccl21a, Slc20a1, Ccr7, Adora3, Csnk1d, Zranb1, Ube3a, Hcls1, Bmp5, Atg7, Lgals1, H2-T23, Il12rb1, Flna, Itk, Rnf168, Nfkb1, Sell, Lax1, Itsn1, Nr2c2, Csk, Akt2, Pde2a, H2-K1, Tap1, Ubash3a, Rnf31, Hmgcr, Nlrc5, Klk6, Lgals9, Bcl2, Pycard, Cd27, Ubr5, Rbpj, Npy5r, Asxl2, Lancl2, Itgb3, Ccl5, Ntrk3, Map4k2, Lif, Agap2, Ptprc, Larp1, Uimc1, Tlr2…
GO:0048513	organ development	0.11045 ( 370 of 3350 genes )	0.06501 ( 2211 of 34011 annotated genes )	4.833e-28	2.262e-24	Usf2, Stat5b, Pcdh12, Man1a2, Plcd1, Rara, Mapkapk2, Ets1, Smad7, Nsdhl, Birc6, Cd164, Ccl21a, Bcl11b, Oas1d, Hsp90aa1, Trp53bp2, Ube3a, Rcor1, Lgals8, Ttn, Bmp5, Cacna2d2, Adrbk1, Pde3b, Flna, Itk, Apc, Hmgcr, Rtn4, Krt9, Bcl2, Gpsm2, Ubn1, Picalm, Mtap7, Rbpj, Bcor, Itgb3, Ccl5, Lif, Paf1, Stxbp3a, Zbtb32, Ifnb1, Hcn1, Chrnd, Inpp5d, Rela, Pgm3, Ncor2, Itga4, Igf1r, Zeb1, Gsk3b, Chuk, Tctn1, Cd…
GO:0019941	modification-dependent pr	0.02836 ( 95 of 3350 genes )	0.00853 ( 290 of 34011 annotated genes )	5.248e-28	2.456e-24	Mylip, Cul5, Trip12, Ubxn1, Rnf103, Usp28, Smad7, Psen1, Uspl1, Znrf1, Anapc2, Ubr3, Chfr, Gnb2l1, Csnk1d, Usp47, Ube2b, Kctd13, Ate1, Zranb1, Usp8, Ube3a, Hsp90b1, Usp37, Usp24, Rnf20, Ubr2, Dnajc10, Fbxl3, Usp7, Psmd10, Amfr, Herc4, Stub1, Hectd1, Ubr1, Tbl1x, Ubr5, Uba7, Fbxo45, Lrrk2, Arih1, Cul3, Crbn, Cd2ap, Usp20, Usp19, Rnf4, Usp26, 1110018G07Rik, Derl2, Ppp2r5c, Mad2l1, Klhl20, Rad23b, E…
GO:0051253	negative regulation of RN	0.05493 ( 184 of 3350 genes )	0.02446 ( 832 of 34011 annotated genes )	7.527e-28	3.523e-24	Cbx3, Ptbp2, Ctcf, Sp3, Rara, Brd7, Smad7, Zfp386, Dnmt3a, Snw1, Sfswap, Rcor1, Ezh1, Atf7ip, Zfp217, Mina, Ubr2, Cops2, Smarcc2, Trp53, Nfkb1, Ubtf, Akt2, Zhx2, Pde2a, Bclaf1, Nipbl, Foxn3, Zbtb20, Tcf7l1, Hdac1, Tbl1x, Whsc2, Strn3, Rbpj, Per1, Hmbox1, Zhx1, Setd8, Bcor, Lancl2, Arid4a, Paf1, Hes2, Hivep1, Uimc1, Rela, Ncor2, Creb1, Zeb1, Nab1, Igbp1, Gsk3b, Dkk3, Foxp1, Cdc73, Pdcd4, Ing4, Tsh…
GO:0006508	proteolysis	0.05970 ( 200 of 3350 genes )	0.02770 ( 942 of 34011 annotated genes )	8.974e-28	4.201e-24	Sec11a, Mylip, Psmb10, Otud5, Adam12, Ubxn1, Smad7, Adamts13, Anapc2, Gnb2l1, Csnk1d, Senp7, Psma2, Mmp7, Zranb1, Ube3a, Cndp1, Npepps, Usp24, Rnf20, Lta4h, Ubr2, Dnajc10, Tmprss15, Fbxl3, Spcs2, Adam7, Uqcrc1, Adamts9, Stub1, Klk6, Ctrb1, Park7, Tbl1x, Ubr5, Fbxo45, Erap1, Psmb4, Il10, Cul3, Casp2, Psmd8, Psmb9, Dpp10, Rnf4, Usp26, 1110018G07Rik, Ppp2r5c, Rad23b, Pppde2, Edem3, Usp22, Rab7, 2010…
GO:0034622	cellular macromolecular c	0.03642 ( 122 of 3350 genes )	0.01300 ( 442 of 34011 annotated genes )	9.83e-28	4.602e-24	Tmsb10, Tuba8, Ptbp2, Wasl, Tuba1b, Lats1, Rps25, Pfn2, Brd2, Hsp90aa1, Prmt5, Ttn, Atf7ip, Senp6, Dync1h1, Patl1, Oxa1l, Cct2, Flna, Clec2i, Celf1, Psmd10, Apc, Dnm1l, Rps2, Hjurp, Ap2b1, Mbnl1, Stxbp1, Stub1, Rps6, Nap1l4, Tuba1a, Calr, Tbcd, Lrrc50, Rpsa, Smad4, Nufip1, Evl, Picalm, H2-Ke2, Clip1, Dlg1, Lsm14a, Diap1, Wdr19, Srsf10, Cand1, Prpf31, Ccl5, Tmem48, Hspa4, Coro1a, Dlg2, Cyba, Rbm5,…
GO:0042221	response to chemical stim	0.10866 ( 364 of 3350 genes )	0.06392 ( 2174 of 34011 annotated genes )	1.259e-27	5.895e-24	Usf2, Stat5b, Mylip, Hrh1, Otud5, Myo9b, Prkcb, Plcd1, Rara, Mapkapk2, Aff3, Ets1, Sva, Dgkd, Ccl21a, Bcl11b, Trpm6, Tgtp1, Hsp90aa1, Dnmt3a, Atox1, Mmp7, Aco1, Ddit3, Ttn, Adrbk1, Ubr2, Il12rb1, Pde1b, Rad54l, Duox1, Akt2, Pde2a, Stub1, Hmgcr, Nlrc5, Ctrb1, Bcl2, Gsta1, Park7, Pycard, Tbl1x, Gpx3, Evl, Strn3, Ppp1r9b, Mtap7, Calm1, Lancl2, Ccl5, Hmgn3, Paf1, Stxbp3a, Rnf4, Ifnb1, Abcc2, Tlr2, Re…
GO:0043632	modification-dependent ma	0.02836 ( 95 of 3350 genes )	0.00861 ( 293 of 34011 annotated genes )	1.278e-27	5.983e-24	Mylip, Cul5, Trip12, Ubxn1, Rnf103, Usp28, Smad7, Psen1, Uspl1, Znrf1, Anapc2, Ubr3, Chfr, Gnb2l1, Csnk1d, Usp47, Ube2b, Kctd13, Ate1, Zranb1, Usp8, Ube3a, Hsp90b1, Usp37, Usp24, Rnf20, Ubr2, Dnajc10, Fbxl3, Usp7, Psmd10, Amfr, Herc4, Stub1, Hectd1, Ubr1, Tbl1x, Ubr5, Uba7, Fbxo45, Lrrk2, Arih1, Cul3, Crbn, Cd2ap, Usp20, Usp19, Rnf4, Usp26, 1110018G07Rik, Derl2, Ppp2r5c, Mad2l1, Klhl20, Rad23b, E…
GO:0006511	ubiquitin-dependent prote	0.02776 ( 93 of 3350 genes )	0.00835 ( 284 of 34011 annotated genes )	1.97e-27	9.221e-24	Mylip, Cul5, Trip12, Ubxn1, Rnf103, Usp28, Smad7, Psen1, Uspl1, Znrf1, Anapc2, Ubr3, Chfr, Gnb2l1, Csnk1d, Usp47, Ube2b, Kctd13, Ate1, Zranb1, Usp8, Ube3a, Hsp90b1, Usp37, Usp24, Rnf20, Ubr2, Dnajc10, Fbxl3, Usp7, Psmd10, Amfr, Herc4, Stub1, Hectd1, Ubr1, Tbl1x, Ubr5, Fbxo45, Lrrk2, Arih1, Cul3, Crbn, Cd2ap, Usp20, Usp19, Rnf4, Usp26, 1110018G07Rik, Derl2, Ppp2r5c, Mad2l1, Klhl20, Rad23b, Edem3, …
GO:2000113	negative regulation of ce	0.05731 ( 192 of 3350 genes )	0.02646 ( 900 of 34011 annotated genes )	5.764e-27	2.698e-23	Cbx3, Ctcf, Sp3, Rara, Brd7, Smad7, Smc1a, Zfp386, Gnb2l1, Dnmt3a, Snw1, Rcor1, Tnrc6a, Ezh1, Atf7ip, Zfp217, Pds5a, Mina, Ubr2, Cops2, Smarcc2, Trp53, Nfkb1, Ubtf, Zhx2, Pde2a, Bclaf1, Nipbl, Foxn3, Zbtb20, Tcf7l1, Hdac1, Tbl1x, Strn3, Rbpj, Per1, Hmbox1, Zhx1, Setd8, Bcor, Lancl2, Arid4a, Paf1, Hes2, Hivep1, Uimc1, Terf1, Rela, Ncor2, Creb1, Zeb1, Nab1, Igbp1, Gsk3b, Dkk3, Foxp1, Smc3, Cdc73, E…
GO:0071822	protein complex subunit o	0.05164 ( 173 of 3350 genes )	0.02279 ( 775 of 34011 annotated genes )	9.886e-27	4.628e-23	Ict1, Tuba8, Wasl, Tuba1b, Lats1, Pfn2, Dgkd, Gnb2l1, Hsp90aa1, Ttn, Atf7ip, Crtc3, Oxa1l, Ehd3, Hgsnat, Flna, Trp53, Apc, Hjurp, Ap2b1, Bclaf1, Stub1, Hmgcr, Tuba1a, Hcfc1, Lrrc50, Gpx3, Evl, Picalm, H2-Ke2, Clip1, Tmed10, Wdr19, Ccl5, Tmem48, Olfm1, Hspa4, Stxbp3a, Rnf4, Gabra6, Ccdc88c, Terf1, Vasp, Creb1, Igf1r, Clgn, Gsk3b, Arfgef1, Ilk, Etf1, Prkcd, Ccl11, Tgfb1, Npm1, Actr3, Trim21, Ggn, B…
GO:0000278	mitotic cell cycle	0.04000 ( 134 of 3350 genes )	0.01549 ( 527 of 34011 annotated genes )	1.538e-26	7.2e-23	Stat5b, Rfwd3, Ino80, Chek2, Csnk1a1, Kif2a, Lats1, Brd7, Birc6, Ywhah, Smc1a, Anapc2, Wee2, Vrk1, Bub3, Anp32b, Cep192, Cdc23, Pds5a, Nfatc1, Ccnk, Nsmce2, Flna, Trp53, Sgol1, Apc, Ckap5, Nipbl, Rps6, Pim1, Bcl2, Gpsm2, Arl8b, Apitd1, Setd8, Cul3, Casp2, Paf1, Rhou, Ppp2r5c, Terf1, Usp22, 4922501C03Rik, Smc3, Cdc73, Pds5b, Nek9, Ppp1r12a, Pten, Rad21, Tgfb1, 6720463M24Rik, Rpl24, Pafah1b1, Pttg1…
GO:0071843	cellular component biogen	0.02358 ( 79 of 3350 genes )	0.00647 ( 220 of 34011 annotated genes )	1.748e-26	8.183e-23	Rps24, Dis3, Ptbp2, Rps18, Rps25, Ddx56, Nob1, Rrp1b, Rplp0, Prmt5, Nhp2, Rpl7, Rps7, Dync1h1, Exosc1, Patl1, Oxa1l, Mina, Utp6, Celf1, Rps19, Rps2, Mbnl1, Rpl5, Aatf, Rps6, Rps28, Rrn3, Ebna1bp2, Rpsa, Mphosph10, Nufip1, Lsm14a, Tsr1, Nop10, Srsf10, Rps21, Prpf31, Gnl2, Rbm5, Eif3d, Zrsr2, Rrp36, Eri1, Pum2, Eftud1, Spnb2, Rps16, Rrp1, Celf2, Mrto4, Fbl, Lsg1, Pten, Nop58, Rpl11, Npm1, Rpl24, No…
GO:0045595	regulation of cell differ	0.06060 ( 203 of 3350 genes )	0.02896 ( 985 of 34011 annotated genes )	1.938e-26	9.071e-23	Stat5b, Rara, Frzb, Ets1, Nfkbid, Ywhah, Smc1a, Bcl11b, Anapc2, Wee2, Ccr7, Hsp90aa1, 2400003C14Rik, Sez6, Snw1, Rcor1, Rapgef4, Lgals1, Sipa1l1, Rock1, Mbnl3, Tspo, Trp53, Apc, Zhx2, Adamts9, Nipbl, Tcf7l1, Rtn4, Klk6, Bcl2, Hdac1, Cd27, Rbpj, Asxl2, Itgb3, Ccl5, Tcfap2c, Ntrk3, Lif, Fxn, Ptprc, Paf1, Sema3a, Barhl2, Ifnb1, Rufy3, Inpp5d, Med15, Rela, Ncor2, Creb1, Zeb1, Gsk3b, Ssh2, Smc3, Nrcam…
GO:0051726	regulation of cell cycle	0.04179 ( 140 of 3350 genes )	0.01664 ( 566 of 34011 annotated genes )	2.168e-26	1.015e-22	Stat5b, Rfwd3, Ino80, Chek2, Ercc3, Prkacb, Uhmk1, Rara, Mapkapk2, Lats1, Ets1, Brd7, Ywhah, Smc1a, Wee2, Gnb2l1, Bub3, Cep192, Ddit3, Mov10l1, Cdc23, Ccnk, Nsmce2, Kat2b, Trp53, Apc, Rps6, Pim1, Sesn3, Gas2, Bcl2, Casp2, Lif, Fnta, Ptprc, Paf1, Rnf4, Ppp2r5c, Uimc1, Terf1, Ccnl2, Usp22, Madd, Smc3, Cdc73, BC004004, Rnf167, Ilk, Son, Ing4, Pten, Tgfb1, Foxk1, Obfc2a, 6720463M24Rik, Rpl24, Pafah1b…
GO:0022613	ribonucleoprotein complex	0.02269 ( 76 of 3350 genes )	0.00609 ( 207 of 34011 annotated genes )	3.036e-26	1.421e-22	Rps24, Dis3, Ptbp2, Rps18, Rps25, Ddx56, Nob1, Rrp1b, Rplp0, Prmt5, Nhp2, Rpl7, Rps7, Dync1h1, Exosc1, Patl1, Mina, Utp6, Celf1, Rps19, Rps2, Mbnl1, Rpl5, Aatf, Rps6, Rps28, Rrn3, Ebna1bp2, Rpsa, Mphosph10, Nufip1, Lsm14a, Tsr1, Nop10, Srsf10, Rps21, Prpf31, Gnl2, Rbm5, Eif3d, Zrsr2, Rrp36, Eri1, Pum2, Eftud1, Rps16, Rrp1, Celf2, Mrto4, Fbl, Lsg1, Pten, Nop58, Rpl11, Npm1, Rpl24, Nol8, Nop56, Rps…
GO:0006461	protein complex assembly	0.04955 ( 166 of 3350 genes )	0.02164 ( 736 of 34011 annotated genes )	3.248e-26	1.52e-22	Tuba8, Wasl, Tuba1b, Lats1, Pfn2, Dgkd, Gnb2l1, Hsp90aa1, Ttn, Atf7ip, Crtc3, Oxa1l, Ehd3, Hgsnat, Flna, Trp53, Apc, Hjurp, Ap2b1, Bclaf1, Stub1, Hmgcr, Tuba1a, Hcfc1, Lrrc50, Gpx3, Evl, Picalm, H2-Ke2, Clip1, Tmed10, Wdr19, Ccl5, Tmem48, Olfm1, Hspa4, Stxbp3a, Rnf4, Gabra6, Ccdc88c, Terf1, Vasp, Creb1, Igf1r, Clgn, Gsk3b, Arfgef1, Ilk, Prkcd, Ccl11, Tgfb1, Npm1, Actr3, Trim21, Ggn, Bax, Add1, Ve…
GO:0070271	protein complex biogenesi	0.04955 ( 166 of 3350 genes )	0.02167 ( 737 of 34011 annotated genes )	3.808e-26	1.782e-22	Tuba8, Wasl, Tuba1b, Lats1, Pfn2, Dgkd, Gnb2l1, Hsp90aa1, Ttn, Atf7ip, Crtc3, Oxa1l, Ehd3, Hgsnat, Flna, Trp53, Apc, Hjurp, Ap2b1, Bclaf1, Stub1, Hmgcr, Tuba1a, Hcfc1, Lrrc50, Gpx3, Evl, Picalm, H2-Ke2, Clip1, Tmed10, Wdr19, Ccl5, Tmem48, Olfm1, Hspa4, Stxbp3a, Rnf4, Gabra6, Ccdc88c, Terf1, Vasp, Creb1, Igf1r, Clgn, Gsk3b, Arfgef1, Ilk, Prkcd, Ccl11, Tgfb1, Npm1, Actr3, Trim21, Ggn, Bax, Add1, Ve…
GO:0044093	positive regulation of mo	0.05791 ( 194 of 3350 genes )	0.02731 ( 929 of 34011 annotated genes )	4.902e-26	2.294e-22	Uaca, Rhebl1, Zc3hav1, Myo9b, Prkcb, Plcd1, Rara, Ccr7, Krit1, Gnb2l1, Map3k5, Fis1, Crtc3, Sipa1l1, Dnajc10, Itk, Rps3, Itsn1, Csk, Akt2, Gna13, Bcap31, Calcrl, Rnf31, Pim1, Arhgap1, Araf, Bcl2, Park7, Kiss1r, Pycard, Epb4.1, Bin1, Calm1, Itgb3, Il10, Ahsa1, Ccl5, Map4k2, Hspa4, Fxn, Agap2, Hmgn3, Fnta, Ptprc, Gnai2, Ifnb1, Arhgef10l, Vac14, Terf1, Itgb2, Tlr2, Rela, Madd, Gsk3b, Irak2, Gnas, Ar…
GO:0060548	negative regulation of ce	0.04537 ( 152 of 3350 genes )	0.01920 ( 653 of 34011 annotated genes )	1.388e-25	6.498e-22	Stat5b, Rara, Birc6, Ywhah, Bcl11b, Ccr7, Krit1, Apip, Gpi1, Atg7, Rock1, Hbxip, Trp53, Nfkb1, Apc, Itsn1, Sgk3, Akt2, Rps6, Pim1, Hmgcr, Rtn4, Mkl1, Araf, Bcl2, Park7, Hdac1, Cd27, Npy5r, Rag1, Itgb3, Il10, Casp2, Ccl5, Ntrk3, Hspa4, Fxn, Agap2, Fnta, Itga6, Rps6ka1, Pea15a, Dad1, Ints1, Rela, Igf1r, Gsk3b, Igbp1, Prdx3, Ilk, Hsph1, Sod1, Son, Prkcd, Arrb2, Tmbim4, Pten, Cbl, Clcf1, Npm1, Ercc5,…
GO:0045321	leukocyte activation	0.03940 ( 132 of 3350 genes )	0.01549 ( 527 of 34011 annotated genes )	1.689e-25	7.904e-22	Stat5b, Psmb10, Prkcb, Sp3, Rara, Nfkbid, Bcl11b, Ccr7, Adora3, Hsp90aa1, Cbfb, Lgals8, Chd7, Lgals1, Il12rb1, Trp53, Itk, Tcf7, Rnf168, Cplx2, Apc, Lax1, Csk, Prkdc, Rps6, Bcl2, Cd27, Rbpj, Lcp1, Rag1, Il10, Ccl5, Ptprc, Il20rb, Zbtb32, Ifnb1, Samsn1, Inpp5d, Itgb2, Tlr2, Zeb1, Igbp1, Foxp1, Ptpn22, Cd5, Hsph1, Sit1, Prkcd, Tgfb1, Pknox1, Clcf1, Zbtb7b, Rhoh, Bax, Ppp3cb, Tnfrsf14, Card11, Tusc2…
GO:0001775	cell activation	0.04269 ( 143 of 3350 genes )	0.01755 ( 597 of 34011 annotated genes )	1.945e-25	9.103e-22	Stat5b, Psmb10, Prkcb, Sp3, Rara, Nfkbid, Bcl11b, Wee2, Ccr7, Adora3, Hsp90aa1, Cbfb, Lgals8, Chd7, Lgals1, Il12rb1, Trp53, Itk, Tcf7, Rnf168, Cplx2, Apc, Lax1, Csk, Gna13, Prkdc, Rps6, Il17ra, Bcl2, Evl, Cd27, Rbpj, Lcp1, Rag1, Itgb3, Il10, Ccl5, Ptprc, Il20rb, Rps6ka1, Stxbp3a, Zbtb32, Ifnb1, Samsn1, Inpp5d, Itgb2, Tlr2, Zeb1, Igbp1, Foxp1, Ptpn22, Cd5, Hsph1, Sit1, Prkcd, Tgfb1, Pknox1, Clcf1,…
GO:0006259	DNA metabolic process	0.04388 ( 147 of 3350 genes )	0.01838 ( 625 of 34011 annotated genes )	2.919e-25	1.366e-21	Rfwd3, Ino80, Chek2, Ercc3, Ctcf, Top3b, Smc1a, Bcl11b, Orc5, Dnmt3a, Atf7ip, Bmp5, Pds5a, Nsmce2, Trp53, Tcf7, Rnf168, Atrx, Rps3, Rad54l, Stub1, Prkdc, Xrn2, Apitd1, Chtf18, Smg1, Supt16h, Rag1, Ptprc, Mcm4, Rad23b, Uimc1, Terf1, Igf1r, Gsk3b, Foxp1, Smc3, Poli, Gnas, Tk2, Top1, Mcm6, Orc3, Nasp, Sod1, Ing4, Ssrp1, Rad21, C230052I12Rik, Tgfb1, Obfc2a, Clcf1, Morf4l1, Npm1, Ercc5, Mta2, Nol8, Xa…
GO:0002521	leukocyte differentiation	0.02955 ( 99 of 3350 genes )	0.00985 ( 335 of 34011 annotated genes )	3.276e-25	1.534e-21	Tyro3, Stat5b, Il25, Sp3, Rara, Clptm1, Psen1, Nfkbid, Adam17, Bcl11b, Ccr7, Id2, Hsp90aa1, Spn, Cbfb, Ptpn6, Tesc, Mll5, Lgals8, Chd7, Lgals1, Stat6, Clec2i, Trp53, Itk, Vav1, Tcf7, Il2rg, Apc, Pik3r1, Prkdc, Rps6, Tgfbr2, Rnf41, Ctla4, Bcl2, Ikzf1, Cd27, Runx1, Rbpj, Rag1, Itgb3, Ccl5, Lif, Ptprc, Ctla2a, Nckap1l, Ifnb1, Inpp5d, Pcid2, Casp8, Satb1, Foxp3, Zeb1, Chuk, Foxp1, Gnas, Thoc5, Ndfip1…
GO:0043066	negative regulation of ap	0.04358 ( 146 of 3350 genes )	0.01823 ( 620 of 34011 annotated genes )	3.744e-25	1.753e-21	Stat5b, Rara, Birc6, Ywhah, Bcl11b, Ccr7, Krit1, Apip, Gpi1, Atg7, Rock1, Hbxip, Trp53, Nfkb1, Apc, Itsn1, Sgk3, Akt2, Rps6, Pim1, Hmgcr, Rtn4, Mkl1, Araf, Bcl2, Park7, Hdac1, Cd27, Npy5r, Rag1, Il10, Casp2, Ccl5, Hspa4, Fxn, Agap2, Fnta, Itga6, Rps6ka1, Pea15a, Dad1, Ints1, Rela, Igf1r, Gsk3b, Igbp1, Prdx3, Ilk, Hsph1, Sod1, Son, Prkcd, Arrb2, Tmbim4, Pten, Cbl, Clcf1, Npm1, Ercc5, Bax, Notch1, …
GO:2000026	regulation of multicellul	0.06537 ( 219 of 3350 genes )	0.03305 ( 1124 of 34011 annotated genes )	4.662e-25	2.182e-21	Stat5b, Bai2, Prkcb, Rara, Frzb, Ets1, Nfkbid, Ywhah, Bcl11b, Anapc2, Ccr7, Krit1, Hsp90aa1, 2400003C14Rik, Sez6, Snw1, Rcor1, Ddit3, Rapgef4, Lgals1, Sipa1l1, Pde3b, Rock1, Mbnl3, Tspo, Trp53, Apc, Nr2c2, Zhx2, Nipbl, Hmgcr, Stat1, Rtn4, Klk6, Bcl2, Hdac1, Cd27, Erap1, Rbpj, Bcor, Itgb3, Ccl5, Tcfap2c, Ntrk3, Lif, Fxn, Agap2, Luc7l, Ptprc, Paf1, Sema3a, Barhl2, Ifnb1, Rufy3, Inpp5d, Itgb2, Rela,…
GO:0022403	cell cycle phase	0.04269 ( 143 of 3350 genes )	0.01770 ( 602 of 34011 annotated genes )	4.683e-25	2.192e-21	Rfwd3, Ino80, Chek2, Csnk1a1, Kif2a, Lats1, Brd7, Birc6, Ywhah, Smc1a, Anapc2, Wee2, Csnk1d, Vrk1, Bub3, Anp32b, Cep192, Cdc23, Pds5a, Nfatc1, Ccnk, Nsmce2, Ubr2, Flna, Trp53, Sgol1, Apc, Ckap5, Nipbl, Rps6, Pim1, Bcl2, Arl8b, Apitd1, Chd3, Setd8, Cul3, Casp2, Lif, Ptprc, Paf1, Rhou, Rnf4, Ppp2r5c, Terf1, Psmd13, Clgn, 4922501C03Rik, Smc3, Cdc73, Pds5b, Nek9, Ppp1r12a, Pten, Rad21, Tgfb1, Bat3, 6…
GO:0070727	cellular macromolecule lo	0.04716 ( 158 of 3350 genes )	0.02058 ( 700 of 34011 annotated genes )	4.855e-25	2.273e-21	Uaca, Uhmk1, Ap3m1, Wasl, Lats1, Smad7, Appl1, Ywhah, Vamp4, Gnb2l1, Hsp90aa1, Cltb, Rab13, Scarb2, Tomm20, Stx5a, Oxa1l, Ehd3, Flna, Trp53, Morc3, Copb1, Csk, Akt2, Arcn1, Bcap31, Ap2b1, Pde2a, Tap1, Nipbl, Uso1, Ubr5, Kpnb1, Mtap7, Lcp1, Tmed10, Xpo6, Tmem48, Hspa4, Xpo7, Samm50, Tmem188, Tlr2, Arntl, Rab7, Gsk3b, Tnpo3, Tnpo1, Ralgapa2, Nup155, Copa, Rad21, Nop58, Tgfb1, Bat3, Rpl11, Cer1, Mrp…
GO:0006955	immune response	0.04507 ( 151 of 3350 genes )	0.01926 ( 655 of 34011 annotated genes )	5.749e-25	2.691e-21	Stat5b, Phpt1, Cd247, Trpm4, Prkcb, Rara, Mapkapk2, Ccr7, Adora3, Mmp7, Map3k5, Lgals8, Lgals1, H2-T23, Il12rb1, Trp53, Itk, Rnf168, Cplx2, Lax1, Csk, Bcap31, H2-K1, Tap1, Ubash3a, Rps6, Rnf31, Nlrc5, Stat1, Bcl2, Pycard, Ilf2, Rbpj, Lcp1, Psmb4, Il10, Ccl5, Map4k2, Lif, Ptprc, Il20rb, Ifnb1, Samsn1, Inpp5d, Tlr2, Rela, Skap1, Igf1r, 2010106G01Rik, Ptpn22, Il18bp, C4bp, Prkcd, Arrb2, Ccl11, Tgfb1…
GO:0009894	regulation of catabolic p	0.03582 ( 120 of 3350 genes )	0.01353 ( 460 of 34011 annotated genes )	6.132e-25	2.87e-21	Mylip, Chek2, Rasa2, Prkaa1, Zc3hav1, Myo9b, Arhgap15, Ubxn1, Smad7, Psen1, Hsd11b1, Ccr7, Gnb2l1, D630037F22Rik, Csnk1d, Atg7, A930001N09Rik, Bves, Oxa1l, Sipa1l1, Pde3b, Dnajc10, Rgs14, Flna, Vav1, Psmd10, Apc, Rabgap1, Git2, Akt2, Acap2, Stub1, Gpx1, Arhgap1, Psmd3, Ppp1cb, Tbcd, Smad4, Scrib, Banp, Ppp1ca, Psmd2, Tbc1d5, Lrrk2, Bin1, Ppp1r3b, Il10, Ahsa1, Trim30a, Agap2, Arhgap9, Nckap1l, Lar…
GO:0007165	signal transduction	0.19433 ( 651 of 3350 genes )	0.13851 ( 4711 of 34011 annotated genes )	8.06e-25	3.773e-21	Uaca, Hrh1, Prkacb, Cd247, Arhgef3, Rara, Mapkapk2, Brd7, Smc1a, Gpr133, Rassf2, Ttn, Bves, Adrbk1, Pde3b, Mapk6, Gpr174, Flna, Rabgap1, Duox1, Akt2, Arhgdia, Psd4, Nlrc5, Bcl2, Araf, Gpsm2, Park7, Dusp7, Ubr5, Rbpj, Lancl2, Itgb3, Lif, Grid2ip, Cdc42se1, Arl4a, Pea15a, Gpr45, Ccdc88c, Inpp5d, Rhot1, Rela, Itga4, Zeb1, Gsk3b, Dkk3, Chuk, Cdc73, Als2cl, Rab21, Scyl2, Ptpn22, Ilk, Tnik, Numb, Arrb2…
GO:0034613	cellular protein localiza	0.04687 ( 157 of 3350 genes )	0.02049 ( 697 of 34011 annotated genes )	8.636e-25	4.043e-21	Uaca, Uhmk1, Ap3m1, Wasl, Lats1, Smad7, Appl1, Ywhah, Vamp4, Gnb2l1, Hsp90aa1, Cltb, Rab13, Scarb2, Tomm20, Stx5a, Oxa1l, Ehd3, Flna, Trp53, Morc3, Copb1, Csk, Akt2, Arcn1, Bcap31, Ap2b1, Pde2a, Tap1, Nipbl, Uso1, Ubr5, Kpnb1, Mtap7, Lcp1, Tmed10, Xpo6, Tmem48, Hspa4, Xpo7, Samm50, Tmem188, Tlr2, Arntl, Rab7, Gsk3b, Tnpo3, Tnpo1, Ralgapa2, Nup155, Copa, Rad21, Nop58, Tgfb1, Bat3, Rpl11, Cer1, Mrp…
GO:0018193	peptidyl-amino acid modif	0.03851 ( 129 of 3350 genes )	0.01520 ( 517 of 34011 annotated genes )	8.763e-25	4.102e-21	Uhmk1, Prkcb, Ctcf, Mapkapk2, Lats1, Brd7, Smad7, Setd7, Hcls1, Ezh1, Galnt1, Adrbk1, Kat2b, Il12rb1, Ttll4, Trp53, Morc3, Akt2, Pkn1, Prkdc, Hcfc1, Araf, Bcl2, Fbxo11, Smg1, Setd8, Tnk2, Itgb3, Ccl5, Lif, Brpf3, Ptprc, Samsn1, Setd1a, Itgb2, Usp22, Kat2a, Brd8, Gsk3b, Ilk, Ing4, Prkcd, Arrb2, Cd81, Hdac4, Tgfb1, Bat3, Setd3, Morf4l1, Clcf1, Nat15, Bax, Pak2, Myst3, Brca1, Vegfa, Tnfrsf14, Tada3,…
GO:0043069	negative regulation of pr	0.04358 ( 146 of 3350 genes )	0.01841 ( 626 of 34011 annotated genes )	1.04e-24	4.87e-21	Stat5b, Rara, Birc6, Ywhah, Bcl11b, Ccr7, Krit1, Apip, Gpi1, Atg7, Rock1, Hbxip, Trp53, Nfkb1, Apc, Itsn1, Sgk3, Akt2, Rps6, Pim1, Hmgcr, Rtn4, Mkl1, Araf, Bcl2, Park7, Hdac1, Cd27, Npy5r, Rag1, Il10, Casp2, Ccl5, Hspa4, Fxn, Agap2, Fnta, Itga6, Rps6ka1, Pea15a, Dad1, Ints1, Rela, Igf1r, Gsk3b, Igbp1, Prdx3, Ilk, Hsph1, Sod1, Son, Prkcd, Arrb2, Tmbim4, Pten, Cbl, Clcf1, Npm1, Ercc5, Bax, Notch1, …
GO:0042110	T cell activation	0.02746 ( 92 of 3350 genes )	0.00885 ( 301 of 34011 annotated genes )	1.087e-24	5.088e-21	Stat5b, Psmb10, Sp3, Rara, Clptm1, Psen1, Nfkbid, Adam17, Bcl11b, Ccr7, Hsp90aa1, Spn, Ptpn6, Lgals8, Lat, Chd7, Lgals1, Stat6, Il12rb1, Clec2i, Trp53, Itk, Il6st, Vav1, Tcf7, Il2rg, Apc, Lax1, Csk, Cd47, Prkdc, Rps6, Tgfbr2, Ctla4, Nlrc3, Bcl2, Ikzf1, Cd27, Dlg1, Ifnar1, Lcp1, Itgal, Rag1, Ccl5, Coro1a, Ptprc, Il20rb, Ctla2a, Nckap1l, Zbtb32, Ifnb1, Itgb2, Satb1, Foxp3, Zeb1, Ndfip1, Ptpn22, Cd5…
GO:0046649	lymphocyte activation	0.03493 ( 117 of 3350 genes )	0.01308 ( 445 of 34011 annotated genes )	1.161e-24	5.433e-21	Tyro3, Stat5b, Psmb10, Prkcb, Sp3, Rara, Clptm1, Psen1, Nfkbid, Adam17, Bcl11b, Ccr7, Id2, Hsp90aa1, Spn, Cbfb, Ptpn6, Lgals8, Lat, Chd7, Lgals1, Stat6, Il12rb1, Clec2i, Trp53, Itk, Il6st, Vav1, Tcf7, Rnf168, Il2rg, Apc, Lax1, Csk, Pik3r1, Cd47, Prkdc, Rps6, Tgfbr2, Rnf41, Ctla4, Nlrc3, Bcl2, Ikzf1, Cd27, Dlg1, Ifnar1, Rbpj, Lcp1, Paxip1, Itgal, Rag1, Il10, Ccl5, Coro1a, Ptprc, Il20rb, Ctla2a, Nc…
GO:0051301	cell division	0.03403 ( 114 of 3350 genes )	0.01261 ( 429 of 34011 annotated genes )	1.759e-24	8.232e-21	Kif20a, Ino80, Chek2, Cfl1, Cdk20, Csnk1a1, Chmp1b, Kif2a, Nuf2, Lats1, Birc6, Smc1a, Anapc2, Chfr, Spg20, Dis3l2, 2400003C14Rik, Vrk1, Bub3, Cdc25c, Usp8, Usp37, Cdc23, Cdca2, Pds5a, Gnai3, Arl8a, Maea, Ccnk, Nsmce2, Rock1, Rgs14, Lrp6, Anln, Sgol1, Apc, Specc1l, Ckap5, Nedd1, 3200002M19Rik, Aatf, Vps24, Ppp1cb, Cdk11b, Arl8b, Stag2, Smc4, Ppp1ca, Apitd1, Nsun2, Setd8, Calm1, Cul3, Gnai2, Cd2ap,…
GO:0002520	immune system development	0.04179 ( 140 of 3350 genes )	0.01744 ( 593 of 34011 annotated genes )	2.783e-24	1.303e-20	Stat5b, Sp3, Rara, Ets1, Nfkbid, Ccl21a, Bcl11b, Ccr7, Hsp90aa1, Cbfb, Rcor1, Lgals8, Hcls1, Chd7, Lgals1, Trp53, Itk, Tcf7, Rnf168, Nfkb1, Apc, Prkdc, Rps6, Bcl2, Cd27, Picalm, Rbpj, Rag1, Itgb3, Ccl5, Lif, Ptprc, Paf1, Zbtb32, Ifnb1, Inpp5d, Pgm3, Zeb1, Chuk, Foxp1, Cdc73, Gnas, Prdx3, Ptpn22, Tgfb1, Pknox1, Clcf1, Zbtb7b, Rhoh, Bax, Add1, Ppp3cb, Myst3, Vegfa, Card11, Tusc2, B2m, Clec2d, Exoc6…
GO:0048534	hemopoietic or lymphoid o	0.04000 ( 134 of 3350 genes )	0.01647 ( 560 of 34011 annotated genes )	7.207e-24	3.373e-20	Stat5b, Sp3, Rara, Ets1, Nfkbid, Ccl21a, Bcl11b, Ccr7, Hsp90aa1, Cbfb, Rcor1, Lgals8, Hcls1, Chd7, Lgals1, Trp53, Itk, Tcf7, Nfkb1, Apc, Prkdc, Rps6, Bcl2, Cd27, Picalm, Rbpj, Rag1, Itgb3, Ccl5, Lif, Ptprc, Paf1, Zbtb32, Ifnb1, Inpp5d, Pgm3, Zeb1, Chuk, Foxp1, Cdc73, Gnas, Prdx3, Ptpn22, Tgfb1, Pknox1, Clcf1, Zbtb7b, Rhoh, Bax, Add1, Ppp3cb, Myst3, Vegfa, Card11, Tusc2, B2m, Clec2d, Exoc6, Leo1, …
GO:0032446	protein modification by s	0.03134 ( 105 of 3350 genes )	0.01129 ( 384 of 34011 annotated genes )	1.057e-23	4.947e-20	Rfwd3, Mylip, Hspa5, Trpm4, Trip12, Ubxn1, Rnf103, Smad7, Psen1, Birc6, Znrf1, Anapc2, Ubr3, Chfr, Ube2b, Kctd13, Ube3a, Hmg20b, Cdc23, Atg7, Trim27, Rnf20, Pcgf1, Ube2h, Ubr2, Fbxl3, Rnf168, Psmd10, Pja2, Fanci, Herc4, Amfr, Stub1, Rnf31, Hectd1, Rnf41, Bcl2, Ubr1, Arnt, Ubr5, Fbxo45, Lrrk2, Arih1, Rnf213, Paxip1, Trim28, Cand1, Bcor, Rag1, Cul3, Trim30a, Paf1, Aimp2, Crbn, Rnf4, 1110018G07Rik, …
GO:0030097	hemopoiesis	0.03791 ( 127 of 3350 genes )	0.01529 ( 520 of 34011 annotated genes )	1.584e-23	7.416e-20	Tyro3, Stat5b, Cdk13, Nbeal2, Il25, Sp3, Rara, Clptm1, Ets1, Psen1, Nfkbid, Adam17, Bcl11b, Ccr7, Id2, Hsp90aa1, Spn, Cbfb, Ptpn6, Tesc, Rcor1, Mll5, Lgals8, Hcls1, Chd7, Lgals1, Maea, Stat6, Clec2i, Trp53, Itk, Vav1, Tcf7, Il2rg, Rps19, Apc, Pik3r1, Prkdc, Rps6, Tgfbr2, Rnf41, Ctla4, Bcl2, Ikzf1, Cd27, Picalm, Runx1, Rbpj, Rag1, Itgb3, Ccl5, Lif, Ptprc, Paf1, Ctla2a, Stap1, Nckap1l, Zbtb32, Ifnb…
GO:0031399	regulation of protein mod	0.05254 ( 176 of 3350 genes )	0.02487 ( 846 of 34011 annotated genes )	1.607e-23	7.524e-20	Ctcf, Ubxn1, Lats1, Brd7, Smad7, Ccr7, Gnb2l1, Csnk1d, Map3k5, Hcls1, Ttn, Rapgef4, Bmp5, Atg7, Ccnk, Dnajc10, Kat2b, Trp53, Apc, Lax1, Csk, Akt2, Stub1, Nipbl, Pim1, Hmgcr, Araf, Bcl2, Kiss1r, Dusp7, Ppp1r9b, Bcor, Tnk2, Itgb3, Ccl5, Map4k2, Lif, Hspa4, Agap2, Fnta, Ptprc, Gnai2, Rap2c, Ccdc88c, Samsn1, Tmem188, Itgb2, Ccnl2, Madd, Igf1r, Igbp1, Gsk3b, Gnas, Arfgef1, Map2k2, Ilk, Tnik, Sod1, Kid…
GO:0009790	embryo development	0.05701 ( 191 of 3350 genes )	0.02799 ( 952 of 34011 annotated genes )	1.712e-23	8.016e-20	Pcdh12, Plcd1, Sp3, Aff3, Frzb, Nsdhl, Birc6, Gnb2l1, Oas1d, Dnmt3a, Trp53bp2, Tbx6, Ttn, Chd7, Psmc4, Ambra1, Trp53, N4bp2l2, Tcf7, Nr2c2, Gna13, Prkdc, Nipbl, Foxn3, Rps6, Hmgcr, Tcf7l1, Hdac1, Rbpj, Wdr19, Il10, Cul3, Tcfap2c, Lif, Fxn, Paf1, Dad1, Ints1, Vasp, Pgm3, Ncor2, Kat2a, Itga4, Zeb1, Foxp1, Tctn1, Pax7, Cdc73, Gnas, Pbx2, Top1, Nasp, Sod1, Kidins220, Tshz3, Apob, Sox17, Ndel1, Bat3, …
GO:0045892	negative regulation of tr	0.05075 ( 170 of 3350 genes )	0.02379 ( 809 of 34011 annotated genes )	3.036e-23	1.421e-19	Cbx3, Ctcf, Sp3, Rara, Brd7, Smad7, Zfp386, Dnmt3a, Snw1, Rcor1, Ezh1, Atf7ip, Zfp217, Mina, Ubr2, Cops2, Smarcc2, Trp53, Nfkb1, Ubtf, Zhx2, Pde2a, Bclaf1, Nipbl, Foxn3, Zbtb20, Tcf7l1, Hdac1, Tbl1x, Strn3, Rbpj, Per1, Hmbox1, Zhx1, Setd8, Bcor, Lancl2, Arid4a, Paf1, Hes2, Hivep1, Uimc1, Rela, Ncor2, Creb1, Zeb1, Nab1, Gsk3b, Igbp1, Dkk3, Foxp1, Cdc73, Pdcd4, Ing4, Tshz3, Hdac4, Tgfb1, Supt4h1, S…
GO:0023014	signal transduction via p	0.04925 ( 165 of 3350 genes )	0.02279 ( 775 of 34011 annotated genes )	3.223e-23	1.509e-19	Stat5b, Zc3hav1, Prkcb, Nfkbid, Fgf12, Slc20a1, Mapk10, Ccr7, Map3k5, Hcls1, Lgals1, Mapk6, Flna, Stk17b, Psap, Pja2, Apc, Lax1, Itsn1, Csk, Akt2, Gna13, Rnf31, Hmgcr, Zmynd11, Stat1, Lgals9, Araf, Kiss1r, Dusp7, Cd27, Zfp110, Itgb3, Ccl5, Map4k2, Lif, Agap2, Ptprc, Gnai2, Cdc42se1, Rps6ka1, Tlr2, Rela, Map4k4, Madd, Igf1r, Igbp1, Chuk, Erc1, Map2k2, Shisa5, Ilk, Tnik, Sod1, Prkcd, Arrb2, Pten, C…
GO:0042592	homeostatic process	0.06507 ( 218 of 3350 genes )	0.03390 ( 1153 of 34011 annotated genes )	3.278e-23	1.535e-19	Usf2, Stat5b, Mylip, Rps24, Rims4, Vps54, Trpm4, Prkcb, Plcd1, Sp3, Rara, Sh3bgrl3, Ets1, Atp2a1, Smad7, Krit1, Atox1, Slc30a2, Txnl1, Atp2a2, Sez6, Fis1, Rcor1, Aco1, Hcls1, Ddit3, Pde3b, Nsmce2, Dnajc10, Npc2, Tspo, Trp53, Apc, Csk, Akt2, Gna13, Bcap31, Tap1, Prkdc, Rps6, Hmgcr, Bcl2, Park7, Dhrs7c, Itpr1, Mtap7, Itgb3, Ccl5, Fxn, Hmgn3, Ptprc, Il20rb, Kcnq2, Abcc2, Sypl2, Chrnd, Inpp5d, Terf1,…
GO:0009653	anatomical structure morp	0.08985 ( 301 of 3350 genes )	0.05278 ( 1795 of 34011 annotated genes )	5.806e-23	2.718e-19	Myo9b, Prkcb, Plcd1, Rara, Aff3, Ets1, Smad7, Bcl11b, Krit1, Gnb2l1, Gpi1, Ttn, Bves, Sipa1l1, Pde3b, Flna, Apc, Gna13, Rtn4, Lrrc50, Bcl2, Evl, Picalm, Larp4, Mtap7, Rbpj, Bcor, Rab8a, Itgb3, Ccl5, Ntrk3, Lif, Paf1, Hcn1, Rufy3, Rela, Ncor2, Itga4, Igf1r, Zeb1, Gsk3b, Ssh2, Chuk, Tctn1, Cdc73, Ngef, Ilk, Tnik, Tshz3, Numb, Tnnc1, Apob, Tgfb1, Sox17, Ndel1, Pknox1, Med12, Rpl24, Actr3, Capn2, Bax…
GO:0007243	intracellular protein kin	0.04836 ( 162 of 3350 genes )	0.02238 ( 761 of 34011 annotated genes )	8.236e-23	3.855e-19	Stat5b, Zc3hav1, Prkcb, Nfkbid, Fgf12, Slc20a1, Mapk10, Ccr7, Map3k5, Hcls1, Lgals1, Mapk6, Flna, Stk17b, Psap, Pja2, Apc, Lax1, Itsn1, Csk, Akt2, Gna13, Rnf31, Hmgcr, Zmynd11, Stat1, Lgals9, Araf, Kiss1r, Dusp7, Cd27, Zfp110, Itgb3, Ccl5, Map4k2, Lif, Agap2, Ptprc, Gnai2, Cdc42se1, Rps6ka1, Tlr2, Rela, Map4k4, Madd, Igf1r, Igbp1, Chuk, Erc1, Map2k2, Shisa5, Ilk, Tnik, Sod1, Prkcd, Arrb2, Pten, C…
GO:0007264	small GTPase mediated sig	0.03642 ( 122 of 3350 genes )	0.01473 ( 501 of 34011 annotated genes )	1.557e-22	7.287e-19	Rhebl1, Rasa2, Arl4c, Myo9b, Arhgef3, Arhgap15, Ccr7, D630037F22Rik, Rab13, Arhgef18, Kctd13, Usp8, Lat, Ttn, Rapgef4, Obscn, Pecam1, Bves, Elmo1, Dab1, Arl8a, Spata13, Sipa1l1, Rock1, Vav1, Arhgef11, Rabgap1, Itsn1, Git2, Akt2, Gna13, Acap2, Arhgdia, Arhgap1, Psd4, Rhot2, Arl8b, Scrib, Rab22a, Rasgrp1, Tbc1d5, Lrrk2, Arhgef1, Rab8a, Cul3, Agap2, Rasgrp2, Arl4a, Cdc42se1, Rab1, Nckap1l, Rhou, Rap…
GO:0042127	regulation of cell prolif	0.06090 ( 204 of 3350 genes )	0.03140 ( 1068 of 34011 annotated genes )	2.535e-22	1.186e-18	Stat5b, Wisp2, Trpm4, Ptbp2, Plcd1, Rara, Frzb, Ets1, Brd7, Birc6, Bcl11b, Ccr7, Krit1, Mmp7, Hcls1, Bmp5, Ambra1, Mina, Kat2b, Il12rb1, Cnbp, Tspo, Trp53, Tcf7, Morc3, Apc, Csk, Calcrl, Hmgcr, Stat1, Bcl2, Kiss1r, Hdac1, Rbpj, Npy5r, Itgb3, Il10, Ccl5, Lif, Fxn, Agap2, Fnta, Ptprc, Il20rb, Gnai2, Ppp2r5c, Inpp5d, Rela, Zeb1, Foxp1, Cdc73, Prdx3, Ptpn22, Nr4a1, Ilk, Pds5b, Ing4, Pten, Hdac4, Atp2…
GO:0016044	cellular membrane organiz	0.03910 ( 131 of 3350 genes )	0.01652 ( 562 of 34011 annotated genes )	2.839e-22	1.329e-18	Wasl, Rara, Appl1, Elmo2, Ccr7, Gnb2l1, Hsp90aa1, Ube3a, Mfn1, Atg7, Atad1, Stx5a, Oxa1l, Ehd3, Adrbk1, Trp53, Sgip1, Itsn1, Csk, Akt2, Ap2b1, Calcrl, Rab22a, Uso1, Picalm, Mtap7, Bin1, Tnk2, Rab8a, Cul3, Hspa4, Cdc42se1, Abca7, Samm50, Coro1c, Nrcam, Arfgef1, Nup155, Scyl2, Rin2, Sod1, Arrb2, Pten, Zmpste24, Tgfb1, Ndel1, Bat3, Pafah1b1, Bax, Add1, Vegfa, Pip5k1a, Vps33b, Syne1, Ghr, Arfgef2, Ga…
GO:0010629	negative regulation of ge	0.05612 ( 188 of 3350 genes )	0.02811 ( 956 of 34011 annotated genes )	4.14e-22	1.938e-18	Cbx3, Ctcf, Sp3, Rara, Brd7, Smad7, Zfp386, Dnmt3a, Tnrc6b, Snw1, Rcor1, Tnrc6a, Ezh1, Atf7ip, Zfp217, Mina, Ubr2, Cops2, Smarcc2, Trp53, Nfkb1, Ubtf, Zhx2, Pde2a, Bclaf1, Nipbl, Foxn3, Zbtb20, Tcf7l1, Hdac1, Tbl1x, Strn3, Rbpj, Per1, Hmbox1, Zhx1, Setd8, Bcor, Lancl2, Hspa4, Arid4a, Paf1, Hes2, Hivep1, Uimc1, Eri1, Rela, Ncor2, Creb1, Zeb1, Nab1, Igbp1, Gsk3b, Dkk3, Foxp1, Cdc73, Eif2c1, Pdcd4, …
GO:0006886	intracellular protein tra	0.03642 ( 122 of 3350 genes )	0.01494 ( 508 of 34011 annotated genes )	5.481e-22	2.566e-18	Uaca, Cfl1, Uhmk1, Ap3m1, Ywhah, Vamp4, Cherp, Hsp90aa1, Cse1l, Cltb, Sar1b, Rab13, Scarb2, Tesc, Scamp3, Tomm20, Stx5a, Ehd3, Nfasc, Hspa9, Hsp90ab1, Flna, Trp53, Psmd10, Copb1, Mff, Csk, Ppp3ca, Pik3r1, Arcn1, Bcap31, Ap2b1, Pde2a, Tap1, Tnpo2, Calr, Oprd1, l7Rn6, Tmem173, Timm44, Smad4, Uso1, Ahcyl1, Ubr5, Kpnb1, Stx3, Lcp1, Tmed10, Xpo6, Hspa4, Rab1, Mgea5, Xpo7, Gga3, Samm50, Derl2, Snupn, E…
GO:0061024	membrane organization	0.03910 ( 131 of 3350 genes )	0.01667 ( 567 of 34011 annotated genes )	6.549e-22	3.065e-18	Wasl, Rara, Appl1, Elmo2, Ccr7, Gnb2l1, Hsp90aa1, Ube3a, Mfn1, Atg7, Atad1, Stx5a, Oxa1l, Ehd3, Adrbk1, Trp53, Sgip1, Itsn1, Csk, Akt2, Ap2b1, Calcrl, Rab22a, Uso1, Picalm, Mtap7, Bin1, Tnk2, Rab8a, Cul3, Hspa4, Cdc42se1, Abca7, Samm50, Coro1c, Nrcam, Arfgef1, Nup155, Scyl2, Rin2, Sod1, Arrb2, Pten, Zmpste24, Tgfb1, Ndel1, Bat3, Pafah1b1, Bax, Add1, Vegfa, Pip5k1a, Vps33b, Syne1, Ghr, Arfgef2, Ga…
GO:0016567	protein ubiquitination	0.02896 ( 97 of 3350 genes )	0.01047 ( 356 of 34011 annotated genes )	7.016e-22	3.284e-18	Rfwd3, Mylip, Hspa5, Trip12, Ubxn1, Rnf103, Smad7, Psen1, Birc6, Znrf1, Anapc2, Ubr3, Chfr, Ube2b, Kctd13, Ube3a, Cdc23, Atg7, Trim27, Rnf20, Pcgf1, Ube2h, Ubr2, Fbxl3, Rnf168, Psmd10, Pja2, Fanci, Herc4, Amfr, Stub1, Rnf31, Hectd1, Rnf41, Bcl2, Ubr1, Ubr5, Fbxo45, Lrrk2, Arih1, Rnf213, Paxip1, Trim28, Cand1, Bcor, Rag1, Cul3, Trim30a, Paf1, Aimp2, Crbn, Rnf4, 1110018G07Rik, Dtx3l, Mad2l1, Klhl20…
GO:0007399	nervous system developmen	0.07403 ( 248 of 3350 genes )	0.04143 ( 1409 of 34011 annotated genes )	7.698e-22	3.604e-18	Mylip, Bai2, Mycbp2, Uhmk1, Rara, Kif2a, Frzb, Ywhah, Bcl11b, Anapc2, Hsp90aa1, 2400003C14Rik, Slc23a1, Trp53bp2, Sez6, Amigo3, Snw1, Rapgef4, Fos, Chd7, Atg7, Lgals1, Ambra1, Sipa1l1, Cops2, Smarcc2, Tspo, Trp53, Tcf7, Cplx2, Ppia, Atrx, Apc, Nr2c2, Rfx4, Akt2, Zhx2, Prkdc, Nipbl, Psd4, Tcf7l1, Rtn4, Klk6, Bcl2, Hdac1, Evl, Picalm, Fbxo45, Ppp1r9b, Rbpj, Wdr19, Ccl5, Tcfap2c, Ntrk3, Lif, Fxn, Se…
GO:0045944	positive regulation of tr	0.04567 ( 153 of 3350 genes )	0.02102 ( 715 of 34011 annotated genes )	7.71e-22	3.609e-18	Usf2, Stat5b, Ino80, Ercc3, Rara, Ets1, Tcf20, Bcl11b, Cbfb, Ube3a, Snw1, Ddit3, Fos, Bmp5, Nfatc1, Zfp292, Kat2b, Safb, Cnbp, Trp53, Nfkb1, Nr2c2, Rfx4, Akt2, Prkdc, Nlrc5, Tcf7l1, Stat1, Mkl1, Nufip1, Hdac1, Tbl1x, Strn3, Rbpj, Asxl2, Il10, Tcfap2c, Lif, Agap2, Hmgn3, Paf1, Itga6, Rps6ka1, Barhl2, Rnf4, Ifnb1, Arhgef10l, Tlr2, Rela, Skap1, Creb1, Arntl, Zeb1, Dcaf6, Gsk3b, Igbp1, Foxp1, Cdc73, …
GO:0006974	response to DNA damage st	0.03403 ( 114 of 3350 genes )	0.01364 ( 464 of 34011 annotated genes )	1.79e-21	8.38e-18	Uaca, Rfwd3, Ino80, Chek2, Zbtb40, Ercc3, Mapkapk2, Recql, Ino80d, Usp28, Psen1, Smc1a, Usp47, Ube2b, Msh5, Polb, Gtf2h2, Nsmce2, Trp53, Usp7, Rnf168, Psmd10, Fanci, Atrx, Apc, Rps3, Rad54l, Stub1, Prkdc, Nipbl, Xrn2, Ctla4, Bcl2, Smc4, Ubr5, Apitd1, Fbxo45, Smg1, Rad50, Paxip1, 5730403B10Rik, Trim28, Setd8, Supt16h, Casp2, Dtx3l, Ppp2r5c, Lig3, Rad23b, Uimc1, Smc5, Baz1b, Parp2, Wrn, Pgap2, Ube2…
GO:0048585	negative regulation of re	0.04239 ( 142 of 3350 genes )	0.01908 ( 649 of 34011 annotated genes )	2.743e-21	1.284e-17	Uaca, Phpt1, Prkcb, Lats1, Frzb, Smad7, Nfkbid, Ddit3, Bmp5, Adrbk1, Ubr2, Trp53, Apc, Rps3, Csk, Tap1, Calcrl, Ubash3a, Hmgcr, Nlrc5, Zmynd11, Stat1, Rtn4, Hdac1, Strn3, Psmb4, Il10, Ccl5, Cul3, Lif, Ptprc, Il20rb, Cdc42se1, Sema3a, Samsn1, Inpp5d, Cilp, Rela, Igf1r, Gsk3b, Igbp1, Dkk3, Scyl2, Ptpn22, Prkcd, Numb, Arrb2, Pten, Tgfb1, Sox17, Med12, Pafah1b1, Cer1, Rhoh, Rasa3, Cr1l, Ppp3cb, Notch…
GO:0046039	GTP metabolic process	0.02806 ( 94 of 3350 genes )	0.01017 ( 346 of 34011 annotated genes )	3.768e-21	1.764e-17	Rhebl1, Rasa2, Tuba8, Myo9b, Arhgap15, Tuba1b, Ccr7, Gnb2l1, D630037F22Rik, Rab13, Mfn1, Bves, Gnai3, Sipa1l1, Rgs14, Vav1, Rabgap1, Akt2, Git2, Gna13, Acap2, Arhgap1, Tuba1a, Gfm1, Rhot2, Tbcd, Gng4, Scrib, Rab22a, Tbc1d5, Lrrk2, Bin1, Txndc3, Agap2, Gnl2, Arhgap9, Arl4a, Gnai2, Nckap1l, Rhou, Rap2c, Arhgef10l, Rab9, Rhot1, Gsk3b, Rab7, Eftud1, Nras, Gnas, Arfgef1, Arfgap3, Arhgap4, Ralgapa2, Ra…
GO:0030098	lymphocyte differentiatio	0.02209 ( 74 of 3350 genes )	0.00691 ( 235 of 34011 annotated genes )	5.532e-21	2.589e-17	Tyro3, Stat5b, Sp3, Rara, Clptm1, Nfkbid, Adam17, Bcl11b, Ccr7, Id2, Hsp90aa1, Spn, Cbfb, Ptpn6, Lgals8, Chd7, Lgals1, Stat6, Trp53, Itk, Vav1, Tcf7, Il2rg, Apc, Pik3r1, Prkdc, Rps6, Tgfbr2, Rnf41, Ctla4, Bcl2, Ikzf1, Cd27, Rbpj, Rag1, Ptprc, Ctla2a, Nckap1l, Ifnb1, Inpp5d, Pcid2, Foxp3, Satb1, Zeb1, Foxp1, Ndfip1, Ptpn22, Tgfb1, Cd3e, Clcf1, Pknox1, Zbtb7b, Il4ra, Bax, Rhoh, Hells, Ppp3cb, Il7r,…
GO:0051049	regulation of transport	0.05731 ( 192 of 3350 genes )	0.02964 ( 1008 of 34011 annotated genes )	6.324e-21	2.96e-17	Uaca, Rims4, Uhmk1, Trpm4, Prkcb, Plcd1, Wasl, Lats1, Appl1, Ywhah, Vamp4, Pfn2, Ccr7, Adora3, Gnb2l1, Hsp90aa1, Clcn1, Rapgef4, Chd7, Atad1, Stk39, Cacna2d2, Adrbk1, Tpcn1, Pde3b, Use1, Scfd1, Flna, Tspo, Sgip1, Csk, Akt2, Pde2a, Hmgcr, Rtn4, Bcl2, Park7, Kiss1r, Pycard, Dhrs7c, Ubr5, Picalm, Itpr1, Bin1, Npy5r, Lcp1, Tnk2, Rab8a, Kcnj12, Itgb3, Il10, Ccl5, Lif, Adipor2, Hmgn3, Pea15a, Kcnq2, Vd…
GO:0030029	actin filament-based proc	0.03015 ( 101 of 3350 genes )	0.01156 ( 393 of 34011 annotated genes )	1.088e-20	5.093e-17	Cfl1, Tmsb10, Phpt1, Myo9b, Wasl, Lats1, Pfn2, Ccr7, Arhgef18, Kctd13, Epb4.1l2, Hsp90b1, Ttn, Elmo1, Sipa1l1, Rock1, Flna, Clec2i, Ptk7, Acap2, Tln1, Calr, Pfn4, Bcl2, Kiss1r, Evl, Dlg1, Ppp1r9b, Myl6, Epb4.1, Diap1, Lcp1, Cul3, Grid2ip, Agap2, Coro1a, Nckap1l, Rhou, Myo1b, Wasf2, Tpm1, Arhgef10l, Daam1, Coro1c, Vasp, Ssh1, Llgl1, Ssh2, Foxp1, Spnb2, Capza1, Ezr, Arfgef1, Abr, Ilk, Tnik, Mon2, R…
GO:0050776	regulation of immune resp	0.02866 ( 96 of 3350 genes )	0.01070 ( 364 of 34011 annotated genes )	1.397e-20	6.541e-17	Tyro3, Stat5b, Phpt1, Pram1, Cd247, Trpm4, Prkcb, Rara, Mapkapk2, Psen1, Ccr7, Adora3, Spn, Ptpn6, C8a, Prkd2, Trim27, Plcg1, H2-T23, Stat6, Il12rb1, Clec2i, Itk, Lax1, H2-D1, Csk, Masp2, Prkch, H2-K1, Tap1, Ubash3a, Rnf31, Gpx1, Nlrc5, Ctla4, Bcl2, Tmem173, Pycard, Pvr, Paxip1, Psmb4, Il10, Trim30a, Ptprc, Il20rb, Nckap1l, Tbk1, Samsn1, Cd37, Inpp5d, Tlr2, Rela, Skap1, Foxp3, Abr, 2010106G01Rik,…
GO:0010608	posttranscriptional regul	0.02716 ( 91 of 3350 genes )	0.00985 ( 335 of 34011 annotated genes )	1.623e-20	7.595e-17	Mylip, Uhmk1, Rara, Paip1, Mapkapk2, Smad7, Ift46, Ndufa13, Gnb2l1, Ube2b, Tnrc6b, Tesc, Aco1, Tnrc6a, Hnrnpu, Eif5b, Patl1, Eif4ebp1, Flna, Eif3k, Usp7, Morc3, Mif4gd, Akt2, Srrt, Stxbp1, Prkdc, Eif4g2, Cpeb3, Hcfc1, Calr, Rps6kb2, Bcl2, Park7, Paip2, Ppp1ca, Lsm14a, Barhl2, Usp19, Ccdc88c, Dsg1a, Eif4e2, Eif4e3, Pcid2, Pum2, Creb1, Cdc73, Pum1, Eif2c1, Ireb2, Pten, Ybx1, Sox17, Bat3, Usp4, Npm1…
GO:0006184	GTP catabolic process	0.02716 ( 91 of 3350 genes )	0.00988 ( 336 of 34011 annotated genes )	2.02e-20	9.454e-17	Rhebl1, Rasa2, Tuba8, Myo9b, Arhgap15, Tuba1b, Ccr7, Gnb2l1, D630037F22Rik, Rab13, Mfn1, Bves, Gnai3, Sipa1l1, Rgs14, Vav1, Rabgap1, Akt2, Git2, Gna13, Acap2, Arhgap1, Tuba1a, Gfm1, Rhot2, Tbcd, Gng4, Scrib, Rab22a, Tbc1d5, Lrrk2, Bin1, Agap2, Gnl2, Arhgap9, Arl4a, Gnai2, Nckap1l, Rhou, Rap2c, Arhgef10l, Rab9, Rhot1, Gsk3b, Rab7, Eftud1, Nras, Gnas, Arfgef1, Arfgap3, Arhgap4, Ralgapa2, Rab21, Aca…
GO:0019220	regulation of phosphate m	0.04985 ( 167 of 3350 genes )	0.02490 ( 847 of 34011 annotated genes )	7.035e-20	3.293e-16	Lats1, Smad7, Ccr7, Gnb2l1, Csnk1d, Map3k5, Cep192, Hcls1, Ttn, Rapgef4, Bmp5, Ccnk, Dnajc10, Kat2b, Trp53, Apc, Lax1, Itsn1, Csk, Akt2, Pim1, Hmgcr, Nlrc5, Araf, Bcl2, Mphosph10, Ubn1, Kiss1r, Dusp7, Ppp1r9b, Tnk2, Itgb3, Ccl5, Map4k2, Lif, Hspa4, Agap2, Ptprc, Itga6, Gnai2, Rap2c, Ccdc88c, Samsn1, Vac14, Tmem188, Itgb2, Ccnl2, Madd, Igf1r, Gsk3b, Igbp1, Gnas, Prdx3, Map2k2, Ilk, Tnik, Sod1, Ppp…
GO:0030036	actin cytoskeleton organi	0.02866 ( 96 of 3350 genes )	0.01094 ( 372 of 34011 annotated genes )	7.2e-20	3.37e-16	Cfl1, Tmsb10, Phpt1, Wasl, Lats1, Pfn2, Ccr7, Arhgef18, Kctd13, Epb4.1l2, Hsp90b1, Ttn, Elmo1, Sipa1l1, Rock1, Flna, Clec2i, Ptk7, Tln1, Calr, Pfn4, Bcl2, Kiss1r, Evl, Dlg1, Ppp1r9b, Epb4.1, Diap1, Lcp1, Cul3, Grid2ip, Agap2, Coro1a, Nckap1l, Rhou, Myo1b, Wasf2, Tpm1, Arhgef10l, Daam1, Coro1c, Vasp, Ssh1, Llgl1, Ssh2, Foxp1, Spnb2, Capza1, Ezr, Arfgef1, Abr, Ilk, Tnik, Mon2, Rasa1, Prex1, Prkcd, …
GO:0051174	regulation of phosphorus	0.04985 ( 167 of 3350 genes )	0.02493 ( 848 of 34011 annotated genes )	7.955e-20	3.724e-16	Lats1, Smad7, Ccr7, Gnb2l1, Csnk1d, Map3k5, Cep192, Hcls1, Ttn, Rapgef4, Bmp5, Ccnk, Dnajc10, Kat2b, Trp53, Apc, Lax1, Itsn1, Csk, Akt2, Pim1, Hmgcr, Nlrc5, Araf, Bcl2, Mphosph10, Ubn1, Kiss1r, Dusp7, Ppp1r9b, Tnk2, Itgb3, Ccl5, Map4k2, Lif, Hspa4, Agap2, Ptprc, Itga6, Gnai2, Rap2c, Ccdc88c, Samsn1, Vac14, Tmem188, Itgb2, Ccnl2, Madd, Igf1r, Gsk3b, Igbp1, Gnas, Prdx3, Map2k2, Ilk, Tnik, Sod1, Ppp…
GO:0043068	positive regulation of pr	0.03612 ( 121 of 3350 genes )	0.01579 ( 537 of 34011 annotated genes )	2.108e-19	9.866e-16	Uaca, Stat5b, Chek2, Ercc3, Frzb, Ets1, Usp28, Psen1, Nfkbid, Ndufa13, Gnb2l1, Aldh1a3, Spn, Trp53bp2, Ldha, Ptpn6, Map3k5, Ddit3, Ambra1, H2-T23, Lrp6, Tspo, Trp53, Stk17b, Usp7, Sh3glb1, Apc, Rps3, H2-D1, Bik, Pik3r1, H2-K1, Bclaf1, Tap1, Prkdc, Rps6, Hmgcr, Gpx1, Stat1, Rnf41, Ctla4, Ctrb1, Dapk1, Scrib, Ccar1, Pycard, Zfp622, Cd27, Pvr, Lrrk2, Ncf2, 5730403B10Rik, Il10, Casp2, Ccl5, Neurod1, …
GO:0031329	regulation of cellular ca	0.02955 ( 99 of 3350 genes )	0.01164 ( 396 of 34011 annotated genes )	2.148e-19	1.005e-15	Mylip, Rasa2, Prkaa1, Zc3hav1, Myo9b, Arhgap15, Ubxn1, Smad7, Psen1, Hsd11b1, Ccr7, Gnb2l1, D630037F22Rik, Csnk1d, Atg7, Bves, Oxa1l, Sipa1l1, Dnajc10, Rgs14, Vav1, Psmd10, Rabgap1, Akt2, Git2, Acap2, Stub1, Arhgap1, Gpx1, Ppp1cb, Tbcd, Scrib, Ppp1ca, Tbc1d5, Lrrk2, Bin1, Ppp1r3b, Il10, Ahsa1, Agap2, Arhgap9, Nckap1l, Larp1, Dbi, Pgam1, Tpm1, Mad2l1, Arhgef10l, Rad23b, Trib2, Gsk3b, Arfgef1, Arfg…
GO:0043065	positive regulation of ap	0.03582 ( 120 of 3350 genes )	0.01564 ( 532 of 34011 annotated genes )	2.719e-19	1.273e-15	Uaca, Stat5b, Chek2, Ercc3, Frzb, Ets1, Usp28, Psen1, Nfkbid, Ndufa13, Gnb2l1, Aldh1a3, Spn, Trp53bp2, Ldha, Ptpn6, Map3k5, Ddit3, Ambra1, H2-T23, Lrp6, Tspo, Trp53, Stk17b, Usp7, Sh3glb1, Apc, Rps3, H2-D1, Bik, Pik3r1, H2-K1, Bclaf1, Tap1, Prkdc, Rps6, Hmgcr, Gpx1, Stat1, Rnf41, Ctla4, Ctrb1, Dapk1, Scrib, Ccar1, Pycard, Zfp622, Cd27, Pvr, Ncf2, 5730403B10Rik, Il10, Casp2, Ccl5, Neurod1, Rbm5, P…
GO:0040007	growth	0.04567 ( 153 of 3350 genes )	0.02232 ( 759 of 34011 annotated genes )	3.069e-19	1.437e-15	Stat5b, Ino80, Vps54, Wisp2, Prkcb, Rara, Frzb, Anapc2, Gnb2l1, 2400003C14Rik, Ube3a, Chd7, Cacna2d2, Safb, Trp53, Psap, Nipbl, Xrn2, Rtn4, Bcl2, Idh3g, Ppp1r9b, Mtap7, Rbpj, Il10, Agpat6, Tcfap2c, Ntrk3, Fxn, Adipor2, Sema3a, Barhl2, Ints1, Chrnd, Tlr2, Kat2a, Creb1, Brd8, Unc79, Foxp1, Pax7, Gnas, Arhgap4, Entpd5, Ilk, Mtpn, Sod1, 4932438A13Rik, Ing4, Pten, Ccl11, Igfbp3, Trpv2, Tgfb1, Sox17, N…
GO:0010942	positive regulation of ce	0.03672 ( 123 of 3350 genes )	0.01626 ( 553 of 34011 annotated genes )	3.228e-19	1.511e-15	Uaca, Stat5b, Chek2, Ercc3, Frzb, Ets1, Usp28, Psen1, Nfkbid, Ndufa13, Gnb2l1, Aldh1a3, Spn, Trp53bp2, Ldha, Ptpn6, Map3k5, Ddit3, Ambra1, H2-T23, Lrp6, Tspo, Trp53, Stk17b, Usp7, Sh3glb1, Apc, Rps3, H2-D1, Bik, Pik3r1, H2-K1, Bclaf1, Tap1, Prkdc, Rps6, Hmgcr, Gpx1, Stat1, Rnf41, Dapk1, Ctla4, Ctrb1, Scrib, Ccar1, Pycard, Zfp622, Cd27, Pvr, Lrrk2, Ncf2, 5730403B10Rik, Il10, Casp2, Ccl5, Neurod1, …
GO:0042254	ribosome biogenesis	0.01672 ( 56 of 3350 genes )	0.00459 ( 156 of 34011 annotated genes )	3.442e-19	1.611e-15	Rrp36, Rps24, Eri1, Dis3, Rps18, Eftud1, Rps25, Rps16, Ddx56, Nob1, Rrp1, Rrp1b, Mrto4, Fbl, Rplp0, Lsg1, Nhp2, Pten, Rpl7, Nop58, Rps7, Rpl11, Rpl24, Npm1, Exosc1, Nol8, Rps8, Nop56, Mina, Utp20, Rps14, Wbp11, Utp6, Rps19, Gnl3, Nop14, Rps2, Rpf1, Aatf, Pdcd11, Rpl5, Rps6, Pa2g4, Rps28, Rrn3, Ebna1bp2, Rpsa, Mphosph10, Sbds, Tsr1, Nop10, Brix1, Rps21, Gnl2, Emg1, Rps17,
GO:0002684	positive regulation of im	0.03075 ( 103 of 3350 genes )	0.01253 ( 426 of 34011 annotated genes )	5.357e-19	2.507e-15	Tyro3, Stat5b, Phpt1, Cd247, Prkcb, Rara, Mapkapk2, Psen1, Adam17, Ccr7, Adora3, Hsp90aa1, Spn, Ptpn6, C8a, Prkd2, Lgals8, Pecam1, Lgals1, Plcg1, H2-T23, Stat6, Il12rb1, Clec2i, Trp53, Itk, Il6st, Il2rg, Sell, Lax1, H2-D1, Csk, Masp2, Cd47, Prkch, H2-K1, Tap1, Ubash3a, Rnf31, Tgfbr2, Ctla4, Bcl2, Aqp3, Tmem173, Pycard, Ikzf1, Cd27, Pvr, Paxip1, Itgal, Itgb3, Ccl5, Trim30a, Coro1a, Ptprc, Nckap1l,…
GO:0016311	dephosphorylation	0.02478 ( 83 of 3350 genes )	0.00894 ( 304 of 34011 annotated genes )	5.494e-19	2.572e-15	Phpt1, Lmtk3, Sfi1, Rpap2, Rngtt, Rrp1b, Cdc25c, Nt5c, Ptpn6, Sacm1l, Cep192, Gba, Dusp19, Hsp90b1, Sbf1, Ptpn18, Ptp4a1, Mdp1, Acp2, Atp1a1, Ppp3ca, Dusp11, Ppp1cb, Pdp2, Bcl2, Mphosph10, Mtmr12, Ubn1, Ppp1ca, Dusp7, G6pc3, Dusp13, Ptp4a3, Ppp2r2a, Inpp4b, Dlg2, Ptprc, Nckap1l, Inpp5d, Tmem188, Ptprr, Ssh1, Igbp1, Ppp6r2, Ssh2, Iqgap1, Epm2a, Ptpn22, Ptpra, Ppp1r12a, Dusp27, Ppm1b, Prkcd, Pten, …
GO:0048468	cell development	0.06925 ( 232 of 3350 genes )	0.03993 ( 1358 of 34011 annotated genes )	7.592e-19	3.554e-15	Mycbp2, Uhmk1, Rara, Frzb, Ywhah, Smc1a, Bcl11b, Anapc2, Wee2, 2400003C14Rik, Cbfb, Sez6, Snw1, Ttn, Rapgef4, Bmp5, Atg7, Lgals1, Bves, Nfatc1, Rnf17, Cacna2d2, Sipa1l1, Rock1, Mbnl3, Flna, Tspo, Trp53, Vezf1, Apc, Akt2, Zhx2, Pde2a, Prkdc, Nipbl, Rps6, Tcf7l1, Rtn4, Msi2, Klk6, Bcl2, Hdac1, Evl, Picalm, Ppp1r9b, Mtap7, Rbpj, Cul3, Ccl5, Agpat6, Tcfap2c, Ntrk3, Lif, Fxn, Ptprc, Paf1, Sema3a, Barh…
GO:0010033	response to organic subst	0.06955 ( 233 of 3350 genes )	0.04019 ( 1367 of 34011 annotated genes )	8.459e-19	3.96e-15	Stat5b, Mylip, Hrh1, Zc3hav1, Otud5, Prkcb, Plcd1, Rara, Mapkapk2, Aff3, Lats1, Atp2a1, Sva, Dgkd, Ccr7, Tgtp1, Hsp90aa1, Dnmt3a, Atp2a2, Hcls1, Ddit3, Adrbk1, Ubr2, Kat2b, Il12rb1, Tcf7, Psap, Pde1b, Sell, Nr2c2, Duox1, Csk, Akt2, Pde2a, Stub1, Prkdc, Calcrl, Hmgcr, Nlrc5, Il17ra, Stat1, Ctrb1, Il21r, Bcl2, Pycard, Tbl1x, Strn3, Ppp1r9b, Col16a1, Ppp2r2a, 5730403B10Rik, Lancl2, Il10, Ccl5, Adipo…
GO:0033043	regulation of organelle o	0.03104 ( 104 of 3350 genes )	0.01282 ( 436 of 34011 annotated genes )	1.023e-18	4.787e-15	Cfl1, Tmsb10, Kdm3a, Phpt1, Mycbp2, Cep250, Ctcf, Wasl, Lats1, Brd7, Ywhah, Pfn2, Wbp7, Ube2b, Fis1, Cep192, Cdc23, Senp6, Nsmce2, Clec2i, Trp53, Psmd10, Apc, Bik, Mff, Dnm1l, 3200002M19Rik, Nipbl, Tbcd, Cdk11b, Kiss1r, Evl, Clip1, Dlg1, Paxip1, Bcor, Fxn, Coro1a, Nckap1l, Rnf4, Dnmt3b, Tpm1, Mad2l1, Arhgef10l, Pcid2, Terf1, Smc5, Ssh1, Foxp3, Golph3, Ssh2, Spnb2, Capza1, Arfgef1, Fgfr2, Map2k2, …
GO:0046034	ATP metabolic process	0.01612 ( 54 of 3350 genes )	0.00441 ( 150 of 34011 annotated genes )	1.273e-18	5.96e-15	Ino80, Ndufs1, Ercc3, Myo9b, Hltf, Ak1, Wrn, Atp2a1, Entpd5, Top1, Macf1, Hspa8, Hsp90aa1, Ascc3, Atp2a2, Atp5b, Ak2, Atp12a, Tgfb1, Ruvbl2, Atf7ip, Ldhd, Atp5a1, Aldoa, Atad1, Atp5o, Atp5g3, Atp1b3, Ddx3x, Atp5h, Psmc5, Helb, Atp10d, Myh10, Atp1a1, Ipo8, Tap1, Atp2c1, Abca8b, Atp1b1, Atp5e, Myh9, Atp6v1g1, Ralbp1, Ddx5, Atp6v1c1, Pex6, Rnf213, Psmc2, Ak3, Vps4b, Tnnt2, Abcc2, Nsf,
GO:0051336	regulation of hydrolase a	0.04388 ( 147 of 3350 genes )	0.02143 ( 729 of 34011 annotated genes )	1.514e-18	7.087e-15	Uaca, Zc3hav1, Myo9b, Plcd1, Birc6, Ccr7, Gnb2l1, Map3k5, Gpi1, Fis1, Cep192, Bves, Oxa1l, Sipa1l1, Dnajc10, Hbxip, Itk, Rps3, Rabgap1, Akt2, Gna13, Bcap31, Acap2, Arhgap1, Prol1, Mphosph10, Ubn1, Pycard, Cd27, Tbc1d5, Bin1, Rag1, Ahsa1, Ccl5, Agap2, Fnta, Rps6ka1, Ifnb1, Reck, Stfa2l1, Arhgef10l, Ints1, Terf1, Gsk3b, Igbp1, Arfgef1, Arhgap4, Ralgapa2, Prdx3, Nr4a1, Ngef, Acap1, Ppp1r12a, Arrb2, …
GO:0007265	Ras protein signal transd	0.02567 ( 86 of 3350 genes )	0.00961 ( 327 of 34011 annotated genes )	1.676e-18	7.843e-15	Rasa2, Myo9b, Arhgef3, Arhgap15, Ccr7, D630037F22Rik, Arhgef18, Kctd13, Usp8, Lat, Ttn, Obscn, Pecam1, Bves, Elmo1, Spata13, Sipa1l1, Rock1, Vav1, Arhgef11, Rabgap1, Itsn1, Akt2, Git2, Gna13, Acap2, Arhgdia, Arhgap1, Psd4, Scrib, Tbc1d5, Arhgef1, Cul3, Agap2, Nckap1l, Rhou, Rap2c, Wasf2, Arhgef10l, Arpp19, Gsk3b, Chuk, Nras, Als2cl, Arfgef1, Arfgap3, Arhgap4, Abr, Ralgapa2, Acap1, Ngef, Prex1, Ra…
GO:0044092	negative regulation of mo	0.04299 ( 144 of 3350 genes )	0.02102 ( 715 of 34011 annotated genes )	3.818e-18	1.787e-14	Phpt1, Lats1, Smad7, Nfkbid, Birc6, Gnb2l1, Oas1d, Gpi1, Cep192, Ddit3, Oxa1l, Kat2b, Hbxip, Flna, Nfkb1, Apc, Rps3, Lax1, Csk, Akt2, Pim1, Hmgcr, Nlrc5, Prol1, Mphosph10, Ubn1, Park7, Cd27, Dusp7, Rag1, Ccl5, Hspa4, Ptprc, Gnai2, Rps6ka1, Reck, Stfa2l1, Ints1, Terf1, Igf1r, Gsk3b, Igbp1, Irak2, Arfgef1, Prdx3, Nr4a1, Ilk, Ppp1r12a, Prkcd, Arrb2, Pten, Hdac4, Trim21, Rhoh, Bax, Notch1, Pttg1, Veg…
GO:0000377	RNA splicing, via transes	0.01164 ( 39 of 3350 genes )	0.00250 ( 85 of 34011 annotated genes )	3.991e-18	1.868e-14	Tra2a, Dhx38, Cdk13, Ptbp2, D11Bwg0517e, Srrm1, Aqr, Celf2, Prmt5, Hnrnpa1, Ddx39, Snw1, Sfswap, Rbmy1a1, Sf3a2, Npm1, Snrnp70, Cwc15, Hnrnpm, Celf1, U2af2, Srsf7, Bat1a, Mbnl1, Srpk2, Prpf8, Ptbp1, Srsf2ip, Sf3a1, Ddx5, Rbm22, Sfpq, Srsf9, Srsf10, Prpf31, Hnrnpa2b1, Rbm25, Rbm5, Zrsr2,
GO:0000398	nuclear mRNA splicing, vi	0.01164 ( 39 of 3350 genes )	0.00250 ( 85 of 34011 annotated genes )	3.991e-18	1.868e-14	Tra2a, Dhx38, Cdk13, Ptbp2, D11Bwg0517e, Srrm1, Aqr, Celf2, Prmt5, Hnrnpa1, Ddx39, Snw1, Sfswap, Rbmy1a1, Sf3a2, Npm1, Snrnp70, Cwc15, Hnrnpm, Celf1, U2af2, Srsf7, Bat1a, Mbnl1, Srpk2, Prpf8, Ptbp1, Srsf2ip, Sf3a1, Ddx5, Rbm22, Sfpq, Srsf9, Srsf10, Prpf31, Hnrnpa2b1, Rbm25, Rbm5, Zrsr2,
GO:0010648	negative regulation of ce	0.03552 ( 119 of 3350 genes )	0.01605 ( 546 of 34011 annotated genes )	6.512e-18	3.048e-14	Tyro3, Rasa2, Hspa5, Gabbr1, Prkaa1, Phpt1, Prkcb, Strap, Lats1, Frzb, Atxn7, Smad7, Psen1, Nfkbid, Skor1, Cav2, Npy2r, Spg20, Ube2b, Kctd13, Ptpn6, Gba, Ddit3, Rapgef4, Bmp5, Atad1, Gtf2h2, Dab1, Adrbk1, Ubr2, Rgs14, Lrp6, Trp53, Il6st, Rgs7, Psmd10, Apc, Csk, Stxbp1, Ubash3a, Nlrc5, Zmynd11, Stat1, Calr, Ubr1, Hdac1, Fbn2, Strn3, Npy5r, Ccl5, Cul3, Trim30a, Lif, Grid2ip, Neurod1, Ptprc, Gnai2, …
GO:0000375	RNA splicing, via transes	0.01164 ( 39 of 3350 genes )	0.00253 ( 86 of 34011 annotated genes )	6.632e-18	3.104e-14	Tra2a, Dhx38, Cdk13, Ptbp2, D11Bwg0517e, Srrm1, Aqr, Celf2, Prmt5, Hnrnpa1, Ddx39, Snw1, Sfswap, Rbmy1a1, Sf3a2, Npm1, Snrnp70, Cwc15, Hnrnpm, Celf1, U2af2, Srsf7, Bat1a, Mbnl1, Srpk2, Prpf8, Ptbp1, Srsf2ip, Sf3a1, Ddx5, Rbm22, Sfpq, Srsf9, Srsf10, Prpf31, Hnrnpa2b1, Rbm25, Rbm5, Zrsr2,
GO:0023057	negative regulation of si	0.03522 ( 118 of 3350 genes )	0.01594 ( 542 of 34011 annotated genes )	9.792e-18	4.584e-14	Tyro3, Rasa2, Hspa5, Gabbr1, Prkaa1, Phpt1, Prkcb, Strap, Lats1, Frzb, Atxn7, Smad7, Psen1, Nfkbid, Skor1, Cav2, Npy2r, Spg20, Ube2b, Kctd13, Ptpn6, Gba, Ddit3, Rapgef4, Bmp5, Atad1, Gtf2h2, Dab1, Adrbk1, Ubr2, Rgs14, Lrp6, Trp53, Il6st, Rgs7, Psmd10, Apc, Csk, Stxbp1, Ubash3a, Nlrc5, Zmynd11, Stat1, Calr, Ubr1, Hdac1, Fbn2, Strn3, Npy5r, Ccl5, Cul3, Trim30a, Lif, Grid2ip, Neurod1, Ptprc, Gnai2, …
GO:0070887	cellular response to chem	0.05701 ( 191 of 3350 genes )	0.03152 ( 1072 of 34011 annotated genes )	1.341e-17	6.277e-14	Usf2, Stat5b, Hrh1, Zc3hav1, Myo9b, Trpm4, Prkcb, Rara, Lats1, Sva, Elmo2, Ccr7, Tgtp1, Dnmt3a, Map3k5, Snw1, Ddit3, Npepps, Fos, Ubr2, Kat2b, Il12rb1, Trp53, Tcf7, Psap, Sell, Nr2c2, Duox1, Csk, Akt2, Pde2a, Stub1, Prkdc, Calcrl, Hmgcr, Nlrc5, Il17ra, Stat1, Il21r, Bcl2, Gsta1, Park7, Hdac1, Pycard, Gpx3, Ppp1r9b, Col16a1, 5730403B10Rik, Lancl2, Ccl5, Fxn, Adipor2, Hmgn3, Ptprc, Ifnb1, Itgb2, Re…
GO:0043254	regulation of protein com	0.01761 ( 59 of 3350 genes )	0.00541 ( 184 of 34011 annotated genes )	1.919e-17	8.984e-14	Tmsb10, Terf1, Raf1, Creb1, Wasl, Gsk3b, Lats1, Spnb2, Capza1, Pfn2, Arfgef1, Gnb2l1, Fam38a, Rasa1, Prex1, Prkcd, Ccl11, Tgfb1, Atf7ip, Capzb, Senp6, Actr3, Eif4ebp1, Bax, Add1, Clec2i, Trp53, Vegfa, Sh3glb1, Rictor, Apc, Bik, Ppm1a, Pfn1, Cdkn1b, Hjurp, Bclaf1, Stxbp1, Stub1, Hcfc1, Mapre1, Rrn3, Tbcd, Evl, Clip1, Dlg1, Rdx, Snx9, Fkbp4, Paxip1, Cand1, Coro1a, Csf2, Crbn, Nckap1l, Rnf4, Tmod3, …
GO:0007017	microtubule-based process	0.02657 ( 89 of 3350 genes )	0.01056 ( 359 of 34011 annotated genes )	2.478e-17	1.16e-13	Kif20a, Ino80, Chek2, Tubgcp3, Kif21b, Cep250, Tuba8, Kif2a, 1700019E19Rik, Tuba1b, Nuf2, Atxn7, Ift46, Csnk1d, Bub3, Ube2b, Cep68, Cep192, Dynlrb1, Senp6, Dync1h1, Rgs14, Flna, Tubgcp4, Sgol1, Apc, Ckap5, Nedd1, Nin, Xrn2, Tuba1a, Rhot2, Nefh, Tbcd, Lrrc50, Dync2h1, Gpsm2, Clip1, Mtap7, Chd3, Diap1, Kif5b, Rnf4, Actr10, Tubgcp6, Ccdc88c, Numa1, Terf1, Rhot1, Ranbp10, Gsk3b, Igbp1, Tubgcp5, Dctn3…
GO:0006470	protein dephosphorylation	0.01522 ( 51 of 3350 genes )	0.00423 ( 144 of 34011 annotated genes )	2.541e-17	1.19e-13	Tmem188, Ptprr, Phpt1, Ssh1, Igbp1, Ssh2, Rpap2, Rngtt, Epm2a, Ptpra, Ptpn22, Cdc25c, Ptpn6, Ppp1r12a, Prkcd, Ppm1b, Dusp27, Pten, Dusp19, Gba, Tgfb1, Ptpn18, Ppp2ca, Ptpn9, Ppp3cb, Ppp1cc, Ptp4a1, Dusp1, Mtm1, Eya3, Ppm1a, Dusp11, Ppp3ca, Ptprs, Ubash3b, Ptprq, Ppp1cb, Bcl2, Pdp2, Ywhae, Dusp10, Dusp7, Ppp1ca, Dusp13, Ppm1d, Ppm1g, Ptp4a3, Ppp2r2a, Ilkap, Ptprc, Ppp2cb,
GO:0032535	regulation of cellular co	0.03045 ( 102 of 3350 genes )	0.01300 ( 442 of 34011 annotated genes )	2.546e-17	1.192e-13	Ino80, Cfl1, Tmsb10, Wisp2, Wasl, Lats1, Frzb, Pfn2, Adam17, Anapc2, Spg20, Ndufa13, Gnb2l1, Eno1, Hsp90aa1, 2400003C14Rik, Usp47, Atp6v0e, Sbf1, Ppt1, Hsp90ab1, Clec2i, Trp53, Rbbp7, Psmd10, Vps24, Xrn2, Rtn4, Bcl2, Gng4, Smad4, Evl, Dlg1, Ppp1r9b, Robld3, Ntrk3, Fxn, Adipor2, Coro1a, Cyba, Sema3a, Nckap1l, Barhl2, Hbegf, Derl2, Tpm1, Tspyl2, Ssh1, Creb1, Ssh2, Spnb2, Capza1, Arfgef1, Arhgap4, E…
GO:0051056	regulation of small GTPas	0.02269 ( 76 of 3350 genes )	0.00829 ( 282 of 34011 annotated genes )	3.67e-17	1.718e-13	Rasa2, Myo9b, Arhgef3, Arhgap15, Ccr7, D630037F22Rik, Arhgef18, Kctd13, Ttn, Rapgef4, Obscn, Bves, Spata13, Sipa1l1, Vav1, Rabgap1, Itsn1, Akt2, Git2, Acap2, Arhgap1, Psd4, Scrib, Rasgrp1, Tbc1d5, Arhgef1, Cul3, Agap2, Rasgrp2, Nckap1l, Arhgef10l, Arpp19, Gsk3b, Garnl3, Als2cl, Arfgef1, Arfgap3, Arhgap4, Abr, Ralgapa2, Acap1, Ngef, Prex1, Rasa1, Bnip2, Ccl11, Ndel1, Sh2b2, Notch2, Pafah1b1, Rasa3…
GO:0042325	regulation of phosphoryla	0.04418 ( 148 of 3350 genes )	0.02243 ( 763 of 34011 annotated genes )	4.173e-17	1.953e-13	Lats1, Smad7, Ccr7, Gnb2l1, Csnk1d, Map3k5, Hcls1, Ttn, Rapgef4, Bmp5, Ccnk, Dnajc10, Kat2b, Trp53, Apc, Lax1, Itsn1, Csk, Akt2, Pim1, Hmgcr, Nlrc5, Araf, Bcl2, Kiss1r, Dusp7, Ppp1r9b, Tnk2, Itgb3, Ccl5, Map4k2, Lif, Hspa4, Agap2, Ptprc, Itga6, Gnai2, Rap2c, Ccdc88c, Samsn1, Vac14, Itgb2, Ccnl2, Madd, Igf1r, Gsk3b, Gnas, Prdx3, Map2k2, Ilk, Tnik, Sod1, Kidins220, Prkcd, Arrb2, Pten, Cd81, Igfbp3,…
GO:0009792	embryo development ending	0.03672 ( 123 of 3350 genes )	0.01729 ( 588 of 34011 annotated genes )	5.33e-17	2.495e-13	Col4a3bp, Cfl1, Pcdh12, Plcd1, Sp3, Psen1, Nsdhl, Birc6, Ubr3, Eno1, Rgma, Ube2b, Trp53bp2, Egln1, Setd2, Psmc3, Ttn, Chd7, Hsf1, Psmc4, Ambra1, Plcg1, Ece1, Lrp6, Trp53, Ptk7, Pitx2, N4bp2l2, Tcf7, Man2a1, Gna13, Prkdc, Nipbl, Hectd1, Abi1, Tgfbr2, Rrn3, Brd4, Cdk11b, Smad4, Scrib, Arnt, Dlg1, Runx1, Rbpj, Wdr19, Trim28, Il10, Cul3, Tcfap2c, Lif, Fxn, Hbegf, Tpm1, Dad1, Ints1, Casp8, Vezt, Vasp,…
GO:0009968	negative regulation of si	0.03284 ( 110 of 3350 genes )	0.01473 ( 501 of 34011 annotated genes )	6.67e-17	3.122e-13	Tyro3, Rasa2, Hspa5, Prkaa1, Phpt1, Prkcb, Strap, Lats1, Frzb, Atxn7, Smad7, Psen1, Nfkbid, Skor1, Cav2, Spg20, Ube2b, Kctd13, Ptpn6, Gba, Ddit3, Bmp5, Gtf2h2, Dab1, Adrbk1, Ubr2, Rgs14, Lrp6, Trp53, Il6st, Rgs7, Psmd10, Apc, Csk, Ubash3a, Nlrc5, Zmynd11, Stat1, Calr, Ubr1, Hdac1, Fbn2, Strn3, Ccl5, Cul3, Trim30a, Lif, Neurod1, Ptprc, Cdc42se1, Inpp5d, Cilp, Rela, Pik3ip1, Rgs1, Rph3al, Igf1r, Gs…
GO:0043085	positive regulation of ca	0.04358 ( 146 of 3350 genes )	0.02217 ( 754 of 34011 annotated genes )	7.98e-17	3.735e-13	Uaca, Zc3hav1, Myo9b, Plcd1, Ccr7, Gnb2l1, Map3k5, Fis1, Sipa1l1, Dnajc10, Itk, Rps3, Itsn1, Csk, Akt2, Gna13, Bcap31, Calcrl, Pim1, Arhgap1, Araf, Bcl2, Kiss1r, Pycard, Bin1, Itgb3, Ahsa1, Ccl5, Map4k2, Fxn, Agap2, Fnta, Ptprc, Gnai2, Ifnb1, Arhgef10l, Vac14, Terf1, Madd, Gsk3b, Gnas, Arhgap4, Ralgapa2, Map2k2, Ilk, Tnik, Sod1, Prkcd, Pten, Ccl11, Cd81, Igfbp3, Tgfb1, Ndel1, Casp9, Npm1, Adcy6, …
GO:0051247	positive regulation of pr	0.03104 ( 104 of 3350 genes )	0.01364 ( 464 of 34011 annotated genes )	1.059e-16	4.956e-13	Mylip, Hspa5, Uhmk1, Paip1, Lats1, Brd7, Smad7, Psen1, Adam17, Gnb2l1, Csnk1d, Rgma, Gba, Hcls1, Bmp5, Sqstm1, Pecam1, A930001N09Rik, Atg7, Trp53, Il6st, Psmd10, Fanci, Apc, Akt2, Pik3r1, Stub1, Nipbl, Rps6kb2, Araf, Bcl2, Smad4, Arnt, Lrrk2, Rad50, Paxip1, Tnk2, Itgb3, Ccl5, Trim30a, Lif, Fnta, Aimp2, Mgea5, Barhl2, Rap2c, Dnmt3b, Trib2, Tmem188, Lpcat1, Rnf111, Raf1, Ldb1, Foxp3, Gsk3b, Gnas, A…
GO:0006917	induction of apoptosis	0.02328 ( 78 of 3350 genes )	0.00879 ( 299 of 34011 annotated genes )	1.065e-16	4.985e-13	Uaca, Stat5b, Chek2, Ercc3, Ets1, Usp28, Ndufa13, Spn, Trp53bp2, Ptpn6, Map3k5, H2-T23, Trp53, Stk17b, Usp7, Sh3glb1, Rps3, Bik, H2-D1, H2-K1, Tap1, Gpx1, Stat1, Rnf41, Dapk1, Pycard, Zfp622, Cd27, Pvr, 5730403B10Rik, Casp2, Ptprc, Ifnb1, Ppp2r5c, Terf1, Casp8, Gsk3b, Hipk1, Nr4a1, Shisa5, Cd5, Stk4, Arrb2, Prkcd, Pten, Tgfb1, Cd3e, Casp9, Casp1, Bat3, Rab27a, Serinc3, Itm2b, Bax, Ei24, Ppp3cb, R…
GO:0051130	positive regulation of ce	0.03254 ( 109 of 3350 genes )	0.01464 ( 498 of 34011 annotated genes )	1.166e-16	5.458e-13	Cfl1, Wasl, Brd7, Pfn2, Anapc2, Ccr7, Gnb2l1, Hsp90aa1, 2400003C14Rik, Atad1, Ppt1, Ppp2r5d, Nsmce2, Gpm6a, Trp53, Ptk7, Sh3glb1, Sgip1, Apc, Bik, Mff, Dnm1l, Cd47, Bclaf1, Stub1, Nipbl, Calr, Smad4, Kiss1r, Evl, Dlg1, Clip1, Bin1, Paxip1, 1810046J19Rik, Cand1, Ntrk3, Lif, Fxn, Coro1a, Nckap1l, Mgea5, Fig4, Dnmt3b, Arhgef10l, Terf1, Smc5, Frmpd4, Creb1, Foxp3, Gsk3b, Rab8b, Abr, Cdc34, Scyl2, Ilk…
GO:0012502	induction of programmed c	0.02328 ( 78 of 3350 genes )	0.00882 ( 300 of 34011 annotated genes )	1.306e-16	6.114e-13	Uaca, Stat5b, Chek2, Ercc3, Ets1, Usp28, Ndufa13, Spn, Trp53bp2, Ptpn6, Map3k5, H2-T23, Trp53, Stk17b, Usp7, Sh3glb1, Rps3, Bik, H2-D1, H2-K1, Tap1, Gpx1, Stat1, Rnf41, Dapk1, Pycard, Zfp622, Cd27, Pvr, 5730403B10Rik, Casp2, Ptprc, Ifnb1, Ppp2r5c, Terf1, Casp8, Gsk3b, Hipk1, Nr4a1, Shisa5, Cd5, Stk4, Arrb2, Prkcd, Pten, Tgfb1, Cd3e, Casp9, Casp1, Bat3, Rab27a, Serinc3, Itm2b, Bax, Ei24, Ppp3cb, R…
GO:0000279	M phase	0.03015 ( 101 of 3350 genes )	0.01311 ( 446 of 34011 annotated genes )	1.41e-16	6.601e-13	Ino80, Chek2, Csnk1a1, Kif2a, Nuf2, Lats1, Birc6, Ywhah, Smc1a, Anapc2, Wee2, Chfr, Csnk1d, Dis3l2, Vrk1, Bub3, Ube2b, Cdc25c, Msh5, Cep192, Usp37, Cdc23, Senp6, Hsf1, Cdca2, Pds5a, Arl8a, Ccnk, Nsmce2, Ubr2, Rgs14, Flna, Anln, Sgol1, Apc, Ckap5, Nedd1, 3200002M19Rik, Nipbl, Rps6, Calr, Cdk11b, Arl8b, Stag2, Smc4, Ppp1ca, Apitd1, Nsun2, Rad50, Chd3, Setd8, Cul3, Lif, Cd2ap, Rnf4, Syce1, Mad2l1, P…
GO:0043009	chordate embryonic develo	0.03612 ( 121 of 3350 genes )	0.01711 ( 582 of 34011 annotated genes )	1.559e-16	7.298e-13	Col4a3bp, Cfl1, Pcdh12, Plcd1, Sp3, Psen1, Nsdhl, Birc6, Ubr3, Eno1, Rgma, Ube2b, Egln1, Setd2, Psmc3, Ttn, Chd7, Hsf1, Psmc4, Ambra1, Plcg1, Ece1, Lrp6, Trp53, Ptk7, Pitx2, N4bp2l2, Tcf7, Man2a1, Gna13, Prkdc, Nipbl, Hectd1, Abi1, Tgfbr2, Rrn3, Brd4, Cdk11b, Smad4, Scrib, Arnt, Dlg1, Runx1, Rbpj, Wdr19, Trim28, Il10, Cul3, Tcfap2c, Lif, Hbegf, Tpm1, Dad1, Ints1, Casp8, Vezt, Vasp, Ncor2, Kat2a, …
GO:0006730	one-carbon metabolic proc	0.02239 ( 75 of 3350 genes )	0.00832 ( 283 of 34011 annotated genes )	1.614e-16	7.554e-13	Kdm3a, Mat2a, Ctcf, Ehmt1, Mettl3, Wbp7, Dnmt3a, Kdm5d, Ube2b, Prmt5, Setd7, Setd2, Mll5, Ezh1, Atf7ip, Mett10d, Kdm2a, Car8, Mthfd1l, Wbscr22, 6430573F11Rik, Ilf3, Ash1l, Ahcyl1, Fbxo11, Nsun2, Paxip1, Setd8, Bcor, Rnmt, Eed, Dnmt3b, Trmt12, Mat2b, Setd1a, Fam119a, Satb1, Gsk3b, Gnas, Ash2l, Etf1, Fbl, Suv420h1, Kdm4c, Whsc1l1, Prmt3, Setd3, Mta2, Alkbh1, Hells, Pcmtd1, Brca1, Dph5, Jhdm1d, Tdrd…
GO:0006928	cellular component moveme	0.04716 ( 158 of 3350 genes )	0.02496 ( 849 of 34011 annotated genes )	1.791e-16	8.381e-13	Stat5b, Mylip, Phpt1, Myo9b, Trpm4, Ets1, Ift46, Elmo2, Ccr7, Adora3, Krit1, Gnb2l1, Hsp90aa1, Zranb1, Rapgef4, Rnf20, Spata13, Rock1, Tspo, Trp53, Akap4, Apc, Sell, Akt2, Gna13, Pkn1, Prkdc, Rtn4, Lrrc50, Bcl2, Kiss1r, Ppp1r9b, Itgb3, Cul3, Ccl5, Ntrk3, Ptprc, Itga6, Sema3a, Barhl2, Rap2c, Itgb2, Tlr2, Igf1r, Itga4, Gsk3b, Arhgap4, Map2k2, Nr4a1, Ilk, Prpf40a, Arrb2, Pten, Ccl11, Apob, Igfbp3, T…
GO:0018205	peptidyl-lysine modificat	0.01493 ( 50 of 3350 genes )	0.00426 ( 145 of 34011 annotated genes )	1.845e-16	8.637e-13	Setd1a, Usp22, Ldb1, Kat2a, Foxp3, Ctcf, Brd8, Brd7, Brd1, Ehmt1, Wbp7, Ep400, Crebbp, Csrp2bp, Ing4, Setd7, Setd2, Hdac4, Suv420h1, Ezh1, Tgfb1, Ruvbl2, Bat3, Setd3, Morf4l1, Nat15, Epc1, Kat2b, Myst3, Brca1, Eif5a, Tada3, Ep300, Hcfc1, Brd4, Lef1, Taf1, Paxip1, Setd8, Brpf3, Yeats4, Ogt, Ncoa3, Mll1, Mgea5, Ncoa1, Myst4, Por, Ing3, Mll3,
GO:0030217	T cell differentiation	0.01612 ( 54 of 3350 genes )	0.00491 ( 167 of 34011 annotated genes )	2.875e-16	1.346e-12	Stat5b, Satb1, Foxp3, Zeb1, Sp3, Rara, Clptm1, Nfkbid, Adam17, Bcl11b, Ccr7, Ptpn22, Hsp90aa1, Spn, Tgfb1, Cd3e, Chd7, Pknox1, Zbtb7b, Il4ra, Rhoh, Ppp3cb, Stat6, Il7r, Trp53, Itk, Vav1, Tcf7, Il2rg, Card11, Apc, B2m, Ap3b1, Prkdc, Rps6, Itpkb, Tgfbr2, Ctla4, Lig4, Bcl2, Ikzf1, Cd27, Dock2, Lef1, Ncor1, Rag1, Cd4, Lck, Zap70, Ptprc, Ctla2a, Nckap1l, Ifnb1, H2-Oa,
GO:0006811	ion transport	0.04955 ( 166 of 3350 genes )	0.02687 ( 914 of 34011 annotated genes )	3.148e-16	1.474e-12	Hrh1, Trpm4, Prkcb, Atp2a1, Slc22a18, Ywhah, Slc20a1, Trpm6, Atox1, Slc30a2, Slc23a1, Nipa1, Atp2a2, Clcn1, Ano6, Uqcr11, Stk39, Nfatc1, Cacna2d2, Tpcn1, Tspo, Akt2, Calcrl, Bcl2, Park7, Dhrs7c, Atp6v1g1, Itpr1, Kcnj12, Ccl5, Fxn, Ptprc, Kcnq2, Vdac3, Hcn1, Gabra6, Chrnd, Slc12a7, Slco6c1, Anxa6, Gnas, Gabra4, Clic1, Ryr3, Clcn7, Prkcd, Arrb2, Atp2b1, Atp6v0a2, Trpv2, Tgfb1, Slc9a8, Atp5a1, Atp5o…
GO:0030811	regulation of nucleotide	0.01881 ( 63 of 3350 genes )	0.00638 ( 217 of 34011 annotated genes )	3.729e-16	1.746e-12	Rasa2, Zc3hav1, Myo9b, Arhgap15, Gsk3b, Arhgap4, Arfgap3, Arfgef1, Ralgapa2, Ccr7, Gnb2l1, D630037F22Rik, Ngef, Acap1, Rasa1, Arrb2, Ccl11, Tnnc1, Ndel1, Pafah1b1, Bves, Pxk, Oxa1l, Sipa1l1, Rasa3, Dnajc10, Rgs14, Vav1, Snx13, Sema4d, Rictor, Rabgap1, Tbc1d14, S1pr1, Pip5k1a, Tbc1d23, Akt2, Git2, Acap2, Arhgap1, Epha5, Tbcd, Agfg1, Scrib, Rapgef2, Tbc1d15, Ralbp1, Tbc1d5, Lrrk2, Snx9, Bin1, Rap1g…
GO:0033121	regulation of purine nucl	0.01881 ( 63 of 3350 genes )	0.00638 ( 217 of 34011 annotated genes )	3.729e-16	1.746e-12	Rasa2, Zc3hav1, Myo9b, Arhgap15, Gsk3b, Arhgap4, Arfgap3, Arfgef1, Ralgapa2, Ccr7, Gnb2l1, D630037F22Rik, Ngef, Acap1, Rasa1, Arrb2, Ccl11, Tnnc1, Ndel1, Pafah1b1, Bves, Pxk, Oxa1l, Sipa1l1, Rasa3, Dnajc10, Rgs14, Vav1, Snx13, Sema4d, Rictor, Rabgap1, Tbc1d14, S1pr1, Pip5k1a, Tbc1d23, Akt2, Git2, Acap2, Arhgap1, Epha5, Tbcd, Agfg1, Scrib, Rapgef2, Tbc1d15, Ralbp1, Tbc1d5, Lrrk2, Snx9, Bin1, Rap1g…
GO:0001932	regulation of protein pho	0.04090 ( 137 of 3350 genes )	0.02064 ( 702 of 34011 annotated genes )	3.746e-16	1.754e-12	Lats1, Smad7, Ccr7, Gnb2l1, Csnk1d, Map3k5, Hcls1, Ttn, Rapgef4, Bmp5, Ccnk, Dnajc10, Kat2b, Trp53, Apc, Lax1, Csk, Akt2, Pim1, Hmgcr, Araf, Bcl2, Kiss1r, Dusp7, Ppp1r9b, Tnk2, Itgb3, Ccl5, Map4k2, Lif, Hspa4, Agap2, Ptprc, Gnai2, Rap2c, Ccdc88c, Samsn1, Itgb2, Ccnl2, Madd, Igf1r, Gsk3b, Gnas, Map2k2, Ilk, Tnik, Sod1, Kidins220, Prkcd, Arrb2, Pten, Cd81, Igfbp3, Tgfb1, Clcf1, Npm1, Akap13, Bax, P…
GO:0019725	cellular homeostasis	0.04090 ( 137 of 3350 genes )	0.02067 ( 703 of 34011 annotated genes )	4.224e-16	1.977e-12	Rims4, Trpm4, Prkcb, Plcd1, Rara, Sh3bgrl3, Atp2a1, Smad7, Krit1, Atox1, Slc30a2, Txnl1, Atp2a2, Sez6, Fis1, Aco1, Ddit3, Dnajc10, Tspo, Trp53, Apc, Akt2, Gna13, Bcap31, Hmgcr, Bcl2, Park7, Dhrs7c, Itpr1, Itgb3, Ccl5, Fxn, Hmgn3, Ptprc, Kcnq2, Abcc2, Sypl2, Chrnd, Slc12a7, Rhot1, Nab1, Gsr, Prdx3, Adam22, Clic1, Ilk, Ryr3, Txnrd3, Sod1, Pten, Tgfb1, Slc9a8, Npm1, Cacna1c, Bax, Kcnc2, Add1, Trpc2,…
GO:0046578	regulation of Ras protein	0.02090 ( 70 of 3350 genes )	0.00759 ( 258 of 34011 annotated genes )	4.362e-16	2.042e-12	Rasa2, Myo9b, Arhgef3, Arhgap15, Ccr7, D630037F22Rik, Arhgef18, Kctd13, Ttn, Obscn, Bves, Spata13, Sipa1l1, Vav1, Rabgap1, Itsn1, Akt2, Git2, Acap2, Arhgap1, Psd4, Scrib, Tbc1d5, Arhgef1, Cul3, Agap2, Nckap1l, Arhgef10l, Arpp19, Gsk3b, Als2cl, Arfgef1, Arfgap3, Arhgap4, Abr, Ralgapa2, Acap1, Ngef, Prex1, Rasa1, Ccl11, Ndel1, Sh2b2, Notch2, Pafah1b1, Rasa3, Bcr, Sema4d, Rictor, Pip5k1a, S1pr1, Tbc…
GO:0051249	regulation of lymphocyte	0.02090 ( 70 of 3350 genes )	0.00759 ( 258 of 34011 annotated genes )	4.362e-16	2.042e-12	Tyro3, Stat5b, Rara, Clptm1, Nfkbid, Ccr7, Id2, Hsp90aa1, Spn, Ptpn6, Lgals8, Lat, Lgals1, Stat6, Il12rb1, Clec2i, Il6st, Il2rg, Lax1, Csk, Cd47, Tgfbr2, Rnf41, Ctla4, Bcl2, Ikzf1, Cd27, Dlg1, Paxip1, Itgal, Ccl5, Il10, Coro1a, Ptprc, Il20rb, Ctla2a, Nckap1l, Ifnb1, Samsn1, Inpp5d, Pcid2, Foxp3, Zeb1, Ndfip1, Ptpn22, Cd5, Hsph1, Sit1, Cd86, Cd3e, Tgfb1, Clcf1, Zbtb7b, Il4ra, Il7r, Tnfrsf14, Card1…
GO:0001701	in utero embryonic develo	0.02567 ( 86 of 3350 genes )	0.01050 ( 357 of 34011 annotated genes )	5.393e-16	2.525e-12	Col4a3bp, Pcdh12, Plcd1, Sp3, Nsdhl, Birc6, Ubr3, Eno1, Ube2b, Egln1, Setd2, Psmc3, Ttn, Chd7, Hsf1, Psmc4, Plcg1, Trp53, Pitx2, N4bp2l2, Man2a1, Gna13, Tgfbr2, Rrn3, Brd4, Cdk11b, Smad4, Arnt, Runx1, Rbpj, Wdr19, Trim28, Cul3, Il10, Tcfap2c, Lif, Hbegf, Tpm1, Dad1, Ints1, Kat2a, Ncor2, Itga4, Foxp1, Tctn1, Fgfr2, Nasp, Stk4, Slc30a1, Chd8, Kidins220, Tshz3, Ybx1, Apob, Sox17, Smad2, Ndel1, Capn2…
GO:0010647	positive regulation of ce	0.04060 ( 136 of 3350 genes )	0.02055 ( 699 of 34011 annotated genes )	6.201e-16	2.903e-12	Zc3hav1, Trpm4, Prkcb, Slc20a1, Ccr7, Adora3, Csnk1d, Zranb1, Ube3a, Hcls1, Bmp5, Atg7, Lgals1, Flna, Nfkb1, Itsn1, Akt2, Rnf31, Hmgcr, Nlrc5, Klk6, Lgals9, Kiss1r, Cd27, Ubr5, Rbpj, Asxl2, Lancl2, Itgb3, Ccl5, Map4k2, Lif, Agap2, Ptprc, Larp1, Tlr2, Rela, Golph3, Igf1r, Chuk, Cdc73, Shisa5, Ilk, Prkcd, Arrb2, Kcp, Pten, Bnip2, Igfbp3, Tgfb1, Cbl, Clcf1, Pafah1b1, Notch1, Ddx17, Vegfa, Supt5h, Ca…
GO:0023056	positive regulation of si	0.04060 ( 136 of 3350 genes )	0.02055 ( 699 of 34011 annotated genes )	6.201e-16	2.903e-12	Zc3hav1, Trpm4, Prkcb, Slc20a1, Ccr7, Adora3, Csnk1d, Zranb1, Ube3a, Hcls1, Bmp5, Lgals1, Bves, Flna, Nfkb1, Itsn1, Akt2, Rnf31, Hmgcr, Nlrc5, Klk6, Lgals9, Kiss1r, Cd27, Ubr5, Rbpj, Asxl2, Lancl2, Itgb3, Ccl5, Map4k2, Lif, Agap2, Ptprc, Tlr2, Rela, Golph3, Igf1r, Chuk, Cdc73, Shisa5, Ilk, Prkcd, Arrb2, Kcp, Pten, Bnip2, Igfbp3, Tgfb1, Cbl, Clcf1, Pafah1b1, Notch1, Ddx17, Vegfa, Card11, Exoc4, Nc…
GO:0090066	regulation of anatomical	0.03403 ( 114 of 3350 genes )	0.01605 ( 546 of 34011 annotated genes )	8.553e-16	4.003e-12	Ino80, Hrh1, Cfl1, Tmsb10, Wisp2, Wasl, Lats1, Frzb, Pfn2, Adam17, Anapc2, Spg20, Ndufa13, Gnb2l1, Eno1, Hsp90aa1, 2400003C14Rik, Usp47, Atp6v0e, Sbf1, Ppt1, Hsp90ab1, Clec2i, Trp53, Rbbp7, Psmd10, Vps24, Hmgcr, Gpx1, Alox5, Xrn2, Rtn4, Bcl2, Gng4, Smad4, Evl, Dlg1, Ppp1r9b, Lrrk2, Robld3, Ntrk3, Fxn, Adipor2, Coro1a, Cyba, Sema3a, Nckap1l, Barhl2, Hbegf, Derl2, Tpm1, Tspyl2, Ssh1, Creb1, Ssh2, S…
GO:0006200	ATP catabolic process	0.01254 ( 42 of 3350 genes )	0.00329 ( 112 of 34011 annotated genes )	1.541e-15	7.215e-12	Ino80, Ercc3, Myo9b, Hltf, Wrn, Atp2a1, Top1, Macf1, Hspa8, Hsp90aa1, Ascc3, Atp2a2, Atp5b, Ruvbl2, Atf7ip, Atp5a1, Atad1, Atp5o, Ddx3x, Atp5h, Psmc5, Helb, Atp10d, Myh10, Atp1a1, Ipo8, Tap1, Atp2c1, Abca8b, Atp5e, Myh9, Atp6v1g1, Ralbp1, Ddx5, Atp6v1c1, Pex6, Rnf213, Psmc2, Vps4b, Tnnt2, Abcc2, Nsf,
GO:0050863	regulation of T cell acti	0.01642 ( 55 of 3350 genes )	0.00526 ( 179 of 34011 annotated genes )	1.862e-15	8.716e-12	Stat5b, Foxp3, Zeb1, Rara, Clptm1, Nfkbid, Ccr7, Ndfip1, Ptpn22, Hsp90aa1, Spn, Hsph1, Cd5, Sit1, Ptpn6, Cd86, Lgals8, Lat, Tgfb1, Cd3e, Zbtb7b, Lgals1, Il4ra, Il7r, Il12rb1, Clec2i, Il6st, Tnfrsf14, Il2rg, Card11, Lax1, Csk, Ap3b1, Cd47, Cblb, Itpkb, Tgfbr2, Ctla4, Ikzf1, Cd27, Dlg1, Itgal, Hspd1, Lck, Cd4, Ccl5, Zap70, Coro1a, Malt1, Ptprc, Ctla2a, Il20rb, Nckap1l, Ifnb1, H2-Oa,
GO:0000087	M phase of mitotic cell c	0.02299 ( 77 of 3350 genes )	0.00906 ( 308 of 34011 annotated genes )	2.103e-15	9.843e-12	Ino80, Chek2, Csnk1a1, Kif2a, Nuf2, Lats1, Birc6, Ywhah, Smc1a, Anapc2, Wee2, Chfr, Dis3l2, Vrk1, Bub3, Cdc25c, Cep192, Usp37, Cdc23, Cdca2, Pds5a, Arl8a, Ccnk, Nsmce2, Rgs14, Flna, Anln, Sgol1, Apc, Ckap5, Nedd1, 3200002M19Rik, Nipbl, Rps6, Cdk11b, Arl8b, Stag2, Smc4, Apitd1, Nsun2, Setd8, Cul3, Cd2ap, Mad2l1, Pcid2, Terf1, Smc5, Arpp19, 4922501C03Rik, Smc3, Cdc27, Dctn3, Fgfr2, Cltc, Dlgap5, Pd…
GO:0048285	organelle fission	0.02328 ( 78 of 3350 genes )	0.00926 ( 315 of 34011 annotated genes )	2.441e-15	1.142e-11	Ino80, Chek2, Csnk1a1, Kif2a, Nuf2, Lats1, Birc6, Ywhah, Smc1a, Anapc2, Wee2, Chfr, Dis3l2, Vrk1, Bub3, Cdc25c, Fis1, Cep192, Usp37, Cdc23, Cdca2, Pds5a, Arl8a, Ccnk, Nsmce2, Rgs14, Flna, Anln, Sgol1, Apc, Mff, Dnm1l, Ckap5, Nedd1, 3200002M19Rik, Nipbl, Rps6, Cdk11b, Arl8b, Stag2, Smc4, Apitd1, Nsun2, Setd8, Cul3, Cd2ap, Mad2l1, Pcid2, Terf1, Smc5, Arpp19, 4922501C03Rik, Smc3, Cdc27, Dctn3, Fgfr2…
GO:0043414	macromolecule methylation	0.01373 ( 46 of 3350 genes )	0.00391 ( 133 of 34011 annotated genes )	2.56e-15	1.198e-11	Setd1a, Kdm3a, Satb1, Ctcf, Gsk3b, Ehmt1, Mettl3, Gnas, Ash2l, Wbp7, Dnmt3a, Etf1, Prmt5, Setd7, Setd2, Suv420h1, Mll5, Ezh1, Atf7ip, Whsc1l1, Setd3, Prmt3, Mta2, Hells, Brca1, Tdrd1, Rbbp5, Ilf3, Dnmt1, Fbxo11, Ezh2, Kdm1a, Nsun2, Jarid2, Paxip1, Setd8, Bcor, Trmt61a, Rnmt, Ftsjd2, Eed, Mll1, Ogt, Mll2, Dnmt3b, Mll3,
GO:0009967	positive regulation of si	0.03761 ( 126 of 3350 genes )	0.01879 ( 639 of 34011 annotated genes )	2.594e-15	1.214e-11	Zc3hav1, Trpm4, Prkcb, Cav2, Adam17, Slc20a1, Ccr7, Adora3, Csnk1d, Aldh1a3, Zranb1, Ube3a, Ptpn6, Ctnna1, Prkd2, Hcls1, Nr2c1, Bmp5, Pecam1, S100a13, Lgals1, Spag9, Ppp2r5d, Ece1, Lrp6, Flna, Il6st, Akr1b3, Adamts20, Nfkb1, Itsn1, Akt2, Prkch, Rnf31, Hmgcr, Gpx1, Nlrc5, Slc44a2, Klk6, Lgals9, Bst2, Smad4, Zfp622, Cd27, Ubr5, Lrrk2, Robld3, Rbpj, Itgal, Eef1d, Asxl2, Mier1, Lancl2, Itgb3, Ccl5, M…
GO:0040011	locomotion	0.05104 ( 171 of 3350 genes )	0.02864 ( 974 of 34011 annotated genes )	2.855e-15	1.336e-11	Phpt1, Mycbp2, Myo9b, Trpm4, Ets1, Ift46, Ccl21a, Bcl11b, Elmo2, Ccr7, Adora3, Krit1, Gnb2l1, Hsp90aa1, Zranb1, Ttn, Rapgef4, Bves, Rnf20, Spata13, Rock1, Tspo, Trp53, Akap4, Apc, Sell, Akt2, Gna13, Pkn1, Prkdc, Lsp1, Rtn4, Bcl2, Kiss1r, Evl, Ppp1r9b, Itgb3, Cul3, Ccl5, Ntrk3, Ptprc, Itga6, Sema3a, Barhl2, Rap2c, Itgb2, Tlr2, Vasp, Itga4, Igf1r, Gsk3b, Foxp1, Nrcam, Arhgap4, Map2k2, Nr4a1, Ilk, P…
GO:0043623	cellular protein complex	0.02239 ( 75 of 3350 genes )	0.00876 ( 298 of 34011 annotated genes )	3.301e-15	1.545e-11	Tmsb10, Tuba8, Wasl, Tuba1b, Lats1, Pfn2, Hsp90aa1, Ttn, Senp6, Oxa1l, Cct2, Flna, Clec2i, Psmd10, Apc, Dnm1l, Ap2b1, Stxbp1, Stub1, Tuba1a, Calr, Tbcd, Lrrc50, Smad4, Evl, Picalm, Clip1, Dlg1, H2-Ke2, Diap1, Wdr19, Ccl5, Tmem48, Coro1a, Hspa4, Cyba, Dlg2, Nckap1l, Rnf4, Tpm1, Psmd9, Terf1, Capza1, Spnb2, Arfgef1, Pomp, Prex1, Rasa1, Prkcd, Ccl11, Capzb, Smad2, Tgfb1, Actr3, Add1, Rictor, Cdkn1b,…
GO:0032989	cellular component morpho	0.04119 ( 138 of 3350 genes )	0.02140 ( 728 of 34011 annotated genes )	3.334e-15	1.561e-11	Psmb10, Mycbp2, Csnk1a1, Myo9b, Asap1, Ywhah, Bcl11b, Anapc2, 2400003C14Rik, Zranb1, Fis1, Ttn, Atg7, Bves, Nfatc1, Sipa1l1, Rock1, Flna, Apc, Rtn4, Lrrc50, Bcl2, Evl, Picalm, Larp4, Mtap7, Rbpj, Wdr19, Rab8a, Itgb3, Cul3, Ntrk3, Lif, Fxn, Sema3a, Barhl2, Rufy3, Vasp, Creb1, Igf1r, Gsk3b, Ssh2, Foxp1, Tctn1, Nrcam, Arhgap4, Ngef, Ilk, Tnik, Sod1, Kidins220, Numb, Pten, Trpv2, Tgfb1, Sox17, Ndel1,…
GO:0010564	regulation of cell cycle	0.02299 ( 77 of 3350 genes )	0.00914 ( 311 of 34011 annotated genes )	3.703e-15	1.733e-11	Rfwd3, Ino80, Chek2, Ercc3, Mta3, Mapkapk2, Brd7, Usp28, Ywhah, Smc1a, Wee2, Chfr, Id2, Usp47, Bub3, Ube2b, Ptpn6, Cep192, Cdc23, Senp6, Hsf1, Nsmce2, Trp53, Apc, 3200002M19Rik, Rps6, Calr, Brd4, Cdk11b, Stag2, Casp2, Lif, Neurod1, Ptprc, Paf1, Usp19, Rnf4, Ppp2r5c, Mad2l1, Pcid2, Uimc1, Terf1, Smc5, Cdc73, Smc3, Fgfr2, Crebbp, Mdm4, Xpo1, Pkn2, Pten, Tgfb1, 6720463M24Rik, Obfc2a, Npm1, Rpl24, Me…
GO:0002694	regulation of leukocyte a	0.02239 ( 75 of 3350 genes )	0.00882 ( 300 of 34011 annotated genes )	4.841e-15	2.266e-11	Tyro3, Stat5b, Pram1, Rara, Clptm1, Nfkbid, Ccr7, Adora3, Id2, Hsp90aa1, Spn, Ptpn6, Lgals8, Lat, Lgals1, Stat6, Il12rb1, Clec2i, Il6st, Il2rg, Lax1, Csk, Cd47, Tgfbr2, Rnf41, Ctla4, Bcl2, Ikzf1, Cd27, Dlg1, Paxip1, Itgal, Ccl5, Il10, Coro1a, Ptprc, Il20rb, Ctla2a, Nckap1l, Ifnb1, Samsn1, Inpp5d, Pcid2, Foxp3, Zeb1, Abr, Ndfip1, Ptpn22, Cd5, Hsph1, Sit1, Cd86, Tgfb1, Cd3e, Clcf1, Zbtb7b, Il4ra, P…
GO:0051169	nuclear transport	0.02179 ( 73 of 3350 genes )	0.00847 ( 288 of 34011 annotated genes )	5.158e-15	2.414e-11	Uaca, Cfl1, Uhmk1, Cherp, Hsp90aa1, Hnrnpa1, Ddx39, Anp32a, Nupl1, Rgs14, Hspa9, Hsp90ab1, Flna, Trp53, Thoc1, Psmd10, Nup160, Ppp3ca, Pik3r1, Pde2a, Sdccag1, Rps28, Nxf1, Calr, Oprd1, l7Rn6, Rpsa, Tmem173, Smad4, Ahcyl1, Ubr5, Kpnb1, Srsf10, Xpo6, Neurod1, Xpo7, Snupn, Egr2, Tlr2, Arntl, Wrn, Gsk3b, Ogg1, Tnpo3, Spnb2, Nup155, Thoc5, Xpo1, Ppp1r12a, Lsg1, Nop58, Tgfb1, Akap13, Npm1, Creb3, Ppp1c…
GO:0044087	regulation of cellular co	0.02299 ( 77 of 3350 genes )	0.00926 ( 315 of 34011 annotated genes )	7.759e-15	3.632e-11	Tmsb10, Wasl, Lats1, Pfn2, Myo10, Ift46, Ccr7, Gnb2l1, Hsp90aa1, Atf7ip, Senp6, Eif4ebp1, Gpm6a, Clec2i, Trp53, Sh3glb1, Apc, Bik, Hjurp, Bclaf1, Stxbp1, Stub1, Hcfc1, Rrn3, Tbcd, Kiss1r, Evl, Clip1, Dlg1, Paxip1, 1810046J19Rik, Cand1, Coro1a, Crbn, Nckap1l, Rnf4, Tpm1, Arhgef10l, Terf1, Raf1, Ssh1, Creb1, Gsk3b, Ssh2, Capza1, Spnb2, Arfgef1, Macf1, Cdc34, Fam38a, Prex1, Rasa1, Prkcd, Ccl11, Pten…
GO:0061061	muscle structure developm	0.02746 ( 92 of 3350 genes )	0.01211 ( 412 of 34011 annotated genes )	7.807e-15	3.654e-11	Rara, Smad7, Cav2, Cd164, Egln1, Ttn, Mov10l1, Atg7, Lgals1, Epc1, Spag9, Cacna2d2, Mbnl3, Lrp6, Pitx2, Ankrd17, Nfatc3, Ppp3ca, Pik3r1, Mbnl1, Hmgcr, Gpx1, Tgfbr2, Foxp2, Mkl1, Bcl2, Myl6, Lrrk2, Bin1, Rbpj, Lif, Luc7l, Usp19, Tpm1, Chrnd, Zeb1, Gsk3b, Chuk, Foxp1, Stra6, Pax7, Fgfr2, Ilk, Pbrm1, H3f3a, Tshz3, Bnip2, Hdac4, Ybx1, Tnnc1, Igfbp3, Tgfb1, Sox17, Casp1, Foxk1, Setd3, Capn2, Actg1, My…
GO:0050851	antigen receptor-mediated	0.00955 ( 32 of 3350 genes )	0.00212 ( 72 of 34011 annotated genes )	1.216e-14	5.693e-11	Lax1, Nfatc2, Phpt1, Skap1, Cd247, Prkcb, Plekha1, Foxp3, Prkch, Fyn, Cblb, Ubash3a, Rnf31, Psen1, Ccr7, Ctla4, Bcl2, Ptpn22, Ptpn6, Klhl6, Prkd2, Sh2b2, Cd3e, Lck, Zap70, Malt1, Ptprc, Plcg1, Nckap1l, Clec2i, Itk, Kcnn4,
GO:0051129	negative regulation of ce	0.02179 ( 73 of 3350 genes )	0.00861 ( 293 of 34011 annotated genes )	1.347e-14	6.304e-11	Tmsb10, Kdm3a, Psen1, Dlg4, Ywhah, Pfn2, Spg20, Gnb2l1, Ube2b, Sez6, Cep192, Lgals1, Dab1, Eif4ebp1, Psmd10, Apc, Csk, 3200002M19Rik, Rtn4, Tbcd, Evl, Picalm, Lrrk2, Bcor, Coro1a, Fxn, Crbn, Sema3a, Dnmt3b, Tpm1, Mad2l1, Rufy3, Pcid2, Terf1, Raf1, Foxp3, Gsk3b, Capza1, Spnb2, Vim, Arhgap4, Arfgef1, Fgfr2, Ngef, Prkcd, Pten, Tgfb1, Capzb, Npm1, Pafah1b1, Ppp2ca, Add1, Brca1, Pfn1, Ppm1a, S1pr1, Op…
GO:0045786	negative regulation of ce	0.02149 ( 72 of 3350 genes )	0.00844 ( 287 of 34011 annotated genes )	1.396e-14	6.537e-11	Rfwd3, Chek2, Ercc3, Prkacb, Uhmk1, Ak1, Mapkapk2, Lats1, Ets1, Usp28, Smc1a, Chfr, Id2, Usp47, Bub3, Cep192, Mll5, Ddit3, Mov10l1, Hsf1, Kat2b, Trp53, Apc, 3200002M19Rik, Rps6, Calr, Sesn3, Bcl2, Gas2, Scrib, Dlg1, Casp2, Neurod1, Paf1, Ppp2r5c, Mad2l1, Pcid2, Uimc1, Terf1, Cdc73, Fgfr2, Macf1, Ilk, Mdm4, Rnf167, Ing4, Pten, Tgfb1, Foxk1, Obfc2a, Notch2, Rpl24, Gas2l3, Runx3, Brca1, Foxo4, Wac, …
GO:0045597	positive regulation of ce	0.03045 ( 102 of 3350 genes )	0.01426 ( 485 of 34011 annotated genes )	1.723e-14	8.064e-11	Stat5b, Rara, Frzb, Ets1, Anapc2, Ccr7, Id2, Hsp90aa1, 2400003C14Rik, Tesc, Hmg20b, Snw1, Rcor1, Mll5, Epc1, Spag9, Dab1, Rgs14, Tspo, Il6st, Il2rg, Adamts20, Apc, Pik3r1, Adamts9, Prkch, Tgfbr2, Rtn4, Bcl2, Smad4, Fbn2, Hdac1, Ikzf1, Cd27, Runx1, Asxl2, Itgb3, Ccl5, Ntrk3, Lif, Fxn, Neurod1, Ptprc, Nckap1l, Dnmt3b, Pcid2, Inpp5d, Rela, Creb1, Foxp3, Zeb1, Gnas, Vim, Ptpra, Clic1, Ilk, Tshz3, Num…
GO:0060284	regulation of cell develo	0.03224 ( 108 of 3350 genes )	0.01549 ( 527 of 34011 annotated genes )	1.817e-14	8.508e-11	Rara, Frzb, Psen1, Ywhah, Bcl11b, Anapc2, Wee2, Spg20, Id2, 2400003C14Rik, Sez6, Hmg20b, Snw1, Ctnna1, Rapgef4, Lgals1, Spag9, Dab1, Ppp2r5d, Sipa1l1, Ncs1, Rgs14, Mbnl3, Lrp6, Tspo, Trp53, Ptk7, Il6st, Dpysl2, Pik3r1, Zhx2, Prkch, Tcf7l1, Calr, Rtn4, Klk6, Bcl2, Smad4, Hdac1, Lrrk2, Ccl5, Ntrk3, Lif, Fxn, Neurod1, Sema3a, Barhl2, Dnmt3b, Fig4, Rufy3, Rela, Ssh1, Zeb1, Gsk3b, Ssh2, Nrcam, Vim, Ar…
GO:0002429	immune response-activatin	0.01045 ( 35 of 3350 genes )	0.00253 ( 86 of 34011 annotated genes )	1.88e-14	8.799e-11	Tlr2, Phpt1, Skap1, Cd247, Prkcb, Foxp3, Psen1, Ccr7, Ptpn22, Ptpn6, Mill2, Klhl6, Prkd2, Sh2b2, Cd3e, Plcg1, Clec2i, Itk, Lax1, Csk, Nfatc2, Plekha1, Fyn, Prkch, Cblb, Ubash3a, Rnf31, Ctla4, Bcl2, Lck, Zap70, Malt1, Ptprc, Nckap1l, Kcnn4,
GO:0006281	DNA repair	0.02299 ( 77 of 3350 genes )	0.00941 ( 320 of 34011 annotated genes )	1.912e-14	8.95e-11	Rfwd3, Ino80, Chek2, Ercc3, Recql, Ino80d, Usp28, Smc1a, Usp47, Ube2b, Msh5, Polb, Gtf2h2, Nsmce2, Trp53, Usp7, Rnf168, Fanci, Atrx, Rps3, Rad54l, Stub1, Prkdc, Xrn2, Smc4, Apitd1, Smg1, Rad50, Paxip1, Trim28, Supt16h, Lig3, Rad23b, Uimc1, Baz1b, Smc5, Parp2, Wrn, Ube2d3, Ogg1, Smc3, Poli, Ascc3, Sod1, Ddx1, C230052I12Rik, Rad21, Ssrp1, Ruvbl2, Atrip, Morf4l1, Obfc2a, Setx, Npm1, Ercc5, Xab2, Alk…
GO:0048870	cell motility	0.04388 ( 147 of 3350 genes )	0.02385 ( 811 of 34011 annotated genes )	1.923e-14	9.001e-11	Phpt1, Myo9b, Trpm4, Ets1, Ift46, Elmo2, Ccr7, Adora3, Krit1, Gnb2l1, Hsp90aa1, Zranb1, Rapgef4, Rnf20, Spata13, Rock1, Tspo, Trp53, Akap4, Apc, Sell, Akt2, Gna13, Pkn1, Prkdc, Rtn4, Bcl2, Kiss1r, Ppp1r9b, Itgb3, Cul3, Ccl5, Ntrk3, Ptprc, Itga6, Sema3a, Barhl2, Rap2c, Itgb2, Tlr2, Igf1r, Itga4, Gsk3b, Arhgap4, Map2k2, Nr4a1, Ilk, Prpf40a, Arrb2, Pten, Ccl11, Apob, Igfbp3, Tgfb1, Sox17, Ndel1, Paf…
GO:0051674	localization of cell	0.04388 ( 147 of 3350 genes )	0.02385 ( 811 of 34011 annotated genes )	1.923e-14	9.001e-11	Phpt1, Myo9b, Trpm4, Ets1, Ift46, Elmo2, Ccr7, Adora3, Krit1, Gnb2l1, Hsp90aa1, Zranb1, Rapgef4, Rnf20, Spata13, Rock1, Tspo, Trp53, Akap4, Apc, Sell, Akt2, Gna13, Pkn1, Prkdc, Rtn4, Bcl2, Kiss1r, Ppp1r9b, Itgb3, Cul3, Ccl5, Ntrk3, Ptprc, Itga6, Sema3a, Barhl2, Rap2c, Itgb2, Tlr2, Igf1r, Itga4, Gsk3b, Arhgap4, Map2k2, Nr4a1, Ilk, Prpf40a, Arrb2, Pten, Ccl11, Apob, Igfbp3, Tgfb1, Sox17, Ndel1, Paf…
GO:0050865	regulation of cell activa	0.02299 ( 77 of 3350 genes )	0.00944 ( 321 of 34011 annotated genes )	2.283e-14	1.069e-10	Tyro3, Stat5b, Pram1, Rara, Clptm1, Nfkbid, Ccr7, Adora3, Id2, Hsp90aa1, Spn, Ptpn6, Lgals8, Lat, Lgals1, Stat6, Il12rb1, Clec2i, Il6st, Il2rg, Lax1, Csk, Cd47, Tgfbr2, Rnf41, Ctla4, Bcl2, Ikzf1, Cd27, Dlg1, Paxip1, Itgal, Ccl5, Il10, Coro1a, Ptprc, Il20rb, Ctla2a, Rps6ka1, Nckap1l, Ifnb1, Samsn1, Inpp5d, Pcid2, Foxp3, Zeb1, Abr, Ndfip1, Ptpn22, Cd5, Hsph1, Sit1, Cd86, Prkcd, Tgfb1, Cd3e, Clcf1, …
GO:0051098	regulation of binding	0.02806 ( 94 of 3350 genes )	0.01273 ( 433 of 34011 annotated genes )	2.472e-14	1.157e-10	Rhebl1, Prkcb, Rara, Smad7, Psen1, Nfkbid, Krit1, Eno1, Id2, Tax1bp1, Egln1, Prkd2, Ddit3, Runx1t1, Ikbkb, Crtc3, Spag9, Lrp6, Hsp90ab1, Flna, Pitx2, Usp7, Psmd10, Rps3, Hjurp, Prkch, Foxn3, Rnf31, Pim1, Nlrc5, Crebzf, Foxp2, Nlrc3, Brd4, Bcl2, Tmem173, Smad4, Park7, Pycard, Epb4.1, Calm1, Il10, Hspa4, Neurod1, Hmgn3, Crbn, Trib2, Itgb2, Tlr2, Rela, Foxp3, Gsk3b, Foxp1, Irak2, Crebbp, Foxo1, Prdx…
GO:0006913	nucleocytoplasmic transpo	0.02119 ( 71 of 3350 genes )	0.00835 ( 284 of 34011 annotated genes )	2.564e-14	1.2e-10	Uaca, Cfl1, Uhmk1, Cherp, Hsp90aa1, Hnrnpa1, Ddx39, Anp32a, Nupl1, Rgs14, Hspa9, Hsp90ab1, Flna, Trp53, Thoc1, Psmd10, Nup160, Ppp3ca, Pik3r1, Pde2a, Sdccag1, Rps28, Nxf1, Calr, Oprd1, l7Rn6, Rpsa, Tmem173, Smad4, Ahcyl1, Ubr5, Kpnb1, Srsf10, Xpo6, Neurod1, Xpo7, Snupn, Egr2, Tlr2, Arntl, Gsk3b, Ogg1, Spnb2, Tnpo3, Nup155, Thoc5, Xpo1, Ppp1r12a, Lsg1, Nop58, Tgfb1, Akap13, Npm1, Creb3, Ppp1cc, Me…
GO:0000122	negative regulation of tr	0.03254 ( 109 of 3350 genes )	0.01579 ( 537 of 34011 annotated genes )	2.69e-14	1.259e-10	Strap, Sp3, Rara, Smad7, Psen1, Ehmt1, Skor1, Sap30, Id2, Dnmt3a, Prmt5, Ezh1, Nr2c1, Atf7ip, A930001N09Rik, Trim27, Epc1, Phf21a, Mina, Cops2, Stat6, Trp53, Pitx2, Rbbp7, Psmd10, Nfkb1, Zhx2, Pde2a, Nipbl, Foxn3, Zbtb20, Calr, Foxp2, Hdac1, Ikzf1, Tbl1x, Strn3, Rbpj, Per1, Zhx1, Trim28, Setd8, Bcor, Paf1, Dnmt3b, Hivep1, Irf3, Ncor2, Satb1, Foxp3, Zeb1, Igbp1, Foxp1, Cdc73, Fgfr2, Crebbp, Foxo1,…
GO:0000280	nuclear division	0.02179 ( 73 of 3350 genes )	0.00873 ( 297 of 34011 annotated genes )	2.844e-14	1.331e-10	Ino80, Chek2, Csnk1a1, Kif2a, Nuf2, Lats1, Birc6, Ywhah, Smc1a, Anapc2, Wee2, Chfr, Dis3l2, Vrk1, Bub3, Cdc25c, Cep192, Usp37, Cdc23, Cdca2, Pds5a, Arl8a, Ccnk, Nsmce2, Rgs14, Flna, Anln, Sgol1, Apc, Ckap5, Nedd1, 3200002M19Rik, Nipbl, Rps6, Cdk11b, Arl8b, Stag2, Smc4, Apitd1, Nsun2, Setd8, Cul3, Cd2ap, Mad2l1, Pcid2, Terf1, Smc5, Arpp19, 4922501C03Rik, Cdc27, Smc3, Dctn3, Fgfr2, Cltc, Pds5b, Nek…
GO:0007067	mitosis	0.02179 ( 73 of 3350 genes )	0.00873 ( 297 of 34011 annotated genes )	2.844e-14	1.331e-10	Ino80, Chek2, Csnk1a1, Kif2a, Nuf2, Lats1, Birc6, Ywhah, Smc1a, Anapc2, Wee2, Chfr, Dis3l2, Vrk1, Bub3, Cdc25c, Cep192, Usp37, Cdc23, Cdca2, Pds5a, Arl8a, Ccnk, Nsmce2, Rgs14, Flna, Anln, Sgol1, Apc, Ckap5, Nedd1, 3200002M19Rik, Nipbl, Rps6, Cdk11b, Arl8b, Stag2, Smc4, Apitd1, Nsun2, Setd8, Cul3, Cd2ap, Mad2l1, Pcid2, Terf1, Smc5, Arpp19, 4922501C03Rik, Cdc27, Smc3, Dctn3, Fgfr2, Cltc, Pds5b, Nek…
GO:0022008	neurogenesis	0.05045 ( 169 of 3350 genes )	0.02896 ( 985 of 34011 annotated genes )	3.41e-14	1.596e-10	Mycbp2, Uhmk1, Rara, Ywhah, Bcl11b, Anapc2, Hsp90aa1, 2400003C14Rik, Sez6, Snw1, Rapgef4, Atg7, Lgals1, Sipa1l1, Cops2, Tspo, Trp53, Tcf7, Ppia, Apc, Akt2, Zhx2, Psd4, Tcf7l1, Rtn4, Klk6, Bcl2, Hdac1, Evl, Picalm, Ppp1r9b, Rbpj, Ccl5, Tcfap2c, Ntrk3, Lif, Fxn, Sema3a, Barhl2, Hcn1, Rufy3, Rela, Vasp, Creb1, Igf1r, Zeb1, Nab1, Gsk3b, Ssh2, Foxp1, Tctn1, Pax7, Nrcam, Arhgap4, Ngef, Ilk, Adam22, Tni…
GO:0048646	anatomical structure form	0.04269 ( 143 of 3350 genes )	0.02314 ( 787 of 34011 annotated genes )	3.587e-14	1.679e-10	Bai2, Prkcb, Plcd1, Sp3, Ets1, Krit1, Gpi1, Tbx6, Ttn, Pde3b, Rock1, Flna, Trp53, Vezf1, Gna13, Prkdc, Calcrl, Stat1, Rtn4, Hdac1, Erap1, Rbpj, Wdr19, Rab8a, Ccl5, Cul3, Tcfap2c, Lif, Paf1, Itgb2, Vasp, Kat2a, Gsk3b, Foxp1, Tctn1, Cdc73, Nr4a1, Ilk, Pten, Ccl11, Sox17, Pknox1, Med12, Pafah1b1, Capn2, Actg1, Add1, Col8a2, Notch1, Vegfa, Foxo4, Ift172, Srpk2, Stab1, B4galt1, Fkbp1a, Pik3r6, Leo1, D…
GO:0006812	cation transport	0.03940 ( 132 of 3350 genes )	0.02076 ( 706 of 34011 annotated genes )	3.927e-14	1.838e-10	Hrh1, Trpm4, Prkcb, Atp2a1, Ywhah, Slc20a1, Trpm6, Atox1, Slc30a2, Slc23a1, Nipa1, Atp2a2, Uqcr11, Stk39, Nfatc1, Cacna2d2, Tpcn1, Tspo, Akt2, Calcrl, Bcl2, Park7, Dhrs7c, Atp6v1g1, Itpr1, Kcnj12, Ccl5, Ptprc, Kcnq2, Hcn1, Chrnd, Slc12a7, Anxa6, Gnas, Ryr3, Arrb2, Atp2b1, Atp6v0a2, Trpv2, Tgfb1, Slc9a8, Atp5a1, Atp5o, Cacna1c, Bax, Kcnc2, Atp1b3, Atp6v1d, Trpc2, Cox7c, Homer1, Atp2c1, Atp1b1, Fkb…
GO:0043087	regulation of GTPase acti	0.01642 ( 55 of 3350 genes )	0.00562 ( 191 of 34011 annotated genes )	3.977e-14	1.862e-10	Rasa2, Myo9b, Arhgap15, Gsk3b, Arhgap4, Arfgap3, Arfgef1, Ralgapa2, Ccr7, Gnb2l1, D630037F22Rik, Ngef, Acap1, Rasa1, Arrb2, Ccl11, Ndel1, Pafah1b1, Bves, Sipa1l1, Rasa3, Rgs14, Vav1, Snx13, Sema4d, Rictor, Rabgap1, Tbc1d14, S1pr1, Pip5k1a, Tbc1d23, Akt2, Git2, Acap2, Arhgap1, Epha5, Tbcd, Agfg1, Scrib, Rapgef2, Tbc1d15, Ralbp1, Tbc1d5, Lrrk2, Snx9, Bin1, Rap1gds1, Gmip, Agap2, Arhgap9, Nckap1l, T…
GO:0030030	cell projection organizat	0.04209 ( 141 of 3350 genes )	0.02276 ( 774 of 34011 annotated genes )	4.412e-14	2.065e-10	Mycbp2, Myo9b, Uhmk1, Wasl, Asap1, Ywhah, Ift46, Bcl11b, Anapc2, Ccr7, Hsp90aa1, 2400003C14Rik, Sez6, Rapgef4, Atg7, Lgals1, Spata13, Sipa1l1, Rock1, Flna, Akap4, Apc, Rtn4, Klk6, Lrrc50, Bcl2, Evl, Picalm, Ppp1r9b, Wdr19, Rab8a, Itgb3, Ccl5, Ntrk3, Lif, Fxn, Itga6, Sema3a, Barhl2, Rufy3, Vasp, Creb1, Igf1r, Gsk3b, Ssh2, Foxp1, Tctn1, Nrcam, Arhgap4, Ngef, Ilk, Tnik, Sod1, Kidins220, Prkcd, Numb,…
GO:0006140	regulation of nucleotide	0.02448 ( 82 of 3350 genes )	0.01053 ( 358 of 34011 annotated genes )	5.14e-14	2.406e-10	Rasa2, Gabbr1, Zc3hav1, Myo9b, Arhgap15, Hsd11b1, Npy2r, Ccr7, Gnb2l1, D630037F22Rik, Bves, Gnai3, Oxa1l, Sipa1l1, Dnajc10, Rgs14, Flna, Vav1, Rabgap1, Akt2, Git2, Gna13, Acap2, Pde2a, Calcrl, Arhgap1, Oprd1, Tbcd, Scrib, Tbc1d5, Lrrk2, Bin1, Ahsa1, Agap2, Arhgap9, Gnai2, Nckap1l, Pgam1, Tpm1, Arhgef10l, S1pr4, Gsk3b, Gnas, Arfgap3, Arfgef1, Arhgap4, Ralgapa2, Acap1, Ngef, Rasa1, Arrb2, Ccl11, Tn…
GO:0048699	generation of neurons	0.04776 ( 160 of 3350 genes )	0.02708 ( 921 of 34011 annotated genes )	5.716e-14	2.676e-10	Mycbp2, Uhmk1, Rara, Ywhah, Bcl11b, Anapc2, Hsp90aa1, 2400003C14Rik, Sez6, Snw1, Rapgef4, Atg7, Lgals1, Sipa1l1, Cops2, Tspo, Trp53, Tcf7, Ppia, Apc, Zhx2, Psd4, Tcf7l1, Rtn4, Klk6, Bcl2, Hdac1, Evl, Picalm, Ppp1r9b, Rbpj, Ccl5, Tcfap2c, Ntrk3, Lif, Fxn, Sema3a, Barhl2, Hcn1, Rufy3, Rela, Vasp, Creb1, Igf1r, Zeb1, Gsk3b, Ssh2, Foxp1, Tctn1, Pax7, Nrcam, Arhgap4, Ngef, Ilk, Tnik, Sod1, Kidins220, …
GO:0002768	immune response-regulatin	0.01045 ( 35 of 3350 genes )	0.00262 ( 89 of 34011 annotated genes )	6.451e-14	3.019e-10	Tlr2, Phpt1, Skap1, Cd247, Prkcb, Foxp3, Psen1, Ccr7, Ptpn22, Ptpn6, Mill2, Klhl6, Prkd2, Sh2b2, Cd3e, Plcg1, Clec2i, Itk, Lax1, Csk, Nfatc2, Plekha1, Fyn, Prkch, Cblb, Ubash3a, Rnf31, Ctla4, Bcl2, Lck, Zap70, Malt1, Ptprc, Nckap1l, Kcnn4,
GO:0016477	cell migration	0.04090 ( 137 of 3350 genes )	0.02199 ( 748 of 34011 annotated genes )	6.647e-14	3.111e-10	Myo9b, Trpm4, Ets1, Elmo2, Ccr7, Adora3, Krit1, Gnb2l1, Hsp90aa1, Zranb1, Rapgef4, Rnf20, Spata13, Rock1, Tspo, Trp53, Apc, Sell, Akt2, Gna13, Pkn1, Prkdc, Rtn4, Bcl2, Kiss1r, Ppp1r9b, Itgb3, Ccl5, Cul3, Ntrk3, Ptprc, Itga6, Sema3a, Barhl2, Rap2c, Itgb2, Tlr2, Igf1r, Itga4, Gsk3b, Arhgap4, Nr4a1, Ilk, Prpf40a, Arrb2, Pten, Ccl11, Igfbp3, Tgfb1, Sox17, Ndel1, Pafah1b1, Il16, Cer1, Bax, Notch1, Amo…
GO:0006475	internal protein amino ac	0.01194 ( 40 of 3350 genes )	0.00332 ( 113 of 34011 annotated genes )	6.791e-14	3.179e-10	Usp22, Ldb1, Kat2a, Foxp3, Ctcf, Brd8, Brd7, Brd1, Ep400, Crebbp, Csrp2bp, Asl, Ing4, Tgfb1, Ruvbl2, Bat3, Morf4l1, Nat15, Epc1, Kat2b, Myst3, Brca1, Mdh2, Tada3, Ep300, Hcfc1, Brd4, Lef1, Taf1, Paxip1, Brpf3, Yeats4, Mll1, Ncoa3, Ogt, Mgea5, Myst4, Ncoa1, Por, Ing3,
GO:0071310	cellular response to orga	0.04179 ( 140 of 3350 genes )	0.02273 ( 773 of 34011 annotated genes )	8.648e-14	4.048e-10	Stat5b, Hrh1, Zc3hav1, Prkcb, Rara, Lats1, Sva, Ccr7, Tgtp1, Dnmt3a, Ddit3, Ubr2, Kat2b, Il12rb1, Tcf7, Psap, Nr2c2, Duox1, Csk, Akt2, Pde2a, Stub1, Prkdc, Calcrl, Hmgcr, Nlrc5, Il17ra, Stat1, Il21r, Bcl2, Pycard, Ppp1r9b, Col16a1, 5730403B10Rik, Lancl2, Ccl5, Adipor2, Hmgn3, Ptprc, Ifnb1, Rela, Creb1, Zeb1, Irak2, Zc3h15, Nr4a1, Prkcd, Tgfb1, Casp9, Pafah1b1, Adcy6, Cer1, Trim24, Bax, Myog, Brca…
GO:0032270	positive regulation of ce	0.02776 ( 93 of 3350 genes )	0.01279 ( 435 of 34011 annotated genes )	8.861e-14	4.148e-10	Hspa5, Uhmk1, Paip1, Lats1, Brd7, Smad7, Psen1, Adam17, Gnb2l1, Csnk1d, Rgma, Gba, Hcls1, Bmp5, Sqstm1, Pecam1, Atg7, Trp53, Il6st, Psmd10, Fanci, Akt2, Pik3r1, Stub1, Nipbl, Rps6kb2, Araf, Bcl2, Smad4, Arnt, Lrrk2, Rad50, Paxip1, Tnk2, Itgb3, Ccl5, Lif, Fnta, Aimp2, Mgea5, Barhl2, Rap2c, Dnmt3b, Trib2, Tmem188, Rnf111, Raf1, Foxp3, Gsk3b, Gnas, Arfgef1, Ccnd2, Ndfip1, Prkcd, Arrb2, Pten, Cd81, H…
GO:0033124	regulation of GTP catabol	0.01642 ( 55 of 3350 genes )	0.00573 ( 195 of 34011 annotated genes )	1.029e-13	4.818e-10	Rasa2, Myo9b, Arhgap15, Gsk3b, Arhgap4, Arfgap3, Arfgef1, Ralgapa2, Ccr7, Gnb2l1, D630037F22Rik, Ngef, Acap1, Rasa1, Arrb2, Ccl11, Ndel1, Pafah1b1, Bves, Sipa1l1, Rasa3, Rgs14, Vav1, Snx13, Sema4d, Rictor, Rabgap1, Tbc1d14, S1pr1, Pip5k1a, Tbc1d23, Akt2, Git2, Acap2, Arhgap1, Epha5, Tbcd, Agfg1, Scrib, Rapgef2, Tbc1d15, Ralbp1, Tbc1d5, Lrrk2, Snx9, Bin1, Rap1gds1, Gmip, Agap2, Arhgap9, Nckap1l, T…
GO:0034660	ncRNA metabolic process	0.01910 ( 64 of 3350 genes )	0.00732 ( 249 of 34011 annotated genes )	1.21e-13	5.664e-10	Rps24, Dis3, Tars2, Gars, Ddx56, Nob1, Rars2, Rrp1b, Nhp2, Rpl7, Rps7, Cars2, Exosc1, Qrsl1, Utp6, Ints8, Rps19, Iars, Mars, Srrt, Rpl5, Rps6, Ints6, Rps28, Ebna1bp2, Rpsa, Mphosph10, Nsun2, Wdr4, Nop10, Rps21, Trmt12, Ints1, Rrp36, Eri1, Rps16, Rrp1, Nars, Fbl, Rpl11, Dus2l, Dars, Nol8, Rps8, Utp20, Wbp11, 1110008L16Rik, Farsb, D10Wsu52e, Nop14, Tdrd1, Rpf1, Pdcd11, Zcchc11, Sars, Pa2g4, Sbds, I…
GO:0008285	negative regulation of ce	0.02866 ( 96 of 3350 genes )	0.01350 ( 459 of 34011 annotated genes )	1.435e-13	6.715e-10	Gabbr1, Wisp2, Rara, Frzb, Brd7, Cav2, Cherp, Bcl11b, Krit1, Id2, Dis3l2, Spn, E2f7, Ptpn6, Tesc, Ctnna1, Bmp5, Hsf1, Ambra1, Kat2b, Lrp6, Tspo, Trp53, Morc3, Apc, Csk, Wdr77, Pik3r1, Stat1, Tgfbr2, Rnf41, Ctla4, Bcl2, Smad4, Kiss1r, Hdac1, Dlg1, Lrrk2, Rbpj, Il10, Lif, Il20rb, Aimp2, Ppp2r5c, Inpp5d, Raf1, Foxp3, Zeb1, Cdc73, Fgfr2, Ndfip1, Ilk, Pbrm1, Pds5b, Stk4, Ing4, Pten, Atp2b1, Hdac4, Igf…
GO:0031401	positive regulation of pr	0.02388 ( 80 of 3350 genes )	0.01041 ( 354 of 34011 annotated genes )	2.227e-13	1.043e-09	Hspa5, Lats1, Brd7, Smad7, Psen1, Adam17, Gnb2l1, Csnk1d, Rgma, Gba, Hcls1, Bmp5, Sqstm1, Pecam1, Atg7, Trp53, Il6st, Psmd10, Fanci, Akt2, Pik3r1, Stub1, Nipbl, Bcl2, Araf, Smad4, Arnt, Lrrk2, Rad50, Paxip1, Tnk2, Itgb3, Ccl5, Lif, Fnta, Aimp2, Rap2c, Dnmt3b, Trib2, Tmem188, Rnf111, Raf1, Foxp3, Gsk3b, Gnas, Arfgef1, Ccnd2, Ndfip1, Arrb2, Prkcd, Cd81, Hdac4, Pten, Tgfb1, Cd3e, Clcf1, Pak2, Brca1,…
GO:0050767	regulation of neurogenesi	0.02746 ( 92 of 3350 genes )	0.01279 ( 435 of 34011 annotated genes )	2.335e-13	1.093e-09	Rara, Psen1, Ywhah, Anapc2, Bcl11b, Spg20, Id2, 2400003C14Rik, Sez6, Hmg20b, Snw1, Ctnna1, Rapgef4, Lgals1, Spag9, Dab1, Ppp2r5d, Sipa1l1, Ncs1, Rgs14, Tspo, Trp53, Ptk7, Il6st, Dpysl2, Zhx2, Prkch, Calr, Rtn4, Klk6, Bcl2, Hdac1, Lrrk2, Ccl5, Ntrk3, Lif, Fxn, Neurod1, Sema3a, Barhl2, Dnmt3b, Fig4, Rufy3, Rela, Ssh1, Zeb1, Gsk3b, Ssh2, Nrcam, Vim, Arhgap4, Ilk, Ngef, Ptpra, Tnik, Cntn1, Prex1, Num…
GO:0000902	cell morphogenesis	0.03731 ( 125 of 3350 genes )	0.01973 ( 671 of 34011 annotated genes )	2.442e-13	1.143e-09	Tyro3, Col4a3bp, Cfl1, Psmb10, Mycbp2, Csnk1a1, Myo9b, 1700019E19Rik, Actb, Psen1, Dlg4, Asap1, Ywhah, Bcl11b, Anapc2, B3gnt2, Spg20, 2400003C14Rik, Als2cr4, Zranb1, Atg7, Bves, Nfatc1, Dab1, Sipa1l1, Nfasc, Gpm6a, Rock1, Lrp6, Flna, Apc, Ift140, Stxbp1, Rtn4rl1, Rtn4, Lrrc50, Dync2h1, Bcl2, Smad4, Hnrnpab, Evl, Picalm, Lrrk2, Larp4, Mtap7, Rbpj, Wdr19, Trim28, Rab8a, Itgb3, Cul3, Ntrk3, Lif, Fxn…
GO:0010627	regulation of intracellul	0.03104 ( 104 of 3350 genes )	0.01529 ( 520 of 34011 annotated genes )	2.785e-13	1.303e-09	Zc3hav1, Prkcb, Nfkbid, Slc20a1, Ccr7, Ptpn6, Prkd2, Hcls1, Ikbkb, Sqstm1, Pecam1, S100a13, Lgals1, Spag9, Dab1, Rgs14, Flna, Il6st, Akr1b3, Psap, Psmd10, Pja2, Apc, Itsn1, Csk, Akt2, Rnf31, Hmgcr, Gpx1, Zmynd11, Stat1, Slc44a2, Rnf41, Lgals9, Bst2, Zfp622, Cd27, Zfp110, Eef1d, Mier1, Itgb3, Ccl5, Map4k2, Lif, Agap2, Neurod1, Ptprc, Map2k7, Cdc42se1, Hbegf, Rela, Irf3, Map4k4, Igf1r, Igbp1, Chuk,…
GO:0051101	regulation of DNA binding	0.02299 ( 77 of 3350 genes )	0.00988 ( 336 of 34011 annotated genes )	2.915e-13	1.364e-09	Rhebl1, Prkcb, Smad7, Nfkbid, Id2, Tax1bp1, Egln1, Prkd2, Ddit3, Runx1t1, Ikbkb, Crtc3, Lrp6, Flna, Pitx2, Usp7, Psmd10, Rps3, Hjurp, Prkch, Foxn3, Rnf31, Pim1, Nlrc5, Crebzf, Foxp2, Nlrc3, Brd4, Pycard, Calm1, Il10, Hspa4, Neurod1, Hmgn3, Trib2, Itgb2, Tlr2, Rela, Foxp3, Foxp1, Irak2, Crebbp, Foxo1, Prdx3, Hipk1, Rsf1, Mtpn, Arrb2, Hdac4, Pten, Tgfb1, Foxk1, Sigirr, Npm1, Trim21, Foxj3, Vegfa, S…
GO:0042692	muscle cell differentiati	0.01940 ( 65 of 3350 genes )	0.00764 ( 260 of 34011 annotated genes )	3.121e-13	1.461e-09	Rara, Cav2, Ttn, Atg7, Lgals1, Epc1, Spag9, Cacna2d2, Mbnl3, Pitx2, Ankrd17, Nfatc3, Ppp3ca, Pik3r1, Mbnl1, Gpx1, Mkl1, Bcl2, Lrrk2, Bin1, Tpm1, Zeb1, Gsk3b, Chuk, Foxp1, Fgfr2, Ilk, Pbrm1, H3f3a, Tshz3, Bnip2, Hdac4, Igfbp3, Ybx1, Casp1, Tgfb1, Setd3, Capn2, Actg1, Myog, Notch1, Neo1, Eif5a, Vegfa, Foxo4, Myh10, Homer1, Syne1, Ep300, Ptbp1, Utrn, Afg3l2, Myh9, Kdm1a, Ezh2, Col4a1, Lef1, Med28, D…
GO:0051248	negative regulation of pr	0.01940 ( 65 of 3350 genes )	0.00764 ( 260 of 34011 annotated genes )	3.121e-13	1.461e-09	Kdm3a, Ubxn1, Rara, Smad7, Psen1, Ndufa13, Gnb2l1, Ube2b, Ptpn6, Hmg20b, Tnrc6a, Patl1, Eif4ebp1, Dnajc10, Lrp6, Flna, Pik3r1, Cpeb3, Calr, Smad4, Banp, Paip2, Bcor, Itgb3, Il10, Agap2, Hspa4, Ptprc, Ctla2a, Mgea5, Dnmt3b, Mad2l1, Samsn1, Rela, Foxp3, Igbp1, Eif2c1, Mdm4, Arrb2, Ireb2, Prkcd, Pten, Igfbp3, Bat3, Tgfb1, Usp4, Trim21, Bax, Cr1l, Brca1, Sema4d, Fmr1, Wac, Caprin1, Fyn, Fkbp1a, Ywhae…
GO:0022603	regulation of anatomical	0.02955 ( 99 of 3350 genes )	0.01432 ( 487 of 34011 annotated genes )	3.718e-13	1.74e-09	Cfl1, Bai2, Prkcb, Ets1, Psen1, Ywhah, Anapc2, Spg20, Krit1, 2400003C14Rik, Egln1, Zranb1, Prkd2, Dab1, Sipa1l1, Plcg1, Pde3b, Rock1, Lrp6, Ptk7, Apc, Frs2, Stat1, Rtn4, Foxp2, Bcl2, Smad4, Lrrk2, Larp4, Runx1, Erap1, Rbpj, Bcor, Ddah1, Ccl5, Ntrk3, Lif, Fxn, Sema3a, Barhl2, Rufy3, Itgb2, Ssh1, Gsk3b, Ssh2, Foxp1, Vim, Arhgap4, Fgfr2, Ilk, Ngef, Tnik, Numb, Pten, Ccl11, Trpv2, Tgfb1, Sox17, Smad2…
GO:0002253	activation of immune resp	0.01552 ( 52 of 3350 genes )	0.00541 ( 184 of 34011 annotated genes )	4.394e-13	2.057e-09	Tyro3, Tlr2, Rela, Phpt1, Skap1, Cd247, Prkcb, Foxp3, Mapkapk2, Psen1, Ccr7, C1qb, Ptpn22, C4bp, Ptpn6, Cd86, Mill2, Arrb2, C8a, Klhl6, Prkd2, Sh2b2, Cd3e, Pdpk1, Plcg1, Cr1l, Clec2i, Itk, Lax1, Csk, Nfatc2, C3, Masp2, Plekha1, Prkch, Fyn, Cblb, Ubash3a, Rnf31, Ctla4, Bcl2, Tmem173, Pycard, Hspd1, Lck, Zap70, Trim30a, Malt1, Ptprc, Nckap1l, Kcnn4, Tbk1,
GO:0018393	internal peptidyl-lysine	0.01134 ( 38 of 3350 genes )	0.00320 ( 109 of 34011 annotated genes )	4.93e-13	2.308e-09	Usp22, Ldb1, Kat2a, Foxp3, Ctcf, Brd8, Brd7, Brd1, Ep400, Crebbp, Csrp2bp, Ing4, Tgfb1, Ruvbl2, Bat3, Morf4l1, Nat15, Epc1, Kat2b, Myst3, Brca1, Tada3, Ep300, Hcfc1, Brd4, Lef1, Taf1, Paxip1, Brpf3, Yeats4, Mll1, Ncoa3, Ogt, Mgea5, Myst4, Ncoa1, Por, Ing3,
GO:0043086	negative regulation of ca	0.03313 ( 111 of 3350 genes )	0.01691 ( 575 of 34011 annotated genes )	5.033e-13	2.356e-09	Hspa5, Gabbr1, Phpt1, Lmtk3, Sfi1, Lats1, Smad7, Psen1, Birc6, Gnb2l1, Oas1d, Usp47, Rrp1b, Ptpn6, Gpi1, Tesc, Cep192, Gba, Dusp19, Anp32e, Sbf1, Trim27, Gnai3, Ptma, Oxa1l, Col28a1, Kat2b, Hbxip, Rgs14, Lrp6, Flna, Nfkb1, Dnajc3, Apc, Lax1, Csk, Akt2, Hmgcr, Gpx1, Prol1, Oprd1, Mphosph10, Ubn1, Cd27, Dusp7, Lrrk2, Cand1, Rag1, Oaz1, Serpina6, Dlg2, Ptprc, Gnai2, Rps6ka1, Nckap1l, Calu, Reck, Stf…
GO:0040008	regulation of growth	0.03045 ( 102 of 3350 genes )	0.01502 ( 511 of 34011 annotated genes )	5.34e-13	2.5e-09	Stat5b, Ino80, Wisp2, Prkcb, Frzb, Adam17, Anapc2, Spg20, Ndufa13, Gnb2l1, Eno1, 2400003C14Rik, Usp47, Sbf1, Chd7, Hsf1, Epc1, Ppt1, Cacna2d2, Trp53, Rbbp7, Celf1, Psmd10, Nipbl, Brms1l, Tgfbr2, Rtn4, Bcl2, Idh3g, Gng4, Smad4, Ikzf1, Dlg1, Ppp1r9b, Rbpj, Il10, Agpat6, Ntrk3, Fxn, Adipor2, Cyba, Sema3a, Barhl2, Hbegf, Derl2, Tlr2, Tspyl2, Creb1, Wrn, Brd8, Foxp1, Arhgap4, Fgfr2, Ilk, Mtpn, Stk4, S…
GO:0009605	response to external stim	0.04537 ( 152 of 3350 genes )	0.02599 ( 884 of 34011 annotated genes )	5.706e-13	2.671e-09	Usf2, Uaca, Stat5b, Mycbp2, Myo9b, Trpm4, Rara, Ccl21a, Bcl11b, Elmo2, Ccr7, Atg13, Adora3, Snw1, Ano6, Tnrc6a, Fos, Atg7, Stk39, Trp53, Sell, Akt2, Pde2a, Calcrl, Lsp1, Hmgcr, Stat1, Rtn4, Bcl2, Park7, Evl, Mtap7, Npy5r, Psmb4, Il10, Ccl5, Ntrk3, Itga6, Il20rb, Sema3a, Larp1, Itgb2, Tlr2, Rela, Vasp, Foxp1, Nrcam, Sod1, Prkcd, Arrb2, Pten, Ccl11, Tgfb1, Ndel1, Clcf1, Rpl24, Il16, Trim24, Add1, C…
GO:0043484	regulation of RNA splicin	0.00806 ( 27 of 3350 genes )	0.00173 ( 59 of 34011 annotated genes )	5.923e-13	2.773e-09	U2af2, Srsf7, Hnrnph1, Hnrnpf, Akt2, Ptbp2, Rps13, Mbnl1, Clk1, Ptbp1, D11Bwg0517e, Son, Ddx5, Clk4, Rbm22, Srsf9, Sfswap, Rbmy1a1, Srsf10, Npm1, Hnrnpa2b1, Rbm25, Snrnp70, Rbm5, Mbnl3, Rps26, Celf1,
GO:0006473	protein acetylation	0.01224 ( 41 of 3350 genes )	0.00368 ( 125 of 34011 annotated genes )	6.148e-13	2.878e-09	Usp22, Ldb1, Kat2a, Foxp3, Ctcf, Brd8, Brd7, Brd1, Ep400, Crebbp, Csrp2bp, Asl, Ing4, Tgfb1, Ruvbl2, Bat3, Morf4l1, Nat15, Epc1, Kat2b, Myst3, Brca1, Mdh2, Tada3, Ep300, Hcfc1, Brd4, Lef1, Taf1, Paxip1, Brpf3, Naa15, Yeats4, Ogt, Mll1, Ncoa3, Mgea5, Myst4, Ncoa1, Por, Ing3,
GO:0046777	protein autophosphorylati	0.01522 ( 51 of 3350 genes )	0.00532 ( 181 of 34011 annotated genes )	8.331e-13	3.9e-09	Tyro3, Chek2, Uhmk1, Igf1r, Csnk1g3, Clk1, Fgfr2, Vrk1, Tnik, Stk4, Prkcd, Prkd2, Ppp2ca, Jak1, Stk16, Trim24, Ppp2r5d, Csnk1g1, Pak2, Stk17b, Bcr, Vegfa, Csk, Csnk1g2, Fyn, Pim1, Camk2d, Wnk1, Ripk1, Hk1, Trpm7, Mark2, Stk10, Clk4, Lrrk2, Smg1, Ddr2, Rad50, Taf1, Sik1, Trim28, Csnk2a1, Lck, Zap70, Nme2, Ntrk3, Ptprc, Nlk, Stk24, Rap2c, Mapk14,
GO:0043161	proteasomal ubiquitin-dep	0.01313 ( 44 of 3350 genes )	0.00418 ( 142 of 34011 annotated genes )	8.401e-13	3.933e-09	Trib2, Erlec1, Edem3, Ubxn1, Ube2d3, Rnf103, Smad7, Psen1, Znrf1, Pcbp2, Gnb2l1, Cdc34, Csnk1d, Ube2b, Kctd13, Arrb2, Pten, Hsp90b1, Bat3, Dnajc10, Os9, Fbxl3, Psmd10, Psmc5, Amfr, Wac, Stub1, Cul1, Trib1, Tbl1x, Fbxo45, Lrrk2, Taf1, Cul3, Cd2ap, Crbn, Usp19, Rnf4, Derl2, Ppp2cb, Klhl20, Mad2l1, Ppp2r5c, Rad23b,
GO:0000226	microtubule cytoskeleton	0.01881 ( 63 of 3350 genes )	0.00744 ( 253 of 34011 annotated genes )	8.677e-13	4.062e-09	Kif20a, Ino80, Chek2, Terf1, Tubgcp3, Cep250, Tuba8, Ranbp10, Kif2a, Nuf2, Atxn7, Tubgcp5, Ift46, Cltc, Csnk1d, Ap1g1, Hsph1, Bub3, Xpo1, Ube2b, Son, Ppp1r12a, Cep68, Cep192, Ndel1, Senp6, 6720463M24Rik, Pafah1b1, Npm1, Rgs14, Flna, Tubgcp4, Brca1, Sgol1, Cetn2, Apc, Cdkn1b, Haus4, Ckap5, Nedd1, Nin, Mapre1, Nefh, Tbcd, Myh9, Gpsm2, Sbds, Ralbp1, Clip1, Rcc1, Chd3, Mtap7, Dicer1, Ncor1, Fkbp4, Ce…
GO:0002252	immune effector process	0.02388 ( 80 of 3350 genes )	0.01067 ( 363 of 34011 annotated genes )	9.006e-13	4.216e-09	Stat5b, Zc3hav1, Pram1, Trpm4, Rara, Psen1, Ddx60, Ccr7, Adora3, Spn, Ptpn6, C8a, Mll5, Lgals8, Lat, Lgals1, H2-T23, Stat6, Il12rb1, Trp53, Rnf168, Cplx2, H2-D1, Masp2, Cd47, H2-K1, Tap1, Rps6, Bst2, Bcl2, Tmem173, Pycard, Dlg1, Pvr, Ifnar1, Lcp1, Paxip1, Itgal, Il10, Ccl5, Ptprc, Il20rb, Ifnb1, Cd37, Inpp5d, Pi4k2a, Tlr2, Irf3, Foxp3, Foxp1, Pcbp2, Abr, C1qb, Ndfip1, C4bp, Cd86, Arrb2, Mill2, Pr…
GO:0022604	regulation of cell morpho	0.01582 ( 53 of 3350 genes )	0.00567 ( 193 of 34011 annotated genes )	9.174e-13	4.295e-09	Cfl1, Ssh1, Gsk3b, Ssh2, Psen1, Ywhah, Vim, Anapc2, Arhgap4, Spg20, Ngef, Ilk, 2400003C14Rik, Tnik, Zranb1, Numb, Pten, Trpv2, Tgfb1, Smad2, Ndel1, Capzb, Ppp2ca, Pafah1b1, Actr3, Dab1, Sipa1l1, Notch1, Cdh4, Sema4d, Syne1, Caprin1, Cacna1a, Ep300, Ttc3, Rtn4, Zmym3, Smad4, Mark2, Mif, Larp4, Lrrk2, Lef1, Lrrc4c, Islr2, Fxn, Lif, Ntrk3, Phip, Sema3a, Barhl2, Stk24, Rufy3,
GO:0018394	peptidyl-lysine acetylati	0.01134 ( 38 of 3350 genes )	0.00326 ( 111 of 34011 annotated genes )	9.448e-13	4.423e-09	Usp22, Ldb1, Kat2a, Foxp3, Ctcf, Brd8, Brd7, Brd1, Ep400, Crebbp, Csrp2bp, Ing4, Tgfb1, Ruvbl2, Bat3, Morf4l1, Nat15, Epc1, Kat2b, Myst3, Brca1, Tada3, Ep300, Hcfc1, Brd4, Lef1, Taf1, Paxip1, Brpf3, Yeats4, Mll1, Ncoa3, Ogt, Mgea5, Myst4, Ncoa1, Por, Ing3,
GO:0002764	immune response-regulatin	0.01313 ( 44 of 3350 genes )	0.00420 ( 143 of 34011 annotated genes )	1.102e-12	5.158e-09	Tyro3, Tlr2, Rela, Phpt1, Skap1, Cd247, Prkcb, Foxp3, Mapkapk2, Psen1, Ccr7, Ptpn22, Ptpn6, Cd86, Mill2, Arrb2, Klhl6, Prkd2, Sh2b2, Cd3e, Pdpk1, Plcg1, Clec2i, Itk, Lax1, Csk, Nfatc2, Plekha1, Fyn, Prkch, Cblb, Ubash3a, Rnf31, Ctla4, Bcl2, Hspd1, Lck, Zap70, Trim30a, Malt1, Ptprc, Il20rb, Nckap1l, Kcnn4,
GO:0043543	protein acylation	0.01313 ( 44 of 3350 genes )	0.00420 ( 143 of 34011 annotated genes )	1.102e-12	5.158e-09	Usp22, Ldb1, Kat2a, Foxp3, Ctcf, Brd8, Brd7, Brd1, Ep400, Crebbp, Csrp2bp, Asl, Ing4, Tgfb1, Ruvbl2, Bat3, Morf4l1, Nat15, Epc1, Zdhhc17, Kat2b, Myst3, Brca1, Mdh2, Tada3, Ep300, Hcfc1, Brd4, Lef1, Taf1, Paxip1, Cd4, Brpf3, Naa15, Yeats4, Ogt, Oas2, Ncoa3, Mll1, Mgea5, Myst4, Ncoa1, Por, Ing3,
GO:0010498	proteasomal protein catab	0.01373 ( 46 of 3350 genes )	0.00453 ( 154 of 34011 annotated genes )	1.115e-12	5.218e-09	Trib2, Erlec1, Edem3, Ubxn1, Ube2d3, Rnf103, Smad7, Psen1, Znrf1, Pcbp2, Gnb2l1, Cdc34, Csnk1d, Ube2b, Kctd13, Arrb2, Pten, Hsp90b1, Bat3, Psme3, Dnajc10, Os9, Fbxl3, Psmd10, Psmc5, Amfr, Wac, Stub1, Cul1, Gpx1, Trib1, Tbl1x, Fbxo45, Lrrk2, Taf1, Cul3, Cd2ap, Crbn, Usp19, Rnf4, Derl2, Ppp2cb, Klhl20, Mad2l1, Ppp2r5c, Rad23b,
GO:0051325	interphase	0.01582 ( 53 of 3350 genes )	0.00570 ( 194 of 34011 annotated genes )	1.146e-12	5.365e-09	Rfwd3, Ino80, Chek2, Arpp19, Mta3, Lrwd1, Lats1, Brd7, Cdc73, Adam17, Ccnd2, Crebbp, Id2, Usp47, Anp32b, Ptpn6, Pten, Usp37, Tgfb1, Cdc23, Rpl24, Nfatc1, Eif4ebp1, Trp53, Foxo4, Cdkn1b, Ppp3ca, Gpr132, Rps6, Pim1, Crlf3, Ptprv, Camk2d, Sin3a, Brd4, Bcl2, Ppm1d, Ezh2, Rcc1, Gas1, Cdc123, Taf1, Apbb2, Phf8, Casp2, Ilkap, Ptprc, C77370, Paf1, Gigyf2, Rhou, Cdk4, Ppp2r5c,
GO:0002757	immune response-activatin	0.01284 ( 43 of 3350 genes )	0.00406 ( 138 of 34011 annotated genes )	1.23e-12	5.757e-09	Tyro3, Tlr2, Rela, Phpt1, Skap1, Cd247, Prkcb, Foxp3, Mapkapk2, Psen1, Ccr7, Ptpn22, Ptpn6, Cd86, Mill2, Arrb2, Klhl6, Prkd2, Sh2b2, Cd3e, Pdpk1, Plcg1, Clec2i, Itk, Lax1, Csk, Nfatc2, Plekha1, Fyn, Prkch, Cblb, Ubash3a, Rnf31, Ctla4, Bcl2, Hspd1, Lck, Zap70, Trim30a, Malt1, Ptprc, Nckap1l, Kcnn4,
GO:0007163	establishment or maintena	0.01045 ( 35 of 3350 genes )	0.00285 ( 97 of 34011 annotated genes )	1.278e-12	5.984e-09	Cfl1, Myo9b, Llgl1, Igf1r, Gsk3b, Ezr, Arfgef1, Macf1, Ccr7, Krit1, Ilk, Ctnna1, Actr2, Pafah1b1, Actr3, Amotl1, Ptk7, Apc, Exoc4, Cd3g, Ckap5, Cyth1, Gpsm2, Myh9, Scrib, Lims1, Dock2, Mark2, Lama1, Frmd4b, Frmd4a, Nckap1l, Rap1b, Nckap1, Numa1,
GO:0016072	rRNA metabolic process	0.01104 ( 37 of 3350 genes )	0.00315 ( 107 of 34011 annotated genes )	1.321e-12	6.186e-09	Rrp36, Rps24, Eri1, Dis3, Rps16, Ddx56, Nob1, Rrp1, Rrp1b, Fbl, Nhp2, Rpl7, Rps7, Rpl11, Exosc1, Nol8, Rps8, Utp20, Wbp11, Utp6, Rps19, Nop14, Rpf1, Pdcd11, Rpl5, Rps6, Pa2g4, Rps28, Ebna1bp2, Mphosph10, Rpsa, Sbds, Nop10, Rps21, Xrn1, Emg1, Rps17,
GO:0006091	generation of precursor m	0.02060 ( 69 of 3350 genes )	0.00864 ( 294 of 34011 annotated genes )	1.504e-12	7.041e-09	Suclg1, Pcdh12, Prkaa1, Ndufs1, Ndufc2, Mat2a, Ndufa9, Etfa, Ndufa13, Cyc1, Txnl1, Ldha, Gpi1, Dlst, Aco1, Ndufa10, Uqcr11, Oxa1l, Uqcrc2, Il6st, Nfatc3, Mdh2, Akt2, Uqcrc1, Ndufs2, Ppp1cb, Idh3g, Dld, Ogdh, Ppp1ca, Ppp1r3b, Fxn, Cyba, Fastkd3, Pgam1, Cs, Idh3b, Cmah, Gsk3b, Gnas, Cyb5b, Entpd5, Ndufa2, Etfb, Txnrd3, Hdac4, Aldoa, Pfkp, Bax, Cr1l, Ppp1cc, Fdx1, Pdha2, Sdhc, Sdha, Fads2, Cox10, Ac…
GO:0051094	positive regulation of de	0.03701 ( 124 of 3350 genes )	0.02002 ( 681 of 34011 annotated genes )	1.564e-12	7.32e-09	Stat5b, Hspa5, Prkcb, Rara, Frzb, Ets1, Anapc2, Ccr7, Id2, Hsp90aa1, 2400003C14Rik, Tesc, Hmg20b, Snw1, Rcor1, Prkd2, Mll5, Epc1, Spag9, Dab1, Plcg1, Rgs14, Tspo, Trp53, Il6st, Il2rg, Adamts20, Apc, Nr2c2, Pik3r1, Adamts9, Prkch, Hmgcr, Frs2, Tgfbr2, Rtn4, Bcl2, Smad4, Hdac1, Fbn2, Ikzf1, Cd27, Dlg1, Runx1, Erap1, Rbpj, Asxl2, Ddah1, Itgb3, Ccl5, Ntrk3, Lif, Fxn, Neurod1, Ptprc, Nckap1l, Dnmt3b, …
GO:0006897	endocytosis	0.02299 ( 77 of 3350 genes )	0.01020 ( 347 of 34011 annotated genes )	1.661e-12	7.777e-09	Tyro3, Wasl, Rara, Dlg4, Cav2, Snapin, Elmo2, Ccr7, Gnb2l1, Atp5b, Ube3a, Pecam1, Atad1, Gtf2h2, Elmo1, Ppt1, Adrbk1, Gria1, Lrp6, Vav1, Sgip1, Itsn1, Csk, Ap2b1, Cd47, Stxbp1, Calcrl, Calr, Tgfbr2, Scrib, Rab22a, Picalm, Bin1, Tnk2, Coro1a, Cd2ap, Cdc42se1, Nckap1l, Abca7, Usp20, Wasf2, Lrp2, Fnbp1, Coro1c, Abr, Cltc, Ap1g1, Scyl2, Npc1, Rin2, Arrb2, Pten, Tgfb1, Scarb1, Clec4f, Sh3kbp1, Add1, B…
GO:0010324	membrane invagination	0.02299 ( 77 of 3350 genes )	0.01020 ( 347 of 34011 annotated genes )	1.661e-12	7.777e-09	Tyro3, Wasl, Rara, Dlg4, Cav2, Snapin, Elmo2, Ccr7, Gnb2l1, Atp5b, Ube3a, Pecam1, Atad1, Gtf2h2, Elmo1, Ppt1, Adrbk1, Gria1, Lrp6, Vav1, Sgip1, Itsn1, Csk, Ap2b1, Cd47, Stxbp1, Calcrl, Calr, Tgfbr2, Scrib, Rab22a, Picalm, Bin1, Tnk2, Coro1a, Cd2ap, Cdc42se1, Nckap1l, Abca7, Usp20, Wasf2, Lrp2, Fnbp1, Coro1c, Abr, Cltc, Ap1g1, Scyl2, Npc1, Rin2, Arrb2, Pten, Tgfb1, Scarb1, Clec4f, Sh3kbp1, Add1, B…
GO:0034968	histone lysine methylatio	0.00776 ( 26 of 3350 genes )	0.00168 ( 57 of 34011 annotated genes )	1.742e-12	8.156e-09	Setd1a, Kdm3a, Ehmt1, Ash2l, Wbp7, Rbbp5, Dnmt1, Ezh2, Kdm1a, Setd7, Setd2, Jarid2, Suv420h1, Ezh1, Mll5, Paxip1, Whsc1l1, Setd8, Setd3, Bcor, Mll1, Ogt, Mll2, Dnmt3b, Brca1, Mll3,
GO:0051338	regulation of transferase	0.03104 ( 104 of 3350 genes )	0.01573 ( 535 of 34011 annotated genes )	1.748e-12	8.181e-09	Hspa5, Lats1, Psen1, Adam17, Ccr7, Gnb2l1, Oas1d, Ptpn6, Map3k5, Vapb, Gba, Dusp19, Ttn, Trim27, Spag9, Dab1, Ccnk, Kat2b, Rgs14, Lrp6, Hsp90ab1, Psmd10, Dnajc3, Apc, Lax1, Csk, Pik3r1, Pim1, Hmgcr, Prkar1a, Nlrc5, Frs2, Abi1, Tgfbr2, Map4k1, Araf, Kiss1r, Zfp622, Dusp7, Dlg1, Lrrk2, Robld3, Rad50, Itgb3, Ccl5, Map4k2, Agap2, Dgka, Fxn, Ptprc, Map2k7, Gnai2, Nckap1l, Rap2c, Terf1, Raf1, Pik3ip1, …
GO:0006364	rRNA processing	0.01075 ( 36 of 3350 genes )	0.00303 ( 103 of 34011 annotated genes )	1.838e-12	8.601e-09	Rrp36, Rps24, Eri1, Dis3, Rps16, Ddx56, Nob1, Rrp1, Rrp1b, Fbl, Nhp2, Rpl7, Rps7, Rpl11, Exosc1, Nol8, Rps8, Utp20, Wbp11, Utp6, Rps19, Nop14, Rpf1, Pdcd11, Rpl5, Rps6, Pa2g4, Rps28, Ebna1bp2, Mphosph10, Rpsa, Sbds, Nop10, Rps21, Emg1, Rps17,
GO:0016571	histone methylation	0.00866 ( 29 of 3350 genes )	0.00206 ( 70 of 34011 annotated genes )	1.868e-12	8.745e-09	Setd1a, Kdm3a, Satb1, Ctcf, Ehmt1, Ash2l, Wbp7, Rbbp5, Dnmt1, Ezh2, Kdm1a, Setd7, Setd2, Jarid2, Suv420h1, Mll5, Ezh1, Paxip1, Whsc1l1, Setd8, Setd3, Bcor, Ogt, Eed, Mll1, Mll2, Dnmt3b, Brca1, Mll3,
GO:0048878	chemical homeostasis	0.04209 ( 141 of 3350 genes )	0.02387 ( 812 of 34011 annotated genes )	1.889e-12	8.841e-09	Usf2, Mylip, Rims4, Trpm4, Prkcb, Plcd1, Rara, Atp2a1, Smad7, Atox1, Slc30a2, Atp2a2, Sez6, Fis1, Aco1, Pde3b, Npc2, Tspo, Trp53, Akt2, Gna13, Bcap31, Tap1, Hmgcr, Bcl2, Park7, Dhrs7c, Itpr1, Itgb3, Ccl5, Fxn, Hmgn3, Ptprc, Kcnq2, Abcc2, Sypl2, Chrnd, Ncor2, Nab1, Gnas, Prdx3, Adam22, Clic1, Ilk, Ryr3, Sod1, Pten, Apob, Tgfb1, Slc9a8, Cacna1c, Trim24, Bax, Kcnc2, Vegfa, Trpc2, Hexa, Atp2c1, Eif2b…
GO:0050778	positive regulation of im	0.01910 ( 64 of 3350 genes )	0.00776 ( 264 of 34011 annotated genes )	2.082e-12	9.748e-09	Tyro3, Stat5b, Phpt1, Cd247, Prkcb, Mapkapk2, Psen1, Ccr7, Ptpn6, C8a, Prkd2, Plcg1, H2-T23, Il12rb1, Clec2i, Itk, H2-D1, Lax1, Csk, Masp2, Prkch, H2-K1, Tap1, Ubash3a, Rnf31, Ctla4, Bcl2, Tmem173, Pycard, Pvr, Trim30a, Ptprc, Nckap1l, Tbk1, Rela, Tlr2, Skap1, Foxp3, C1qb, Ptpn22, C4bp, Cd86, Arrb2, Mill2, Klhl6, Cd3e, Sh2b2, Clcf1, Pdpk1, Polr3f, Cr1l, Nfatc2, C3, B2m, Plekha1, Fyn, Cblb, Mif, P…
GO:0051329	interphase of mitotic cel	0.01522 ( 51 of 3350 genes )	0.00544 ( 185 of 34011 annotated genes )	2.083e-12	9.749e-09	Rfwd3, Ino80, Chek2, Arpp19, Mta3, Lrwd1, Lats1, Brd7, Cdc73, Adam17, Ccnd2, Id2, Usp47, Anp32b, Ptpn6, Pten, Usp37, Tgfb1, Cdc23, Rpl24, Nfatc1, Eif4ebp1, Trp53, Foxo4, Cdkn1b, Ppp3ca, Gpr132, Rps6, Pim1, Crlf3, Ptprv, Camk2d, Sin3a, Brd4, Bcl2, Ppm1d, Ezh2, Rcc1, Gas1, Cdc123, Taf1, Apbb2, Phf8, Casp2, Ilkap, C77370, Paf1, Gigyf2, Rhou, Cdk4, Ppp2r5c,
GO:0006479	protein methylation	0.01015 ( 34 of 3350 genes )	0.00276 ( 94 of 34011 annotated genes )	2.461e-12	1.152e-08	Setd1a, Kdm3a, Satb1, Ctcf, Ehmt1, Ash2l, Wbp7, Etf1, Prmt5, Setd7, Setd2, Suv420h1, Mll5, Ezh1, Whsc1l1, Setd3, Prmt3, Brca1, Ilf3, Rbbp5, Dnmt1, Fbxo11, Kdm1a, Ezh2, Jarid2, Paxip1, Bcor, Setd8, Mll1, Eed, Ogt, Mll2, Dnmt3b, Mll3,
GO:0008213	protein alkylation	0.01015 ( 34 of 3350 genes )	0.00276 ( 94 of 34011 annotated genes )	2.461e-12	1.152e-08	Setd1a, Kdm3a, Satb1, Ctcf, Ehmt1, Ash2l, Wbp7, Etf1, Prmt5, Setd7, Setd2, Suv420h1, Mll5, Ezh1, Whsc1l1, Setd3, Prmt3, Brca1, Ilf3, Rbbp5, Dnmt1, Fbxo11, Kdm1a, Ezh2, Jarid2, Paxip1, Bcor, Setd8, Mll1, Eed, Ogt, Mll2, Dnmt3b, Mll3,
GO:0032259	methylation	0.01701 ( 57 of 3350 genes )	0.00653 ( 222 of 34011 annotated genes )	2.715e-12	1.271e-08	Setd1a, Kdm3a, Satb1, Fam119a, Ctcf, Gsk3b, Ehmt1, Mettl3, Gnas, Ash2l, Wbp7, Dnmt3a, Fbl, Etf1, Prmt5, Setd7, Setd2, Suv420h1, Mll5, Ezh1, Atf7ip, Whsc1l1, Setd3, Prmt3, Mett10d, Mta2, Pcmtd1, Hells, Brca1, Dph5, Tdrd1, Wbscr22, 6430573F11Rik, Rbbp5, Ilf3, Ash1l, Dnmt1, Comt1, Fbxo11, Ezh2, Kdm1a, Nsun2, Jarid2, Paxip1, Setd8, Bcor, Trmt61a, Rnmt, Ogt, Eed, Ftsjd2, Mll1, Emg1, Mll2, Dnmt3b, Mll3…
GO:0006457	protein folding	0.01313 ( 44 of 3350 genes )	0.00432 ( 147 of 34011 annotated genes )	3.165e-12	1.481e-08	Ppil2, Clgn, Entpd5, Pfdn2, Dnajc4, Hspa8, Hsp90aa1, Hsph1, Hspe1, Cct5, Hsp90b1, Dnajc9, Dnajc16, Cct2, Dnajc10, Hspa9, Hsp90ab1, Sh3glb1, Ranbp2, Dnajc3, Ppib, B2m, Dnajc11, Stub1, Sec63, Dnajc5, Fkbp1a, Hscb, Calr, Tcp1, Tbcd, Cct8, Dnajc8, Ppig, Dnajc1, H2-Ke2, Fkbp4, Hspd1, Vbp1, Ppil4, Cct6a, Ero1l, Canx, Dnajc7,
GO:0006260	DNA replication	0.01731 ( 58 of 3350 genes )	0.00676 ( 230 of 34011 annotated genes )	3.924e-12	1.837e-08	Ino80, Terf1, Tspyl2, Igf1r, Wrn, Recql, Lrwd1, Smc3, Rfc4, Smc1a, Poli, Orc4, Tk2, Top1, Mcm6, Orc3, Orc5, Nasp, Kctd13, Ing4, Papd5, Ssrp1, Tgfb1, Bmp5, Npm1, Polb, Pds5a, Nol8, Polg, Med1, Trp53, Rnaseh1, Rev3l, Brca1, Rbbp7, Gins1, Helb, Lig1, Pola2, Calr, Sin3a, Lig4, Cst3, Stag2, Tbrg1, Chtf18, Apitd1, Tinf2, Rad50, Supt16h, Orc1, Csf2, Mcm9, C77370, Pcna, Lig3, Mcm4, Phb,
GO:0051960	regulation of nervous sys	0.02866 ( 96 of 3350 genes )	0.01426 ( 485 of 34011 annotated genes )	4.242e-12	1.986e-08	Rara, Psen1, Ywhah, Anapc2, Bcl11b, Spg20, Id2, 2400003C14Rik, Sez6, Hmg20b, Snw1, Ctnna1, Rapgef4, Lgals1, Spag9, Dab1, Ppp2r5d, Sipa1l1, Ncs1, Rgs14, Lrp6, Tspo, Trp53, Ptk7, Il6st, Dpysl2, Zhx2, Prkch, Calr, Rtn4, Klk6, Bcl2, Hdac1, Lrrk2, Ccl5, Ntrk3, Lif, Fxn, Neurod1, Sema3a, Barhl2, Dnmt3b, Fig4, Rufy3, Rela, Ssh1, Zeb1, Gsk3b, Ssh2, Nrcam, Vim, Arhgap4, Ptpra, Ilk, Ngef, Tnik, Cntn1, Prex…
GO:0031344	regulation of cell projec	0.01970 ( 66 of 3350 genes )	0.00826 ( 281 of 34011 annotated genes )	4.394e-12	2.057e-08	Wasl, Psen1, Ywhah, Myo10, Ift46, Anapc2, Ccr7, Spg20, Hsp90aa1, 2400003C14Rik, Sez6, Rapgef4, Lgals1, Dab1, Ppp2r5d, Sipa1l1, Gpm6a, Ncs1, Ptk7, Apc, Rtn4, Klk6, Lrrk2, 1810046J19Rik, Ntrk3, Fxn, Lif, Sema3a, Barhl2, Fig4, Rufy3, Ssh1, Gsk3b, Ssh2, Nrcam, Rab8b, Arhgap4, Vim, Ilk, Ngef, Cntn1, Tnik, Prex1, Numb, Prkcd, Pten, Ndel1, Trpv2, Actr3, Pafah1b1, Cdh4, Sema4d, Caprin1, Syne1, Fyn, Cacna…
GO:0051090	regulation of transcripti	0.02030 ( 68 of 3350 genes )	0.00867 ( 295 of 34011 annotated genes )	5.252e-12	2.458e-08	Rhebl1, Prkcb, Smad7, Nfkbid, Id2, Tax1bp1, Egln1, Prkd2, Ddit3, Ikbkb, Crtc3, Lrp6, Flna, Usp7, Psmd10, Rps3, Prkch, Foxn3, Rnf31, Pim1, Nlrc5, Crebzf, Foxp2, Nlrc3, Pycard, Il10, Hmgn3, Neurod1, Itgb2, Trib2, Rela, Tlr2, Foxp3, Foxp1, Irak2, Crebbp, Foxo1, Prdx3, Mtpn, Arrb2, Hdac4, Pten, Foxk1, Tgfb1, Sigirr, Npm1, Trim21, Foxj3, Vegfa, Card11, Sp100, Foxo4, Map2k5, Zcchc11, Ep300, Ube2v1, Tri…
GO:0090046	regulation of transcripti	0.02030 ( 68 of 3350 genes )	0.00867 ( 295 of 34011 annotated genes )	5.252e-12	2.458e-08	Rhebl1, Prkcb, Smad7, Nfkbid, Id2, Tax1bp1, Egln1, Prkd2, Ddit3, Ikbkb, Crtc3, Lrp6, Flna, Usp7, Psmd10, Rps3, Prkch, Foxn3, Rnf31, Pim1, Nlrc5, Crebzf, Foxp2, Nlrc3, Pycard, Il10, Hmgn3, Neurod1, Itgb2, Trib2, Rela, Tlr2, Foxp3, Foxp1, Irak2, Crebbp, Foxo1, Prdx3, Mtpn, Arrb2, Hdac4, Pten, Foxk1, Tgfb1, Sigirr, Npm1, Trim21, Foxj3, Vegfa, Card11, Sp100, Foxo4, Map2k5, Zcchc11, Ep300, Ube2v1, Tri…
GO:0043549	regulation of kinase acti	0.02985 ( 100 of 3350 genes )	0.01517 ( 516 of 34011 annotated genes )	5.613e-12	2.628e-08	Hspa5, Lats1, Psen1, Adam17, Ccr7, Gnb2l1, Ptpn6, Map3k5, Vapb, Gba, Dusp19, Ttn, Trim27, Spag9, Dab1, Ccnk, Kat2b, Rgs14, Lrp6, Hsp90ab1, Psmd10, Dnajc3, Apc, Lax1, Csk, Pik3r1, Pim1, Hmgcr, Prkar1a, Nlrc5, Frs2, Abi1, Tgfbr2, Map4k1, Araf, Kiss1r, Zfp622, Dusp7, Dlg1, Lrrk2, Robld3, Rad50, Itgb3, Ccl5, Map4k2, Agap2, Dgka, Ptprc, Map2k7, Gnai2, Nckap1l, Rap2c, Raf1, Pik3ip1, Ccnl2, Tspyl2, Madd…
GO:0055114	oxidation-reduction proce	0.04567 ( 153 of 3350 genes )	0.02699 ( 918 of 34011 annotated genes )	5.799e-12	2.715e-08	Suclg1, Pcdh12, Cox4i1, Ndufc2, Sh3bgrl3, Nsdhl, Hsd11b1, Ndufa9, Pdpr, Agps, Kdm5d, Cyc1, Txnl1, Dlst, Aco1, Ldhd, Ndufa10, Uqcr11, Oxa1l, Kdm2a, Ido2, Hsdl2, Dnajc10, Mthfd1l, Mdh2, Duox1, Kdm6a, Akt2, Uqcrc1, Ndor1, Hmgcr, Alox5, Ppp1cb, Idh3g, Park7, Dhrs7c, Gpx3, Cox6b2, Retsat, Fxn, Adipor2, Pgam1, Mat2b, Cyp4a32, Gsk3b, Gnas, Gsr, Prdx3, Cyp4v3, Cox7a2, Txnrd3, Sod1, Adhfe1, Scd1, Dus2l, B…
GO:0030099	myeloid cell differentiat	0.01791 ( 60 of 3350 genes )	0.00720 ( 245 of 34011 annotated genes )	6.373e-12	2.983e-08	Stat5b, Inpp5d, Casp8, Nbeal2, Ldb1, Il25, Sp3, Rara, Ets1, Chuk, Psen1, Cdc73, Gnas, Prdx3, Thoc5, Ndfip1, Id2, Cbfb, Tesc, Rcor1, Mll5, Hcls1, Tgfb1, Pknox1, Notch2, Maea, Add1, Rps14, Myst3, Med1, Clec2i, Tm7sf4, Vegfa, Tob2, Rps19, Apc, Pik3r1, Rps6, Clec2d, Tfrc, Exoc6, Tgfbr2, Rnf41, Leo1, Myh9, Ikzf1, Kdm1a, Runx1, Lef1, Ncor1, Itgb3, Ccl5, Nme2, Lif, Csf2, Paf1, Ogt, Stap1, Nckap1l, Mapk1…
GO:0016573	histone acetylation	0.01075 ( 36 of 3350 genes )	0.00315 ( 107 of 34011 annotated genes )	6.646e-12	3.111e-08	Usp22, Ldb1, Kat2a, Foxp3, Ctcf, Brd8, Brd7, Brd1, Ep400, Crebbp, Csrp2bp, Ing4, Tgfb1, Ruvbl2, Morf4l1, Nat15, Epc1, Kat2b, Myst3, Brca1, Ep300, Tada3, Hcfc1, Brd4, Lef1, Taf1, Paxip1, Brpf3, Yeats4, Mll1, Ncoa3, Ogt, Mgea5, Myst4, Ncoa1, Ing3,
GO:0071826	ribonucleoprotein complex	0.00896 ( 30 of 3350 genes )	0.00229 ( 78 of 34011 annotated genes )	7.658e-12	3.585e-08	Pum2, Bat1a, Rps2, Ptbp2, Srpk2, Mbnl1, Eftud1, Rps6, Rps25, Celf2, Rpsa, Nufip1, Srsf2ip, Sbds, Prmt5, Lsm14a, Dicer1, Srsf10, Rpl24, Dync1h1, Prpf31, Patl1, Rbm5, Kif5b, Ddx6, Rps14, Eif3d, Zrsr2, Rps17, Celf1,
GO:0008284	positive regulation of ce	0.03403 ( 114 of 3350 genes )	0.01829 ( 622 of 34011 annotated genes )	8.082e-12	3.783e-08	Stat5b, Prkaa1, Trpm4, Rara, Mta3, Ets1, Birc6, Cav2, Adam17, Ccr7, Id2, Spn, Tns3, Ptpn6, Prkd2, Hcls1, Bmp5, St8sia1, S100a13, Pggt1b, Lrp6, Il12rb1, Cnbp, Tspo, Pitx2, Il6st, Akr1b3, Wdr77, Cd47, Prkch, Calcrl, Hmgcr, Stat1, Calr, Tgfbr2, Foxp2, Bcl2, Hdac1, Dlg1, Rbpj, Npy5r, Itgal, Itgb3, Ccl5, Lif, Fxn, Agap2, Coro1a, Fnta, Cyba, Ptprc, Gnai2, Nckap1l, Hbegf, Derl2, Cdk4, Rela, Foxp3, Foxp1…
GO:0006417	regulation of translation	0.01403 ( 47 of 3350 genes )	0.00494 ( 168 of 34011 annotated genes )	8.506e-12	3.982e-08	Eif4e3, Eif4e2, Pum2, Uhmk1, Rara, Paip1, Pum1, Ndufa13, Gnb2l1, Eif2c1, Tnrc6b, Ireb2, Aco1, Tnrc6a, Eif5b, Patl1, Elavl1, Eif4ebp1, Rps14, Eif3k, Eif5a, Rbm3, Fmr1, Mif4gd, Ppp1r15a, Akt2, Caprin1, Sarnp, Eif2b2, Eif4g2, Ep300, Cpeb3, Pa2g4, Calr, Rps6kb2, Rgs2, Dnajc1, Paip2, Ppp1ca, Rps5, Rps4x, Lsm14a, Qk, Aarsd1, Barhl2, Impact, Pcbp1,
GO:0051093	negative regulation of de	0.03015 ( 101 of 3350 genes )	0.01552 ( 528 of 34011 annotated genes )	9.78e-12	4.578e-08	Stat5b, Bai2, Med14, Rara, Frzb, Psen1, Nfkbid, Ywhah, Smc1a, Wee2, Spg20, Krit1, Id2, Sez6, Ctnna1, Ddit3, Dab1, Pde3b, Rock1, Mbnl3, Lrp6, Clec2i, Tspo, Trp53, Ankrd17, Apc, Pik3r1, Zhx2, Nipbl, Tcf7l1, Stat1, Calr, Tgfbr2, Rtn4, Ctla4, Bcl2, Stag2, Lrrk2, Runx1, Rbpj, Bcor, Itgb3, Tcfap2c, Ntrk3, Lif, Luc7l, Paf1, Sema3a, Usp19, Ifnb1, Rufy3, Inpp5d, Trib2, Med15, Ldb1, Ncor2, Zeb1, Gsk3b, Smc…
GO:0022618	ribonucleoprotein complex	0.00866 ( 29 of 3350 genes )	0.00218 ( 74 of 34011 annotated genes )	9.842e-12	4.607e-08	Pum2, Bat1a, Rps2, Ptbp2, Srpk2, Mbnl1, Eftud1, Rps6, Rps25, Celf2, Rpsa, Nufip1, Srsf2ip, Sbds, Prmt5, Lsm14a, Dicer1, Srsf10, Rpl24, Dync1h1, Prpf31, Patl1, Rbm5, Ddx6, Rps14, Eif3d, Zrsr2, Rps17, Celf1,
GO:0000904	cell morphogenesis involv	0.02866 ( 96 of 3350 genes )	0.01452 ( 494 of 34011 annotated genes )	1.262e-11	5.908e-08	Tyro3, Mycbp2, Actb, Psen1, Dlg4, Ywhah, Bcl11b, Anapc2, B3gnt2, Spg20, 2400003C14Rik, Atg7, Bves, Nfatc1, Dab1, Sipa1l1, Nfasc, Rock1, Lrp6, Flna, Apc, Stxbp1, Rtn4rl1, Rtn4, Bcl2, Smad4, Hnrnpab, Evl, Picalm, Lrrk2, Rbpj, Trim28, Cul3, Ntrk3, Lif, Fxn, Sema3a, Barhl2, Rufy3, Egr2, Vasp, Ssh1, Creb1, Igf1r, Gsk3b, Ssh2, Foxp1, Tctn1, Nrcam, Vim, Arhgap4, Fgfr2, Ilk, Ngef, Tnik, Sod1, Kidins220, …
GO:0007155	cell adhesion	0.04090 ( 137 of 3350 genes )	0.02358 ( 802 of 34011 annotated genes )	1.295e-11	6.06e-08	Stat5b, Pcdh12, Adam12, Wisp2, Abi3bp, Smad7, Cd164, Scarb2, Amigo3, Cd99l2, Lgals1, Bves, Pde3b, Rock1, Apc, Sell, Itgb6, Tln1, Ppp1cb, Ly9, Lgals9, Bcl2, Rpsa, Col16a1, Rbpj, Itgb3, Ccl5, Ptprc, Itga6, Stxbp3a, Pcdhb3, Dsg1a, Itgb2, Itga4, Gsk3b, Nrcam, Mag, Cpxm2, Ilk, Ppp1r12a, Prkcd, Pten, Cdhr1, Tgfb1, Col8a2, Nr2c2ap, Notch1, Brca1, Cd96, Vegfa, Itgb4, Celsr3, Pip5k1a, Atp2c1, B4galt1, Utr…
GO:0051050	positive regulation of tr	0.02806 ( 94 of 3350 genes )	0.01411 ( 480 of 34011 annotated genes )	1.319e-11	6.176e-08	Uaca, Gabbr1, Exoc2, Plcd1, Ak1, Wasl, Cherp, Npy2r, Ccr7, Adora3, Hsp90aa1, Tesc, Ikbkb, A930001N09Rik, Atad1, Stk39, Ppt1, Adrbk1, Ncs1, Hsp90ab1, Flna, Tspo, Stim1, Dpysl2, Sgip1, Dnm1l, Akt2, Cd47, Stxbp1, Calr, Rtn4, Tmem173, Smad4, Park7, Kiss1r, Pycard, Ahcyl1, Ubr5, Itpr1, Dlg1, Bin1, Il10, Ccl5, Lif, Adipor2, Nckap1l, Mgea5, Dbi, Psmd9, Rab9, Tlr2, Irf3, Creb1, Rph3al, Gsk3b, Rab8b, Gnas…
GO:0006873	cellular ion homeostasis	0.03224 ( 108 of 3350 genes )	0.01714 ( 583 of 34011 annotated genes )	1.465e-11	6.857e-08	Rims4, Immt, Ndufs1, Cul5, Trpm4, Prkcb, Plcd1, Rara, Atp2a1, Smad7, Psen1, Dlg4, Cherp, Npy2r, Spg20, Atox1, Slc30a2, Atp2a2, Slc17a7, Atp5b, Sez6, Fis1, Tesc, Vapb, Aco1, Ppt1, Nfasc, Gria1, Lrp6, Tspo, Trp53, Il6st, Akt2, Ppp3ca, Gna13, Bcap31, Bcl2, Park7, Dld, Dhrs7c, Itpr1, Dlg1, Lrrk2, Diap1, Itgb3, Ccl5, Fxn, Abcb7, Ptprc, Mgea5, Kcnq2, Dbi, Abcc2, Sypl2, Gnpat, Chrnd, Egr2, Cd52, Nab1, M…
GO:0045859	regulation of protein kin	0.02806 ( 94 of 3350 genes )	0.01417 ( 482 of 34011 annotated genes )	1.678e-11	7.856e-08	Hspa5, Lats1, Psen1, Adam17, Ccr7, Gnb2l1, Ptpn6, Map3k5, Vapb, Gba, Dusp19, Ttn, Trim27, Spag9, Dab1, Ccnk, Kat2b, Rgs14, Lrp6, Hsp90ab1, Psmd10, Dnajc3, Apc, Lax1, Csk, Pim1, Hmgcr, Prkar1a, Frs2, Abi1, Tgfbr2, Map4k1, Araf, Kiss1r, Dusp7, Dlg1, Lrrk2, Robld3, Itgb3, Ccl5, Map4k2, Agap2, Dgka, Ptprc, Map2k7, Gnai2, Nckap1l, Rap2c, Raf1, Ccnl2, Tspyl2, Madd, Igf1r, Gsk3b, Iqgap1, Ccnd2, Map2k2, …
GO:0006605	protein targeting	0.02179 ( 73 of 3350 genes )	0.00991 ( 337 of 34011 annotated genes )	2.078e-11	9.728e-08	Uaca, Cfl1, Uhmk1, Cherp, Hsp90aa1, Scarb2, Tesc, Tomm20, Ehd3, Nfasc, Hspa9, Hsp90ab1, Flna, Trp53, Psmd10, Mff, Ppp3ca, Pik3r1, Pde2a, Calr, Oprd1, l7Rn6, Tmem173, Smad4, Ahcyl1, Ubr5, Kpnb1, Xpo6, Hspa4, Mgea5, Xpo7, Samm50, Snupn, Egr2, Tlr2, Arntl, Erbb2ip, Gsk3b, Ogg1, Spnb2, Tnpo3, Rab8b, Macf1, Nup155, Xpo1, Nop58, Rab27a, Tgfb1, Rpl11, Creb3, Os9, Med1, Kpna6, Eif5a, Exoc4, Pip5k1a, Ap3b…
GO:0055082	cellular chemical homeost	0.03373 ( 113 of 3350 genes )	0.01835 ( 624 of 34011 annotated genes )	2.166e-11	1.014e-07	Rims4, Immt, Ndufs1, Cul5, Trpm4, Prkcb, Plcd1, Rara, Atp2a1, Smad7, Psen1, Dlg4, Cherp, Npy2r, Spg20, Atox1, Slc30a2, Atp2a2, Slc17a7, Atp5b, Sez6, Fis1, Tesc, Vapb, Aco1, Ppt1, Nfasc, Gria1, Lrp6, Tspo, Trp53, Il6st, Akt2, Ppp3ca, Gna13, Bcap31, Hmgcr, Bcl2, Park7, Dld, Dhrs7c, Itpr1, Dlg1, Lrrk2, Diap1, Itgb3, Ccl5, Fxn, Abcb7, Neurod1, Hmgn3, Ptprc, Mgea5, Kcnq2, Dbi, Abcc2, Sypl2, Gnpat, Chr…
GO:0022610	biological adhesion	0.04090 ( 137 of 3350 genes )	0.02376 ( 808 of 34011 annotated genes )	2.216e-11	1.037e-07	Stat5b, Pcdh12, Adam12, Wisp2, Abi3bp, Smad7, Cd164, Scarb2, Amigo3, Cd99l2, Lgals1, Bves, Pde3b, Rock1, Apc, Sell, Itgb6, Tln1, Ppp1cb, Ly9, Lgals9, Bcl2, Rpsa, Col16a1, Rbpj, Itgb3, Ccl5, Ptprc, Itga6, Stxbp3a, Pcdhb3, Dsg1a, Itgb2, Itga4, Gsk3b, Nrcam, Mag, Cpxm2, Ilk, Ppp1r12a, Prkcd, Pten, Cdhr1, Tgfb1, Col8a2, Nr2c2ap, Notch1, Brca1, Cd96, Vegfa, Itgb4, Celsr3, Pip5k1a, Atp2c1, B4galt1, Utr…
GO:0080134	regulation of response to	0.03045 ( 102 of 3350 genes )	0.01597 ( 543 of 34011 annotated genes )	2.333e-11	1.092e-07	Uaca, Tyro3, Stat5b, Zc3hav1, Mapkapk2, Ccr7, Adora3, Spn, Ano6, Atg7, Stk39, Spag9, Il12rb1, Rnf168, Psmd10, Rps3, Gpx4, Akt2, Cd47, Pde2a, Tap1, Calcrl, Hmgcr, Gpx1, Nlrc5, Zmynd11, Rtn4, Tmem173, Park7, Pycard, Zfp622, Cd27, Pvr, Zfp110, Npy5r, Trim28, Setd8, Psmb4, Il10, Ccl5, Trim30a, Ntrk3, Map4k2, Map2k7, Il20rb, Cdc42se1, Ctla2a, Larp1, Hbegf, Tbk1, Uimc1, Tlr2, Rela, Irf3, Map4k4, Foxp3,…
GO:0050852	T cell receptor signaling	0.00657 ( 22 of 3350 genes )	0.00135 ( 46 of 34011 annotated genes )	2.748e-11	1.286e-07	Phpt1, Skap1, Cd247, Foxp3, Fyn, Cblb, Ubash3a, Rnf31, Psen1, Ccr7, Ptpn22, Ptpn6, Prkd2, Cd3e, Lck, Zap70, Malt1, Ptprc, Plcg1, Clec2i, Itk, Kcnn4,
GO:0030001	metal ion transport	0.03194 ( 107 of 3350 genes )	0.01714 ( 583 of 34011 annotated genes )	3.235e-11	1.514e-07	Hrh1, Trpm4, Prkcb, Atp2a1, Trpm5, Psen1, Kcnh1, Ywhah, Nalcn, Cherp, Slc20a1, Trpm6, Atox1, Slc30a2, Slc23a1, Nipa1, Atp2a2, Slc17a7, Tesc, Atp12a, Ikbkb, Trim27, Stk39, Nfatc1, Cacna2d2, Tpcn1, Plcg1, Gpm6a, Tspo, Stim1, Tmem66, Akt2, Atp1a1, Ppp3ca, Calcrl, Bcl2, Dhrs7c, Ahcyl1, Itpr1, Dlg1, Slc10a7, Diap1, Itpr2, Kcnj12, Ccl5, Coro1a, Ptprc, Mgea5, Kcnq2, Dbi, Hcn1, Slc12a7, Vdac1, Kcnh8, Anx…
GO:0042176	regulation of protein cat	0.01254 ( 42 of 3350 genes )	0.00429 ( 146 of 34011 annotated genes )	4.028e-11	1.886e-07	Mylip, Chek2, Trib2, Lpcat1, Rela, Arntl, Ubxn1, Smad7, Psen1, Ndfip1, Gnb2l1, Csnk1d, Mdm4, Xpo1, Pten, Sox17, Bat3, Psme3, A930001N09Rik, Ppp2ca, Flna, Psmd10, Nrd1, Apc, Wac, Fyn, Stub1, Cblb, Gpx1, Trib1, Psmd3, Banp, Smad4, Psmd2, Lrrk2, Taf1, Snx1, Il10, Trim30a, Agap2, Mad2l1, Rad23b,
GO:0010769	regulation of cell morpho	0.01403 ( 47 of 3350 genes )	0.00515 ( 175 of 34011 annotated genes )	4.046e-11	1.894e-07	Ssh1, Gsk3b, Ssh2, Psen1, Ywhah, Vim, Anapc2, Arhgap4, Spg20, Ngef, Ilk, 2400003C14Rik, Tnik, Numb, Pten, Trpv2, Tgfb1, Smad2, Ndel1, Ppp2ca, Pafah1b1, Actr3, Dab1, Sipa1l1, Notch1, Cdh4, Sema4d, Syne1, Caprin1, Cacna1a, Ep300, Ttc3, Rtn4, Smad4, Mark2, Mif, Lrrk2, Lef1, Lrrc4c, Islr2, Lif, Fxn, Ntrk3, Barhl2, Sema3a, Stk24, Rufy3,
GO:0042274	ribosomal small subunit b	0.00478 ( 16 of 3350 genes )	0.00074 ( 25 of 34011 annotated genes )	4.072e-11	1.906e-07	Rrp36, Rps24, Rps2, Rps7, Rps21, Npm1, Rps6, Rps25, Rps16, Rps8, Rps28, Nob1, Rps14, Rpsa, Rps17, Rps19,
GO:0001816	cytokine production	0.02358 ( 79 of 3350 genes )	0.01126 ( 383 of 34011 annotated genes )	4.117e-11	1.927e-07	Stat5b, Zc3hav1, Trpm4, Rara, Mapkapk2, Lcp2, Adam17, Ccr7, Spn, Gba, Prkd2, Hsf1, Trim27, S100a13, Il12rb1, Clec2i, Tspo, Itk, Nfkb1, Csk, Ubash3a, Il17ra, Tmem173, Smad4, H2-Q1, Pycard, Arnt, Cd27, Dlg1, Ifnar1, Rbpj, Ccl5, Il10, Trim30a, Il20rb, Nckap1l, Zbtb32, Tbk1, Inpp5d, Trib2, Tlr2, Irf3, Rela, Creb1, Foxp3, Iqgap1, Polr3a, Ndfip1, Sod1, Arrb2, Prkcd, Tgfb1, Cd3e, Casp1, Sigirr, Il4ra, N…
GO:0051345	positive regulation of hy	0.02149 ( 72 of 3350 genes )	0.00985 ( 335 of 34011 annotated genes )	4.165e-11	1.95e-07	Uaca, Rasa2, Hspa5, Zc3hav1, Myo9b, Arhgap15, Plcd1, Ccr7, Gnb2l1, Map3k5, Fis1, Vapb, Sipa1l1, Dnajc10, Rgs14, Itk, Rps3, Akt2, Bcap31, Gna13, Arhgap1, Oprd1, Tbcd, Scrib, Pycard, Lrrk2, Bin1, Ccl5, Ahsa1, Arhgap9, Fnta, Nckap1l, Ifnb1, Tpm1, Arhgef10l, Terf1, Wrn, Gsk3b, Arhgap4, Fgfr2, Ralgapa2, Rasa1, Ccl11, Casp9, Ndel1, Psme3, Bax, Adcyap1r1, Creb3, Rasa3, Sema4d, Snx13, Cdkn1b, Pip5k1a, S1…
GO:0030182	neuron differentiation	0.04149 ( 139 of 3350 genes )	0.02443 ( 831 of 34011 annotated genes )	4.211e-11	1.971e-07	Mycbp2, Uhmk1, Rara, Ywhah, Bcl11b, Anapc2, 2400003C14Rik, Sez6, Rapgef4, Atg7, Lgals1, Sipa1l1, Cops2, Ppia, Apc, Zhx2, Psd4, Rtn4, Klk6, Bcl2, Hdac1, Evl, Picalm, Ppp1r9b, Rbpj, Ccl5, Tcfap2c, Ntrk3, Lif, Fxn, Sema3a, Barhl2, Hcn1, Rufy3, Vasp, Creb1, Igf1r, Zeb1, Gsk3b, Ssh2, Foxp1, Tctn1, Pax7, Nrcam, Arhgap4, Ngef, Ilk, Tnik, Sod1, Kidins220, Numb, Pten, Bnip2, Trpv2, Ndel1, Rpl24, Pafah1b1,…
GO:0007059	chromosome segregation	0.01194 ( 40 of 3350 genes )	0.00397 ( 135 of 34011 annotated genes )	4.263e-11	1.996e-07	Ino80, Smc5, Ctcf, Nuf2, Lats1, Top3b, Smc3, Smc1a, Top1, Dis3l2, Bub3, Pds5b, Msh5, Rad21, Ndel1, Cdc23, Nat15, Arl8a, Nsmce2, Rgs14, Pttg1, Brca1, Sgol1, Fam96a, Apc, Hjurp, Ciao1, Nipbl, Ebna1bp2, Brd4, Arl8b, Stag2, Srpk1, Smc4, Apitd1, Rcc1, Ncapg, Mad2l1, Racgap1, Usp9x,
GO:0072358	cardiovascular system dev	0.03761 ( 126 of 3350 genes )	0.02146 ( 730 of 34011 annotated genes )	4.298e-11	2.012e-07	Col4a3bp, Bai2, Prkcb, Plcd1, Rara, Pnpla6, Frzb, Ets1, Smad7, Psen1, Nsdhl, Npy2r, Krit1, Id2, Trp53bp2, Egln1, Atp5b, Gpi1, Setd2, Prkd2, Ttn, Chd7, Atg7, Nfatc1, Adrbk1, Plcg1, Pde3b, Ece1, Rock1, Lrp6, Pitx2, Ankrd17, Ubp1, Vezf1, Nfatc3, Gna13, Lox, Prkdc, Nipbl, Calcrl, Gpx1, Frs2, Stat1, Tgfbr2, Rtn4, Runx1, Lama1, Erap1, Rbpj, Npy5r, Paxip1, Bcor, Ddah1, Itgb3, Ccl5, Rapgef1, Lif, Hbegf, …
GO:0072359	circulatory system develo	0.03761 ( 126 of 3350 genes )	0.02146 ( 730 of 34011 annotated genes )	4.298e-11	2.012e-07	Col4a3bp, Bai2, Prkcb, Plcd1, Rara, Pnpla6, Frzb, Ets1, Smad7, Psen1, Nsdhl, Npy2r, Krit1, Id2, Trp53bp2, Egln1, Atp5b, Gpi1, Setd2, Prkd2, Ttn, Chd7, Atg7, Nfatc1, Adrbk1, Plcg1, Pde3b, Ece1, Rock1, Lrp6, Pitx2, Ankrd17, Ubp1, Vezf1, Nfatc3, Gna13, Lox, Prkdc, Nipbl, Calcrl, Gpx1, Frs2, Stat1, Tgfbr2, Rtn4, Runx1, Lama1, Erap1, Rbpj, Npy5r, Paxip1, Bcor, Ddah1, Itgb3, Ccl5, Rapgef1, Lif, Hbegf, …
GO:0055085	transmembrane transport	0.04239 ( 142 of 3350 genes )	0.02514 ( 855 of 34011 annotated genes )	4.351e-11	2.037e-07	Uaca, Hrh1, Trpm4, Atp2a1, Slc22a18, Trpm6, Hsp90aa1, Slc30a2, Slc23a1, Nipa1, Atp2a2, Clcn1, Uqcr11, Cacna2d2, Tpcn1, Flna, Hiat1, Pde2a, Tap1, Bcl2, Park7, Atp6v1g1, Ubr5, Itpr1, Slc35b3, Slc6a6, Kcnj12, Kcnq2, Vdac3, Hcn1, Abcc2, Chrnd, Slc12a7, Tlr2, Slco6c1, Gsk3b, Clic1, Ryr3, Clcn7, Atp2b1, Atp6v0a2, Trpv2, Tgfb1, Slc9a8, Atp5a1, Atp5o, Cacna1c, Bax, Kcnc2, Trpc2, Slc16a2, Ipo8, Cox7c, Hom…
GO:0045664	regulation of neuron diff	0.02269 ( 76 of 3350 genes )	0.01067 ( 363 of 34011 annotated genes )	4.566e-11	2.137e-07	Rara, Psen1, Ywhah, Anapc2, Bcl11b, Spg20, Id2, 2400003C14Rik, Sez6, Hmg20b, Rapgef4, Lgals1, Spag9, Dab1, Ppp2r5d, Sipa1l1, Ncs1, Ptk7, Dpysl2, Zhx2, Calr, Rtn4, Klk6, Bcl2, Lrrk2, Ccl5, Ntrk3, Fxn, Lif, Neurod1, Sema3a, Barhl2, Dnmt3b, Fig4, Rufy3, Ssh1, Zeb1, Gsk3b, Ssh2, Nrcam, Vim, Arhgap4, Ilk, Ngef, Tnik, Cntn1, Prex1, Numb, Bnip2, Pten, Trpv2, Ndel1, Actr3, Pafah1b1, Cdh4, Notch1, Med1, S…
GO:0045619	regulation of lymphocyte	0.01015 ( 34 of 3350 genes )	0.00303 ( 103 of 34011 annotated genes )	4.596e-11	2.151e-07	Stat5b, Pcid2, Inpp5d, Foxp3, Zeb1, Rara, Clptm1, Nfkbid, Ccr7, Ndfip1, Id2, Hsp90aa1, Ptpn6, Zbtb7b, Il4ra, Il7r, Il2rg, Card11, Ap3b1, Itpkb, Ctla4, Rnf41, Tgfbr2, Ikzf1, Cd27, Ikzf3, Lck, Il15ra, Zap70, Ctla2a, Ptprc, Nckap1l, Ifnb1, H2-Oa,
GO:0009888	tissue development	0.05403 ( 181 of 3350 genes )	0.03443 ( 1171 of 34011 annotated genes )	4.897e-11	2.292e-07	Stat5b, Ercc3, Rara, Lats1, Frzb, Smad7, Nsdhl, Bcl11b, Krt27, Tbx6, Ttn, Atg7, Nfatc1, Cacna2d2, Rock1, Mbnl3, Flna, Psap, Vezf1, Apc, Gna13, Pde2a, Foxn3, Hmgcr, Tcf7l1, Rtn4, Krt9, Bcl2, Gpsm2, Ubn1, Hdac1, Myl6, Rbpj, Bcor, Il10, Agpat6, Tcfap2c, Lif, Agap2, Luc7l, Paf1, Sema3a, Chrnd, Rela, Vasp, Kat2a, Itga4, Igf1r, Zeb1, Nab1, Gsk3b, Chuk, Foxp1, Tctn1, Pax7, Cdc73, Gnas, Ilk, 4932438A13Ri…
GO:0042113	B cell activation	0.01403 ( 47 of 3350 genes )	0.00517 ( 176 of 34011 annotated genes )	5.013e-11	2.346e-07	Stat5b, Pcid2, Inpp5d, Prkcb, Foxp3, Sp3, Igbp1, Foxp1, Adam17, Ndfip1, Id2, Ptpn6, Cd86, Prkcd, Lgals8, Tgfb1, Clcf1, Lgals1, Bax, Stat6, Il7r, Trp53, Rnf168, Il2rg, Card11, Lax1, Nfatc2, Pik3r1, Prkdc, Ctla4, Lig4, Bcl2, Ikzf1, Cd27, Mif, Lef1, Rbpj, Ikzf3, Paxip1, Hspd1, Rag1, Il10, Malt1, Ptprc, Nckap1l, Pik3cd, Samsn1,
GO:0032269	negative regulation of ce	0.01731 ( 58 of 3350 genes )	0.00717 ( 244 of 34011 annotated genes )	5.117e-11	2.395e-07	Kdm3a, Foxp3, Ubxn1, Rara, Igbp1, Smad7, Psen1, Ndufa13, Gnb2l1, Eif2c1, Ube2b, Ptpn6, Prkcd, Ireb2, Hmg20b, Arrb2, Pten, Tnrc6a, Igfbp3, Tgfb1, Bat3, Usp4, Patl1, Trim21, Eif4ebp1, Bax, Cr1l, Dnajc10, Lrp6, Brca1, Sema4d, Fmr1, Wac, Pik3r1, Caprin1, Cpeb3, Fkbp1a, Calr, Ywhae, Paip2, Dnmt1, Mif, Kdm1a, Gas1, Tinf2, Jarid2, Bcor, Acer2, Il10, Itgb3, Hspa4, Ptprc, Ctla2a, Mgea5, Dnmt3b, Impact, Ma…
GO:0032990	cell part morphogenesis	0.02806 ( 94 of 3350 genes )	0.01447 ( 492 of 34011 annotated genes )	5.423e-11	2.539e-07	Col4a3bp, Mycbp2, Myo9b, 1700019E19Rik, Actb, Psen1, Dlg4, Asap1, Ywhah, Bcl11b, Anapc2, B3gnt2, Spg20, 2400003C14Rik, Als2cr4, Fis1, Atg7, Dab1, Sipa1l1, Nfasc, Gpm6a, Flna, Apc, Mff, Dnm1l, Ift140, Stxbp1, Rtn4rl1, Rtn4, Lrrc50, Bcl2, Dync2h1, Evl, Picalm, Lrrk2, Wdr19, Rab8a, Itgb3, Ntrk3, Fxn, Sema3a, Barhl2, Rufy3, Egr2, Vasp, Ssh1, Creb1, Igf1r, Gsk3b, Ssh2, Foxp1, Tctn1, Nrcam, Ift80, Vim,…
GO:0032318	regulation of Ras GTPase	0.01284 ( 43 of 3350 genes )	0.00450 ( 153 of 34011 annotated genes )	5.468e-11	2.56e-07	Rasa2, Myo9b, Arhgap15, Gsk3b, Arhgap4, Arfgap3, Arfgef1, Ralgapa2, Ccr7, D630037F22Rik, Acap1, Rasa1, Ccl11, Ndel1, Pafah1b1, Bves, Sipa1l1, Rasa3, Sema4d, Rictor, Rabgap1, Tbc1d14, S1pr1, Pip5k1a, Tbc1d23, Akt2, Git2, Acap2, Arhgap1, Epha5, Agfg1, Scrib, Rapgef2, Tbc1d15, Ralbp1, Tbc1d5, Gmip, Rap1gds1, Agap2, Nckap1l, Tbc1d10c, Rasal3, Arhgef10l,
GO:0050801	ion homeostasis	0.03403 ( 114 of 3350 genes )	0.01885 ( 641 of 34011 annotated genes )	5.613e-11	2.627e-07	Rims4, Immt, Ndufs1, Cul5, Trpm4, Prkcb, Plcd1, Rara, Atp2a1, Smad7, Psen1, Dlg4, Cherp, Npy2r, Spg20, Atox1, Slc30a2, Atp2a2, Slc17a7, Atp5b, Sez6, Fis1, Tesc, Atp12a, Vapb, Aco1, Ppt1, Nfasc, Gria1, Lrp6, Tspo, Trp53, Il6st, Akt2, Ppp3ca, Gna13, Bcap31, Bcl2, Park7, Dld, Dhrs7c, Itpr1, Dlg1, Lrrk2, Diap1, Itgb3, Ccl5, Fxn, Abcb7, Ptprc, Mgea5, Kcnq2, Dbi, Abcc2, Sypl2, Gnpat, Chrnd, Egr2, Cd52,…
GO:0043547	positive regulation of GT	0.01045 ( 35 of 3350 genes )	0.00320 ( 109 of 34011 annotated genes )	5.769e-11	2.701e-07	Rasa2, Myo9b, Arhgap15, Gsk3b, Arhgap4, Ralgapa2, Ccr7, Gnb2l1, Rasa1, Ccl11, Ndel1, Sipa1l1, Rasa3, Rgs14, Snx13, Sema4d, Pip5k1a, S1pr1, Akt2, Arhgap1, Tbcd, Scrib, Rapgef2, Tbc1d15, Ralbp1, Lrrk2, Snx9, Bin1, Gmip, Rap1gds1, Arhgap9, Nckap1l, Arhgef10l, Racgap1, Rasal3,
GO:0010975	regulation of neuron proj	0.01672 ( 56 of 3350 genes )	0.00682 ( 232 of 34011 annotated genes )	5.797e-11	2.713e-07	Ssh1, Gsk3b, Ssh2, Psen1, Nrcam, Ywhah, Vim, Anapc2, Arhgap4, Spg20, Ngef, Ilk, 2400003C14Rik, Tnik, Cntn1, Sez6, Prex1, Numb, Pten, Trpv2, Rapgef4, Ndel1, Pafah1b1, Lgals1, Actr3, Dab1, Ppp2r5d, Sipa1l1, Ncs1, Cdh4, Ptk7, Sema4d, Syne1, Caprin1, Cacna1a, Fyn, Ep300, Rtn4, Klk6, Mark2, Mif, Lrrk2, Lrrc4c, Islr2, Fxn, Il15ra, Lif, Nme2, Ntrk3, Sema3a, Barhl2, Stk24, Fig4, Cspg4, Rufy3, Ret,
GO:0051493	regulation of cytoskeleto	0.01731 ( 58 of 3350 genes )	0.00720 ( 245 of 34011 annotated genes )	6.086e-11	2.849e-07	Cfl1, Tmsb10, Terf1, Phpt1, Mycbp2, Cep250, Ssh1, Wasl, Ssh2, Lats1, Spnb2, Capza1, Pfn2, Arfgef1, Ilk, Hsph1, Xpo1, Rasa1, Prex1, Prkcd, Cep192, Ccl11, Capzb, Senp6, 6720463M24Rik, Npm1, Actr3, Add1, Clec2i, Rictor, Apc, S1pr1, Pfn1, Cdkn1b, Ep300, Mapre1, Epha5, Tbcd, Kiss1r, Sbds, Evl, Mark2, Clip1, Dlg1, Rdx, Lrp1, Fkbp4, Coro1a, Nckap1l, Fhod1, Rnf4, Tmod3, Cyld, Tpm1, Spna2, Racgap1, Arhgef…
GO:0046651	lymphocyte proliferation	0.01463 ( 49 of 3350 genes )	0.00556 ( 189 of 34011 annotated genes )	6.181e-11	2.894e-07	Stat5b, Inpp5d, Itgb2, Psmb10, Satb1, Foxp3, Ccr7, Ndfip1, Ptpn22, Spn, Ptpn6, Cd86, Prkcd, Tgfb1, Cd3e, Clcf1, Bax, Il7r, Il12rb1, Clec2i, Trp53, Il6st, Tnfrsf14, Card11, Nfatc2, Fyn, Cblb, Rps6, Fkbp1a, Ctla4, Bcl2, Cd27, Dock2, Mif, Dlg1, Lef1, Ikzf3, Itgal, Hspd1, Ccl5, Il10, Zap70, Coro1a, Malt1, Ptprc, Il20rb, Nckap1l, Zbtb32, Elf4,
GO:0044262	cellular carbohydrate met	0.02597 ( 87 of 3350 genes )	0.01303 ( 443 of 34011 annotated genes )	6.476e-11	3.031e-07	B3galnt2, Pcdh12, Prkaa1, Stt3b, Plcd1, Fabp5, Taldo1, Psen1, Hsd11b1, B3gnt2, St6gal2, Ldha, Gpi1, Ugp2, Galnt1, St8sia1, Rpn2, Il6st, Gnptab, Akr1b3, Mdp1, Man2a1, Mdh2, Man2a2, Akt2, Pik3r1, Uggt1, Ppp1cb, Ogdh, Man2b1, Ppp1ca, Pdk1, G6pc3, Ppp1r3b, Inpp4b, St3gal1, Stt3a, Oas2, Mgea5, Pgam1, Cs, Mat2b, Arpp19, Cmah, Pgm3, Gsk3b, Arfgef1, Entpd5, Foxo1, Glt25d1, Npc1, Poglut1, Tsta3, Pten, Hda…
GO:0051168	nuclear export	0.00866 ( 29 of 3350 genes )	0.00232 ( 79 of 34011 annotated genes )	6.493e-11	3.039e-07	Egr2, Nup160, Bat1a, Uhmk1, Gsk3b, Sdccag1, Emd, Rps28, Nxf1, Calr, Thoc5, Nup155, Rpsa, Xpo1, Ahcyl1, Ddx39, Hnrnpa1, Lsg1, Tgfb1, Srsf10, Xpo6, Akap13, Npm1, Malt1, Xpo7, Hspa9, Thoc1, Pabpn1, Eif5a,
GO:0048193	Golgi vesicle transport	0.00985 ( 33 of 3350 genes )	0.00291 ( 99 of 34011 annotated genes )	6.557e-11	3.07e-07	Sec22b, Spnb2, Vamp4, Trappc3, Sec24a, Macf1, Cux1, Vti1a, Trappc2l, Stx5a, Copg2, Use1, Scfd1, Rab14, Rer1, Cog2, Copb1, Exoc4, Csk, Cog4, Cog6, Copz1, Golga4, Arfgef2, Nrbp1, Copb2, Uso1, Gas1, Cul3, Rab8a, Snx1, Rab1, Vps29,
GO:0032943	mononuclear cell prolifer	0.01463 ( 49 of 3350 genes )	0.00559 ( 190 of 34011 annotated genes )	7.564e-11	3.541e-07	Stat5b, Inpp5d, Itgb2, Psmb10, Satb1, Foxp3, Ccr7, Ndfip1, Ptpn22, Spn, Ptpn6, Cd86, Prkcd, Tgfb1, Cd3e, Clcf1, Bax, Il7r, Il12rb1, Clec2i, Trp53, Il6st, Tnfrsf14, Card11, Nfatc2, Fyn, Cblb, Rps6, Fkbp1a, Ctla4, Bcl2, Cd27, Dock2, Mif, Dlg1, Lef1, Ikzf3, Itgal, Hspd1, Ccl5, Il10, Zap70, Coro1a, Malt1, Ptprc, Il20rb, Nckap1l, Zbtb32, Elf4,
GO:0008361	regulation of cell size	0.02209 ( 74 of 3350 genes )	0.01041 ( 354 of 34011 annotated genes )	8.817e-11	4.127e-07	Ino80, Cfl1, Wisp2, Frzb, Adam17, Anapc2, Spg20, Ndufa13, Gnb2l1, Eno1, Hsp90aa1, 2400003C14Rik, Usp47, Atp6v0e, Sbf1, Ppt1, Hsp90ab1, Trp53, Rbbp7, Psmd10, Xrn2, Rtn4, Bcl2, Gng4, Smad4, Ppp1r9b, Robld3, Ntrk3, Adipor2, Fxn, Cyba, Sema3a, Barhl2, Hbegf, Derl2, Tspyl2, Creb1, Arhgap4, Entpd5, Ilk, Mtpn, 4932438A13Rik, Pten, Igfbp3, Trpv2, Tgfb1, Foxk1, Ndel1, Sox17, Notch2, Npm1, Pafah1b1, Nol8, …
GO:0007417	central nervous system de	0.03015 ( 101 of 3350 genes )	0.01614 ( 549 of 34011 annotated genes )	9.977e-11	4.67e-07	Tyro3, Hspa5, Mycbp2, Frzb, Utp3, Psen1, Bcl11b, Aldh1a3, Id2, Slc23a1, Trp53bp2, Setd2, Chd7, Atg7, Dab1, Ppt1, Lrp6, Trp53, Pitx2, Il6st, Tcf7, Atrx, Nr2c2, Rfx4, Prkdc, Nipbl, Frs2, Tcf7l1, Tgfbr2, Rtn4, Foxp2, Bcl2, Dync2h1, Hdac1, Ikzf1, Lrrk2, Runx1, Agtpbp1, Sepp1, Rbpj, Tcfap2c, Ntrk3, Lif, Neurod1, Stxbp3a, Lrp2, Gnpat, Egr2, Creb1, Kat2a, Ldb1, Ncor2, Foxp3, Igf1r, Llgl1, Zeb1, Gsk3b, T…
GO:0007050	cell cycle arrest	0.01612 ( 54 of 3350 genes )	0.00659 ( 224 of 34011 annotated genes )	1.331e-10	6.232e-07	Rfwd3, Pcid2, Chek2, Uimc1, Terf1, Ercc3, Uhmk1, Ak1, Mapkapk2, Usp28, Smc1a, Macf1, Chfr, Mdm4, Ilk, Id2, Bub3, Ing4, Cep192, Mll5, Ddit3, Tgfb1, Obfc2a, Hsf1, Rpl24, Notch2, Gas2l3, Trp53, Brca1, Apc, Foxo4, Wac, Cdkn1b, 3200002M19Rik, Rps6, Brcc3, Crlf3, Ptprv, Calr, Sesn3, Gas2, Tbrg1, Mif, Ezh2, Gas1, Ppm1g, Apbb2, Csnk2a1, Casp2, Neurod1, Ndrg1, Mapk14, Ppp2r5c, Mad2l1,
GO:0007015	actin filament organizati	0.01463 ( 49 of 3350 genes )	0.00567 ( 193 of 34011 annotated genes )	1.371e-10	6.416e-07	Cfl1, Tmsb10, Vasp, Ssh1, Wasl, Ssh2, Lats1, Spnb2, Ezr, Capza1, Pfn2, Arfgef1, Kctd13, Rasa1, Prex1, Prkcd, Ccl11, Hsp90b1, Ttn, Capzb, Actr3, Actn1, Add1, Flna, Clec2i, Rictor, S1pr1, Pfn1, Bcl2, Kiss1r, Evl, Dlg1, Rdx, Ppp1r9b, Diap1, Lcp1, Cul3, Coro1a, Tnnt2, Nckap1l, Fhod1, Myo1b, Sorbs1, Actn4, Arpc4, Tmod3, Tpm1, Spna2, Arhgef10l,
GO:0006916	anti-apoptosis	0.01552 ( 52 of 3350 genes )	0.00623 ( 212 of 34011 annotated genes )	1.482e-10	6.936e-07	Stat5b, Hspa5, Rela, Igf1r, Rara, Pgap2, Gsk3b, Psen1, Birc6, Adam17, Foxo1, Cflar, Tax1bp1, Sod1, Acaa2, Son, Rasa1, Tmbim4, Hsp90b1, Npm1, Polb, Ptma, Bax, Creb3, Hells, Hbxip, Dusp1, Qars, Vegfa, Sh3glb1, Nfkb1, Sgk3, Opa1, Pik3r1, Yme1l1, Aatf, Gpx1, Atf5, Rtn4, Dapk1, Bcl2, Mkl1, Cd27, Stambp, Lrp1, Npy5r, Hspd1, Il2rb, Csf2, Api5, Pea15a, Dad1,
GO:0007346	regulation of mitotic cel	0.01642 ( 55 of 3350 genes )	0.00682 ( 232 of 34011 annotated genes )	1.776e-10	8.315e-07	Stat5b, Rfwd3, Pcid2, Ino80, Terf1, Smc5, Usp22, Mta3, Brd7, Cdc73, Ywhah, Fgfr2, Chfr, Id2, Usp47, Ptpn6, Pkn2, Cep192, Pten, Tgfb1, Cdc23, 6720463M24Rik, Rpl24, Pafah1b1, Eif4ebp1, Nsmce2, Trp53, Apc, Foxo4, Cdkn1b, 3200002M19Rik, Aatf, Rps6, Crlf3, Ptprv, Camk2d, Brd4, Bcl2, Cdk11b, Scrib, Sbds, Dlg1, Rcc1, Gas1, Sik1, Apbb2, Casp2, Csnk2a1, Ilkap, C77370, Paf1, Cyld, Ptch1, Ppp2r5c, Mad2l1,
GO:0006413	translational initiation	0.00896 ( 30 of 3350 genes )	0.00256 ( 87 of 34011 annotated genes )	1.847e-10	8.644e-07	Fmr1, Eif4e3, Eif4e2, Eif3h, Rps2, Eif3c, Uhmk1, Rara, Eif4g2, Eif2b2, Eif4e1b, Rps6kb2, Eif3f, Denr, Eif4b, Paip2, Eif4enif1, Eif4a2, Eif3l, Brf1, Eif4a1, Eif5b, Eif3j, Eif4ebp1, Dhx29, Impact, Eif3d, Eif3g, Eif3k, Eif2s3x,
GO:0051258	protein polymerization	0.01194 ( 40 of 3350 genes )	0.00415 ( 141 of 34011 annotated genes )	1.851e-10	8.665e-07	Tmsb10, Terf1, Tuba8, Wasl, Tuba1b, Lats1, Spnb2, Capza1, Pfn2, Arfgef1, Rasa1, Prex1, Prkcd, Ccl11, Capzb, Actr3, Add1, Clec2i, Rictor, Apc, Cdkn1b, Dnm1l, Pfn1, Tuba1a, Mapre1, Tbcd, Tuba1c, Evl, Dlg1, Clip1, Rdx, Diap1, Fkbp4, Coro1a, Tuba4a, Nckap1l, Arpc4, Tmod3, Tpm1, Spna2,
GO:0031175	neuron projection develop	0.02955 ( 99 of 3350 genes )	0.01588 ( 540 of 34011 annotated genes )	1.858e-10	8.699e-07	Mycbp2, Uhmk1, Actb, Psen1, Dlg4, Ywhah, Bcl11b, Anapc2, B3gnt2, Spg20, 2400003C14Rik, Sez6, Rapgef4, Atg7, Lgals1, Dab1, Ppp2r5d, Sipa1l1, Nfasc, Gpm6a, Ncs1, Ptk7, Apc, Stxbp1, Rtn4rl1, Rtn4, Klk6, Bcl2, Evl, Picalm, Ppp1r9b, Lrrk2, Stx3, Lama1, Diap1, Ntrk3, Lif, Fxn, Sema3a, Barhl2, Fig4, Rufy3, Egr2, Vasp, Ssh1, Creb1, Igf1r, Gsk3b, Ssh2, Foxp1, Tctn1, Nrcam, Vim, Arhgap4, Fgfr2, Ilk, Ngef, …
GO:0034470	ncRNA processing	0.01463 ( 49 of 3350 genes )	0.00573 ( 195 of 34011 annotated genes )	2.02e-10	9.455e-07	Rrp36, Rps24, Eri1, Dis3, Rps16, Ddx56, Nob1, Rrp1, Rrp1b, Fbl, Nhp2, Rpl7, Rps7, Rpl11, Dus2l, Exosc1, Nol8, Rps8, Utp20, Wbp11, Utp6, 1110008L16Rik, Ints8, Rps19, D10Wsu52e, Nop14, Rpf1, Srrt, Zcchc11, Pdcd11, Rpl5, Rps6, Ints6, Pa2g4, Rps28, Ebna1bp2, Rpsa, Mphosph10, Sbds, Nsun2, Wdr4, Dicer1, Nop10, Trmt61a, Rps21, Emg1, Rps17, Trmt12, Ints1,
GO:0032940	secretion by cell	0.03045 ( 102 of 3350 genes )	0.01658 ( 564 of 34011 annotated genes )	2.188e-10	1.024e-06	Tyro3, Rims4, Gabbr1, Pram1, Exoc2, Prkcb, Plcd1, Lcp2, Psen1, Pfn2, Snapin, Npy2r, Ccr7, Adora3, Lat, Rapgef4, Chd7, Trim27, S100a13, Ppt1, Adrbk1, Plcg1, Pde3b, Scfd1, Ncs1, Gnptab, Dpysl2, Cplx2, Lax1, Dnm1l, Ppp3ca, Ap2b1, Stxbp1, Hmgcr, Rtn4, Scrib, Kiss1r, Pycard, Cd27, Stx3, Rbpj, Npy5r, Rab8a, Il10, Ccl5, Lif, Neurod1, Hmgn3, Mgea5, Stxbp3a, Psmd9, Lrp2, Rab9, Pi4k2a, Tlr2, Irf3, Creb1, R…
GO:0048667	cell morphogenesis involv	0.02269 ( 76 of 3350 genes )	0.01103 ( 375 of 34011 annotated genes )	2.265e-10	1.06e-06	Mycbp2, Actb, Psen1, Dlg4, Ywhah, Bcl11b, Anapc2, B3gnt2, Spg20, 2400003C14Rik, Atg7, Dab1, Sipa1l1, Nfasc, Apc, Stxbp1, Rtn4rl1, Rtn4, Bcl2, Evl, Picalm, Lrrk2, Ntrk3, Fxn, Sema3a, Barhl2, Rufy3, Egr2, Vasp, Creb1, Ssh1, Igf1r, Gsk3b, Ssh2, Foxp1, Tctn1, Nrcam, Vim, Arhgap4, Fgfr2, Ilk, Ngef, Tnik, Sod1, Kidins220, Numb, Pten, Trpv2, Ndel1, Actr3, Pafah1b1, Rpl24, Cdh4, Notch1, Runx3, Sema4d, Ce…
GO:0050684	regulation of mRNA proces	0.00627 ( 21 of 3350 genes )	0.00135 ( 46 of 34011 annotated genes )	2.329e-10	1.09e-06	U2af2, Srsf7, Mbnl1, Ptbp1, D11Bwg0517e, Cdc73, Cdk11b, Leo1, Srpk1, Ahcyl1, Ddx5, Srsf9, Sfswap, Rbmy1a1, Srsf10, Npm1, Hnrnpa2b1, Rbm25, Paf1, Rbm5, Safb,
GO:0070661	leukocyte proliferation	0.01463 ( 49 of 3350 genes )	0.00576 ( 196 of 34011 annotated genes )	2.445e-10	1.145e-06	Stat5b, Inpp5d, Itgb2, Psmb10, Satb1, Foxp3, Ccr7, Ndfip1, Ptpn22, Spn, Ptpn6, Cd86, Prkcd, Tgfb1, Cd3e, Clcf1, Bax, Il7r, Il12rb1, Clec2i, Trp53, Il6st, Tnfrsf14, Card11, Nfatc2, Fyn, Cblb, Rps6, Fkbp1a, Ctla4, Bcl2, Cd27, Dock2, Mif, Dlg1, Lef1, Ikzf3, Itgal, Hspd1, Ccl5, Il10, Zap70, Coro1a, Malt1, Ptprc, Il20rb, Nckap1l, Zbtb32, Elf4,
GO:0002697	regulation of immune effe	0.01463 ( 49 of 3350 genes )	0.00579 ( 197 of 34011 annotated genes )	2.956e-10	1.384e-06	Stat5b, Cd37, Tlr2, Irf3, Zc3hav1, Pram1, Trpm4, Foxp3, Rara, Foxp1, Pcbp2, Abr, Adora3, Ccr7, Ndfip1, Spn, Ptpn6, Mill2, Arrb2, Tgfb1, Clcf1, Il4ra, Pdpk1, Cr1l, Creb3, Ppp3cb, H2-T23, Stat6, Il7r, Il12rb1, Bcr, H2-D1, B2m, C3, H2-K1, Tap1, Clec2d, Tmem173, Dusp10, Pycard, Mif, Pvr, Paxip1, Hspd1, Ccl5, Il10, Malt1, Ptprc, Il20rb,
GO:0051270	regulation of cellular co	0.02418 ( 81 of 3350 genes )	0.01214 ( 413 of 34011 annotated genes )	3.113e-10	1.457e-06	Stat5b, Phpt1, Ets1, Adam17, Ccr7, Adora3, Krit1, Gnb2l1, Prkd2, Rapgef4, Pecam1, Spag9, Rnf20, Spata13, Plcg1, Ptp4a1, Trp53, Pitx2, Il6st, Apc, Sell, Akt2, Pik3r1, Gna13, Pkn1, Msn, Tgfbr2, Rtn4, Rnf41, Lrrc50, Bcl2, Kiss1r, Lama1, Diap1, 1810046J19Rik, Ccl5, Itgb3, Coro1a, Ptprc, Sema3a, Nckap1l, Rap2c, Hbegf, Tlr2, Igf1r, Arhgap4, Abr, Macf1, Map2k2, Ilk, Pkn2, Ccl11, Pten, Igfbp3, Tgfb1, Act…
GO:0031647	regulation of protein sta	0.00955 ( 32 of 3350 genes )	0.00291 ( 99 of 34011 annotated genes )	3.119e-10	1.46e-06	Mylip, Creb1, Smad7, Cdc73, Ift46, Ube2b, Tesc, Pten, Sox17, Bat3, Usp4, Npm1, Trim24, Trim21, Flna, Usp7, Morc3, Prkdc, Stxbp1, Calr, Hcfc1, Bcl2, Park7, Usp3, Tbrg1, Pex6, Apbb2, Hspd1, Usp19, Ccdc88c, Dsg1a, Nckap1,
GO:0051251	positive regulation of ly	0.01313 ( 44 of 3350 genes )	0.00491 ( 167 of 34011 annotated genes )	3.271e-10	1.531e-06	Stat5b, Pcid2, Inpp5d, Foxp3, Rara, Ccr7, Hsp90aa1, Spn, Hsph1, Cd5, Cd86, Lgals8, Tgfb1, Cd3e, Clcf1, Lgals1, Il4ra, Stat6, Il7r, Il12rb1, Il6st, Il2rg, Card11, Nfatc2, Ap3b1, Cd47, Itpkb, Tgfbr2, Bcl2, Ikzf1, Cd27, Mif, Paxip1, Itgal, Hspd1, Cd4, Ccl5, Lck, Zap70, Coro1a, Il15ra, Malt1, Ptprc, Nckap1l,
GO:0016049	cell growth	0.02060 ( 69 of 3350 genes )	0.00970 ( 330 of 34011 annotated genes )	3.716e-10	1.74e-06	Ino80, Wisp2, Frzb, Adam17, Anapc2, Spg20, Ndufa13, Gnb2l1, Eno1, 2400003C14Rik, Usp47, Atp6v0e, Sbf1, Ppt1, Trp53, Rbbp7, Psmd10, Xrn2, Rtn4, Bcl2, Gng4, Smad4, Ppp1r9b, Robld3, Ntrk3, Adipor2, Fxn, Cyba, Sema3a, Barhl2, Hbegf, Derl2, Tspyl2, Arhgap4, Entpd5, Ilk, Mtpn, 4932438A13Rik, Igfbp3, Trpv2, Foxk1, Ndel1, Sox17, Tgfb1, Notch2, Npm1, Pafah1b1, Nol8, Ei24, Creb3, Cdh4, Il7r, Pttg1, Tm7sf4,…
GO:0060627	regulation of vesicle-med	0.01612 ( 54 of 3350 genes )	0.00676 ( 230 of 34011 annotated genes )	3.792e-10	1.775e-06	Rims4, Rab9, Prkaa1, Pram1, Exoc2, Rph3al, Wasl, Dlg4, Vamp4, Pfn2, Ccr7, Abr, Adora3, Gnb2l1, Scyl2, Arrb2, Pten, Tgfb1, Rapgef4, Rab27a, Scarb1, Atad1, Pdpk1, Ppt1, Use1, Scfd1, Ncs1, Add1, Notch1, Bcr, Vegfa, Sgip1, Csk, C3, Syne1, Cadps, Cd47, Cacna1a, Hnrnpk, Stxbp1, B4galt1, Calr, Vamp8, Cnn2, Picalm, Gas1, Bin1, Tnk2, Cd2ap, Cacna1g, Nckap1l, Stxbp3a, Actn4, Nsf,
GO:0010639	negative regulation of or	0.01224 ( 41 of 3350 genes )	0.00441 ( 150 of 34011 annotated genes )	3.861e-10	1.807e-06	Pcid2, Tmsb10, Terf1, Kdm3a, Foxp3, Spnb2, Capza1, Pfn2, Fgfr2, Arfgef1, Ube2b, Prkcd, Cep192, Capzb, Npm1, Add1, Brca1, Psmd10, Apc, Pfn1, S1pr1, Opa1, 3200002M19Rik, Mapre1, Tbcd, Dnmt1, Sbds, Evl, Kdm1a, Rdx, Tinf2, Jarid2, Fkbp4, Bcor, Coro1a, Fxn, Tmod3, Dnmt3b, Tpm1, Spna2, Mad2l1,
GO:0046903	secretion	0.03373 ( 113 of 3350 genes )	0.01929 ( 656 of 34011 annotated genes )	4.861e-10	2.275e-06	Usf2, Tyro3, Stat5b, Rims4, Gabbr1, Pram1, Exoc2, Prkcb, Plcd1, Lcp2, Psen1, Pfn2, Snapin, Npy2r, Ccr7, Adora3, Mmp7, Lat, Rapgef4, Chd7, Trim27, S100a13, Ppt1, Adrbk1, Plcg1, Pde3b, Scfd1, Ncs1, Gnptab, Dpysl2, Cplx2, Lax1, Dnm1l, Ppp3ca, Ap2b1, Stxbp1, Hmgcr, Rtn4, Scrib, Kiss1r, Pycard, Cd27, Stx3, Rbpj, Npy5r, Rab8a, Il10, Ccl5, Agpat6, Lif, Neurod1, Hmgn3, Mgea5, Stxbp3a, Psmd9, Lrp2, Rab9, …
GO:0007420	brain development	0.02358 ( 79 of 3350 genes )	0.01185 ( 403 of 34011 annotated genes )	5.252e-10	2.458e-06	Tyro3, Hspa5, Frzb, Utp3, Psen1, Bcl11b, Aldh1a3, Id2, Slc23a1, Setd2, Atg7, Dab1, Ppt1, Lrp6, Pitx2, Tcf7, Atrx, Nr2c2, Rfx4, Prkdc, Nipbl, Frs2, Tcf7l1, Tgfbr2, Rtn4, Foxp2, Bcl2, Dync2h1, Hdac1, Ikzf1, Lrrk2, Agtpbp1, Sepp1, Rbpj, Tcfap2c, Neurod1, Stxbp3a, Lrp2, Gnpat, Egr2, Creb1, Kat2a, Ldb1, Ncor2, Foxp3, Igf1r, Llgl1, Gsk3b, Tctn1, Fgfr2, Abr, Cntn1, Numb, Pten, Bat3, Ndel1, Pafah1b1, Bax…
GO:0050777	negative regulation of im	0.00716 ( 24 of 3350 genes )	0.00179 ( 61 of 34011 annotated genes )	5.376e-10	2.517e-06	Tyro3, Inpp5d, Foxp3, Psma1, Tap1, Gpx1, Clec2d, Ctla4, Ndfip1, Spn, Dusp10, Ptpn6, Arrb2, Tgfb1, Trim27, Il10, Psmb4, Ptprc, Il20rb, Cr1l, Ppp3cb, Stat6, Il7r, Samsn1,
GO:0032271	regulation of protein pol	0.00955 ( 32 of 3350 genes )	0.00297 ( 101 of 34011 annotated genes )	5.544e-10	2.595e-06	Tmsb10, Terf1, Pfn1, Cdkn1b, Wasl, Lats1, Spnb2, Capza1, Pfn2, Mapre1, Arfgef1, Tbcd, Evl, Rasa1, Prex1, Clip1, Dlg1, Rdx, Prkcd, Ccl11, Capzb, Fkbp4, Actr3, Coro1a, Nckap1l, Add1, Clec2i, Tmod3, Tpm1, Spna2, Rictor, Apc,
GO:0002250	adaptive immune response	0.01403 ( 47 of 3350 genes )	0.00556 ( 189 of 34011 annotated genes )	6.803e-10	3.184e-06	Inpp5d, Trpm4, Foxp3, Adam17, Ccr7, Ndfip1, C1qb, Spn, Il18bp, C4bp, Ptpn6, Prkcd, C8a, Klhl6, Tgfb1, Rab27a, Clcf1, Trim27, Il4ra, Cr1l, Ppp3cb, H2-T23, Stat6, Il7r, Il12rb1, Itk, Vegfa, Rnf168, H2-D1, B2m, C3, Masp2, H2-K1, Tap1, Lig4, Dusp10, Mif, Dlg1, Pvr, Lef1, Paxip1, Hspd1, Malt1, Ptprc, Il20rb, Ifnb1, Samsn1,
GO:0070646	protein modification by s	0.00806 ( 27 of 3350 genes )	0.00223 ( 76 of 34011 annotated genes )	6.886e-10	3.223e-06	Uimc1, Usp22, Otud5, Kat2a, Atxn7, Usp28, Brcc3, Usp47, Usp3, Zranb1, Usp8, Stambp, Usp37, Senp6, Usp4, Cops5, Mysm1, Trim21, Cops2, Cops6, Usp20, Usp19, Usp26, Cyld, Usp7, Usp9x, Eny2,
GO:0033119	negative regulation of RN	0.00358 ( 12 of 3350 genes )	0.00047 ( 16 of 34011 annotated genes )	7.119e-10	3.332e-06	U2af2, Srsf7, Srsf9, Sfswap, Akt2, Ptbp2, Srsf10, Rps13, Npm1, Ptbp1, Hnrnpa2b1, Rps26,
GO:0007266	Rho protein signal transd	0.01343 ( 45 of 3350 genes )	0.00520 ( 177 of 34011 annotated genes )	7.256e-10	3.397e-06	Myo9b, Arhgef3, Arhgap15, Gsk3b, Chuk, Als2cl, Arfgef1, Arhgap4, Ccr7, Abr, Ngef, Arhgef18, Kctd13, Prex1, Ccl11, Ttn, Obscn, Ndel1, Pecam1, Pafah1b1, Bves, Spata13, Rock1, Bcr, Vav1, Sema4d, Rictor, Arhgef11, Itsn1, Pip5k1a, Gna13, Arhgdia, Arhgap1, Epha5, Scrib, Ralbp1, Trio, Rap1gds1, Arhgef1, Gmip, Cul3, Plekhg2, Nckap1l, Arhgef10l, Rock2,
GO:0048858	cell projection morphogen	0.02657 ( 89 of 3350 genes )	0.01408 ( 479 of 34011 annotated genes )	7.599e-10	3.557e-06	Mycbp2, Myo9b, 1700019E19Rik, Actb, Psen1, Dlg4, Asap1, Ywhah, Bcl11b, Anapc2, B3gnt2, Spg20, 2400003C14Rik, Als2cr4, Atg7, Dab1, Sipa1l1, Nfasc, Gpm6a, Flna, Apc, Ift140, Stxbp1, Rtn4rl1, Rtn4, Lrrc50, Bcl2, Dync2h1, Evl, Picalm, Lrrk2, Wdr19, Rab8a, Itgb3, Ntrk3, Fxn, Sema3a, Barhl2, Rufy3, Egr2, Vasp, Ssh1, Creb1, Igf1r, Gsk3b, Ssh2, Foxp1, Tctn1, Ift80, Nrcam, Vim, Arhgap4, Fgfr2, Ilk, Ngef, …
GO:0051259	protein oligomerization	0.02149 ( 72 of 3350 genes )	0.01058 ( 360 of 34011 annotated genes )	1.221e-09	5.716e-06	Prkaa1, Pcbd2, Nudt21, Cav2, Dgkd, Gnb2l1, Kctd13, Ctnna1, Cpsf6, Sqstm1, Crtc3, Trim27, Spag9, Oxa1l, Ehd3, Hgsnat, Trp53, Sh3glb1, Amfr, Bik, Mff, Dnm1l, Hmgcr, Evl, Gpx3, Rad50, Tmed10, Trim28, Ccl5, Olfm1, Crbn, Stxbp3a, Ccdc88c, Cuta, Gabra6, Terf1, Casp8, Vasp, Igf1r, Ilk, Atl3, Clpp, Npm1, Ppp2ca, Trim21, Pfkp, Bax, Prkab1, Hacl1, Lnx1, P2rx4, Ripk1, Trim34, Anxa5, Lims1, Mif, Hsd17b10, Sh…
GO:0001558	regulation of cell growth	0.01761 ( 59 of 3350 genes )	0.00797 ( 271 of 34011 annotated genes )	1.369e-09	6.41e-06	Ino80, Tspyl2, Wisp2, Frzb, Adam17, Anapc2, Arhgap4, Spg20, Ndufa13, Gnb2l1, Eno1, Ilk, 2400003C14Rik, Usp47, Mtpn, 4932438A13Rik, Igfbp3, Trpv2, Tgfb1, Sox17, Sbf1, Ndel1, Foxk1, Pafah1b1, Ppt1, Nol8, Ei24, Creb3, Cdh4, Pttg1, Trp53, Tm7sf4, Sema4d, Rbbp7, Psmd10, Cdkn1b, Map2k5, Ep300, Crlf3, Rtn4, Bcl2, Gng4, Smad4, Ppp1r9b, Gas1, Lef1, Apbb2, Islr2, Ntrk3, Adipor2, Fxn, Cyba, Ncoa3, Sema3a, B…
GO:0071103	DNA conformation change	0.01075 ( 36 of 3350 genes )	0.00373 ( 127 of 34011 annotated genes )	1.506e-09	7.051e-06	Ino80, Ercc3, Tspyl2, Prm2, Ctcf, Wrn, Recql, Top3b, Smc1a, Brd2, Top1, Mcm6, H2afz, Rsf1, Ascc3, Chd8, Ddx1, Ruvbl2, Npm1, Nat15, Mta2, Prm3, Hells, Hist3h2a, Acin1, Hjurp, Parp10, Hp1bp3, Nap1l4, Smc4, Rad50, Ncapg, Set, Top3a, Myst4, Mcm4,
GO:0050870	positive regulation of T	0.01015 ( 34 of 3350 genes )	0.00341 ( 116 of 34011 annotated genes )	1.631e-09	7.635e-06	Stat5b, Foxp3, Rara, Ccr7, Hsp90aa1, Spn, Hsph1, Cd5, Cd86, Lgals8, Cd3e, Lgals1, Il4ra, Il7r, Il12rb1, Il6st, Il2rg, Card11, Ap3b1, Cd47, Itpkb, Tgfbr2, Ikzf1, Cd27, Itgal, Hspd1, Cd4, Ccl5, Lck, Zap70, Coro1a, Malt1, Ptprc, Nckap1l,
GO:0006403	RNA localization	0.00836 ( 28 of 3350 genes )	0.00247 ( 84 of 34011 annotated genes )	1.787e-09	8.367e-06	Snupn, Fmr1, Nup160, Bat1a, Stau1, Rps28, Nxf1, Thoc5, Nup155, Rpsa, Xpo1, Nup210, Ddx39, Hnrnpa1, Nup54, Qk, Srsf10, Npm1, Tmem48, Hnrnpa2b1, Nupl1, Xpo7, Hnrnpa3, Thoc1, Ranbp2, Eif5a, Pabpn1, Eny2,
GO:0051568	histone H3-K4 methylation	0.00478 ( 16 of 3350 genes )	0.00088 ( 30 of 34011 annotated genes )	1.817e-09	8.506e-06	Setd1a, Kdm1a, Mll5, Paxip1, Setd3, Bcor, Ogt, Ash2l, Mll1, Wbp7, Mll2, Rbbp5, Brca1, Dnmt3b, Dnmt1, Mll3,
GO:0050657	nucleic acid transport	0.00806 ( 27 of 3350 genes )	0.00232 ( 79 of 34011 annotated genes )	1.852e-09	8.668e-06	Snupn, Fmr1, Nup160, Bat1a, Rps28, Nxf1, Thoc5, Nup155, Rpsa, Xpo1, Nup210, Ddx39, Hnrnpa1, Nup54, Qk, Srsf10, Npm1, Tmem48, Hnrnpa2b1, Nupl1, Xpo7, Hnrnpa3, Thoc1, Ranbp2, Eif5a, Pabpn1, Eny2,
GO:0050658	RNA transport	0.00806 ( 27 of 3350 genes )	0.00232 ( 79 of 34011 annotated genes )	1.852e-09	8.668e-06	Snupn, Fmr1, Nup160, Bat1a, Rps28, Nxf1, Thoc5, Nup155, Rpsa, Xpo1, Nup210, Ddx39, Hnrnpa1, Nup54, Qk, Srsf10, Npm1, Tmem48, Hnrnpa2b1, Nupl1, Xpo7, Hnrnpa3, Thoc1, Ranbp2, Eif5a, Pabpn1, Eny2,
GO:0051236	establishment of RNA loca	0.00806 ( 27 of 3350 genes )	0.00232 ( 79 of 34011 annotated genes )	1.852e-09	8.668e-06	Snupn, Fmr1, Nup160, Bat1a, Rps28, Nxf1, Thoc5, Nup155, Rpsa, Xpo1, Nup210, Ddx39, Hnrnpa1, Nup54, Qk, Srsf10, Npm1, Tmem48, Hnrnpa2b1, Nupl1, Xpo7, Hnrnpa3, Thoc1, Ranbp2, Eif5a, Pabpn1, Eny2,
GO:0048812	neuron projection morphog	0.02239 ( 75 of 3350 genes )	0.01132 ( 385 of 34011 annotated genes )	1.901e-09	8.898e-06	Mycbp2, Actb, Psen1, Dlg4, Ywhah, Bcl11b, Anapc2, B3gnt2, Spg20, 2400003C14Rik, Atg7, Dab1, Sipa1l1, Nfasc, Gpm6a, Apc, Stxbp1, Rtn4rl1, Rtn4, Bcl2, Evl, Picalm, Lrrk2, Ntrk3, Fxn, Sema3a, Barhl2, Rufy3, Egr2, Vasp, Creb1, Ssh1, Igf1r, Gsk3b, Ssh2, Foxp1, Tctn1, Nrcam, Vim, Arhgap4, Fgfr2, Ilk, Ngef, Tnik, Kidins220, Numb, Pten, Trpv2, Ndel1, Actr3, Pafah1b1, Rpl24, Cdh4, Notch1, Runx3, Sema4d, C…
GO:0002573	myeloid leukocyte differe	0.01075 ( 36 of 3350 genes )	0.00376 ( 128 of 34011 annotated genes )	1.904e-09	8.913e-06	Inpp5d, Casp8, Il25, Sp3, Rara, Chuk, Psen1, Gnas, Thoc5, Ndfip1, Id2, Tesc, Mll5, Tgfb1, Notch2, Med1, Clec2i, Tm7sf4, Vegfa, Tob2, Apc, Pik3r1, Clec2d, Tfrc, Tgfbr2, Ikzf1, Kdm1a, Lef1, Runx1, Itgb3, Ccl5, Lif, Nme2, Csf2, Ogt, Mapk14,
GO:0035023	regulation of Rho protein	0.01134 ( 38 of 3350 genes )	0.00412 ( 140 of 34011 annotated genes )	2.067e-09	9.678e-06	Myo9b, Arhgef3, Arhgap15, Gsk3b, Als2cl, Arfgef1, Arhgap4, Ccr7, Abr, Ngef, Arhgef18, Kctd13, Prex1, Ccl11, Ttn, Obscn, Ndel1, Pafah1b1, Bves, Spata13, Bcr, Vav1, Sema4d, Rictor, Itsn1, Pip5k1a, Arhgap1, Epha5, Scrib, Ralbp1, Trio, Arhgef1, Gmip, Rap1gds1, Cul3, Plekhg2, Nckap1l, Arhgef10l,
GO:0000003	reproduction	0.04119 ( 138 of 3350 genes )	0.02567 ( 873 of 34011 annotated genes )	2.344e-09	1.097e-05	Usf2, Stat5b, Sp3, Rara, Frzb, Wee2, Oas1d, Dnmt3a, Ube3a, Chd7, Bmp5, Rnf17, Adrbk1, Ubr2, Hbxip, Tcf7, Psap, Ppia, Apc, Nr2c2, Tap1, Prkdc, Nipbl, Rps6, Hcfc1, Krt9, Bcl2, Park7, Hdac1, Mtap7, Npy5r, Ggnbp2, Agpat6, Ccl5, Lif, Ifnb1, Reck, Rad23b, Theg, Pgm3, Creb1, Clgn, Igf1r, Chuk, Gsr, Etf1, Txnrd3, Sod1, 4932438A13Rik, Arrb2, Pten, Apob, Tgfb1, Sox17, Bat3, Pafah1b1, Ggn, Bax, Tardbp, Cr1l…
GO:0060341	regulation of cellular lo	0.02985 ( 100 of 3350 genes )	0.01685 ( 573 of 34011 annotated genes )	2.363e-09	1.106e-05	Uaca, Rims4, Gabbr1, Pram1, Exoc2, Uhmk1, Prkcb, Plcd1, Appl1, Vamp4, Pfn2, Cherp, Npy2r, Ccr7, Adora3, Gnb2l1, Hsp90aa1, Rapgef4, Chd7, A930001N09Rik, Adrbk1, Pde3b, Use1, Scfd1, Ncs1, Hsp90ab1, Flna, Dpysl2, Psmd10, Apc, Csk, Dnm1l, Ppp3ca, Pde2a, Stxbp1, Hmgcr, Rtn4, Tmem173, Smad4, Kiss1r, Pycard, Dhrs7c, Ubr5, Npy5r, Lcp1, Il10, Lif, Hmgn3, Mgea5, Stxbp3a, Psmd9, Rab9, Tlr2, Irf3, Creb1, Rph…
GO:0048589	developmental growth	0.01731 ( 58 of 3350 genes )	0.00788 ( 268 of 34011 annotated genes )	2.379e-09	1.114e-05	Mustn1, Rara, Foxp1, Stra6, Psen1, Pax7, Fgfr2, Anapc2, Arhgap4, Spg20, Ilk, 2400003C14Rik, Ube3a, Pten, Ccl11, Trpv2, Tgfb1, Smad2, Ndel1, Med12, Pafah1b1, Notch1, Alkbh1, Cdh4, Med1, Lrp6, Ptk7, Sema4d, Psap, Gins1, C3, Ep300, Nipbl, Gpx1, Tgfbr2, Rtn4, Brd4, Bcl2, Smad4, Sbds, Dlg1, Gas1, Ddr2, Rbpj, Trim28, Islr2, Tcfap2c, Ntrk3, Fxn, Ncoa3, Sema3a, Barhl2, Mll2, Hbegf, Por, Sall4, Chrnd, Int…
GO:0034220	ion transmembrane transpo	0.02597 ( 87 of 3350 genes )	0.01397 ( 475 of 34011 annotated genes )	2.418e-09	1.132e-05	Hrh1, Trpm4, Atp2a1, Trpm5, Slc22a18, Psen1, Kcnh1, Gpr89, Nalcn, Trpm6, Slc30a2, Slc23a1, Nipa1, Atp6v0e, Atp2a2, Slc17a7, Ano2, Atp5b, Tesc, Clcn1, Htr3b, Trim27, Uqcr11, Cacna2d2, Tpcn1, Gpm6a, Slc7a3, Stim1, Clca6, Atp5h, Atp1a1, Ttyh3, Atp5e, Atp6v1g1, Ahcyl1, Itpr1, Itpr2, Kcnj12, Crbn, Kcnq2, Hcn1, Chrnd, Vdac1, Kcnh8, Slco6c1, Cox6c, Clic1, Ryr3, Slc30a1, Slc12a6, Atp6v0a2, Atp2b1, Trpv2,…
GO:0033077	T cell differentiation in	0.00746 ( 25 of 3350 genes )	0.00206 ( 70 of 34011 annotated genes )	2.575e-09	1.205e-05	Stat5b, B2m, Foxp3, Zeb1, Clptm1, Prkdc, Rps6, Nfkbid, Adam17, Itpkb, Bcl11b, Lig4, Ccr7, Bcl2, Spn, Dock2, Cd3e, Rag1, Zap70, Ptprc, Il7r, Trp53, Il2rg, Card11, Apc,
GO:0008154	actin polymerization or d	0.00925 ( 31 of 3350 genes )	0.00300 ( 102 of 34011 annotated genes )	3.198e-09	1.497e-05	Cfl1, Tmsb10, Pfn1, Vasp, Ssh1, Wasl, Ssh2, Lats1, Spnb2, Capza1, Pfn2, Arfgef1, Evl, Rasa1, Dlg1, Prex1, Rdx, Prkcd, Ccl11, Diap1, Capzb, Actr3, Coro1a, Add1, Nckap1l, Clec2i, Arpc4, Tmod3, Tpm1, Spna2, Rictor,
GO:0002696	positive regulation of le	0.01343 ( 45 of 3350 genes )	0.00544 ( 185 of 34011 annotated genes )	3.284e-09	1.537e-05	Stat5b, Pcid2, Inpp5d, Foxp3, Rara, Adora3, Ccr7, Hsp90aa1, Spn, Hsph1, Cd5, Cd86, Lgals8, Tgfb1, Cd3e, Clcf1, Lgals1, Il4ra, Stat6, Il7r, Il12rb1, Il6st, Il2rg, Card11, Nfatc2, Ap3b1, Cd47, Itpkb, Tgfbr2, Bcl2, Ikzf1, Cd27, Mif, Paxip1, Itgal, Hspd1, Cd4, Ccl5, Lck, Zap70, Coro1a, Il15ra, Malt1, Ptprc, Nckap1l,
GO:0045596	negative regulation of ce	0.02358 ( 79 of 3350 genes )	0.01235 ( 420 of 34011 annotated genes )	3.779e-09	1.769e-05	Stat5b, Med14, Rara, Frzb, Psen1, Nfkbid, Ywhah, Smc1a, Wee2, Spg20, Id2, Ctnna1, Dab1, Mbnl3, Lrp6, Clec2i, Tspo, Trp53, Ankrd17, Apc, Pik3r1, Zhx2, Nipbl, Tcf7l1, Calr, Rtn4, Ctla4, Stag2, Lrrk2, Runx1, Rbpj, Itgb3, Tcfap2c, Ntrk3, Lif, Paf1, Sema3a, Ifnb1, Rufy3, Inpp5d, Trib2, Med15, Ldb1, Ncor2, Zeb1, Gsk3b, Cdc73, Smc3, Arhgap4, Crebbp, Thoc5, Hdac4, Pten, Ybx1, Tgfb1, Sox17, Med12, Il4ra, …
GO:0033044	regulation of chromosome	0.00866 ( 29 of 3350 genes )	0.00271 ( 92 of 34011 annotated genes )	4.005e-09	1.875e-05	Terf1, Smc5, Kdm3a, Foxp3, Ctcf, Parp10, Nipbl, Brd7, Srebf1, Wbp7, Ube2b, Dnmt1, Kdm1a, Tinf2, Jarid2, Tgfb1, Paxip1, Ncor1, Senp6, Bcor, Pif1, Mll1, Nsmce2, Ogt, Tlk1, Rnf4, Trp53, Dnmt3b, Brca1,
GO:0000910	cytokinesis	0.00806 ( 27 of 3350 genes )	0.00241 ( 82 of 34011 annotated genes )	4.698e-09	2.199e-05	Myh10, Kif20a, Cfl1, Igf1r, Rab11fip3, Vps24, Spnb2, Birc6, Dctn3, Spg20, Myh9, Prpf40a, Usp8, Stambp, Son, Pkn2, Actr2, Pstpip1, Calm1, Actr3, Cul3, Rock1, Anln, Racgap1, Cetn2, Rock2, Apc,
GO:0042098	T cell proliferation	0.01075 ( 36 of 3350 genes )	0.00388 ( 132 of 34011 annotated genes )	4.72e-09	2.21e-05	Stat5b, Itgb2, Psmb10, Satb1, Foxp3, Ccr7, Ndfip1, Spn, Ptpn6, Cd86, Tgfb1, Cd3e, Bax, Clec2i, Il12rb1, Trp53, Il6st, Tnfrsf14, Card11, Fyn, Cblb, Fkbp1a, Rps6, Ctla4, Dock2, Dlg1, Itgal, Ccl5, Zap70, Coro1a, Malt1, Il20rb, Ptprc, Nckap1l, Zbtb32, Elf4,
GO:0005975	carbohydrate metabolic pr	0.02955 ( 99 of 3350 genes )	0.01685 ( 573 of 34011 annotated genes )	4.851e-09	2.271e-05	B3galnt2, Pcdh12, Prkaa1, Mgat4a, Stt3b, Plcd1, Fabp5, Taldo1, Psen1, Hsd11b1, B3gnt2, St6gal2, Ldha, Gpi1, Gba, Ugp2, Galnt1, St8sia1, Rpn2, Il6st, Gnptab, Akr1b3, Mdp1, Man2a1, Mdh2, Man2a2, Akt2, Pik3r1, Uggt1, Ppp1cb, Ogdh, Man2b1, Ppp1ca, Pdk1, G6pc3, Cds2, Ppp1r3b, Inpp4b, St3gal1, Stt3a, Oas2, Mgea5, Pgam1, Cs, B4galt6, Mat2b, Arpp19, Cmah, Pgm3, Gsk3b, Arfgef1, Entpd5, Foxo1, Glt25d1, Npc…
GO:0033365	protein localization to o	0.02060 ( 69 of 3350 genes )	0.01029 ( 350 of 34011 annotated genes )	4.983e-09	2.333e-05	Uaca, Cfl1, Cherp, Hsp90aa1, Scarb2, Tomm20, Hsp90ab1, Flna, Trp53, Psmd10, Morc3, Mff, Ppp3ca, Pik3r1, Pikfyve, Pde2a, Calr, Oprd1, l7Rn6, Tmem173, Smad4, Banp, Fbn2, Ubr5, Kpnb1, Diap1, Hspa4, Samm50, Snupn, Tmem188, Tlr2, Arntl, Gsk3b, Rab7, Lrwd1, Ogg1, Spnb2, Tnpo3, Rab8b, Macf1, Nup155, Xpo1, Nop58, Rad21, Bat3, Tgfb1, Rpl11, Cer1, Bax, Creb3, Os9, Med1, Kpna6, Ap3b1, Syne1, Ep300, Pola2, E…
GO:0050867	positive regulation of ce	0.01373 ( 46 of 3350 genes )	0.00570 ( 194 of 34011 annotated genes )	5.263e-09	2.464e-05	Stat5b, Pcid2, Inpp5d, Foxp3, Rara, Adora3, Ccr7, Hsp90aa1, Spn, Hsph1, Cd5, Cd86, Lgals8, Tgfb1, Cd3e, Clcf1, Lgals1, Il4ra, Stat6, Il7r, Il12rb1, Il6st, Il2rg, Card11, Nfatc2, Ap3b1, Cd47, Itpkb, Tgfbr2, Bcl2, Ikzf1, Cd27, Mif, Paxip1, Itgal, Hspd1, Cd4, Ccl5, Lck, Zap70, Coro1a, Il15ra, Malt1, Ptprc, Rps6ka1, Nckap1l,
GO:0051146	striated muscle cell diff	0.01373 ( 46 of 3350 genes )	0.00570 ( 194 of 34011 annotated genes )	5.263e-09	2.464e-05	Rara, Gsk3b, Foxp1, Chuk, Cav2, Fgfr2, Ilk, Hdac4, Bnip2, Ybx1, Igfbp3, Ttn, Tgfb1, Casp1, Atg7, Capn2, Epc1, Spag9, Cacna2d2, Actg1, Myog, Notch1, Neo1, Mbnl3, Pitx2, Vegfa, Myh10, Ppp3ca, Pik3r1, Homer1, Ep300, Gpx1, Utrn, Afg3l2, Bcl2, Myh9, Ezh2, Col4a1, Lrrk2, Lef1, Dicer1, Sik1, Acadm, Tnnt2, Mapk14, Tpm1,
GO:0006816	calcium ion transport	0.01612 ( 54 of 3350 genes )	0.00726 ( 247 of 34011 annotated genes )	5.731e-09	2.683e-05	Hrh1, Vdac1, Trpm4, Prkcb, Atp2a1, Psen1, Anxa6, Cherp, Trpm6, Ryr3, Atp2a2, Slc30a1, Arrb2, Atp2b1, Trpv2, Tgfb1, Trim27, Nfatc1, Cacna1c, Cacna2d2, Tpcn1, Plcg1, Gpm6a, Bax, Creb3, Adcyap1r1, Tspo, Stim1, Tmem66, Trpc2, Ppp3ca, Homer1, Cacna1a, Atp2c1, Calcrl, Fkbp1a, P2rx4, Camk2d, Bcl2, Trpm7, Dhrs7c, Itpr1, Diap1, Itpr2, Ccl5, Lck, Sri, Coro1a, Sestd1, Ptprc, Cacna1g, Mgea5, Dbi, Kcnn4,
GO:0022414	reproductive process	0.04060 ( 136 of 3350 genes )	0.02555 ( 869 of 34011 annotated genes )	5.81e-09	2.72e-05	Usf2, Stat5b, Sp3, Rara, Frzb, Wee2, Oas1d, Dnmt3a, Ube3a, Chd7, Bmp5, Rnf17, Adrbk1, Ubr2, Hbxip, Tcf7, Psap, Ppia, Apc, Nr2c2, Tap1, Prkdc, Nipbl, Rps6, Hcfc1, Krt9, Bcl2, Park7, Hdac1, Mtap7, Npy5r, Ggnbp2, Agpat6, Ccl5, Lif, Ifnb1, Reck, Rad23b, Theg, Pgm3, Creb1, Clgn, Igf1r, Chuk, Gsr, Etf1, Txnrd3, Sod1, 4932438A13Rik, Arrb2, Pten, Apob, Tgfb1, Sox17, Bat3, Pafah1b1, Ggn, Bax, Tardbp, Cr1l…
GO:0070838	divalent metal ion transp	0.01791 ( 60 of 3350 genes )	0.00847 ( 288 of 34011 annotated genes )	5.835e-09	2.732e-05	Hrh1, Vdac1, Trpm4, Prkcb, Atp2a1, Psen1, Anxa6, Cherp, Trpm6, Slc30a2, Ryr3, Nipa1, Atp2a2, Slc30a1, Arrb2, Atp2b1, Trpv2, Tgfb1, Trim27, Nfatc1, Cacna1c, Zdhhc17, Cacna2d2, Tpcn1, Plcg1, Gpm6a, Bax, Creb3, Adcyap1r1, Tspo, Stim1, Slc30a9, Tmem66, Trpc2, Magt1, Ppp3ca, Ap3b1, Homer1, Cacna1a, Atp2c1, Calcrl, Fkbp1a, P2rx4, Camk2d, Bcl2, Trpm7, Dhrs7c, Itpr1, Diap1, Itpr2, Ccl5, Lck, Sri, Coro1a,…
GO:0008064	regulation of actin polym	0.00836 ( 28 of 3350 genes )	0.00259 ( 88 of 34011 annotated genes )	5.839e-09	2.733e-05	Cfl1, Tmsb10, Pfn1, Ssh1, Wasl, Ssh2, Lats1, Spnb2, Capza1, Pfn2, Arfgef1, Evl, Rasa1, Dlg1, Prex1, Rdx, Prkcd, Ccl11, Capzb, Actr3, Coro1a, Add1, Nckap1l, Clec2i, Tmod3, Tpm1, Spna2, Rictor,
GO:0050770	regulation of axonogenesi	0.00896 ( 30 of 3350 genes )	0.00291 ( 99 of 34011 annotated genes )	6.157e-09	2.882e-05	Ssh1, Cacna1a, Ssh2, Ep300, Psen1, Vim, Anapc2, Arhgap4, Rtn4, Spg20, Ilk, 2400003C14Rik, Mif, Mark2, Pten, Trpv2, Lrrc4c, Ndel1, Islr2, Pafah1b1, Dab1, Fxn, Ntrk3, Sipa1l1, Sema3a, Barhl2, Cdh4, Stk24, Sema4d, Rufy3,
GO:0007167	enzyme linked receptor pr	0.03015 ( 101 of 3350 genes )	0.01741 ( 592 of 34011 annotated genes )	6.703e-09	3.138e-05	Stat5b, Hspa5, Prkcb, Strap, Mapkapk2, Atxn7, Smad7, Psen1, Skor1, Cav2, Adam17, Spg20, Rgma, Gigyf1, Prkd2, Lat, Fos, Bmp5, Ppp2r5d, Eif4ebp1, Sipa1l1, Rgs14, Flna, Clec2i, Trp53, Il6st, Akap4, Akt2, Pik3r1, Stub1, Frs2, Tgfbr2, Smad4, Fbn2, Rbpj, Wdr19, Rapgef1, Ntrk3, Lif, Dlg2, Stap1, Hbegf, Cilp, Rnf111, Rela, Raf1, Creb1, Igf1r, Zeb1, Rab7, Spnb2, Fgfr2, Foxo1, Ilk, Ngef, Ptpra, Arrb2, Kcp,…
GO:0006629	lipid metabolic process	0.04328 ( 145 of 3350 genes )	0.02779 ( 945 of 34011 annotated genes )	6.828e-09	3.196e-05	Stat5b, Hrh1, Plcd1, Nsdhl, Ywhah, Hsd11b1, Dgkd, Bcl11b, Pld3, Agps, Bmp5, Sgpp2, Pde3b, Lta4h, Pigs, Tspo, Psap, Cdipt, Akt2, Stub1, Hmgcr, Alox5, Plcb2, Retsat, Smg1, Mtap7, Inpp4b, Agpat6, Adipor2, Inpp5d, Tmem188, Creb1, Igf1r, Dkk3, Hdlbp, Acap1, Cyp4v3, Etnk1, Sod1, 4932438A13Rik, Sftpb, Prkcd, Pten, Cd81, Apob, Tgfb1, Scd1, Atp5a1, Pafah1b1, Bax, Sptlc1, Brca1, Prkab1, Pip5k1a, Lpcat4, Ha…
GO:0051099	positive regulation of bi	0.01493 ( 50 of 3350 genes )	0.00653 ( 222 of 34011 annotated genes )	7.35e-09	3.441e-05	Rhebl1, Itgb2, Tlr2, Rela, Prkcb, Rara, Gsk3b, Irak2, Prdx3, Crebbp, Krit1, Hipk1, Eno1, Mtpn, Pten, Hdac4, Prkd2, Tgfb1, Ikbkb, Crtc3, Npm1, Add1, Lrp6, Hsp90ab1, Pitx2, Vegfa, Sp100, Card11, Prkch, Ep300, Ube2v1, Rnf31, Fkbp1a, Epha5, Ripk1, Brd4, Tmem173, Pycard, Psma6, Kdm1a, Epb4.1, Ddr2, Calm1, Il10, Hspa4, Hmgn3, Malt1, Neurod1, Crbn, Ncoa3,
GO:0048666	neuron development	0.03194 ( 107 of 3350 genes )	0.01882 ( 640 of 34011 annotated genes )	7.443e-09	3.484e-05	Mycbp2, Tug1, Uhmk1, Actb, Psen1, Dlg4, Ywhah, Bcl11b, Anapc2, B3gnt2, Spg20, 2400003C14Rik, Sez6, Rapgef4, Atg7, Lgals1, Dab1, Ppp2r5d, Sipa1l1, Nfasc, Gpm6a, Ncs1, Ptk7, Apc, Stxbp1, Rtn4rl1, Rtn4, Klk6, Bcl2, Evl, Picalm, Ppp1r9b, Lrrk2, Stx3, Runx1, Lama1, Diap1, Ntrk3, Lif, Fxn, Dlg2, Sema3a, Barhl2, Hcn1, Fig4, Rufy3, Egr2, Vasp, Ssh1, Creb1, Igf1r, Gsk3b, Ssh2, Foxp1, Tctn1, Nrcam, Vim, Ar…
GO:0001568	blood vessel development	0.02537 ( 85 of 3350 genes )	0.01385 ( 471 of 34011 annotated genes )	7.52e-09	3.52e-05	Bai2, Prkcb, Plcd1, Pnpla6, Ets1, Smad7, Psen1, Nsdhl, Krit1, Egln1, Atp5b, Gpi1, Setd2, Prkd2, Chd7, Plcg1, Pde3b, Rock1, Pitx2, Ankrd17, Ubp1, Vezf1, Nfatc3, Gna13, Lox, Calcrl, Gpx1, Stat1, Tgfbr2, Rtn4, Runx1, Lama1, Erap1, Rbpj, Paxip1, Ddah1, Itgb3, Ccl5, Rapgef1, Lif, Hbegf, Reck, Wasf2, Itgb2, Arhgap24, Casp8, Stra6, Fgfr2, Foxo1, Gja5, Nr4a1, Pbrm1, Stk4, Rasa1, Ccl11, Pten, Apob, Sox17,…
GO:0030832	regulation of actin filam	0.00836 ( 28 of 3350 genes )	0.00262 ( 89 of 34011 annotated genes )	7.745e-09	3.626e-05	Cfl1, Tmsb10, Pfn1, Ssh1, Wasl, Ssh2, Lats1, Spnb2, Capza1, Pfn2, Arfgef1, Evl, Rasa1, Dlg1, Prex1, Rdx, Prkcd, Ccl11, Capzb, Actr3, Coro1a, Add1, Nckap1l, Clec2i, Tmod3, Tpm1, Spna2, Rictor,
GO:0032970	regulation of actin filam	0.01224 ( 41 of 3350 genes )	0.00485 ( 165 of 34011 annotated genes )	8.312e-09	3.891e-05	Cfl1, Tmsb10, Phpt1, Ssh1, Wasl, Ssh2, Lats1, Spnb2, Capza1, Pfn2, Arfgef1, Ilk, Rasa1, Prex1, Prkcd, Ccl11, Tnnc1, Capzb, Actr3, Rock1, Add1, Clec2i, Rictor, Pfn1, S1pr1, Ep300, Epha5, Kiss1r, Cnn2, Evl, Dlg1, Rdx, Lrp1, Coro1a, Tnnt2, Nckap1l, Fhod1, Tmod3, Tpm1, Arhgef10l, Spna2,
GO:0007409	axonogenesis	0.01910 ( 64 of 3350 genes )	0.00938 ( 319 of 34011 annotated genes )	8.726e-09	4.085e-05	Mycbp2, Actb, Psen1, Bcl11b, Anapc2, B3gnt2, Spg20, 2400003C14Rik, Atg7, Dab1, Sipa1l1, Nfasc, Apc, Stxbp1, Rtn4rl1, Rtn4, Bcl2, Evl, Picalm, Ntrk3, Fxn, Sema3a, Barhl2, Rufy3, Egr2, Creb1, Ssh1, Vasp, Igf1r, Gsk3b, Foxp1, Ssh2, Nrcam, Tctn1, Arhgap4, Fgfr2, Vim, Ilk, Numb, Pten, Ndel1, Trpv2, Pafah1b1, Rpl24, Cdh4, Notch1, Runx3, Sema4d, Celsr3, Myh10, Cacna1a, Ep300, Hoxa1, Epha5, Afg3l2, Mark2…
GO:0072511	divalent inorganic cation	0.01791 ( 60 of 3350 genes )	0.00856 ( 291 of 34011 annotated genes )	8.755e-09	4.098e-05	Hrh1, Vdac1, Trpm4, Prkcb, Atp2a1, Psen1, Anxa6, Cherp, Trpm6, Slc30a2, Ryr3, Nipa1, Atp2a2, Slc30a1, Arrb2, Atp2b1, Trpv2, Tgfb1, Trim27, Nfatc1, Cacna1c, Zdhhc17, Cacna2d2, Tpcn1, Plcg1, Gpm6a, Bax, Creb3, Adcyap1r1, Tspo, Stim1, Slc30a9, Tmem66, Trpc2, Magt1, Ppp3ca, Ap3b1, Homer1, Cacna1a, Atp2c1, Calcrl, Fkbp1a, P2rx4, Camk2d, Bcl2, Trpm7, Dhrs7c, Itpr1, Diap1, Itpr2, Ccl5, Lck, Sri, Coro1a,…
GO:0060537	muscle tissue development	0.01821 ( 61 of 3350 genes )	0.00876 ( 298 of 34011 annotated genes )	8.797e-09	4.118e-05	Rara, Foxp1, Stra6, Smad7, Pax7, Cav2, Fgfr2, Ilk, Egln1, Tshz3, Pten, Hdac4, Tnnc1, Igfbp3, Ttn, Tgfb1, Sox17, Atg7, Cacna2d2, Myog, Notch1, Med1, Mbnl3, Lrp6, Pitx2, Vegfa, Myh10, Ppp3ca, Pik3r1, Homer1, Mbnl1, Ep300, Fkbp1a, Gpx1, Hmgcr, Utrn, Tgfbr2, Afg3l2, Foxp2, Ly6e, Bcl2, Csda, Psma6, Dlg1, Myl6, Col4a1, Lrrk2, Lef1, Rbpj, Dicer1, Sik1, Sin3b, Acadm, Tnnt2, Tiparp, Luc7l, Usp19, Mapk14, …
GO:0045580	regulation of T cell diff	0.00776 ( 26 of 3350 genes )	0.00232 ( 79 of 34011 annotated genes )	9.113e-09	4.266e-05	Stat5b, Foxp3, Ap3b1, Zeb1, Rara, Clptm1, Nfkbid, Itpkb, Tgfbr2, Ccr7, Ctla4, Hsp90aa1, Ikzf1, Cd27, Zbtb7b, Lck, Il4ra, Zap70, Ptprc, Ctla2a, Nckap1l, Ifnb1, Il7r, Il2rg, Card11, H2-Oa,
GO:0016579	protein deubiquitination	0.00687 ( 23 of 3350 genes )	0.00188 ( 64 of 34011 annotated genes )	9.639e-09	4.512e-05	Uimc1, Usp22, Otud5, Kat2a, Atxn7, Usp28, Brcc3, Usp47, Usp3, Zranb1, Usp8, Stambp, Usp37, Usp4, Mysm1, Trim21, Usp20, Usp19, Cyld, Usp26, Usp7, Usp9x, Eny2,
GO:0030041	actin filament polymeriza	0.00806 ( 27 of 3350 genes )	0.00250 ( 85 of 34011 annotated genes )	1.131e-08	5.292e-05	Tmsb10, Pfn1, Wasl, Lats1, Spnb2, Capza1, Pfn2, Arfgef1, Evl, Rasa1, Dlg1, Prex1, Rdx, Prkcd, Ccl11, Diap1, Capzb, Actr3, Coro1a, Add1, Nckap1l, Clec2i, Arpc4, Tmod3, Tpm1, Spna2, Rictor,
GO:0018209	peptidyl-serine modificat	0.01075 ( 36 of 3350 genes )	0.00403 ( 137 of 34011 annotated genes )	1.379e-08	6.455e-05	Raf1, Uhmk1, Mapkapk2, Gsk3b, Lats1, Clk1, Smad7, Ilk, Stk4, Prkd2, Tgfb1, Galnt1, Adrbk1, Bax, Pak2, Vegfa, Morc3, Akt2, Prkdc, Prss34, Camk2d, Tgfbr2, Map4k1, Bcl2, Araf, Hk1, Mif, Lrrk2, Smg1, Braf, Taf1, Lif, Phip, Nlk, Mapk14, Galnt3,
GO:0048514	blood vessel morphogenesi	0.02269 ( 76 of 3350 genes )	0.01205 ( 410 of 34011 annotated genes )	1.422e-08	6.659e-05	Bai2, Prkcb, Plcd1, Pnpla6, Ets1, Smad7, Krit1, Egln1, Atp5b, Gpi1, Setd2, Prkd2, Chd7, Plcg1, Pde3b, Rock1, Pitx2, Ubp1, Vezf1, Nfatc3, Gna13, Calcrl, Gpx1, Stat1, Tgfbr2, Rtn4, Runx1, Erap1, Lama1, Rbpj, Paxip1, Ddah1, Ccl5, Lif, Hbegf, Wasf2, Itgb2, Arhgap24, Casp8, Stra6, Fgfr2, Nr4a1, Pbrm1, Stk4, Rasa1, Ccl11, Pten, Apob, Sox17, Pknox1, Col8a2, Add1, Notch1, Med1, Vegfa, Foxo4, S1pr1, Map2k…
GO:0001817	regulation of cytokine pr	0.01970 ( 66 of 3350 genes )	0.00994 ( 338 of 34011 annotated genes )	1.572e-08	7.356e-05	Stat5b, Zc3hav1, Trpm4, Rara, Mapkapk2, Adam17, Ccr7, Spn, Gba, Prkd2, Hsf1, Trim27, Il12rb1, Clec2i, Tspo, Nfkb1, Csk, Ubash3a, Il17ra, Smad4, H2-Q1, Pycard, Arnt, Cd27, Ifnar1, Ccl5, Il10, Trim30a, Il20rb, Nckap1l, Zbtb32, Tbk1, Inpp5d, Trib2, Irf3, Rela, Tlr2, Creb1, Foxp3, Iqgap1, Polr3a, Ndfip1, Sod1, Arrb2, Cd3e, Casp1, Tgfb1, Sigirr, Il4ra, Polr3f, Card11, Map2k5, C3, Zcchc11, Arfgef2, Rip…
GO:0007249	I-kappaB kinase/NF-kappaB	0.01224 ( 41 of 3350 genes )	0.00497 ( 169 of 34011 annotated genes )	1.74e-08	8.146e-05	Tlr2, Rela, Irf3, Zc3hav1, Prkcb, Erc1, Chuk, Nfkbid, Slc20a1, Ndfip1, Shisa5, Ikbkb, Sqstm1, S100a13, Lgals1, Pdpk1, Zdhhc17, Rhoh, Flna, Psmd10, Card11, Snip1, Ppm1a, Atp2c1, Pdcd11, Ube2v1, Fkbp1a, Rnf31, Zmynd11, Stat1, Ikbke, Slc44a2, Bst2, Lgals9, Nlrc3, Eef1d, Mier1, Rel, BC031181, Malt1, Map3k14,
GO:0070925	organelle assembly	0.00836 ( 28 of 3350 genes )	0.00271 ( 92 of 34011 annotated genes )	1.755e-08	8.213e-05	Ino80, Chek2, Haus4, Rps2, Ctsd, Eftud1, Rps6, Psen1, Rps25, Wee2, Atg13, Cltc, Csnk1d, Rpsa, Atg16l1, Sbds, Cep192, Rcc1, Dicer1, Ncor1, Senp6, Rpl24, Coro1a, Rps14, Rnf4, Flna, Rps17, Racgap1,
GO:0007569	cell aging	0.00627 ( 21 of 3350 genes )	0.00165 ( 56 of 34011 annotated genes )	1.757e-08	8.227e-05	Terf1, Smc5, Wrn, Calr, Mnt, Bcl2, Id2, Ilk, Pdcd4, Sod1, Mif, Prkcd, Pten, Zfp217, Smc6, Npm1, Nsmce2, Xrn1, Trp53, Mapk14, Morc3,
GO:2000145	regulation of cell motili	0.02179 ( 73 of 3350 genes )	0.01147 ( 390 of 34011 annotated genes )	1.792e-08	8.391e-05	Phpt1, Ets1, Adam17, Ccr7, Adora3, Krit1, Gnb2l1, Prkd2, Rapgef4, Pecam1, Spag9, Rnf20, Spata13, Plcg1, Ptp4a1, Trp53, Pitx2, Il6st, Apc, Sell, Akt2, Pik3r1, Gna13, Pkn1, Msn, Tgfbr2, Rtn4, Rnf41, Bcl2, Kiss1r, Diap1, Lama1, 1810046J19Rik, Ccl5, Itgb3, Coro1a, Ptprc, Sema3a, Nckap1l, Rap2c, Hbegf, Tlr2, Igf1r, Arhgap4, Abr, Macf1, Map2k2, Ilk, Pkn2, Ccl11, Pten, Igfbp3, Tgfb1, Pdpk1, Creb3, Amotl…
GO:0031400	negative regulation of pr	0.01075 ( 36 of 3350 genes )	0.00409 ( 139 of 34011 annotated genes )	2.079e-08	9.731e-05	Kdm3a, Foxp3, Ubxn1, Igbp1, Smad7, Psen1, Ube2b, Ptpn6, Prkcd, Arrb2, Hmg20b, Pten, Igfbp3, Tgfb1, Usp4, Trim21, Bax, Dnajc10, Lrp6, Brca1, Sema4d, Fkbp1a, Ywhae, Dnmt1, Kdm1a, Jarid2, Tinf2, Bcor, Acer2, Hspa4, Ptprc, Mgea5, Impact, Dnmt3b, Mad2l1, Samsn1,
GO:0040012	regulation of locomotion	0.02299 ( 77 of 3350 genes )	0.01238 ( 421 of 34011 annotated genes )	2.082e-08	9.745e-05	Phpt1, Ets1, Adam17, Ccl21a, Ccr7, Adora3, Krit1, Gnb2l1, Prkd2, Rapgef4, Pecam1, Bves, Spag9, Rnf20, Spata13, Plcg1, Ptp4a1, Trp53, Pitx2, Il6st, Apc, Sell, Akt2, Pik3r1, Gna13, Pkn1, Msn, Tgfbr2, Rtn4, Rnf41, Bcl2, Kiss1r, Lrrk2, Lama1, Diap1, 1810046J19Rik, Ccl5, Itgb3, Coro1a, Ptprc, Sema3a, Nckap1l, Rap2c, Hbegf, Tlr2, Igf1r, Arhgap4, Abr, Macf1, Map2k2, Ilk, Pkn2, Ccl11, Pten, Igfbp3, Tgfb1…
GO:0002683	negative regulation of im	0.01284 ( 43 of 3350 genes )	0.00538 ( 183 of 34011 annotated genes )	2.173e-08	0.0001017	Tyro3, Inpp5d, Phpt1, Irf3, Foxp3, Nfkbid, Pcbp2, Abr, Ndfip1, Ptpn22, Id2, Spn, Ptpn6, Cd86, Mill2, Arrb2, Tgfb1, Trim27, Il4ra, Pdpk1, Cr1l, Ppp3cb, Stat6, Il7r, Bcr, Tnfrsf14, Lax1, Psma1, Tap1, Cblb, Ubash3a, Clec2d, Gpx1, Ctla4, Dusp10, Dlg1, Il10, Psmb4, Trim30a, Ptprc, Il20rb, Ifnb1, Samsn1,
GO:0010562	positive regulation of ph	0.01761 ( 59 of 3350 genes )	0.00856 ( 291 of 34011 annotated genes )	2.197e-08	0.0001028	Vac14, Tmem188, Raf1, Igbp1, Gsk3b, Lats1, Psen1, Gnas, Adam17, Ccnd2, Gnb2l1, Csnk1d, Ilk, Rgma, Prkcd, Arrb2, Gba, Cd81, Hcls1, Tgfb1, Bmp5, Cd3e, Sqstm1, Pecam1, Clcf1, Pak2, Trp53, Il6st, Vegfa, Tnfrsf14, Sema4d, Rictor, Cd6, Itsn1, Akt2, Pik3r1, Ep300, Ghr, Ripk1, Bcl2, Araf, Smad4, Mif, Dvl3, Lrrk2, Rad50, Braf, Tnk2, Lck, Cd4, Ccl5, Itgb3, Phip, Lif, Csf2, Itga6, Nckap1l, Rap2c, Cspg4,
GO:0045937	positive regulation of ph	0.01761 ( 59 of 3350 genes )	0.00856 ( 291 of 34011 annotated genes )	2.197e-08	0.0001028	Vac14, Tmem188, Raf1, Igbp1, Gsk3b, Lats1, Psen1, Gnas, Adam17, Ccnd2, Gnb2l1, Csnk1d, Ilk, Rgma, Prkcd, Arrb2, Gba, Cd81, Hcls1, Tgfb1, Bmp5, Cd3e, Sqstm1, Pecam1, Clcf1, Pak2, Trp53, Il6st, Vegfa, Tnfrsf14, Sema4d, Rictor, Cd6, Itsn1, Akt2, Pik3r1, Ep300, Ghr, Ripk1, Bcl2, Araf, Smad4, Mif, Dvl3, Lrrk2, Rad50, Braf, Tnk2, Lck, Cd4, Ccl5, Itgb3, Phip, Lif, Csf2, Itga6, Nckap1l, Rap2c, Cspg4,
GO:0001525	angiogenesis	0.01940 ( 65 of 3350 genes )	0.00982 ( 334 of 34011 annotated genes )	2.301e-08	0.0001077	Itgb2, Bai2, Casp8, Arhgap24, Prkcb, Plcd1, Pnpla6, Ets1, Fgfr2, Krit1, Nr4a1, Stk4, Egln1, Atp5b, Gpi1, Setd2, Pten, Ccl11, Prkd2, Sox17, Pknox1, Plcg1, Pde3b, Rock1, Add1, Col8a2, Notch1, Med1, Pitx2, Vegfa, Ubp1, Vezf1, Nfatc3, Foxo4, S1pr1, Map2k5, C3, Gna13, Srpk2, Stab1, Calcrl, B4galt1, Gpx1, Stat1, Ncl, Tgfbr2, Rtn4, Pik3r6, Myh9, Col4a1, Runx1, Erap1, Lef1, Rbpj, Dicer1, Ddah1, Ccl5, Lif…
GO:0030833	regulation of actin filam	0.00746 ( 25 of 3350 genes )	0.00226 ( 77 of 34011 annotated genes )	2.382e-08	0.0001115	Tmsb10, Pfn1, Wasl, Lats1, Spnb2, Capza1, Pfn2, Arfgef1, Evl, Rasa1, Dlg1, Prex1, Rdx, Prkcd, Ccl11, Capzb, Actr3, Coro1a, Add1, Nckap1l, Clec2i, Tmod3, Tpm1, Spna2, Rictor,
GO:0045637	regulation of myeloid cel	0.01015 ( 34 of 3350 genes )	0.00376 ( 128 of 34011 annotated genes )	2.57e-08	0.0001203	Stat5b, Inpp5d, Ldb1, Rara, Ets1, Cdc73, Gnas, Thoc5, Ndfip1, Id2, Tesc, Rcor1, Mll5, Notch2, Clec2i, Tm7sf4, Tob2, Apc, Pik3r1, Clec2d, Rnf41, Leo1, Ikzf1, Kdm1a, Lef1, Runx1, Itgb3, Ccl5, Lif, Nme2, Ogt, Paf1, Nckap1l, Mapk14,
GO:0007517	muscle organ development	0.01731 ( 58 of 3350 genes )	0.00844 ( 287 of 34011 annotated genes )	3.248e-08	0.000152	Foxp1, Stra6, Smad7, Pax7, Cav2, Fgfr2, Cd164, Ilk, Egln1, Hdac4, Tnnc1, Igfbp3, Ttn, Tgfb1, Sox17, Mov10l1, Foxk1, Cacna2d2, Myog, Notch1, Med1, Mbnl3, Lrp6, Pitx2, Foxo4, Ppp3ca, Pik3r1, Homer1, Mbnl1, Ep300, Fkbp1a, Gpx1, Hmgcr, Utrn, Tgfbr2, Afg3l2, Foxp2, Ly6e, Bcl2, Csda, Psma6, Myl6, Col4a1, Lrrk2, Lef1, Rbpj, Sik1, Chkb, Tagln2, Sin3b, Lif, Tnnt2, Luc7l, Usp19, Mapk14, Tpm1, Megf10, Chrnd,
GO:0046631	alpha-beta T cell activat	0.00806 ( 27 of 3350 genes )	0.00262 ( 89 of 34011 annotated genes )	3.383e-08	0.0001584	Satb1, Foxp3, Ap3b1, Rara, Cblb, Itpkb, Bcl11b, Tgfbr2, Ccr7, Bcl2, Hsph1, Ikzf1, Dock2, Lef1, Ncor1, Cd3e, Zbtb7b, Il4ra, Zap70, Ptprc, Nckap1l, Stat6, Itk, Tnfrsf14, Tcf7, Il2rg, Elf4,
GO:0002474	antigen processing and pr	0.00358 ( 12 of 3350 genes )	0.00059 ( 20 of 34011 annotated genes )	3.415e-08	0.0001599	H2-D1, Tapbp, H2-Q2, H2-gs10, B2m, Bat3, H2-K1, Tap1, H2-Q6, Calr, H2-T23, H2-Q1,
GO:0031333	negative regulation of pr	0.00657 ( 22 of 3350 genes )	0.00185 ( 63 of 34011 annotated genes )	3.679e-08	0.0001722	Tmsb10, Ppm1a, Pfn1, Raf1, Gsk3b, Spnb2, Capza1, Pfn2, Mapre1, Arfgef1, Tbcd, Evl, Prkcd, Rdx, Capzb, Fkbp4, Eif4ebp1, Crbn, Add1, Tmod3, Tpm1, Spna2,
GO:0006952	defense response	0.03582 ( 120 of 3350 genes )	0.02246 ( 764 of 34011 annotated genes )	3.693e-08	0.0001729	Uaca, Tyro3, Stat5b, Zc3hav1, Il25, Mapkapk2, Nfkbid, Plaa, Npy2r, Ddx60, Ccr7, Adora3, Spn, Mmp7, Ptpn6, Map3k5, C8a, Tapbp, Ano6, Lat, Hsf1, Stk39, Ifi47, Cnpy3, Il12rb1, Itgb6, Gpx4, Masp2, Cd47, Pde2a, H2-K1, Tap1, Calcrl, Lsp1, Gpx1, Alox5, Nlrc5, Stat1, Bcl2, Bst2, Tmem173, Park7, Pycard, Pvr, Ifnar1, Rbpj, Npy5r, Psmb4, Il10, Ccl5, Trim30a, Map4k2, Cyba, Ptprc, Oas2, Il20rb, Ctla2a, Vdac3,…
GO:0014706	striated muscle tissue de	0.01701 ( 57 of 3350 genes )	0.00826 ( 281 of 34011 annotated genes )	3.708e-08	0.0001736	Rara, Foxp1, Smad7, Pax7, Cav2, Fgfr2, Ilk, Egln1, Pten, Hdac4, Tnnc1, Igfbp3, Ttn, Tgfb1, Sox17, Atg7, Cacna2d2, Myog, Notch1, Med1, Mbnl3, Lrp6, Pitx2, Vegfa, Myh10, Ppp3ca, Pik3r1, Homer1, Mbnl1, Ep300, Fkbp1a, Gpx1, Hmgcr, Utrn, Tgfbr2, Afg3l2, Foxp2, Ly6e, Bcl2, Csda, Psma6, Myl6, Col4a1, Lrrk2, Lef1, Rbpj, Dicer1, Sik1, Sin3b, Acadm, Tnnt2, Luc7l, Usp19, Mapk14, Tpm1, Chrnd, Megf10,
GO:0032880	regulation of protein loc	0.01910 ( 64 of 3350 genes )	0.00973 ( 331 of 34011 annotated genes )	3.788e-08	0.0001773	Uaca, Tlr2, Mycbp2, Irf3, Uhmk1, Rph3al, Foxp3, Gsk3b, Ogg1, Lats1, Appl1, Vamp4, Cherp, Ralgapa2, Ccr7, Ndfip1, Gnb2l1, Hsp90aa1, Xpo1, Cep192, Tgfb1, Casp1, 6720463M24Rik, A930001N09Rik, Il4ra, Pdpk1, Creb3, Rab14, Med1, Hsp90ab1, Flna, Psmd10, Exoc4, Apc, Csk, Dnm1l, Nedd1, Pde2a, Arhgdia, Ep300, Emd, Bcl2, Gapvd1, Tmem173, Smad4, Pycard, Dnajc1, Mif, Ubr5, Picalm, Dlg1, Rbm22, Lrp1, Lcp1, Rab…
GO:0018105	peptidyl-serine phosphory	0.00985 ( 33 of 3350 genes )	0.00365 ( 124 of 34011 annotated genes )	3.896e-08	0.0001824	Raf1, Akt2, Uhmk1, Mapkapk2, Gsk3b, Prkdc, Lats1, Clk1, Smad7, Camk2d, Tgfbr2, Map4k1, Araf, Bcl2, Hk1, Ilk, Stk4, Mif, Lrrk2, Smg1, Prkd2, Braf, Tgfb1, Taf1, Phip, Lif, Adrbk1, Bax, Nlk, Pak2, Mapk14, Vegfa, Morc3,
GO:0043122	regulation of I-kappaB ki	0.01015 ( 34 of 3350 genes )	0.00382 ( 130 of 34011 annotated genes )	3.904e-08	0.0001827	Rela, Irf3, Zc3hav1, Prkcb, Chuk, Nfkbid, Slc20a1, Ndfip1, Shisa5, Ikbkb, Sqstm1, S100a13, Lgals1, Pdpk1, Zdhhc17, Rhoh, Flna, Card11, Ppm1a, Atp2c1, Pdcd11, Fkbp1a, Rnf31, Ube2v1, Zmynd11, Slc44a2, Stat1, Bst2, Lgals9, Eef1d, Mier1, BC031181, Malt1, Map3k14,
GO:0000082	G1/S transition of mitoti	0.00866 ( 29 of 3350 genes )	0.00297 ( 101 of 34011 annotated genes )	4.168e-08	0.0001951	Rfwd3, Ino80, Cdkn1b, Ppp3ca, Gpr132, Brd7, Rps6, Pim1, Cdc73, Ptprv, Adam17, Camk2d, Ccnd2, Bcl2, Id2, Ptpn6, Rcc1, Pten, Usp37, Tgfb1, Phf8, Rpl24, Casp2, Nfatc1, Eif4ebp1, Rhou, Trp53, Cdk4, Ppp2r5c,
GO:0032320	positive regulation of Ra	0.00746 ( 25 of 3350 genes )	0.00232 ( 79 of 34011 annotated genes )	4.243e-08	0.0001986	S1pr1, Rasa2, Pip5k1a, Akt2, Myo9b, Arhgap15, Gsk3b, Arhgap1, Arhgap4, Ralgapa2, Ccr7, Scrib, Rapgef2, Rasa1, Ralbp1, Ccl11, Gmip, Rap1gds1, Ndel1, Sipa1l1, Rasa3, Nckap1l, Sema4d, Rasal3, Arhgef10l,
GO:0001944	vasculature development	0.02567 ( 86 of 3350 genes )	0.01461 ( 497 of 34011 annotated genes )	4.512e-08	0.0002112	Bai2, Prkcb, Plcd1, Pnpla6, Frzb, Ets1, Smad7, Psen1, Nsdhl, Krit1, Egln1, Atp5b, Gpi1, Setd2, Prkd2, Chd7, Plcg1, Pde3b, Rock1, Pitx2, Ankrd17, Ubp1, Vezf1, Nfatc3, Gna13, Lox, Calcrl, Gpx1, Stat1, Tgfbr2, Rtn4, Runx1, Lama1, Erap1, Rbpj, Paxip1, Ddah1, Itgb3, Ccl5, Rapgef1, Lif, Hbegf, Reck, Wasf2, Itgb2, Arhgap24, Casp8, Stra6, Fgfr2, Foxo1, Gja5, Nr4a1, Pbrm1, Stk4, Rasa1, Ccl11, Pten, Apob, …
GO:0009152	purine ribonucleotide bio	0.00716 ( 24 of 3350 genes )	0.00218 ( 74 of 34011 annotated genes )	4.624e-08	0.0002165	Gart, Atp1a1, Ak1, Atp2c1, Atp2a1, Atp1b1, Atic, Atp5e, Atp2a2, Atp5b, Ak2, Atp12a, Adss, Txndc3, Tgfb1, Ak3, Ldhd, Aldoa, Atp5a1, Nme2, Atp5o, Atp5g3, Atp5h, Paics,
GO:0015931	nucleobase, nucleoside, n	0.00836 ( 28 of 3350 genes )	0.00282 ( 96 of 34011 annotated genes )	4.892e-08	0.000229	Snupn, Fmr1, Nup160, Bat1a, Rps28, Nxf1, Thoc5, Nup155, Rpsa, Xpo1, Nup210, Ddx39, Hnrnpa1, Nup54, Qk, Srsf10, Npm1, Tmem48, Hnrnpa2b1, Nupl1, Xpo7, Hnrnpa3, Thoc1, Slc29a2, Ranbp2, Eif5a, Pabpn1, Eny2,
GO:0009060	aerobic respiration	0.00448 ( 15 of 3350 genes )	0.00094 ( 32 of 34011 annotated genes )	5.657e-08	0.0002648	Sdha, Suclg1, Mdh2, Dlst, Aco1, Cox10, Aco2, Fxn, Oxa1l, Sdhc, Idh3g, Idh2, Ogdh, Cs, Idh3b,
GO:0034976	response to endoplasmic r	0.00537 ( 18 of 3350 genes )	0.00132 ( 45 of 34011 annotated genes )	5.673e-08	0.0002656	Ppp1r15a, Col4a3bp, Amfr, Hspa5, Gsk3b, Atp2a1, Sel1l, Vapb, Ddit3, A930001N09Rik, Creb3, Dnajc10, Ero1l, Os9, Derl2, Ccdc47, Trp53, Dnajc3,
GO:0043967	histone H4 acetylation	0.00537 ( 18 of 3350 genes )	0.00132 ( 45 of 34011 annotated genes )	5.673e-08	0.0002656	Usp22, Kat2a, Brd8, Ep300, Hcfc1, Ep400, Brd4, Ing4, Lef1, Ruvbl2, Morf4l1, Epc1, Nat15, Yeats4, Mll1, Ogt, Ncoa1, Ing3,
GO:0030522	intracellular receptor me	0.01045 ( 35 of 3350 genes )	0.00406 ( 138 of 34011 annotated genes )	5.739e-08	0.0002686	Kdm3a, Med14, Rara, Esrrg, Ywhah, Aldh1a3, Nr4a1, Ube3a, Arrb2, Snw1, Mll5, Nr2c1, Med12, Trim24, Safb, Ddx17, Med1, Ncoa2, Ep300, Calr, Med13, Hdac1, Park7, Arnt, Ubr5, Ezh2, Ddx5, Strn3, Lef1, Fkbp4, Asxl2, Arid1a, Ncoa3, Mll2, Phb,
GO:0009611	response to wounding	0.02925 ( 98 of 3350 genes )	0.01746 ( 594 of 34011 annotated genes )	6.091e-08	0.0002851	Uaca, Tyro3, Stat5b, Mustn1, Il25, Mapkapk2, Nfkbid, Adamts13, Plaa, Ccr7, Adora3, Spn, Ano6, Lat, Pecam1, Stk39, Ptk7, Itgb6, Gpx4, Gna13, Lox, Cd47, Pde2a, Stxbp1, Calcrl, Hmgcr, Gpx1, Alox5, Rtn4rl1, Rtn4, Bcl2, Scrib, Park7, Pycard, Evl, Rbpj, Npy5r, Lcp1, Psmb4, Itgb3, Il10, Ccl5, Ntrk3, Cyba, Il20rb, Ctla2a, Stxbp3a, Pik3cd, Hbegf, Itgb2, Tlr2, Rela, Foxp3, Nfkbiz, Pax7, Fermt3, Arfgef1, Ab…
GO:0048872	homeostasis of number of	0.01343 ( 45 of 3350 genes )	0.00597 ( 203 of 34011 annotated genes )	6.661e-08	0.0003118	Stat5b, Inpp5d, Rps24, Vps54, Ldb1, Foxp3, Sp3, Ets1, Adam17, Id2, Sod1, Ireb2, Rcor1, Mll5, Hcls1, Tgfb1, Sh2b2, Ikbkb, Pknox1, Maea, Bax, Add1, Rps14, Ppp3cb, Med1, Il7r, Vegfa, Rps19, Rps6, Exoc6, Rrn3, Bcl2, Mif, Kdm1a, Mtap7, Ncor1, Coro1a, Il20rb, Pde4b, Gigyf2, Nckap1l, Pik3cd, Slc37a4, Mapk14, Rps17,
GO:0002460	adaptive immune response	0.01224 ( 41 of 3350 genes )	0.00520 ( 177 of 34011 annotated genes )	6.983e-08	0.0003269	Inpp5d, Trpm4, Foxp3, Adam17, Ccr7, Ndfip1, C1qb, Spn, Il18bp, C4bp, Ptpn6, Prkcd, C8a, Klhl6, Tgfb1, Rab27a, Clcf1, Il4ra, Cr1l, Ppp3cb, H2-T23, Stat6, Il12rb1, Il7r, Vegfa, Rnf168, H2-D1, B2m, C3, Masp2, H2-K1, Tap1, Lig4, Dlg1, Pvr, Lef1, Paxip1, Hspd1, Malt1, Il20rb, Ptprc,
GO:0009607	response to biotic stimul	0.02925 ( 98 of 3350 genes )	0.01752 ( 596 of 34011 annotated genes )	7.189e-08	0.0003365	Stat5b, Hspa5, Zc3hav1, Otud5, Il25, Wasl, Rara, Mapkapk2, Upf2, Adam17, Ddx60, Ccr7, Hsp90aa1, Spn, Adh5, Apobec3, Mmp7, Vapb, Ddit3, Hsf1, A930001N09Rik, Oas1b, Il12rb1, Ass1, Trp53, Dnajc3, Amfr, Ddx21, Cd47, H2-K1, Stub1, Gpx1, Stat1, Crebzf, Bcl2, Bst2, Tmem173, H2-Q1, Pycard, Pvr, Ifnar1, Ncf2, Rbpj, Tmbim6, Il10, Ccl5, Ptprc, Pde4b, Paf1, Ifnb1, Derl2, Tbk1, Edem3, Tlr2, Rela, Irf3, Gsk3b,…
GO:0031334	positive regulation of pr	0.00806 ( 27 of 3350 genes )	0.00271 ( 92 of 34011 annotated genes )	7.314e-08	0.0003424	Bik, Terf1, Cdkn1b, Wasl, Gsk3b, Bclaf1, Stub1, Pfn2, Gnb2l1, Fam38a, Evl, Clip1, Dlg1, Snx9, Ccl11, Tgfb1, Paxip1, Actr3, Coro1a, Csf2, Bax, Nckap1l, Trp53, Vegfa, Sh3glb1, Rictor, Apc,
GO:0030183	B cell differentiation	0.00746 ( 25 of 3350 genes )	0.00238 ( 81 of 34011 annotated genes )	7.385e-08	0.0003457	Stat5b, Pcid2, Inpp5d, Pik3r1, Sp3, Prkdc, Foxp1, Adam17, Bcl2, Id2, Ikzf1, Ptpn6, Rbpj, Ikzf3, Lgals8, Clcf1, Rag1, Lgals1, Malt1, Ptprc, Bax, Nckap1l, Trp53, Il2rg, Card11,
GO:0030518	steroid hormone receptor	0.00746 ( 25 of 3350 genes )	0.00238 ( 81 of 34011 annotated genes )	7.385e-08	0.0003457	Kdm3a, Ncoa2, Med14, Rara, Ep300, Ywhah, Med13, Calr, Park7, Hdac1, Ubr5, Ube3a, Ddx5, Strn3, Arrb2, Lef1, Fkbp4, Med12, Arid1a, Ncoa3, Mll2, Safb, Ddx17, Med1, Phb,
GO:0016337	cell-cell adhesion	0.01731 ( 58 of 3350 genes )	0.00864 ( 294 of 34011 annotated genes )	7.836e-08	0.0003668	Tyro3, Pcdh12, Itgb2, Pvrl3, Vezt, Itga4, Smad7, Psen1, Nrcam, Fermt3, Myo10, Cd164, Spn, Fam38a, Prkcd, Amigo3, Cdhr1, Tgfb1, Lgals1, Bves, Dab1, Rock1, Cdh4, Lrp6, Sema4d, Cdh26, Efr3a, Celsr3, Map2k5, Pik3r1, Cd47, Stxbp1, Atp2c1, Bcl2, Lgals9, Selplg, Rpsa, Myh9, Scrib, Pcdh8, Lims1, Dlg1, Stk10, Pvr, Lef1, Itgal, Lmo7, Ccl5, Itgb3, Rapgef1, Ptprc, Cd2ap, Itga6, Stxbp3a, Dsg1a, Ret, Cyfip2, M…
GO:0000165	MAPKKK cascade	0.02328 ( 78 of 3350 genes )	0.01300 ( 442 of 34011 annotated genes )	8.118e-08	0.00038	Psen1, Fgf12, Mapk10, Ccr7, Ptpn6, Map3k5, Dusp19, Prkd2, Spag9, Mapk6, Rgs14, Psap, Psmd10, Apc, Lax1, Csk, Akt2, Hmgcr, Frs2, Zmynd11, Rnf41, Map4k1, Araf, Kiss1r, Zfp622, Cd27, Dusp7, Lrrk2, Zfp110, Robld3, Itgb3, Ccl5, Map4k2, Lif, Ptprc, Map2k7, Cdc42se1, Gnai2, Raf1, Map4k4, Madd, Igf1r, Igbp1, Fgfr2, Foxo1, Map2k2, Ilk, Tnik, Sod1, Arrb2, Prkcd, Cd81, Ccl11, Bnip2, Igfbp3, Tgfb1, Clcf1, Pa…
GO:0040029	regulation of gene expres	0.01045 ( 35 of 3350 genes )	0.00412 ( 140 of 34011 annotated genes )	8.447e-08	0.0003954	Baz1b, Ctcf, Gsk3b, Ehmt1, Gnas, Eif2c1, Dnmt3a, Ube2b, Tnrc6a, Mll5, Atf7ip, Trim27, Epc1, Mta2, Smchd1, Ubr2, Alkbh1, Hells, Brca1, Rbm3, Ubtf, Snip1, Tdrd1, Srrt, Zcchc11, Gpx1, Dnmt1, Dicer1, Rlim, Mier1, Phf8, Eed, Mll1, Mll2, Dnmt3b,
GO:0035295	tube development	0.02299 ( 77 of 3350 genes )	0.01279 ( 435 of 34011 annotated genes )	8.604e-08	0.0004028	Cfl1, Man1a2, Sp3, Rara, Psen1, Hsd11b1, Slc23a1, Rgma, Tns3, Setd2, Chd7, Lrp6, Ptk7, Pitx2, Nfatc3, Man2a1, Gna13, Lox, Hectd1, Stat1, Tgfbr2, Foxp2, Bcl2, l7Rn6, Gpsm2, Smad4, Scrib, Ppp1ca, Dlg1, Lama1, Rbpj, Tcfap2c, Lif, Aimp2, Numa1, Casp8, Vasp, Kat2a, Foxp1, Tctn1, Stra6, Fgfr2, Gja5, Ilk, Cux1, Stk4, Tshz3, Numb, Ccl11, Tgfb1, Sox17, Bat3, Smad2, Med12, Notch2, Cer1, Notch1, Med1, Vegfa…
GO:0002443	leukocyte mediated immuni	0.01343 ( 45 of 3350 genes )	0.00603 ( 205 of 34011 annotated genes )	9.035e-08	0.0004229	Stat5b, Inpp5d, Pi4k2a, Pram1, Trpm4, Foxp3, Abr, Adora3, Ndfip1, C1qb, Spn, C4bp, Ptpn6, Prkcd, Arrb2, C8a, Mll5, Lat, Tgfb1, Rab27a, Clcf1, Pdpk1, Cr1l, Ppp3cb, H2-T23, Stat6, Il7r, Bcr, Rnf168, Cplx2, H2-D1, B2m, C3, Masp2, H2-K1, Tap1, Clec2d, Lig4, Dlg1, Pvr, Paxip1, Hspd1, Malt1, Ptprc, Il20rb,
GO:0030010	establishment of cell pol	0.00657 ( 22 of 3350 genes )	0.00194 ( 66 of 34011 annotated genes )	9.578e-08	0.0004483	Cfl1, Cyth1, Myo9b, Igf1r, Gsk3b, Arfgef1, Ccr7, Krit1, Myh9, Gpsm2, Scrib, Mark2, Dock2, Lama1, Pafah1b1, Frmd4b, Frmd4a, Amotl1, Ptk7, Rap1b, Numa1, Exoc4,
GO:0060249	anatomical structure home	0.01164 ( 39 of 3350 genes )	0.00488 ( 166 of 34011 annotated genes )	9.652e-08	0.0004518	Tyro3, Inpp5d, Terf1, Smc5, Lpcat1, Vps54, Ldb1, Wrn, Rab7, Gnas, Sod1, Aldoa, Nsmce2, Bax, Add1, Lrp6, Tm7sf4, Mtm1, Vegfa, Apc, Csk, Prkdc, Ankrd11, Rac2, Tfrc, Bcl2, Tinf2, Rad50, Napsa, Smc6, Itgb3, Coro1a, Neurod1, Parp1, Il20rb, Pif1, Xrn1, Gigyf2, Ctss,
GO:0009260	ribonucleotide biosynthet	0.00746 ( 25 of 3350 genes )	0.00241 ( 82 of 34011 annotated genes )	9.664e-08	0.0004524	Gart, Atp1a1, Ak1, Atp2c1, Atp2a1, Atp1b1, Atic, Atp5e, Umps, Atp2a2, Atp5b, Ak2, Atp12a, Adss, Txndc3, Tgfb1, Ak3, Ldhd, Aldoa, Atp5a1, Nme2, Atp5o, Atp5g3, Atp5h, Paics,
GO:0016574	histone ubiquitination	0.00418 ( 14 of 3350 genes )	0.00085 ( 29 of 34011 annotated genes )	9.881e-08	0.0004625	Wac, Usp22, Bcor, Rag1, Rnf20, Pcgf1, Cdc73, Paf1, Ubr2, Leo1, Dtx3l, Ube2b, Rnf168, Huwe1,
GO:0002819	regulation of adaptive im	0.00866 ( 29 of 3350 genes )	0.00309 ( 105 of 34011 annotated genes )	1.061e-07	0.0004968	H2-D1, C3, B2m, Trpm4, Foxp3, H2-K1, Tap1, Ccr7, Ndfip1, Spn, Dusp10, Mif, Ptpn6, Pvr, Tgfb1, Paxip1, Clcf1, Hspd1, Trim27, Il4ra, Malt1, Ptprc, Il20rb, Ppp3cb, H2-T23, Stat6, Il12rb1, Il7r, Samsn1,
GO:0071156	regulation of cell cycle	0.01075 ( 36 of 3350 genes )	0.00435 ( 148 of 34011 annotated genes )	1.171e-07	0.0005483	Rfwd3, Pcid2, Chek2, Uimc1, Terf1, Ercc3, Mapkapk2, Usp28, Smc1a, Chfr, Mdm4, Id2, Bub3, Cep192, Tgfb1, Obfc2a, Hsf1, Rpl24, Trp53, Brca1, Apc, Foxo4, Wac, 3200002M19Rik, Brcc3, Crlf3, Rps6, Ptprv, Mif, Csnk2a1, Casp2, Neurod1, Ndrg1, Mapk14, Mad2l1, Ppp2r5c,
GO:0055065	metal ion homeostasis	0.01791 ( 60 of 3350 genes )	0.00920 ( 313 of 34011 annotated genes )	1.36e-07	0.0006366	Immt, Cul5, Cd52, Prkcb, Plcd1, Atp2a1, Psen1, Gnas, Cherp, Npy2r, Ndfip1, Ryr3, Atp2a2, Sod1, Slc30a1, Fis1, Tesc, Ireb2, Atp12a, Vapb, Aco1, Tgfb1, Cacna1c, Trim24, Bax, Adcyap1r1, Lrp6, Il6st, Ccdc47, Trpc2, S1pr1, Bcap31, Gna13, Cacna1a, Atp2c1, Kcnk3, Fkbp1a, Gnb1, Tfrc, P2rx4, Camk2d, Cxcl3, Bcl2, Trpm7, Dhrs7c, Itpr1, Diap1, Fth1, Lck, Itgb3, Ccl5, Abcb7, Fxn, Ptprc, Cacna1g, Mgea5, Dbi, S…
GO:0007519	skeletal muscle tissue de	0.01075 ( 36 of 3350 genes )	0.00438 ( 149 of 34011 annotated genes )	1.404e-07	0.000657	Foxp1, Pax7, Cav2, Fgfr2, Ilk, Hdac4, Igfbp3, Tgfb1, Sox17, Cacna2d2, Myog, Notch1, Mbnl3, Pitx2, Pik3r1, Ppp3ca, Homer1, Mbnl1, Ep300, Gpx1, Hmgcr, Utrn, Afg3l2, Foxp2, Bcl2, Csda, Psma6, Lrrk2, Col4a1, Myl6, Sik1, Sin3b, Usp19, Mapk14, Chrnd, Megf10,
GO:0045333	cellular respiration	0.00716 ( 24 of 3350 genes )	0.00229 ( 78 of 34011 annotated genes )	1.428e-07	0.0006687	Sdha, Nfatc3, Suclg1, Mdh2, Ndufs1, Ndufc2, Uqcrc1, Mat2a, Cox10, Aco2, Idh3g, Idh2, Dld, Ogdh, Dlst, Aco1, Fxn, Uqcr10, Oxa1l, Bax, Sdhc, Fastkd3, Cs, Idh3b,
GO:0043269	regulation of ion transpo	0.01851 ( 62 of 3350 genes )	0.00964 ( 328 of 34011 annotated genes )	1.43e-07	0.0006694	Vdac1, Kcnh8, Trpm4, Trpm5, Kcnh1, Ywhah, Gpr89, Gnas, Nalcn, Clic1, Slc30a1, Tesc, Arrb2, Clcn1, Trpv2, Tgfb1, Ikbkb, Trim27, Stk39, Pxk, Cacna1c, Cacna2d2, Tpcn1, Bax, Kcnc2, Creb3, Adcyap1r1, Tspo, Stim1, Akt2, Atp1a1, Homer1, Nedd4l, Cacna1a, Kcnk3, Fkbp1a, Scn1a, P2rx4, Camk2d, Slc9a3r1, Bcl2, Hk1, Park7, Dhrs7c, Mif, Ahcyl1, Dlg1, Itpr1, Diap1, Sik1, Kcnj12, Ccl5, Sestd1, Crbn, Cacna1g, Mge…
GO:0006099	tricarboxylic acid cycle	0.00358 ( 12 of 3350 genes )	0.00065 ( 22 of 34011 annotated genes )	1.46e-07	0.0006834	Sdha, Suclg1, Mdh2, Dlst, Aco1, Aco2, Sdhc, Idh2, Idh3g, Ogdh, Cs, Idh3b,
GO:0060538	skeletal muscle organ dev	0.01104 ( 37 of 3350 genes )	0.00459 ( 156 of 34011 annotated genes )	1.572e-07	0.0007358	Foxp1, Stra6, Pax7, Cav2, Fgfr2, Ilk, Hdac4, Igfbp3, Tgfb1, Sox17, Cacna2d2, Myog, Notch1, Mbnl3, Pitx2, Pik3r1, Ppp3ca, Homer1, Mbnl1, Ep300, Gpx1, Hmgcr, Utrn, Afg3l2, Foxp2, Bcl2, Csda, Psma6, Lrrk2, Col4a1, Myl6, Sik1, Sin3b, Usp19, Mapk14, Chrnd, Megf10,
GO:0032272	negative regulation of pr	0.00507 ( 17 of 3350 genes )	0.00126 ( 43 of 34011 annotated genes )	1.622e-07	0.0007594	Tmsb10, Pfn1, Spnb2, Capza1, Pfn2, Arfgef1, Mapre1, Tbcd, Evl, Prkcd, Rdx, Capzb, Fkbp4, Add1, Tmod3, Tpm1, Spna2,
GO:0071900	regulation of protein ser	0.01701 ( 57 of 3350 genes )	0.00861 ( 293 of 34011 annotated genes )	1.653e-07	0.0007739	Ccnl2, Madd, Gsk3b, Lats1, Psen1, Adam17, Ccnd2, Map2k2, Ccr7, Ilk, Stk4, Sod1, Ptpn6, Map3k5, Prkcd, Pten, Gba, Cd81, Dusp19, Tgfb1, Ppp2ca, Spag9, Ccnk, Kat2b, Rgs14, Lrp6, Hsp90ab1, Dusp1, Vegfa, Psmd10, Apc, Lax1, Cdkn1b, Csk, Map2k5, Pim1, Ghr, Hmgcr, Trib1, Frs2, Wnk1, Pik3r6, Ccnl1, Rgs2, Dusp10, Mif, Dusp7, Dvl3, Lrrk2, Stk38, Map4k2, Malt1, Ptprc, Map2k7, Cspg4, Mapk8ip3, Magi3,
GO:0043392	negative regulation of DN	0.00955 ( 32 of 3350 genes )	0.00368 ( 125 of 34011 annotated genes )	1.654e-07	0.0007744	Trib2, Foxp3, Irak2, Smad7, Nfkbid, Id2, Rsf1, Tax1bp1, Egln1, Arrb2, Hdac4, Ddit3, Sigirr, Trim21, Flna, Usp7, Sp100, Psmd10, Rps3, Map2k5, Zcchc11, Pim1, Nlrc5, Trib1, Nlrc3, Kdm1a, Lef1, Rlim, Sik1, Hspa4, Cyld, Ptch1,
GO:0043433	negative regulation of tr	0.00866 ( 29 of 3350 genes )	0.00315 ( 107 of 34011 annotated genes )	1.657e-07	0.0007756	Rps3, Trib2, Map2k5, Foxp3, Zcchc11, Irak2, Smad7, Pim1, Nfkbid, Trib1, Nlrc5, Nlrc3, Id2, Tax1bp1, Egln1, Kdm1a, Arrb2, Hdac4, Rlim, Ddit3, Sik1, Sigirr, Trim21, Flna, Cyld, Usp7, Ptch1, Sp100, Psmd10,
GO:0090048	negative regulation of tr	0.00866 ( 29 of 3350 genes )	0.00315 ( 107 of 34011 annotated genes )	1.657e-07	0.0007756	Rps3, Trib2, Map2k5, Foxp3, Zcchc11, Irak2, Smad7, Pim1, Nfkbid, Trib1, Nlrc5, Nlrc3, Id2, Tax1bp1, Egln1, Kdm1a, Arrb2, Hdac4, Rlim, Ddit3, Sik1, Sigirr, Trim21, Flna, Cyld, Usp7, Ptch1, Sp100, Psmd10,
GO:0015980	energy derivation by oxid	0.01075 ( 36 of 3350 genes )	0.00441 ( 150 of 34011 annotated genes )	1.678e-07	0.0007856	Suclg1, Pcdh12, Ndufs1, Ndufc2, Mat2a, Gsk3b, Gnas, Dlst, Aco1, Oxa1l, Bax, Ppp1cc, Sdhc, Il6st, Nfatc3, Sdha, Mdh2, Akt2, Uqcrc1, Aco2, Cox10, Ppp1cb, Idh2, Idh3g, Dld, Ogdh, Ppp1ca, Ppp1r3b, Fxn, Acadm, Uqcr10, Sorbs1, Fastkd3, Slc37a4, Cs, Idh3b,
GO:0005996	monosaccharide metabolic	0.01493 ( 50 of 3350 genes )	0.00717 ( 244 of 34011 annotated genes )	1.781e-07	0.0008339	B3galnt2, Arpp19, Prkaa1, Cmah, Pgm3, Fabp5, Taldo1, Hsd11b1, Entpd5, Foxo1, St6gal2, Ldha, Gpi1, Tsta3, Hdac4, Igfbp3, Ugp2, Aldoa, Pfkp, Man2c1, Pdha2, Akr1a4, Mdp1, Man2a1, Man2a2, Akt2, Pik3r1, Gnpnat1, Chst15, Cacna1a, B4galt1, Ppp1cb, Hk1, Pdha1, Man2b1, Ogdh, Ppp1ca, Mif, Pdk1, G6pc3, Sik1, Ppp1r3b, Ncor1, Acadm, Mgea5, Cmas, Sorbs1, Pgam1, Glyr1, Mapk14,
GO:0007051	spindle organization	0.00627 ( 21 of 3350 genes )	0.00185 ( 63 of 34011 annotated genes )	1.864e-07	0.0008726	Ino80, Chek2, Haus4, Ckap5, Kif2a, Cltc, Csnk1d, Myh9, Sbds, Ralbp1, Rcc1, Cep192, Chd3, Dicer1, Ncor1, Senp6, 6720463M24Rik, Rnf4, Rgs14, Flna, Racgap1,
GO:0006887	exocytosis	0.01254 ( 42 of 3350 genes )	0.00559 ( 190 of 34011 annotated genes )	1.948e-07	0.0009119	Rims4, Rab9, Pi4k2a, Pram1, Exoc2, Rph3al, Llgl1, Psen1, Pfn2, Snapin, Abr, Adora3, Lat, Rapgef4, Rab27a, Pdpk1, Cacna1c, Scfd1, Ncs1, Ppp3cb, Notch1, Bcr, Cplx2, Exoc4, Myh10, Trpc2, Vps33b, Cadps, Cacna1a, Stxbp1, B4galt1, Arfgef2, Exoc1, Scrib, Stx4a, Stx3, Sdf4, Ccl5, Rab8a, Cacna1g, Stxbp3a, Nsf,
GO:0019226	transmission of nerve imp	0.02687 ( 90 of 3350 genes )	0.01602 ( 545 of 34011 annotated genes )	1.987e-07	0.0009299	Hrh1, Rims4, Gabbr1, Rara, Psen1, Fgf12, Dlg4, Pfn2, Cav2, Snapin, Anapc2, Npy2r, Slc17a7, Sez6, Gad2, Clcn1, Rapgef4, Atad1, Ppt1, Cacna2d2, Sipa1l1, Nfasc, Ncs1, Gria1, Rgs14, Lrp6, Dpysl2, Cplx2, Pde1b, Akt2, Ppp3ca, Ap2b1, Stxbp1, Scrib, Park7, Kiss1r, Agtpbp1, Npy5r, Rab8a, Grid2ip, Ddc, Dlg2, Fnta, Gnai2, Kcnq2, Vdac3, Dbi, Gabra6, Gnpat, Egr2, Frmpd4, Vdac1, Gsk3b, Nab1, Mpdz, Nrcam, Fgfr2…
GO:0035637	multicellular organismal	0.02687 ( 90 of 3350 genes )	0.01602 ( 545 of 34011 annotated genes )	1.987e-07	0.0009299	Hrh1, Rims4, Gabbr1, Rara, Psen1, Fgf12, Dlg4, Pfn2, Cav2, Snapin, Anapc2, Npy2r, Slc17a7, Sez6, Gad2, Clcn1, Rapgef4, Atad1, Ppt1, Cacna2d2, Sipa1l1, Nfasc, Ncs1, Gria1, Rgs14, Lrp6, Dpysl2, Cplx2, Pde1b, Akt2, Ppp3ca, Ap2b1, Stxbp1, Scrib, Park7, Kiss1r, Agtpbp1, Npy5r, Rab8a, Grid2ip, Ddc, Dlg2, Fnta, Gnai2, Kcnq2, Vdac3, Dbi, Gabra6, Gnpat, Egr2, Frmpd4, Vdac1, Gsk3b, Nab1, Mpdz, Nrcam, Fgfr2…
GO:0030334	regulation of cell migrat	0.02030 ( 68 of 3350 genes )	0.01106 ( 376 of 34011 annotated genes )	2.098e-07	0.0009823	Ets1, Adam17, Ccr7, Adora3, Krit1, Gnb2l1, Prkd2, Rapgef4, Pecam1, Spag9, Rnf20, Spata13, Plcg1, Ptp4a1, Trp53, Pitx2, Il6st, Apc, Sell, Akt2, Pik3r1, Gna13, Msn, Tgfbr2, Rtn4, Rnf41, Bcl2, Kiss1r, Diap1, Lama1, 1810046J19Rik, Ccl5, Itgb3, Coro1a, Ptprc, Sema3a, Nckap1l, Rap2c, Hbegf, Tlr2, Igf1r, Arhgap4, Abr, Macf1, Ilk, Ccl11, Pten, Igfbp3, Tgfb1, Pdpk1, Creb3, Amotl1, Notch1, Bcr, Vegfa, Sema…
GO:0031347	regulation of defense res	0.01642 ( 55 of 3350 genes )	0.00826 ( 281 of 34011 annotated genes )	2.194e-07	0.001027	Uaca, Tyro3, Stat5b, Tlr2, Rela, Irf3, Zc3hav1, Foxp3, Mapkapk2, Pcbp2, Abr, Adora3, Ccr7, Ndfip1, Spn, Cd86, Mill2, Arrb2, Clcf1, Stk39, Pdpk1, Polr3f, Cr1l, Creb3, Med1, Il12rb1, Bcr, Cdc37, Gpx4, C3, Cd47, Psma1, Pde2a, Tap1, Calcrl, Clec2d, Gpx1, Nlrc5, Tmem173, Dusp10, Park7, Pycard, Polr3c, Mif, Pvr, Npy5r, Hspd1, Psmb4, Ccl5, Il10, Trim30a, Samhd1, Ctla2a, Il20rb, Tbk1,
GO:0032956	regulation of actin cytos	0.01104 ( 37 of 3350 genes )	0.00465 ( 158 of 34011 annotated genes )	2.218e-07	0.001038	Cfl1, Tmsb10, Phpt1, Ssh1, Wasl, Ssh2, Lats1, Spnb2, Capza1, Pfn2, Arfgef1, Ilk, Rasa1, Prex1, Prkcd, Ccl11, Capzb, Actr3, Add1, Clec2i, Rictor, Pfn1, S1pr1, Ep300, Epha5, Kiss1r, Evl, Dlg1, Rdx, Lrp1, Coro1a, Nckap1l, Fhod1, Tmod3, Tpm1, Arhgef10l, Spna2,
GO:0034504	protein localization to n	0.01403 ( 47 of 3350 genes )	0.00662 ( 225 of 34011 annotated genes )	2.274e-07	0.001065	Uaca, Snupn, Cfl1, Tmem188, Tlr2, Arntl, Gsk3b, Ogg1, Tnpo3, Spnb2, Cherp, Nup155, Hsp90aa1, Xpo1, Nop58, Tgfb1, Rpl11, Creb3, Med1, Flna, Hsp90ab1, Trp53, Kpna6, Psmd10, Morc3, Pik3r1, Ppp3ca, Syne1, Pde2a, Pikfyve, Ep300, Pola2, Emd, Calr, Oprd1, l7Rn6, Tmem173, Smad4, Banp, Ubr5, Rbm22, Kpnb1, Ing1, Cep57, Phip, Cyld, Mapk14,
GO:0016197	endosome transport	0.00776 ( 26 of 3350 genes )	0.00268 ( 91 of 34011 annotated genes )	2.286e-07	0.00107	Fam160a2, Arl4c, Vps54, Rab7, Pikfyve, Rab11fip3, Erc1, Vps24, Lrba, Scyl2, Trak1, A230046K03Rik, Picalm, Vti1a, Snx1, Vps4b, Spag9, Agap2, Stx5a, Ehd3, Zfyve16, Snx27, Rab14, Flna, Mtm1, Lrp2,
GO:0051028	mRNA transport	0.00657 ( 22 of 3350 genes )	0.00203 ( 69 of 34011 annotated genes )	2.332e-07	0.001092	Fmr1, Nup160, Bat1a, Nxf1, Thoc5, Nup155, Xpo1, Nup210, Ddx39, Hnrnpa1, Nup54, Qk, Srsf10, Tmem48, Nupl1, Xpo7, Hnrnpa3, Thoc1, Eif5a, Pabpn1, Ranbp2, Eny2,
GO:0042327	positive regulation of ph	0.01642 ( 55 of 3350 genes )	0.00829 ( 282 of 34011 annotated genes )	2.475e-07	0.001159	Vac14, Raf1, Gsk3b, Lats1, Psen1, Gnas, Adam17, Ccnd2, Gnb2l1, Csnk1d, Ilk, Rgma, Arrb2, Cd81, Hcls1, Tgfb1, Bmp5, Cd3e, Sqstm1, Pecam1, Clcf1, Pak2, Trp53, Il6st, Vegfa, Tnfrsf14, Sema4d, Rictor, Cd6, Itsn1, Akt2, Pik3r1, Ep300, Ghr, Ripk1, Bcl2, Araf, Smad4, Mif, Dvl3, Lrrk2, Rad50, Braf, Tnk2, Cd4, Ccl5, Itgb3, Lck, Phip, Lif, Csf2, Itga6, Nckap1l, Rap2c, Cspg4,
GO:0002703	regulation of leukocyte m	0.00896 ( 30 of 3350 genes )	0.00338 ( 115 of 34011 annotated genes )	2.552e-07	0.001194	Stat5b, H2-D1, Pram1, C3, B2m, Trpm4, Foxp3, H2-K1, Tap1, Clec2d, Abr, Adora3, Ndfip1, Spn, Ptpn6, Pvr, Arrb2, Tgfb1, Paxip1, Clcf1, Hspd1, Pdpk1, Malt1, Ptprc, Il20rb, Ppp3cb, H2-T23, Stat6, Il7r, Bcr,
GO:0031056	regulation of histone mod	0.00597 ( 20 of 3350 genes )	0.00173 ( 59 of 34011 annotated genes )	2.659e-07	0.001245	Kdm3a, Foxp3, Ctcf, Nipbl, Brd7, Srebf1, Wbp7, Ube2b, Dnmt1, Kdm1a, Jarid2, Tgfb1, Ncor1, Paxip1, Bcor, Mll1, Ogt, Trp53, Dnmt3b, Brca1,
GO:0042770	signal transduction in re	0.00746 ( 25 of 3350 genes )	0.00253 ( 86 of 34011 annotated genes )	2.693e-07	0.00126	Uaca, Chek2, Pgap2, Ep300, Usp28, Smc1a, Ptprv, Ikbke, Hipk1, Mif, Ddx5, Ing4, Kdm1a, 5730403B10Rik, Bat3, Paxip1, Setd8, Casp2, Npm1, Trp53, Brca1, Mapk14, Ppp2r5c, Sp100, Psmd10,
GO:0046356	acetyl-CoA catabolic proc	0.00358 ( 12 of 3350 genes )	0.00068 ( 23 of 34011 annotated genes )	2.786e-07	0.001304	Sdha, Suclg1, Mdh2, Dlst, Aco1, Aco2, Sdhc, Idh2, Idh3g, Ogdh, Cs, Idh3b,
GO:0010740	positive regulation of in	0.01910 ( 64 of 3350 genes )	0.01026 ( 349 of 34011 annotated genes )	2.829e-07	0.001324	Zc3hav1, Prkcb, Slc20a1, Prkd2, Hcls1, Pecam1, S100a13, Lgals1, Spag9, Flna, Il6st, Akr1b3, Itsn1, Rnf31, Gpx1, Hmgcr, Slc44a2, Lgals9, Bst2, Zfp622, Cd27, Eef1d, Mier1, Ccl5, Itgb3, Map4k2, Lif, Agap2, Ptprc, Hbegf, Irf3, Rela, Igf1r, Chuk, Fgfr2, Ndfip1, Ilk, Shisa5, Arrb2, Prkcd, Bnip2, Igfbp3, Tgfb1, Clcf1, Zdhhc17, Notch1, Vegfa, Card11, Rictor, Ppm1a, C3, Atp2c1, Pdcd11, Ghr, Fkbp1a, Crlf3,…
GO:0051348	negative regulation of tr	0.01075 ( 36 of 3350 genes )	0.00450 ( 153 of 34011 annotated genes )	2.834e-07	0.001327	Terf1, Pik3ip1, Igf1r, Gsk3b, Lats1, Psen1, Prdx3, Gnb2l1, Oas1d, Ilk, Ptpn6, Prkcd, Pten, Dusp19, Gba, Trim27, Pdpk1, Kat2b, Rgs14, Lrp6, Dusp1, Dnajc3, Apc, Lax1, Cdkn1b, Csk, Hmgcr, Trib1, Wnk1, Rgs2, Dusp10, Dusp7, Dbndd2, Stk38, Pif1, Ptprc,
GO:0008360	regulation of cell shape	0.00776 ( 26 of 3350 genes )	0.00271 ( 92 of 34011 annotated genes )	2.898e-07	0.001357	Myh10, Gna13, Arhgap15, Fyn, Ezr, Myo10, Gas2, Myh9, Prpf40a, Arhgef18, Myl12b, Epb4.1l2, Epb4.1, Ccl11, Diap1, Aldoa, Brwd1, S100a13, Bves, Sh3kbp1, Coro1a, Cdc42se1, Rhou, Cdc42ep3, Vegfa, Sema4d,
GO:0070076	histone lysine demethylat	0.00299 ( 10 of 3350 genes )	0.00047 ( 16 of 34011 annotated genes )	2.901e-07	0.001358	Kdm5c, Kdm1a, Kdm3a, Kdm4c, Phf8, Kdm5b, Kdm2a, Kdm5d, Ube2b, Jhdm1d,
GO:0042180	cellular ketone metabolic	0.03284 ( 110 of 3350 genes )	0.02091 ( 711 of 34011 annotated genes )	2.924e-07	0.001369	Stat5b, Suclg1, Pdxdc1, Prkaa1, Mat2a, Tars2, Gars, Rars2, St6gal2, Pdpr, Aldh1a3, Dnmt3a, Asl, Ldha, Apip, Olah, Dlst, Gad2, Aco1, Cars2, Atg7, Lta4h, Ido2, Dtd1, Qrsl1, Ass1, Sh3glb1, Apc, Mthfd1l, Mdh2, Iars, Mars, Gpx4, Gart, Akt2, Tecr, Hmgcr, Gpx1, Alox5, Idh3g, Gsta1, Dld, Ogdh, Ddah2, Gpx3, Ddah1, Agpat6, Adipor2, Ddc, Dbi, Dnmt3b, Cs, Idh3b, Mat2b, Arpp19, Cmah, Ncor2, H2-Ke6, Aloxe3, Gs…
GO:0050854	regulation of antigen rec	0.00388 ( 13 of 3350 genes )	0.00079 ( 27 of 34011 annotated genes )	2.967e-07	0.001389	Ptpn6, Phpt1, Prkd2, Prkcb, Prkch, Lck, Cblb, Ubash3a, Malt1, Ptprc, Ccr7, Ptpn22, Kcnn4,
GO:0043112	receptor metabolic proces	0.00955 ( 32 of 3350 genes )	0.00376 ( 128 of 34011 annotated genes )	2.97e-07	0.00139	Mylip, Dnm2, Hnrnpk, Capn1, Cacna1a, Calcrl, Psen1, Ghr, Dlg4, Cltc, Arfgef2, Scyl2, Scrib, Hdac1, Picalm, Arrb2, Tgfb1, Wdr19, Itgb3, Il10, Atad1, Bves, Gtf2h2, Adrbk1, Dlg2, Fnta, Ece1, Gria1, Clec2i, Flna, Vegfa, Nsf,
GO:0010638	positive regulation of or	0.01254 ( 42 of 3350 genes )	0.00567 ( 193 of 34011 annotated genes )	3.064e-07	0.001434	Cfl1, Terf1, Smc5, Foxp3, Wasl, Brd7, Pfn2, Pten, Ccl11, Tgfb1, Npm1, Actr3, Nsmce2, Bax, Trp53, Brca1, Rictor, Apc, Bik, Cdkn1b, Dnm1l, Mff, Pfn1, Ep300, Nipbl, Srebf1, Kiss1r, Dnmt1, Evl, Dlg1, Clip1, Tinf2, Jarid2, Ncor1, Paxip1, Coro1a, Ogt, Nckap1l, Fhod1, Dnmt3b, Arhgef10l, Rock2,
GO:0022037	metencephalon development	0.00657 ( 22 of 3350 genes )	0.00206 ( 70 of 34011 annotated genes )	3.096e-07	0.001449	Myh10, Nr2c2, Hspa5, Rfx4, Ldb1, Kat2a, Ptprs, Foxp3, Cacna1a, Hoxa1, Foxp2, Bcl2, Cntn1, Ezh2, Gas1, Agtpbp1, Sdf4, Atg7, Dab1, Neurod1, Lrp6, Gnpat,
GO:0045927	positive regulation of gr	0.01104 ( 37 of 3350 genes )	0.00470 ( 160 of 34011 annotated genes )	3.105e-07	0.001453	Stat5b, Ino80, Creb1, Adam17, Anapc2, Ilk, 2400003C14Rik, Usp47, Mtpn, Trpv2, Ndel1, Chd7, Hsf1, Pafah1b1, Nol8, Cacna2d2, Cdh4, Sema4d, Celf1, Psmd10, Map2k5, C3, Ep300, Nipbl, Ghr, Bcl2, Csda, Ikzf1, Dlg1, Lef1, Islr2, Fxn, Ntrk3, Cyba, Ncoa3, Hbegf, Derl2,
GO:0006818	hydrogen transport	0.00716 ( 24 of 3350 genes )	0.00241 ( 82 of 34011 annotated genes )	4.035e-07	0.001889	Cox7c, Cox6c, Atp5e, Slc9a3r1, Park7, Atp6v1g1, Atp6v0e, Atp5b, Tesc, Atp12a, Atp6v0a2, Atp6v1c1, Adhfe1, Atp6v1e1, Atp6ap1, Slc9a8, Atp5a1, Uqcr11, Atp5o, Atp5g3, Atp6v1d, Nhedc2, Atp5h, Atp6v0b,
GO:0016055	Wnt receptor signaling pa	0.01731 ( 58 of 3350 genes )	0.00906 ( 308 of 34011 annotated genes )	4.048e-07	0.001895	Tlr2, Prkaa1, Csnk1a1, Ldb1, Trpm4, Gsk3b, Csnk1g3, Lats1, Frzb, Dkk3, Brd7, Cdc73, Fgfr2, Macf1, Csnk1d, Scyl2, Ilk, Tnik, Ube2b, Als2cr4, Stk4, Zranb1, Chd8, Pten, Ddit3, Sox17, Med12, Csnk1g1, Notch1, Amotl1, Lrp6, Ptk7, Pitx2, Tcf7, Nfkb1, Apc, Ppm1a, Csnk1g2, Emd, Tcf7l1, Slc9a3r1, Leo1, Hdac1, Tbl1x, Mark2, Ubr5, Dvl3, Lef1, Lrp1, Cul3, Csnk2a1, Paf1, Mllt3, Nlk, Cyld, Ccdc88c, Tle3, Cxxc4,
GO:0030003	cellular cation homeostas	0.01851 ( 62 of 3350 genes )	0.00994 ( 338 of 34011 annotated genes )	4.262e-07	0.001995	Immt, Cul5, Cd52, Prkcb, Plcd1, Atp2a1, Psen1, Cherp, Npy2r, Ndfip1, Atox1, Slc30a2, Ryr3, Atp2a2, Sod1, Slc30a1, Atp5b, Fis1, Tesc, Ireb2, Vapb, Aco1, Tgfb1, Slc9a8, Cacna1c, Ppt1, Bax, Adcyap1r1, Lrp6, Trp53, Il6st, Trpc2, S1pr1, Bcap31, Gna13, Cacna1a, Atp2c1, Kcnk3, Fkbp1a, Gnb1, Tfrc, P2rx4, Camk2d, Cxcl3, Bcl2, Trpm7, Dhrs7c, Itpr1, Diap1, Fth1, Lck, Ccl5, Itgb3, Abcb7, Fxn, Ptprc, Cacna1g,…
GO:0051147	regulation of muscle cell	0.00687 ( 23 of 3350 genes )	0.00226 ( 77 of 34011 annotated genes )	4.68e-07	0.00219	Foxo4, Pik3r1, Zeb1, Ep300, Ptbp1, Fgfr2, Bcl2, Ilk, Ezh2, Tshz3, Hdac4, Med28, Ybx1, Igfbp3, Tgfb1, Sik1, Setd3, Epc1, Notch1, Mbnl3, Ankrd17, Eif5a, Megf10,
GO:0042391	regulation of membrane po	0.01582 ( 53 of 3350 genes )	0.00803 ( 273 of 34011 annotated genes )	4.709e-07	0.002204	Rims4, Egr2, Ndufs1, Trpm4, Rara, Nab1, Mpdz, Smad7, Psen1, Dlg4, Prdx3, Npy2r, Spg20, Gja5, Ilk, Adam22, Clic1, Fam38a, Sod1, Slc17a7, Sez6, Pten, Tgfb1, Nfasc, Bax, Kcnc2, Gria1, Tspo, Akt2, Ppp3ca, Hexa, Cacna1a, Fyn, Eif2b2, Scn1a, P2rx4, Afg3l2, Park7, Dld, Dlg1, Lrrk2, Dicer1, Qk, Ypel1, Cacna1g, Cd9, Kcnq2, Mgea5, Mpp5, Ndrg1, Kcnn4, Chrnd, Gnpat,
GO:0048864	stem cell development	0.00806 ( 27 of 3350 genes )	0.00294 ( 100 of 34011 annotated genes )	4.739e-07	0.002218	Med15, Med14, Ldb1, Zhx2, Zcchc11, Nipbl, Smc3, Cdc73, Smc1a, Tcf7l1, Msi2, Crebbp, Lig4, Leo1, Stag2, Setd2, Med28, Rbpj, Dicer1, Med12, Tcfap2c, Lif, Paf1, Ptprc, Myst3, Sall4, Apc,
GO:0043388	positive regulation of DN	0.01164 ( 39 of 3350 genes )	0.00517 ( 176 of 34011 annotated genes )	4.893e-07	0.00229	Rhebl1, Itgb2, Tlr2, Rela, Prkcb, Irak2, Prdx3, Crebbp, Hipk1, Mtpn, Pten, Hdac4, Prkd2, Tgfb1, Ikbkb, Crtc3, Npm1, Lrp6, Pitx2, Vegfa, Sp100, Card11, Prkch, Ep300, Ube2v1, Rnf31, Epha5, Brd4, Ripk1, Pycard, Kdm1a, Psma6, Ddr2, Calm1, Il10, Malt1, Hmgn3, Neurod1, Ncoa3,
GO:0006066	alcohol metabolic process	0.02418 ( 81 of 3350 genes )	0.01426 ( 485 of 34011 annotated genes )	4.964e-07	0.002323	B3galnt2, Prkaa1, Fabp5, Taldo1, Pnpla6, Nsdhl, Hsd11b1, St6gal2, Adh5, Ldha, Gpi1, Gba, Ugp2, Sgpp2, 0610007P14Rik, Akr1b3, Mdp1, Pde1b, Man2a1, Man2a2, Akt2, Pik3r1, Hmgcr, Ppp1cb, Ogdh, Man2b1, Ppp1ca, Pdk1, G6pc3, Ppp1r3b, Agpat6, Ddc, Mgea5, Pgam1, Arpp19, Cmah, Pgm3, Entpd5, Hdlbp, Foxo1, Etnk1, Soat1, Sod1, Tsta3, Hdac4, Apob, Igfbp3, Scarb1, Aldoa, Chdh, Pfkp, Man2c1, Hmgcs1, Med1, Pdha2,…
GO:0031060	regulation of histone met	0.00358 ( 12 of 3350 genes )	0.00071 ( 24 of 34011 annotated genes )	5.085e-07	0.00238	Kdm1a, Kdm3a, Jarid2, Paxip1, Ctcf, Bcor, Ogt, Mll1, Wbp7, Brca1, Dnmt3b, Dnmt1,
GO:0050673	epithelial cell prolifera	0.01403 ( 47 of 3350 genes )	0.00682 ( 232 of 34011 annotated genes )	5.796e-07	0.002713	Foxp1, Chuk, Psen1, Cdc73, Cav2, Fgfr2, Ccnd2, BC004004, Krit1, Nr4a1, Id2, Pten, Ccl11, Prkd2, Tgfb1, Bmp5, Scarb1, Atp5a1, Bax, Col8a2, Runx3, Notch1, Stat6, Med1, Lrp6, Vegfa, Rictor, Deaf1, Apc, Cdkn1b, Wdr77, Map2k5, B4galt1, Gpx1, Frs2, Stat1, Foxp2, Dlg1, Gas1, Tinf2, Itgb3, Tcfap2c, Agap2, Nme2, Cyba, Aimp1, Ptch1,
GO:0006513	protein monoubiquitinatio	0.00448 ( 15 of 3350 genes )	0.00109 ( 37 of 34011 annotated genes )	5.892e-07	0.002758	Wac, Bcor, Ube2d3, Rag1, Cul3, Cul1, Rnf20, Pcgf1, Cdc73, Trim21, Paf1, Leo1, Dtx3l, Ube2b, Huwe1,
GO:0019752	carboxylic acid metabolic	0.03134 ( 105 of 3350 genes )	0.01999 ( 680 of 34011 annotated genes )	5.923e-07	0.002772	Stat5b, Suclg1, Pdxdc1, Prkaa1, Mat2a, Tars2, Gars, Rars2, St6gal2, Pdpr, Aldh1a3, Dnmt3a, Asl, Ldha, Apip, Olah, Dlst, Gad2, Aco1, Cars2, Atg7, Lta4h, Ido2, Dtd1, Qrsl1, Ass1, Sh3glb1, Apc, Mthfd1l, Mdh2, Iars, Mars, Gpx4, Gart, Akt2, Tecr, Gpx1, Alox5, Idh3g, Gsta1, Dld, Ogdh, Ddah2, Gpx3, Ddah1, Agpat6, Adipor2, Ddc, Dbi, Dnmt3b, Cs, Idh3b, Mat2b, Cmah, H2-Ke6, Aloxe3, Gsr, Nars, Cyp4v3, Gstp2…
GO:0043436	oxoacid metabolic process	0.03134 ( 105 of 3350 genes )	0.01999 ( 680 of 34011 annotated genes )	5.923e-07	0.002772	Stat5b, Suclg1, Pdxdc1, Prkaa1, Mat2a, Tars2, Gars, Rars2, St6gal2, Pdpr, Aldh1a3, Dnmt3a, Asl, Ldha, Apip, Olah, Dlst, Gad2, Aco1, Cars2, Atg7, Lta4h, Ido2, Dtd1, Qrsl1, Ass1, Sh3glb1, Apc, Mthfd1l, Mdh2, Iars, Mars, Gpx4, Gart, Akt2, Tecr, Gpx1, Alox5, Idh3g, Gsta1, Dld, Ogdh, Ddah2, Gpx3, Ddah1, Agpat6, Adipor2, Ddc, Dbi, Dnmt3b, Cs, Idh3b, Mat2b, Cmah, H2-Ke6, Aloxe3, Gsr, Nars, Cyp4v3, Gstp2…
GO:0010948	negative regulation of ce	0.00627 ( 21 of 3350 genes )	0.00197 ( 67 of 34011 annotated genes )	6.011e-07	0.002814	Pcid2, Terf1, 3200002M19Rik, Brd7, Smc3, Crlf3, Cdc73, Smc1a, Fgfr2, Mdm4, Usp47, Stag2, Mif, Cep192, Gas1, Pten, Apbb2, Lif, Paf1, Mad2l1, Apc,
GO:0055001	muscle cell development	0.01045 ( 35 of 3350 genes )	0.00444 ( 151 of 34011 annotated genes )	6.031e-07	0.002823	Foxp1, Cav2, Fgfr2, Ilk, Hdac4, Igfbp3, Ttn, Tgfb1, Atg7, Cacna2d2, Actg1, Myog, Notch1, Mbnl3, Pitx2, Vegfa, Myh10, Nfatc3, Pik3r1, Ppp3ca, Homer1, Ep300, Gpx1, Utrn, Afg3l2, Bcl2, Kdm1a, Col4a1, Lrrk2, Lef1, Dicer1, Sik1, Tnnt2, Tpm1, Megf10,
GO:0045860	positive regulation of pr	0.01761 ( 59 of 3350 genes )	0.00938 ( 319 of 34011 annotated genes )	6.034e-07	0.002825	Hspa5, Raf1, Madd, Psen1, Iqgap1, Adam17, Ccnd2, Map2k2, Ccr7, Ilk, Tnik, Stk4, Sod1, Map3k5, Prkcd, Vapb, Cd81, Tgfb1, Ppp2ca, Npm1, Spag9, Pdpk1, Dab1, Pak2, Hsp90ab1, Vegfa, Psmd10, Csk, Map2k5, Pim1, Ghr, Frs2, Abi1, Tgfbr2, Pik3r6, Map4k1, Araf, Kiss1r, Mif, Dvl3, Dlg1, Lrrk2, Robld3, Ddr2, Lrp1, Cd4, Ccl5, Itgb3, Map4k2, Dgka, Agap2, Malt1, Ptprc, Gnai2, Map2k7, Nckap1l, Cspg4, Mapk8ip3, Ma…
GO:0002761	regulation of myeloid leu	0.00687 ( 23 of 3350 genes )	0.00229 ( 78 of 34011 annotated genes )	6.039e-07	0.002827	Inpp5d, Pik3r1, Rara, Clec2d, Gnas, Thoc5, Ndfip1, Id2, Ikzf1, Tesc, Runx1, Lef1, Mll5, Ccl5, Itgb3, Notch2, Lif, Nme2, Ogt, Clec2i, Tm7sf4, Tob2, Apc,
GO:0048598	embryonic morphogenesis	0.02567 ( 86 of 3350 genes )	0.01549 ( 527 of 34011 annotated genes )	6.129e-07	0.002869	Cfl1, Sp3, Aff3, Frzb, Fam48a, Psen1, Gnb2l1, Aldh1a3, Id2, Rgma, Tbx6, Setd2, Chd7, Ece1, Lrp6, Trp53, Ptk7, Pitx2, Tcf7, Nipbl, Rps6, Hectd1, Prkar1a, Frs2, Tgfbr2, Dync2h1, Smad4, Scrib, Dld, Fbn2, Hdac1, Dlg1, Rbpj, Wdr19, Trim28, Il10, Cul3, Neurod1, Paf1, Casp8, Vasp, Kat2a, Ldb1, Itga4, Zeb1, Tctn1, Stra6, Cdc73, Gnas, Fgfr2, Pbx2, Abr, Macf1, Gja5, Hipk1, Stk4, Sod1, Sox17, Smad2, Med12, …
GO:0006875	cellular metal ion homeos	0.01672 ( 56 of 3350 genes )	0.00876 ( 298 of 34011 annotated genes )	6.809e-07	0.003187	Immt, Cul5, Cd52, Prkcb, Plcd1, Atp2a1, Psen1, Cherp, Npy2r, Ndfip1, Ryr3, Atp2a2, Sod1, Slc30a1, Fis1, Tesc, Ireb2, Vapb, Aco1, Tgfb1, Cacna1c, Bax, Adcyap1r1, Lrp6, Il6st, Trpc2, S1pr1, Bcap31, Gna13, Cacna1a, Atp2c1, Kcnk3, Fkbp1a, Gnb1, Tfrc, P2rx4, Camk2d, Cxcl3, Bcl2, Trpm7, Dhrs7c, Itpr1, Diap1, Fth1, Lck, Ccl5, Itgb3, Abcb7, Fxn, Ptprc, Cacna1g, Mgea5, Dbi, Slc37a4, Gtf2i, Sypl2,
GO:0006310	DNA recombination	0.01104 ( 37 of 3350 genes )	0.00485 ( 165 of 34011 annotated genes )	6.975e-07	0.003265	Ino80, Smc5, Foxp3, Wrn, Recql, Ino80d, Foxp1, Smc1a, Bcl11b, Ndfip1, Ube2b, Msh5, Tgfb1, Ruvbl2, Obfc2a, Clcf1, Morf4l1, Nsmce2, Stat6, Brca1, Tcf7, Rnf168, Rad54l, Lig1, Prkdc, Xrn2, Lig4, Smc4, Apitd1, Lef1, Rad50, Paxip1, Hspd1, Smc6, Rag1, Ptprc, Lig3,
GO:0030837	negative regulation of ac	0.00418 ( 14 of 3350 genes )	0.00097 ( 33 of 34011 annotated genes )	7.212e-07	0.003376	Tmsb10, Rdx, Prkcd, Pfn1, Capzb, Spnb2, Capza1, Pfn2, Arfgef1, Add1, Tmod3, Tpm1, Spna2, Evl,
GO:0009206	purine ribonucleoside tri	0.00537 ( 18 of 3350 genes )	0.00153 ( 52 of 34011 annotated genes )	7.333e-07	0.003433	Atp1a1, Atp2c1, Atp2a1, Atp1b1, Atp5e, Atp2a2, Atp5b, Atp12a, Txndc3, Tgfb1, Ak3, Aldoa, Atp5a1, Ldhd, Atp5o, Nme2, Atp5g3, Atp5h,
GO:0016050	vesicle organization	0.00687 ( 23 of 3350 genes )	0.00232 ( 79 of 34011 annotated genes )	7.753e-07	0.003629	Si, Vps33b, Cadps, Ap3b1, Ap2b1, Wasl, Stxbp1, Dlg4, Cav2, Snapin, Mta1, 5730419I09Rik, Vamp8, Bcl2, Uso1, Picalm, Vti1a, Cul3, Rab8a, Coro1a, Gnai3, Stx5a, Cd2ap,
GO:0008610	lipid biosynthetic proces	0.02209 ( 74 of 3350 genes )	0.01282 ( 436 of 34011 annotated genes )	8.137e-07	0.003809	Hrh1, Prkaa1, Fabp5, Nsdhl, Hsd11b1, Agps, Samd8, Olah, Gba, Bmp5, St8sia1, 0610007P14Rik, Lta4h, Pigs, Tspo, Sh3glb1, Cdipt, Atp1a1, Tecr, Hmgcr, Alox5, Cds2, Agpat6, Pigk, Dbi, Gnpat, B4galt6, Agpat4, Tmem188, Lpcat1, Pi4k2a, Creb1, H2-Ke6, Igf1r, Dctn6, Pgap2, Dkk3, Aloxe3, Ept1, Glt25d1, Etnk1, Sod1, Fasn, Prkcd, Cd81, Apob, Scarb1, Scd1, Hmgcs1, Med1, Sptlc1, Brca1, Prkab1, Fads6, Lpcat4, Pi…
GO:0070085	glycosylation	0.00866 ( 29 of 3350 genes )	0.00338 ( 115 of 34011 annotated genes )	8.634e-07	0.004042	Man2a1, B3galnt2, Stt3b, B4galnt1, Psen1, Cog6, B4galt1, Uggt1, Entpd5, Arfgef1, St8sia6, B3gnt2, St6gal2, Npc1, Poglut1, Cds2, St3gal1, Alg12, Galnt1, Stt3a, St8sia1, Acer2, Alg13, St6gal1, Ogt, Oas2, Mgea5, Rpn2, Galnt3,
GO:0048025	negative regulation of nu	0.00239 ( 8 of 3350 genes )	0.00032 ( 11 of 34011 annotated genes )	8.688e-07	0.004067	U2af2, Srsf7, Srsf9, Sfswap, Srsf10, Npm1, Ptbp1, Hnrnpa2b1,
GO:0050686	negative regulation of mR	0.00239 ( 8 of 3350 genes )	0.00032 ( 11 of 34011 annotated genes )	8.688e-07	0.004067	U2af2, Srsf7, Srsf9, Sfswap, Srsf10, Npm1, Ptbp1, Hnrnpa2b1,
GO:0045621	positive regulation of ly	0.00597 ( 20 of 3350 genes )	0.00185 ( 63 of 34011 annotated genes )	8.818e-07	0.004128	Stat5b, Pcid2, Inpp5d, Foxp3, Ap3b1, Rara, Itpkb, Tgfbr2, Ccr7, Hsp90aa1, Ikzf1, Cd27, Il4ra, Lck, Zap70, Il15ra, Ptprc, Nckap1l, Il7r, Il2rg,
GO:0006082	organic acid metabolic pr	0.03164 ( 106 of 3350 genes )	0.02041 ( 694 of 34011 annotated genes )	8.862e-07	0.004148	Stat5b, Suclg1, Slc16a9, Pdxdc1, Prkaa1, Mat2a, Tars2, Gars, Rars2, St6gal2, Pdpr, Aldh1a3, Dnmt3a, Asl, Ldha, Apip, Olah, Dlst, Gad2, Aco1, Cars2, Atg7, Lta4h, Ido2, Dtd1, Qrsl1, Ass1, Sh3glb1, Apc, Mthfd1l, Mdh2, Iars, Mars, Gpx4, Gart, Akt2, Tecr, Gpx1, Alox5, Idh3g, Gsta1, Dld, Ogdh, Ddah2, Gpx3, Ddah1, Agpat6, Adipor2, Ddc, Dbi, Dnmt3b, Cs, Idh3b, Mat2b, Cmah, H2-Ke6, Aloxe3, Gsr, Nars, Cyp4…
GO:0051100	negative regulation of bi	0.01075 ( 36 of 3350 genes )	0.00470 ( 160 of 34011 annotated genes )	8.994e-07	0.00421	Trib2, Foxp3, Gsk3b, Irak2, Smad7, Nfkbid, Id2, Rsf1, Tax1bp1, Egln1, Arrb2, Hdac4, Ddit3, Sigirr, Spag9, Trim21, Bax, Flna, Usp7, Sp100, Psmd10, Rps3, Map2k5, Zcchc11, Pim1, Nlrc5, Trib1, Nlrc3, Park7, Kdm1a, Lef1, Rlim, Sik1, Hspa4, Cyld, Ptch1,
GO:0034762	regulation of transmembra	0.01701 ( 57 of 3350 genes )	0.00906 ( 308 of 34011 annotated genes )	9.09e-07	0.004255	Uaca, Tlr2, Vdac1, Kcnh8, Trpm4, Gsk3b, Ogg1, Trpm5, Kcnh1, Gpr89, Nalcn, Cherp, Hsp90aa1, Clic1, Slc30a1, Tesc, Clcn1, Trpv2, Tgfb1, Trim27, Cacna1c, Cacna2d2, Tpcn1, Kcnc2, Creb3, Med1, Hsp90ab1, Flna, Stim1, Psmd10, Homer1, Pde2a, Cacna1a, Ep300, Fkbp1a, Kcnk3, Scn1a, Emd, Slc9a3r1, Ripk1, Bcl2, Hk1, Tmem173, Smad4, Park7, Ahcyl1, Ubr5, Kcnj12, Sestd1, Cacna1g, Crbn, Kcnab2, Kcnq2, Kcns2, Hcn1…
GO:0015672	monovalent inorganic cati	0.01881 ( 63 of 3350 genes )	0.01038 ( 353 of 34011 annotated genes )	9.22e-07	0.004316	Slc12a7, Kcnh8, Trpm5, Kcnh1, Cox6c, Ywhah, Gnas, Nalcn, Slc20a1, Slc23a1, Atp6v0e, Slc17a7, Atp5b, Tesc, Slc12a6, Atp12a, Atp6v0a2, Tgfb1, Ikbkb, Slc9a8, Atp5a1, Uqcr11, Stk39, Atp5o, Atp5g3, Kcnc2, Atp1b3, Atp6v1d, Atp5h, Cdkn1b, Akt2, Atp1a1, Cox7c, Nedd4l, Kcnk3, Atp1b1, Scn1a, P2rx4, Atp5e, Camk2d, Slc9a3r1, Slc23a2, Park7, Atp6v1g1, Mif, Ahcyl1, Dlg1, Slc10a7, Atp6v1c1, Atp6v1e1, Sik1, Atp6…
GO:0051052	regulation of DNA metabol	0.01194 ( 40 of 3350 genes )	0.00550 ( 187 of 34011 annotated genes )	9.241e-07	0.004325	Ino80, Uimc1, Terf1, Tspyl2, Igf1r, Foxp3, Gsk3b, Smc3, Smc1a, Ndfip1, Dnmt3a, Ube2b, Kctd13, Tgfb1, Bmp5, Clcf1, Npm1, Pds5a, Stat6, Trp53, Brca1, Rnf168, Eya3, Parg, Rps3, Pfn1, Brcc3, Calr, Cst3, Stag2, Tinf2, Rad50, Paxip1, Trim28, Csf2, Pif1, Ptprc, Mgea5, Pcna, Lig3,
GO:0051091	positive regulation of tr	0.01045 ( 35 of 3350 genes )	0.00453 ( 154 of 34011 annotated genes )	9.873e-07	0.004621	Rhebl1, Itgb2, Tlr2, Rela, Prkcb, Irak2, Prdx3, Crebbp, Mtpn, Pten, Hdac4, Prkd2, Tgfb1, Ikbkb, Crtc3, Npm1, Lrp6, Vegfa, Sp100, Card11, Prkch, Ep300, Ube2v1, Rnf31, Epha5, Ripk1, Pycard, Kdm1a, Psma6, Ddr2, Il10, Neurod1, Malt1, Hmgn3, Ncoa3,
GO:0090047	positive regulation of tr	0.01045 ( 35 of 3350 genes )	0.00453 ( 154 of 34011 annotated genes )	9.873e-07	0.004621	Rhebl1, Itgb2, Tlr2, Rela, Prkcb, Irak2, Prdx3, Crebbp, Mtpn, Pten, Hdac4, Prkd2, Tgfb1, Ikbkb, Crtc3, Npm1, Lrp6, Vegfa, Sp100, Card11, Prkch, Ep300, Ube2v1, Rnf31, Epha5, Ripk1, Pycard, Kdm1a, Psma6, Ddr2, Il10, Neurod1, Malt1, Hmgn3, Ncoa3,
GO:0006084	acetyl-CoA metabolic proc	0.00478 ( 16 of 3350 genes )	0.00126 ( 43 of 34011 annotated genes )	9.884e-07	0.004626	Sdha, Suclg1, Mdh2, Aco2, Idh3g, Idh2, Dld, Pdha1, Ogdh, Acaa2, Dlst, Aco1, Pdha2, Sdhc, Cs, Idh3b,
GO:0006754	ATP biosynthetic process	0.00478 ( 16 of 3350 genes )	0.00126 ( 43 of 34011 annotated genes )	9.884e-07	0.004626	Atp1a1, Atp2c1, Atp2a1, Atp1b1, Atp5e, Atp2a2, Atp5b, Atp12a, Ak3, Tgfb1, Aldoa, Atp5a1, Ldhd, Atp5o, Atp5g3, Atp5h,
GO:0044255	cellular lipid metabolic	0.03075 ( 103 of 3350 genes )	0.01973 ( 671 of 34011 annotated genes )	9.968e-07	0.004666	Stat5b, Col4a3bp, Prkaa1, Fabp5, Pnpla6, Dgkd, Aldh1a3, Adh5, Samd8, Sacm1l, Olah, Gba, St8sia1, Sgpp2, Plcg1, Pik3c2b, Lta4h, Pigs, Il6st, Sh3glb1, Psap, Cdipt, Akt2, Pikfyve, Tecr, Hmgcr, Gpx1, Alox5, Dld, Retsat, Cds2, Smg1, Mtap7, Inpp4b, Agpat6, Adipor2, Pigk, Dbi, Pik3cd, Fig4, Gnpat, B4galt6, Agpat4, Inpp5d, Tmem188, Pi4k2a, Lpcat1, Inpp5f, H2-Ke6, Pgap2, Aloxe3, Ept1, Cyp4v3, Glt25d1, Etn…
GO:0010720	positive regulation of ce	0.01134 ( 38 of 3350 genes )	0.00512 ( 174 of 34011 annotated genes )	9.981e-07	0.004672	Rela, Vim, Anapc2, Ptpra, Ilk, Id2, 2400003C14Rik, Numb, Snw1, Trpv2, Tgfb1, Smad2, Ndel1, Clcf1, Pafah1b1, Actr3, Notch1, Cdh4, Rgs14, Tspo, Il6st, Vegfa, Sema4d, Caprin1, Prkch, Ep300, Lig4, Rtn4, Bcl2, Hdac1, Smad4, Mif, Lef1, Islr2, Lif, Fxn, Ntrk3, Stk24,
GO:0009145	purine nucleoside triphos	0.00537 ( 18 of 3350 genes )	0.00156 ( 53 of 34011 annotated genes )	1.012e-06	0.004735	Atp1a1, Atp2c1, Atp2a1, Atp1b1, Atp5e, Atp2a2, Atp5b, Atp12a, Txndc3, Tgfb1, Ak3, Aldoa, Atp5a1, Ldhd, Atp5o, Nme2, Atp5g3, Atp5h,
GO:0032504	multicellular organism re	0.02567 ( 86 of 3350 genes )	0.01570 ( 534 of 34011 annotated genes )	1.073e-06	0.00502	Usf2, Tyro3, Stat5b, Kdm3a, Prm2, Sp3, Rara, Wee2, Wbp7, Oas1d, Dnmt3a, Ube2b, Ube3a, Msh5, Sbf1, Hsf1, Rnf17, Adrbk1, Ubr2, Celf1, Herc4, Bik, Nr2c2, Gpx4, Aff4, Prkdc, Rps6, Krt9, Bcl2, Dld, Mtap7, Txndc3, Npy5r, Ggnbp2, Agpat6, Lif, Mcm9, Rad23b, Theg, Creb1, Pgm3, Clgn, Chuk, Gsr, Txnrd3, Sod1, 4932438A13Rik, Arrb2, Pten, Apob, Tgfb1, Sox17, Bat3, Pafah1b1, Ggn, Bax, Adcyap1r1, Prm3, Notch1, …
GO:0048609	multicellular organismal	0.02567 ( 86 of 3350 genes )	0.01570 ( 534 of 34011 annotated genes )	1.073e-06	0.00502	Usf2, Tyro3, Stat5b, Kdm3a, Prm2, Sp3, Rara, Wee2, Wbp7, Oas1d, Dnmt3a, Ube2b, Ube3a, Msh5, Sbf1, Hsf1, Rnf17, Adrbk1, Ubr2, Celf1, Herc4, Bik, Nr2c2, Gpx4, Aff4, Prkdc, Rps6, Krt9, Bcl2, Dld, Mtap7, Txndc3, Npy5r, Ggnbp2, Agpat6, Lif, Mcm9, Rad23b, Theg, Creb1, Pgm3, Clgn, Chuk, Gsr, Txnrd3, Sod1, 4932438A13Rik, Arrb2, Pten, Apob, Tgfb1, Sox17, Bat3, Pafah1b1, Ggn, Bax, Adcyap1r1, Prm3, Notch1, …
GO:0009628	response to abiotic stimu	0.02269 ( 76 of 3350 genes )	0.01338 ( 455 of 34011 annotated genes )	1.094e-06	0.005123	Uaca, Rfwd3, Ino80, Chek2, Prkaa1, Ercc3, Usp28, Usp47, Ube2b, Trp53bp2, Dynlrb1, Hsf1, St8sia1, Rgs14, Trp53, Rnf168, Rbbp7, Pde1b, Rad54l, Pik3r1, Pkn1, Pde2a, Prkdc, Nipbl, Gpx1, Hmgcr, Stat1, Foxp2, Bcl2, l7Rn6, Cds2, Mtap7, Paxip1, Hspa4, Ptprc, Lrp2, Vac14, Uimc1, Rela, Wrn, Ogg1, Stra6, Fam38a, Sod1, Clcn7, Arrb2, Mill2, Slc12a6, Trpv2, Casp9, Ruvbl2, Nox3, Obfc2a, Ercc5, Cacna1c, Pdpk1, T…
GO:0043123	positive regulation of I-	0.00806 ( 27 of 3350 genes )	0.00306 ( 104 of 34011 annotated genes )	1.102e-06	0.005158	Ppm1a, Rela, Irf3, Zc3hav1, Prkcb, Pdcd11, Chuk, Atp2c1, Ube2v1, Rnf31, Fkbp1a, Slc44a2, Slc20a1, Ndfip1, Lgals9, Bst2, Shisa5, Eef1d, Mier1, S100a13, Lgals1, BC031181, Zdhhc17, Malt1, Map3k14, Flna, Card11,
GO:0055080	cation homeostasis	0.02030 ( 68 of 3350 genes )	0.01156 ( 393 of 34011 annotated genes )	1.107e-06	0.005181	Immt, Cul5, Prkcb, Plcd1, Atp2a1, Psen1, Cherp, Npy2r, Atox1, Slc30a2, Atp2a2, Atp5b, Fis1, Tesc, Atp12a, Vapb, Aco1, Ppt1, Lrp6, Trp53, Il6st, Bcap31, Gna13, Bcl2, Dhrs7c, Itpr1, Diap1, Itgb3, Ccl5, Abcb7, Fxn, Ptprc, Mgea5, Dbi, Sypl2, Cd52, Gnas, Ndfip1, Ryr3, Slc30a1, Sod1, Sfxn3, Ireb2, Tgfb1, Slc9a8, Cacna1c, Trim24, Bax, Adcyap1r1, Neo1, Ccdc47, Trpc2, S1pr1, Cacna1a, Atp2c1, Fkbp1a, Kcnk3…
GO:0048024	regulation of nuclear mRN	0.00418 ( 14 of 3350 genes )	0.00100 ( 34 of 34011 annotated genes )	1.118e-06	0.005234	U2af2, Srsf7, Ddx5, Srsf9, Sfswap, Rbmy1a1, Srsf10, Mbnl1, Npm1, Rbm25, Ptbp1, Hnrnpa2b1, D11Bwg0517e, Rbm5,
GO:0000075	cell cycle checkpoint	0.00925 ( 31 of 3350 genes )	0.00379 ( 129 of 34011 annotated genes )	1.138e-06	0.005326	Rfwd3, Pcid2, Foxo4, Chek2, Wac, Uimc1, Terf1, Ercc3, Mapkapk2, 3200002M19Rik, Usp28, Rps6, Brcc3, Smc1a, Ptprv, Chfr, Bub3, Cep192, Tgfb1, Obfc2a, Hsf1, Rpl24, Casp2, Csnk2a1, Ndrg1, Trp53, Brca1, Mapk14, Ppp2r5c, Mad2l1, Apc,
GO:0006352	transcription initiation,	0.00597 ( 20 of 3350 genes )	0.00188 ( 64 of 34011 annotated genes )	1.168e-06	0.005467	Med14, Creb1, Gtf2e1, Bclaf1, Med13, Gtf2e2, Rrn3, Tbpl2, Rsf1, Tbp, Apitd1, Atf7ip, Gtf2a1l, Paxip1, Taf1, Cand1, Med12, Gtf2a1, Gtf2f1, Med1,
GO:0071496	cellular response to exte	0.00985 ( 33 of 3350 genes )	0.00418 ( 142 of 34011 annotated genes )	1.172e-06	0.005487	Usf2, Hspa5, Prkaa1, Wrn, Rara, Ctsd, Psen1, Atg13, Npc1, Atg16l1, Ldha, Tesc, Snw1, Tnrc6a, Mll5, Fos, Atg7, Trim24, Add1, Med1, Trp53, Ptk7, Supt5h, Wac, Pde2a, Srebf1, Cnn2, Gsdmd, Itga6, Ogt, Larp1, Ncoa1, Ret,
GO:0045087	innate immune response	0.01582 ( 53 of 3350 genes )	0.00826 ( 281 of 34011 annotated genes )	1.189e-06	0.005564	Tyro3, Stat5b, Tlr2, Rela, Irf3, Mapkapk2, Pcbp2, Polr3a, C1qb, C4bp, Ptpn6, Map3k5, Cd86, Arrb2, C8a, Irgm2, Tgfb1, Rab27a, Sigirr, Pdpk1, Polr3f, Cnpy3, Cr1l, Med1, Il12rb1, Cdc37, Sp100, C3, Il18r1, Masp2, Tap1, Clec2d, Nlrc5, Stat1, Bst2, Tmem173, Dusp10, Sp110, Pycard, Polr3c, Akirin2, Mif, Pvr, Il1rl2, Hspd1, Ccl5, Trim30a, Samhd1, Map4k2, Cyba, Oas2, Pik3cd, Tbk1,
GO:0010959	regulation of metal ion t	0.01164 ( 39 of 3350 genes )	0.00535 ( 182 of 34011 annotated genes )	1.198e-06	0.00561	Ywhah, Gnas, Slc30a1, Tesc, Arrb2, Trpv2, Tgfb1, Ikbkb, Trim27, Stk39, Cacna1c, Cacna2d2, Bax, Adcyap1r1, Creb3, Tspo, Stim1, Akt2, Atp1a1, Homer1, Cacna1a, Nedd4l, Fkbp1a, Camk2d, P2rx4, Slc9a3r1, Bcl2, Dhrs7c, Ahcyl1, Mif, Dlg1, Itpr1, Diap1, Sik1, Ccl5, Sestd1, Cacna1g, Mgea5, Dbi,
GO:0080135	regulation of cellular re	0.01373 ( 46 of 3350 genes )	0.00679 ( 231 of 34011 annotated genes )	1.256e-06	0.005879	Uimc1, Map4k4, Igf1r, Igbp1, Map2k2, Foxo1, Ccr7, Npc1, Ndel1, Atg7, Pafah1b1, Npm1, Spag9, Cops5, Brca1, Supt5h, Rnf168, Eya3, Psmd10, Rps3, Parg, Wac, Akt2, Brcc3, Hmgcr, Zmynd11, Rtn4, Dusp10, Zfp622, Cd27, Mif, Kdm1a, Dvl3, Ddx5, Zfp110, Ncor1, Trim28, Setd8, Map4k2, Ntrk3, Cdc42se1, Map2k7, Larp1, Stk24, Mapk8ip3, Magi3,
GO:0033674	positive regulation of ki	0.01821 ( 61 of 3350 genes )	0.01003 ( 341 of 34011 annotated genes )	1.257e-06	0.005884	Hspa5, Raf1, Madd, Psen1, Iqgap1, Adam17, Ccnd2, Map2k2, Ccr7, Ilk, Tnik, Stk4, Sod1, Map3k5, Prkcd, Vapb, Cd81, Tgfb1, Ppp2ca, Npm1, Spag9, Pdpk1, Dab1, Pak2, Hsp90ab1, Vegfa, Psmd10, Csk, Map2k5, Pim1, Ghr, Frs2, Abi1, Tgfbr2, Pik3r6, Map4k1, Araf, Kiss1r, Zfp622, Mif, Dvl3, Dlg1, Lrrk2, Robld3, Rad50, Ddr2, Lrp1, Cd4, Ccl5, Itgb3, Map4k2, Dgka, Agap2, Malt1, Ptprc, Gnai2, Map2k7, Nckap1l, Cspg…
GO:0015992	proton transport	0.00687 ( 23 of 3350 genes )	0.00238 ( 81 of 34011 annotated genes )	1.258e-06	0.005891	Cox7c, Cox6c, Atp5e, Slc9a3r1, Park7, Atp6v1g1, Atp6v0e, Atp5b, Tesc, Atp12a, Atp6v0a2, Atp6v1c1, Atp6v1e1, Atp6ap1, Slc9a8, Atp5a1, Uqcr11, Atp5o, Atp5g3, Atp6v1d, Nhedc2, Atp6v0b, Atp5h,
GO:0021549	cerebellum development	0.00567 ( 19 of 3350 genes )	0.00173 ( 59 of 34011 annotated genes )	1.288e-06	0.00603	Myh10, Nr2c2, Hspa5, Rfx4, Ldb1, Ptprs, Foxp3, Cacna1a, Foxp2, Cntn1, Ezh2, Gas1, Agtpbp1, Sdf4, Atg7, Dab1, Neurod1, Lrp6, Gnpat,
GO:0002709	regulation of T cell medi	0.00448 ( 15 of 3350 genes )	0.00115 ( 39 of 34011 annotated genes )	1.315e-06	0.006154	H2-D1, Pvr, B2m, Trpm4, Foxp3, Hspd1, H2-K1, Tap1, Malt1, Ptprc, Il20rb, Ppp3cb, H2-T23, Il7r, Spn,
GO:0018108	peptidyl-tyrosine phospho	0.01134 ( 38 of 3350 genes )	0.00517 ( 176 of 34011 annotated genes )	1.343e-06	0.006286	Itgb2, Clk1, Fgfr2, Ptpn6, Prkcd, Arrb2, Cd81, Hcls1, Cd3e, Pecam1, Clcf1, Jak1, Pak2, Il12rb1, Trp53, Il6st, Vegfa, Tnfrsf14, Sema4d, Rictor, Fyn, Ghr, Abi1, Hk1, Mif, Clk4, Ddr2, Tnk2, Cd4, Ccl5, Itgb3, Lck, Zap70, Lif, Csf2, Ptprc, Cspg4, Samsn1,
GO:0018212	peptidyl-tyrosine modific	0.01134 ( 38 of 3350 genes )	0.00517 ( 176 of 34011 annotated genes )	1.343e-06	0.006286	Itgb2, Clk1, Fgfr2, Ptpn6, Prkcd, Arrb2, Cd81, Hcls1, Cd3e, Pecam1, Clcf1, Jak1, Pak2, Il12rb1, Trp53, Il6st, Vegfa, Tnfrsf14, Sema4d, Rictor, Fyn, Ghr, Abi1, Hk1, Mif, Clk4, Ddr2, Tnk2, Cd4, Ccl5, Itgb3, Lck, Zap70, Lif, Csf2, Ptprc, Cspg4, Samsn1,
GO:0022415	viral reproductive proces	0.00806 ( 27 of 3350 genes )	0.00309 ( 105 of 34011 annotated genes )	1.349e-06	0.006316	Pfn1, Bat1a, Srpk2, Tap1, Ep300, Cul1, Hcfc1, Thoc5, Ripk1, Rsf1, Hdac1, Srpk1, Etf1, Ddx5, Vapb, Lef1, Dicer1, Tgfb1, Ccl5, Cd4, Tardbp, Creb3, Hbxip, Ifnb1, Thoc1, Sp100, Ppia,
GO:0002706	regulation of lymphocyte	0.00746 ( 25 of 3350 genes )	0.00273 ( 93 of 34011 annotated genes )	1.357e-06	0.006353	Stat5b, H2-D1, C3, B2m, Trpm4, Foxp3, H2-K1, Tap1, Clec2d, Ndfip1, Spn, Ptpn6, Pvr, Arrb2, Tgfb1, Paxip1, Clcf1, Hspd1, Malt1, Ptprc, Il20rb, H2-T23, Ppp3cb, Stat6, Il7r,
GO:0009201	ribonucleoside triphospha	0.00537 ( 18 of 3350 genes )	0.00159 ( 54 of 34011 annotated genes )	1.382e-06	0.00647	Atp1a1, Atp2c1, Atp2a1, Atp1b1, Atp5e, Atp2a2, Atp5b, Atp12a, Txndc3, Tgfb1, Ak3, Aldoa, Atp5a1, Ldhd, Atp5o, Nme2, Atp5g3, Atp5h,
GO:0050769	positive regulation of ne	0.00985 ( 33 of 3350 genes )	0.00420 ( 143 of 34011 annotated genes )	1.385e-06	0.006485	Rela, Vim, Anapc2, Ptpra, Ilk, Id2, 2400003C14Rik, Numb, Snw1, Trpv2, Ndel1, Clcf1, Pafah1b1, Actr3, Notch1, Cdh4, Rgs14, Tspo, Il6st, Vegfa, Sema4d, Caprin1, Prkch, Ep300, Lig4, Rtn4, Hdac1, Mif, Islr2, Lif, Fxn, Ntrk3, Stk24,
GO:0040017	positive regulation of lo	0.01403 ( 47 of 3350 genes )	0.00703 ( 239 of 34011 annotated genes )	1.401e-06	0.006558	Tlr2, Phpt1, Igf1r, Ets1, Adam17, Ccl21a, Map2k2, Ccr7, Adora3, Gnb2l1, Ilk, Ccl11, Prkd2, Tgfb1, Rapgef4, Pecam1, Il16, Bves, Spag9, Plcg1, Creb3, Notch1, Amotl1, Ptp4a1, Trp53, Il6st, Vegfa, Sema4d, Apc, Sell, S1pr1, Akt2, Pik3r1, Tgfbr2, Bcl2, Mif, Diap1, Ddr2, Lef1, 1810046J19Rik, Ccl5, Itgb3, Coro1a, Ptprc, Nckap1l, Hbegf, Ret,
GO:0060560	developmental growth invo	0.00896 ( 30 of 3350 genes )	0.00365 ( 124 of 34011 annotated genes )	1.446e-06	0.00677	Rara, Ep300, Anapc2, Arhgap4, Fgfr2, Rtn4, Spg20, Ilk, 2400003C14Rik, Ccl11, Ddr2, Trpv2, Tgfb1, Ndel1, Trim28, Islr2, Med12, Pafah1b1, Tcfap2c, Ntrk3, Fxn, Sema3a, Barhl2, Cdh4, Notch1, Lrp6, Med1, Ptk7, Por, Sema4d,
GO:0002698	negative regulation of im	0.00597 ( 20 of 3350 genes )	0.00191 ( 65 of 34011 annotated genes )	1.536e-06	0.00719	Irf3, Foxp3, Tap1, Clec2d, Pcbp2, Abr, Ndfip1, Spn, Dusp10, Ptpn6, Arrb2, Mill2, Tgfb1, Il4ra, Il20rb, Ptprc, Cr1l, Ppp3cb, Il7r, Bcr,
GO:0032508	DNA duplex unwinding	0.00328 ( 11 of 3350 genes )	0.00065 ( 22 of 34011 annotated genes )	1.538e-06	0.007201	Ino80, Ddx1, Chd8, Rad50, Ercc3, Ruvbl2, Wrn, Recql, Mcm6, Ascc3, Mcm4,
GO:0031668	cellular response to extr	0.00925 ( 31 of 3350 genes )	0.00385 ( 131 of 34011 annotated genes )	1.618e-06	0.007574	Usf2, Wac, Hspa5, Prkaa1, Wrn, Rara, Ctsd, Psen1, Srebf1, Atg13, Npc1, Atg16l1, Ldha, Gsdmd, Tesc, Snw1, Tnrc6a, Mll5, Fos, Atg7, Trim24, Itga6, Ogt, Add1, Larp1, Med1, Ncoa1, Trp53, Ptk7, Supt5h, Ret,
GO:0032844	regulation of homeostatic	0.01343 ( 45 of 3350 genes )	0.00664 ( 226 of 34011 annotated genes )	1.633e-06	0.007646	Stat5b, Inpp5d, Terf1, Ldb1, Rara, Ets1, Smad7, Dlg4, Adam17, Cherp, Gja5, Id2, Slc30a2, Pten, Tgfb1, Bax, Adcyap1r1, Lrp6, Tspo, Tm7sf4, Vegfa, Csk, Fkbp1a, Tfrc, P2rx4, Bcl2, Dhrs7c, Mif, Itpr1, Kdm1a, Tinf2, Diap1, Dicer1, Ccl5, Itgb3, Lck, Neurod1, Ypel1, Ptprc, Cacna1g, Pif1, Mgea5, Nckap1l, Dbi, Mapk14,
GO:0009791	post-embryonic developmen	0.00806 ( 27 of 3350 genes )	0.00312 ( 106 of 34011 annotated genes )	1.647e-06	0.007709	Plekha1, Foxp3, Psen1, Gnas, Fgfr2, Bcl11b, Foxp2, Bcl2, Asl, Itpr1, Ireb2, Aco1, Sepp1, Apob, Dicer1, Smad2, Atg7, Acadm, Tiparp, Bax, Gigyf2, Ddx17, Slc37a4, Ccdc47, Vegfa, Mapk8ip3, Morc3,
GO:0070201	regulation of establishme	0.01582 ( 53 of 3350 genes )	0.00835 ( 284 of 34011 annotated genes )	1.659e-06	0.007767	Uaca, Tlr2, Irf3, Uhmk1, Rph3al, Foxp3, Gsk3b, Ogg1, Lats1, Appl1, Vamp4, Cherp, Ccr7, Ndfip1, Gnb2l1, Hsp90aa1, Xpo1, Cep192, Tgfb1, Casp1, A930001N09Rik, Il4ra, Pdpk1, Creb3, Med1, Hsp90ab1, Flna, Psmd10, Exoc4, Csk, Dnm1l, Nedd1, Pde2a, Ep300, Emd, Gapvd1, Tmem173, Smad4, Pycard, Dnajc1, Mif, Ubr5, Picalm, Rbm22, Lcp1, Lrp1, Rab8a, Il10, Sorbs1, Cyld, Kcnn4, Mapk14, AF251705,
GO:0002449	lymphocyte mediated immun	0.01075 ( 36 of 3350 genes )	0.00482 ( 164 of 34011 annotated genes )	1.672e-06	0.007825	Stat5b, Inpp5d, Trpm4, Foxp3, Ndfip1, C1qb, Spn, C4bp, Ptpn6, Prkcd, Arrb2, C8a, Tgfb1, Rab27a, Clcf1, Cr1l, Ppp3cb, H2-T23, Stat6, Il7r, Rnf168, H2-D1, B2m, C3, Masp2, H2-K1, Tap1, Clec2d, Lig4, Dlg1, Pvr, Paxip1, Hspd1, Malt1, Il20rb, Ptprc,
GO:0007568	aging	0.00776 ( 26 of 3350 genes )	0.00294 ( 100 of 34011 annotated genes )	1.678e-06	0.007853	Inpp5d, Terf1, Smc5, Wrn, Calr, Sin3a, Mnt, Bcl2, Id2, Ilk, Pdcd4, Sod1, Mif, Lrrk2, Prkcd, Pten, Zfp217, Smc6, Npm1, Ercc5, Nsmce2, Xrn1, Polg, Trp53, Mapk14, Morc3,
GO:0022411	cellular component disass	0.00955 ( 32 of 3350 genes )	0.00406 ( 138 of 34011 annotated genes )	1.778e-06	0.008322	Ict1, Cfl1, Acin1, Baz1b, Nedd1, Ets1, Spnb2, Capza1, Ndufa13, Vrk1, Sbds, Etf1, Sod1, Evl, Rdx, Ddr2, Ndel1, Capzb, Pafah1b1, Arid1a, Ppt1, Kif5b, Bax, Mgea5, Add1, Smarcc2, Fap, Tmod3, Tpm1, Spna2, Eif5a, Apc,
GO:0001934	positive regulation of pr	0.01463 ( 49 of 3350 genes )	0.00753 ( 256 of 34011 annotated genes )	1.909e-06	0.008937	Raf1, Gsk3b, Lats1, Psen1, Gnas, Adam17, Ccnd2, Gnb2l1, Csnk1d, Rgma, Arrb2, Cd81, Hcls1, Tgfb1, Bmp5, Cd3e, Sqstm1, Pecam1, Clcf1, Pak2, Trp53, Il6st, Vegfa, Tnfrsf14, Sema4d, Rictor, Cd6, Akt2, Pik3r1, Ep300, Ghr, Bcl2, Araf, Smad4, Mif, Dvl3, Lrrk2, Rad50, Braf, Tnk2, Cd4, Ccl5, Itgb3, Lck, Phip, Lif, Csf2, Rap2c, Cspg4,
GO:0000060	protein import into nucle	0.00448 ( 15 of 3350 genes )	0.00118 ( 40 of 34011 annotated genes )	1.918e-06	0.008977	Ubr5, Rbm22, Tgfb1, Arntl, Pde2a, Pola2, Ogg1, Ep300, Cep57, Oprd1, Hsp90aa1, Hsp90ab1, Med1, Trp53, Tmem173,
GO:0033673	negative regulation of ki	0.00985 ( 33 of 3350 genes )	0.00426 ( 145 of 34011 annotated genes )	1.923e-06	0.009002	Pik3ip1, Igf1r, Gsk3b, Lats1, Psen1, Prdx3, Gnb2l1, Ilk, Ptpn6, Prkcd, Pten, Dusp19, Gba, Trim27, Pdpk1, Kat2b, Rgs14, Lrp6, Dusp1, Dnajc3, Apc, Lax1, Cdkn1b, Csk, Hmgcr, Trib1, Wnk1, Rgs2, Dusp10, Dusp7, Dbndd2, Stk38, Ptprc,
GO:0051347	positive regulation of tr	0.01851 ( 62 of 3350 genes )	0.01038 ( 353 of 34011 annotated genes )	1.941e-06	0.009087	Hspa5, Raf1, Madd, Psen1, Iqgap1, Adam17, Ccnd2, Map2k2, Ccr7, Ilk, Tnik, Stk4, Sod1, Map3k5, Prkcd, Vapb, Cd81, Tgfb1, Ppp2ca, Npm1, Spag9, Pdpk1, Dab1, Pak2, Hsp90ab1, Vegfa, Psmd10, Csk, Map2k5, Pim1, Ghr, Frs2, Abi1, Tgfbr2, Pik3r6, Map4k1, Araf, Kiss1r, Zfp622, Mif, Dvl3, Dlg1, Lrrk2, Robld3, Rad50, Ddr2, Lrp1, Cd4, Ccl5, Itgb3, Map4k2, Dgka, Agap2, Fxn, Malt1, Ptprc, Map2k7, Gnai2, Nckap1l,…
GO:0002456	T cell mediated immunity	0.00507 ( 17 of 3350 genes )	0.00147 ( 50 of 34011 annotated genes )	1.976e-06	0.009251	H2-D1, B2m, Trpm4, Foxp3, H2-K1, Tap1, Spn, Dlg1, Pvr, Rab27a, Hspd1, Malt1, Il20rb, Ptprc, H2-T23, Ppp3cb, Il7r,
GO:0045793	positive regulation of ce	0.00806 ( 27 of 3350 genes )	0.00315 ( 107 of 34011 annotated genes )	2.004e-06	0.009379	Ino80, Map2k5, Ep300, Adam17, Anapc2, Bcl2, Ilk, Hsp90aa1, 2400003C14Rik, Usp47, Mtpn, Lef1, Trpv2, Ndel1, Islr2, Pafah1b1, Ntrk3, Fxn, Nol8, Cyba, Ncoa3, Cdh4, Hbegf, Hsp90ab1, Derl2, Sema4d, Psmd10,
GO:0043154	negative regulation of ca	0.00597 ( 20 of 3350 genes )	0.00194 ( 66 of 34011 annotated genes )	2.007e-06	0.009393	Hspa5, Map2k5, Akt2, Igbp1, Gpx1, Prdx3, Cflar, Nr4a1, Usp47, Cd27, Gpi1, Lef1, Csnk2a1, Rag1, Ptma, Rps6ka1, Hbxip, Por, Vegfa, Ints1,
GO:0000209	protein polyubiquitinatio	0.00746 ( 25 of 3350 genes )	0.00279 ( 95 of 34011 annotated genes )	2.077e-06	0.009723	Amfr, Ppil2, Rnf111, Ube2d3, Stub1, Ube2v1, Rnf31, Znrf1, Ttc3, Rnf41, Chfr, Bcl2, Cdc34, Rnf167, Ube2b, Huwe1, Ubr5, Ube3a, Rnf20, Trim21, Ube2h, Rnf4, Ube2k, Brca1, Rnf168,
GO:0034097	response to cytokine stim	0.01701 ( 57 of 3350 genes )	0.00929 ( 316 of 34011 annotated genes )	2.107e-06	0.009865	Stat5b, Rela, Casp8, Igbp1, Aff3, Irak2, Zc3h15, Ccr7, Hipk1, Tgtp1, Ptpn6, Irgm2, Gba, Hdac4, Sh2b2, Sigirr, Pafah1b1, Jak1, Pggt1b, Ppp3cb, Stat6, Med1, Il12rb1, Tm7sf4, Il6st, Tcf7, Cdc37, Sp100, Duox1, Map2k5, Il10rb, Zcchc11, Fkbp1a, Ghr, Nlrc5, Il17ra, Stat1, Ctrb1, Ripk1, Bcl2, Il21r, Tmem173, Pycard, Ccrl2, Ifi203, Ifnar1, Rqcd1, Klf6, Lef1, 5730403B10Rik, Il1rl2, Il2rb, Ccl5, Coro1a, Fnt…
GO:0032784	regulation of transcripti	0.00388 ( 13 of 3350 genes )	0.00091 ( 31 of 34011 annotated genes )	2.113e-06	0.009893	Whsc2, Rdbp, Ezh2, Ldb1, Supt4h1, Cdc73, Tcea2, Paf1, Brd4, Leo1, Thoc1, Supt5h, Supt6h,
GO:0051272	positive regulation of ce	0.01373 ( 46 of 3350 genes )	0.00694 ( 236 of 34011 annotated genes )	2.322e-06	0.01087	Stat5b, Tlr2, Phpt1, Igf1r, Ets1, Adam17, Map2k2, Ccr7, Adora3, Gnb2l1, Ilk, Ccl11, Prkd2, Tgfb1, Rapgef4, Pecam1, Spag9, Plcg1, Creb3, Notch1, Amotl1, Ptp4a1, Trp53, Il6st, Vegfa, Sema4d, Apc, Sell, S1pr1, Akt2, Pik3r1, Tgfbr2, Bcl2, Mif, Diap1, Ddr2, Lef1, 1810046J19Rik, Ccl5, Itgb3, Coro1a, Ptprc, Nckap1l, Actn4, Hbegf, Ret,
GO:0051170	nuclear import	0.01194 ( 40 of 3350 genes )	0.00570 ( 194 of 34011 annotated genes )	2.451e-06	0.01147	Uaca, Snupn, Cfl1, Tlr2, Arntl, Gsk3b, Ogg1, Tnpo3, Spnb2, Cherp, Nup155, Hsp90aa1, Hnrnpa1, Nop58, Tgfb1, Creb3, Med1, Flna, Hsp90ab1, Trp53, Kpna6, Psmd10, Pik3r1, Ppp3ca, Pde2a, Ep300, Pola2, Emd, Oprd1, l7Rn6, Tmem173, Smad4, Ubr5, Kpnb1, Rbm22, Ing1, Cep57, Phip, Mapk14, Cyld,
GO:0048863	stem cell differentiation	0.00955 ( 32 of 3350 genes )	0.00412 ( 140 of 34011 annotated genes )	2.475e-06	0.01159	Med15, Med14, Ldb1, Zhx2, Zcchc11, Nipbl, Smc3, Pax7, Cdc73, Smc1a, Tcf7l1, Msi2, Lig4, Crebbp, Leo1, Stag2, Setd2, Jarid2, Med28, Rbpj, Dicer1, Sox17, Med12, Tcfap2c, Lif, Ptprc, Paf1, Gpm6a, Myst3, Sall4, Apc, Megf10,
GO:0016577	histone demethylation	0.00299 ( 10 of 3350 genes )	0.00056 ( 19 of 34011 annotated genes )	2.555e-06	0.01196	Kdm5c, Kdm1a, Kdm3a, Kdm4c, Phf8, Kdm5b, Kdm2a, Kdm5d, Ube2b, Jhdm1d,
GO:0001824	blastocyst development	0.00597 ( 20 of 3350 genes )	0.00197 ( 67 of 34011 annotated genes )	2.605e-06	0.01219	Sp3, Atp1b1, Brd4, Cdk11b, Sbds, Nasp, Psmc3, Sox17, Ndel1, Capn2, Cul3, Tcfap2c, Psmc4, Xab2, Hbegf, N4bp2l2, Gins1, Dad1, Sall4, Ints1,
GO:0017038	protein import	0.01373 ( 46 of 3350 genes )	0.00697 ( 237 of 34011 annotated genes )	2.618e-06	0.01226	Uaca, Snupn, Cfl1, Tlr2, Arntl, Gsk3b, Ogg1, Tnpo3, Spnb2, Rab8b, Cherp, Nup155, Hsp90aa1, Nop58, Tgfb1, Tomm20, Creb3, Med1, Flna, Hsp90ab1, Trp53, Kpna6, Psmd10, Mff, Pik3r1, Ppp3ca, Pde2a, Ep300, Pola2, Emd, Oprd1, l7Rn6, Tmem173, Smad4, Ubr5, Rbm22, Kpnb1, Pex6, Ing1, Cep57, Hspa4, Phip, Samm50, Mapk14, Cyld, Lrp2,
GO:0009991	response to extracellular	0.01343 ( 45 of 3350 genes )	0.00676 ( 230 of 34011 annotated genes )	2.676e-06	0.01253	Usf2, Hspa5, Prkaa1, Wrn, Rara, Ctsd, Psen1, Atg13, Npc1, Atg16l1, Sod1, Ldha, Tesc, Mill2, Snw1, Tnrc6a, Suox, Mll5, Cd3e, Fos, Gdap2, Scamp3, Atg7, Trim24, Add1, Med1, Lrp6, Trp53, Ptk7, Supt5h, Sp100, Wac, Stat1, Srebf1, Aqp3, Gsdmd, Mtap7, Runx1, Acer2, Acadm, Itga6, Ogt, Larp1, Ncoa1, Ret,
GO:0071845	cellular component disass	0.00925 ( 31 of 3350 genes )	0.00394 ( 134 of 34011 annotated genes )	2.697e-06	0.01262	Ict1, Cfl1, Acin1, Baz1b, Nedd1, Ets1, Spnb2, Capza1, Ndufa13, Vrk1, Sbds, Etf1, Sod1, Evl, Rdx, Ddr2, Ndel1, Capzb, Pafah1b1, Arid1a, Ppt1, Kif5b, Bax, Add1, Smarcc2, Fap, Tmod3, Tpm1, Spna2, Eif5a, Apc,
GO:0019318	hexose metabolic process	0.01254 ( 42 of 3350 genes )	0.00615 ( 209 of 34011 annotated genes )	2.791e-06	0.01306	Arpp19, Prkaa1, Pgm3, Fabp5, Taldo1, Hsd11b1, Entpd5, Foxo1, Ldha, Gpi1, Tsta3, Hdac4, Igfbp3, Ugp2, Aldoa, Pfkp, Man2c1, Pdha2, Man2a1, Man2a2, Akt2, Pik3r1, Chst15, Cacna1a, B4galt1, Ppp1cb, Hk1, Man2b1, Ogdh, Pdha1, Ppp1ca, Mif, G6pc3, Pdk1, Sik1, Ppp1r3b, Ncor1, Acadm, Sorbs1, Glyr1, Mapk14, Pgam1,
GO:0031123	RNA 3'-end processing	0.00478 ( 16 of 3350 genes )	0.00135 ( 46 of 34011 annotated genes )	2.798e-06	0.0131	Eri1, Nudt21, Cpsf3, Zcchc11, Cdc73, Papolg, Leo1, Rpsa, Ahcyl1, Cpsf6, Zcchc6, Rps21, Paf1, Fip1l1, Pabpn1, Ints1,
GO:0048813	dendrite morphogenesis	0.00627 ( 21 of 3350 genes )	0.00215 ( 73 of 34011 annotated genes )	2.861e-06	0.01339	Syne1, Caprin1, Gsk3b, Fyn, Cacna1a, Dlg4, Ywhah, Anapc2, Epha5, Ngef, Ilk, Tnik, Kidins220, Picalm, Lrrk2, Numb, Pten, Actr3, Sipa1l1, Sema3a, Sema4d,
GO:0031669	cellular response to nutr	0.00806 ( 27 of 3350 genes )	0.00320 ( 109 of 34011 annotated genes )	2.938e-06	0.01375	Usf2, Wac, Hspa5, Prkaa1, Wrn, Rara, Ctsd, Psen1, Srebf1, Atg13, Npc1, Atg16l1, Tesc, Snw1, Tnrc6a, Mll5, Atg7, Trim24, Ogt, Add1, Larp1, Med1, Ncoa1, Trp53, Ptk7, Supt5h, Ret,
GO:0045639	positive regulation of my	0.00567 ( 19 of 3350 genes )	0.00182 ( 62 of 34011 annotated genes )	2.982e-06	0.01396	Inpp5d, Ets1, Gnas, Id2, Ikzf1, Kdm1a, Tesc, Runx1, Lef1, Rcor1, Mll5, Ccl5, Itgb3, Notch2, Lif, Ogt, Nckap1l, Tm7sf4, Mapk14,
GO:0007169	transmembrane receptor pr	0.01910 ( 64 of 3350 genes )	0.01097 ( 373 of 34011 annotated genes )	3.007e-06	0.01407	Stat5b, Cilp, Rela, Raf1, Prkcb, Igf1r, Rab7, Mapkapk2, Atxn7, Psen1, Adam17, Fgfr2, Foxo1, Ptpra, Ngef, Prkcd, Gigyf1, Pten, Ybx1, Prkd2, Lat, Igfbp3, Tgfb1, Sh2b2, Bmp5, Fgf17, Ppp2r5d, Eif4ebp1, Sipa1l1, Rab14, Rgs14, Flna, Clec2i, Bcr, Vegfa, Foxo4, Akt2, Pik3r1, Plekha1, Cacna1a, Ghr, Frs2, Srebf1, Slc9a3r1, Epha5, Ddr2, Myof, Zfp106, Wdr19, Cep57, Rapgef1, Ntrk3, Phip, Tiparp, Dlg2, Ogt, St…
GO:0002822	regulation of adaptive im	0.00746 ( 25 of 3350 genes )	0.00285 ( 97 of 34011 annotated genes )	3.132e-06	0.01466	H2-D1, C3, B2m, Trpm4, Foxp3, H2-K1, Tap1, Ccr7, Ndfip1, Spn, Ptpn6, Pvr, Tgfb1, Paxip1, Clcf1, Hspd1, Il4ra, Malt1, Ptprc, Il20rb, Ppp3cb, H2-T23, Stat6, Il12rb1, Il7r,
GO:0006898	receptor-mediated endocyt	0.00746 ( 25 of 3350 genes )	0.00285 ( 97 of 34011 annotated genes )	3.132e-06	0.01466	Dnm2, Syne1, Hnrnpk, Calcrl, Ghr, Dlg4, Tgfbr2, Ccr7, Cltc, Scyl2, Atp5b, Picalm, Arrb2, Snx9, Lrp1, Atad1, Gtf2h2, Ppt1, Adrbk1, Cd2ap, Gria1, Lrp6, Vegfa, Lrp2, Sgip1,
GO:0009109	coenzyme catabolic proces	0.00388 ( 13 of 3350 genes )	0.00094 ( 32 of 34011 annotated genes )	3.248e-06	0.0152	Sdha, Suclg1, Mdh2, Dlst, Ncf2, Aco1, Aco2, Sdhc, Idh2, Idh3g, Ogdh, Cs, Idh3b,
GO:0051186	cofactor metabolic proces	0.01373 ( 46 of 3350 genes )	0.00703 ( 239 of 34011 annotated genes )	3.317e-06	0.01553	Mat2b, Suclg1, Pcbd2, Mat2a, Taldo1, Atic, Hsd11b1, Ldha, 4932438A13Rik, Acaa2, Acadsb, Ireb2, Dlst, Aco1, Mocos, Ppt1, Sdhc, Pdha2, Fdx1, Sdha, Mthfd1l, Mdh2, Gart, Aco2, Cox10, Ciao1, Slc25a39, Hmgcr, Hscb, Idh2, Idh3g, Dld, Pdha1, Ogdh, Dnmt1, Ncf2, Txnrd1, Agpat6, Fxn, Pank3, Pgam1, Glyr1, Dgat1, Cs, Ces1d, Idh3b,
GO:0009142	nucleoside triphosphate b	0.00537 ( 18 of 3350 genes )	0.00168 ( 57 of 34011 annotated genes )	3.345e-06	0.01566	Atp1a1, Atp2c1, Atp2a1, Atp1b1, Atp5e, Atp2a2, Atp5b, Atp12a, Txndc3, Tgfb1, Ak3, Aldoa, Atp5a1, Ldhd, Atp5o, Nme2, Atp5g3, Atp5h,
GO:0006944	cellular membrane fusion	0.00597 ( 20 of 3350 genes )	0.00200 ( 68 of 34011 annotated genes )	3.36e-06	0.01573	Opa1, Vps33b, Cav2, Snapin, 5730419I09Rik, Afg3l2, Vamp8, Nploc4, Uso1, Stx4a, Vti1a, Stx3, Mfn1, Rab8a, Coro1a, Gnai3, Stx5a, Bax, Cd9, Tm7sf4,
GO:0046632	alpha-beta T cell differe	0.00597 ( 20 of 3350 genes )	0.00200 ( 68 of 34011 annotated genes )	3.36e-06	0.01573	Satb1, Foxp3, Ap3b1, Rara, Itpkb, Bcl11b, Tgfbr2, Ccr7, Bcl2, Ikzf1, Lef1, Ncor1, Zbtb7b, Il4ra, Zap70, Nckap1l, Stat6, Itk, Il2rg, Tcf7,
GO:0035303	regulation of dephosphory	0.00806 ( 27 of 3350 genes )	0.00323 ( 110 of 34011 annotated genes )	3.543e-06	0.01658	Lrrc68, Tmem188, Lmtk3, Ppp6r3, Ppp6r2, Igbp1, Sfi1, Rbm26, Iqgap1, Fkbp1a, Zcchc9, Wnk1, Mphosph10, Ywhae, Ubn1, Rrp1b, Ppp1r12a, Prkcd, Cep192, Gba, Hsp90b1, Tgfb1, Ppp6r1, Dlg2, Nckap1l, Gpatch2, Sema4d,
GO:0032319	regulation of Rho GTPase	0.00627 ( 21 of 3350 genes )	0.00218 ( 74 of 34011 annotated genes )	3.637e-06	0.01702	Pip5k1a, Myo9b, Arhgap15, Gsk3b, Arhgap1, Arfgef1, Arhgap4, Epha5, Ccr7, Scrib, Ralbp1, Ccl11, Gmip, Rap1gds1, Ndel1, Bves, Pafah1b1, Nckap1l, Sema4d, Arhgef10l, Rictor,
GO:0006305	DNA alkylation	0.00418 ( 14 of 3350 genes )	0.00109 ( 37 of 34011 annotated genes )	3.722e-06	0.01742	Tdrd1, Mll5, Ctcf, Atf7ip, Gsk3b, Mta2, Ehmt1, Gnas, Mll1, Hells, Dnmt3a, Brca1, Dnmt3b, Dnmt1,
GO:0006306	DNA methylation	0.00418 ( 14 of 3350 genes )	0.00109 ( 37 of 34011 annotated genes )	3.722e-06	0.01742	Tdrd1, Mll5, Ctcf, Atf7ip, Gsk3b, Mta2, Ehmt1, Gnas, Mll1, Hells, Dnmt3a, Brca1, Dnmt3b, Dnmt1,
GO:0048002	antigen processing and pr	0.00418 ( 14 of 3350 genes )	0.00109 ( 37 of 34011 annotated genes )	3.722e-06	0.01742	H2-D1, Tapbp, H2-Q2, H2-gs10, B2m, Bat3, H2-K1, Tap1, H2-Q6, Calr, Ctse, H2-T23, H2-Q1, H2-Oa,
GO:0002263	cell activation involved	0.00925 ( 31 of 3350 genes )	0.00400 ( 136 of 34011 annotated genes )	3.75e-06	0.01755	Pi4k2a, Tlr2, Pram1, Foxp3, Rara, Rps6, Psen1, Lig4, Abr, Adora3, Ccr7, Ndfip1, Lef1, Lat, Lcp1, Lgals8, Tgfb1, Rab27a, Paxip1, Itgal, Clcf1, Hspd1, Il4ra, Lgals1, Pdpk1, Ptprc, Stat6, Trp53, Bcr, Rnf168, Cplx2,
GO:0002366	leukocyte activation invo	0.00925 ( 31 of 3350 genes )	0.00400 ( 136 of 34011 annotated genes )	3.75e-06	0.01755	Pi4k2a, Tlr2, Pram1, Foxp3, Rara, Rps6, Psen1, Lig4, Abr, Adora3, Ccr7, Ndfip1, Lef1, Lat, Lcp1, Lgals8, Tgfb1, Rab27a, Paxip1, Itgal, Clcf1, Hspd1, Il4ra, Lgals1, Pdpk1, Ptprc, Stat6, Trp53, Bcr, Rnf168, Cplx2,
GO:0006338	chromatin remodeling	0.00567 ( 19 of 3350 genes )	0.00185 ( 63 of 34011 annotated genes )	3.889e-06	0.0182	Ino80, Baz1b, Hjurp, Satb1, Top1, Rsf1, Nasp, Chd8, Hmg20b, Hdac4, Morf4l1, Arid1a, Mta2, Rere, Bptf, Hells, Smarcc2, Chd1, Rbbp7,
GO:0050821	protein stabilization	0.00567 ( 19 of 3350 genes )	0.00185 ( 63 of 34011 annotated genes )	3.889e-06	0.0182	Creb1, Stxbp1, Smad7, Calr, Hcfc1, Park7, Ube2b, Tbrg1, Tesc, Pten, Pex6, Apbb2, Bat3, Sox17, Hspd1, Flna, Dsg1a, Nckap1, Morc3,
GO:0051240	positive regulation of mu	0.02388 ( 80 of 3350 genes )	0.01479 ( 503 of 34011 annotated genes )	4.065e-06	0.01903	Stat5b, Hrh1, Zc3hav1, Rara, Atp2a1, Psen1, Dlg4, Adam17, Npy2r, Ccr7, Adora3, Ano6, Prkd2, Chd7, Hsf1, Ncs1, Gria1, Rgs14, Lrp6, Il12rb1, Celf1, Atp1a1, Nipbl, Alox5, Il17ra, Bcl2, Kiss1r, Fbn2, Pycard, Ikzf1, Arnt, Dlg1, Ifnar1, Rbpj, Itgb3, Ccl5, Il20rb, Tpm1, Tbk1, Tlr2, Irf3, Creb1, Foxp3, Fgfr2, Polr3a, Mtpn, Sod1, Arrb2, Pten, Tgfb1, Casp1, Cd3e, Il4ra, Polr3f, Bax, Notch1, Tm7sf4, Vegfa, …
GO:0032392	DNA geometric change	0.00328 ( 11 of 3350 genes )	0.00071 ( 24 of 34011 annotated genes )	4.541e-06	0.02126	Ino80, Ddx1, Chd8, Rad50, Ercc3, Ruvbl2, Wrn, Recql, Mcm6, Ascc3, Mcm4,
GO:0045732	positive regulation of pr	0.00627 ( 21 of 3350 genes )	0.00221 ( 75 of 34011 annotated genes )	4.599e-06	0.02153	Mylip, Trib2, Lpcat1, Stub1, Cblb, Smad7, Psen1, Trib1, Csnk1d, Gnb2l1, Ndfip1, Lrrk2, Pten, Taf1, Sox17, A930001N09Rik, Snx1, Trim30a, Apc, Nrd1, Psmd10,
GO:0006909	phagocytosis	0.00746 ( 25 of 3350 genes )	0.00291 ( 99 of 34011 annotated genes )	4.658e-06	0.0218	Tyro3, Csk, Coro1c, C3, Cd47, Rara, Calr, Elmo2, Abr, Ccr7, Gnb2l1, Cnn2, Pten, Lrp1, Tgfb1, Scarb1, Pecam1, Coro1a, Elmo1, Cdc42se1, Nckap1l, Abca7, Bcr, Vav1, Megf10,
GO:0006482	protein demethylation	0.00299 ( 10 of 3350 genes )	0.00059 ( 20 of 34011 annotated genes )	4.67e-06	0.02186	Kdm5c, Kdm1a, Kdm3a, Kdm4c, Phf8, Kdm5b, Kdm2a, Kdm5d, Ube2b, Jhdm1d,
GO:0008214	protein dealkylation	0.00299 ( 10 of 3350 genes )	0.00059 ( 20 of 34011 annotated genes )	4.67e-06	0.02186	Kdm5c, Kdm1a, Kdm3a, Kdm4c, Phf8, Kdm5b, Kdm2a, Kdm5d, Ube2b, Jhdm1d,
GO:0018022	peptidyl-lysine methylati	0.00299 ( 10 of 3350 genes )	0.00059 ( 20 of 34011 annotated genes )	4.67e-06	0.02186	Setd1a, Setd7, Setd2, Suv420h1, Ezh1, Setd8, Setd3, Ehmt1, Wbp7, Mll3,
GO:0006606	protein import into nucle	0.01164 ( 39 of 3350 genes )	0.00565 ( 192 of 34011 annotated genes )	4.747e-06	0.02222	Uaca, Snupn, Cfl1, Tlr2, Arntl, Gsk3b, Ogg1, Tnpo3, Spnb2, Cherp, Nup155, Hsp90aa1, Nop58, Tgfb1, Creb3, Med1, Flna, Hsp90ab1, Trp53, Kpna6, Psmd10, Pik3r1, Ppp3ca, Pde2a, Ep300, Pola2, Emd, Oprd1, l7Rn6, Smad4, Tmem173, Ubr5, Kpnb1, Rbm22, Ing1, Cep57, Phip, Mapk14, Cyld,
GO:0048729	tissue morphogenesis	0.02328 ( 78 of 3350 genes )	0.01438 ( 489 of 34011 annotated genes )	4.776e-06	0.02236	Cfl1, Frzb, Smad7, Psen1, Krt27, Aldh1a3, Rgma, Egln1, Tbx6, Setd2, Ttn, Lrp6, Ptk7, Pitx2, Nfatc3, Gna13, Hectd1, Prkar1a, Frs2, Tcf7l1, Tgfbr2, Bcl2, Smad4, Scrib, Dlg1, Runx1, Lama1, Rbpj, Trim28, Il10, Tcfap2c, Lif, Sema3a, Tpm1, Casp8, Vasp, Kat2a, Igf1r, Chuk, Tctn1, Pax7, Fgfr2, Macf1, Ilk, Stk4, Numb, Ccl11, Tnnc1, Tgfb1, Smad2, Sox17, Med12, Notch2, Notch1, Runx3, Med1, Vegfa, Deaf1, Ift…
GO:0010212	response to ionizing radi	0.00687 ( 23 of 3350 genes )	0.00256 ( 87 of 34011 annotated genes )	4.818e-06	0.02255	Rfwd3, Rad54l, Ino80, Chek2, Uimc1, Prkdc, Nipbl, Usp28, Gpx1, Brcc3, Lig4, Bcl2, Trp53bp2, Paxip1, Obfc2a, Bax, Ptprc, Trp53, Brca1, Mapk14, Rnf168, Eya3, Lrp2,
GO:0031058	positive regulation of hi	0.00388 ( 13 of 3350 genes )	0.00097 ( 33 of 34011 annotated genes )	4.89e-06	0.02289	Jarid2, Tgfb1, Paxip1, Ncor1, Foxp3, Nipbl, Brd7, Srebf1, Ogt, Trp53, Brca1, Dnmt3b, Dnmt1,
GO:0060429	epithelium development	0.02627 ( 88 of 3350 genes )	0.01679 ( 571 of 34011 annotated genes )	5.051e-06	0.02364	Stat5b, Cfl1, Lats1, Frzb, Psen1, Bcl11b, Aldh1a3, Id2, Rgma, Setd2, Prom1, Rock1, Stat6, Lrp6, Ptk7, Pitx2, Psap, Vezf1, Apc, Nfatc3, Wdr77, Gna13, Prkch, Pde2a, Gpx1, Hectd1, Frs2, Tgfbr2, Foxp2, Bcl2, Gpsm2, Ubn1, Smad4, Scrib, Dlg1, Lama1, Rbpj, Trim28, Agpat6, Il10, Tcfap2c, Lif, Agap2, Aimp2, Sema3a, Numa1, Casp8, Vasp, Kat2a, Igf1r, Itga4, Zeb1, Chuk, Foxp1, Tctn1, Stra6, Fgfr2, Ilk, Stk4,…
GO:0030155	regulation of cell adhesi	0.01403 ( 47 of 3350 genes )	0.00735 ( 250 of 34011 annotated genes )	5.079e-06	0.02377	Stat5b, Ldb1, Gsk3b, Abi3bp, Smad7, Fermt3, Myo10, Npy2r, Macf1, Ilk, Spn, Fam38a, Atp5b, Rasa1, Ppp1r12a, Tesc, Prkcd, Pten, Prkd2, Tgfb1, Lgals1, Dab1, Pde3b, Notch1, Vegfa, Vav1, Apc, S1pr1, Cyth1, Map2k5, Pik3r1, Cd47, Utrn, Ppp1cb, Bcl2, Lama1, Lef1, Rbpj, Itgal, Ccl5, Acer2, Itgb3, Ptprc, Itga6, Nckap1l, Cytip, Ret,
GO:0031667	response to nutrient leve	0.01224 ( 41 of 3350 genes )	0.00609 ( 207 of 34011 annotated genes )	5.304e-06	0.02483	Usf2, Hspa5, Prkaa1, Wrn, Rara, Ctsd, Psen1, Atg13, Npc1, Atg16l1, Sod1, Tesc, Mill2, Snw1, Tnrc6a, Suox, Mll5, Cd3e, Gdap2, Scamp3, Atg7, Trim24, Add1, Lrp6, Med1, Trp53, Ptk7, Supt5h, Sp100, Wac, Srebf1, Stat1, Aqp3, Mtap7, Runx1, Acer2, Acadm, Ogt, Larp1, Ncoa1, Ret,
GO:0006984	ER-nucleus signaling path	0.00448 ( 15 of 3350 genes )	0.00126 ( 43 of 34011 annotated genes )	5.476e-06	0.02563	Ppp1r15a, Amfr, Hspa5, Vapb, Ddit3, Gsk3b, Srebf1, Creb3, Ero1l, Trp53, Ccdc47, Derl2, Arhgef10l, Atp2a2, Dnajc3,
GO:2000147	positive regulation of ce	0.01313 ( 44 of 3350 genes )	0.00673 ( 229 of 34011 annotated genes )	5.606e-06	0.02624	Tlr2, Phpt1, Igf1r, Ets1, Adam17, Map2k2, Ccr7, Adora3, Gnb2l1, Ilk, Ccl11, Prkd2, Tgfb1, Rapgef4, Pecam1, Spag9, Plcg1, Creb3, Notch1, Amotl1, Ptp4a1, Trp53, Il6st, Vegfa, Sema4d, Apc, Sell, S1pr1, Akt2, Pik3r1, Tgfbr2, Bcl2, Mif, Diap1, Ddr2, Lef1, 1810046J19Rik, Ccl5, Itgb3, Coro1a, Ptprc, Nckap1l, Hbegf, Ret,
GO:0044057	regulation of system proc	0.02239 ( 75 of 3350 genes )	0.01373 ( 467 of 34011 annotated genes )	5.616e-06	0.02629	Hrh1, Rims4, Gabbr1, Rara, Atp2a1, Smad7, Psen1, Dlg4, Pfn2, Anapc2, Npy2r, Atp2a2, Rapgef4, Atad1, Adrbk1, Cacna2d2, Sipa1l1, Ncs1, Gria1, Rgs14, Cplx2, Atp1a1, Ppp3ca, Pik3r1, Stxbp1, Calcrl, Alox5, Hmgcr, Rtn4, Prol1, Oprd1, Kiss1r, Npy5r, Rab8a, Il10, Lif, Grid2ip, Neurod1, Cyba, Gnai2, Sema3a, Mgea5, Dbi, Hbegf, Tpm1, Gsk3b, Anxa6, Rab8b, Gja5, Mtpn, Sod1, Slc30a1, Tshz3, Arrb2, Hdac4, Pten,…
GO:0051704	multi-organism process	0.03134 ( 105 of 3350 genes )	0.02099 ( 714 of 34011 annotated genes )	5.651e-06	0.02645	Stat5b, Zc3hav1, Otud5, Il25, Wasl, Sp3, Rara, Mapkapk2, Dlg4, Adam17, Ubr3, Ddx60, Ccr7, Spn, Adh5, Apobec3, Mmp7, Vapb, Hsf1, Oas1b, Phf21a, Il12rb1, Thoc1, Ddx21, Cd47, H2-K1, Tap1, Gpx1, Stat1, Crebzf, Bcl2, Bst2, Tmem173, Hdac1, H2-Q1, Pycard, Ifnar1, Ncf2, Rbpj, Il10, Ccl5, Lif, Ptprc, Pde4b, Paf1, Ifnb1, Reck, Tbk1, Tlr2, Rela, Irf3, Chuk, Irak2, Cdc73, Pcbp2, Prdx3, Abr, Thoc5, Etf1, Sod1…
GO:0030307	positive regulation of ce	0.00746 ( 25 of 3350 genes )	0.00294 ( 100 of 34011 annotated genes )	5.651e-06	0.02645	Ino80, Map2k5, Ep300, Adam17, Anapc2, Bcl2, Ilk, 2400003C14Rik, Usp47, Mtpn, Lef1, Trpv2, Ndel1, Islr2, Pafah1b1, Ntrk3, Fxn, Nol8, Cyba, Ncoa3, Cdh4, Hbegf, Derl2, Sema4d, Psmd10,
GO:0019827	stem cell maintenance	0.00716 ( 24 of 3350 genes )	0.00276 ( 94 of 34011 annotated genes )	5.837e-06	0.02732	Med15, Med14, Ldb1, Zhx2, Zcchc11, Nipbl, Smc3, Cdc73, Smc1a, Tcf7l1, Crebbp, Lig4, Leo1, Stag2, Med28, Dicer1, Rbpj, Med12, Tcfap2c, Lif, Paf1, Myst3, Sall4, Apc,
GO:0045787	positive regulation of ce	0.00806 ( 27 of 3350 genes )	0.00332 ( 113 of 34011 annotated genes )	6.102e-06	0.02856	Stat5b, Terf1, Smc5, Usp22, Srpk2, Rara, Mta3, Pim1, Adam17, Calr, Ccnd2, Fgfr2, BC004004, Brd4, Id2, Pkn2, Pten, Pafah1b1, Trim21, Fnta, Eif4ebp1, Nsmce2, Pggt1b, Lrp6, Med1, Trp53, Psmd10,
GO:0009896	positive regulation of ca	0.00866 ( 29 of 3350 genes )	0.00370 ( 126 of 34011 annotated genes )	6.21e-06	0.02907	Mylip, Wac, Trib2, Lpcat1, Prkaa1, Akt2, Stub1, Cblb, Smad7, Psen1, Trib1, Ndfip1, Acsl5, Csnk1d, Gnb2l1, Mif, Lrrk2, Pten, Taf1, Sox17, A930001N09Rik, Atg7, Snx1, Trim30a, Larp1, Supt5h, Psmd10, Apc, Nrd1,
GO:0045582	positive regulation of T	0.00507 ( 17 of 3350 genes )	0.00159 ( 54 of 34011 annotated genes )	6.526e-06	0.03055	Stat5b, Foxp3, Ap3b1, Rara, Itpkb, Tgfbr2, Ccr7, Hsp90aa1, Ikzf1, Cd27, Il4ra, Lck, Zap70, Ptprc, Nckap1l, Il7r, Il2rg,
GO:0031061	negative regulation of hi	0.00209 ( 7 of 3350 genes )	0.00029 ( 10 of 34011 annotated genes )	6.658e-06	0.03116	Kdm1a, Kdm3a, Jarid2, Dnmt3b, Brca1, Bcor, Dnmt1,
GO:0006732	coenzyme metabolic proces	0.01134 ( 38 of 3350 genes )	0.00553 ( 188 of 34011 annotated genes )	7.039e-06	0.03295	Mat2b, Suclg1, Pcbd2, Mat2a, Taldo1, Atic, Hsd11b1, Ldha, Acaa2, Acadsb, Dlst, Aco1, Mocos, Sdhc, Pdha2, Fdx1, Sdha, Mthfd1l, Mdh2, Gart, Aco2, Hmgcr, Idh2, Idh3g, Dld, Dnmt1, Ogdh, Pdha1, Ncf2, Txnrd1, Agpat6, Pank3, Pgam1, Glyr1, Dgat1, Ces1d, Cs, Idh3b,
GO:0032886	regulation of microtubule	0.00716 ( 24 of 3350 genes )	0.00279 ( 95 of 34011 annotated genes )	7.108e-06	0.03327	Terf1, Cdkn1b, Cep250, Igbp1, Gsk3b, Mapre1, Macf1, Tbcd, Lrrc50, Hsph1, Xpo1, Sbds, Clip1, Cep192, Diap1, Fkbp4, Senp6, 6720463M24Rik, Npm1, Rnf4, Cyld, Racgap1, Apc, Rock2,
GO:0051054	positive regulation of DN	0.00716 ( 24 of 3350 genes )	0.00279 ( 95 of 34011 annotated genes )	7.108e-06	0.03327	Parg, Ino80, Uimc1, Pfn1, Igf1r, Brcc3, Calr, Cst3, Ube2b, Kctd13, Tinf2, Tgfb1, Bmp5, Paxip1, Trim28, Clcf1, Npm1, Csf2, Ptprc, Mgea5, Stat6, Brca1, Rnf168, Eya3,
GO:0002562	somatic diversification o	0.00478 ( 16 of 3350 genes )	0.00144 ( 49 of 34011 annotated genes )	7.156e-06	0.0335	Foxp3, Prkdc, Foxp1, Bcl11b, Lig4, Ndfip1, Lef1, Paxip1, Tgfb1, Clcf1, Hspd1, Rag1, Ptprc, Stat6, Rnf168, Tcf7,
GO:0016444	somatic cell DNA recombin	0.00478 ( 16 of 3350 genes )	0.00144 ( 49 of 34011 annotated genes )	7.156e-06	0.0335	Foxp3, Prkdc, Foxp1, Bcl11b, Lig4, Ndfip1, Lef1, Paxip1, Tgfb1, Clcf1, Hspd1, Rag1, Ptprc, Stat6, Rnf168, Tcf7,
GO:0006405	RNA export from nucleus	0.00388 ( 13 of 3350 genes )	0.00100 ( 34 of 34011 annotated genes )	7.225e-06	0.03382	Nup160, Bat1a, Srsf10, Npm1, Rps28, Nxf1, Thoc5, Nup155, Rpsa, Thoc1, Eif5a, Pabpn1, Ddx39,
GO:0022900	electron transport chain	0.00806 ( 27 of 3350 genes )	0.00335 ( 114 of 34011 annotated genes )	7.274e-06	0.03405	Sdha, Ndufs1, Ndufc2, Cmah, Fads2, Uqcrc1, Ndufs2, Ndufa9, Cyb5b, Etfa, Ndufa2, Ndufa13, Cyc1, Dld, Enox2, Txnl1, Txnrd3, Etfb, Ndufa10, Uqcr11, Uqcr10, Cyba, Cr1l, Uqcrc2, Ero1l, Sdhc, Fdx1,
GO:0030851	granulocyte differentiati	0.00328 ( 11 of 3350 genes )	0.00074 ( 25 of 34011 annotated genes )	7.408e-06	0.03468	Kdm1a, Inpp5d, Tesc, Runx1, Lef1, Mll5, Il25, Sp3, Rara, Ogt, Ikzf1,
GO:0018210	peptidyl-threonine modifi	0.00537 ( 18 of 3350 genes )	0.00176 ( 60 of 34011 annotated genes )	7.541e-06	0.0353	Prkcb, Pkn1, Gsk3b, Clk1, Smad7, Tgfbr2, Bcl2, Hk1, Lrrk2, Prkcd, Tgfb1, Taf1, Galnt1, Pdpk1, Phip, Adrbk1, Nlk, Galnt3,
GO:0061136	regulation of proteasomal	0.00537 ( 18 of 3350 genes )	0.00176 ( 60 of 34011 annotated genes )	7.541e-06	0.0353	Wac, Trib2, Ubxn1, Stub1, Smad7, Psen1, Gpx1, Trib1, Csnk1d, Gnb2l1, Lrrk2, Pten, Bat3, Taf1, Psme3, Mad2l1, Psmd10, Rad23b,
GO:0031346	positive regulation of ce	0.00985 ( 33 of 3350 genes )	0.00453 ( 154 of 34011 annotated genes )	7.647e-06	0.0358	Wasl, Rab8b, Anapc2, Ccr7, Ilk, Hsp90aa1, 2400003C14Rik, Cntn1, Numb, Trpv2, Ndel1, Pafah1b1, Actr3, Ppp2r5d, Gpm6a, Cdh4, Ptk7, Sema4d, Apc, Caprin1, Fyn, Ep300, Mark2, Mif, 1810046J19Rik, Islr2, Fxn, Lif, Nme2, Ntrk3, Stk24, Fig4, Ret,
GO:0030521	androgen receptor signali	0.00418 ( 14 of 3350 genes )	0.00115 ( 39 of 34011 annotated genes )	7.65e-06	0.03581	Ube3a, Ddx5, Kdm3a, Arrb2, Med14, Fkbp4, Med12, Ep300, Arid1a, Med13, Med1, Park7, Hdac1, Phb,
GO:0002820	negative regulation of ad	0.00269 ( 9 of 3350 genes )	0.00050 ( 17 of 34011 annotated genes )	7.781e-06	0.03642	Ptpn6, Ptprc, Il20rb, Ppp3cb, Il7r, Foxp3, Spn, Trim27, Samsn1,
GO:0051569	regulation of histone H3-	0.00269 ( 9 of 3350 genes )	0.00050 ( 17 of 34011 annotated genes )	7.781e-06	0.03642	Kdm1a, Ogt, Mll1, Wbp7, Paxip1, Dnmt3b, Brca1, Bcor, Dnmt1,
GO:0006469	negative regulation of pr	0.00896 ( 30 of 3350 genes )	0.00394 ( 134 of 34011 annotated genes )	7.819e-06	0.0366	Lax1, Cdkn1b, Igf1r, Gsk3b, Lats1, Psen1, Hmgcr, Trib1, Wnk1, Gnb2l1, Rgs2, Ilk, Dusp10, Dusp7, Ptpn6, Dbndd2, Prkcd, Pten, Dusp19, Gba, Trim27, Stk38, Pdpk1, Ptprc, Kat2b, Rgs14, Lrp6, Dusp1, Dnajc3, Apc,
GO:0030100	regulation of endocytosis	0.00896 ( 30 of 3350 genes )	0.00394 ( 134 of 34011 annotated genes )	7.819e-06	0.0366	Csk, C3, Syne1, Cd47, Wasl, Hnrnpk, Dlg4, Calr, Ccr7, Abr, Vamp8, Gnb2l1, Scyl2, Cnn2, Picalm, Arrb2, Pten, Bin1, Tgfb1, Scarb1, Tnk2, Atad1, Ppt1, Cd2ap, Add1, Nckap1l, Actn4, Bcr, Vegfa, Sgip1,
GO:0002568	somatic diversification o	0.00149 ( 5 of 3350 genes )	0.00015 ( 5 of 34011 annotated genes )	7.921e-06	0.03708	Bcl11b, Lig4, Lef1, Tcf7, Prkdc,
GO:0002681	somatic recombination of	0.00149 ( 5 of 3350 genes )	0.00015 ( 5 of 34011 annotated genes )	7.921e-06	0.03708	Bcl11b, Lig4, Lef1, Tcf7, Prkdc,
GO:0033153	T cell receptor V(D)J rec	0.00149 ( 5 of 3350 genes )	0.00015 ( 5 of 34011 annotated genes )	7.921e-06	0.03708	Bcl11b, Lig4, Lef1, Tcf7, Prkdc,
GO:0044271	cellular nitrogen compoun	0.02328 ( 78 of 3350 genes )	0.01458 ( 496 of 34011 annotated genes )	8.111e-06	0.03797	Hrh1, Gabbr1, Pcbd2, Mat2a, Ak1, Atp2a1, Gars, Atic, Npy2r, Hsp90aa1, Umps, Atp2a2, Asl, Atp5b, Apip, Ak2, Atp12a, Gba, Ldhd, Gnai3, Flna, Ass1, Tspo, Atp5h, Mthfd1l, Gart, Akt2, Atp1a1, Gna13, Pde2a, Calcrl, Atp5e, Oprd1, Txndc3, Ddah1, Il10, Fxn, Ddc, Oas2, Gnai2, Mat2b, Itgb2, Tlr2, S1pr4, Gnas, Tk2, Etnk1, Ireb2, Ctps2, Mocos, Tgfb1, Aldoa, Atp5a1, Adcy6, Atp5o, Atp5g3, Chdh, Adcyap1r1, Sptlc…
GO:0000245	spliceosome assembly	0.00299 ( 10 of 3350 genes )	0.00062 ( 21 of 34011 annotated genes )	8.15e-06	0.03815	Bat1a, Ptbp2, Srsf10, Srpk2, Mbnl1, Rbm5, Celf2, Zrsr2, Srsf2ip, Celf1,
GO:0002704	negative regulation of le	0.00299 ( 10 of 3350 genes )	0.00062 ( 21 of 34011 annotated genes )	8.15e-06	0.03815	Ptpn6, Arrb2, Foxp3, Tap1, Clec2d, Il20rb, Ptprc, Ppp3cb, Il7r, Spn,
GO:0002707	negative regulation of ly	0.00299 ( 10 of 3350 genes )	0.00062 ( 21 of 34011 annotated genes )	8.15e-06	0.03815	Ptpn6, Arrb2, Foxp3, Tap1, Clec2d, Il20rb, Ptprc, Ppp3cb, Il7r, Spn,
GO:0050856	regulation of T cell rece	0.00299 ( 10 of 3350 genes )	0.00062 ( 21 of 34011 annotated genes )	8.15e-06	0.03815	Ptpn6, Phpt1, Prkd2, Lck, Cblb, Ubash3a, Malt1, Ccr7, Ptpn22, Kcnn4,
GO:0072522	purine-containing compoun	0.01343 ( 45 of 3350 genes )	0.00706 ( 240 of 34011 annotated genes )	8.561e-06	0.04007	Mat2b, Gabbr1, S1pr4, Mat2a, Ak1, Atp2a1, Gars, Atic, Gnas, Npy2r, Atp2a2, Atp5b, Ak2, Atp12a, Tgfb1, Ldhd, Aldoa, Atp5a1, Adcy6, Gnai3, Atp5o, Atp5g3, Adcyap1r1, Flna, Atp5h, Paics, S1pr1, Atp1a1, Gart, Gna13, Pde2a, Atp2c1, Calcrl, Atp1b1, Atp5e, Slc9a3r1, Oprd1, Npr2, Mc2r, Adss, Txndc3, Ak3, Nme2, Oas2, Gnai2,
GO:0061025	membrane fusion	0.00597 ( 20 of 3350 genes )	0.00212 ( 72 of 34011 annotated genes )	8.783e-06	0.04112	Opa1, Vps33b, Cav2, Snapin, 5730419I09Rik, Afg3l2, Vamp8, Nploc4, Uso1, Stx4a, Vti1a, Stx3, Mfn1, Rab8a, Coro1a, Gnai3, Stx5a, Bax, Cd9, Tm7sf4,
GO:0043281	regulation of caspase act	0.01015 ( 34 of 3350 genes )	0.00476 ( 162 of 34011 annotated genes )	9.018e-06	0.04221	Uaca, Terf1, Hspa5, Igbp1, Prdx3, Cflar, Nr4a1, Usp47, Map3k5, Fis1, Gpi1, Casp9, Ptma, Bax, Hbxip, Vegfa, Rps3, Cdkn1b, Akt2, Map2k5, Bcap31, Gpx1, Pycard, Cd27, Lef1, Hspd1, Csnk2a1, Acer2, Lck, Rag1, Rps6ka1, Ifnb1, Por, Ints1,
GO:0055074	calcium ion homeostasis	0.01433 ( 48 of 3350 genes )	0.00773 ( 263 of 34011 annotated genes )	9.329e-06	0.04367	Immt, Cul5, Cd52, Prkcb, Plcd1, Atp2a1, Psen1, Gnas, Cherp, Npy2r, Ryr3, Atp2a2, Slc30a1, Fis1, Vapb, Tgfb1, Cacna1c, Trim24, Bax, Adcyap1r1, Lrp6, Il6st, Ccdc47, Trpc2, S1pr1, Bcap31, Gna13, Cacna1a, Atp2c1, Fkbp1a, Kcnk3, Gnb1, P2rx4, Cxcl3, Bcl2, Dhrs7c, Itpr1, Diap1, Ccl5, Itgb3, Lck, Ptprc, Cacna1g, Mgea5, Dbi, Slc37a4, Gtf2i, Sypl2,
GO:0032434	regulation of proteasomal	0.00478 ( 16 of 3350 genes )	0.00147 ( 50 of 34011 annotated genes )	9.594e-06	0.04491	Wac, Trib2, Ubxn1, Stub1, Smad7, Psen1, Trib1, Csnk1d, Gnb2l1, Lrrk2, Pten, Bat3, Taf1, Mad2l1, Rad23b, Psmd10,
GO:0009725	response to hormone stimu	0.02000 ( 67 of 3350 genes )	0.01205 ( 410 of 34011 annotated genes )	9.679e-06	0.04531	Stat5b, Kdm3a, Prkcb, Plcd1, Mat2a, Rara, Lats1, Atp2a1, Sva, Ccr7, Atp2a2, Hcls1, Nr2c1, Eif4ebp1, Kat2b, Ass1, Nr2c2, Csk, Akt2, Pik3r1, Lox, Prkdc, Stat1, Bcl2, Tbl1x, Strn3, Ncf2, Il10, Lancl2, Adipor2, Stxbp3a, Egr2, Prdm2, Rela, Esrrg, Ogg1, Ash2l, Foxo1, Nr4a1, Ptpra, Npc1, Prkcd, Ybx1, Casp9, Sh2b2, Tgfb1, Adcy6, Pdpk1, Trim24, Med1, Brca1, Foxo4, Ep300, Eif2b2, Ghr, Ptprv, Srebf1, Rbbp5,…
GO:0050670	regulation of lymphocyte	0.00955 ( 32 of 3350 genes )	0.00438 ( 149 of 34011 annotated genes )	9.931e-06	0.04649	Stat5b, Inpp5d, Foxp3, Ccr7, Ndfip1, Ptpn22, Spn, Ptpn6, Cd86, Tgfb1, Cd3e, Clcf1, Clec2i, Il12rb1, Il6st, Tnfrsf14, Card11, Nfatc2, Cblb, Ctla4, Bcl2, Mif, Dlg1, Ikzf3, Itgal, Il10, Ccl5, Coro1a, Zap70, Il20rb, Ptprc, Nckap1l,
GO:0019953	sexual reproduction	0.02239 ( 75 of 3350 genes )	0.01400 ( 476 of 34011 annotated genes )	1.118e-05	0.05234	Tyro3, Kdm3a, Prm2, Rara, Wee2, Wbp7, Oas1d, Dnmt3a, Ube2b, Ube3a, Msh5, Sbf1, Hsf1, Rnf17, Ubr2, Celf1, Bik, Herc4, Nr2c2, Gpx4, Aff4, Prkdc, Rps6, Bcl2, Krt9, Park7, Dld, Mtap7, Txndc3, Sepp1, Ggnbp2, Mcm9, Rad23b, Ubap2l, Pvrl3, Theg, Pgm3, Clgn, Gsr, Txnrd3, 4932438A13Rik, Sod1, Apob, Bat3, Sox17, Tgfb1, Pafah1b1, Ggn, Bax, Adcyap1r1, Prm3, Notch1, Herc2, Trpc2, Tdrd1, Hexa, Plekha1, B4galnt1…
GO:0051494	negative regulation of cy	0.00627 ( 21 of 3350 genes )	0.00232 ( 79 of 34011 annotated genes )	1.12e-05	0.05241	Tmsb10, S1pr1, Pfn1, Spnb2, Capza1, Pfn2, Mapre1, Arfgef1, Tbcd, Sbds, Evl, Prkcd, Rdx, Capzb, Fkbp4, Coro1a, Add1, Tmod3, Tpm1, Spna2, Apc,
GO:0072507	divalent inorganic cation	0.01493 ( 50 of 3350 genes )	0.00823 ( 280 of 34011 annotated genes )	1.145e-05	0.05358	Immt, Cul5, Cd52, Prkcb, Plcd1, Atp2a1, Psen1, Gnas, Cherp, Npy2r, Slc30a2, Ryr3, Atp2a2, Slc30a1, Fis1, Vapb, Tgfb1, Cacna1c, Trim24, Bax, Adcyap1r1, Lrp6, Il6st, Ccdc47, Trpc2, S1pr1, Bcap31, Gna13, Cacna1a, Atp2c1, Fkbp1a, Kcnk3, Gnb1, P2rx4, Cxcl3, Bcl2, Trpm7, Dhrs7c, Itpr1, Diap1, Ccl5, Itgb3, Lck, Ptprc, Cacna1g, Mgea5, Dbi, Slc37a4, Gtf2i, Sypl2,
GO:0032944	regulation of mononuclear	0.00955 ( 32 of 3350 genes )	0.00441 ( 150 of 34011 annotated genes )	1.148e-05	0.05374	Stat5b, Inpp5d, Foxp3, Ccr7, Ndfip1, Ptpn22, Spn, Ptpn6, Cd86, Tgfb1, Cd3e, Clcf1, Clec2i, Il12rb1, Il6st, Tnfrsf14, Card11, Nfatc2, Cblb, Ctla4, Bcl2, Mif, Dlg1, Ikzf3, Itgal, Il10, Ccl5, Coro1a, Zap70, Il20rb, Ptprc, Nckap1l,
GO:0009719	response to endogenous st	0.02627 ( 88 of 3350 genes )	0.01714 ( 583 of 34011 annotated genes )	1.151e-05	0.05388	Stat5b, Mylip, Hrh1, Cfl1, Kdm3a, Prkcb, Plcd1, Mat2a, Rara, Lats1, Atp2a1, Adam17, Sva, Ccr7, Dnmt3a, Atp2a2, Hcls1, Nr2c1, Eif4ebp1, Plcg1, Ubr2, Kat2b, Ass1, Pde1b, Nr2c2, Csk, Akt2, Pik3r1, Lox, Prkdc, Stat1, Bcl2, Ubr1, Smad4, Tbl1x, Strn3, Col16a1, Robld3, Ncf2, Diap1, Lancl2, Il10, Adipor2, Stxbp3a, Dnmt3b, Egr2, Prdm2, Rela, Zeb1, Esrrg, Ogg1, Ash2l, Foxo1, Nr4a1, Ptpra, Npc1, Prkcd, Ybx1…
GO:0009887	organ morphogenesis	0.03254 ( 109 of 3350 genes )	0.02235 ( 760 of 34011 annotated genes )	1.168e-05	0.05468	Col4a3bp, Sp3, Rara, Pnpla6, Frzb, Upf2, Smad7, Psen1, Phlda2, Bcl11b, Npy2r, Krt27, Aldh1a3, Id2, Egln1, Setd2, Ttn, Chd7, Prom1, Lrp6, Ptk7, Pitx2, Tcf7, Apc, Nipbl, Prkar1a, Frs2, Tgfbr2, Rtn4, Foxp2, Bcl2, Smad4, Hdac1, Fbn2, Dlg1, Lrrk2, Runx1, Lama1, Agtpbp1, Rbpj, Npy5r, Wdr19, Bcor, Lif, Neurod1, Itga6, Hcn1, Tpm1, Baz1b, Rela, Pvrl3, Ncor2, Igf1r, Zeb1, Gsk3b, Nab1, Chuk, Foxp1, Stra6, P…
GO:0043523	regulation of neuron apop	0.00985 ( 33 of 3350 genes )	0.00462 ( 157 of 34011 annotated genes )	1.173e-05	0.05491	Tyro3, Psen1, Prdx3, Cdc34, Ilk, Hsph1, Sod1, Rasa1, Gpi1, Casp9, Clcf1, Ppt1, Bax, Rock1, Alkbh1, Hsp90ab1, Trp53, Itsn1, Cacna1a, Srpk2, Dnajc5, Stxbp1, Gpx1, Lig4, Bcl2, Hdac1, Park7, Ncf2, Braf, Casp2, Agap2, Set, Map2k7,
GO:0051235	maintenance of location	0.01045 ( 35 of 3350 genes )	0.00503 ( 171 of 34011 annotated genes )	1.195e-05	0.05594	Tmsb10, Nuf2, Lats1, Atp2a1, Cherp, Slc30a2, Bub3, Slc17a7, Tnrc6a, Tgfb1, Cer1, Bax, Creb3, Os9, Flna, Sgol1, Psmd10, Morc3, Apc, Pfn1, Syne1, Tln1, Nin, Fkbp1a, Fbn2, Dhrs7c, Itpr1, Diap1, Fth1, Cep57, Cd4, Lck, Ptprc, Dbi, Racgap1,
GO:0009100	glycoprotein metabolic pr	0.01194 ( 40 of 3350 genes )	0.00609 ( 207 of 34011 annotated genes )	1.268e-05	0.05934	B3galnt2, Edem3, Man1a2, Stt3b, Psen1, Entpd5, Arfgef1, B3gnt2, St6gal2, Npc1, Soat1, Poglut1, Alg12, Galnt1, St8sia1, Itm2b, Rpn2, Man2a1, Csgalnact2, Aatf, Ep300, B4galt1, Fkbp1a, Prss34, Uggt1, St8sia6, Bcl2, Cst3, Dlg1, Tmed10, St3gal1, Stt3a, Acer2, St6gal1, Oas2, Ogt, Mgea5, Ngly1, Hbegf, Galnt3,
GO:0045926	negative regulation of gr	0.01104 ( 37 of 3350 genes )	0.00547 ( 186 of 34011 annotated genes )	1.345e-05	0.06295	Tlr2, Tspyl2, Frzb, Arhgap4, Spg20, Ndufa13, Gnb2l1, Eno1, Stk4, Ing4, Pten, Tgfb1, Sox17, Foxk1, Scd1, Ppt1, Ei24, Trp53, Tm7sf4, Rbbp7, Cdkn1b, Crlf3, Rtn4, Bcl2, Gng4, Idh3g, Smad4, Gas1, Ppp1r9b, Apbb2, Il10, Fxn, Adipor2, Sema3a, Cda, Ptch1, Phb,
GO:0043631	RNA polyadenylation	0.00299 ( 10 of 3350 genes )	0.00065 ( 22 of 34011 annotated genes )	1.366e-05	0.06394	Paf1, Papolg, Nudt21, Leo1, Fip1l1, Cpsf3, Cpsf6, Pabpn1, Cdc73, Ahcyl1,
GO:0045577	regulation of B cell diff	0.00299 ( 10 of 3350 genes )	0.00065 ( 22 of 34011 annotated genes )	1.366e-05	0.06394	Stat5b, Ptpn6, Pcid2, Inpp5d, Ikzf3, Ptprc, Nckap1l, Id2, Il2rg, Card11,
GO:0045773	positive regulation of ax	0.00299 ( 10 of 3350 genes )	0.00065 ( 22 of 34011 annotated genes )	1.366e-05	0.06394	Trpv2, Ndel1, Islr2, Pafah1b1, Ep300, Ntrk3, Fxn, Anapc2, Cdh4, Ilk,
GO:0034101	erythrocyte homeostasis	0.00746 ( 25 of 3350 genes )	0.00309 ( 105 of 34011 annotated genes )	1.417e-05	0.06632	Stat5b, Inpp5d, Rps24, Ldb1, Sp3, Ets1, Rps6, Exoc6, Id2, Kdm1a, Ireb2, Rcor1, Hcls1, Mll5, Ncor1, Pknox1, Maea, Add1, Nckap1l, Rps14, Med1, Mapk14, Vegfa, Rps17, Rps19,
GO:0043524	negative regulation of ne	0.00746 ( 25 of 3350 genes )	0.00309 ( 105 of 34011 annotated genes )	1.417e-05	0.06632	Tyro3, Itsn1, Cacna1a, Stxbp1, Dnajc5, Psen1, Prdx3, Lig4, Bcl2, Ilk, Park7, Hsph1, Hdac1, Sod1, Rasa1, Gpi1, Braf, Clcf1, Set, Agap2, Ppt1, Bax, Rock1, Alkbh1, Hsp90ab1,
GO:0006378	mRNA polyadenylation	0.00269 ( 9 of 3350 genes )	0.00053 ( 18 of 34011 annotated genes )	1.424e-05	0.06665	Paf1, Nudt21, Leo1, Fip1l1, Cpsf3, Cpsf6, Pabpn1, Cdc73, Ahcyl1,
GO:0010390	histone monoubiquitinatio	0.00269 ( 9 of 3350 genes )	0.00053 ( 18 of 34011 annotated genes )	1.424e-05	0.06665	Wac, Bcor, Rag1, Rnf20, Pcgf1, Cdc73, Paf1, Leo1, Dtx3l,
GO:0042787	protein ubiquitination in	0.00507 ( 17 of 3350 genes )	0.00168 ( 57 of 34011 annotated genes )	1.463e-05	0.06848	Mylip, Herc4, Trip12, Lnx1, Nedd4l, Psen1, Hectd1, Herc3, Huwe1, Ubr5, Fbxo45, Ube3a, Pten, Os9, 1110018G07Rik, Rbbp6, Herc2,
GO:0050678	regulation of epithelial	0.01164 ( 39 of 3350 genes )	0.00591 ( 201 of 34011 annotated genes )	1.465e-05	0.06855	Foxp1, Cdc73, Cav2, Fgfr2, Ccnd2, Krit1, Nr4a1, Pten, Ccl11, Prkd2, Tgfb1, Bmp5, Atp5a1, Bax, Runx3, Notch1, Med1, Lrp6, Vegfa, Rictor, Apc, Deaf1, Cdkn1b, Wdr77, Map2k5, B4galt1, Gpx1, Frs2, Stat1, Foxp2, Dlg1, Gas1, Tinf2, Itgb3, Agap2, Nme2, Cyba, Aimp1, Ptch1,
GO:0030516	regulation of axon extens	0.00418 ( 14 of 3350 genes )	0.00121 ( 41 of 34011 annotated genes )	1.487e-05	0.06962	Trpv2, Ndel1, Islr2, Pafah1b1, Ep300, Ntrk3, Fxn, Anapc2, Arhgap4, Sema3a, Rtn4, Barhl2, Cdh4, Ilk,
GO:0006354	transcription elongation,	0.00388 ( 13 of 3350 genes )	0.00106 ( 36 of 34011 annotated genes )	1.499e-05	0.07015	Whsc2, Rdbp, Ezh2, Ldb1, Supt4h1, Cdc73, Tcea2, Paf1, Brd4, Leo1, Thoc1, Supt5h, Supt6h,
GO:0051187	cofactor catabolic proces	0.00388 ( 13 of 3350 genes )	0.00106 ( 36 of 34011 annotated genes )	1.499e-05	0.07015	Sdha, Suclg1, Mdh2, Dlst, Ncf2, Aco1, Aco2, Sdhc, Idh2, Idh3g, Ogdh, Cs, Idh3b,
GO:0051225	spindle assembly	0.00388 ( 13 of 3350 genes )	0.00106 ( 36 of 34011 annotated genes )	1.499e-05	0.07015	Ino80, Chek2, Rcc1, Haus4, Cep192, Dicer1, Ncor1, Senp6, Cltc, Csnk1d, Rnf4, Flna, Racgap1,
GO:0032101	regulation of response to	0.01701 ( 57 of 3350 genes )	0.00991 ( 337 of 34011 annotated genes )	1.563e-05	0.07317	Uaca, Tyro3, Stat5b, Rela, Foxp3, Adam17, Ccl21a, Ccr7, Abr, Adora3, Ndfip1, Spn, Npc1, Prkcd, Pten, Ano6, Tgfb1, Ndel1, Atg7, Clcf1, Il16, Stk39, Trim24, Cr1l, Creb3, Med1, Bcr, Vegfa, Supt5h, Sell, Wac, S1pr1, Akt2, Gpx4, C3, Cd47, Psma1, Pde2a, Calcrl, Gpx1, Hmgcr, Rtn4, Park7, Dusp10, Mif, Npy5r, Hspd1, Psmb4, Ccl5, Il10, Ntrk3, Ctla2a, Il20rb, Sema3a, Nckap1l, Larp1, Stk24,
GO:0002285	lymphocyte activation inv	0.00657 ( 22 of 3350 genes )	0.00256 ( 87 of 34011 annotated genes )	1.659e-05	0.07764	Foxp3, Rara, Rps6, Psen1, Lig4, Ccr7, Ndfip1, Lef1, Lcp1, Lgals8, Tgfb1, Itgal, Paxip1, Rab27a, Clcf1, Hspd1, Il4ra, Lgals1, Ptprc, Stat6, Trp53, Rnf168,
GO:0030335	positive regulation of ce	0.01254 ( 42 of 3350 genes )	0.00659 ( 224 of 34011 annotated genes )	1.677e-05	0.07851	Tlr2, Igf1r, Ets1, Adam17, Ccr7, Adora3, Gnb2l1, Ilk, Ccl11, Prkd2, Tgfb1, Rapgef4, Pecam1, Spag9, Plcg1, Creb3, Notch1, Amotl1, Ptp4a1, Trp53, Il6st, Vegfa, Sema4d, Apc, Sell, S1pr1, Akt2, Pik3r1, Tgfbr2, Bcl2, Mif, Diap1, Ddr2, Lef1, 1810046J19Rik, Ccl5, Itgb3, Coro1a, Ptprc, Nckap1l, Hbegf, Ret,
GO:0002200	somatic diversification o	0.00478 ( 16 of 3350 genes )	0.00153 ( 52 of 34011 annotated genes )	1.678e-05	0.07856	Foxp3, Prkdc, Foxp1, Bcl11b, Lig4, Ndfip1, Lef1, Paxip1, Tgfb1, Clcf1, Hspd1, Rag1, Ptprc, Stat6, Rnf168, Tcf7,
GO:0032321	positive regulation of Rh	0.00478 ( 16 of 3350 genes )	0.00153 ( 52 of 34011 annotated genes )	1.678e-05	0.07856	Pip5k1a, Myo9b, Arhgap15, Gsk3b, Arhgap1, Arhgap4, Ccr7, Scrib, Ralbp1, Ccl11, Gmip, Rap1gds1, Ndel1, Nckap1l, Arhgef10l, Sema4d,
GO:0002643	regulation of tolerance i	0.00209 ( 7 of 3350 genes )	0.00032 ( 11 of 34011 annotated genes )	1.679e-05	0.07859	Cd86, Tgfbr2, Ccr7, Foxp3, Cd3e, H2-Q1, Cblb,
GO:0051241	negative regulation of mu	0.01612 ( 54 of 3350 genes )	0.00926 ( 315 of 34011 annotated genes )	1.752e-05	0.08203	Mylip, Inpp5d, Gabbr1, Tlr2, Foxp3, Rara, Frzb, Atp2a1, Adam17, Npy2r, Ndfip1, Atp2a2, Sod1, Arrb2, Pten, Gba, Tgfb1, Rapgef4, Hsf1, Trim27, Atad1, Adrbk1, Notch1, Tspo, Vegfa, Nfkb1, Csk, Atp1a1, Map2k5, Pik3r1, Stxbp1, Hmgcr, P2rx4, Wnk1, Tgfbr2, Bcl2, Rgs2, Anxa5, Dusp10, Lrrk2, Lef1, Npy5r, Bcor, Il10, Trim30a, Fxn, Grid2ip, Cyba, Gnai2, Il20rb, Mgea5, Nckap1l, Slc37a4, Ptch1,
GO:0051346	negative regulation of hy	0.01612 ( 54 of 3350 genes )	0.00926 ( 315 of 34011 annotated genes )	1.752e-05	0.08203	Pcid2, Hspa5, Lmtk3, Igbp1, Sfi1, Birc6, Arfgef1, Prdx3, Cflar, Nr4a1, Usp47, Rrp1b, Gpi1, Arrb2, Cep192, Pxk, Ptma, Oxa1l, Col28a1, Hbxip, Pttg1, Vegfa, Sema4d, Spink10, Lrrc68, Akt2, Map2k5, Rbm26, 8030411F24Rik, Fkbp1a, Gpx1, Zcchc9, Wnk1, Prol1, Cst3, Rgs2, Mphosph10, Ubn1, Cd27, Lrrk2, Lef1, Gmip, Rag1, Csnk2a1, Tnnt2, Serpina6, Dlg2, Rps6ka1, Nckap1l, Gpatch2, Reck, Por, Stfa2l1, Ints1,
GO:0006006	glucose metabolic process	0.01045 ( 35 of 3350 genes )	0.00512 ( 174 of 34011 annotated genes )	1.77e-05	0.08283	Arpp19, Prkaa1, Pgm3, Fabp5, Taldo1, Hsd11b1, Entpd5, Foxo1, Ldha, Gpi1, Hdac4, Igfbp3, Ugp2, Aldoa, Pfkp, Pdha2, Akt2, Pik3r1, Cacna1a, Ppp1cb, Hk1, Ogdh, Pdha1, Mif, Ppp1ca, G6pc3, Pdk1, Ncor1, Ppp1r3b, Sik1, Acadm, Sorbs1, Mapk14, Glyr1, Pgam1,
GO:0002517	T cell tolerance inductio	0.00179 ( 6 of 3350 genes )	0.00024 ( 8 of 34011 annotated genes )	1.784e-05	0.0835	Cd86, Tgfbr2, Foxp3, Cd3e, H2-Q1, Cblb,
GO:0002664	regulation of T cell tole	0.00179 ( 6 of 3350 genes )	0.00024 ( 8 of 34011 annotated genes )	1.784e-05	0.0835	Cd86, Tgfbr2, Foxp3, Cd3e, H2-Q1, Cblb,
GO:0006172	ADP biosynthetic process	0.00179 ( 6 of 3350 genes )	0.00024 ( 8 of 34011 annotated genes )	1.784e-05	0.0835	Ak2, Atp5e, Ak3, Ak1, Atp5a1, Atp5b,
GO:0016358	dendrite development	0.00836 ( 28 of 3350 genes )	0.00370 ( 126 of 34011 annotated genes )	1.789e-05	0.08375	Syne1, Caprin1, Gsk3b, Fyn, Cacna1a, Dlg4, Ywhah, Anapc2, Epha5, Ngef, Ilk, Tnik, Sez6, Prex1, Picalm, Kidins220, Mcf2, Ppp1r9b, Lrrk2, Numb, Pten, Igsf9, Rapgef4, Actr3, Dab1, Sipa1l1, Sema3a, Sema4d,
GO:0000380	alternative nuclear mRNA	0.00328 ( 11 of 3350 genes )	0.00079 ( 27 of 34011 annotated genes )	1.809e-05	0.08467	Ddx5, Sfpq, Cdk13, Rbmy1a1, Mbnl1, Rbm25, Ptbp1, D11Bwg0517e, Rbm5, Hnrnpm, Hnrnpa1,
GO:0030048	actin filament-based move	0.00328 ( 11 of 3350 genes )	0.00079 ( 27 of 34011 annotated genes )	1.809e-05	0.08467	Myh10, Myl6, Tnnc1, Myo9b, Apbb2, Wasl, Tnnt2, Myo1b, Myh9, Wasf2, Evl,
GO:0007507	heart development	0.01851 ( 62 of 3350 genes )	0.01111 ( 378 of 34011 annotated genes )	1.814e-05	0.08489	Col4a3bp, Baz1b, Casp8, Ncor2, Itga4, Rara, Foxp1, Stra6, Smad7, Psen1, Fgfr2, Npy2r, Gja5, Pbrm1, Id2, Trp53bp2, Stk4, Egln1, Setd2, Pten, Tnnc1, Ttn, Sox17, Smad2, Chd7, Med12, Atg7, Notch2, Nfatc1, Adrbk1, Ece1, Ppp3cb, Notch1, Med1, Lrp6, Pitx2, Vegfa, Myh10, Nfatc3, Map2k5, Prkdc, Calcrl, Ep300, Nipbl, Fkbp1a, Frs2, Tgfbr2, Rtn4, Ly6e, Dvl3, Rbpj, Npy5r, Dicer1, Sik1, Bcor, Sin3b, Acadm, Tnn…
GO:0009314	response to radiation	0.01343 ( 45 of 3350 genes )	0.00726 ( 247 of 34011 annotated genes )	1.825e-05	0.08543	Uaca, Rfwd3, Ino80, Chek2, Uimc1, Rela, Ercc3, Wrn, Ogg1, Usp28, Usp47, Ube2b, Trp53bp2, Ruvbl2, Casp9, Dynlrb1, Obfc2a, Cacna1c, Ercc5, Trpm1, Bax, Rgs9bp, Rgs14, Trp53, Brca1, Rnf168, Eya3, Pde1b, Rad54l, Pik3r1, Nipbl, Prkdc, Brcc3, Gpx1, Hmgcr, Hoxa1, Gnb1, Lig4, Bcl2, Cds2, Paxip1, Sdf4, Ptprc, Mapk14, Lrp2,
GO:0046634	regulation of alpha-beta	0.00507 ( 17 of 3350 genes )	0.00171 ( 58 of 34011 annotated genes )	1.886e-05	0.0883	Foxp3, Ap3b1, Rara, Cblb, Itpkb, Tgfbr2, Ccr7, Hsph1, Ikzf1, Cd3e, Il4ra, Zbtb7b, Zap70, Ptprc, Nckap1l, Il2rg, Tnfrsf14,
GO:0010741	negative regulation of in	0.00687 ( 23 of 3350 genes )	0.00276 ( 94 of 34011 annotated genes )	1.92e-05	0.0899	Csk, Plekha1, Igf1r, Igbp1, Nfkbid, Zmynd11, Stat1, Slc9a3r1, Foxo1, Dusp10, Ptpn6, Pten, Ncor1, Pafah1b1, Dab1, Lif, Neurod1, Ypel1, Cdc42se1, Rhoh, Rgs14, Apc, Psmd10,
GO:0001819	positive regulation of cy	0.01045 ( 35 of 3350 genes )	0.00515 ( 175 of 34011 annotated genes )	2.011e-05	0.09414	Tlr2, Irf3, Zc3hav1, Creb1, Foxp3, Rara, Adam17, Polr3a, Ccr7, Sod1, Prkd2, Tgfb1, Casp1, Cd3e, Il4ra, Polr3f, Il12rb1, Card11, C3, Zcchc11, Il17ra, Arfgef2, Ripk1, Pycard, Arnt, Akirin2, Mif, Polr3c, Ifnar1, Hspd1, Ccl5, Csf2, Malt1, Il20rb, Tbk1,
GO:0006302	double-strand break repai	0.00657 ( 22 of 3350 genes )	0.00259 ( 88 of 34011 annotated genes )	2.014e-05	0.09426	Rad54l, Ino80, Chek2, Uimc1, Smc5, Baz1b, Lig1, Prkdc, Brcc3, Lig4, Sod1, Ddx1, Rad50, Setx, Morf4l1, Obfc2a, Nsmce2, Trp53, Brca1, Rnf168, Lig3, Eya3,
GO:0071824	protein-DNA complex subun	0.00657 ( 22 of 3350 genes )	0.00259 ( 88 of 34011 annotated genes )	2.014e-05	0.09426	Baz1b, Tspyl2, Hjurp, Creb1, Hp1bp3, Ep300, Nap1l4, Brd2, H2afz, Rsf1, Atf7ip, Senp6, Cand1, Arid1a, Nat15, Npm1, Set, Smarcc2, Hells, Hist3h2a, Rnf4, Myst4,
GO:0051223	regulation of protein tra	0.01403 ( 47 of 3350 genes )	0.00773 ( 263 of 34011 annotated genes )	2.02e-05	0.09453	Uaca, Tlr2, Irf3, Uhmk1, Rph3al, Foxp3, Gsk3b, Ogg1, Lats1, Vamp4, Cherp, Ccr7, Ndfip1, Hsp90aa1, Xpo1, Tgfb1, Casp1, A930001N09Rik, Il4ra, Creb3, Med1, Hsp90ab1, Flna, Psmd10, Exoc4, Csk, Dnm1l, Pde2a, Ep300, Emd, Gapvd1, Tmem173, Smad4, Pycard, Dnajc1, Mif, Ubr5, Picalm, Rbm22, Lcp1, Lrp1, Rab8a, Il10, Cyld, Kcnn4, Mapk14, AF251705,
GO:0043405	regulation of MAP kinase	0.01164 ( 39 of 3350 genes )	0.00600 ( 204 of 34011 annotated genes )	2.086e-05	0.09765	Madd, Gsk3b, Psen1, Map2k2, Ccr7, Ilk, Sod1, Ptpn6, Map3k5, Prkcd, Cd81, Dusp19, Gba, Tgfb1, Spag9, Rgs14, Dusp1, Vegfa, Lax1, Csk, Map2k5, Ghr, Hmgcr, Trib1, Frs2, Pik3r6, Rgs2, Dusp10, Dusp7, Mif, Dvl3, Lrrk2, Stk38, Map4k2, Map2k7, Ptprc, Cspg4, Mapk8ip3, Magi3,
GO:0016032	viral reproduction	0.00836 ( 28 of 3350 genes )	0.00373 ( 127 of 34011 annotated genes )	2.088e-05	0.09774	Pfn1, Bat1a, Srpk2, Tap1, Ep300, Cul1, Hcfc1, Thoc5, Ripk1, Rsf1, Hdac1, Srpk1, Etf1, Ddx5, Zfp110, Vapb, Lef1, Dicer1, Tgfb1, Ccl5, Cd4, Tardbp, Creb3, Hbxip, Ifnb1, Thoc1, Sp100, Ppia,
GO:0002028	regulation of sodium ion	0.00388 ( 13 of 3350 genes )	0.00109 ( 37 of 34011 annotated genes )	2.109e-05	0.09871	Tesc, Atp1a1, Akt2, Tgfb1, Sik1, Ikbkb, Nedd4l, Ywhah, Gnas, Camk2d, P2rx4, Slc9a3r1, Ahcyl1,
GO:0070988	demethylation	0.00388 ( 13 of 3350 genes )	0.00109 ( 37 of 34011 annotated genes )	2.109e-05	0.09871	Kdm5c, Kdm1a, Kdm3a, Kdm4c, Phf8, Kdm5b, Cyp3a41a, Kdm2a, Alkbh1, Por, Kdm5d, Ube2b, Jhdm1d,
GO:0010721	negative regulation of ce	0.00716 ( 24 of 3350 genes )	0.00297 ( 101 of 34011 annotated genes )	2.16e-05	0.1011	Gsk3b, Frzb, Psen1, Ywhah, Arhgap4, Atf5, Wee2, Ttc3, Rtn4, Spg20, Id2, Lrrk2, Ctnna1, Pten, Dicer1, Tgfb1, Ppp2ca, Dab1, Ntrk3, Sema3a, Notch1, Tspo, Trp53, Rufy3,
GO:0055002	striated muscle cell deve	0.00866 ( 29 of 3350 genes )	0.00394 ( 134 of 34011 annotated genes )	2.176e-05	0.1018	Myh10, Ppp3ca, Pik3r1, Homer1, Foxp1, Ep300, Gpx1, Cav2, Utrn, Fgfr2, Afg3l2, Bcl2, Ilk, Col4a1, Lrrk2, Hdac4, Lef1, Igfbp3, Ttn, Tgfb1, Sik1, Tnnt2, Cacna2d2, Actg1, Myog, Notch1, Mbnl3, Vegfa, Tpm1,
GO:0006304	DNA modification	0.00478 ( 16 of 3350 genes )	0.00156 ( 53 of 34011 annotated genes )	2.192e-05	0.1026	Tdrd1, Mll5, Ctcf, Atf7ip, Gsk3b, Mta2, Ehmt1, Gnas, Mll1, Hells, Alkbh1, Dnmt3a, Ascc3, Brca1, Dnmt3b, Dnmt1,
GO:0070663	regulation of leukocyte p	0.00955 ( 32 of 3350 genes )	0.00456 ( 155 of 34011 annotated genes )	2.309e-05	0.1081	Stat5b, Inpp5d, Foxp3, Ccr7, Ndfip1, Ptpn22, Spn, Ptpn6, Cd86, Tgfb1, Cd3e, Clcf1, Clec2i, Il12rb1, Il6st, Tnfrsf14, Card11, Nfatc2, Cblb, Ctla4, Bcl2, Mif, Dlg1, Ikzf3, Itgal, Il10, Ccl5, Coro1a, Zap70, Il20rb, Ptprc, Nckap1l,
GO:0006486	protein glycosylation	0.00746 ( 25 of 3350 genes )	0.00318 ( 108 of 34011 annotated genes )	2.373e-05	0.1111	Man2a1, B3galnt2, Stt3b, Psen1, B4galt1, Uggt1, Arfgef1, Entpd5, St8sia6, B3gnt2, St6gal2, Npc1, Poglut1, St3gal1, Alg12, Galnt1, Stt3a, St8sia1, Acer2, St6gal1, Oas2, Ogt, Mgea5, Rpn2, Galnt3,
GO:0043413	macromolecule glycosylati	0.00746 ( 25 of 3350 genes )	0.00318 ( 108 of 34011 annotated genes )	2.373e-05	0.1111	Man2a1, B3galnt2, Stt3b, Psen1, B4galt1, Uggt1, Arfgef1, Entpd5, St8sia6, B3gnt2, St6gal2, Npc1, Poglut1, St3gal1, Alg12, Galnt1, Stt3a, St8sia1, Acer2, St6gal1, Oas2, Ogt, Mgea5, Rpn2, Galnt3,
GO:0030852	regulation of granulocyte	0.00239 ( 8 of 3350 genes )	0.00044 ( 15 of 34011 annotated genes )	2.383e-05	0.1115	Inpp5d, Tesc, Runx1, Lef1, Mll5, Rara, Ogt, Ikzf1,
GO:0006520	cellular amino acid metab	0.01552 ( 52 of 3350 genes )	0.00891 ( 303 of 34011 annotated genes )	2.405e-05	0.1126	Stat5b, Mat2b, Mat2a, Tars2, Gars, Gsr, Rars2, Pdpr, Nars, Dnmt3a, Gstp2, Asl, Txnrd3, Sod1, Apip, Gad2, Ctps2, Atg7, Cars2, Dars, Chdh, Ido2, Dtd1, Qrsl1, Med1, Ass1, Eif5a, Farsb, Apc, Iars, Mars, Gart, Gpx4, Cacna1a, Sars, Ghr, Gpx1, P4ha1, Gsta1, Ddah2, Dnmt1, Comt1, Gpx3, Iars2, Shmt2, Adss, Ddah1, Txnrd1, Rars, Acadm, Ddc, Dnmt3b,
GO:0050864	regulation of B cell acti	0.00657 ( 22 of 3350 genes )	0.00262 ( 89 of 34011 annotated genes )	2.436e-05	0.114	Stat5b, Pcid2, Inpp5d, Nfatc2, Foxp3, Ctla4, Ndfip1, Bcl2, Id2, Mif, Ptpn6, Ikzf3, Tgfb1, Paxip1, Clcf1, Il10, Ptprc, Nckap1l, Stat6, Il2rg, Samsn1, Card11,
GO:0034243	regulation of transcripti	0.00269 ( 9 of 3350 genes )	0.00056 ( 19 of 34011 annotated genes )	2.475e-05	0.1159	Whsc2, Rdbp, Ezh2, Supt4h1, Cdc73, Paf1, Brd4, Leo1, Supt5h,
GO:0007276	gamete generation	0.01970 ( 66 of 3350 genes )	0.01217 ( 414 of 34011 annotated genes )	2.509e-05	0.1175	Tyro3, Kdm3a, Prm2, Rara, Wee2, Wbp7, Oas1d, Dnmt3a, Ube2b, Msh5, Sbf1, Hsf1, Rnf17, Ubr2, Celf1, Bik, Herc4, Nr2c2, Gpx4, Aff4, Prkdc, Rps6, Bcl2, Krt9, Dld, Mtap7, Txndc3, Ggnbp2, Mcm9, Rad23b, Theg, Pgm3, Clgn, Gsr, 4932438A13Rik, Sod1, Txnrd3, Apob, Bat3, Sox17, Tgfb1, Pafah1b1, Ggn, Bax, Adcyap1r1, Prm3, Notch1, Herc2, Tdrd1, Plekha1, B4galnt1, Agfg1, Adam18, Ssty1, Tial1, Csda, Mif, Fst, Qk…
GO:0006333	chromatin assembly or dis	0.00627 ( 21 of 3350 genes )	0.00244 ( 83 of 34011 annotated genes )	2.536e-05	0.1187	Baz1b, Tspyl2, Hjurp, Ctcf, Parp10, Hp1bp3, Nap1l4, Brd2, H2afz, Rsf1, Chd3, Arid1a, Nat15, Npm1, Set, Tlk1, Smarcc2, Hells, Hist3h2a, Myst4, Chd1,
GO:0008629	induction of apoptosis by	0.00537 ( 18 of 3350 genes )	0.00191 ( 65 of 34011 annotated genes )	2.551e-05	0.1194	Uaca, Chek2, Ep300, Usp28, Gpx1, Ikbke, Hipk1, Zfp622, Ddx5, Map3k5, 5730403B10Rik, Bat3, Sik1, Bax, Stk24, Brca1, Trp53, Ppp2r5c,
GO:0030330	DNA damage response, sign	0.00537 ( 18 of 3350 genes )	0.00191 ( 65 of 34011 annotated genes )	2.551e-05	0.1194	Ep300, Usp28, Ptprv, Hipk1, Mif, Ddx5, Ing4, Kdm1a, 5730403B10Rik, Bat3, Paxip1, Setd8, Casp2, Npm1, Trp53, Ppp2r5c, Psmd10, Sp100,
GO:0007018	microtubule-based movemen	0.00806 ( 27 of 3350 genes )	0.00359 ( 122 of 34011 annotated genes )	2.706e-05	0.1267	Kif20a, Rhot1, Klc1, Kif21b, Kif15, Tuba8, Kif2a, Igbp1, 1700019E19Rik, Tuba1b, Tuba1a, Ift46, Rhot2, Lrrc50, Dync2h1, Tuba1c, Sod1, Ndel1, Dynlrb1, Dnahc8, Pafah1b1, Dync1h1, Kif5b, Ktn1, Tuba4a, Dnahc5, Actr10,
GO:0045058	T cell selection	0.00328 ( 11 of 3350 genes )	0.00082 ( 28 of 34011 annotated genes )	2.722e-05	0.1274	Cd3e, Cd4, Zap70, Ptprc, Bcl11b, Itpkb, Ccr7, Bcl2, Spn, Card11, Dock2,
GO:0045930	negative regulation of mi	0.00328 ( 11 of 3350 genes )	0.00082 ( 28 of 34011 annotated genes )	2.722e-05	0.1274	Dlg1, Gas1, Cdkn1b, Tgfb1, Apbb2, Crlf3, Cdc73, Paf1, Bcl2, Usp47, Scrib,
GO:0044106	cellular amine metabolic	0.01881 ( 63 of 3350 genes )	0.01150 ( 391 of 34011 annotated genes )	2.727e-05	0.1277	Stat5b, Mat2b, Sms, Mat2a, Fabp5, Tars2, Pnpla6, Gars, Gsr, Rars2, Pdpr, Nars, Dnmt3a, Gstp2, Etnk1, Asl, Txnrd3, Sod1, Apip, Gad2, Ctps2, Scarb1, Atg7, Cars2, Dars, Chdh, Ido2, Dtd1, Qrsl1, Med1, Ass1, Eif5a, Pde1b, Farsb, Apc, Iars, Mars, Gpx4, Gart, Cacna1a, Sars, Ghr, Gpx1, P4ha1, Ly6e, Gsta1, Ddah2, Dnmt1, Comt1, Gpx3, Iars2, Shmt2, Adss, Chkb, Ddah1, Txnrd1, Rars, Oaz1, Agpat6, Acadm, Ddc, …
GO:0048659	smooth muscle cell prolif	0.00687 ( 23 of 3350 genes )	0.00282 ( 96 of 34011 annotated genes )	2.762e-05	0.1293	Stat5b, S1pr1, Pik3r1, Calcrl, Hmgcr, Trib1, Stat1, Fgfr2, Tgfbr2, Ilk, Id2, Comt1, Ralbp1, Naa35, Atp2b1, Igfbp3, Npy5r, Ccl5, Itgb3, Hbegf, Trp53, Akr1b3, Vegfa,
GO:0030031	cell projection assembly	0.01075 ( 36 of 3350 genes )	0.00544 ( 185 of 34011 annotated genes )	2.868e-05	0.1342	Ssh1, Sh3glb2, Wasl, Ssh2, Myo10, Ift46, Ccr7, Hsp90aa1, Ube2b, Als2cr4, Prkcd, Capzb, Actr3, Spata13, Gpm6a, Rock1, Flna, Sh3glb1, Itgb4, Apc, Ift172, Myh10, Ift140, Rac2, Slc9a3r1, Dync2h1, Ppp1r9b, Rdx, 1810046J19Rik, Wdr19, Ccl5, Rab8a, Itga6, Fuz, Wasf2, Nckap1,
GO:0030900	forebrain development	0.01373 ( 46 of 3350 genes )	0.00762 ( 259 of 34011 annotated genes )	2.884e-05	0.135	Tyro3, Ncor2, Kat2a, Creb1, Gsk3b, Tctn1, Psen1, Fgfr2, Bcl11b, Aldh1a3, Id2, Numb, Setd2, Pten, Ndel1, Atg7, Pafah1b1, Dab1, Bax, Notch1, Lrp6, Pitx2, Atrx, Myh10, Rfx4, Ptprs, Fyn, Frs2, Rtn4, Epha5, Foxp2, Dync2h1, Ywhae, Hdac1, Ikzf1, Kdm1a, Lrrk2, Agtpbp1, Lef1, Rbpj, Dicer1, Ncor1, Tcfap2c, Neurod1, Lrp2, Mapk8ip3,
GO:0032386	regulation of intracellul	0.01045 ( 35 of 3350 genes )	0.00523 ( 178 of 34011 annotated genes )	2.928e-05	0.1371	Uaca, Tlr2, Uhmk1, Gsk3b, Ogg1, Vamp4, Cherp, Hsp90aa1, Xpo1, Ppp1r12a, Tnnc1, Tgfb1, A930001N09Rik, Use1, Scfd1, Creb3, Ppp1cc, Flna, Hsp90ab1, Med1, Psmd10, Csk, Pde2a, Ep300, Emd, Smad4, Tmem173, Dhrs7c, Ubr5, Gas1, Rbm22, Lcp1, Tnnt2, Mapk14, Cyld,
GO:0042493	response to drug	0.01045 ( 35 of 3350 genes )	0.00523 ( 178 of 34011 annotated genes )	2.928e-05	0.1371	Tlr2, Srp68, Creb1, Prkcb, Mat2a, Slc22a18, Gnas, Adam17, Add3, Usp47, Npc1, Ube2b, Sod1, Mmp7, Hdac4, Casp1, Fos, Ei24, Ppp3cb, Trp53, Rad54l, Nfatc2, Atp1a1, Ppp3ca, Pde2a, Ep300, Kcnk3, Stat1, Tgfbr2, Bcl2, Lck, Pde4b, Nckap1l, Abcc2, Cdk4,
GO:0048524	positive regulation of vi	0.00358 ( 12 of 3350 genes )	0.00097 ( 33 of 34011 annotated genes )	2.941e-05	0.1377	Pfn1, Vapb, Lef1, Srpk2, Ep300, Ccl5, Tardbp, Ifnb1, Hdac1, Rsf1, Srpk1, Sp100,
GO:0051707	response to other organis	0.02299 ( 77 of 3350 genes )	0.01488 ( 506 of 34011 annotated genes )	2.968e-05	0.1389	Stat5b, Zc3hav1, Otud5, Il25, Wasl, Rara, Mapkapk2, Adam17, Ddx60, Ccr7, Spn, Adh5, Apobec3, Mmp7, Hsf1, Oas1b, Il12rb1, Ddx21, Cd47, H2-K1, Gpx1, Stat1, Crebzf, Bcl2, Bst2, Tmem173, H2-Q1, Pycard, Ifnar1, Ncf2, Rbpj, Ccl5, Il10, Ptprc, Pde4b, Paf1, Ifnb1, Tbk1, Tlr2, Irf3, Rela, Chuk, Irak2, Cdc73, Pcbp2, Abr, Prdx3, Cd86, Ddx1, Mill2, Irgm2, Tgfb1, Casp1, Scarb1, Scd1, Polr3f, Creb3, Notch1, Bc…
GO:0051402	neuron apoptosis	0.01015 ( 34 of 3350 genes )	0.00503 ( 171 of 34011 annotated genes )	2.975e-05	0.1393	Tyro3, Psen1, Prdx3, Cdc34, Ilk, Hsph1, Sod1, Rasa1, Gpi1, Casp9, Clcf1, Ppt1, Bax, Rock1, Alkbh1, Hsp90ab1, Trp53, Itsn1, Cacna1a, Srpk2, Dnajc5, Stxbp1, Gpx1, Lig4, Bcl2, Hdac1, Park7, Zfp110, Ncf2, Braf, Casp2, Agap2, Set, Map2k7,
GO:0030879	mammary gland development	0.00776 ( 26 of 3350 genes )	0.00341 ( 116 of 34011 annotated genes )	2.998e-05	0.1403	Usf2, Stat5b, Creb1, Igf1r, Frzb, Chuk, Gpx1, B4galt1, Fgfr2, Tgfbr2, Id2, Scrib, Ccl11, Lef1, Tgfb1, Agpat6, Tcfap2c, Agap2, Ncoa3, Bax, Stat6, Lrp6, Med1, Vegfa, Ptch1, Deaf1,
GO:0048638	regulation of development	0.00776 ( 26 of 3350 genes )	0.00341 ( 116 of 34011 annotated genes )	2.998e-05	0.1403	C3, Nipbl, Foxp1, Ep300, Anapc2, Arhgap4, Fgfr2, Tgfbr2, Rtn4, Spg20, Ilk, 2400003C14Rik, Dlg1, Rbpj, Trpv2, Ndel1, Islr2, Pafah1b1, Ntrk3, Fxn, Sema3a, Barhl2, Cdh4, Notch1, Por, Sema4d,
GO:0021915	neural tube development	0.00925 ( 31 of 3350 genes )	0.00441 ( 150 of 34011 annotated genes )	3.008e-05	0.1408	Ift172, Cfl1, Pfn1, Opa1, Casp8, Vasp, Kat2a, Tctn1, Psen1, Pax7, Hectd1, Scrib, Rgma, Stk4, Dvl3, Gas1, Setd2, Sox17, Wdr19, Med12, Ambra1, Notch1, Lrp6, Ptk7, Fuz, Tcf7, Sall4, Ptch1, Rock2, Deaf1, Nckap1,
GO:0035264	multicellular organism gr	0.00925 ( 31 of 3350 genes )	0.00441 ( 150 of 34011 annotated genes )	3.008e-05	0.1408	Stat5b, Rpl29, Kat2a, Creb1, Plekha1, Rara, Unc79, Nipbl, Ghr, Gnas, Ankrd11, Fgfr2, Afg3l2, Bcl2, Ikzf1, Sod1, Dlg1, Dicer1, Ncor1, Chd7, Hsf1, Agpat6, Ercc5, Fxn, Cacna2d2, Ncoa3, Add1, Gigyf2, Trp53, Ptch1, Celf1,
GO:0009101	glycoprotein biosynthetic	0.00955 ( 32 of 3350 genes )	0.00462 ( 157 of 34011 annotated genes )	3.018e-05	0.1413	B3galnt2, Stt3b, Psen1, Entpd5, Arfgef1, B3gnt2, St6gal2, Npc1, Soat1, Poglut1, Alg12, Galnt1, St8sia1, Itm2b, Rpn2, Man2a1, Csgalnact2, Aatf, Ep300, B4galt1, Uggt1, St8sia6, Bcl2, St3gal1, Acer2, Stt3a, Oas2, Ogt, St6gal1, Mgea5, Hbegf, Galnt3,
GO:0006954	inflammatory response	0.01791 ( 60 of 3350 genes )	0.01085 ( 369 of 34011 annotated genes )	3.184e-05	0.149	Uaca, Tyro3, Stat5b, Itgb2, Tlr2, Rela, Il25, Foxp3, Mapkapk2, Nfkbiz, Nfkbid, Plaa, Ccr7, Abr, Adora3, Ndfip1, Spn, Parp4, Ano6, Ccl11, Lat, Tgfb1, Sigirr, Clcf1, Notch2, Il4ra, Stk39, Pxk, Cr1l, Notch1, Bcr, Itgb6, Gpx4, C3, Cd47, Psma1, Pde2a, Calcrl, Alox5, B4galt1, Gpx1, Cxcl3, Orm1, Park7, Dusp10, Pycard, Mif, Ccrl2, Rbpj, Npy5r, Hspd1, Psmb4, Ccl5, Il10, Orm2, Cyba, Ctla2a, Il20rb, Pik3cd,…
GO:0050730	regulation of peptidyl-ty	0.00836 ( 28 of 3350 genes )	0.00382 ( 130 of 34011 annotated genes )	3.277e-05	0.1534	Itgb2, Ghr, Mif, Ptpn6, Prkcd, Arrb2, Cd81, Hcls1, Cd3e, Clcf1, Pecam1, Tnk2, Ccl5, Cd4, Itgb3, Lck, Lif, Csf2, Ptprc, Pak2, Trp53, Cspg4, Il6st, Vegfa, Tnfrsf14, Sema4d, Samsn1, Rictor,
GO:0018130	heterocycle biosynthetic	0.01642 ( 55 of 3350 genes )	0.00970 ( 330 of 34011 annotated genes )	3.325e-05	0.1557	Mat2b, Gabbr1, S1pr4, Pcbd2, Mat2a, Ak1, Atp2a1, Gars, Atic, Gnas, Npy2r, Umps, Atp2a2, Atp5b, Ak2, Ireb2, Atp12a, Mocos, Ctps2, Tgfb1, Ldhd, Aldoa, Atp5a1, Adcy6, Gnai3, Atp5o, Atp5g3, Adcyap1r1, Flna, Atp5h, Paics, Mthfd1l, S1pr1, Atp1a1, Gart, Gna13, Cox10, Pde2a, Atp2c1, Calcrl, Slc25a39, Atp1b1, Atp5e, Slc9a3r1, Oprd1, Npr2, Mc2r, Adss, Txndc3, Ak3, Nme2, Fxn, Ddc, Oas2, Gnai2,
GO:0006874	cellular calcium ion home	0.01343 ( 45 of 3350 genes )	0.00744 ( 253 of 34011 annotated genes )	3.373e-05	0.1579	Immt, Cul5, Cd52, Prkcb, Plcd1, Atp2a1, Psen1, Cherp, Npy2r, Ryr3, Atp2a2, Slc30a1, Fis1, Vapb, Tgfb1, Cacna1c, Bax, Adcyap1r1, Lrp6, Il6st, Trpc2, S1pr1, Bcap31, Gna13, Cacna1a, Atp2c1, Fkbp1a, Kcnk3, Gnb1, Cxcl3, P2rx4, Bcl2, Dhrs7c, Itpr1, Diap1, Ccl5, Itgb3, Lck, Ptprc, Cacna1g, Mgea5, Dbi, Slc37a4, Gtf2i, Sypl2,
GO:0003012	muscle system process	0.01134 ( 38 of 3350 genes )	0.00591 ( 201 of 34011 annotated genes )	3.415e-05	0.1599	Col4a3bp, Inpp5f, Atp2a1, Smad7, Anxa6, Npy2r, Gja5, Ryr3, Mtpn, Atp2a2, Sod1, Tshz3, Hdac4, Tnnc1, Ttn, Aldoa, Myom1, Akap13, Cacna1c, Adrbk1, Atp1a1, Ppp3ca, Homer1, Calcrl, Fkbp1a, Myh1, Camk2d, P2rx4, Rgs2, Dlg1, Myl6, Rap1gds1, Lck, Tnnt2, Cyba, Cacna1g, Mgea5, Tpm1,
GO:0006164	purine nucleotide biosynt	0.01254 ( 42 of 3350 genes )	0.00679 ( 231 of 34011 annotated genes )	3.574e-05	0.1673	Gabbr1, S1pr4, Ak1, Atp2a1, Atic, Gnas, Npy2r, Atp2a2, Atp5b, Ak2, Atp12a, Tgfb1, Ldhd, Aldoa, Atp5a1, Adcy6, Gnai3, Atp5o, Atp5g3, Adcyap1r1, Flna, Atp5h, Paics, S1pr1, Atp1a1, Gart, Gna13, Pde2a, Atp2c1, Calcrl, Atp1b1, Atp5e, Slc9a3r1, Oprd1, Npr2, Mc2r, Adss, Txndc3, Ak3, Nme2, Gnai2, Oas2,
GO:0072503	cellular divalent inorgan	0.01403 ( 47 of 3350 genes )	0.00791 ( 269 of 34011 annotated genes )	3.642e-05	0.1705	Immt, Cul5, Cd52, Prkcb, Plcd1, Atp2a1, Psen1, Cherp, Npy2r, Slc30a2, Ryr3, Atp2a2, Slc30a1, Fis1, Vapb, Tgfb1, Cacna1c, Bax, Adcyap1r1, Lrp6, Il6st, Trpc2, S1pr1, Bcap31, Gna13, Cacna1a, Atp2c1, Fkbp1a, Kcnk3, Gnb1, Cxcl3, P2rx4, Bcl2, Trpm7, Dhrs7c, Itpr1, Diap1, Ccl5, Itgb3, Lck, Ptprc, Cacna1g, Mgea5, Dbi, Slc37a4, Gtf2i, Sypl2,
GO:0048639	positive regulation of de	0.00418 ( 14 of 3350 genes )	0.00129 ( 44 of 34011 annotated genes )	3.685e-05	0.1725	Dlg1, C3, Trpv2, Ndel1, Islr2, Pafah1b1, Ep300, Ntrk3, Fxn, Anapc2, Cdh4, 2400003C14Rik, Ilk, Sema4d,
GO:0033151	V(D)J recombination	0.00209 ( 7 of 3350 genes )	0.00035 ( 12 of 34011 annotated genes )	3.695e-05	0.173	Bcl11b, Lig4, Lef1, Tcf7, Rag1, Prkdc, Foxp1,
GO:0043968	histone H2A acetylation	0.00209 ( 7 of 3350 genes )	0.00035 ( 12 of 34011 annotated genes )	3.695e-05	0.173	Yeats4, Ep400, Ruvbl2, Morf4l1, Brd8, Ing3, Epc1,
GO:0070997	neuron death	0.01045 ( 35 of 3350 genes )	0.00529 ( 180 of 34011 annotated genes )	3.736e-05	0.1749	Tyro3, Psen1, Prdx3, Cdc34, Ilk, Hsph1, Sod1, Rasa1, Gpi1, Casp9, Clcf1, Ppt1, Bax, Rock1, Alkbh1, Hsp90ab1, Trp53, Itsn1, Cacna1a, Srpk2, Dnajc5, Stxbp1, Gpx1, Lig4, Bcl2, Hdac1, Park7, Lrrk2, Zfp110, Ncf2, Braf, Casp2, Agap2, Set, Map2k7,
GO:0007283	spermatogenesis	0.01582 ( 53 of 3350 genes )	0.00929 ( 316 of 34011 annotated genes )	3.843e-05	0.1799	Tyro3, Kdm3a, Theg, Pgm3, Prm2, Clgn, Rara, Gsr, Dnmt3a, Ube2b, Txnrd3, Sod1, 4932438A13Rik, Apob, Sox17, Sbf1, Bat3, Hsf1, Pafah1b1, Rnf17, Ggn, Bax, Ubr2, Prm3, Adcyap1r1, Notch1, Herc2, Celf1, Bik, Herc4, Nr2c2, Tdrd1, Gpx4, Aff4, Plekha1, B4galnt1, Agfg1, Krt9, Adam18, Dld, Csda, Mif, Mtap7, Txndc3, Ggnbp2, Qk, Azi1, Inpp5b, Racgap1, Tle3, Rad23b, Psme4, Dazap1,
GO:0048232	male gamete generation	0.01582 ( 53 of 3350 genes )	0.00929 ( 316 of 34011 annotated genes )	3.843e-05	0.1799	Tyro3, Kdm3a, Theg, Pgm3, Prm2, Clgn, Rara, Gsr, Dnmt3a, Ube2b, Txnrd3, Sod1, 4932438A13Rik, Apob, Sox17, Sbf1, Bat3, Hsf1, Pafah1b1, Rnf17, Ggn, Bax, Ubr2, Prm3, Adcyap1r1, Notch1, Herc2, Celf1, Bik, Herc4, Nr2c2, Tdrd1, Gpx4, Aff4, Plekha1, B4galnt1, Agfg1, Krt9, Adam18, Dld, Csda, Mif, Mtap7, Txndc3, Ggnbp2, Qk, Azi1, Inpp5b, Racgap1, Tle3, Rad23b, Psme4, Dazap1,
GO:0051092	positive regulation of NF	0.00597 ( 20 of 3350 genes )	0.00232 ( 79 of 34011 annotated genes )	3.882e-05	0.1817	Rhebl1, Itgb2, Tlr2, Rela, Prkcb, Prkch, Irak2, Ube2v1, Rnf31, Prdx3, Ripk1, Pycard, Mtpn, Psma6, Prkd2, Ikbkb, Tgfb1, Npm1, Malt1, Card11,
GO:0019882	antigen processing and pr	0.00507 ( 17 of 3350 genes )	0.00179 ( 61 of 34011 annotated genes )	3.883e-05	0.1817	H2-D1, Tapbp, H2-Q2, H2-gs10, B2m, Bat3, Ap3b1, H2-K1, Tap1, H2-Q6, Calr, Ctse, Psmb9, Ccr7, H2-T23, H2-Q1, H2-Oa,
GO:0045792	negative regulation of ce	0.00896 ( 30 of 3350 genes )	0.00426 ( 145 of 34011 annotated genes )	3.921e-05	0.1835	Cfl1, Cdkn1b, Tspyl2, Frzb, Crlf3, Arhgap4, Rtn4, Spg20, Ndufa13, Gnb2l1, Eno1, Bcl2, Gng4, Smad4, Ppp1r9b, Gas1, Pten, Tgfb1, Sox17, Apbb2, Foxk1, Adipor2, Ppt1, Ei24, Sema3a, Cda, Trp53, Tm7sf4, Rbbp7, Phb,
GO:0050853	B cell receptor signaling	0.00328 ( 11 of 3350 genes )	0.00085 ( 29 of 34011 annotated genes )	4.007e-05	0.1876	Ptpn6, Nfatc2, Klhl6, Prkcb, Plekha1, Prkch, Lck, Ptprc, Ctla4, Nckap1l, Bcl2,
GO:0031057	negative regulation of hi	0.00269 ( 9 of 3350 genes )	0.00059 ( 20 of 34011 annotated genes )	4.119e-05	0.1928	Kdm1a, Kdm3a, Jarid2, Foxp3, Bcor, Brca1, Dnmt3b, Dnmt1, Ube2b,
GO:0042129	regulation of T cell prol	0.00716 ( 24 of 3350 genes )	0.00309 ( 105 of 34011 annotated genes )	4.262e-05	0.1995	Stat5b, Foxp3, Cblb, Ctla4, Ccr7, Ndfip1, Spn, Ptpn6, Cd86, Dlg1, Tgfb1, Cd3e, Itgal, Ccl5, Zap70, Coro1a, Ptprc, Il20rb, Nckap1l, Clec2i, Il12rb1, Il6st, Tnfrsf14, Card11,
GO:0002507	tolerance induction	0.00239 ( 8 of 3350 genes )	0.00047 ( 16 of 34011 annotated genes )	4.365e-05	0.2043	Cd86, Tgfb1, Foxp3, Cd3e, Cblb, Ccr7, Tgfbr2, H2-Q1,
GO:0006891	intra-Golgi vesicle-media	0.00239 ( 8 of 3350 genes )	0.00047 ( 16 of 34011 annotated genes )	4.365e-05	0.2043	Cog6, Copz1, Copg2, Golga4, Cog2, Cux1, Copb2, Copb1,
GO:0016578	histone deubiquitination	0.00239 ( 8 of 3350 genes )	0.00047 ( 16 of 34011 annotated genes )	4.365e-05	0.2043	Uimc1, Usp22, Kat2a, Atxn7, Brcc3, Mysm1, Usp3, Eny2,
GO:0002249	lymphocyte anergy	0.00149 ( 5 of 3350 genes )	0.00018 ( 6 of 34011 annotated genes )	4.375e-05	0.2048	Cd86, Foxp3, Cd3e, H2-Q1, Cblb,
GO:0002667	regulation of T cell aner	0.00149 ( 5 of 3350 genes )	0.00018 ( 6 of 34011 annotated genes )	4.375e-05	0.2048	Cd86, Foxp3, Cd3e, H2-Q1, Cblb,
GO:0002870	T cell anergy	0.00149 ( 5 of 3350 genes )	0.00018 ( 6 of 34011 annotated genes )	4.375e-05	0.2048	Cd86, Foxp3, Cd3e, H2-Q1, Cblb,
GO:0002911	regulation of lymphocyte	0.00149 ( 5 of 3350 genes )	0.00018 ( 6 of 34011 annotated genes )	4.375e-05	0.2048	Cd86, Foxp3, Cd3e, H2-Q1, Cblb,
GO:0051573	negative regulation of hi	0.00149 ( 5 of 3350 genes )	0.00018 ( 6 of 34011 annotated genes )	4.375e-05	0.2048	Kdm1a, Kdm3a, Dnmt3b, Brca1, Dnmt1,
GO:0006401	RNA catabolic process	0.00627 ( 21 of 3350 genes )	0.00253 ( 86 of 34011 annotated genes )	4.49e-05	0.2102	Lsm7, Dis3, Zhx2, Rnaseh2c, Dcp1a, Zcchc11, Upf2, Eif2c1, Etf1, Smg7, Papd5, Rbm8a, Smg1, Rnps1, Cnot6l, Patl1, Pabpc1, Oas2, C77370, Xrn1, Pnrc2,
GO:0001890	placenta development	0.00746 ( 25 of 3350 genes )	0.00329 ( 112 of 34011 annotated genes )	4.544e-05	0.2127	Pcdh12, Plcd1, Itga4, Sp3, Rps6, Nsdhl, Birc6, Fgfr2, Prdx3, Pbrm1, Stk4, Arnt, Egln1, Setd2, Lef1, Rbpj, Trim28, Hsf1, Il10, Lif, Csf2, Bptf, Alkbh1, Hsp90ab1, Med1,
GO:0071345	cellular response to cyto	0.01284 ( 43 of 3350 genes )	0.00709 ( 241 of 34011 annotated genes )	4.612e-05	0.2159	Stat5b, Rela, Irak2, Zc3h15, Ccr7, Hipk1, Tgtp1, Ptpn6, Gba, Sh2b2, Sigirr, Pafah1b1, Jak1, Stat6, Med1, Il12rb1, Tm7sf4, Il6st, Tcf7, Cdc37, Duox1, Il10rb, Zcchc11, Fkbp1a, Ghr, Il17ra, Nlrc5, Stat1, Il21r, Tmem173, Pycard, Ifi203, Ccrl2, Ifnar1, Klf6, Lef1, Rqcd1, Il1rl2, 5730403B10Rik, Il2rb, Ccl5, Ptprc, Phb,
GO:0045454	cell redox homeostasis	0.00478 ( 16 of 3350 genes )	0.00165 ( 56 of 34011 annotated genes )	4.662e-05	0.2182	Magt1, Txndc3, Ddit3, Dnajc16, 1810046J19Rik, Txnrd1, Sh3bgrl3, Sepw1, Gpx1, Glrx5, Gsr, Dnajc10, Krit1, Dld, Txnl1, Txnrd3,
GO:0019221	cytokine-mediated signali	0.01015 ( 34 of 3350 genes )	0.00515 ( 175 of 34011 annotated genes )	4.868e-05	0.2279	Stat5b, Rela, Irak2, Zc3h15, Ccr7, Hipk1, Ptpn6, Sh2b2, Sigirr, Pafah1b1, Jak1, Stat6, Med1, Il12rb1, Il6st, Cdc37, Duox1, Il10rb, Zcchc11, Fkbp1a, Ghr, Nlrc5, Stat1, Il21r, Pycard, Ccrl2, Ifnar1, Klf6, Rqcd1, Il1rl2, 5730403B10Rik, Il2rb, Ccl5, Ptprc,
GO:0007229	integrin-mediated signali	0.00567 ( 19 of 3350 genes )	0.00218 ( 74 of 34011 annotated genes )	4.873e-05	0.2281	Itgb6, Itgb2, Pram1, Itgae, Itga4, Adam17, Adamts13, Adam22, Ilk, Lat, Itgal, Cul3, Itgb3, Itga6, Cib2, Itgbl1, Vav1, Itgb4, Itgb7,
GO:0048814	regulation of dendrite mo	0.00418 ( 14 of 3350 genes )	0.00132 ( 45 of 34011 annotated genes )	4.882e-05	0.2285	Numb, Lrrk2, Pten, Syne1, Caprin1, Gsk3b, Actr3, Ywhah, Sipa1l1, Anapc2, Ilk, Ngef, Tnik, Sema4d,
GO:0002710	negative regulation of T	0.00179 ( 6 of 3350 genes )	0.00026 ( 9 of 34011 annotated genes )	4.916e-05	0.2301	Ptprc, Il20rb, Ppp3cb, Il7r, Foxp3, Spn,
GO:0009136	purine nucleoside diphosp	0.00179 ( 6 of 3350 genes )	0.00026 ( 9 of 34011 annotated genes )	4.916e-05	0.2301	Ak2, Atp5e, Ak3, Ak1, Atp5a1, Atp5b,
GO:0009180	purine ribonucleoside dip	0.00179 ( 6 of 3350 genes )	0.00026 ( 9 of 34011 annotated genes )	4.916e-05	0.2301	Ak2, Atp5e, Ak3, Ak1, Atp5a1, Atp5b,
GO:0030854	positive regulation of gr	0.00179 ( 6 of 3350 genes )	0.00026 ( 9 of 34011 annotated genes )	4.916e-05	0.2301	Tesc, Ogt, Runx1, Lef1, Mll5, Ikzf1,
GO:0051570	regulation of histone H3-	0.00179 ( 6 of 3350 genes )	0.00026 ( 9 of 34011 annotated genes )	4.916e-05	0.2301	Kdm1a, Kdm3a, Jarid2, Dnmt3b, Brca1, Dnmt1,
GO:0046425	regulation of JAK-STAT ca	0.00537 ( 18 of 3350 genes )	0.00200 ( 68 of 34011 annotated genes )	4.937e-05	0.2311	Ghr, Crlf3, Pigu, Hcls1, Sh2b2, Clcf1, Pecam1, Ccl5, Lck, Agap2, Dab1, Lif, Csf2, Neurod1, Elp2, Notch1, Akr1b3, Il6st,
GO:0048732	gland development	0.01343 ( 45 of 3350 genes )	0.00756 ( 257 of 34011 annotated genes )	4.994e-05	0.2338	Usf2, Stat5b, Creb1, Igf1r, Frzb, Chuk, Stra6, Fgfr2, Id2, Ube3a, Pten, Ccl11, Tgfb1, Bax, Notch1, Stat6, Med1, Lrp6, Pitx2, Vegfa, Psap, Apc, Deaf1, Cdkn1b, Wdr77, B4galt1, Gpx1, Frs2, Tgfbr2, Ly6e, Bcl2, Scrib, Smad4, Ikzf1, Kdm1a, Lama1, Lef1, Rbpj, Fkbp4, Agpat6, Tcfap2c, Agap2, Ncoa3, Sema3a, Ptch1,
GO:0048660	regulation of smooth musc	0.00657 ( 22 of 3350 genes )	0.00273 ( 93 of 34011 annotated genes )	5.032e-05	0.2356	Stat5b, S1pr1, Pik3r1, Calcrl, Hmgcr, Trib1, Stat1, Fgfr2, Tgfbr2, Ilk, Id2, Comt1, Ralbp1, Atp2b1, Igfbp3, Npy5r, Ccl5, Itgb3, Hbegf, Trp53, Akr1b3, Vegfa,
GO:0007005	mitochondrion organizatio	0.01134 ( 38 of 3350 genes )	0.00603 ( 205 of 34011 annotated genes )	5.334e-05	0.2497	Ict1, Col4a3bp, Golph3, Dctn6, Atp2a1, Cav2, Tk2, Prdx3, Hsp90aa1, Fis1, Mfn1, Tomm20, Oxa1l, Bax, Polg, Qrsl1, Trp53, Rnaseh1, Mtm1, Psmd10, Bik, Man2a1, Dnm1l, Mff, Opa1, Cox10, Yme1l1, Pde2a, Gpx1, Gfm1, Afg3l2, Park7, Lrrk2, Agtpbp1, Hspa4, Fxn, Samm50, Lig3,
GO:0002763	positive regulation of my	0.00388 ( 13 of 3350 genes )	0.00118 ( 40 of 34011 annotated genes )	5.418e-05	0.2536	Tesc, Runx1, Lef1, Mll5, Notch2, Itgb3, Ccl5, Lif, Gnas, Ogt, Id2, Tm7sf4, Ikzf1,
GO:0006575	cellular modified amino a	0.00776 ( 26 of 3350 genes )	0.00353 ( 120 of 34011 annotated genes )	5.54e-05	0.2593	Stat5b, Mat2b, Gpx4, Mat2a, Cacna1a, Gpx1, Ghr, P4ha1, Gsr, Gsta1, Dnmt3a, Gstp2, Asl, Ddah2, Dnmt1, Txnrd3, Sod1, Gpx3, Ddah1, Txnrd1, Chdh, Ido2, Med1, Ass1, Dnmt3b, Eif5a,
GO:0042177	negative regulation of pr	0.00358 ( 12 of 3350 genes )	0.00103 ( 35 of 34011 annotated genes )	5.769e-05	0.2701	Wac, Rela, Bat3, Ubxn1, Fyn, Il10, Agap2, Flna, Mdm4, Smad4, Banp, Mad2l1,
GO:0007091	mitotic metaphase/anaphas	0.00328 ( 11 of 3350 genes )	0.00088 ( 30 of 34011 annotated genes )	5.782e-05	0.2707	Pcid2, Terf1, Smc5, Cep192, Pten, Cdc23, 3200002M19Rik, Cdc27, Nsmce2, Mad2l1, Apc,
GO:0045814	negative regulation of ge	0.00328 ( 11 of 3350 genes )	0.00088 ( 30 of 34011 annotated genes )	5.782e-05	0.2707	Ubtf, Phf8, Mier1, Trim27, Epc1, Ubr2, Hells, Mll2, Dnmt3a, Dnmt3b, Ube2b,
GO:0006986	response to unfolded prot	0.00478 ( 16 of 3350 genes )	0.00168 ( 57 of 34011 annotated genes )	5.911e-05	0.2767	Ppp1r15a, Amfr, Hspa5, Edem3, Vapb, Ddit3, Tmbim6, Hspd1, A930001N09Rik, Upf2, Creb3, Ero1l, Hsp90aa1, Hsph1, Derl2, Dnajc3,
GO:0018107	peptidyl-threonine phosph	0.00478 ( 16 of 3350 genes )	0.00168 ( 57 of 34011 annotated genes )	5.911e-05	0.2767	Prkcd, Lrrk2, Tgfb1, Taf1, Prkcb, Pkn1, Gsk3b, Clk1, Smad7, Phip, Pdpk1, Adrbk1, Tgfbr2, Bcl2, Hk1, Nlk,
GO:0007259	JAK-STAT cascade	0.00657 ( 22 of 3350 genes )	0.00276 ( 94 of 34011 annotated genes )	5.983e-05	0.2801	Stat5b, Ghr, Crlf3, Stat1, Pigu, Hcls1, Sh2b2, Pecam1, Clcf1, Ccl5, Lck, Agap2, Dab1, Il15ra, Lif, Csf2, Neurod1, Elp2, Nlk, Notch1, Akr1b3, Il6st,
GO:0060541	respiratory system develo	0.01045 ( 35 of 3350 genes )	0.00541 ( 184 of 34011 annotated genes )	5.987e-05	0.2803	Man1a2, Sp3, Foxp1, Stra6, Hsd11b1, Fgfr2, Aldh1a3, Slc23a1, Cux1, Tns3, Tshz3, Numb, Smad2, Bat3, Chd7, Notch1, Lrp6, Ptk7, Pitx2, Vegfa, Man2a1, Lox, Ep300, Foxp2, Tgfbr2, l7Rn6, Gpsm2, Ppp1ca, Lef1, Lama1, Dicer1, Lif, Aimp2, Mapk8ip3, Numa1,
GO:0032870	cellular response to horm	0.01284 ( 43 of 3350 genes )	0.00717 ( 244 of 34011 annotated genes )	6.212e-05	0.2908	Stat5b, Kdm3a, Rela, Prkcb, Rara, Esrrg, Lats1, Sva, Foxo1, Ptpra, Nr4a1, Npc1, Prkcd, Ybx1, Tgfb1, Sh2b2, Nr2c1, Casp9, Adcy6, Pdpk1, Trim24, Eif4ebp1, Kat2b, Med1, Foxo4, Csk, Nr2c2, Akt2, Pik3r1, Prkdc, Ghr, Ptprv, Stat1, Srebf1, Ncf2, Zfp106, Lancl2, Adipor2, Phip, Parp1, Ogt, Sorbs1, Ncoa1,
GO:0046635	positive regulation of al	0.00418 ( 14 of 3350 genes )	0.00135 ( 46 of 34011 annotated genes )	6.404e-05	0.2998	Foxp3, Cd3e, Ap3b1, Rara, Il4ra, Zap70, Ptprc, Itpkb, Tgfbr2, Nckap1l, Ccr7, Hsph1, Ikzf1, Il2rg,
GO:0051320	S phase	0.00418 ( 14 of 3350 genes )	0.00135 ( 46 of 34011 annotated genes )	6.404e-05	0.2998	Ino80, Ezh2, Rcc1, Gas1, Apbb2, Crlf3, Cdc73, Ilkap, Ptprc, Paf1, C77370, Gigyf2, Crebbp, Anp32b,
GO:2000045	regulation of G1/S transi	0.00418 ( 14 of 3350 genes )	0.00135 ( 46 of 34011 annotated genes )	6.404e-05	0.2998	Rfwd3, Ptpn6, Ino80, Pten, Tgfb1, Rpl24, Casp2, Brd7, Rps6, Cdc73, Ptprv, Id2, Trp53, Ppp2r5c,
GO:0045185	maintenance of protein lo	0.00627 ( 21 of 3350 genes )	0.00259 ( 88 of 34011 annotated genes )	6.449e-05	0.3019	Tmsb10, Pfn1, Syne1, Tln1, Nuf2, Nin, Lats1, Bub3, Fbn2, Tnrc6a, Cd4, Cep57, Cer1, Creb3, Os9, Flna, Racgap1, Sgol1, Apc, Morc3, Psmd10,
GO:0010559	regulation of glycoprotei	0.00269 ( 9 of 3350 genes )	0.00062 ( 21 of 34011 annotated genes )	6.597e-05	0.3088	Ep300, Acer2, Aatf, Itm2b, Arfgef1, Mgea5, Bcl2, Hbegf, Soat1,
GO:0042255	ribosome assembly	0.00269 ( 9 of 3350 genes )	0.00062 ( 21 of 34011 annotated genes )	6.597e-05	0.3088	Rps2, Rpl24, Eftud1, Rps6, Rps25, Rps14, Rpsa, Rps17, Sbds,
GO:0046486	glycerolipid metabolic pr	0.01194 ( 40 of 3350 genes )	0.00653 ( 222 of 34011 annotated genes )	6.656e-05	0.3116	Inpp5d, Tmem188, Pi4k2a, Inpp5f, Pgap2, Fabp5, Pnpla6, Dgkd, Etnk1, Sacm1l, Pten, Cd81, Apob, Scarb1, Pigs, Mtm1, Il6st, Sh3glb1, Cdipt, Pip5k1a, Pikfyve, Gpx1, Srebf1, Acsl5, Smg1, Pigu, Sik1, Chkb, Inpp4b, Agpat6, Pip4k2a, Inpp5b, Pigk, Dbi, Pik3cd, Slc37a4, Fig4, Dgat1, Ces1d, Gnpat,
GO:0030308	negative regulation of ce	0.00836 ( 28 of 3350 genes )	0.00397 ( 135 of 34011 annotated genes )	6.666e-05	0.312	Cdkn1b, Tspyl2, Frzb, Crlf3, Arhgap4, Rtn4, Spg20, Ndufa13, Gnb2l1, Eno1, Bcl2, Gng4, Smad4, Gas1, Ppp1r9b, Tgfb1, Sox17, Apbb2, Foxk1, Adipor2, Ppt1, Ei24, Sema3a, Cda, Trp53, Tm7sf4, Rbbp7, Phb,
GO:0001892	embryonic placenta develo	0.00597 ( 20 of 3350 genes )	0.00241 ( 82 of 34011 annotated genes )	6.873e-05	0.3217	Pcdh12, Plcd1, Itga4, Sp3, Nsdhl, Birc6, Fgfr2, Stk4, Arnt, Egln1, Lef1, Setd2, Rbpj, Trim28, Hsf1, Il10, Lif, Csf2, Bptf, Med1,
GO:0048568	embryonic organ developme	0.01672 ( 56 of 3350 genes )	0.01020 ( 347 of 34011 annotated genes )	7.055e-05	0.3303	Pcdh12, Ldb1, Plcd1, Itga4, Zeb1, Sp3, Frzb, Stra6, Nsdhl, Birc6, Gnas, Fgfr2, Abr, Thoc5, Hipk1, Aldh1a3, Id2, Stk4, Sod1, Egln1, Setd2, Sox17, Smad2, Chd7, Hsf1, Bptf, Myst3, Med1, Lrp6, Ptk7, Pitx2, Bcr, Vegfa, Tcf7, Nipbl, Hoxa1, Frs2, Tgfbr2, Ptprq, Arnt, Dvl3, Dlg1, Kdm1a, Gas1, Runx1, Lef1, Rbpj, Wdr19, Trim28, Il10, Lif, Csf2, Neurod1, Mll1, Fuz, Nckap1,
GO:0048489	synaptic vesicle transpor	0.00448 ( 15 of 3350 genes )	0.00153 ( 52 of 34011 annotated genes )	7.073e-05	0.3311	Stx4a, Rims4, Cadps, Ap2b1, Stxbp1, Psen1, Dlg4, Ddc, Pfn2, Snapin, Fgfr2, Canx, Scrib, Cplx2, Dpysl2,
GO:0030111	regulation of Wnt recepto	0.00985 ( 33 of 3350 genes )	0.00503 ( 171 of 34011 annotated genes )	7.152e-05	0.3348	Tlr2, Trpm4, Lats1, Frzb, Dkk3, Cdc73, Fgfr2, Macf1, Csnk1d, Scyl2, Ilk, Als2cr4, Stk4, Zranb1, Chd8, Ddit3, Sox17, Med12, Notch1, Lrp6, Nfkb1, Apc, Ppm1a, Emd, Hdac1, Ubr5, Lef1, Lrp1, Csnk2a1, Mllt3, Nlk, Cyld, Cxxc4,
GO:0065004	protein-DNA complex assem	0.00567 ( 19 of 3350 genes )	0.00223 ( 76 of 34011 annotated genes )	7.226e-05	0.3383	Tspyl2, Hjurp, Creb1, Hp1bp3, Ep300, Nap1l4, Brd2, H2afz, Rsf1, Atf7ip, Cand1, Senp6, Nat15, Npm1, Set, Hist3h2a, Hells, Myst4, Rnf4,
GO:0006979	response to oxidative str	0.01075 ( 36 of 3350 genes )	0.00567 ( 193 of 34011 annotated genes )	7.232e-05	0.3385	Ucp2, Ercc3, Wrn, Ogg1, Psen1, Prdx3, Foxo1, Atox1, Sod1, Map3k5, Prkcd, Mill2, Fos, Adrbk1, Rgs14, Trp53, Nfkb1, Gpx4, Lig1, Plekha1, Gpx1, Ndufs2, Sin3a, Cst3, Bcl2, Oxsr1, Hdac1, Park7, Arnt, Gpx3, Lrrk2, Stx3, Txnrd1, Lck, Fxn, Ppp2cb,
GO:0032469	endoplasmic reticulum cal	0.00209 ( 7 of 3350 genes )	0.00038 ( 13 of 34011 annotated genes )	7.343e-05	0.3437	Itpr1, Fis1, Bax, Bcl2, Bcap31, Atp2a1, Psen1,
GO:0042100	B cell proliferation	0.00507 ( 17 of 3350 genes )	0.00188 ( 64 of 34011 annotated genes )	7.559e-05	0.3538	Inpp5d, Nfatc2, Ctla4, Bcl2, Mif, Cd27, Prkcd, Lef1, Ikzf3, Clcf1, Hspd1, Il10, Ptprc, Bax, Nckap1l, Il7r, Card11,
GO:0051789	response to protein stimu	0.00507 ( 17 of 3350 genes )	0.00188 ( 64 of 34011 annotated genes )	7.559e-05	0.3538	Ppp1r15a, Amfr, Hspa5, Edem3, Vapb, Ddit3, Tmbim6, Hspd1, A930001N09Rik, Stub1, Upf2, Creb3, Ero1l, Hsp90aa1, Hsph1, Derl2, Dnajc3,
GO:0050731	positive regulation of pe	0.00687 ( 23 of 3350 genes )	0.00300 ( 102 of 34011 annotated genes )	7.623e-05	0.3569	Ghr, Mif, Arrb2, Cd81, Hcls1, Cd3e, Clcf1, Pecam1, Tnk2, Ccl5, Cd4, Itgb3, Lck, Lif, Csf2, Pak2, Trp53, Cspg4, Il6st, Vegfa, Tnfrsf14, Sema4d, Rictor,
GO:0051651	maintenance of location i	0.00627 ( 21 of 3350 genes )	0.00262 ( 89 of 34011 annotated genes )	7.688e-05	0.3599	Syne1, Tln1, Nuf2, Nin, Lats1, Atp2a1, Bub3, Fbn2, Tnrc6a, Fth1, Cd4, Cep57, Cer1, Creb3, Os9, Flna, Sgol1, Racgap1, Apc, Morc3, Psmd10,
GO:0044283	small molecule biosynthet	0.02657 ( 89 of 3350 genes )	0.01829 ( 622 of 34011 annotated genes )	7.707e-05	0.3608	Kdm3a, Gabbr1, Prkaa1, Mat2a, Ak1, Atp2a1, Gars, Atic, Npy2r, Umps, Atp2a2, Asl, Atp5b, Apip, Gpi1, Ak2, Olah, Atp12a, Gba, Ldhd, Gnai3, Lta4h, Flna, Ass1, Akr1b3, Sh3glb1, Atp5h, Gart, Atp1a1, Gna13, Pde2a, Calcrl, Tecr, Alox5, Atp5e, Oprd1, G6pc3, Txndc3, Ddc, Oas2, Gnai2, Mat2b, Arpp19, S1pr4, Pgm3, H2-Ke6, Aloxe3, Gnas, Tk2, Foxo1, Fasn, Tsta3, Ctps2, Tgfb1, Scd1, Aldoa, Atp5a1, Adcy6, Atp5o,…
GO:0052548	regulation of endopeptida	0.01313 ( 44 of 3350 genes )	0.00747 ( 254 of 34011 annotated genes )	7.789e-05	0.3646	Uaca, Pcid2, Terf1, Hspa5, Igbp1, Birc6, Prdx3, Cflar, Nr4a1, Usp47, Map3k5, Fis1, Gpi1, Casp9, Psme3, Ptma, Bax, Hbxip, Pttg1, Vegfa, Nrd1, Rps3, Cdkn1b, Akt2, Map2k5, Bcap31, Gpx1, Prol1, Cst3, Pycard, Cd27, Akirin2, Lef1, Hspd1, Rag1, Csnk2a1, Acer2, Lck, Serpina6, Rps6ka1, Ifnb1, Reck, Por, Ints1,
GO:0006406	mRNA export from nucleus	0.00299 ( 10 of 3350 genes )	0.00076 ( 26 of 34011 annotated genes )	7.844e-05	0.3672	Nup160, Bat1a, Srsf10, Nxf1, Thoc5, Nup155, Thoc1, Eif5a, Pabpn1, Ddx39,
GO:0031577	spindle checkpoint	0.00299 ( 10 of 3350 genes )	0.00076 ( 26 of 34011 annotated genes )	7.844e-05	0.3672	Pcid2, Terf1, Cep192, Hsf1, 3200002M19Rik, Csnk2a1, Ndrg1, Bub3, Mad2l1, Apc,
GO:0035162	embryonic hemopoiesis	0.00299 ( 10 of 3350 genes )	0.00076 ( 26 of 34011 annotated genes )	7.844e-05	0.3672	Kdm1a, Runx1, Ldb1, Mll1, Tgfbr2, Thoc5, Med1, Myst3, Vegfa, Stk4,
GO:0006888	ER to Golgi vesicle-media	0.00358 ( 12 of 3350 genes )	0.00106 ( 36 of 34011 annotated genes )	7.905e-05	0.37	Vti1a, Gas1, Sec22b, Trappc2l, Cul3, Stx5a, Trappc3, Use1, Rab1, Scfd1, Sec24a, Nrbp1,
GO:0050772	positive regulation of ax	0.00418 ( 14 of 3350 genes )	0.00138 ( 47 of 34011 annotated genes )	8.323e-05	0.3896	Trpv2, Ndel1, Islr2, Pafah1b1, Ep300, Ntrk3, Fxn, Anapc2, Cdh4, Stk24, 2400003C14Rik, Ilk, Sema4d, Mif,
GO:0002699	positive regulation of im	0.00746 ( 25 of 3350 genes )	0.00341 ( 116 of 34011 annotated genes )	8.359e-05	0.3913	Stat5b, H2-D1, Cd37, Tlr2, C3, B2m, Foxp3, Rara, H2-K1, Tap1, Foxp1, Adora3, Ccr7, Mif, Pvr, Tgfb1, Paxip1, Clcf1, Hspd1, Il4ra, Pdpk1, Malt1, Ptprc, H2-T23, Stat6,
GO:0071375	cellular response to pept	0.00746 ( 25 of 3350 genes )	0.00341 ( 116 of 34011 annotated genes )	8.359e-05	0.3913	Stat5b, Foxo4, Csk, Rela, Akt2, Pik3r1, Prkcb, Prkdc, Ghr, Ptprv, Stat1, Srebf1, Foxo1, Ptpra, Prkcd, Zfp106, Ybx1, Sh2b2, Pdpk1, Phip, Eif4ebp1, Parp1, Ogt, Kat2b, Sorbs1,
GO:0030218	erythrocyte differentiati	0.00657 ( 22 of 3350 genes )	0.00282 ( 96 of 34011 annotated genes )	8.378e-05	0.3922	Stat5b, Inpp5d, Ldb1, Sp3, Ets1, Rps6, Exoc6, Id2, Kdm1a, Rcor1, Hcls1, Mll5, Ncor1, Pknox1, Maea, Add1, Nckap1l, Rps14, Med1, Mapk14, Vegfa, Rps19,
GO:0050900	leukocyte migration	0.00925 ( 31 of 3350 genes )	0.00465 ( 158 of 34011 annotated genes )	8.465e-05	0.3962	Sell, Itgb2, Tlr2, Myo9b, Trpm4, Msn, B4galt1, Adam17, Cxcl3, Adora3, Ccr7, Selplg, Sbds, Cklf, Stk10, Ccl11, Pecam1, Ccl5, Il16, Itgb3, Coro1a, Pde4b, Itga6, Rock1, Aimp1, Creb3, Nckap1l, Trp53, Slc37a4, Vegfa, Itgb7,
GO:0034404	nucleobase, nucleoside an	0.01433 ( 48 of 3350 genes )	0.00841 ( 286 of 34011 annotated genes )	8.523e-05	0.399	Mat2b, Gabbr1, S1pr4, Mat2a, Ak1, Atp2a1, Gars, Atic, Gnas, Tk2, Npy2r, Umps, Atp2a2, Atp5b, Ak2, Atp12a, Ctps2, Tgfb1, Ldhd, Aldoa, Atp5a1, Adcy6, Gnai3, Atp5o, Atp5g3, Adcyap1r1, Flna, Atp5h, Paics, S1pr1, Atp1a1, Gart, Gna13, Pde2a, Atp2c1, Calcrl, Atp1b1, Atp5e, Slc9a3r1, Oprd1, Npr2, Mc2r, Adss, Txndc3, Ak3, Nme2, Oas2, Gnai2,
GO:0034654	nucleobase, nucleoside, n	0.01433 ( 48 of 3350 genes )	0.00841 ( 286 of 34011 annotated genes )	8.523e-05	0.399	Mat2b, Gabbr1, S1pr4, Mat2a, Ak1, Atp2a1, Gars, Atic, Gnas, Tk2, Npy2r, Umps, Atp2a2, Atp5b, Ak2, Atp12a, Ctps2, Tgfb1, Ldhd, Aldoa, Atp5a1, Adcy6, Gnai3, Atp5o, Atp5g3, Adcyap1r1, Flna, Atp5h, Paics, S1pr1, Atp1a1, Gart, Gna13, Pde2a, Atp2c1, Calcrl, Atp1b1, Atp5e, Slc9a3r1, Oprd1, Npr2, Mc2r, Adss, Txndc3, Ak3, Nme2, Oas2, Gnai2,
GO:0002440	production of molecular m	0.00687 ( 23 of 3350 genes )	0.00303 ( 103 of 34011 annotated genes )	8.938e-05	0.4184	Lax1, Cd37, Tlr2, Trpm4, Foxp3, Prkdc, Foxp1, Lig4, Ndfip1, Mmp7, Mif, Cd27, Dlg1, Tgfb1, Paxip1, Clcf1, Hspd1, Il10, Malt1, Ptprc, Stat6, Il7r, Rnf168,
GO:0006997	nucleus organization	0.00448 ( 15 of 3350 genes )	0.00156 ( 53 of 34011 annotated genes )	9e-05	0.4213	Kdm3a, Mtap7, Zmpste24, Syne1, Prm2, Ndel1, Srpk2, Pafah1b1, Ets1, Tmem48, Bax, Wee2, Rrn3, Agfg1, Nup155,
GO:0050792	regulation of viral repro	0.00448 ( 15 of 3350 genes )	0.00156 ( 53 of 34011 annotated genes )	9e-05	0.4213	Ddx5, Pfn1, Vapb, Lef1, Dicer1, Srpk2, Ep300, Ccl5, Tardbp, Ifnb1, Hdac1, Rsf1, Srpk1, Sp100, Ppia,
GO:0006261	DNA-dependent DNA replica	0.00537 ( 18 of 3350 genes )	0.00209 ( 71 of 34011 annotated genes )	9.121e-05	0.427	Ino80, Lig1, Wrn, Smc3, Smc1a, Orc4, Tk2, Mcm6, Lig4, Stag2, Apitd1, Bmp5, C77370, Polg, Rnaseh1, Mcm4, Lig3, Helb,
GO:0007584	response to nutrient	0.00716 ( 24 of 3350 genes )	0.00323 ( 110 of 34011 annotated genes )	9.369e-05	0.4386	Usf2, Rara, Stat1, Aqp3, Tesc, Mill2, Snw1, Mtap7, Runx1, Suox, Mll5, Cd3e, Gdap2, Scamp3, Acer2, Trim24, Ogt, Add1, Med1, Lrp6, Ncoa1, Ptk7, Sp100, Ret,
GO:0030902	hindbrain development	0.00716 ( 24 of 3350 genes )	0.00323 ( 110 of 34011 annotated genes )	9.369e-05	0.4386	Myh10, Nr2c2, Hspa5, Egr2, Rfx4, Ldb1, Kat2a, Ptprs, Foxp3, Cacna1a, Hoxa1, Foxp2, Bcl2, Cntn1, Ezh2, Gas1, Lef1, Agtpbp1, Sdf4, Atg7, Dab1, Neurod1, Lrp6, Gnpat,
[truncated: 3,746 more rows]
