# Supplementary material for: The Y chromosome as a regulatory element shaping immune cell transcriptomes and susceptibility to autoimmune disease
Source: HighWire-hosted journal article supplement (doi:10.1101/gr.156703.113), 2013-06-25
Supplement: Supplemental_Tables.zip [file Table S4_B6_DiffExpressed.xlsx]

## Sheet: B6_DiffExpressed.txt
Table S4. GO term analysis on differentially expressed transcripts (FDR<0.05) from B6-ChrYSJL vs. B6 dataset. Terms with P<1.0E-3 are shown.
GOID	GO_term	Frequency	Genome frequency	P-value	Corrected P-value	Gene(s) Directly Annotated GOID list
GO:0009987	cellular process	0.68801 ( 505 of 734 genes )	0.39346 (13382 of 34011 annotated genes )	8.502e-60	1.658e-56	Dtx4, Ap3m1, Brd7, Slc9a9, Ndufa9, Krit1, Gnb2l1, Smarcad1, Uhrf2, Sfswap, Rassf2, Rpl7, Rbmy1a1, Ttn, U2af1, Dync1h1, Rnf20, Phactr1, Uqcrh, Flna, Eif3k, Rps3, Spcs2, Hiat1, Dusp11, Mef2d, Ldlrap1, Nin, Mras, Eif4g2, Arhgdia, Nktr, Arhgap1, Psd4, Ly9, Idh3g, Eprs, Park7, Tbl1x, Slc16a8, Tcfap2b, Slc35b3, Vmn2r60, Olfr49, Rplp1, Kcnh5, Tas2r113, Pabpc1, Lgr5, Gnai2, Stxbp3a, Pak6, Eif3d, Nub1, La…
GO:0044237	cellular metabolic proces	0.48910 ( 359 of 734 genes )	0.22384 ( 7613 of 34011 annotated genes )	2.71e-57	5.285e-54	Brd7, Ndufa9, Gnb2l1, Smarcad1, Uhrf2, Sfswap, Rpl7, Rbmy1a1, Ttn, U2af1, Rnf20, Phactr1, Uqcrh, Flna, Eif3k, Rps3, Spcs2, Dusp11, Mef2d, Ldlrap1, Mras, Eif4g2, Nktr, Arhgap1, Idh3g, Eprs, Park7, Tbl1x, Tcfap2b, Rplp1, Kcnh5, Pabpc1, Gnai2, Pak6, Eif3d, Nub1, Setd1a, Rpl38, Madd, Agxt2, Srsf3, Rps16, Poli, Crtc2, Nek9, 4932438A13Rik, 1810074P20Rik, Cd81, Rad21, Xiap, Cbl, Rpl11, Med12, Atp5a1, Br…
GO:0044238	primary metabolic process	0.48229 ( 354 of 734 genes )	0.22525 ( 7661 of 34011 annotated genes )	5.958e-54	1.162e-50	Brd7, Gnb2l1, Smarcad1, Uhrf2, Sfswap, Rpl7, Rbmy1a1, Ttn, U2af1, Rnf20, Flna, Eif3k, Rps3, Spcs2, Dusp11, Mef2d, Ldlrap1, Mras, Eif4g2, Nktr, Arhgap1, Idh3g, Eprs, Park7, Tbl1x, Tcfap2b, Rplp1, Kcnh5, Pabpc1, Gnai2, Pak6, Eif3d, Nub1, Setd1a, Rpl38, Madd, Agxt2, Srsf3, Rps16, Poli, Crtc2, Nek9, 4932438A13Rik, 1810074P20Rik, Cd81, Rad21, Xiap, Cbl, Rpl11, Med12, Atp5a1, Brwd1, Psma5, Rasa3, Elp2,…
GO:0008152	metabolic process	0.52997 ( 389 of 734 genes )	0.26565 ( 9035 of 34011 annotated genes )	3.542e-53	6.906e-50	Cox4i1, Brd7, Ndufa9, Krit1, Gnb2l1, Smarcad1, Cryzl1, Uhrf2, Sfswap, Rpl7, Rbmy1a1, Ttn, U2af1, Rnf20, Phactr1, Uqcrh, Flna, Eif3k, Rps3, Spcs2, Dusp11, Mef2d, Ldlrap1, Mras, Eif4g2, Arhgdia, Nktr, Arhgap1, Idh3g, Eprs, Park7, Tbl1x, Tcfap2b, Rplp1, Kcnh5, Pabpc1, Gnai2, Pak6, Eif3d, Nub1, Setd1a, Rpl38, Madd, Agxt2, Srsf3, Rps16, Poli, Crtc2, Nek9, 4932438A13Rik, 1810074P20Rik, Cd81, Rad21, Xia…
GO:0044260	cellular macromolecule me	0.39782 ( 292 of 734 genes )	0.16512 ( 5616 of 34011 annotated genes )	2.832e-52	5.522e-49	Brd7, Gnb2l1, Smarcad1, Uhrf2, Sfswap, Rpl7, Rbmy1a1, Ttn, U2af1, Rnf20, Flna, Eif3k, Rps3, Spcs2, Dusp11, Mef2d, Ldlrap1, Eif4g2, Nktr, Eprs, Tbl1x, Tcfap2b, Rplp1, Kcnh5, Pabpc1, Gnai2, Pak6, Eif3d, Nub1, Setd1a, Rpl38, Madd, Srsf3, Rps16, Poli, Crtc2, Nek9, 1810074P20Rik, Cd81, Rad21, Xiap, Cbl, Rpl11, Med12, Brwd1, Psma5, Elp2, Pak2, Gtf2f1, Rnf152, D10Wsu52e, Ppib, Rpf1, Caprin1, Adck2, Vps3…
GO:0043170	macromolecule metabolic p	0.42643 ( 313 of 734 genes )	0.18900 ( 6428 of 34011 annotated genes )	1.144e-50	2.23e-47	Brd7, Gnb2l1, Smarcad1, Uhrf2, Sfswap, Rpl7, Rbmy1a1, Ttn, U2af1, Rnf20, Flna, Eif3k, Rps3, Spcs2, Dusp11, Mef2d, Ldlrap1, Eif4g2, Nktr, Eprs, Park7, Tbl1x, Tcfap2b, Rplp1, Kcnh5, Pabpc1, Gnai2, Pak6, Eif3d, Nub1, Setd1a, Rpl38, Madd, Srsf3, Rps16, Poli, Crtc2, Nek9, 1810074P20Rik, Cd81, Rad21, Xiap, Cbl, Rpl11, Med12, Brwd1, Psma5, Elp2, Add1, Pak2, Gtf2f1, Rnf152, D10Wsu52e, Ppib, Rpf1, Caprin1…
GO:0044267	cellular protein metaboli	0.26158 ( 192 of 734 genes )	0.08527 ( 2900 of 34011 annotated genes )	1.487e-46	2.9e-43	Rps24, Phpt1, Cog3, Rpl18a, Brd7, Gnb2l1, Smarcad1, Uhrf2, Rplp0, Rpl7, Hcls1, Grk6, Dnajb6, Ttn, Galnt1, Rnf20, Ccnk, Dnajc10, Trp53, Eif3k, Morc3, Rps3, Spcs2, Csk, Dusp11, Rps15, Eif4g2, Nktr, Rpl13, Rpsa, Eprs, Eef1a1, Kiss1r, Hdac1, Adam8, Tbl1x, St3gal1, Stt3a, Rplp1, Psmb4, Kcnh5, Gnai2, Psmb9, Pak6, Rps6ka3, Eif3d, Nub1, Setd1a, Rpl38, Madd, Snrk, Rps16, Rnf167, Nek9, 1810074P20Rik, Cd81,…
GO:0019538	protein metabolic process	0.28610 ( 210 of 734 genes )	0.10229 ( 3479 of 34011 annotated genes )	4.861e-45	9.479e-42	Rps24, Phpt1, Cog3, Rpl18a, Brd7, Gnb2l1, Smarcad1, Uhrf2, Rplp0, Rpl7, Parl, Hcls1, Grk6, Dnajb6, Ttn, Npepps, Galnt1, Rnf20, Ccnk, Dnajc10, Flna, Trp53, Eif3k, Morc3, Rps3, Spcs2, Csk, Dusp11, Rps15, Eif4g2, Nktr, Rpl13, Rpsa, Eprs, Eef1a1, Park7, Kiss1r, Hdac1, Adam8, Tbl1x, St3gal1, Stt3a, Rplp1, Psmb4, Kcnh5, Gnai2, Psmb9, Pak6, Rps6ka3, Eif3d, Nub1, Setd1a, Rpl38, Madd, Snrk, Rps16, Rnf167,…
GO:0010467	gene expression	0.28474 ( 209 of 734 genes )	0.11032 ( 3752 of 34011 annotated genes )	1.839e-39	3.586e-36	Rps24, Cog3, Rpl18a, Brd7, Cdc5l, Gnb2l1, Rplp0, Sfswap, Rpl7, Rbmy1a1, Dnajb6, Chd7, U2af1, Rnf20, Ccnk, Flna, Trp53, Eif3k, Ddx54, Nfkb1, Morc3, Rps3, Spcs2, Rps15, Mef2d, Rbmxrt, Eif4g2, Zbtb20, Rpl13, Rpsa, Eprs, Eef1a1, Park7, Hdac1, Adam8, Tbl1x, Tcfap2b, Supt16h, Rplp1, Kcnh5, Pabpc1, Itga6, Rps6ka3, Eif3d, Bloc1s2, Skap1, Rpl38, Malat1, Srsf3, Rps16, Mbtd1, Crtc2, Supt6h, 1810074P20Rik, S…
GO:0065007	biological regulation	0.46322 ( 340 of 734 genes )	0.27182 ( 9245 of 34011 annotated genes )	3.409e-29	6.648e-26	Dtx4, Brd7, Slc9a9, Krit1, Gnb2l1, Smarcad1, Uhrf2, Sfswap, Rassf2, Rbmy1a1, Ttn, Rnf20, Phactr1, Flna, Eif3k, Rps3, Mef2d, Ldlrap1, Nin, Mras, Eif4g2, Arhgdia, Arhgap1, Psd4, Idh3g, Park7, Tbl1x, Tcfap2b, Vmn2r60, Olfr49, Kcnh5, Tas2r113, Lgr5, Gnai2, Stxbp3a, Nub1, Lama2, Madd, Agxt2, Itga4, Srsf3, Anxa6, Crtc2, Copa, 4932438A13Rik, 1810074P20Rik, Cd81, Rad21, Xiap, Cbl, Med12, Atp5a1, Brwd1, A…
GO:0009059	macromolecule biosyntheti	0.24114 ( 177 of 734 genes )	0.10073 ( 3426 of 34011 annotated genes )	8.299e-29	1.618e-25	Rps24, Cog3, Rpl18a, Brd7, Cdc5l, Gnb2l1, Rplp0, Sfswap, Rpl7, Dnajb6, Chd7, Galnt1, Rnf20, Ccnk, Flna, Trp53, Eif3k, Ddx54, Nfkb1, Rps3, Rps15, Mef2d, Rbmxrt, Eif4g2, Zbtb20, Rpl13, Rpsa, Eprs, Eef1a1, Hdac1, Adam8, Tbl1x, Cd27, Tcfap2b, St3gal1, Supt16h, Stt3a, Rplp1, Kcnh5, Itga6, Rps6ka3, Eif3d, Bloc1s2, Skap1, Rpl38, Rps16, Poli, Mbtd1, Crtc2, Supt6h, 1810074P20Rik, Ssrp1, Rad21, Supt4h1, Rp…
GO:0034645	cellular macromolecule bi	0.23706 ( 174 of 734 genes )	0.09820 ( 3340 of 34011 annotated genes )	1.061e-28	2.069e-25	Rps24, Cog3, Rpl18a, Brd7, Cdc5l, Gnb2l1, Rplp0, Sfswap, Rpl7, Dnajb6, Chd7, Galnt1, Rnf20, Ccnk, Flna, Trp53, Eif3k, Ddx54, Nfkb1, Rps3, Rps15, Mef2d, Rbmxrt, Eif4g2, Zbtb20, Rpl13, Rpsa, Eprs, Eef1a1, Hdac1, Adam8, Tbl1x, Tcfap2b, St3gal1, Supt16h, Stt3a, Rplp1, Kcnh5, Itga6, Rps6ka3, Eif3d, Bloc1s2, Skap1, Rpl38, Rps16, Poli, Mbtd1, Crtc2, Supt6h, 1810074P20Rik, Ssrp1, Rad21, Supt4h1, Rpl11, M…
GO:0050789	regulation of biological	0.44550 ( 327 of 734 genes )	0.25965 ( 8831 of 34011 annotated genes )	3.232e-28	6.303e-25	Dtx4, Brd7, Krit1, Gnb2l1, Smarcad1, Uhrf2, Sfswap, Rassf2, Rbmy1a1, Ttn, Rnf20, Phactr1, Flna, Eif3k, Rps3, Mef2d, Ldlrap1, Mras, Eif4g2, Arhgdia, Arhgap1, Psd4, Idh3g, Park7, Tbl1x, Tcfap2b, Vmn2r60, Olfr49, Kcnh5, Tas2r113, Lgr5, Gnai2, Stxbp3a, Nub1, Lama2, Madd, Agxt2, Itga4, Srsf3, Anxa6, Crtc2, 4932438A13Rik, 1810074P20Rik, Cd81, Rad21, Xiap, Cbl, Med12, Atp5a1, Brwd1, Actr3, Rasa3, Elp2, …
GO:0006139	nucleobase, nucleoside, n	0.27520 ( 202 of 734 genes )	0.12602 ( 4286 of 34011 annotated genes )	5.38e-28	1.049e-24	Rps24, Zc3hav1, Brd7, Hsd11b1, Cdc5l, Gnb2l1, Smarcad1, Atp2a2, Sfswap, Rpl7, Rbmy1a1, Dnajb6, Chd7, U2af1, Rnf20, Ccnk, Dnajc10, Flna, Trp53, Ddx54, Nfkb1, Rps3, Rps15, Mef2d, Rbmxrt, Mras, Eif4g2, Arhgap1, Zbtb20, Rpsa, Idh3g, Eprs, Hdac1, Adam8, Tbl1x, Tcfap2b, Supt16h, Kcnh5, Pabpc1, Itga6, Gnai2, Rps6ka3, Bloc1s2, Skap1, Malat1, Srsf3, Rps16, Poli, Arhgap4, Mbtd1, Crtc2, Supt6h, 1810074P20Ri…
GO:0050794	regulation of cellular pr	0.42507 ( 312 of 734 genes )	0.24345 ( 8280 of 34011 annotated genes )	7.587e-28	1.479e-24	Dtx4, Brd7, Krit1, Gnb2l1, Smarcad1, Uhrf2, Sfswap, Rassf2, Rbmy1a1, Ttn, Rnf20, Phactr1, Flna, Eif3k, Rps3, Mef2d, Ldlrap1, Mras, Eif4g2, Arhgdia, Arhgap1, Psd4, Park7, Tbl1x, Tcfap2b, Vmn2r60, Olfr49, Kcnh5, Tas2r113, Lgr5, Gnai2, Stxbp3a, Nub1, Lama2, Madd, Agxt2, Itga4, Srsf3, Crtc2, 4932438A13Rik, 1810074P20Rik, Cd81, Rad21, Xiap, Cbl, Med12, Atp5a1, Brwd1, Actr3, Rasa3, Elp2, Add1, Olfr773,…
GO:0019222	regulation of metabolic p	0.28338 ( 208 of 734 genes )	0.13337 ( 4536 of 34011 annotated genes )	2.373e-27	4.627e-24	Phpt1, Cog3, Zc3hav1, Brd7, Hsd11b1, Cdc5l, Krit1, Gnb2l1, Smarcad1, Fis1, Sfswap, Rbmy1a1, Hcls1, Dnajb6, Ttn, Chd7, Rnf20, Ccnk, Phactr1, Dnajc10, Flna, Trp53, Eif3k, Ddx54, Nfkb1, Morc3, Rps3, Csk, Mef2d, Rbmxrt, Eif4g2, Arhgdia, Arhgap1, Zbtb20, Park7, Kiss1r, Hdac1, Adam8, Tbl1x, Cd27, Tcfap2b, Supt16h, Kcnh5, Itga6, Gnai2, Rps6ka3, Nub1, Bloc1s2, Skap1, Malat1, Madd, Agxt2, Arhgap4, Mbtd1, …
GO:0034641	cellular nitrogen compoun	0.28610 ( 210 of 734 genes )	0.13631 ( 4636 of 34011 annotated genes )	6.049e-27	1.18e-23	Rps24, Zc3hav1, Brd7, Hsd11b1, Cdc5l, Gnb2l1, Smarcad1, Atp2a2, Sfswap, Rpl7, Rbmy1a1, Dnajb6, Chd7, U2af1, Rnf20, Ccnk, Dnajc10, Flna, Trp53, Ddx54, Nfkb1, Rps3, Rps15, Mef2d, Rbmxrt, Mras, Eif4g2, Arhgap1, Zbtb20, Rpsa, Idh3g, Eprs, Hdac1, Adam8, Tbl1x, Tcfap2b, Supt16h, Kcnh5, Pabpc1, Itga6, Gnai2, Rps6ka3, Bloc1s2, Skap1, Malat1, Agxt2, Srsf3, Rps16, Poli, Arhgap4, Mbtd1, Crtc2, Supt6h, 18100…
GO:0006807	nitrogen compound metabol	0.28883 ( 212 of 734 genes )	0.13916 ( 4733 of 34011 annotated genes )	1.373e-26	2.677e-23	Rps24, Zc3hav1, Brd7, Hsd11b1, Cdc5l, Gnb2l1, Smarcad1, Atp2a2, Sfswap, Rpl7, Rbmy1a1, Dnajb6, Chd7, U2af1, Rnf20, Ccnk, Dnajc10, Flna, Trp53, Ddx54, Nfkb1, Rps3, Rps15, Mef2d, Rbmxrt, Mras, Eif4g2, Arhgap1, Zbtb20, Rpsa, Idh3g, Eprs, Hdac1, Adam8, Tbl1x, Tcfap2b, Supt16h, Kcnh5, Pabpc1, Itga6, Gnai2, Rps6ka3, Bloc1s2, Skap1, Malat1, Agxt2, Srsf3, Rps16, Poli, Arhgap4, Mbtd1, Crtc2, Supt6h, 49324…
GO:0006412	translation	0.07493 ( 55 of 734 genes )	0.01255 ( 427 of 34011 annotated genes )	1.841e-26	3.59e-23	Rps24, Rpl38, Rpl18a, Rps16, Eif4e1b, Rps11, Gnb2l1, Eef1b2, Rplp0, Ireb2, Rpl7, Eif1, Rpl11, Eif4a1, Patl1, Rps14, Eif3k, Rpl18, Eef2, Rps19, Rpl8, Rbm3, Rps3, Rpl29, Eif3b, Rps2, Rps15, Caprin1, Eif2c4, Rpl5, Eif4g2, Foxo3, Sars, Eef2k, Pa2g4, Rpl13, Eif4a3, Rpsa, Eef1a1, Eprs, Eif4b, Ppp1ca, Rps5, Rps4x, Eif4a2, Eef1e1, Rpl3, Eef1d, Rplp1, Rars, Mrps18b, Rps9, Il6, Eif3d, Rpl15,
GO:0031323	regulation of cellular me	0.25068 ( 184 of 734 genes )	0.11417 ( 3883 of 34011 annotated genes )	1.642e-25	3.203e-22	Zc3hav1, Brd7, Hsd11b1, Cdc5l, Gnb2l1, Smarcad1, Sfswap, Rbmy1a1, Hcls1, Dnajb6, Ttn, Chd7, Rnf20, Ccnk, Phactr1, Dnajc10, Flna, Trp53, Eif3k, Ddx54, Nfkb1, Rps3, Csk, Mef2d, Rbmxrt, Eif4g2, Arhgap1, Zbtb20, Kiss1r, Hdac1, Adam8, Tbl1x, Cd27, Tcfap2b, Supt16h, Kcnh5, Itga6, Gnai2, Rps6ka3, Nub1, Bloc1s2, Skap1, Malat1, Madd, Agxt2, Arhgap4, Mbtd1, Crtc2, Supt6h, 1810074P20Rik, Cd81, Ssrp1, Rad21,…
GO:0044249	cellular biosynthetic pro	0.26158 ( 192 of 734 genes )	0.12202 ( 4150 of 34011 annotated genes )	1.816e-25	3.54e-22	Rps24, Cog3, Rpl18a, Brd7, Hsd11b1, Cdc5l, Gnb2l1, Atp2a2, Rplp0, Sfswap, Rpl7, Dnajb6, Chd7, Galnt1, Rnf20, Ccnk, Flna, Trp53, Eif3k, Ddx54, Nfkb1, Rps3, Rps15, Mef2d, Rbmxrt, Eif4g2, Zbtb20, Rpl13, Rpsa, Eprs, Eef1a1, Hdac1, Adam8, Tbl1x, Cd27, Tcfap2b, St3gal1, Supt16h, Stt3a, Rplp1, Kcnh5, Lpcat3, Itga6, Gnai2, Rps6ka3, Eif3d, Bloc1s2, Skap1, Rpl38, Agxt2, Rps16, Poli, Mbtd1, Crtc2, Supt6h, 1…
GO:0080090	regulation of primary met	0.24659 ( 181 of 734 genes )	0.11152 ( 3793 of 34011 annotated genes )	2.083e-25	4.061e-22	Zc3hav1, Brd7, Hsd11b1, Cdc5l, Gnb2l1, Smarcad1, Sfswap, Rbmy1a1, Hcls1, Dnajb6, Ttn, Chd7, Rnf20, Ccnk, Dnajc10, Flna, Trp53, Eif3k, Ddx54, Nfkb1, Rps3, Csk, Mef2d, Rbmxrt, Eif4g2, Arhgap1, Zbtb20, Kiss1r, Hdac1, Adam8, Tbl1x, Tcfap2b, Supt16h, Kcnh5, Itga6, Gnai2, Rps6ka3, Nub1, Bloc1s2, Skap1, Malat1, Madd, Arhgap4, Mbtd1, Crtc2, Supt6h, 1810074P20Rik, Cd81, Ssrp1, Rad21, Supt4h1, Morf4l1, Med…
GO:0060255	regulation of macromolecu	0.24523 ( 180 of 734 genes )	0.11073 ( 3766 of 34011 annotated genes )	2.464e-25	4.805e-22	Cog3, Brd7, Hsd11b1, Cdc5l, Gnb2l1, Smarcad1, Sfswap, Rbmy1a1, Hcls1, Dnajb6, Ttn, Chd7, Rnf20, Ccnk, Dnajc10, Flna, Trp53, Eif3k, Ddx54, Nfkb1, Morc3, Rps3, Csk, Mef2d, Rbmxrt, Eif4g2, Zbtb20, Park7, Kiss1r, Hdac1, Adam8, Tbl1x, Cd27, Tcfap2b, Supt16h, Kcnh5, Itga6, Gnai2, Rps6ka3, Nub1, Bloc1s2, Skap1, Malat1, Madd, Mbtd1, Crtc2, Supt6h, 1810074P20Rik, Cd81, Ssrp1, Rad21, Supt4h1, Morf4l1, Med1…
GO:0009058	biosynthetic process	0.26431 ( 194 of 734 genes )	0.12543 ( 4266 of 34011 annotated genes )	7.494e-25	1.461e-21	Rps24, Cog3, Rpl18a, Brd7, Hsd11b1, Cdc5l, Gnb2l1, Atp2a2, Rplp0, Sfswap, Rpl7, Dnajb6, Chd7, Galnt1, Rnf20, Ccnk, Flna, Trp53, Eif3k, Ddx54, Nfkb1, Rps3, Rps15, Mef2d, Rbmxrt, Eif4g2, Zbtb20, Rpl13, Rpsa, Eprs, Eef1a1, Hdac1, Adam8, Tbl1x, Cd27, Tcfap2b, St3gal1, Supt16h, Stt3a, Rplp1, Kcnh5, Lpcat3, Itga6, Gnai2, Rps6ka3, Eif3d, Bloc1s2, Skap1, Rpl38, Agxt2, Rps16, Poli, Mbtd1, Crtc2, Supt6h, 1…
GO:0016070	RNA metabolic process	0.21526 ( 158 of 734 genes )	0.09182 ( 3123 of 34011 annotated genes )	1.541e-24	3.005e-21	Rps24, Brd7, Cdc5l, Sfswap, Rpl7, Rbmy1a1, Dnajb6, Chd7, U2af1, Rnf20, Ccnk, Flna, Trp53, Ddx54, Nfkb1, Rps3, Rps15, Mef2d, Rbmxrt, Eif4g2, Zbtb20, Rpsa, Eprs, Hdac1, Adam8, Tbl1x, Tcfap2b, Supt16h, Kcnh5, Pabpc1, Itga6, Rps6ka3, Bloc1s2, Skap1, Malat1, Srsf3, Rps16, Mbtd1, Crtc2, Supt6h, 1810074P20Rik, Ssrp1, Rad21, Supt4h1, Rpl11, Morf4l1, Med12, Brwd1, Atf7, Trim21, Nfat5, Elp2, Ddx17, Gtf2f1,…
GO:0071840	cellular component organi	0.23297 ( 171 of 734 genes )	0.10864 ( 3695 of 34011 annotated genes )	1.883e-22	3.671e-19	Rps24, Phpt1, Brd7, Appl1, Gnb2l1, Smarcad1, Bub3, Rplp0, Fis1, Rpl7, Parl, Dnajb6, Ttn, Chd7, Dync1h1, Rnf20, Ccnk, Use1, Uqcrh, Flna, Trp53, Get4, Csk, Rps15, Tln1, Ldlrap1, Rbmxrt, Nin, Nap1l4, Lsp1, Rpsa, Park7, Kiss1r, Hdac1, Adam8, Gabarap, Itga6, Sema3a, Stxbp3a, Eif3d, Lama2, Setd1a, Malat1, Rps16, Arhgap4, Mbtd1, Crtc2, Nek9, 4932438A13Rik, Rad21, Rpl11, Morf4l1, Brwd1, Actr3, Trim21, Ac…
GO:0006464	protein modification proc	0.16894 ( 124 of 734 genes )	0.06563 ( 2232 of 34011 annotated genes )	1.908e-22	3.721e-19	Cfl1, Phpt1, Cog3, Ptpn1, Brd7, Pdcd10, Ep400, Gnb2l1, Smarcad1, Uhrf2, Setd2, Prkd2, Hcls1, Grk6, Ttn, Ikbkb, Pecam1, Otub1, Galnt1, Rnf20, Pcgf1, Mysm1, Ccnk, Dnajc10, Trp53, Morc3, Sae1, Csk, Dusp11, Gpx1, Eef2k, Prkar1a, Loxl2, Inpp5k, Kiss1r, Hdac1, Adam8, Stk31, Ppp1ca, Ccnd3, Dlg1, Robld3, Hmgb1, St3gal1, Stt3a, Kcnh5, Dgka, Crbn, Gnai2, Mgea5, Pak6, Usp19, Rps6ka3, Nub1, Setd1a, Ube2i, Ts…
GO:0043412	macromolecule modificatio	0.17166 ( 126 of 734 genes )	0.06795 ( 2311 of 34011 annotated genes )	4.089e-22	7.973e-19	Cfl1, Phpt1, Cog3, Ptpn1, Brd7, Pdcd10, Ep400, Gnb2l1, Smarcad1, Uhrf2, Setd2, Prkd2, Hcls1, Grk6, Ttn, Ikbkb, Pecam1, Otub1, Galnt1, Rnf20, Pcgf1, Mysm1, Ccnk, Dnajc10, Trp53, Morc3, Sae1, Csk, Dusp11, Gpx1, Eef2k, Prkar1a, Loxl2, Inpp5k, Kiss1r, Hdac1, Adam8, Stk31, Ppp1ca, Ccnd3, Dlg1, Robld3, Hmgb1, St3gal1, Stt3a, Kcnh5, Rnmt, Dgka, Crbn, Gnai2, Mgea5, Pak6, Usp19, Rps6ka3, Nub1, Setd1a, Ube…
GO:0090304	nucleic acid metabolic pr	0.22343 ( 164 of 734 genes )	0.10308 ( 3506 of 34011 annotated genes )	6.068e-22	1.183e-18	Rps24, Brd7, Cdc5l, Smarcad1, Sfswap, Rpl7, Rbmy1a1, Dnajb6, Chd7, U2af1, Rnf20, Ccnk, Flna, Trp53, Ddx54, Nfkb1, Rps3, Rps15, Mef2d, Rbmxrt, Eif4g2, Zbtb20, Rpsa, Eprs, Hdac1, Adam8, Tbl1x, Tcfap2b, Supt16h, Kcnh5, Pabpc1, Itga6, Rps6ka3, Bloc1s2, Skap1, Malat1, Srsf3, Rps16, Poli, Mbtd1, Crtc2, Supt6h, 1810074P20Rik, Ssrp1, Rad21, Supt4h1, Rpl11, Morf4l1, Med12, Brwd1, Atf7, Trim21, Nfat5, Elp2…
GO:0010468	regulation of gene expres	0.20027 ( 147 of 734 genes )	0.08894 ( 3025 of 34011 annotated genes )	4.4e-21	8.58e-18	Cog3, Brd7, Cdc5l, Gnb2l1, Sfswap, Rbmy1a1, Dnajb6, Chd7, Rnf20, Ccnk, Flna, Trp53, Eif3k, Ddx54, Nfkb1, Morc3, Rps3, Mef2d, Rbmxrt, Eif4g2, Zbtb20, Park7, Hdac1, Adam8, Tbl1x, Tcfap2b, Supt16h, Kcnh5, Itga6, Rps6ka3, Bloc1s2, Skap1, Malat1, Mbtd1, Crtc2, Supt6h, 1810074P20Rik, Ssrp1, Rad21, Supt4h1, Morf4l1, Med12, Brwd1, Atf7, Trim21, Nfat5, Elp2, Ppp3cb, Ddx17, Gtf2f1, Tcf25, Rbm3, Eif3b, Capr…
GO:0071841	cellular component organi	0.19346 ( 142 of 734 genes )	0.08456 ( 2876 of 34011 annotated genes )	5.785e-21	1.128e-17	Rps24, Phpt1, Brd7, Smarcad1, Bub3, Rplp0, Fis1, Rpl7, Parl, Dnajb6, Ttn, Chd7, Dync1h1, Rnf20, Ccnk, Use1, Flna, Trp53, Get4, Rps15, Tln1, Rbmxrt, Nin, Nap1l4, Lsp1, Rpsa, Park7, Kiss1r, Hdac1, Gabarap, Itga6, Sema3a, Eif3d, Lama2, Setd1a, Malat1, Rps16, Arhgap4, Mbtd1, Nek9, Rad21, Rpl11, Morf4l1, Brwd1, Actr3, Actg1, Add1, Sgcg, Rpf1, Caprin1, Utrn, Rac2, Nid1, Tuba1c, Dock2, Mark2, Sdad1, Ogt…
GO:0051171	regulation of nitrogen co	0.19346 ( 142 of 734 genes )	0.08847 ( 3009 of 34011 annotated genes )	3.324e-19	6.481e-16	Zc3hav1, Brd7, Hsd11b1, Cdc5l, Gnb2l1, Smarcad1, Sfswap, Rbmy1a1, Dnajb6, Chd7, Rnf20, Ccnk, Dnajc10, Flna, Trp53, Ddx54, Nfkb1, Rps3, Mef2d, Rbmxrt, Arhgap1, Zbtb20, Hdac1, Adam8, Tbl1x, Tcfap2b, Supt16h, Kcnh5, Itga6, Gnai2, Rps6ka3, Bloc1s2, Skap1, Malat1, Agxt2, Arhgap4, Mbtd1, Crtc2, Supt6h, 1810074P20Rik, Ssrp1, Rad21, Supt4h1, Morf4l1, Med12, Brwd1, Atf7, Trim21, Nfat5, Rasa3, Elp2, Ddx17,…
GO:0019219	regulation of nucleobase,	0.19210 ( 141 of 734 genes )	0.08753 ( 2977 of 34011 annotated genes )	3.335e-19	6.504e-16	Zc3hav1, Brd7, Hsd11b1, Cdc5l, Gnb2l1, Smarcad1, Sfswap, Rbmy1a1, Dnajb6, Chd7, Rnf20, Ccnk, Dnajc10, Flna, Trp53, Ddx54, Nfkb1, Rps3, Mef2d, Rbmxrt, Arhgap1, Zbtb20, Hdac1, Adam8, Tbl1x, Tcfap2b, Supt16h, Kcnh5, Itga6, Gnai2, Rps6ka3, Bloc1s2, Skap1, Malat1, Arhgap4, Mbtd1, Crtc2, Supt6h, 1810074P20Rik, Ssrp1, Rad21, Supt4h1, Morf4l1, Med12, Brwd1, Atf7, Trim21, Nfat5, Rasa3, Elp2, Ddx17, Gtf2f1…
GO:0016043	cellular component organi	0.21526 ( 158 of 734 genes )	0.10476 ( 3563 of 34011 annotated genes )	7.409e-19	1.445e-15	Phpt1, Brd7, Appl1, Gnb2l1, Smarcad1, Bub3, Fis1, Parl, Dnajb6, Ttn, Chd7, Dync1h1, Rnf20, Ccnk, Use1, Uqcrh, Flna, Trp53, Get4, Csk, Rps15, Tln1, Ldlrap1, Rbmxrt, Nin, Nap1l4, Lsp1, Rpsa, Park7, Kiss1r, Hdac1, Adam8, Gabarap, Itga6, Sema3a, Stxbp3a, Eif3d, Lama2, Setd1a, Malat1, Arhgap4, Mbtd1, Crtc2, Nek9, 4932438A13Rik, Rad21, Morf4l1, Brwd1, Actr3, Trim21, Actg1, Add1, Sgcg, Caprin1, Utrn, Ra…
GO:0006996	organelle organization	0.13760 ( 101 of 734 genes )	0.05448 ( 1853 of 34011 annotated genes )	1.011e-17	1.971e-14	Col4a3bp, Cfl1, Phpt1, Ptpn1, Brd7, Rps25, Ep400, Tfam, Smarcad1, Bub3, Hook1, Fis1, Setd2, Parl, Dnajb6, Ttn, Chd7, Rnf20, Pcgf1, Mysm1, Ccnk, Use1, Flii, Mfn2, Flna, Trp53, Acin1, Get4, Gpx4, Rps2, Rps15, Tln1, Nin, Nap1l4, Lsp1, Gpx1, Loxl2, Inpp5k, Trp63, Rpsa, Park7, Kiss1r, Hdac1, Diap3, Dlg1, Hmgb1, Kntc1, Gabarap, Coro1a, Mgea5, Kdm5a, Setd1a, Fam40a, Ube2i, Tspyl2, Ldb1, Malat1, Ctsd, Dc…
GO:0071842	cellular component organi	0.17575 ( 129 of 734 genes )	0.08100 ( 2755 of 34011 annotated genes )	3.834e-17	7.476e-14	Phpt1, Brd7, Smarcad1, Bub3, Fis1, Parl, Dnajb6, Ttn, Chd7, Dync1h1, Rnf20, Ccnk, Use1, Flna, Trp53, Get4, Rps15, Tln1, Rbmxrt, Nin, Nap1l4, Lsp1, Rpsa, Park7, Kiss1r, Hdac1, Gabarap, Itga6, Sema3a, Eif3d, Lama2, Setd1a, Malat1, Arhgap4, Mbtd1, Nek9, Rad21, Morf4l1, Brwd1, Actr3, Actg1, Add1, Sgcg, Caprin1, Utrn, Rac2, Nid1, Tuba1c, Dock2, Mark2, Ogt, Tubb5, Mll2, Tmod3, Usp9x, Cfl1, Col4a3bp, Pt…
GO:0051252	regulation of RNA metabol	0.16485 ( 121 of 734 genes )	0.07533 ( 2562 of 34011 annotated genes )	2.355e-16	4.592e-13	Mta3, Ino80d, Brd7, Cdc5l, Tfam, Eno1, Tax1bp1, Sfswap, Rbmy1a1, Prkd2, Dnajb6, Ikbkb, Chd7, Rnf20, Pcgf1, Snrnp70, Mysm1, Ccnk, Gm3258, Flii, Flna, Trp53, Ddx54, Nfkb1, Klhl31, Ski, Rps3, Hnrnpf, Zfp652, Mef2d, Mbnl1, Rbmxrt, Zbtb20, Loxl2, Inpp5k, Eif4a3, Trp63, Srsf4, Hdac1, Adam8, Tbl1x, Nono, Tcfap2b, Hmgb1, Supt16h, Kcnh5, Itga6, Cnot1, Bbx, Rps6ka3, Kdm5a, Bloc1s2, Egr2, Ube2i, Tspyl2, Ska…
GO:2000112	regulation of cellular ma	0.17030 ( 125 of 734 genes )	0.07971 ( 2711 of 34011 annotated genes )	4.222e-16	8.234e-13	Mta3, Ino80d, Brd7, Cdc5l, Tfam, Gnb2l1, Eno1, Tax1bp1, Sfswap, Prkd2, Dnajb6, Ikbkb, Chd7, Rnf20, Pcgf1, Patl1, Mysm1, Ccnk, Gm3258, Flii, Flna, Trp53, Eif3k, Ddx54, Nfkb1, Klhl31, Ski, Rps3, Zfp652, Eif2c4, Mef2d, Rbmxrt, Eif4g2, Zbtb20, Loxl2, Inpp5k, Eif4a3, Trp63, Hdac1, Adam8, Tbl1x, Ppp1ca, Nono, Tcfap2b, Hmgb1, Supt16h, Kcnh5, Itga6, Mgea5, Cnot1, Bbx, Rps6ka3, Kdm5a, Bloc1s2, Egr2, Ube2i…
GO:0010556	regulation of macromolecu	0.17302 ( 127 of 734 genes )	0.08174 ( 2780 of 34011 annotated genes )	4.733e-16	9.229e-13	Mta3, Ino80d, Brd7, Cdc5l, Tfam, Gnb2l1, Eno1, Tax1bp1, Sfswap, Prkd2, Dnajb6, Ikbkb, Chd7, Rnf20, Pcgf1, Patl1, Mysm1, Ccnk, Gm3258, Flii, Flna, Trp53, Eif3k, Ddx54, Nfkb1, Klhl31, Ski, Rps3, Zfp652, Eif2c4, Mef2d, Rbmxrt, Eif4g2, Zbtb20, Loxl2, Inpp5k, Eif4a3, Trp63, Hdac1, Adam8, Tbl1x, Ppp1ca, Nono, Cd27, Tcfap2b, Hmgb1, Supt16h, Kcnh5, Itga6, Mgea5, Bbx, Cnot1, Rps6ka3, Kdm5a, Bloc1s2, Egr2,…
GO:0048518	positive regulation of bi	0.18937 ( 139 of 734 genes )	0.09382 ( 3191 of 34011 annotated genes )	6.95e-16	1.355e-12	Phpt1, Zc3hav1, Brd7, Gnb2l1, Uhrf2, Hcls1, Chd7, Rnf20, H2-T23, Flna, Trp53, Nfkb1, Sell, Rps3, Csk, Mef2d, Ldlrap1, H2-K1, Rbmxrt, Park7, Kiss1r, Hdac1, Adam8, Tbl1x, Cd27, Tcfap2b, Itga6, Gnai2, Rps6ka3, Nub1, Lama2, Bloc1s2, Skap1, Agxt2, Cd5, Cd81, Xiap, Supt4h1, Cbl, Med12, Actr3, Trim21, Nfat5, Add1, Ppp3cb, Pak2, Ddx17, Gtf2f1, Rbm3, Nrd1, Caprin1, Utrn, Rac2, Nid1, Rangrf, Mark2, Dock2, …
GO:0031326	regulation of cellular bi	0.17847 ( 131 of 734 genes )	0.08609 ( 2928 of 34011 annotated genes )	7.489e-16	1.46e-12	Mta3, Ino80d, Brd7, Cdc5l, Tfam, Gnb2l1, Eno1, Tax1bp1, Sfswap, Prkd2, Dnajb6, Ikbkb, Chd7, Rnf20, Pcgf1, Patl1, Mysm1, Ccnk, Gm3258, Flii, Flna, Trp53, Eif3k, Ddx54, Nfkb1, Klhl31, Ski, Rps3, Zfp652, Eif2c4, Mef2d, Rbmxrt, Eif4g2, Zbtb20, Loxl2, Inpp5k, Eif4a3, Trp63, Hdac1, Adam8, Tbl1x, Ppp1ca, Nono, Cd27, Tcfap2b, Npb, Hmgb1, Supt16h, Kcnh5, Itga6, Gnai2, Mgea5, Bbx, Cnot1, Rps6ka3, Kdm5a, Bl…
GO:0009889	regulation of biosyntheti	0.17847 ( 131 of 734 genes )	0.08718 ( 2965 of 34011 annotated genes )	1.97e-15	3.842e-12	Mta3, Ino80d, Brd7, Cdc5l, Tfam, Gnb2l1, Eno1, Tax1bp1, Sfswap, Prkd2, Dnajb6, Ikbkb, Chd7, Rnf20, Pcgf1, Patl1, Mysm1, Ccnk, Gm3258, Flii, Flna, Trp53, Eif3k, Ddx54, Nfkb1, Klhl31, Ski, Rps3, Zfp652, Eif2c4, Mef2d, Rbmxrt, Eif4g2, Zbtb20, Loxl2, Inpp5k, Eif4a3, Trp63, Hdac1, Adam8, Tbl1x, Ppp1ca, Nono, Cd27, Tcfap2b, Npb, Hmgb1, Supt16h, Kcnh5, Itga6, Gnai2, Mgea5, Bbx, Cnot1, Rps6ka3, Kdm5a, Bl…
GO:0048522	positive regulation of ce	0.17439 ( 128 of 734 genes )	0.08441 ( 2871 of 34011 annotated genes )	2.256e-15	4.4e-12	Cfl1, Phpt1, Zc3hav1, Mta3, Brd7, Pdcd10, AY036118, Tfam, Gnb2l1, Uhrf2, Prkd2, Hcls1, Pecam1, Rnf20, Mysm1, Gm3258, Nqo1, H2-T23, Flna, Trp53, Vav1, Nfkb1, Ski, Sell, Rps3, H2-D1, Mef2d, Ldlrap1, H2-K1, Rbmxrt, Gpx1, Loxl2, Inpp5k, Eif4a3, Trp63, Kiss1r, Hdac1, Adam8, Tbl1x, Ccnd3, Cd27, Tcfap2b, Dlg1, Robld3, Hmgb1, 1810046J19Rik, Eef1d, Coro1a, Itga6, Gnai2, Mgea5, Usp19, Rps6ka3, Nub1, Kdm5a,…
GO:0006396	RNA processing	0.06131 ( 45 of 734 genes )	0.01544 ( 525 of 34011 annotated genes )	5.472e-15	1.067e-11	Rps24, Malat1, Srsf3, Rps16, Pnpt1, Cdc5l, Srrm1, Aqr, Thoc5, Srsf1, Snrpd2, Hnrnpa1, Ddx39, Tfip11, Sfswap, Rbm16, Rpl7, Rbmy1a1, U2af1, Rpl11, Snrnp70, Ddx54, Rps19, Rbm3, D10Wsu52e, Hnrnpf, Rpf1, Rps15, Hnrnpk, Mbnl1, Rbmxrt, Rpl5, Pa2g4, Eif4a3, Srsf6, Cdc40, Rpsa, Srsf4, Srpk1, Nono, Dkc1, Trnt1, Syf2, Rnmt, Pabpc1,
GO:0006351	transcription, DNA-depend	0.15804 ( 116 of 734 genes )	0.07530 ( 2561 of 34011 annotated genes )	2.041e-14	3.98e-11	Mta3, Ino80d, Brd7, Cdc5l, Tfam, Eno1, Tax1bp1, Sfswap, Prkd2, Dnajb6, Ikbkb, Chd7, Rnf20, Pcgf1, Mysm1, Ccnk, Gm3258, Flii, Flna, Trp53, Ddx54, Nfkb1, Klhl31, Ski, Rps3, Zfp652, Mef2d, Rbmxrt, Zbtb20, Loxl2, Inpp5k, Eif4a3, Trp63, Hdac1, Adam8, Tbl1x, Nono, Tcfap2b, Hmgb1, Supt16h, Kcnh5, Itga6, Cnot1, Bbx, Rps6ka3, Kdm5a, Bloc1s2, Egr2, Ube2i, Tspyl2, Skap1, Ldb1, Ash2l, Crebbp, Hipk1, Pbrm1, C…
GO:0032774	RNA biosynthetic process	0.15804 ( 116 of 734 genes )	0.07550 ( 2568 of 34011 annotated genes )	2.461e-14	4.8e-11	Mta3, Ino80d, Brd7, Cdc5l, Tfam, Eno1, Tax1bp1, Sfswap, Prkd2, Dnajb6, Ikbkb, Chd7, Rnf20, Pcgf1, Mysm1, Ccnk, Gm3258, Flii, Flna, Trp53, Ddx54, Nfkb1, Klhl31, Ski, Rps3, Zfp652, Mef2d, Rbmxrt, Zbtb20, Loxl2, Inpp5k, Eif4a3, Trp63, Hdac1, Adam8, Tbl1x, Nono, Tcfap2b, Hmgb1, Supt16h, Kcnh5, Itga6, Cnot1, Bbx, Rps6ka3, Kdm5a, Bloc1s2, Egr2, Ube2i, Tspyl2, Skap1, Ldb1, Ash2l, Crebbp, Hipk1, Pbrm1, C…
GO:0065009	regulation of molecular f	0.12398 ( 91 of 734 genes )	0.05272 ( 1793 of 34011 annotated genes )	3.517e-14	6.858e-11	Phpt1, Zc3hav1, Pdcd10, Plaa, Krit1, Gnb2l1, Eno1, Tax1bp1, Gpihbp1, Fis1, Prkd2, Grk6, Dnajb6, Ttn, Ikbkb, Ptma, Ccnk, Phactr1, Nqo1, Dnajc10, Flna, Trp53, Vav1, Nfkb1, Ski, Rps3, Csk, Ldlrap1, Arhgdia, Gpx1, Arhgap1, Prkar1a, Inpp5k, Park7, Kiss1r, Adam8, Ccnd3, Cd27, Npb, Dlg1, Robld3, Hmgb1, Dgka, Arhgap9, Crbn, Gnai2, Rps6ka3, Ube2i, Tspyl2, Madd, Arhgap4, Crebbp, Cflar, Hipk1, Crtc2, 181007…
GO:0006355	regulation of transcripti	0.15259 ( 112 of 734 genes )	0.07318 ( 2489 of 34011 annotated genes )	9.633e-14	1.878e-10	Mta3, Ino80d, Brd7, Cdc5l, Tfam, Eno1, Tax1bp1, Sfswap, Prkd2, Dnajb6, Ikbkb, Chd7, Rnf20, Pcgf1, Mysm1, Ccnk, Gm3258, Flii, Flna, Trp53, Ddx54, Nfkb1, Klhl31, Ski, Rps3, Zfp652, Mef2d, Rbmxrt, Zbtb20, Loxl2, Inpp5k, Eif4a3, Trp63, Hdac1, Adam8, Tbl1x, Nono, Tcfap2b, Hmgb1, Supt16h, Kcnh5, Itga6, Cnot1, Bbx, Rps6ka3, Kdm5a, Bloc1s2, Egr2, Ube2i, Tspyl2, Skap1, Ldb1, Ash2l, Crebbp, Hipk1, Pbrm1, C…
GO:0051179	localization	0.20981 ( 154 of 734 genes )	0.11543 ( 3926 of 34011 annotated genes )	9.881e-14	1.927e-10	Phpt1, Cog3, Ap3m1, Appl1, Slc9a9, Ndufa9, Krit1, Gnb2l1, Bub3, 1700039E15Rik, Atp2a2, Grk6, Dnajb6, Chd7, Dync1h1, Rnf20, Slc24a3, Use1, Uqcrh, Flna, Trp53, Morc3, Sell, Get4, Csk, Sytl5, Hiat1, Rps15, Tln1, Ldlrap1, Nin, Arhgdia, Lrba, Rpsa, Park7, Kiss1r, Adam8, Slc16a8, Cd27, Tcfap2b, Slc35b3, Ndufb8, Xpo6, Kcnh5, Gabarap, Itga6, Sema3a, Stxbp3a, Itga4, Tnpo3, Anxa6, Arhgap4, Copa, Nup210, 49…
GO:0008380	RNA splicing	0.03951 ( 29 of 734 genes )	0.00714 ( 243 of 34011 annotated genes )	1.114e-13	2.172e-10	Hnrnpf, Malat1, Mbnl1, Hnrnpk, Srsf3, Rbmxrt, Cdc5l, Srrm1, Aqr, Eif4a3, Thoc5, Srsf6, Cdc40, Srsf4, Srsf1, Snrpd2, Srpk1, Nono, Ddx39, Hnrnpa1, Tfip11, Sfswap, Rbm16, Rbmy1a1, U2af1, Syf2, Snrnp70, Pabpc1, D10Wsu52e,
GO:0033036	macromolecule localizatio	0.10899 ( 80 of 734 genes )	0.04475 ( 1522 of 34011 annotated genes )	2.422e-13	4.723e-10	Col4a3bp, Cfl1, Spns1, Cog3, Ap3m1, Lcp2, Appl1, Gnb2l1, Bub3, Hnrnpa1, Ddx39, Hook1, Gpihbp1, Dnajb6, Mbtps1, Abca4, Nupl1, Use1, Mfn2, Flna, Trp53, Morc3, Atp10d, Csk, Get4, Sytl5, Tln1, Ldlrap1, Dnajc14, Nin, Arhgdia, Lrba, Inpp5k, Eif4a3, Slc28a2, Rpsa, Kiss1r, Cd27, Dlg1, Robld3, Ddx42, Xpo6, Gabarap, Gdi1, Mgea5, Stxbp3a, Egr2, Tnpo3, Spnb2, Thoc5, Copa, 4932438A13Rik, Nup210, Cd81, Stxbp2,…
GO:0016071	mRNA metabolic process	0.04768 ( 35 of 734 genes )	0.01135 ( 386 of 34011 annotated genes )	1.21e-12	2.36e-09	Malat1, Srsf3, Pnpt1, Cdc5l, Srrm1, Aqr, Thoc5, Srsf1, Snrpd2, Ddx39, Hnrnpa1, Tfip11, Sfswap, Rbm16, Rbmy1a1, U2af1, Patl1, Snrnp70, Hnrnpf, Lsm7, Eif2c4, Hnrnpk, Mbnl1, Rbmxrt, Hnrpdl, Eif4a3, Srsf6, Cdc40, Srsf4, Srpk1, Nono, Rnmt, Syf2, Pabpc1, Pnrc2,
GO:0048519	negative regulation of bi	0.16485 ( 121 of 734 genes )	0.08559 ( 2911 of 34011 annotated genes )	1.909e-12	3.722e-09	Phpt1, Brd7, Pdcd10, Krit1, Gnb2l1, Eno1, Bub3, Uhrf2, Tax1bp1, Atp2a2, Sfswap, Parl, Grk6, Dnajb6, Rnf20, Patl1, Ptma, Dnajc10, Mfn2, Flna, Trp53, Nfkb1, Morc3, Ski, Rps3, Csk, Eif2c4, Rbmxrt, Gpx1, Zbtb20, Loxl2, Inpp5k, Eif4a3, Trp63, Idh3g, Srsf4, Park7, Kiss1r, Hdac1, Adam8, Tbl1x, Cd27, Tcfap2b, Dlg1, Ddx42, Hmgb1, 1810046J19Rik, Kntc1, Psmb4, Coro1a, Itga6, Gnai2, Crbn, Sema3a, Mgea5, Stxb…
GO:0048583	regulation of response to	0.12125 ( 89 of 734 genes )	0.05548 ( 1887 of 34011 annotated genes )	3.952e-12	7.706e-09	Phpt1, Zc3hav1, Ptpn1, Pdcd10, Prkd2, Hcls1, Grk6, Ttn, Ikbkb, Pecam1, Mfn2, H2-T23, Flna, Trp53, Vav1, Nfkb1, Ski, Sell, Rps3, H2-D1, Csk, Gpx4, Ldlrap1, H2-K1, Arhgap1, Gpx1, Psd4, Inpp5k, Trp63, Park7, Hdac1, Adam8, Cd27, Tcfap2b, Robld3, Arhgef1, Hmgb1, Eef1d, Psmb4, Sema3a, Rps6ka3, Ube2i, Skap1, Madd, Arhgap4, Pcbp2, Hipk1, Chd8, Cd81, Klhl6, Lfng, Stxbp2, Xiap, Cd3e, Cbl, Med12, Ccr4, Cops…
GO:0002376	immune system process	0.09401 ( 69 of 734 genes )	0.03822 ( 1300 of 34011 annotated genes )	7.888e-12	1.538e-08	Phpt1, Zc3hav1, Lcp2, Itgad, AY036118, Gbp1, Tapbp, Prkd2, Hcls1, Ikbkb, Chd7, Pecam1, Klrg1, H2-T23, Trp53, Vav1, Rps19, Nfkb1, Sell, H2-D1, Csk, Msn, H2-K1, Gpx1, H2-Q6, Adam8, Cd27, Ccnd3, Dlg1, Hmgb1, Psmb4, Coro1a, Itga6, Psmb9, Pik3cd, Rps6ka3, Ldb1, Skap1, Pcbp2, Thoc5, Cd5, Irgm2, Klhl6, Stxbp2, Cd3e, Ccr4, Pdpk1, Add1, Ppp3cb, Rps14, Ly86, Sp100, Ap3b1, Fyn, Foxo3, Aqp4, Trim56, Txk, Doc…
GO:0050896	response to stimulus	0.30790 ( 226 of 734 genes )	0.20335 ( 6916 of 34011 annotated genes )	8.857e-12	1.727e-08	Dtx4, Phpt1, Zc3hav1, Itgad, Brd7, Hmha1, Gnb2l1, Atp2a2, Fis1, Rassf2, Hcls1, Grk6, Ttn, Npepps, Chd7, Dnajc10, H2-T23, Flna, Trp53, Nfkb1, Sell, Rps3, Csk, Hspb3, Ldlrap1, H2-K1, Olfr1246, Mras, Arhgdia, Lsp1, Arhgap1, Psd4, Lrba, Park7, Kiss1r, Hdac1, Adam8, Tbl1x, Cd27, Tcfap2b, Olfr1018, As3mt, Vmn2r60, Olfr49, Supt16h, Psmb4, Kcnh5, Tas2r113, Lgr5, Itga6, Gnai2, Sema3a, Stxbp3a, Rps6ka3, La…
GO:0006796	phosphate metabolic proce	0.11172 ( 82 of 734 genes )	0.04987 ( 1696 of 34011 annotated genes )	8.861e-12	1.728e-08	Col4a3bp, Cfl1, Phpt1, Ptpn1, Pdcd10, Gnb2l1, Prkd2, Hcls1, Grk6, Ttn, Ikbkb, Pecam1, Ccnk, Phactr1, Uqcrh, Dnajc10, Trp53, Morc3, Csk, Dusp11, Eef2k, Prkar1a, Inpp5k, Mtmr12, Kiss1r, Adam8, Stk31, Ppp1ca, Ccnd3, Dlg1, Robld3, Ndufb8, Hmgb1, Inpp4b, St3gal1, Kcnh5, Dgka, Itga6, Gnai2, Pak6, Pik3cd, Rps6ka3, Tspyl2, Madd, Snrk, Spnb2, Hipk1, Nek9, Cd81, Cd3e, Pdpk1, Ppp3cb, Pak2, Sema4d, Ntrk2, Ri…
GO:0006793	phosphorus metabolic proc	0.11172 ( 82 of 734 genes )	0.04993 ( 1698 of 34011 annotated genes )	9.4e-12	1.833e-08	Col4a3bp, Cfl1, Phpt1, Ptpn1, Pdcd10, Gnb2l1, Prkd2, Hcls1, Grk6, Ttn, Ikbkb, Pecam1, Ccnk, Phactr1, Uqcrh, Dnajc10, Trp53, Morc3, Csk, Dusp11, Eef2k, Prkar1a, Inpp5k, Mtmr12, Kiss1r, Adam8, Stk31, Ppp1ca, Ccnd3, Dlg1, Robld3, Ndufb8, Hmgb1, Inpp4b, St3gal1, Kcnh5, Dgka, Itga6, Gnai2, Pak6, Pik3cd, Rps6ka3, Tspyl2, Madd, Snrk, Spnb2, Hipk1, Nek9, Cd81, Cd3e, Pdpk1, Ppp3cb, Pak2, Sema4d, Ntrk2, Ri…
GO:0006397	mRNA processing	0.04087 ( 30 of 734 genes )	0.00914 ( 311 of 34011 annotated genes )	1.06e-11	2.067e-08	Hnrnpf, Malat1, Mbnl1, Hnrnpk, Srsf3, Rbmxrt, Pnpt1, Cdc5l, Srrm1, Aqr, Eif4a3, Thoc5, Srsf6, Cdc40, Srsf4, Srsf1, Snrpd2, Srpk1, Nono, Ddx39, Hnrnpa1, Tfip11, Sfswap, Rbm16, Rbmy1a1, U2af1, Syf2, Rnmt, Snrnp70, Pabpc1,
GO:0051246	regulation of protein met	0.08856 ( 65 of 734 genes )	0.03508 ( 1193 of 34011 annotated genes )	1.091e-11	2.127e-08	Brd7, Pdcd10, Gnb2l1, Hcls1, Ttn, Pecam1, Patl1, Ccnk, Dnajc10, Flna, Trp53, Eif3k, Csk, Eif2c4, Eif4g2, Eef2k, Gpx1, Prkar1a, Eif4a3, Inpp5k, Adam8, Kiss1r, Ppp1ca, Ccnd3, Dlg1, Robld3, Hmgb1, Dgka, Gnai2, Mgea5, Nub1, Ldb1, Madd, Tspyl2, Mdm4, 1810074P20Rik, Ireb2, Cd81, Cd3e, Pdpk1, Trim21, Rps14, Pak2, Sema4d, Nrd1, Rbm3, Rictor, Eif3b, Caprin1, Fyn, Ibtk, Foxo3, Pa2g4, Rtf1, Rps4x, Rps5, Taf…
GO:0044248	cellular catabolic proces	0.09673 ( 71 of 734 genes )	0.04055 ( 1379 of 34011 annotated genes )	1.539e-11	3e-08	Zc3hav1, Hsd11b1, Gnb2l1, Uhrf2, Atp2a2, Fis1, Dnajb6, Rnf20, Patl1, Abca4, Dnajc10, Mfn2, Vav1, Atp10d, Gpx4, Eif2c4, Mras, Arhgap1, Gpx1, Eif4a3, Idh3g, Park7, Adam8, Ogdh, Tbl1x, Ppp1ca, Hmgb1, Psmb4, Pabpc1, Arhgap9, Crbn, Gnai2, Psmb9, Usp19, Nub1, Ube2i, Agxt2, Ctsd, Nras, Pnpt1, Arhgap4, Pcbp2, Irgm2, Atp5a1, Psma5, Rasa3, Rab14, Eef2, Ntrk2, Sema4d, Nrd1, Rictor, Sdha, Lsm7, Smap2, Rac2, …
GO:0071843	cellular component biogen	0.03406 ( 25 of 734 genes )	0.00647 ( 220 of 34011 annotated genes )	1.642e-11	3.203e-08	Rps24, Rps2, Rpf1, Rps15, Mbnl1, Rpl5, Rbmxrt, Spnb2, Rps25, Rps16, Pa2g4, Eif4a3, Rpsa, Srsf1, Rplp0, Bysl, Dkc1, Sdad1, Rpl7, Rpl11, Dync1h1, Patl1, Rps14, Eif3d, Rps19,
GO:0006468	protein phosphorylation	0.08719 ( 64 of 734 genes )	0.03487 ( 1186 of 34011 annotated genes )	2.378e-11	4.638e-08	Cfl1, Pdcd10, Gnb2l1, Prkd2, Hcls1, Grk6, Ttn, Ikbkb, Pecam1, Ccnk, Dnajc10, Trp53, Morc3, Csk, Eef2k, Prkar1a, Inpp5k, Adam8, Kiss1r, Stk31, Ccnd3, Dlg1, Robld3, Hmgb1, St3gal1, Kcnh5, Dgka, Gnai2, Pak6, Rps6ka3, Madd, Tspyl2, Snrk, Spnb2, Hipk1, Nek9, Cd81, Cd3e, Pdpk1, Ppp3cb, Pak2, Ntrk2, Sema4d, Rictor, Camk2a, Adck2, Fyn, Ibtk, Oxsr1, Txk, Srpk1, Mark2, Stk10, Taf1, Lck, Cd4, Stk38, Zap70, …
GO:0016310	phosphorylation	0.09946 ( 73 of 734 genes )	0.04272 ( 1453 of 34011 annotated genes )	2.406e-11	4.692e-08	Col4a3bp, Cfl1, Pdcd10, Gnb2l1, Prkd2, Hcls1, Grk6, Ttn, Ikbkb, Pecam1, Ccnk, Phactr1, Uqcrh, Dnajc10, Trp53, Morc3, Csk, Eef2k, Prkar1a, Inpp5k, Kiss1r, Adam8, Stk31, Ccnd3, Dlg1, Robld3, Ndufb8, Hmgb1, St3gal1, Kcnh5, Dgka, Gnai2, Itga6, Pak6, Pik3cd, Rps6ka3, Tspyl2, Madd, Snrk, Spnb2, Hipk1, Nek9, Cd81, Cd3e, Pdpk1, Ppp3cb, Pak2, Ntrk2, Sema4d, Rictor, Ak5, Camk2a, Adck2, Fyn, Ibtk, Oxsr1, Tx…
GO:0022613	ribonucleoprotein complex	0.03270 ( 24 of 734 genes )	0.00609 ( 207 of 34011 annotated genes )	2.727e-11	5.318e-08	Rps24, Rps2, Rpf1, Rps15, Mbnl1, Rpl5, Rbmxrt, Rps25, Rps16, Pa2g4, Eif4a3, Rpsa, Srsf1, Rplp0, Bysl, Dkc1, Sdad1, Rpl7, Rpl11, Dync1h1, Patl1, Rps14, Eif3d, Rps19,
GO:0009056	catabolic process	0.10763 ( 79 of 734 genes )	0.04828 ( 1642 of 34011 annotated genes )	2.801e-11	5.463e-08	Zc3hav1, Hsd11b1, Gnb2l1, Uhrf2, Atp2a2, Fis1, Dnajb6, Rnf20, Patl1, Abca4, Dnajc10, Mfn2, Psmc1, Flna, Vav1, Atp10d, Gpx4, Eif2c4, Mras, Arhgap1, Gpx1, Inpp5k, Eif4a3, Idh3g, Park7, Adam8, Ogdh, Tbl1x, Ppp1ca, Hmgb1, Inpp4b, Psmb4, Pabpc1, Arhgap9, Crbn, Gnai2, Psmb9, Usp19, Nub1, Ube2i, Agxt2, Ctsd, Nras, Pnpt1, Arhgap4, Pcbp2, Mdm4, Irgm2, Atp5a1, Psma5, Rasa3, Rab14, Sema4d, Eef2, Ntrk2, Nrd1…
GO:0048523	negative regulation of ce	0.14714 ( 108 of 734 genes )	0.07706 ( 2621 of 34011 annotated genes )	6.126e-11	1.195e-07	Phpt1, Brd7, Pdcd10, Krit1, Gnb2l1, Eno1, Bub3, Uhrf2, Tax1bp1, Sfswap, Parl, Grk6, Dnajb6, Rnf20, Patl1, Ptma, Dnajc10, Mfn2, Trp53, Nfkb1, Morc3, Ski, Rps3, Csk, Eif2c4, Rbmxrt, Gpx1, Zbtb20, Loxl2, Inpp5k, Eif4a3, Trp63, Srsf4, Park7, Kiss1r, Hdac1, Adam8, Tbl1x, Cd27, Tcfap2b, Dlg1, Ddx42, Hmgb1, 1810046J19Rik, Kntc1, Coro1a, Itga6, Gnai2, Crbn, Sema3a, Mgea5, Stxbp3a, Ube2i, Tspyl2, Ldb1, Sp…
GO:0032268	regulation of cellular pr	0.08038 ( 59 of 734 genes )	0.03178 ( 1081 of 34011 annotated genes )	9.623e-11	1.877e-07	Tspyl2, Madd, Brd7, Pdcd10, Gnb2l1, 1810074P20Rik, Ireb2, Cd81, Hcls1, Ttn, Cd3e, Pecam1, Pdpk1, Patl1, Trim21, Ccnk, Dnajc10, Rps14, Pak2, Trp53, Eif3k, Sema4d, Rictor, Rbm3, Nrd1, Csk, Eif3b, Caprin1, Eif2c4, Eif4g2, Foxo3, Ibtk, Eef2k, Gpx1, Prkar1a, Pa2g4, Eif4a3, Inpp5k, Rtf1, Adam8, Kiss1r, Ppp1ca, Ccnd3, Dlg1, Rps5, Rps4x, Robld3, Taf1, Hmgb1, Cd4, Lck, Stk38, Dgka, Ogt, Gnai2, Mgea5, Il6,…
GO:0044085	cellular component biogen	0.09673 ( 71 of 734 genes )	0.04243 ( 1443 of 34011 annotated genes )	1.159e-10	2.26e-07	Rps24, Rps25, Tfam, Gnb2l1, Srsf1, Rplp0, Rpl7, Ttn, Dync1h1, Patl1, Cct2, Uqcrh, Flna, Trp53, Rps19, Ski, Rps2, Rps15, Tln1, Mbnl1, Rpl5, Rbmxrt, Nap1l4, Eif4a3, Inpp5k, Trp63, Rpsa, Kiss1r, Dlg1, Bysl, 1810046J19Rik, Hmgb1, Coro1a, Crbn, Itga6, Stxbp3a, Eif3d, Tspyl2, Ldb1, Ctsd, Spnb2, Pnpt1, Rps16, Pomp, Thsd4, Crtc2, Mdm4, Rpl11, Actr3, Actn1, Pdpk1, Actg1, Trim21, Add1, Rps14, Rictor, Rpf1,…
GO:0008104	protein localization	0.09128 ( 67 of 734 genes )	0.03893 ( 1324 of 34011 annotated genes )	1.246e-10	2.43e-07	Cfl1, Cog3, Ap3m1, Lcp2, Appl1, Gnb2l1, Bub3, Hook1, Gpihbp1, Dnajb6, Mbtps1, Nupl1, Use1, Mfn2, Flna, Trp53, Morc3, Csk, Get4, Sytl5, Tln1, Ldlrap1, Dnajc14, Nin, Arhgdia, Lrba, Inpp5k, Slc28a2, Cd27, Dlg1, Robld3, Ddx42, Xpo6, Gabarap, Gdi1, Mgea5, Stxbp3a, Egr2, Spnb2, Tnpo3, Copa, Nup210, Cd81, Rad21, Stxbp2, Nup88, Rpl11, Pdpk1, Rab14, Ranbp2, Ap3b1, Vps35, Arf3, Golga4, Rabif, Ipo5, Rangrf,…
GO:0051716	cellular response to stim	0.25613 ( 188 of 734 genes )	0.16486 ( 5607 of 34011 annotated genes )	1.396e-10	2.722e-07	Dtx4, Phpt1, Zc3hav1, Itgad, Brd7, Hmha1, Gnb2l1, Atp2a2, Fis1, Rassf2, Hcls1, Grk6, Ttn, Npepps, Dnajc10, Flna, Trp53, Nfkb1, Sell, Rps3, Csk, Ldlrap1, Olfr1246, Mras, Arhgdia, Lsp1, Arhgap1, Psd4, Lrba, Park7, Kiss1r, Hdac1, Adam8, Tbl1x, Cd27, Tcfap2b, Olfr1018, As3mt, Vmn2r60, Olfr49, Supt16h, Kcnh5, Tas2r113, Lgr5, Itga6, Gnai2, Rps6ka3, Skap1, Madd, Itga4, Srsf3, Poli, Arhgap4, Arhgap25, Cd…
GO:0006325	chromatin organization	0.04768 ( 35 of 734 genes )	0.01350 ( 459 of 34011 annotated genes )	1.534e-10	2.991e-07	Setd1a, Tspyl2, Ldb1, Brd7, Ash2l, Crebbp, Ep400, Smarcad1, Pbrm1, Mbtd1, Chd8, Setd2, Chd7, Msl2, Whsc1l1, Morf4l1, Wdr82, Rnf20, Pcgf1, Mysm1, Trp53, Gpx4, Brcc3, Nap1l4, Loxl2, Rtf1, Trp63, Hdac1, Taf1, Set, Ogt, Mgea5, Mll2, Kdm5a, Phb,
GO:0050790	regulation of catalytic a	0.09537 ( 70 of 734 genes )	0.04231 ( 1439 of 34011 annotated genes )	2.584e-10	5.038e-07	Phpt1, Zc3hav1, Pdcd10, Plaa, Krit1, Gnb2l1, Gpihbp1, Fis1, Dnajb6, Ttn, Ptma, Ccnk, Phactr1, Nqo1, Dnajc10, Flna, Trp53, Vav1, Nfkb1, Ski, Rps3, Csk, Arhgdia, Arhgap1, Gpx1, Prkar1a, Inpp5k, Adam8, Kiss1r, Ccnd3, Cd27, Npb, Dlg1, Robld3, Hmgb1, Dgka, Arhgap9, Gnai2, Rps6ka3, Madd, Tspyl2, Arhgap4, Cflar, Cd81, Xiap, Pdpk1, Rasa3, Gtf2f1, Pak2, Spinlw1, Ntrk2, Sema4d, Nrd1, Rictor, Smap2, Ibtk, B…
GO:0016568	chromatin modification	0.04360 ( 32 of 734 genes )	0.01182 ( 402 of 34011 annotated genes )	3.22e-10	6.28e-07	Setd1a, Tspyl2, Ldb1, Brd7, Ash2l, Crebbp, Ep400, Smarcad1, Pbrm1, Mbtd1, Chd8, Setd2, Chd7, Msl2, Whsc1l1, Morf4l1, Wdr82, Rnf20, Pcgf1, Mysm1, Trp53, Brcc3, Loxl2, Rtf1, Trp63, Hdac1, Taf1, Ogt, Mgea5, Mll2, Kdm5a, Phb,
GO:0044093	positive regulation of mo	0.07084 ( 52 of 734 genes )	0.02731 ( 929 of 34011 annotated genes )	5.468e-10	1.066e-06	Ube2i, Zc3hav1, Madd, Pdcd10, Plaa, Arhgap4, Crebbp, Krit1, Hipk1, Gnb2l1, Eno1, Crtc2, Gpihbp1, Fis1, Lfng, Cd81, Prkd2, Dnajb6, Ikbkb, Pdpk1, Rasa3, Add1, Dnajc10, Pak2, Gtf2f1, Sema4d, Sp100, Ski, Rps3, Csk, Camk2a, Arhgap1, Txk, Park7, Adam8, Kiss1r, Rapgef2, Ccnd3, Dlg1, Robld3, Gmip, Hmgb1, Cd4, Lck, Myl4, Dgka, Arhgap9, Ogt, Crbn, Gnai2, Il6, Mapk8ip3,
GO:0009966	regulation of signal tran	0.09537 ( 70 of 734 genes )	0.04313 ( 1467 of 34011 annotated genes )	5.861e-10	1.143e-06	Phpt1, Zc3hav1, Ptpn1, Pdcd10, Prkd2, Hcls1, Grk6, Ttn, Ikbkb, Pecam1, Mfn2, Flna, Trp53, Vav1, Nfkb1, Ski, Csk, Ldlrap1, Arhgap1, Gpx1, Psd4, Inpp5k, Trp63, Park7, Adam8, Hdac1, Cd27, Tcfap2b, Robld3, Arhgef1, Eef1d, Ube2i, Madd, Arhgap4, Hipk1, Chd8, Cd81, Lfng, Xiap, Cd3e, Cbl, Med12, Cops5, Pdpk1, Nfat5, Elp2, Rasa3, Ddx17, Ntrk2, Sema4d, Rictor, Smap2, Txk, Dock2, Rapgef2, Eef1e1, Aes, Gmip,…
GO:0023051	regulation of signaling	0.10627 ( 78 of 734 genes )	0.05069 ( 1724 of 34011 annotated genes )	6.538e-10	1.275e-06	Phpt1, Zc3hav1, Ptpn1, Pdcd10, Prkd2, Hcls1, Grk6, Ttn, Ikbkb, Chd7, Pecam1, Mfn2, Flna, Trp53, Vav1, Nfkb1, Ski, Csk, Ldlrap1, Arhgap1, Gpx1, Psd4, Inpp5k, Trp63, Park7, Kiss1r, Adam8, Hdac1, Cd27, Tcfap2b, Robld3, Arhgef1, Eef1d, Gnai2, Mgea5, Lama2, Ube2i, Madd, Arhgap4, Hipk1, Chd8, Cd81, Lfng, Xiap, Cd3e, Cbl, Med12, Cops5, Pdpk1, Nfat5, Elp2, Rasa3, Ppp3cb, Ddx17, Sema4d, Ntrk2, Rictor, Cam…
GO:0016570	histone modification	0.03406 ( 25 of 734 genes )	0.00794 ( 270 of 34011 annotated genes )	1.311e-09	2.556e-06	Setd1a, Ldb1, Brd7, Brcc3, Ash2l, Crebbp, Ep400, Loxl2, Rtf1, Smarcad1, Hdac1, Setd2, Taf1, Msl2, Whsc1l1, Morf4l1, Wdr82, Pcgf1, Rnf20, Mysm1, Ogt, Mgea5, Mll2, Trp53, Phb,
GO:0051276	chromosome organization	0.05313 ( 39 of 734 genes )	0.01764 ( 600 of 34011 annotated genes )	1.43e-09	2.789e-06	Setd1a, Tspyl2, Ldb1, Brd7, Ash2l, Crebbp, Ep400, Smarcad1, Pbrm1, Mbtd1, Bub3, Chd8, Setd2, Msl2, Chd7, Whsc1l1, Morf4l1, Wdr82, Rnf20, Pcgf1, Mysm1, Smchd1, Trp53, Acin1, Gpx4, Brcc3, Nap1l4, Loxl2, Rtf1, Trp63, Hdac1, Taf1, Set, Parp1, Ogt, Mgea5, Mll2, Kdm5a, Phb,
GO:0065008	regulation of biological	0.12670 ( 93 of 734 genes )	0.06668 ( 2268 of 34011 annotated genes )	2.02e-09	3.939e-06	Col4a3bp, Cfl1, Rps24, Cog3, Sh3bgrl3, Hsd11b1, Slc9a9, Rdh9, Krit1, Gnb2l1, Eno1, Bub3, Atp2a2, Gpihbp1, Fis1, Hcls1, Ikbkb, Chd7, Slc24a3, Dnajc10, Flna, Trp53, Rps19, Morc3, Ski, Csk, Tln1, Ldlrap1, Nin, Gpx1, Inpp5k, Slc28a2, Park7, Kiss1r, Hdac1, Adam8, Tcfap2b, Dlg1, Robld3, 1810046J19Rik, Sepw1, Wisp1, Coro1a, Sema3a, Mgea5, Stxbp3a, Usp19, Pik3cd, Egr2, Tspyl2, Ldb1, Malat1, Spnb2, Arhgap…
GO:0016569	covalent chromatin modifi	0.03406 ( 25 of 734 genes )	0.00812 ( 276 of 34011 annotated genes )	2.063e-09	4.024e-06	Setd1a, Ldb1, Brd7, Brcc3, Ash2l, Crebbp, Ep400, Loxl2, Rtf1, Smarcad1, Hdac1, Setd2, Taf1, Msl2, Whsc1l1, Morf4l1, Wdr82, Pcgf1, Rnf20, Mysm1, Ogt, Mgea5, Mll2, Trp53, Phb,
GO:0000377	RNA splicing, via transes	0.01907 ( 14 of 734 genes )	0.00250 ( 85 of 34011 annotated genes )	3.887e-09	7.58e-06	Sfswap, Rbmy1a1, Malat1, Mbnl1, Rbmxrt, Snrnp70, Srrm1, Aqr, Eif4a3, Srsf6, Srsf4, Srsf1, Ddx39, Hnrnpa1,
GO:0000398	nuclear mRNA splicing, vi	0.01907 ( 14 of 734 genes )	0.00250 ( 85 of 34011 annotated genes )	3.887e-09	7.58e-06	Sfswap, Rbmy1a1, Malat1, Mbnl1, Rbmxrt, Snrnp70, Srrm1, Aqr, Eif4a3, Srsf6, Srsf4, Srsf1, Ddx39, Hnrnpa1,
GO:0000375	RNA splicing, via transes	0.01907 ( 14 of 734 genes )	0.00253 ( 86 of 34011 annotated genes )	4.552e-09	8.876e-06	Sfswap, Rbmy1a1, Malat1, Mbnl1, Rbmxrt, Snrnp70, Srrm1, Aqr, Eif4a3, Srsf6, Srsf4, Srsf1, Ddx39, Hnrnpa1,
GO:0010604	positive regulation of ma	0.09401 ( 69 of 734 genes )	0.04501 ( 1531 of 34011 annotated genes )	7.994e-09	1.559e-05	Brd7, Tfam, Gnb2l1, Prkd2, Hcls1, Pecam1, Rnf20, Mysm1, Gm3258, Trp53, Nfkb1, Ski, Mef2d, Rbmxrt, Eif4a3, Inpp5k, Trp63, Adam8, Hdac1, Tbl1x, Cd27, Ccnd3, Tcfap2b, Hmgb1, Itga6, Mgea5, Rps6ka3, Nub1, Kdm5a, Bloc1s2, Egr2, Ldb1, Skap1, Pnpt1, Ash2l, Crebbp, Pbrm1, Chd8, Cd81, Cd3e, Supt4h1, Med12, Cops5, Nfat5, Ddx17, Gtf2f1, Pak2, Ntrk2, Sema4d, Nrd1, Rbm3, Rictor, Sp100, Hnrnpk, Foxo3, Brcc3, Rt…
GO:0009057	macromolecule catabolic p	0.05041 ( 37 of 734 genes )	0.01723 ( 586 of 34011 annotated genes )	8.169e-09	1.593e-05	Ube2i, Pnpt1, Pcbp2, Gnb2l1, Mdm4, Uhrf2, Psma5, Rnf20, Patl1, Dnajc10, Psmc1, Flna, Nrd1, Lsm7, Eif2c4, Fyn, Gpx1, Eif4a3, Afg3l2, Adam8, Tbl1x, Ppp1ca, Arih2, Hmgb1, Taf1, Psmb4, Snx1, Smurf2, Pabpc1, Crbn, Psmb7, Pnrc2, Psmb9, Usp19, Cyld, Nub1, Usp9x,
GO:0051641	cellular localization	0.09401 ( 69 of 734 genes )	0.04510 ( 1534 of 34011 annotated genes )	8.64e-09	1.685e-05	Col4a3bp, Cfl1, Cog3, Ap3m1, Lcp2, Appl1, D6Wsu116e, Gnb2l1, Bub3, Hnrnpa1, Ddx39, Hook1, Gpihbp1, Dnajb6, Mbtps1, Chd7, Nupl1, Use1, Mfn2, Flna, Trp53, Morc3, Csk, Get4, Sytl5, Rps15, Tln1, Ldlrap1, Nin, Lrba, Inpp5k, Slc28a2, Rpsa, Kiss1r, Cd27, Tcfap2b, Dlg1, Robld3, Xpo6, Mgea5, Stxbp3a, Egr2, Tnpo3, Spnb2, Thoc5, Copa, 4932438A13Rik, Rad21, Stxbp2, Rpl11, Actr3, Pdpk1, Ppp3cb, Rab14, Ntrk2, …
GO:0042254	ribosome biogenesis	0.02452 ( 18 of 734 genes )	0.00459 ( 156 of 34011 annotated genes )	8.83e-09	1.722e-05	Rps24, Rps2, Rpf1, Rps15, Rpl5, Rps25, Rps16, Pa2g4, Eif4a3, Rpsa, Rplp0, Bysl, Dkc1, Sdad1, Rpl7, Rpl11, Rps14, Rps19,
GO:0002682	regulation of immune syst	0.05450 ( 40 of 734 genes )	0.01982 ( 674 of 34011 annotated genes )	1.143e-08	2.229e-05	Phpt1, Zc3hav1, Skap1, Ldb1, Pcbp2, Thoc5, Cd5, Klhl6, Stxbp2, Prkd2, Cd3e, Pecam1, Pdpk1, Ppp3cb, H2-T23, Trp53, H2-D1, Sell, Csk, Ap3b1, Fyn, H2-K1, Msn, Foxo3, Gpx1, Txk, Adam8, Cd27, Dlg1, Stk10, Hmgb1, Cd4, Lck, Psmb4, Zap70, Coro1a, Ogt, Mapkapk3, Il6, Rps6ka3,
GO:0007165	signal transduction	0.21390 ( 157 of 734 genes )	0.13851 ( 4711 of 34011 annotated genes )	1.209e-08	2.357e-05	Dtx4, Phpt1, Zc3hav1, Itgad, Brd7, Hmha1, Gnb2l1, Atp2a2, Fis1, Rassf2, Hcls1, Grk6, Ttn, Flna, Trp53, Nfkb1, Csk, Ldlrap1, Olfr1246, Mras, Arhgdia, Lsp1, Arhgap1, Psd4, Lrba, Park7, Kiss1r, Hdac1, Adam8, Tbl1x, Cd27, Tcfap2b, Olfr1018, Vmn2r60, Olfr49, Kcnh5, Tas2r113, Lgr5, Itga6, Gnai2, Rps6ka3, Skap1, Madd, Itga4, Srsf3, Arhgap4, Arhgap25, Cd81, Xiap, Cbl, Med12, Nfat5, Rasa3, Elp2, Olfr773, …
GO:0035556	intracellular signal tran	0.09809 ( 72 of 734 genes )	0.04837 ( 1645 of 34011 annotated genes )	1.224e-08	2.388e-05	Zc3hav1, Tulp4, Hmha1, Gnb2l1, Fis1, Prkd2, Hcls1, Ttn, Ikbkb, Pecam1, Mfn2, Flna, Trp53, Vav1, Csk, Mras, Arhgdia, Arhgap1, Gpx1, Psd4, Inpp5k, Trp63, Adam8, Kiss1r, Cd27, Npb, Robld3, Arhgef1, Eef1d, Dgka, Gnai2, Pik3cd, Rps6ka3, Madd, Nras, Arhgap4, Hipk1, Cd81, Cd3e, Cbl, Cops5, Pdpk1, Nfat5, Elp2, Rasa3, Rab14, Ntrk2, Sema4d, Rictor, Sp100, Smap2, Foxo3, Arf3, Rac2, Oxsr1, Rabif, Srpk1, Dock…
GO:0023052	signaling	0.22480 ( 165 of 734 genes )	0.14883 ( 5062 of 34011 annotated genes )	2.121e-08	4.136e-05	Dtx4, Phpt1, Zc3hav1, Itgad, Brd7, Hmha1, Gnb2l1, Atp2a2, Fis1, Rassf2, Hcls1, Grk6, Ttn, Chd7, Flna, Trp53, Nfkb1, Csk, Ldlrap1, Olfr1246, Mras, Arhgdia, Lsp1, Arhgap1, Psd4, Lrba, Park7, Kiss1r, Hdac1, Adam8, Tbl1x, Cd27, Tcfap2b, Olfr1018, Vmn2r60, Olfr49, Kcnh5, Tas2r113, Lgr5, Itga6, Gnai2, Stxbp3a, Rps6ka3, Lama2, Skap1, Malat1, Madd, Itga4, Srsf3, Arhgap4, Arhgap25, Cd81, Xiap, Cbl, Med12,…
GO:0043933	macromolecular complex su	0.06676 ( 49 of 734 genes )	0.02828 ( 962 of 34011 annotated genes )	3.486e-08	6.797e-05	Cfl1, Tspyl2, Spnb2, Rps25, Pnpt1, Pomp, Tfam, Gnb2l1, Mdm4, Crtc2, Srsf1, Gpihbp1, Ttn, Actr3, Dync1h1, Patl1, Trim21, Cct2, Uqcrh, Add1, Rps14, Flna, Trp53, Rictor, Ski, Rps2, Rps15, Mbnl1, Rbmxrt, Nap1l4, Aqp4, Trp63, Rpsa, Anxa5, Tuba1c, Dlg1, Hmgb1, Set, Coro1a, Acadm, Crbn, Gria2, Ogt, Mgea5, Tubb5, Stxbp3a, Tmod3, Eif3d, Spna2,
GO:0042274	ribosomal small subunit b	0.01090 ( 8 of 734 genes )	0.00074 ( 25 of 34011 annotated genes )	3.542e-08	6.906e-05	Rps24, Rps2, Rps15, Rps16, Rps25, Rps14, Rpsa, Rps19,
GO:0006810	transport	0.15531 ( 114 of 734 genes )	0.09306 ( 3165 of 34011 annotated genes )	3.781e-08	7.372e-05	Col4a3bp, Cfl1, Spns1, Cog3, Ptpn1, Ap3m1, Lcp2, Appl1, D6Wsu116e, Slc9a9, Ndufa9, Gnb2l1, Slc25a3, 1700039E15Rik, Atp2a2, Atp13a3, Hnrnpa1, Ddx39, Hook1, Gpihbp1, Grk6, Mbtps1, Ikbkb, Chd7, Pecam1, Dync1h1, Abca4, Nupl1, Slc24a3, Use1, Uqcrh, Uqcrc2, Mfn2, Flna, Trp53, Vav1, Rps19, Atp10d, Get4, Csk, Sytl5, Hiat1, Rps15, Ldlrap1, Dnajc14, Lrba, Inpp5k, Eif4a3, Slc28a2, Rpsa, Park7, Kiss1r, Slc16…
GO:0031325	positive regulation of ce	0.09264 ( 68 of 734 genes )	0.04593 ( 1562 of 34011 annotated genes )	3.931e-08	7.665e-05	Brd7, Tfam, Gnb2l1, Prkd2, Hcls1, Pecam1, Rnf20, Mysm1, Gm3258, Trp53, Nfkb1, Ski, Mef2d, Rbmxrt, Eif4a3, Inpp5k, Trp63, Adam8, Hdac1, Tbl1x, Cd27, Ccnd3, Tcfap2b, Hmgb1, Itga6, Mgea5, Rps6ka3, Nub1, Kdm5a, Bloc1s2, Egr2, Agxt2, Ldb1, Skap1, Pnpt1, Ash2l, Crebbp, Pbrm1, Chd8, Cd81, Cd3e, Supt4h1, Med12, Cops5, Nfat5, Ddx17, Gtf2f1, Pak2, Sema4d, Nrd1, Rbm3, Rictor, Sp100, Hnrnpk, Foxo3, Brcc3, Rt…
GO:0065003	macromolecular complex as	0.06267 ( 46 of 734 genes )	0.02582 ( 878 of 34011 annotated genes )	4.056e-08	7.909e-05	Tspyl2, Spnb2, Rps25, Pnpt1, Pomp, Tfam, Gnb2l1, Mdm4, Crtc2, Srsf1, Ttn, Actr3, Dync1h1, Patl1, Trim21, Cct2, Uqcrh, Add1, Rps14, Flna, Trp53, Rictor, Ski, Rps2, Rps15, Mbnl1, Rbmxrt, Nap1l4, Aqp4, Trp63, Rpsa, Anxa5, Tuba1c, Dlg1, Hmgb1, Coro1a, Acadm, Set, Gria2, Crbn, Ogt, Tubb5, Stxbp3a, Tmod3, Eif3d, Spna2,
GO:0034622	cellular macromolecular c	0.04087 ( 30 of 734 genes )	0.01300 ( 442 of 34011 annotated genes )	4.395e-08	8.57e-05	Tspyl2, Rps2, Rps15, Mbnl1, Rbmxrt, Spnb2, Nap1l4, Rps25, Pomp, Tfam, Rpsa, Srsf1, Tuba1c, Dlg1, Ttn, Hmgb1, Actr3, Dync1h1, Set, Coro1a, Patl1, Cct2, Add1, Tubb5, Rps14, Flna, Tmod3, Eif3d, Spna2, Rictor,
GO:0070647	protein modification by s	0.04087 ( 30 of 734 genes )	0.01332 ( 453 of 34011 annotated genes )	7.54e-08	0.000147	Sae1, Ube2i, Cdc27, Brcc3, Uba3, Rnf220, Trim56, Rnf167, Kcmf1, Uhrf2, 1810074P20Rik, Arih2, Xiap, Cbl, Otub1, Wdr48, Smurf2, Rnf20, Cops5, Pcgf1, Trim21, Mysm1, Crbn, Usp19, Ube2k, Cyld, Nub1, Ranbp2, Usp9x, Rnf152,
GO:0048584	positive regulation of re	0.06403 ( 47 of 734 genes )	0.02729 ( 928 of 34011 annotated genes )	7.888e-08	0.0001538	Ube2i, Phpt1, Zc3hav1, Skap1, Lfng, Klhl6, Prkd2, Hcls1, Xiap, Cbl, Cd3e, Pecam1, Ccr4, Pdpk1, H2-T23, Ddx17, Flna, Sema4d, Ntrk2, Rictor, Nfkb1, Sell, H2-D1, Csk, Fyn, H2-K1, Ldlrap1, Brcc3, Gpx1, Trp63, Txk, Adam8, Cd27, Dock2, Robld3, Eef1e1, Dusp22, Eef1d, Hmgb1, Cd4, Lck, Zap70, Mapkapk3, Il6, Klk14, Mll2, Rps6ka3,
GO:0051234	establishment of localiza	0.15531 ( 114 of 734 genes )	0.09470 ( 3221 of 34011 annotated genes )	9.494e-08	0.0001851	Col4a3bp, Cfl1, Spns1, Cog3, Ptpn1, Ap3m1, Lcp2, Appl1, D6Wsu116e, Slc9a9, Ndufa9, Gnb2l1, Slc25a3, 1700039E15Rik, Atp2a2, Atp13a3, Hnrnpa1, Ddx39, Hook1, Gpihbp1, Grk6, Mbtps1, Ikbkb, Chd7, Pecam1, Dync1h1, Abca4, Nupl1, Slc24a3, Use1, Uqcrh, Uqcrc2, Mfn2, Flna, Trp53, Vav1, Rps19, Atp10d, Get4, Csk, Sytl5, Hiat1, Rps15, Ldlrap1, Dnajc14, Lrba, Inpp5k, Eif4a3, Slc28a2, Rpsa, Park7, Kiss1r, Slc16…
GO:0006915	apoptosis	0.08447 ( 62 of 734 genes )	0.04131 ( 1405 of 34011 annotated genes )	1.009e-07	0.0001967	Madd, Pdcd10, Krit1, Hipk1, Gnb2l1, Cflar, Mdm4, Cd5, Tax1bp1, Chd8, Fis1, Rad21, Parl, Dnajb6, Xiap, Cbl, Cd3e, Pdpk1, Ptma, Nqo1, Dnajc10, Ppp3cb, H2-T23, Pak2, Trp53, Ntrk2, Rnf152, Nfkb1, Ski, Sell, Rps3, Acin1, H2-D1, H2-K1, Mef2d, Foxo3, Gpx1, Lsp1, Trp63, Park7, Anxa5, Adam8, Hdac1, Cd27, Tcfap2b, Pdcl3, Ppp2r2b, Eef1e1, Ddx42, 1810046J19Rik, Hmgb1, Pdcd6ip, Gabarap, Lck, Set, Ogt, Itga6, …
GO:0045184	establishment of protein	0.06948 ( 51 of 734 genes )	0.03111 ( 1058 of 34011 annotated genes )	1.028e-07	0.0002005	Cfl1, Egr2, Cog3, Ap3m1, Lcp2, Tnpo3, Spnb2, Appl1, Gnb2l1, Copa, Nup210, Hook1, Gpihbp1, Stxbp2, Nup88, Mbtps1, Rpl11, Pdpk1, Nupl1, Use1, Rab14, Mfn2, Flna, Trp53, Ranbp2, Csk, Sytl5, Ap3b1, Vps35, Dnajc14, Ldlrap1, Arf3, Golga4, Inpp5k, Rabif, Ipo5, Rangrf, Cd27, Ppp2r2b, Sdad1, Snx17, Pdcd6ip, Xpo6, Snx1, Gdi1, Gabarap, Gria2, Mgea5, Stxbp3a, Il6, Cyld,
GO:0016265	death	0.08856 ( 65 of 734 genes )	0.04422 ( 1504 of 34011 annotated genes )	1.038e-07	0.0002025	Pdcd10, Krit1, Gnb2l1, Tax1bp1, Fis1, Prkd2, Parl, Dnajb6, Ptma, Nqo1, Dnajc10, H2-T23, Trp53, Nfkb1, Ski, Sell, Rps3, Acin1, H2-D1, Mef2d, H2-K1, Gpx1, Lsp1, Trp63, Park7, Adam8, Hdac1, Cd27, Tcfap2b, Ddx42, 1810046J19Rik, Hmgb1, Gabarap, Itga6, Sema3a, Mgea5, Rps6ka3, Madd, Cflar, Hipk1, Mdm4, Cd5, Chd8, Rad21, Cd3e, Cbl, Xiap, Pdpk1, Ppp3cb, Pak2, Ntrk2, Rnf152, Foxo3, Afg3l2, Anxa5, Pdcl3, Ee…
GO:0006195	purine nucleotide catabol	0.04223 ( 31 of 734 genes )	0.01429 ( 486 of 34011 annotated genes )	1.06e-07	0.0002067	Zc3hav1, Smap2, Nras, Mras, Arhgap1, Rac2, Arhgap4, Gnb2l1, Tuba1c, Atp2a2, Rapgef2, Atp6v1c1, Irgm2, Dnajb6, Gmip, Atp5a1, Myl4, Abca4, Arhgap9, Gnai2, Rasa3, Dnajc10, Tubb5, Rab14, Mfn2, Vav1, Sema4d, Ntrk2, Eef2, Rictor, Atp10d,
GO:0009893	positive regulation of me	0.09537 ( 70 of 734 genes )	0.04934 ( 1678 of 34011 annotated genes )	1.257e-07	0.0002451	Brd7, Tfam, Gnb2l1, Prkd2, Hcls1, Pecam1, Rnf20, Mysm1, Gm3258, Trp53, Nfkb1, Ski, Mef2d, Rbmxrt, Eif4a3, Inpp5k, Trp63, Adam8, Hdac1, Tbl1x, Cd27, Ccnd3, Tcfap2b, Hmgb1, Itga6, Mgea5, Rps6ka3, Nub1, Kdm5a, Bloc1s2, Egr2, Agxt2, Ldb1, Skap1, Pnpt1, Ash2l, Crebbp, Pbrm1, Chd8, Cd81, Cd3e, Supt4h1, Med12, Cops5, Nfat5, Ddx17, Gtf2f1, Pak2, Ntrk2, Sema4d, Nrd1, Rbm3, Rictor, Sp100, Hnrnpk, Foxo3, Br…
GO:0072523	purine-containing compoun	0.04223 ( 31 of 734 genes )	0.01450 ( 493 of 34011 annotated genes )	1.454e-07	0.0002835	Zc3hav1, Smap2, Nras, Mras, Arhgap1, Rac2, Arhgap4, Gnb2l1, Tuba1c, Atp2a2, Rapgef2, Atp6v1c1, Irgm2, Dnajb6, Gmip, Atp5a1, Myl4, Abca4, Arhgap9, Gnai2, Rasa3, Dnajc10, Tubb5, Rab14, Mfn2, Vav1, Sema4d, Ntrk2, Eef2, Rictor, Atp10d,
GO:0006417	regulation of translation	0.02316 ( 17 of 734 genes )	0.00494 ( 168 of 34011 annotated genes )	1.585e-07	0.0003092	Eif3b, Eif2c4, Caprin1, Foxo3, Eif4g2, Pa2g4, Eif4a3, Gnb2l1, Ppp1ca, Rps5, Ireb2, Rps4x, Patl1, Il6, Rps14, Eif3k, Rbm3,
GO:0012501	programmed cell death	0.08447 ( 62 of 734 genes )	0.04187 ( 1424 of 34011 annotated genes )	1.609e-07	0.0003138	Madd, Pdcd10, Krit1, Hipk1, Gnb2l1, Cflar, Mdm4, Cd5, Tax1bp1, Chd8, Fis1, Rad21, Parl, Dnajb6, Xiap, Cbl, Cd3e, Pdpk1, Ptma, Nqo1, Dnajc10, Ppp3cb, H2-T23, Pak2, Trp53, Ntrk2, Rnf152, Nfkb1, Ski, Sell, Rps3, Acin1, H2-D1, H2-K1, Mef2d, Foxo3, Gpx1, Lsp1, Trp63, Park7, Anxa5, Adam8, Hdac1, Cd27, Tcfap2b, Pdcl3, Ppp2r2b, Eef1e1, Ddx42, 1810046J19Rik, Hmgb1, Pdcd6ip, Gabarap, Lck, Set, Ogt, Itga6, …
GO:0030163	protein catabolic process	0.03815 ( 28 of 734 genes )	0.01235 ( 420 of 34011 annotated genes )	1.782e-07	0.0003475	Ube2i, Fyn, Gpx1, Pcbp2, Afg3l2, Gnb2l1, Mdm4, Adam8, Uhrf2, Tbl1x, Arih2, Taf1, Snx1, Psma5, Psmb4, Smurf2, Rnf20, Psmb7, Crbn, Psmb9, Dnajc10, Usp19, Psmc1, Flna, Cyld, Nub1, Usp9x, Nrd1,
GO:0009144	purine nucleoside triphos	0.04223 ( 31 of 734 genes )	0.01464 ( 498 of 34011 annotated genes )	1.814e-07	0.0003538	Ak5, Smap2, Nras, Mras, Atp1b1, Arhgap1, Rac2, Arhgap4, Gnb2l1, Tuba1c, Atp2a2, Rapgef2, Atp6v1c1, Irgm2, Gmip, Atp5a1, Abca4, Arhgap9, Gnai2, Rasa3, Mgea5, Atp1b3, Tubb5, Rab14, Mfn2, Vav1, Sema4d, Ntrk2, Eef2, Rictor, Atp10d,
GO:0010605	negative regulation of ma	0.07629 ( 56 of 734 genes )	0.03634 ( 1236 of 34011 annotated genes )	1.852e-07	0.0003612	Ube2i, Tspyl2, Ldb1, Brd7, Crebbp, Hipk1, Gnb2l1, Eno1, Mdm4, 1810074P20Rik, Chd8, Ireb2, Sfswap, Dnajb6, Supt4h1, Patl1, Trim21, Dnajc10, Rps14, Flna, Trp53, Sema4d, Tcf25, Sp100, Rbm3, Nfkb1, Ski, Rps3, Caprin1, Eif2c4, Fyn, Rbmxrt, Foxo3, Ibtk, Zbtb20, Pa2g4, Uba3, Eif4a3, Inpp5k, Loxl2, Srsf6, Rtf1, Trp63, Srsf4, Hdac1, Tbl1x, Tcfap2b, Depdc1a, Aes, Dusp22, Hmgb1, Set, Mgea5, Il6, Mll2, Phb,
GO:0008219	cell death	0.08719 ( 64 of 734 genes )	0.04399 ( 1496 of 34011 annotated genes )	1.874e-07	0.0003654	Pdcd10, Krit1, Gnb2l1, Tax1bp1, Fis1, Prkd2, Parl, Dnajb6, Ptma, Nqo1, Dnajc10, H2-T23, Trp53, Nfkb1, Ski, Sell, Rps3, Acin1, H2-D1, H2-K1, Mef2d, Gpx1, Lsp1, Trp63, Park7, Adam8, Hdac1, Cd27, Tcfap2b, Ddx42, 1810046J19Rik, Hmgb1, Gabarap, Itga6, Sema3a, Mgea5, Rps6ka3, Madd, Cflar, Hipk1, Mdm4, Cd5, Chd8, Rad21, Cd3e, Cbl, Xiap, Pdpk1, Ppp3cb, Pak2, Ntrk2, Rnf152, Foxo3, Anxa5, Pdcl3, Eef1e1, Pp…
GO:0022607	cellular component assemb	0.07902 ( 58 of 734 genes )	0.03831 ( 1303 of 34011 annotated genes )	1.996e-07	0.0003893	Tspyl2, Ldb1, Ctsd, Spnb2, Rps25, Pnpt1, Pomp, Thsd4, Tfam, Gnb2l1, Mdm4, Crtc2, Srsf1, Ttn, Actr3, Dync1h1, Pdpk1, Patl1, Actn1, Trim21, Actg1, Cct2, Uqcrh, Add1, Rps14, Flna, Trp53, Rictor, Ski, Rps2, Rps15, Tln1, Mbnl1, Rbmxrt, Nap1l4, Aqp4, Rac2, Inpp5k, Trp63, Rpsa, Anxa5, Kiss1r, Tuba1c, Dlg1, 1810046J19Rik, Hmgb1, Set, Coro1a, Acadm, Crbn, Gria2, Itga6, Ogt, Tubb5, Stxbp3a, Tmod3, Eif3d, S…
GO:0009166	nucleotide catabolic proc	0.04223 ( 31 of 734 genes )	0.01494 ( 508 of 34011 annotated genes )	2.797e-07	0.0005455	Zc3hav1, Smap2, Nras, Mras, Arhgap1, Rac2, Arhgap4, Gnb2l1, Tuba1c, Atp2a2, Rapgef2, Atp6v1c1, Irgm2, Dnajb6, Gmip, Atp5a1, Myl4, Abca4, Arhgap9, Gnai2, Rasa3, Dnajc10, Tubb5, Rab14, Mfn2, Vav1, Sema4d, Ntrk2, Eef2, Rictor, Atp10d,
GO:0009141	nucleoside triphosphate m	0.04223 ( 31 of 734 genes )	0.01497 ( 509 of 34011 annotated genes )	2.919e-07	0.0005692	Ak5, Smap2, Nras, Mras, Atp1b1, Arhgap1, Rac2, Arhgap4, Gnb2l1, Tuba1c, Atp2a2, Rapgef2, Atp6v1c1, Irgm2, Gmip, Atp5a1, Abca4, Arhgap9, Gnai2, Rasa3, Mgea5, Atp1b3, Tubb5, Rab14, Mfn2, Vav1, Sema4d, Ntrk2, Eef2, Rictor, Atp10d,
GO:0032502	developmental process	0.17984 ( 132 of 734 genes )	0.11705 ( 3981 of 34011 annotated genes )	3.191e-07	0.0006223	Hsd11b1, Krit1, Gnb2l1, Uhrf2, Fis1, Hcls1, Dnajb6, Ttn, Chd7, H2-T23, Flna, Trp53, Nfkb1, Morc3, Mef2d, H2-K1, Psd4, Hdac1, Adam8, Tbl1x, Cd27, Tcfap2b, Myl6, Lgr5, Itga6, Sema3a, Stxbp3a, Lama2, Rpl38, Itga4, Arhgap4, 4932438A13Rik, Med12, Atp5a1, Actr3, Actg1, Add1, Ppp3cb, Ddx17, Mdm1, Caprin1, Atp1b1, Utrn, Nid1, Ly6e, Fli1, Mark2, Dock2, Arih2, Med28, Aes, Lck, Acadm, Meis1, Ogt, Mll2, Klk1…
GO:0034621	cellular macromolecular c	0.04223 ( 31 of 734 genes )	0.01508 ( 513 of 34011 annotated genes )	3.457e-07	0.0006741	Cfl1, Tspyl2, Rps2, Rps15, Mbnl1, Rbmxrt, Spnb2, Nap1l4, Rps25, Pomp, Tfam, Rpsa, Srsf1, Tuba1c, Dlg1, Ttn, Hmgb1, Actr3, Dync1h1, Set, Coro1a, Patl1, Cct2, Add1, Tubb5, Rps14, Flna, Tmod3, Eif3d, Spna2, Rictor,
GO:0009894	regulation of catabolic p	0.03951 ( 29 of 734 genes )	0.01353 ( 460 of 34011 annotated genes )	3.465e-07	0.0006757	Zc3hav1, Smap2, Fyn, Gpx1, Arhgap1, Pnpt1, Hsd11b1, Arhgap4, Gnb2l1, Mdm4, Adam8, Rapgef2, Ppp1ca, Dnajb6, Gmip, Taf1, Hmgb1, Snx1, Myl4, Arhgap9, Rasa3, Dnajc10, Flna, Vav1, Sema4d, Ntrk2, Nub1, Rictor, Nrd1,
GO:0010608	posttranscriptional regul	0.03270 ( 24 of 734 genes )	0.00985 ( 335 of 34011 annotated genes )	3.686e-07	0.0007188	Eif3b, Cog3, Eif2c4, Caprin1, Foxo3, Eif4g2, Pa2g4, Eif4a3, Gnb2l1, Park7, Ppp1ca, Gpihbp1, Rps5, Rps4x, Ireb2, Patl1, Trim21, Rps14, Il6, Usp19, Flna, Eif3k, Rbm3, Morc3,
GO:0006955	immune response	0.04905 ( 36 of 734 genes )	0.01926 ( 655 of 34011 annotated genes )	3.987e-07	0.0007775	Phpt1, Skap1, Pcbp2, Gbp1, Irgm2, Klhl6, Stxbp2, Prkd2, Cd3e, Pdpk1, Klrg1, Ppp3cb, H2-T23, Trp53, Vav1, Ly86, Sp100, H2-D1, Csk, Fyn, H2-K1, Gpx1, Aqp4, Trim56, Txk, Adam8, Dlg1, Hmgb1, Cd4, Lck, Psmb4, Zap70, Mapkapk3, Il6, Pik3cd, Rps6ka3,
GO:0031324	negative regulation of ce	0.07221 ( 53 of 734 genes )	0.03443 ( 1171 of 34011 annotated genes )	4.114e-07	0.0008021	Ube2i, Tspyl2, Ldb1, Brd7, Crebbp, Hipk1, Gnb2l1, Eno1, Mdm4, 1810074P20Rik, Chd8, Ireb2, Sfswap, Dnajb6, Supt4h1, Patl1, Trim21, Dnajc10, Rps14, Trp53, Sema4d, Tcf25, Sp100, Nfkb1, Ski, Rps3, Caprin1, Eif2c4, Foxo3, Ibtk, Rbmxrt, Zbtb20, Pa2g4, Uba3, Eif4a3, Inpp5k, Loxl2, Srsf6, Rtf1, Trp63, Srsf4, Hdac1, Tbl1x, Tcfap2b, Depdc1a, Aes, Dusp22, Hmgb1, Set, Mgea5, Il6, Mll2, Phb,
GO:0009205	purine ribonucleoside tri	0.04087 ( 30 of 734 genes )	0.01447 ( 492 of 34011 annotated genes )	4.416e-07	0.0008611	Ak5, Smap2, Nras, Mras, Atp1b1, Arhgap1, Rac2, Arhgap4, Gnb2l1, Tuba1c, Atp2a2, Rapgef2, Atp6v1c1, Irgm2, Gmip, Atp5a1, Abca4, Arhgap9, Gnai2, Rasa3, Atp1b3, Tubb5, Rab14, Mfn2, Vav1, Sema4d, Ntrk2, Eef2, Rictor, Atp10d,
GO:0006366	transcription from RNA po	0.07357 ( 54 of 734 genes )	0.03558 ( 1210 of 34011 annotated genes )	4.925e-07	0.0009603	Egr2, Bloc1s2, Ube2i, Skap1, Ldb1, Brd7, Ash2l, Crebbp, Hipk1, Mdm4, Supt6h, Chd8, Rbm16, Rad21, Prkd2, Supt4h1, Setx, Med12, Brwd1, Cops5, Nfat5, Rps14, Ddx17, Gtf2f1, Trp53, Sema4d, Tcf25, Sp100, Nfkb1, Ski, Hnrnpk, Mef2d, Rbmxrt, Foxo3, Zbtb20, Eif4a3, Rtf1, Trp63, Txk, Hdac1, Tbl1x, Tcfap2b, Thrap3, Aes, Dusp22, Taf1, Hmgb1, Meis1, Itga6, Il6, Mll2, Rps6ka3, Elf4, Phb,
GO:0043484	regulation of RNA splicin	0.01362 ( 10 of 734 genes )	0.00173 ( 59 of 34011 annotated genes )	4.992e-07	0.0009734	Hnrnpf, Sfswap, Rbmy1a1, Malat1, Mbnl1, Rbmxrt, Snrnp70, Eif4a3, Srsf6, Srsf4,
GO:0048024	regulation of nuclear mRN	0.01090 ( 8 of 734 genes )	0.00100 ( 34 of 34011 annotated genes )	5.007e-07	0.0009765	Sfswap, Rbmy1a1, Malat1, Mbnl1, Rbmxrt, Eif4a3, Srsf6, Srsf4,
GO:0009199	ribonucleoside triphospha	0.04087 ( 30 of 734 genes )	0.01455 ( 495 of 34011 annotated genes )	5.015e-07	0.0009779	Ak5, Smap2, Nras, Mras, Atp1b1, Arhgap1, Rac2, Arhgap4, Gnb2l1, Tuba1c, Atp2a2, Rapgef2, Atp6v1c1, Irgm2, Gmip, Atp5a1, Abca4, Arhgap9, Gnai2, Rasa3, Atp1b3, Tubb5, Rab14, Mfn2, Vav1, Sema4d, Ntrk2, Eef2, Rictor, Atp10d,
GO:0008283	cell proliferation	0.07766 ( 57 of 734 genes )	0.03846 ( 1308 of 34011 annotated genes )	5.041e-07	0.000983	Col4a3bp, Mta3, Itgad, Brd7, Appl1, Pdcd10, Ash2l, AY036118, Crebbp, Krit1, Hipk1, Pbrm1, Mdm4, Uhrf2, Naa35, Cd81, Prkd2, Hcls1, Cd3e, Morf4l1, Atp5a1, Mfn2, Trp53, Ntrk2, Rictor, Morc3, Ski, Csk, Rpl29, Fyn, Foxo3, Gpx1, Prkar1a, Rac2, Loxl2, Trp63, Park7, Hdac1, Kiss1r, Ccnd3, Cd27, Dock2, Tcfap2b, Dlg1, Rps4x, Arih2, Eef1e1, Dusp22, Hmgb1, Zap70, Coro1a, Acer3, Gnai2, Mll2, Il6, Phb, Elf4,
