# Supplementary material for: The Y chromosome as a regulatory element shaping immune cell transcriptomes and susceptibility to autoimmune disease
Source: HighWire-hosted journal article supplement (doi:10.1101/gr.156703.113), 2013-06-25
Supplement: Supplemental_Tables.zip [file Table S5_ChromatinArray.xlsx]

## Sheet: Sheet1
Table S5. Mouse epigenetic chromatin remodeling gene qPCR array on CD4+ T cells from B6-ChrY^SJL vs. B6 mice.
Gene	Fold Change	P value
Arid1a	1.0395	0.555995
Arid2	1.4859	0.099335
Asxl1	1.8543	0.123082
Baz1a	0.9661	0.799121
Baz1b	1.4957	0.008721
Baz2a	1.4977	0.000353
Baz2b	1.4818	0.095367
Bmi1	1.2843	0.092005
Bptf	1.1734	0.102768
Brd1	1.5348	0.000783
Brd2	1.7063	0.003079
Brd3	1.5827	0.021239
Brd4	1.5596	0.006468
Brd7	1.0132	0.838708
Brd8	1.3412	0.0232
Brdt	0.9134	0.553403
Brpf1	1.35	0.045323
Brpf3	1.8345	3.4e-05
Brwd1	1.519	0.006551
Brwd3	1.4056	0.006126
Cbx1	1.2269	0.116371
Cbx2	1.678	0.022308
Cbx3	1.0946	0.459443
Cbx4	1.7204	0.165812
Cbx5	1.2233	0.018152
Cbx6	1.6398	0.049808
Cbx7	1.8227	0.002027
Cbx8	1.28	0.014342
Cdyl	1.5359	0.01731
Cdyl2	1.8325	0.003371
Chd1	1.1528	0.015285
Chd2	1.5916	0.015029
Chd3	1.7618	0.004419
Chd4	1.6203	0.004312
Chd5	4.2309	0.003861
Chd6	1.9507	0.134735
Chd7	2.2139	0.034501
Chd8	2.0181	0.002009
Chd9	3.274	0.088109
Ctbp1	1.7181	0.008807
Ctbp2	1.6994	0.046613
Ctcf	1.5961	0.060878
Eed	1.1446	0.105279
Ezh2	1.0314	0.592527
Hinfp	1.7274	0.019358
Ing1	1.3839	0.014503
Ing2	1.2189	0.053103
Ing3	1.3142	0.04156
Ing4	1.5774	0.019575
Ing5	1.7559	0.013039
Ino80	1.6784	0.003125
Mbd1	1.7351	0.01178
Mbd3	1.4751	0.011017
Mbd4	2.0332	0.013517
Mecp2	1.1311	0.357145
Mta1	1.4469	0.094455
Mta2	1.4521	0.03871
Nab2	1.4998	0.035671
Nsd1	1.6858	0.011955
Pcgf1	1.2264	0.138838
Pcgf2	2.4519	0.002453
Pcgf3	1.4862	0.009416
Pcgf5	1.2717	0.008683
Pcgf6	1.4614	0.017817
Phc1	1.4053	0.122738
Phc2	1.486	0.002019
Phf1	1.4921	0.144931
Phf13	1.4768	0.053235
Phf2	1.5983	0.107159
Phf21b	1.6506	0.233895
Phf3	1.2848	0.005598
Phf5a	1.8285	0.003685
Phf6	1.2675	0.002691
Phf7	1.6122	0.017381
Ring1	1.6187	0.198584
Rnf2	1.1738	0.037418
Smarca2	1.508	0.000409
Smarca4	1.6143	0.002507
Smarca5	1.126	0.052002
Spen	1.3649	0.03105
Suz12	1.5176	0.023474
Trim27	0.9621	0.642925
Wdr11	1.779	0.086188
Zmynd8	1.5517	0.032298
Actb	1.6361	0.09337
B2m	0.8984	0.21624
Gapdh	1.609	0.006247
Gusb	1.096	0.349494
Hsp90ab1	1.408	0.111733
MGDC	0.9134	0.553403
RTC	0.9184	0.394094
RTC	0.9627	0.76245
RTC	0.9354	0.538308
PPC	0.865	0.384985
PPC	0.8893	0.449812
PPC	0.8546	0.306974
