# Supplementary material for: The Y chromosome as a regulatory element shaping immune cell transcriptomes and susceptibility to autoimmune disease
Source: HighWire-hosted journal article supplement (doi:10.1101/gr.156703.113), 2013-06-25
Supplement: Supplemental_Tables.zip [file Table S6_SJLTcell_GOTerms.xlsx]

## Sheet: YmusvsSJLTcellFDR0.05PlusAltSpl
Table S6. GO term analysis on CD4+ T cell alternatively spliced transcripts (FDR<0.05) from SJL-ChrYB10.S vs. SJL dataset. Terms with P<1.0E-3 are shown.
GOID	GO_term	Frequency	Genome frequency	P-value	Corrected P-value	Gene(s) Directly Annotated GOID list
GO:0044260	cellular macromolecule me	0.40922 ( 142 of 347 genes )	0.16512 ( 5616 of 34011 annotated genes )	1.856e-27	2.515e-24	A830007P12Rik, Csnk1a1, Brd7, Zfp174, Tceb3, Hsp90aa1, Orc5, Kdm5d, Sap18, Rplp0, Map3k5, Rpp40, Cops7a, Rnf182, Atad1, Ube2h, Rock1, Zfp661, Ppia, Rps3, Dusp11, Ldlrap1, Hoxa13, Foxn3, Eif4g2, Rps28, Dock7, Cct8, Eomes, Araf, Klf16, Ubr5, Pax2, Smarcc1, Anapc1, Rpl14, Fgf9, Hivep1, Uimc1, Mrps16, Eftud1, Gnas, Celf2, Padi6, Ext2, Nme7, Npm1, Aak1, Bax, Stra13, Usp16, Itgb1, Taok1, Rpf1, Uchl5, H…
GO:0044238	primary metabolic process	0.48415 ( 168 of 347 genes )	0.22525 ( 7661 of 34011 annotated genes )	1.914e-26	2.594e-23	A830007P12Rik, Csnk1a1, Brd7, Zfp174, Tceb3, Hsp90aa1, Orc5, Kdm5d, Sap18, Rplp0, Map3k5, Rpp40, Elovl1, Cops7a, Rab2a, Rnf182, Atad1, Sipa1l1, Ube2h, Rock1, Zfp661, Ppia, Rps3, Fuca2, Galk2, Dusp11, Ldlrap1, Hoxa13, Foxn3, Eif4g2, Rps28, Dock7, Cct8, Eomes, Araf, Klf16, Ubr5, Plcb2, Inpp4b, Pax2, Smarcc1, Anapc1, Rpl14, Fgf9, Hivep1, Uimc1, Arap2, Mrps16, Eftud1, Avpr1a, Gnas, Celf2, Padi6, Ext2…
GO:0043170	macromolecule metabolic p	0.43516 ( 151 of 347 genes )	0.18900 ( 6428 of 34011 annotated genes )	3.825e-26	5.183e-23	A830007P12Rik, Csnk1a1, Brd7, Zfp174, Tceb3, Hsp90aa1, Orc5, Kdm5d, Sap18, Rplp0, Map3k5, Rpp40, Cops7a, Rnf182, Atad1, Ube2h, Rock1, Zfp661, Ppia, Rps3, Dusp11, Ldlrap1, Hoxa13, Foxn3, Eif4g2, Rps28, Dock7, Cct8, Eomes, Araf, Klf16, Ubr5, Pax2, Smarcc1, Anapc1, Rpl14, Fgf9, Hivep1, Uimc1, Mrps16, Eftud1, Gnas, Celf2, Padi6, Ext2, Hyal1, Nme7, Npm1, Aak1, Bax, Stra13, Usp16, Itgb1, Taok1, Rpf1, U…
GO:0044237	cellular metabolic proces	0.47550 ( 165 of 347 genes )	0.22384 ( 7613 of 34011 annotated genes )	3.165e-25	4.288e-22	Pdxdc1, A830007P12Rik, Csnk1a1, Brd7, Zfp174, Tceb3, Hsp90aa1, Orc5, Kdm5d, Sap18, Rplp0, Map3k5, Rpp40, Elovl1, Cops7a, Rab2a, Rnf182, Atad1, Sipa1l1, Ube2h, Rock1, Zfp661, Ppia, Rps3, Fuca2, Galk2, Dusp11, Ldlrap1, Wbscr22, Hoxa13, Foxn3, Eif4g2, 6430573F11Rik, Rps28, Dock7, Cct8, Eomes, Araf, Klf16, Ubr5, Inpp4b, Pax2, Smarcc1, Anapc1, Rpl14, Fgf9, Hivep1, Uimc1, Arap2, Mrps16, Eftud1, Avpr1a,…
GO:0008152	metabolic process	0.52450 ( 182 of 347 genes )	0.26565 ( 9035 of 34011 annotated genes )	8.138e-25	1.103e-21	Pdxdc1, A830007P12Rik, Csnk1a1, 1110031I02Rik, Brd7, Zfp174, Tceb3, Hsp90aa1, Orc5, Kdm5d, Sap18, Rplp0, Map3k5, Rpp40, Elovl1, Cops7a, Rab2a, Rnf182, Atad1, Sipa1l1, Ube2h, Rock1, Zfp661, Ppia, Rps3, Fuca2, Galk2, Dusp11, Ldlrap1, Wbscr22, Hoxa13, Foxn3, Eif4g2, 6430573F11Rik, Rps28, Dock7, Cct8, Eomes, Araf, Klf16, Ubr5, Plcb2, Inpp4b, Pax2, Smarcc1, Anapc1, Rpl14, Fgf9, Hivep1, Uimc1, Neu2, Ar…
GO:0009987	cellular process	0.66282 ( 230 of 347 genes )	0.39346 (13382 of 34011 annotated genes )	2.15e-24	2.914e-21	Pdxdc1, Ppp1r9a, A830007P12Rik, Kif21b, Csnk1a1, St7l, Brd7, Slc22a18, Zfp174, Slc20a1, Tceb3, Hsp90aa1, Orc5, 2700094K13Rik, Tctn2, Kdm5d, Sap18, Rplp0, Map3k5, Rpp40, Mpp1, Elovl1, Cops7a, Rab2a, Mov10l1, Rnf182, Atad1, Exoc5, Sipa1l1, Ube2h, Rock1, Scfd1, Zfp661, Ppia, Rps3, Nup160, Fuca2, Galk2, Dusp11, Tln1, Ldlrap1, Wbscr22, Hoxa13, Foxn3, Eif4g2, 6430573F11Rik, Rps28, Dock7, Cct8, Eomes, A…
GO:0071840	cellular component organi	0.27378 ( 95 of 347 genes )	0.10864 ( 3695 of 34011 annotated genes )	8.31e-18	1.126e-14	Fzd5, Ppp1r9a, Pcbd2, Csnk1a1, St7l, 4930579C15Rik, Brd7, Znrf1, Psip1, Hsp90aa1, Tctn2, Kdm5d, Ap1s2, Atp6v0e, Sap18, Rplp0, Rptor, Atad1, Gnai3, Ppp2r5d, Sipa1l1, Rock1, Pole4, Chd4, Endog, Lama3, Tln1, Ldlrap1, Mbnl1, Hoxa13, Rps28, Gata1, Dock7, Eomes, Arl8b, Ash1l, Hnrnpab, Gypa, Pax2, Gpr143, Aebp2, Prpf31, Smarcc1, Anapc1, Myo1b, Rpl14, Derl2, Wasf2, Myh2, Fnbp1, Pogz, Uimc1, Arhgap21, Eft…
GO:0006807	nitrogen compound metabol	0.31412 ( 109 of 347 genes )	0.13916 ( 4733 of 34011 annotated genes )	3.938e-17	5.336e-14	Fzd5, Alkbh3, Pcbd2, Cdk13, Brd7, Upf2, Zfp174, Psip1, Tceb3, Hsp90aa1, Orc5, Cpeb2, Sap18, Rpp40, Rptor, Rab2a, Atad1, Gnai3, Ppp2r5d, Sipa1l1, Slco4a1, Impad1, Chi3l3, Asrgl1, Zfp661, Csde1, Fto, Rps3, Chd4, Ebf2, Endog, Atp1a1, Mbnl1, Hoxa13, Foxn3, Eif4g2, Uty, Rps28, Med13, Gata1, Dock7, Eomes, Klf16, Ikzf1, Ash1l, Hnrnpab, Pax2, Aebp2, Prpf31, Trim30a, Casc3, Smarcc1, Cnot1, Rpl14, Fgf9, Hi…
GO:0044267	cellular protein metaboli	0.23343 ( 81 of 347 genes )	0.08527 ( 2900 of 34011 annotated genes )	4.24e-17	5.745e-14	Fzd5, Hspa5, A830007P12Rik, Csnk1a1, Cdk13, Mobkl1a, Brd7, Znrf1, Rnf34, Hsp90aa1, Kdm5d, Cpeb2, Rplp0, Map3k5, Rptor, Cops7a, Rnf182, Ppp2r5d, Ube2h, Rock1, Hspa9, Ppia, Pole4, Rps3, Dusp11, Eif4g2, Nmt2, Rps28, Gata1, Dock7, Cct8, Araf, Cct7, Ubr1, Ppp1ca, Ubr5, Mrpl35, Trim30a, Casc3, Rassf1, Cct6a, Anapc1, Rpl14, Aph1a, Derl2, Uimc1, Mrps16, Eftud1, Pigc, Gnas, Ash2l, Padi6, Hat1, Cct5, Mak, …
GO:0006139	nucleobase, nucleoside, n	0.29395 ( 102 of 347 genes )	0.12602 ( 4286 of 34011 annotated genes )	6.886e-17	9.33e-14	Fzd5, Alkbh3, Pcbd2, Cdk13, Brd7, Upf2, Zfp174, Psip1, Tceb3, Hsp90aa1, Orc5, Cpeb2, Sap18, Rpp40, Rptor, Rab2a, Atad1, Gnai3, Ppp2r5d, Sipa1l1, Zfp661, Csde1, Fto, Rps3, Chd4, Ebf2, Endog, Atp1a1, Mbnl1, Hoxa13, Foxn3, Eif4g2, Uty, Rps28, Med13, Gata1, Dock7, Eomes, Klf16, Ikzf1, Ash1l, Hnrnpab, Pax2, Aebp2, Prpf31, Trim30a, Casc3, Smarcc1, Cnot1, Rpl14, Fgf9, Hivep1, Uimc1, Arap2, Eftud1, Gnas,…
GO:0010467	gene expression	0.27089 ( 94 of 347 genes )	0.11032 ( 3752 of 34011 annotated genes )	7.039e-17	9.538e-14	Fzd5, Alkbh3, Pcbd2, Cdk13, Brd7, Zfp174, Psip1, Tceb3, Cpeb2, Sap18, Rplp0, Rpp40, Rptor, Ppp2r5d, Zfp661, Csde1, Fto, Rps3, Chd4, Ebf2, Mbnl1, Hoxa13, Foxn3, Eif4g2, Ccr1, Uty, Rps28, Med13, Gata1, Eomes, Klf16, Ikzf1, Ash1l, Hnrnpab, Ppp1ca, Mrpl35, Pax2, Aebp2, Prpf31, Trim30a, Casc3, Rassf1, Smarcc1, Cnot1, Rpl14, Aph1a, Fgf9, Hivep1, Uimc1, Mrps16, Eftud1, Gnas, Ash2l, Celf2, Rsf1, Ascc3, X…
GO:0019538	protein metabolic process	0.25360 ( 88 of 347 genes )	0.10229 ( 3479 of 34011 annotated genes )	5.434e-16	7.363e-13	Fzd5, Hspa5, A830007P12Rik, Csnk1a1, Cdk13, Mobkl1a, Brd7, Znrf1, Rnf34, Hsp90aa1, Prss45, Kdm5d, Cpeb2, Rplp0, Map3k5, Rptor, Cops7a, Rnf182, Ppp2r5d, Ube2h, Rock1, Hspa9, Ppia, Pole4, Rps3, Dusp11, 3110056O03Rik, Eif4g2, Nmt2, Rps28, Gata1, Dock7, Cct8, Araf, Cct7, Ubr1, Ppp1ca, Ubr5, Sppl3, Mrpl35, Trim30a, Casc3, Rassf1, Cct6a, Anapc1, Rpl14, Aph1a, Derl2, Uimc1, Mrps16, Eftud1, Pigc, Gnas, A…
GO:0034641	cellular nitrogen compoun	0.30259 ( 105 of 347 genes )	0.13631 ( 4636 of 34011 annotated genes )	6.142e-16	8.322e-13	Fzd5, Alkbh3, Pcbd2, Cdk13, Brd7, Upf2, Zfp174, Psip1, Tceb3, Hsp90aa1, Orc5, Cpeb2, Sap18, Rpp40, Rptor, Rab2a, Atad1, Gnai3, Ppp2r5d, Sipa1l1, Slco4a1, Asrgl1, Zfp661, Csde1, Fto, Rps3, Chd4, Ebf2, Endog, Atp1a1, Mbnl1, Hoxa13, Foxn3, Eif4g2, Uty, Rps28, Med13, Gata1, Dock7, Eomes, Klf16, Ikzf1, Ash1l, Hnrnpab, Pax2, Aebp2, Prpf31, Trim30a, Casc3, Smarcc1, Cnot1, Rpl14, Fgf9, Hivep1, Uimc1, Ara…
GO:0016043	cellular component organi	0.25648 ( 89 of 347 genes )	0.10476 ( 3563 of 34011 annotated genes )	7.492e-16	1.015e-12	Fzd5, Ppp1r9a, Pcbd2, Csnk1a1, St7l, 4930579C15Rik, Brd7, Znrf1, Psip1, Hsp90aa1, Tctn2, Kdm5d, Ap1s2, Atp6v0e, Sap18, Rptor, Atad1, Gnai3, Ppp2r5d, Sipa1l1, Rock1, Pole4, Chd4, Endog, Lama3, Tln1, Ldlrap1, Mbnl1, Hoxa13, Gata1, Dock7, Eomes, Arl8b, Ash1l, Hnrnpab, Gypa, Pax2, Gpr143, Aebp2, Prpf31, Smarcc1, Anapc1, Myo1b, Derl2, Wasf2, Myh2, Fnbp1, Pogz, Uimc1, Arhgap21, Eftud1, Avpr1a, Ash2l, C…
GO:0090304	nucleic acid metabolic pr	0.25360 ( 88 of 347 genes )	0.10308 ( 3506 of 34011 annotated genes )	8.633e-16	1.17e-12	Fzd5, Alkbh3, Pcbd2, Cdk13, Brd7, Upf2, Zfp174, Psip1, Tceb3, Orc5, Sap18, Rpp40, Rptor, Ppp2r5d, Zfp661, Csde1, Fto, Rps3, Chd4, Ebf2, Endog, Mbnl1, Hoxa13, Foxn3, Eif4g2, Uty, Rps28, Med13, Gata1, Eomes, Klf16, Ikzf1, Ash1l, Hnrnpab, Pax2, Aebp2, Prpf31, Trim30a, Casc3, Smarcc1, Cnot1, Rpl14, Fgf9, Hivep1, Uimc1, Gnas, Ash2l, Celf2, Rsf1, Ascc3, Xpo1, Hat1, Mak, Whsc1l1, Sigirr, Npm1, Peli1, Ba…
GO:0016070	RNA metabolic process	0.23343 ( 81 of 347 genes )	0.09182 ( 3123 of 34011 annotated genes )	2.818e-15	3.819e-12	Fzd5, Pcbd2, Cdk13, Brd7, Upf2, Zfp174, Psip1, Tceb3, Sap18, Rpp40, Rptor, Ppp2r5d, Zfp661, Csde1, Fto, Rps3, Chd4, Ebf2, Mbnl1, Hoxa13, Foxn3, Eif4g2, Uty, Rps28, Med13, Gata1, Eomes, Klf16, Ikzf1, Ash1l, Hnrnpab, Pax2, Aebp2, Prpf31, Trim30a, Casc3, Smarcc1, Cnot1, Rpl14, Fgf9, Hivep1, Uimc1, Gnas, Ash2l, Celf2, Rsf1, Ascc3, Xpo1, Hat1, Mak, Whsc1l1, Sigirr, Npm1, Peli1, Exosc8, Usp16, Hars, La…
GO:0034645	cellular macromolecule bi	0.23343 ( 81 of 347 genes )	0.09820 ( 3340 of 34011 annotated genes )	1.099e-13	1.49e-10	Fzd5, Pcbd2, Cdk13, Brd7, Zfp174, Psip1, Tceb3, Orc5, Cpeb2, Sap18, Rplp0, Rptor, Ppp2r5d, Zfp661, Csde1, Rps3, Chd4, Ebf2, Hoxa13, Foxn3, Eif4g2, Nmt2, Uty, Rps28, Med13, Gata1, Eomes, Klf16, Ikzf1, Ash1l, Hnrnpab, Ppp1ca, Mrpl35, Pax2, Aebp2, Trim30a, Casc3, Smarcc1, Cnot1, Rpl14, Fgf9, Hivep1, Uimc1, Mrps16, Eftud1, Pigc, Gnas, Ash2l, Rsf1, Ascc3, Xpo1, Hat1, Mak, Ext2, Mrps2, Whsc1l1, Sigirr,…
GO:0009059	macromolecule biosyntheti	0.23631 ( 82 of 347 genes )	0.10073 ( 3426 of 34011 annotated genes )	1.503e-13	2.037e-10	Fzd5, Pcbd2, Cdk13, Brd7, Zfp174, Psip1, Tceb3, Orc5, Cpeb2, Sap18, Rplp0, Rptor, Ppp2r5d, Zfp661, Csde1, Rps3, Chd4, Ebf2, Hoxa13, Foxn3, Eif4g2, Nmt2, Uty, Rps28, Med13, Gata1, Eomes, Klf16, Ikzf1, Ash1l, Hnrnpab, Ppp1ca, Mrpl35, Pax2, Aebp2, Trim30a, Casc3, Smarcc1, Cnot1, Rpl14, Fgf9, Hivep1, Uimc1, Mrps16, Eftud1, Pigc, Gnas, Ash2l, Rsf1, Ascc3, Xpo1, Hat1, Mak, Ext2, Mrps2, Hyal1, Whsc1l1, …
GO:0071841	cellular component organi	0.21037 ( 73 of 347 genes )	0.08456 ( 2876 of 34011 annotated genes )	2.753e-13	3.731e-10	Fzd5, Ppp1r9a, Csnk1a1, St7l, 4930579C15Rik, Brd7, Znrf1, Psip1, Hsp90aa1, Tctn2, Kdm5d, Sap18, Rplp0, Gnai3, Ppp2r5d, Sipa1l1, Rock1, Pole4, Chd4, Endog, Lama3, Tln1, Mbnl1, Hoxa13, Rps28, Gata1, Dock7, Arl8b, Ash1l, Gypa, Gpr143, Aebp2, Prpf31, Smarcc1, Anapc1, Myo1b, Rpl14, Wasf2, Pogz, Uimc1, Arhgap21, Eftud1, Ash2l, Celf2, Rsf1, Xpo1, Hat1, Vps18, Col4a5, Rrs1, Nme7, Whsc1l1, Npm1, Bax, Stra…
GO:0044249	cellular biosynthetic pro	0.26225 ( 91 of 347 genes )	0.12202 ( 4150 of 34011 annotated genes )	7.311e-13	9.907e-10	Fzd5, Pcbd2, Cdk13, Brd7, Zfp174, Elovl6, Psip1, Tceb3, Orc5, Hsp90aa1, Cpeb2, Sap18, Rplp0, Rptor, Elovl1, Gnai3, Ppp2r5d, Zfp661, Csde1, Rps3, Chd4, Ebf2, Atp1a1, Hoxa13, Foxn3, Eif4g2, Nmt2, Uty, Rps28, Med13, Gata1, Eomes, Klf16, Ikzf1, Ash1l, Hnrnpab, Ppp1ca, Mrpl35, Pax2, Aebp2, Trim30a, Casc3, Smarcc1, Cnot1, Rpl14, Fgf9, Hivep1, Uimc1, Mrps16, Eftud1, Avpr1a, Pigc, Gnas, Ash2l, Rsf1, Ascc…
GO:0031323	regulation of cellular me	0.25072 ( 87 of 347 genes )	0.11417 ( 3883 of 34011 annotated genes )	8.657e-13	1.173e-09	Fzd5, Hspa5, Pcbd2, Cdk13, Mobkl1a, Brd7, Zfp174, Psip1, Tceb3, Hsp90aa1, Cpeb2, Sap18, Map3k5, Rptor, Atad1, Gnai3, Ppp2r5d, Sipa1l1, Zfp661, Csde1, Rps3, Chd4, Ebf2, Atp1a1, Mbnl1, Hoxa13, Foxn3, Eif4g2, Uty, Med13, Gata1, Dock7, Eomes, Araf, Klf16, Ikzf1, Ash1l, Hnrnpab, Ppp1ca, Pax2, Aebp2, Trim30a, Casc3, Rassf1, Smarcc1, Cnot1, Fgf9, Hivep1, Uimc1, Arap2, Avpr1a, Gnas, Ash2l, Rsf1, Ascc3, X…
GO:0009058	biosynthetic process	0.26513 ( 92 of 347 genes )	0.12543 ( 4266 of 34011 annotated genes )	1.351e-12	1.831e-09	Fzd5, Pcbd2, Cdk13, Brd7, Zfp174, Elovl6, Psip1, Tceb3, Orc5, Hsp90aa1, Cpeb2, Sap18, Rplp0, Rptor, Elovl1, Gnai3, Ppp2r5d, Zfp661, Csde1, Rps3, Chd4, Ebf2, Atp1a1, Hoxa13, Foxn3, Eif4g2, Nmt2, Uty, Rps28, Med13, Gata1, Eomes, Klf16, Ikzf1, Ash1l, Hnrnpab, Ppp1ca, Mrpl35, Pax2, Aebp2, Trim30a, Casc3, Smarcc1, Cnot1, Rpl14, Fgf9, Hivep1, Uimc1, Mrps16, Eftud1, Avpr1a, Pigc, Gnas, Ash2l, Rsf1, Ascc…
GO:0019222	regulation of metabolic p	0.27378 ( 95 of 347 genes )	0.13337 ( 4536 of 34011 annotated genes )	2.772e-12	3.757e-09	Fzd5, Hspa5, Alkbh3, Pcbd2, Cdk13, Mobkl1a, Brd7, Zfp174, Psip1, Tceb3, Hsp90aa1, Cpeb2, Sap18, Map3k5, Tnfaip8, Rptor, Atad1, Gnai3, Ppp2r5d, Sipa1l1, Zfp661, Csde1, Fto, Rps3, Chd4, Ebf2, Atp1a1, Mbnl1, Hoxa13, Foxn3, Eif4g2, Ccr1, Uty, Med13, Gata1, Dock7, Eomes, Araf, Klf16, Ikzf1, Ash1l, Hnrnpab, Ppp1ca, Pax2, Aebp2, Trim30a, Casc3, Rassf1, Smarcc1, Cnot1, Aph1a, Fgf9, Hivep1, Uimc1, Arap2, …
GO:0080090	regulation of primary met	0.24207 ( 84 of 347 genes )	0.11152 ( 3793 of 34011 annotated genes )	4.521e-12	6.126e-09	Fzd5, Hspa5, Pcbd2, Cdk13, Brd7, Zfp174, Psip1, Tceb3, Cpeb2, Sap18, Map3k5, Rptor, Gnai3, Ppp2r5d, Sipa1l1, Zfp661, Csde1, Rps3, Chd4, Ebf2, Atp1a1, Mbnl1, Hoxa13, Foxn3, Eif4g2, Uty, Med13, Gata1, Dock7, Eomes, Araf, Klf16, Ikzf1, Ash1l, Hnrnpab, Ppp1ca, Pax2, Aebp2, Trim30a, Casc3, Rassf1, Smarcc1, Cnot1, Fgf9, Hivep1, Uimc1, Arap2, Avpr1a, Gnas, Ash2l, Rsf1, Ascc3, Xpo1, Hat1, Mak, Whsc1l1, S…
GO:0010468	regulation of gene expres	0.20749 ( 72 of 347 genes )	0.08894 ( 3025 of 34011 annotated genes )	8.822e-12	1.195e-08	Fzd5, Alkbh3, Pcbd2, Cdk13, Brd7, Zfp174, Psip1, Tceb3, Cpeb2, Sap18, Rptor, Ppp2r5d, Zfp661, Csde1, Fto, Rps3, Chd4, Ebf2, Mbnl1, Hoxa13, Foxn3, Eif4g2, Ccr1, Uty, Med13, Gata1, Eomes, Klf16, Ikzf1, Ash1l, Hnrnpab, Ppp1ca, Pax2, Aebp2, Trim30a, Casc3, Rassf1, Smarcc1, Cnot1, Fgf9, Hivep1, Uimc1, Gnas, Ash2l, Rsf1, Ascc3, Xpo1, Hat1, Mak, Sigirr, Whsc1l1, Npm1, Aak1, Peli1, Bax, Usp16, Suds3, Hox…
GO:0051171	regulation of nitrogen co	0.20461 ( 71 of 347 genes )	0.08847 ( 3009 of 34011 annotated genes )	1.899e-11	2.573e-08	Fzd5, Pcbd2, Cdk13, Brd7, Zfp174, Psip1, Tceb3, Hsp90aa1, Cpeb2, Sap18, Rptor, Gnai3, Ppp2r5d, Sipa1l1, Zfp661, Csde1, Rps3, Chd4, Ebf2, Mbnl1, Hoxa13, Foxn3, Uty, Med13, Gata1, Dock7, Eomes, Klf16, Ikzf1, Ash1l, Hnrnpab, Pax2, Aebp2, Trim30a, Smarcc1, Cnot1, Fgf9, Hivep1, Uimc1, Arap2, Gnas, Ash2l, Rsf1, Ascc3, Xpo1, Hat1, Mak, Sigirr, Whsc1l1, Npm1, Arhgef16, Peli1, Usp16, Suds3, Hoxb9, Uchl5, …
GO:0060255	regulation of macromolecu	0.23631 ( 82 of 347 genes )	0.11073 ( 3766 of 34011 annotated genes )	2.09e-11	2.832e-08	Fzd5, Hspa5, Alkbh3, Pcbd2, Cdk13, Brd7, Zfp174, Psip1, Tceb3, Cpeb2, Sap18, Map3k5, Rptor, Atad1, Ppp2r5d, Zfp661, Csde1, Fto, Rps3, Chd4, Ebf2, Mbnl1, Hoxa13, Foxn3, Eif4g2, Ccr1, Uty, Med13, Gata1, Dock7, Eomes, Araf, Klf16, Ikzf1, Ash1l, Hnrnpab, Ppp1ca, Pax2, Aebp2, Trim30a, Casc3, Rassf1, Smarcc1, Cnot1, Fgf9, Hivep1, Uimc1, Gnas, Ash2l, Rsf1, Ascc3, Xpo1, Hat1, Mak, Whsc1l1, Sigirr, Npm1, …
GO:0071842	cellular component organi	0.19308 ( 67 of 347 genes )	0.08100 ( 2755 of 34011 annotated genes )	2.176e-11	2.948e-08	Fzd5, Ppp1r9a, Csnk1a1, St7l, 4930579C15Rik, Brd7, Znrf1, Psip1, Hsp90aa1, Tctn2, Kdm5d, Sap18, Gnai3, Ppp2r5d, Sipa1l1, Rock1, Pole4, Chd4, Endog, Lama3, Tln1, Mbnl1, Hoxa13, Gata1, Dock7, Arl8b, Ash1l, Gypa, Gpr143, Aebp2, Prpf31, Smarcc1, Anapc1, Myo1b, Wasf2, Pogz, Uimc1, Arhgap21, Eftud1, Ash2l, Celf2, Rsf1, Xpo1, Hat1, Vps18, Col4a5, Rrs1, Nme7, Whsc1l1, Npm1, Bax, Stra13, Usp16, Itgb1, Tao…
GO:0043412	macromolecule modificatio	0.17291 ( 60 of 347 genes )	0.06795 ( 2311 of 34011 annotated genes )	2.248e-11	3.046e-08	Fzd5, Hspa5, Alkbh3, Uimc1, Csnk1a1, Cdk13, Mobkl1a, Brd7, Pigc, Gnas, Ash2l, Znrf1, Rnf34, Ascc3, Kdm5d, Padi6, Map3k5, Hat1, Mak, Rptor, Cops7a, Whsc1l1, Rnf182, Npm1, Peli1, Aak1, Ppp2r5d, Ube2h, Bax, Rock1, Itgb1, Usp16, Taok1, Ppia, Fto, Pole4, Dusp11, Uchl5, Ywhab, Fkbp1a, Tcf21, Nmt2, Gata1, Slc9a3r1, Dock7, Araf, Ubr1, Mark2, Ppp1ca, Ubr5, Stk10, Lef1, Usp1, Agrn, Trim30a, Cdk19, Rassf1, …
GO:0009889	regulation of biosyntheti	0.20173 ( 70 of 347 genes )	0.08718 ( 2965 of 34011 annotated genes )	2.662e-11	3.606e-08	Fzd5, Pcbd2, Cdk13, Brd7, Zfp174, Psip1, Tceb3, Hsp90aa1, Cpeb2, Sap18, Rptor, Gnai3, Ppp2r5d, Zfp661, Csde1, Rps3, Chd4, Ebf2, Atp1a1, Hoxa13, Foxn3, Eif4g2, Uty, Med13, Gata1, Eomes, Klf16, Ikzf1, Ash1l, Hnrnpab, Ppp1ca, Pax2, Aebp2, Trim30a, Casc3, Smarcc1, Cnot1, Fgf9, Hivep1, Uimc1, Avpr1a, Gnas, Ash2l, Rsf1, Ascc3, Xpo1, Hat1, Mak, Sigirr, Whsc1l1, Npm1, Peli1, Usp16, Suds3, Hoxb9, Uchl5, Y…
GO:0019219	regulation of nucleobase,	0.20173 ( 70 of 347 genes )	0.08753 ( 2977 of 34011 annotated genes )	3.19e-11	4.322e-08	Fzd5, Pcbd2, Cdk13, Brd7, Zfp174, Psip1, Tceb3, Cpeb2, Sap18, Rptor, Gnai3, Ppp2r5d, Sipa1l1, Zfp661, Csde1, Rps3, Chd4, Ebf2, Mbnl1, Hoxa13, Foxn3, Uty, Med13, Gata1, Dock7, Eomes, Klf16, Ikzf1, Ash1l, Hnrnpab, Pax2, Aebp2, Trim30a, Smarcc1, Cnot1, Fgf9, Hivep1, Uimc1, Arap2, Gnas, Ash2l, Rsf1, Ascc3, Xpo1, Hat1, Mak, Sigirr, Whsc1l1, Npm1, Arhgef16, Peli1, Usp16, Suds3, Hoxb9, Uchl5, Ywhab, Rps…
GO:0031326	regulation of cellular bi	0.19885 ( 69 of 347 genes )	0.08609 ( 2928 of 34011 annotated genes )	4.142e-11	5.613e-08	Fzd5, Pcbd2, Cdk13, Brd7, Zfp174, Psip1, Tceb3, Hsp90aa1, Cpeb2, Sap18, Rptor, Gnai3, Ppp2r5d, Zfp661, Csde1, Rps3, Chd4, Ebf2, Atp1a1, Hoxa13, Foxn3, Eif4g2, Uty, Med13, Gata1, Eomes, Klf16, Ikzf1, Ash1l, Hnrnpab, Ppp1ca, Pax2, Aebp2, Trim30a, Casc3, Smarcc1, Cnot1, Fgf9, Hivep1, Uimc1, Avpr1a, Gnas, Ash2l, Ascc3, Rsf1, Xpo1, Hat1, Mak, Sigirr, Whsc1l1, Npm1, Peli1, Usp16, Suds3, Hoxb9, Uchl5, Y…
GO:0006996	organelle organization	0.14697 ( 51 of 347 genes )	0.05448 ( 1853 of 34011 annotated genes )	1.194e-10	1.617e-07	Ppp1r9a, Uimc1, Arhgap21, Csnk1a1, Brd7, Eftud1, Ash2l, Znrf1, Hsp90aa1, Rsf1, Kdm5d, Xpo1, Sap18, Hat1, Vps18, Rrs1, Whsc1l1, Npm1, Gnai3, Sipa1l1, Bax, Stra13, Rock1, Itgb1, Usp16, Taok1, Pole4, Chd4, Suds3, Tln1, Hoxa13, Tcf21, Gata1, Dock7, Slc9a3r1, Arl8b, Ash1l, Dock2, Fasl, Mark2, Lef1, Gypa, Gpr143, Aebp2, Smarcc1, Anapc1, Blzf1, Myo1b, Wasf2, Mll3, Pogz,
GO:0006464	protein modification proc	0.16427 ( 57 of 347 genes )	0.06563 ( 2232 of 34011 annotated genes )	1.455e-10	1.971e-07	Fzd5, Hspa5, Uimc1, Csnk1a1, Cdk13, Mobkl1a, Brd7, Pigc, Gnas, Ash2l, Znrf1, Rnf34, Kdm5d, Padi6, Map3k5, Hat1, Mak, Rptor, Cops7a, Whsc1l1, Rnf182, Npm1, Peli1, Aak1, Ppp2r5d, Ube2h, Bax, Rock1, Itgb1, Usp16, Taok1, Ppia, Pole4, Dusp11, Uchl5, Ywhab, Fkbp1a, Tcf21, Nmt2, Gata1, Slc9a3r1, Dock7, Araf, Ubr1, Mark2, Ppp1ca, Ubr5, Stk10, Lef1, Usp1, Agrn, Trim30a, Cdk19, Rassf1, Anapc1, Nlk, Mll3,
GO:0051252	regulation of RNA metabol	0.17867 ( 62 of 347 genes )	0.07533 ( 2562 of 34011 annotated genes )	1.732e-10	2.347e-07	Fzd5, Uimc1, Pcbd2, Cdk13, Brd7, Gnas, Zfp174, Ash2l, Psip1, Tceb3, Rsf1, Ascc3, Xpo1, Sap18, Hat1, Mak, Rptor, Whsc1l1, Sigirr, Npm1, Peli1, Ppp2r5d, Zfp661, Usp16, Csde1, Rps3, Chd4, Suds3, Ebf2, Uchl5, Hoxb9, Rps13, Ywhab, Mbnl1, Hoxa13, Foxn3, Tcf21, Uty, Med13, Gata1, C1d, Eomes, Klf16, Zscan5b, Ash1l, Ikzf1, Hnrnpab, Fasl, Drap1, Lef1, Pax2, Aebp2, Taf1c, Agrn, Trim30a, Ebf4, Smarcc1, Cnot1…
GO:2000112	regulation of cellular ma	0.18444 ( 64 of 347 genes )	0.07971 ( 2711 of 34011 annotated genes )	2.288e-10	3.1e-07	Fzd5, Uimc1, Pcbd2, Cdk13, Brd7, Gnas, Zfp174, Ash2l, Psip1, Tceb3, Rsf1, Ascc3, Cpeb2, Xpo1, Sap18, Hat1, Mak, Rptor, Whsc1l1, Sigirr, Npm1, Peli1, Ppp2r5d, Zfp661, Usp16, Csde1, Rps3, Chd4, Suds3, Ebf2, Uchl5, Hoxb9, Ywhab, Hoxa13, Foxn3, Eif4g2, Tcf21, Uty, Med13, Gata1, C1d, Eomes, Klf16, Zscan5b, Ash1l, Ikzf1, Hnrnpab, Fasl, Drap1, Ppp1ca, Lef1, Pax2, Aebp2, Taf1c, Agrn, Trim30a, Ebf4, Casc3…
GO:0050794	regulation of cellular pr	0.39481 ( 137 of 347 genes )	0.24345 ( 8280 of 34011 annotated genes )	2.652e-10	3.594e-07	Ppp1r9a, Csnk1a1, St7l, Brd7, Zfp174, Slc20a1, Tceb3, Hsp90aa1, 2700094K13Rik, Tctn2, Sap18, Map3k5, Mpp1, Rab2a, Mov10l1, Atad1, Sipa1l1, Rock1, Scfd1, Zfp661, Rps3, Ldlrap1, Hoxa13, Foxn3, Eif4g2, Dock7, Eomes, Araf, Klf16, Arl8b, Gpr34, Ubr5, Plcb2, Pax2, Gpr143, Smarcc1, Fgf9, Hivep1, Uimc1, Arhgap21, Neu2, Arap2, Avpr1a, Gnas, Myo9a, Hyal1, Nme7, Npm1, Arhgef16, Aak1, Bax, Usp16, Itgb1, Taok…
GO:0065007	biological regulation	0.42651 ( 148 of 347 genes )	0.27182 ( 9245 of 34011 annotated genes )	3.314e-10	4.49e-07	Ppp1r9a, Csnk1a1, St7l, Brd7, Zfp174, Slc20a1, Tceb3, Hsp90aa1, 2700094K13Rik, Tctn2, Sap18, Map3k5, Mpp1, Rab2a, Mov10l1, Atad1, Sipa1l1, Rock1, Scfd1, Zfp661, Ppia, Rps3, Tln1, Ldlrap1, Hoxa13, Foxn3, Eif4g2, Dock7, Eomes, Araf, Klf16, Arl8b, Gpr34, Ubr5, Plcb2, Gypa, Pax2, Gpr143, Smarcc1, Fgf9, Hivep1, Uimc1, Arhgap21, Neu2, Arap2, Avpr1a, Gnas, Myo9a, Hyal1, Nme7, Npm1, Arhgef16, Aak1, Bax, …
GO:0006355	regulation of transcripti	0.17291 ( 60 of 347 genes )	0.07318 ( 2489 of 34011 annotated genes )	4.198e-10	5.688e-07	Fzd5, Uimc1, Pcbd2, Cdk13, Brd7, Gnas, Zfp174, Ash2l, Psip1, Tceb3, Rsf1, Ascc3, Xpo1, Sap18, Hat1, Mak, Rptor, Whsc1l1, Sigirr, Npm1, Peli1, Ppp2r5d, Zfp661, Usp16, Csde1, Rps3, Chd4, Suds3, Ebf2, Uchl5, Hoxb9, Ywhab, Hoxa13, Foxn3, Tcf21, Uty, Med13, Gata1, C1d, Eomes, Klf16, Zscan5b, Ash1l, Ikzf1, Hnrnpab, Fasl, Drap1, Lef1, Pax2, Aebp2, Taf1c, Agrn, Trim30a, Ebf4, Smarcc1, Cnot1, Nlk, Fgf9, M…
GO:0006351	transcription, DNA-depend	0.17579 ( 61 of 347 genes )	0.07530 ( 2561 of 34011 annotated genes )	4.661e-10	6.315e-07	Fzd5, Uimc1, Pcbd2, Cdk13, Brd7, Gnas, Zfp174, Ash2l, Psip1, Tceb3, Rsf1, Ascc3, Xpo1, Sap18, Hat1, Mak, Rptor, Whsc1l1, Sigirr, Npm1, Peli1, Ppp2r5d, Zfp661, Usp16, Csde1, Rps3, Chd4, Suds3, Ebf2, Uchl5, Hoxb9, Ywhab, Hoxa13, Foxn3, Tcf21, Uty, Med13, Gata1, C1d, Eomes, Klf16, Zscan5b, Ash1l, Ikzf1, Hnrnpab, Fasl, Drap1, Lef1, Pax2, Aebp2, Taf1c, Agrn, Trim30a, Ebf4, Smarcc1, Cnot1, Nlk, Grinl1a…
GO:0032774	RNA biosynthetic process	0.17579 ( 61 of 347 genes )	0.07550 ( 2568 of 34011 annotated genes )	5.183e-10	7.023e-07	Fzd5, Uimc1, Pcbd2, Cdk13, Brd7, Gnas, Zfp174, Ash2l, Psip1, Tceb3, Rsf1, Ascc3, Xpo1, Sap18, Hat1, Mak, Rptor, Whsc1l1, Sigirr, Npm1, Peli1, Ppp2r5d, Zfp661, Usp16, Csde1, Rps3, Chd4, Suds3, Ebf2, Uchl5, Hoxb9, Ywhab, Hoxa13, Foxn3, Tcf21, Uty, Med13, Gata1, C1d, Eomes, Klf16, Zscan5b, Ash1l, Ikzf1, Hnrnpab, Fasl, Drap1, Lef1, Pax2, Aebp2, Taf1c, Agrn, Trim30a, Ebf4, Smarcc1, Cnot1, Nlk, Grinl1a…
GO:0010556	regulation of macromolecu	0.18444 ( 64 of 347 genes )	0.08174 ( 2780 of 34011 annotated genes )	6.321e-10	8.565e-07	Fzd5, Uimc1, Pcbd2, Cdk13, Brd7, Gnas, Zfp174, Ash2l, Psip1, Tceb3, Rsf1, Ascc3, Cpeb2, Xpo1, Sap18, Hat1, Mak, Rptor, Whsc1l1, Sigirr, Npm1, Peli1, Ppp2r5d, Zfp661, Usp16, Csde1, Rps3, Chd4, Suds3, Ebf2, Uchl5, Hoxb9, Ywhab, Hoxa13, Foxn3, Eif4g2, Tcf21, Uty, Med13, Gata1, C1d, Eomes, Klf16, Zscan5b, Ash1l, Ikzf1, Hnrnpab, Fasl, Drap1, Ppp1ca, Lef1, Pax2, Aebp2, Taf1c, Agrn, Trim30a, Ebf4, Casc3…
GO:0050789	regulation of biological	0.40922 ( 142 of 347 genes )	0.25965 ( 8831 of 34011 annotated genes )	7.658e-10	1.038e-06	Ppp1r9a, Csnk1a1, St7l, Brd7, Zfp174, Slc20a1, Tceb3, Hsp90aa1, 2700094K13Rik, Tctn2, Sap18, Map3k5, Mpp1, Rab2a, Mov10l1, Atad1, Sipa1l1, Rock1, Scfd1, Zfp661, Ppia, Rps3, Ldlrap1, Hoxa13, Foxn3, Eif4g2, Dock7, Eomes, Araf, Klf16, Arl8b, Gpr34, Ubr5, Plcb2, Gypa, Pax2, Gpr143, Smarcc1, Fgf9, Hivep1, Uimc1, Arhgap21, Neu2, Arap2, Avpr1a, Gnas, Myo9a, Hyal1, Nme7, Npm1, Arhgef16, Aak1, Bax, Usp16,…
GO:0006325	chromatin organization	0.05764 ( 20 of 347 genes )	0.01350 ( 459 of 34011 annotated genes )	7.008e-08	9.496e-05	Chd4, Uimc1, Suds3, Brd7, Tcf21, Ash2l, Gata1, Rsf1, Kdm5d, Ash1l, Sap18, Hat1, Lef1, Whsc1l1, Npm1, Aebp2, Smarcc1, Usp16, Mll3, Pole4,
GO:0048522	positive regulation of ce	0.17291 ( 60 of 347 genes )	0.08441 ( 2871 of 34011 annotated genes )	7.981e-08	0.0001081	Fzd5, Hspa5, Uimc1, Pcbd2, Mobkl1a, Neu2, Ngfrap1, Brd7, Avpr1a, Gnas, Ash2l, Psip1, Slc20a1, Hsp90aa1, Rsf1, Casp14, Map3k5, Rptor, Hyal1, Npm1, Atad1, Peli1, Arhgef16, Aak1, Ppp2r5d, Bax, Itgb1, Usp16, Taok1, Rps3, Ap3d1, Ebf2, Endog, Hoxb9, Ldlrap1, Hoxa13, Fkbp1a, Tcf21, Ccr1, Utrn, Med13, Gata1, Dock7, Araf, Eomes, Sav1, Ikzf1, Dock2, Hnrnpab, Fasl, Mark2, Ubr5, Fdps, Lef1, Pax2, Agrn, Rassf…
GO:0048518	positive regulation of bi	0.18444 ( 64 of 347 genes )	0.09382 ( 3191 of 34011 annotated genes )	1.214e-07	0.0001645	Fzd5, Hspa5, Uimc1, Pcbd2, Mobkl1a, Neu2, Ngfrap1, Brd7, Avpr1a, Gnas, Ash2l, Psip1, Slc20a1, Hsp90aa1, Rsf1, Casp14, Map3k5, Rptor, Klhl6, Hyal1, Npm1, Atad1, Peli1, Arhgef16, Aak1, Ppp2r5d, Bax, Itgb1, Usp16, Taok1, Rps3, Ap3d1, Ebf2, Endog, Atp1a1, Hoxb9, Ldlrap1, Hoxa13, Fkbp1a, Tcf21, Ccr1, Utrn, Med13, Gata1, Dock7, Eomes, Araf, Sav1, Ikzf1, Dock2, Hnrnpab, Fasl, Mark2, Ubr5, Fdps, Tmem30b,…
GO:0016568	chromatin modification	0.05187 ( 18 of 347 genes )	0.01182 ( 402 of 34011 annotated genes )	2.139e-07	0.0002898	Chd4, Uimc1, Suds3, Brd7, Tcf21, Ash2l, Rsf1, Kdm5d, Ash1l, Sap18, Hat1, Lef1, Whsc1l1, Aebp2, Smarcc1, Usp16, Mll3, Pole4,
GO:0022613	ribonucleoprotein complex	0.03746 ( 13 of 347 genes )	0.00609 ( 207 of 34011 annotated genes )	2.462e-07	0.0003337	Rrs1, Rpf1, Mbnl1, Npm1, Prpf31, Eftud1, Rps28, Psip1, C1d, Celf2, Rpl14, Exosc8, Rplp0,
GO:0051179	localization	0.21037 ( 73 of 347 genes )	0.11543 ( 3926 of 34011 annotated genes )	2.597e-07	0.000352	4930579C15Rik, G3bp2, Acbd5, Slc22a18, Slc20a1, Hsp90aa1, Ap1s2, Atp6v0e, Mpp1, Rab2a, Atad1, Gnai3, Exoc5, Rock1, Scfd1, Slco4a1, Hspa9, Fto, Nup160, Atp1a1, Mitd1, Tln1, Ldlrap1, Ccr1, Uty, Rps28, Ubr5, Gypa, Gpr143, Slc25a46, Casc3, Derl2, Wasf2, Fgf9, Ap1g2, Fnbp1, Cadm3, Arhgap21, Cyct, Avpr1a, Gnas, Vps13c, Xpo1, Vps18, Rrs1, Hyal1, Nme7, Npm1, Atp5o, Chrna2, Aak1, Arhgef16, Bax, Vps13a, It…
GO:0051276	chromosome organization	0.06340 ( 22 of 347 genes )	0.01764 ( 600 of 34011 annotated genes )	3.07e-07	0.0004159	Chd4, Uimc1, Suds3, Brd7, Tcf21, Ash2l, Gata1, Rsf1, Kdm5d, Ash1l, Sap18, Hat1, Lef1, Rrs1, Whsc1l1, Npm1, Aebp2, Smarcc1, Usp16, Mll3, Pogz, Pole4,
GO:0051641	cellular localization	0.10951 ( 38 of 347 genes )	0.04510 ( 1534 of 34011 annotated genes )	4.929e-07	0.0006679	Arhgap21, 4930579C15Rik, Avpr1a, Hsp90aa1, Ap1s2, Xpo1, Vps18, Rrs1, Rab2a, Nme7, Npm1, Atp5o, Arhgef16, Exoc5, Bax, Scfd1, Hspa9, Itgb1, Ap3d1, Yipf5, Nup160, Tln1, Ldlrap1, Ywhab, Ccr1, Rps28, Slc9a3r1, Dock2, Ubr5, Tmem30b, Gypa, Gpr143, Casc3, Blzf1, Grinl1a, Derl2, Fgf9, Ap1g2,
GO:0071843	cellular component biogen	0.03746 ( 13 of 347 genes )	0.00647 ( 220 of 34011 annotated genes )	4.941e-07	0.0006695	Rrs1, Rpf1, Mbnl1, Npm1, Prpf31, Eftud1, Rps28, Psip1, C1d, Celf2, Rpl14, Exosc8, Rplp0,
