# Supplementary material for: The Y chromosome as a regulatory element shaping immune cell transcriptomes and susceptibility to autoimmune disease
Source: HighWire-hosted journal article supplement (doi:10.1101/gr.156703.113), 2013-06-25
Supplement: Supplemental_Tables.zip [file Table S7_SJLMacAltSplice_GOTerms.xlsx]

## Sheet: YmusvsSJLMacAltSpliceFDR0.05Uni
Table S7. GO term analysis on macrophage alternatively spliced transcripts (FDR<0.05) from SJL-ChrYB10.S vs. SJL dataset. Terms with P<1.0E-3 are shown.
GOID	GO_term	Frequency	Genome frequency	P-value	Corrected P-value	Gene(s) Directly Annotated GOID list
GO:0009987	cellular process	0.60337 ( 1395 of 2312 genes )	0.39346 (13382 of 34011 annotated genes )	2.363e-106	8.3e-103	Terf2ip, Bdp1, Arhgap11a, Map2k3, Brd7, Gria4, Tctn3, Slc22a1, Dnmt3a, Unc45a, Slc12a1, Zp3r, Atp1a4, Cd99l2, Atf7ip, Ppp1r1a, Abcc12, Plekha7, Adrbk1, Exoc5, Ush1c, Usp42, Pdilt, Flna, Anxa1, Sulf2, Pex14, Copb1, Adssl1, Asb9, Dixdc1, Ocln, Fnip1, Gpr82, Ssh3, Ap2b1, Arap3, Fgfr1, 6430573F11Rik, Tbck, Araf, 4933424B01Rik, Hyal2, Tcfcp2l1, Gas2l1, Smg1, Bhlha15, Cacnb3, Rbbp8, Airn, Rbck1, Cybasc…
GO:0008152	metabolic process	0.45329 ( 1048 of 2312 genes )	0.26565 ( 9035 of 34011 annotated genes )	2.522e-95	8.861e-92	Terf2ip, Bdp1, Map2k3, Brd7, Dnmt3a, Unc45a, Atp1a4, Atf7ip, Ppp1r1a, 9630033F20Rik, Adrbk1, Usp42, Flna, Anxa1, Sulf2, Pex14, Adssl1, Asb9, Ocln, Capn13, Fnip1, Ssh3, Arap3, Fgfr1, 6430573F11Rik, Tbck, Araf, Glb1l3, Hyal2, Tcfcp2l1, Gas2l1, Smg1, Bhlha15, Rbbp8, Airn, Rbck1, Pld5, Cybasc3, Hmgn3, Il12a, Dmrt1, Cd74, Chst2, Gchfr, Gdpd4, Traf2, Clgn, Sox5, Shmt1, Sbk1, Orc3, Rab21, Ilk, Scyl2, Sy…
GO:0044238	primary metabolic process	0.39792 ( 920 of 2312 genes )	0.22525 ( 7661 of 34011 annotated genes )	6.427e-88	2.258e-84	Terf2ip, Apbb1, Bdp1, Erbb3, Aff3, Map2k3, Brd7, Disc1, Zzz3, Trpm6, Dnmt3a, Unc45a, Atp1a4, Atf7ip, Ppp1r1a, Slc27a5, Usp24, Adrbk1, Snrpa, Usp42, Dnase1l2, Flna, Anxa1, Pex14, Adssl1, Asb9, Ocln, Capn13, Fnip1, Ssh3, Arap3, Fgfr1, Lars, Nlrc5, Rps28, Ppp1cb, Tbck, Araf, Tdrd9, Enpep, Glb1l3, Hyal2, Tgfbr1, Dido1, Tcfcp2l1, Ubr5, Smg1, Bhlha15, Rbbp8, Airn, Rbck1, Ahsa1, Itgb3, Ptpru, Serpinb12,…
GO:0044237	cellular metabolic proces	0.39273 ( 908 of 2312 genes )	0.22384 ( 7613 of 34011 annotated genes )	1.078e-84	3.788e-81	Terf2ip, Apbb1, Bdp1, Erbb3, Aff3, Map2k3, Brd7, Disc1, Zzz3, Trpm6, Dnmt3a, Unc45a, Atp1a4, Atf7ip, Ppp1r1a, Slc27a5, Usp24, Adrbk1, Snrpa, Usp42, Dnase1l2, Flna, Anxa1, Sulf2, Pex14, Adssl1, Asb9, Duox1, Ocln, Fnip1, Ssh3, Arap3, Fgfr1, Lars, Nlrc5, 6430573F11Rik, Rps28, Ppp1cb, Tbck, Araf, Tdrd9, Enpep, Hyal2, Tgfbr1, Dido1, Tcfcp2l1, Ubr5, Akap14, Smg1, Bhlha15, Rbbp8, Airn, Rbck1, Cybasc3, A…
GO:0043170	macromolecule metabolic p	0.33175 ( 767 of 2312 genes )	0.18900 ( 6428 of 34011 annotated genes )	4.791e-68	1.683e-64	Terf2ip, Apbb1, Bdp1, Erbb3, Aff3, Map2k3, Brd7, Disc1, Zzz3, Trpm6, Dnmt3a, Unc45a, Atf7ip, Ppp1r1a, Usp24, Adrbk1, Snrpa, Usp42, Dnase1l2, Flna, Anxa1, Sulf2, Pex14, Asb9, Capn13, Fnip1, Ssh3, Fgfr1, Lars, Nlrc5, Rps28, Ppp1cb, Araf, Tdrd9, Enpep, Hyal2, Tgfbr1, Dido1, Tcfcp2l1, Ubr5, Gas2l1, Smg1, Bhlha15, Rbbp8, Airn, Rbck1, Itgb3, Ptpru, Serpinb12, Hmgn3, Smarcc1, Ttll10, Il12a, Ccdc88c, Nub…
GO:0044260	cellular macromolecule me	0.29888 ( 691 of 2312 genes )	0.16512 ( 5616 of 34011 annotated genes )	3.167e-65	1.113e-61	Terf2ip, Apbb1, Bdp1, Erbb3, Aff3, Map2k3, Brd7, Disc1, Zzz3, Trpm6, Dnmt3a, Unc45a, Atf7ip, Ppp1r1a, Usp24, Adrbk1, Snrpa, Usp42, Dnase1l2, Flna, Anxa1, Sulf2, Pex14, Asb9, Fnip1, Ssh3, Fgfr1, Lars, Nlrc5, Rps28, Ppp1cb, Araf, Tdrd9, Hyal2, Tgfbr1, Dido1, Tcfcp2l1, Ubr5, Smg1, Bhlha15, Rbbp8, Rbck1, Itgb3, Ptpru, Hmgn3, Smarcc1, Ttll10, Il12a, Ccdc88c, Nub1, Dmrt1, Cd74, Traf2, Cdc42bpa, Clgn, G…
GO:0071840	cellular component organi	0.21237 ( 491 of 2312 genes )	0.10864 ( 3695 of 34011 annotated genes )	1.455e-53	5.11e-50	Terf2ip, Apbb1, Cenpt, Pparg, Prkcb, Abi3bp, Boc, Brd7, Cald1, Disc1, Birc6, Tctn3, Cntrob, Mta1, Gnb2l1, Tro, Tnks2, Dnmt3a, Atf7ip, Plekha7, Adrbk1, Ush1c, Scara5, Sun2, Flna, Anxa1, Sulf2, Sgol1, Pex14, Pim3, Dixdc1, Arhgap42, Nbr1, Ocln, Ssh3, Ap2b1, Fgfr1, Atp7a, Lect1, Slit2, Coro2a, Rps28, 4933424B01Rik, Hyal2, Tgfbr1, Tcfcp2l1, Evl, Myo6, Pdss1, Gas2l1, Lsm14a, Bhlha15, Rbbp8, Ptprz1, Apl…
GO:0016043	cellular component organi	0.20545 ( 475 of 2312 genes )	0.10476 ( 3563 of 34011 annotated genes )	4.908e-52	1.724e-48	Terf2ip, Apbb1, Cenpt, Pparg, Prkcb, Abi3bp, Boc, Brd7, Cald1, Disc1, Birc6, Tctn3, Cntrob, Mta1, Gnb2l1, Tro, Tnks2, Dnmt3a, Atf7ip, Plekha7, Adrbk1, Ush1c, Scara5, Sun2, Flna, Anxa1, Sulf2, Sgol1, Pex14, Pim3, Dixdc1, Arhgap42, Nbr1, Ocln, Ssh3, Ap2b1, Fgfr1, Atp7a, Lect1, Slit2, Coro2a, 4933424B01Rik, Hyal2, Tgfbr1, Tcfcp2l1, Evl, Myo6, Pdss1, Gas2l1, Lsm14a, Bhlha15, Rbbp8, Ptprz1, Aplp2, Ccl…
GO:0051179	localization	0.21843 ( 505 of 2312 genes )	0.11543 ( 3926 of 34011 annotated genes )	6.347e-51	2.23e-47	Terf2ip, Apbb1, Slc39a14, Erbb3, Pparg, Prkcb, Gria4, Disc1, Gnb2l1, Krit1, Ciz1, Slc22a1, Trpm6, Tnks2, Slc12a1, Nup214, Atp1a4, Scn9a, Xbp1, Abcc12, Slc27a5, Fgf21, Adrbk1, Exoc5, Scara5, Sun2, Flna, Anxa1, Sgol1, Pex14, Copb1, Mcoln3, Pim3, Dixdc1, Nup160, Slc45a1, Exoc3, Gna13, Ap2b1, Arap3, Fgfr1, Scfd2, Atp7a, Sdccag1, Slit2, Csn1s1, Rps28, Trim36, Enpep, Hyal2, Slc4a8, Tgfbr1, Slc6a14, Snx…
GO:0065007	biological regulation	0.40398 ( 934 of 2312 genes )	0.27182 ( 9245 of 34011 annotated genes )	8.295e-50	2.914e-46	Terf2ip, Apbb1, Bdp1, Erbb3, Aff3, Arhgap11a, Map2k3, Brd7, Cald1, Olfr613, Gria4, Disc1, Olfr459, Zzz3, Slc22a1, Tro, Dnmt3a, 2700094K13Rik, Slc12a1, Myl3, Atp1a4, Olfr1298, Atf7ip, Ppp1r1a, Olfr281, Fgf21, Adrbk1, Pdilt, Flna, Anxa1, Sulf2, Pex14, Asb9, Dixdc1, Duox1, Fnip1, Gpr82, Ssh3, Ap2b1, Arap3, Fgfr1, Gpr153, Nlrc5, Ppp1cb, Tbck, Araf, Tdrd9, Enpep, Hyal2, Tgfbr1, Tcfcp2l1, Ubr5, Gas2l1,…
GO:0071841	cellular component organi	0.17215 ( 398 of 2312 genes )	0.08456 ( 2876 of 34011 annotated genes )	6.996e-47	2.458e-43	Terf2ip, Apbb1, Cenpt, Prkcb, Abi3bp, Boc, Brd7, Cald1, Disc1, Birc6, Tctn3, Cntrob, Mta1, Tnks2, Dnmt3a, Atf7ip, Plekha7, Ush1c, Sun2, Flna, Anxa1, Sulf2, Sgol1, Pex14, Pim3, Dixdc1, Arhgap42, Ssh3, Ap2b1, Fgfr1, Atp7a, Slit2, Coro2a, Rps28, 4933424B01Rik, Tgfbr1, Tcfcp2l1, Evl, Myo6, Gas2l1, Lsm14a, Bhlha15, Rbbp8, Ptprz1, Aplp2, Ccl5, Itgb3, Diap2, Hmgn3, Gnl2, Cdh23, Smarcc1, Incenp, Ccdc88c,…
GO:0019538	protein metabolic process	0.19507 ( 451 of 2312 genes )	0.10229 ( 3479 of 34011 annotated genes )	8.163e-46	2.868e-42	Apbb1, Erbb3, Prkcb, Map2k3, Brd7, Disc1, Birc6, Fam129a, Eif2b4, Gnb2l1, Trpm6, Tnks2, Unc45a, Eif4e, Dbf4, Aco1, Prkg2, Usp24, Adrbk1, Usp42, Pik3ca, Flna, Anxa1, Mrpl4, Pim3, Asb9, Rps3, Capn13, Fnip1, Maged1, Dnaja2, Ssh3, Rps6kc1, Fgfr1, Atp7a, Eif4g2, Lars, Slit2, Rps28, Dnajc27, Ppp1cb, Araf, Tcp1, Enpep, Hyal2, Tgfbr1, Ubr5, Mark3, Smg1, Lsm14a, Ccny, Pde6h, Srms, Rbck1, 1810031K17Rik, Ap…
GO:0071842	cellular component organi	0.16566 ( 383 of 2312 genes )	0.08100 ( 2755 of 34011 annotated genes )	1.823e-45	6.405e-42	Terf2ip, Apbb1, Cenpt, Prkcb, Abi3bp, Boc, Brd7, Cald1, Disc1, Birc6, Tctn3, Cntrob, Mta1, Tnks2, Dnmt3a, Atf7ip, Plekha7, Ush1c, Sun2, Flna, Anxa1, Sulf2, Sgol1, Pex14, Pim3, Dixdc1, Arhgap42, Ssh3, Ap2b1, Fgfr1, Atp7a, Slit2, Coro2a, 4933424B01Rik, Tgfbr1, Tcfcp2l1, Evl, Myo6, Gas2l1, Lsm14a, Bhlha15, Rbbp8, Ptprz1, Aplp2, Ccl5, Itgb3, Diap2, Hmgn3, Cdh23, Smarcc1, Incenp, Ccdc88c, Dmrt1, Lama2…
GO:0006139	nucleobase, nucleoside, n	0.22232 ( 514 of 2312 genes )	0.12602 ( 4286 of 34011 annotated genes )	7.157e-43	2.514e-39	Terf2ip, Apbb1, Bdp1, Aff3, Map2k3, Brd7, Zzz3, Dnmt3a, Atp1a4, Atf7ip, Snrpa, Dnase1l2, Flna, Pex14, Adssl1, Ocln, Arap3, Fgfr1, Lars, Nlrc5, Rps28, Tbck, Tdrd9, Hyal2, Tgfbr1, Dido1, Tcfcp2l1, Smg1, Bhlha15, Rbbp8, Airn, Rbck1, Ahsa1, Hmgn3, Gnl2, Smarcc1, Dmrt1, Traf2, Arfgap1, Gsk3b, Inhba, Sox5, Eid1, Cdc73, Shmt1, Rpain, Orc3, Rab21, Ilk, Etf1, Hdac4, Ptgir, Rad21, Brwd1, Arhgef7, Xab2, Prk…
GO:0019222	regulation of metabolic p	0.23097 ( 534 of 2312 genes )	0.13337 ( 4536 of 34011 annotated genes )	2.193e-42	7.703e-39	Terf2ip, Apbb1, Bdp1, Erbb3, Aff3, Map2k3, Brd7, Disc1, Zzz3, Dnmt3a, Atf7ip, Ppp1r1a, Flna, Anxa1, Pex14, Asb9, Fnip1, Arap3, Fgfr1, Nlrc5, Ppp1cb, Tbck, Araf, Tdrd9, Hyal2, Tgfbr1, Tcfcp2l1, Gas2l1, Bhlha15, Rbbp8, Airn, Rbck1, Ahsa1, Itgb3, Serpinb12, Hmgn3, Smarcc1, Dock10, Il12a, Ccdc88c, Nub1, Dmrt1, Cd74, Gchfr, Traf2, Arfgap1, Gsk3b, Inhba, Sox5, Eid1, Cdc73, Faf1, Ilk, Scyl2, Sytl2, Hdac…
GO:0044267	cellular protein metaboli	0.16739 ( 387 of 2312 genes )	0.08527 ( 2900 of 34011 annotated genes )	1.006e-41	3.533e-38	Apbb1, Erbb3, Prkcb, Map2k3, Brd7, Disc1, Birc6, Fam129a, Eif2b4, Gnb2l1, Trpm6, Tnks2, Unc45a, Eif4e, Dbf4, Aco1, Prkg2, Usp24, Adrbk1, Usp42, Pik3ca, Anxa1, Mrpl4, Pim3, Asb9, Rps3, Fnip1, Maged1, Dnaja2, Ssh3, Rps6kc1, Fgfr1, Atp7a, Eif4g2, Lars, Slit2, Rps28, Dnajc27, Ppp1cb, Araf, Tcp1, Hyal2, Tgfbr1, Ubr5, Mark3, Smg1, Lsm14a, Ccny, Pde6h, Srms, Rbck1, 1810031K17Rik, Aplp2, Eif3j, Ccl5, Itg…
GO:0051234	establishment of localiza	0.17993 ( 416 of 2312 genes )	0.09470 ( 3221 of 34011 annotated genes )	1.499e-41	5.266e-38	Apbb1, Slc39a14, Erbb3, Pparg, Prkcb, Gria4, Gnb2l1, Slc22a1, Trpm6, Slc12a1, Nup214, Atp1a4, Scn9a, Xbp1, Abcc12, Slc27a5, Fgf21, Adrbk1, Exoc5, Scara5, Sun2, Flna, Anxa1, Pex14, Copb1, Mcoln3, Pim3, Nup160, Slc45a1, Exoc3, Ap2b1, Scfd2, Atp7a, Sdccag1, Csn1s1, Rps28, Trim36, Hyal2, Slc4a8, Tgfbr1, Slc6a14, Snx7, Ubr5, Slc35b3, Nup93, Myo6, Bhlha15, Cacnb3, Nup107, Rbck1, Cybasc3, Ccl5, Itgb3, R…
GO:0050789	regulation of biological	0.37760 ( 873 of 2312 genes )	0.25965 ( 8831 of 34011 annotated genes )	2.137e-41	7.507e-38	Terf2ip, Apbb1, Bdp1, Erbb3, Aff3, Arhgap11a, Map2k3, Brd7, Cald1, Olfr613, Gria4, Disc1, Olfr459, Zzz3, Tro, Dnmt3a, 2700094K13Rik, Myl3, Olfr1298, Atf7ip, Ppp1r1a, Olfr281, Fgf21, Adrbk1, Pdilt, Flna, Anxa1, Sulf2, Pex14, Asb9, Dixdc1, Duox1, Fnip1, Gpr82, Ssh3, Arap3, Fgfr1, Gpr153, Nlrc5, Ppp1cb, Tbck, Araf, Tdrd9, Hyal2, Tgfbr1, Tcfcp2l1, Ubr5, Gas2l1, Bhlha15, Cacnb3, Rbbp8, Airn, Rbck1, Ah…
GO:0032502	developmental process	0.20891 ( 483 of 2312 genes )	0.11705 ( 3981 of 34011 annotated genes )	2.427e-41	8.528e-38	Megf11, Apbb1, Erbb3, Pparg, Prkcb, Aff3, Boc, Disc1, Birc6, Tctn3, Eif2b4, Gnb2l1, Krit1, Dnmt3a, Unc45a, Slc12a1, Trp53bp2, Aco1, Myl3, Scn9a, Lgals8, Xbp1, Cntn3, Adrbk1, Ush1c, Usp42, Pdilt, Pik3ca, Flna, Anxa1, Sulf2, Mcoln3, Dixdc1, Duox1, Nbr1, Maged1, Gna13, Ssh3, Fgfr1, Mef2d, Atp7a, Lect1, Slit2, Tdrd9, Enpep, Adap2, Tgfbr1, Tcfcp2l1, Evl, Myo6, Gas2l1, Lsm14a, Bhlha15, Rbbp8, Ptprz1, A…
GO:0006810	transport	0.17604 ( 407 of 2312 genes )	0.09306 ( 3165 of 34011 annotated genes )	3.952e-40	1.388e-36	Apbb1, Slc39a14, Erbb3, Pparg, Prkcb, Gria4, Gnb2l1, Slc22a1, Trpm6, Slc12a1, Nup214, Atp1a4, Scn9a, Xbp1, Abcc12, Slc27a5, Fgf21, Adrbk1, Exoc5, Scara5, Flna, Anxa1, Pex14, Copb1, Mcoln3, Pim3, Nup160, Slc45a1, Exoc3, Ap2b1, Scfd2, Atp7a, Sdccag1, Csn1s1, Rps28, Trim36, Hyal2, Slc4a8, Tgfbr1, Slc6a14, Snx7, Ubr5, Slc35b3, Nup93, Myo6, Bhlha15, Cacnb3, Nup107, Rbck1, Cybasc3, Ccl5, Itgb3, Rab33a,…
GO:0007275	multicellular organismal	0.19118 ( 442 of 2312 genes )	0.10479 ( 3564 of 34011 annotated genes )	7.428e-40	2.609e-36	Megf11, Apbb1, Erbb3, Pparg, Prkcb, Aff3, Boc, Disc1, Birc6, Eif2b4, Gnb2l1, Krit1, Dnmt3a, Unc45a, Slc12a1, Trp53bp2, Aco1, Myl3, Scn9a, Lgals8, Xbp1, Cntn3, Adrbk1, Ush1c, Pdilt, Pik3ca, Flna, Anxa1, Sulf2, Mcoln3, Dixdc1, Duox1, Nbr1, Maged1, Gna13, Ssh3, Fgfr1, Mef2d, Atp7a, Lect1, Slit2, Tdrd9, Enpep, Adap2, Tgfbr1, Tcfcp2l1, Evl, Myo6, Gas2l1, Lsm14a, Rbbp8, Ptprz1, Aplp2, Ccl5, Itgb3, Olfm…
GO:0034641	cellular nitrogen compoun	0.23097 ( 534 of 2312 genes )	0.13631 ( 4636 of 34011 annotated genes )	1.201e-39	4.218e-36	Terf2ip, Apbb1, Bdp1, Aff3, Map2k3, Brd7, Zzz3, Dnmt3a, Atp1a4, Atf7ip, Snrpa, Dnase1l2, Flna, Pex14, Adssl1, Ocln, Arap3, Fgfr1, Lars, Nlrc5, Rps28, Tbck, Tdrd9, Hyal2, Tgfbr1, Dido1, Tcfcp2l1, Smg1, Bhlha15, Rbbp8, Airn, Rbck1, Ahsa1, Hmgn3, Gnl2, Smarcc1, Dmrt1, Traf2, Arfgap1, Gsk3b, Inhba, Sox5, Eid1, Cdc73, Shmt1, Rpain, Orc3, Rab21, Ilk, Etf1, Hdac4, Ptgir, Rad21, Brwd1, Arhgef7, Xab2, Prk…
GO:0006807	nitrogen compound metabol	0.23356 ( 540 of 2312 genes )	0.13916 ( 4733 of 34011 annotated genes )	5.755e-39	2.022e-35	Terf2ip, Apbb1, Bdp1, Aff3, Map2k3, Brd7, Zzz3, Dnmt3a, Atp1a4, Atf7ip, Snrpa, Dnase1l2, Flna, Pex14, Adssl1, Ocln, Arap3, Fgfr1, Lars, Nlrc5, Rps28, Tbck, Tdrd9, Hyal2, Tgfbr1, Dido1, Tcfcp2l1, Smg1, Bhlha15, Rbbp8, Airn, Rbck1, Ahsa1, Hmgn3, Gnl2, Smarcc1, Dmrt1, Traf2, Arfgap1, Gsk3b, Inhba, Sox5, Eid1, Cdc73, Shmt1, Rpain, Orc3, Rab21, Ilk, Etf1, Hdac4, Ptgir, Rad21, Brwd1, Arhgef7, Xab2, Prk…
GO:0031323	regulation of cellular me	0.20199 ( 467 of 2312 genes )	0.11417 ( 3883 of 34011 annotated genes )	7.76e-39	2.726e-35	Terf2ip, Apbb1, Bdp1, Erbb3, Pparg, Prkcb, Aff3, Map2k3, Brd7, Disc1, Fam129a, Eif2b4, Zzz3, Mta1, Gnb2l1, Ciz1, Med8, Dnmt3a, Eif4e, Aco1, Atf7ip, Xbp1, Trps1, Pik3ca, Flna, Anxa1, Pex14, Rps3, Fnip1, Maged1, Gna13, Arap3, Fgfr1, Mef2d, Atp7a, Eif4g2, Slit2, Arhgap1, Nlrc5, Ppp1cb, Tbck, Araf, Adap2, Ccar1, Hyal2, Tgfbr1, Tcfcp2l1, Rbm10, Myo6, Lsm14a, Bhlha15, Ccny, Rbbp8, Pde6h, Rbck1, 1810031…
GO:0050794	regulation of cellular pr	0.35424 ( 819 of 2312 genes )	0.24345 ( 8280 of 34011 annotated genes )	4.151e-38	1.458e-34	Terf2ip, Apbb1, Bdp1, Erbb3, Aff3, Arhgap11a, Map2k3, Brd7, Olfr613, Gria4, Disc1, Olfr459, Zzz3, Tro, Dnmt3a, 2700094K13Rik, Olfr1298, Atf7ip, Ppp1r1a, Olfr281, Fgf21, Adrbk1, Pdilt, Flna, Anxa1, Sulf2, Pex14, Asb9, Dixdc1, Duox1, Fnip1, Gpr82, Ssh3, Arap3, Fgfr1, Gpr153, Nlrc5, Ppp1cb, Tbck, Araf, Hyal2, Tgfbr1, Tcfcp2l1, Ubr5, Gas2l1, Bhlha15, Cacnb3, Rbbp8, Rbck1, Ahsa1, Itgb3, Ptpru, Emr1, H…
GO:0080090	regulation of primary met	0.19680 ( 455 of 2312 genes )	0.11152 ( 3793 of 34011 annotated genes )	1.858e-37	6.528e-34	Terf2ip, Apbb1, Bdp1, Erbb3, Pparg, Prkcb, Aff3, Map2k3, Brd7, Disc1, Fam129a, Eif2b4, Zzz3, Mta1, Gnb2l1, Ciz1, Med8, Dnmt3a, Eif4e, Aco1, Atf7ip, Xbp1, Trps1, Pik3ca, Flna, Anxa1, Pex14, Asb9, Rps3, Fnip1, Maged1, Gna13, Arap3, Fgfr1, Mef2d, Eif4g2, Slit2, Arhgap1, Nlrc5, Ppp1cb, Tbck, Araf, Adap2, Ccar1, Hyal2, Tgfbr1, Tcfcp2l1, Rbm10, Myo6, Lsm14a, Bhlha15, Ccny, Rbbp8, Pde6h, Rbck1, 1810031K…
GO:0043412	macromolecule modificatio	0.13668 ( 316 of 2312 genes )	0.06795 ( 2311 of 34011 annotated genes )	1.002e-35	3.52e-32	Apbb1, Erbb3, Prkcb, Map2k3, Brd7, Disc1, Birc6, Fam129a, Gnb2l1, Trpm6, Tnks2, Dnmt3a, Dbf4, Prkg2, Atf7ip, Adrbk1, Usp42, Pik3ca, Anxa1, Pim3, Asb9, Fnip1, Maged1, Ssh3, Rps6kc1, Fgfr1, Atp7a, Slit2, Ppp1cb, Araf, Tdrd9, Hyal2, Tgfbr1, Ubr5, Mark3, Smg1, Ccny, Pde6h, Srms, Rbck1, 1810031K17Rik, Aplp2, Ccl5, Itgb3, Ptpru, Ttll10, Il12a, Ccdc88c, Nub1, Fbxw11, Cd74, Cdk15, Map4k4, Traf2, Ptprb, C…
GO:0009058	biosynthetic process	0.21021 ( 486 of 2312 genes )	0.12543 ( 4266 of 34011 annotated genes )	1.924e-34	6.76e-31	Terf2ip, Apbb1, Bdp1, Pparg, Prkcb, Aff3, Map2k3, Brd7, Fam129a, Eif2b4, Zzz3, Mta1, Gnb2l1, Ciz1, Med8, Dnmt3a, Eif4e, Dbf4, Aco1, Atp1a4, Atf7ip, Xbp1, Slc27a5, Trps1, Flna, Anxa1, Mrpl4, Pex14, Adssl1, Rps3, Maged1, Gna13, Fgfr1, Mef2d, Atp7a, Eif4g2, Lars, Nlrc5, Rps28, Ppp1cb, Ccar1, Hyal2, Tgfbr1, Dido1, Tcfcp2l1, Rbm10, Chtf18, Myo6, Pdss1, Lsm14a, Bhlha15, Rbbp8, Rbck1, Zmym2, Eif3j, Ccl5…
GO:0006464	protein modification proc	0.13106 ( 303 of 2312 genes )	0.06563 ( 2232 of 34011 annotated genes )	1.254e-33	4.405e-30	Apbb1, Erbb3, Prkcb, Map2k3, Brd7, Disc1, Birc6, Fam129a, Gnb2l1, Trpm6, Tnks2, Dbf4, Prkg2, Adrbk1, Usp42, Pik3ca, Anxa1, Pim3, Asb9, Fnip1, Maged1, Ssh3, Rps6kc1, Fgfr1, Atp7a, Slit2, Ppp1cb, Araf, Hyal2, Tgfbr1, Ubr5, Mark3, Smg1, Ccny, Pde6h, Srms, Rbck1, 1810031K17Rik, Aplp2, Ccl5, Itgb3, Ptpru, Ttll10, Il12a, Ccdc88c, Nub1, Fbxw11, Cd74, Cdk15, Map4k4, Traf2, Ptprb, Cdc42bpa, Gsk3b, Inhba, …
GO:0010467	gene expression	0.18901 ( 437 of 2312 genes )	0.11032 ( 3752 of 34011 annotated genes )	7.883e-33	2.769e-29	Terf2ip, Apbb1, Bdp1, Pparg, Prkcb, Aff3, Map2k3, Brd7, Fam129a, Eif2b4, Zzz3, Mta1, Gnb2l1, Med8, Dnmt3a, Eif4e, Aco1, Atf7ip, Xbp1, Snrpa, Trps1, Pik3ca, Flna, Mrpl4, Pex14, Rps3, Maged1, Fgfr1, Mef2d, Atp7a, Eif4g2, Lars, Slit2, Adat2, Nlrc5, Rps28, Tdrd9, Ccar1, Hyal2, Tgfbr1, Dido1, Tcfcp2l1, Rbm10, Myo6, Gas2l1, Lsm14a, Bhlha15, Rbbp8, Airn, Rbck1, Zmym2, Eif3j, Ccl5, Hmgn3, Smarcc1, Zfp786…
GO:0090304	nucleic acid metabolic pr	0.17950 ( 415 of 2312 genes )	0.10308 ( 3506 of 34011 annotated genes )	1.371e-32	4.815e-29	Terf2ip, Apbb1, Bdp1, Pparg, Prkcb, Aff3, Map2k3, Brd7, Zzz3, Mta1, Ciz1, Med8, Tnks2, Dnmt3a, Dbf4, Atf7ip, Xbp1, Rnaseh2b, Snrpa, Trps1, Dnase1l2, Pik3ca, Flna, Pex14, Rps3, Maged1, Fgfr1, Mef2d, Eif4g2, Lars, Adat2, Nlrc5, Rps28, Tdrd9, Ccar1, Hyal2, Tgfbr1, Dido1, Tcfcp2l1, Rbm10, Chtf18, Myo6, Smg1, Bhlha15, Rbbp8, Rbck1, Zmym2, Ccl5, Hmgn3, Smarcc1, Zfp786, Ikzf2, Fbxw11, Zscan20, Dmrt1, In…
GO:0009059	macromolecule biosyntheti	0.17647 ( 408 of 2312 genes )	0.10073 ( 3426 of 34011 annotated genes )	1.414e-32	4.969e-29	Terf2ip, Apbb1, Bdp1, Pparg, Prkcb, Aff3, Map2k3, Brd7, Fam129a, Eif2b4, Zzz3, Mta1, Gnb2l1, Ciz1, Med8, Dnmt3a, Eif4e, Dbf4, Aco1, Atf7ip, Xbp1, Trps1, Flna, Mrpl4, Pex14, Rps3, Maged1, Fgfr1, Mef2d, Atp7a, Eif4g2, Lars, Nlrc5, Rps28, Ppp1cb, Ccar1, Hyal2, Tgfbr1, Dido1, Tcfcp2l1, Rbm10, Chtf18, Myo6, Lsm14a, Bhlha15, Rbbp8, Rbck1, Zmym2, Eif3j, Itgb3, Hmgn3, Smarcc1, Zfp786, Ikzf2, Fbxw11, Zsca…
GO:0048856	anatomical structure deve	0.17604 ( 407 of 2312 genes )	0.10044 ( 3416 of 34011 annotated genes )	1.555e-32	5.462e-29	Megf11, Apbb1, Erbb3, Pparg, Prkcb, Aff3, Boc, Disc1, Birc6, Tctn3, Eif2b4, Gnb2l1, Krit1, Unc45a, Slc12a1, Trp53bp2, Myl3, Lgals8, Xbp1, Cntn3, Adrbk1, Ush1c, Pik3ca, Flna, Anxa1, Sulf2, Mcoln3, Dixdc1, Duox1, Nbr1, Maged1, Gna13, Ssh3, Fgfr1, Mef2d, Atp7a, Lect1, Slit2, Enpep, Adap2, Tgfbr1, Tcfcp2l1, Evl, Myo6, Gas2l1, Bhlha15, Rbbp8, Ptprz1, Aplp2, Ccl5, Itgb3, Cdh23, Smarcc1, Dmrt1, Cd74, Ch…
GO:0048518	positive regulation of bi	0.16739 ( 387 of 2312 genes )	0.09382 ( 3191 of 34011 annotated genes )	1.909e-32	6.706e-29	Terf2ip, Apbb1, Erbb3, Pparg, Prkcb, Abi3bp, Boc, Map2k3, Brd7, Gria4, Disc1, Birc6, Fam129a, Gnb2l1, Ciz1, Tnks2, Eif4e, Trp53bp2, Lgals8, Atf7ip, Fgf21, Adrbk1, Sun2, Pik3ca, Flna, Anxa1, Sulf2, Dkk2, Asb9, Dixdc1, Rps3, Maged1, Fgfr1, Mef2d, Lect1, Slit2, Nlrc5, Araf, Ccar1, Hyal2, Tgfbr1, Tcfcp2l1, Rbm10, Evl, Ubr5, Myo6, Bhlha15, Cacnb3, Ccny, Pde6h, Rbck1, Ccl5, Itgb3, Hmgn3, Smarcc1, Ikzf2…
GO:0034645	cellular macromolecule bi	0.17301 ( 400 of 2312 genes )	0.09820 ( 3340 of 34011 annotated genes )	2.034e-32	7.146e-29	Terf2ip, Apbb1, Bdp1, Pparg, Prkcb, Aff3, Map2k3, Brd7, Fam129a, Eif2b4, Zzz3, Mta1, Gnb2l1, Ciz1, Med8, Dnmt3a, Eif4e, Dbf4, Aco1, Atf7ip, Xbp1, Trps1, Flna, Mrpl4, Pex14, Rps3, Maged1, Fgfr1, Mef2d, Atp7a, Eif4g2, Lars, Nlrc5, Rps28, Ppp1cb, Ccar1, Hyal2, Tgfbr1, Dido1, Tcfcp2l1, Rbm10, Chtf18, Myo6, Lsm14a, Bhlha15, Rbbp8, Rbck1, Zmym2, Eif3j, Hmgn3, Smarcc1, Zfp786, Ikzf2, Fbxw11, Zscan20, Dm…
GO:0060255	regulation of macromolecu	0.18772 ( 434 of 2312 genes )	0.11073 ( 3766 of 34011 annotated genes )	1.547e-31	5.433e-28	Terf2ip, Apbb1, Bdp1, Erbb3, Pparg, Prkcb, Aff3, Map2k3, Brd7, Disc1, Fam129a, Eif2b4, Zzz3, Mta1, Gnb2l1, Ciz1, Med8, Dnmt3a, Eif4e, Aco1, Atf7ip, Xbp1, Trps1, Pik3ca, Flna, Pex14, Asb9, Rps3, Fnip1, Maged1, Fgfr1, Mef2d, Atp7a, Eif4g2, Slit2, Nlrc5, Ppp1cb, Araf, Tdrd9, Ccar1, Hyal2, Tgfbr1, Tcfcp2l1, Rbm10, Myo6, Gas2l1, Lsm14a, Bhlha15, Ccny, Rbbp8, Airn, Pde6h, Rbck1, 1810031K17Rik, Zmym2, A…
GO:0044249	cellular biosynthetic pro	0.20112 ( 465 of 2312 genes )	0.12202 ( 4150 of 34011 annotated genes )	4.371e-31	1.536e-27	Terf2ip, Apbb1, Bdp1, Pparg, Prkcb, Aff3, Map2k3, Brd7, Fam129a, Eif2b4, Zzz3, Mta1, Gnb2l1, Ciz1, Med8, Dnmt3a, Eif4e, Dbf4, Aco1, Atp1a4, Atf7ip, Xbp1, Slc27a5, Trps1, Flna, Anxa1, Mrpl4, Pex14, Adssl1, Rps3, Maged1, Gna13, Fgfr1, Mef2d, Atp7a, Eif4g2, Lars, Nlrc5, Rps28, Ppp1cb, Ccar1, Hyal2, Tgfbr1, Dido1, Tcfcp2l1, Rbm10, Chtf18, Myo6, Pdss1, Lsm14a, Bhlha15, Rbbp8, Rbck1, Zmym2, Eif3j, Ccl5…
GO:0048522	positive regulation of ce	0.15268 ( 353 of 2312 genes )	0.08441 ( 2871 of 34011 annotated genes )	1.352e-30	4.751e-27	Terf2ip, Apbb1, Pparg, Prkcb, Abi3bp, Boc, Map2k3, Brd7, Gria4, Disc1, Birc6, Fam129a, Gnb2l1, Ciz1, Tnks2, Eif4e, Trp53bp2, Lgals8, Atf7ip, Fgf21, Adrbk1, Sun2, Pik3ca, Flna, Anxa1, Sulf2, Dkk2, Dixdc1, Rps3, Maged1, Fgfr1, Mef2d, Slit2, Nlrc5, Araf, Ccar1, Hyal2, Tgfbr1, Rbm10, Evl, Ubr5, Myo6, Bhlha15, Ccny, Pde6h, Rbck1, Ccl5, Itgb3, Hmgn3, Smarcc1, Ikzf2, Il12a, Nub1, Fbxw11, Dmrt1, Cd74, La…
GO:0016070	RNA metabolic process	0.16133 ( 373 of 2312 genes )	0.09182 ( 3123 of 34011 annotated genes )	7.333e-30	2.576e-26	Terf2ip, Apbb1, Bdp1, Pparg, Prkcb, Aff3, Map2k3, Brd7, Zzz3, Mta1, Med8, Dnmt3a, Atf7ip, Xbp1, Rnaseh2b, Snrpa, Trps1, Flna, Pex14, Rps3, Maged1, Fgfr1, Mef2d, Eif4g2, Lars, Adat2, Nlrc5, Rps28, Tdrd9, Ccar1, Hyal2, Tgfbr1, Dido1, Tcfcp2l1, Rbm10, Myo6, Smg1, Bhlha15, Rbbp8, Rbck1, Zmym2, Ccl5, Hmgn3, Smarcc1, Zfp786, Ikzf2, Fbxw11, Zscan20, Dmrt1, Ints9, Traf2, Gsk3b, Inhba, Sox5, Eid1, Cdc73, …
GO:0048731	system development	0.15657 ( 362 of 2312 genes )	0.08850 ( 3010 of 34011 annotated genes )	1.615e-29	5.672e-26	Megf11, Apbb1, Erbb3, Pparg, Prkcb, Boc, Disc1, Birc6, Eif2b4, Krit1, Unc45a, Slc12a1, Trp53bp2, Myl3, Lgals8, Xbp1, Cntn3, Adrbk1, Ush1c, Pik3ca, Flna, Anxa1, Sulf2, Mcoln3, Dixdc1, Nbr1, Maged1, Gna13, Ssh3, Fgfr1, Mef2d, Atp7a, Lect1, Slit2, Enpep, Adap2, Tgfbr1, Tcfcp2l1, Evl, Myo6, Gas2l1, Ptprz1, Aplp2, Ccl5, Itgb3, Cdh23, Smarcc1, Dmrt1, Cd74, Chrnd, Lama2, Ptprb, Gsk3b, Inhba, Vash1, Dst,…
GO:0006996	organelle organization	0.10943 ( 253 of 2312 genes )	0.05448 ( 1853 of 34011 annotated genes )	2.278e-28	8.003e-25	Terf2ip, Apbb1, Ino80, Cenpt, Mycbp2, Tacc3, Ctcf, Prkcb, Kif20b, Pam, Kif2a, Brd7, Cald1, Disc1, Birc6, Cntrob, Ift46, Mta1, Msh2, Tnks2, Dnmt3a, Scarb2, Sdc4, Pds5a, Stx5a, Kdm2a, Ush1c, Sun2, Dctn2, Flna, Anxa1, Cog2, Sgol1, Ccdc88a, Pex14, Pim3, Dixdc1, Ssh3, Ap2b1, Kirrel, Smyd1, Atp7a, Nipbl, Slit2, Coro2a, Dock7, Rgnef, 4933424B01Rik, Dot1l, Aqp2, Evl, Gas2l1, Bhlha15, Rbbp8, Setd8, Diap2,…
GO:0019219	regulation of nucleobase,	0.15311 ( 354 of 2312 genes )	0.08753 ( 2977 of 34011 annotated genes )	6.628e-28	2.328e-24	Terf2ip, Apbb1, Bdp1, Pparg, Prkcb, Aff3, Map2k3, Brd7, Zzz3, Mta1, Gnb2l1, Ciz1, Med8, Dnmt3a, Atf7ip, Xbp1, Trps1, Pik3ca, Flna, Pex14, Rps3, Maged1, Gna13, Arap3, Fgfr1, Mef2d, Arhgap1, Nlrc5, Tbck, Adap2, Ccar1, Hyal2, Tgfbr1, Tcfcp2l1, Rbm10, Myo6, Bhlha15, Rbbp8, Rbck1, Zmym2, Ahsa1, Ccl5, Hmgn3, Smarcc1, Zfp786, Ralgapb, Ikzf2, Fbxw11, Zscan20, Dmrt1, Traf2, Arfgap1, Gsk3b, Inhba, Sox5, Ei…
GO:0065008	regulation of biological	0.12500 ( 289 of 2312 genes )	0.06668 ( 2268 of 34011 annotated genes )	2.197e-27	7.717e-24	Terf2ip, Apbb1, Slc39a14, Pparg, Prkcb, Disc1, Eif2b4, Gnb2l1, Krit1, Ciz1, Slc22a1, Tro, Tnks2, 2700094K13Rik, Slc12a1, Aco1, Myl3, Atp1a4, Scn9a, Xbp1, Adrbk1, Scara5, Pdilt, Sun2, Flna, Anxa1, Sgol1, Pex14, Pim3, Gna13, Ssh3, Ap2b1, Arap3, Atp7a, Slit2, Enpep, Hyal2, Tgfbr1, Evl, Myo6, Gas2l1, Bhlha15, Aplp2, Ccl5, Itgb3, Hmgn3, Cdh23, Scn3a, Bsnd, Ccdc88c, Fbxw11, Cd74, Chrnd, Kcnk2, Gsk3b, I…
GO:0051171	regulation of nitrogen co	0.15311 ( 354 of 2312 genes )	0.08847 ( 3009 of 34011 annotated genes )	4.869e-27	1.71e-23	Terf2ip, Apbb1, Bdp1, Pparg, Prkcb, Aff3, Map2k3, Brd7, Zzz3, Mta1, Gnb2l1, Ciz1, Med8, Dnmt3a, Atf7ip, Xbp1, Trps1, Pik3ca, Flna, Pex14, Rps3, Maged1, Gna13, Arap3, Fgfr1, Mef2d, Arhgap1, Nlrc5, Tbck, Adap2, Ccar1, Hyal2, Tgfbr1, Tcfcp2l1, Rbm10, Myo6, Bhlha15, Rbbp8, Rbck1, Zmym2, Ahsa1, Ccl5, Hmgn3, Smarcc1, Zfp786, Ralgapb, Ikzf2, Fbxw11, Zscan20, Dmrt1, Traf2, Arfgap1, Gsk3b, Inhba, Sox5, Ei…
GO:0035556	intracellular signal tran	0.09905 ( 229 of 2312 genes )	0.04837 ( 1645 of 34011 annotated genes )	7.54e-27	2.649e-23	Terf2ip, Erbb3, Arl4c, Prkcb, Map2k3, Disc1, Fzd7, Msh2, Rras, Gnb2l1, Ltk, Rab13, Casq2, Map3k5, Adora2b, Rab2a, Agtr1a, Fgf21, Pde8a, Pik3ca, Flna, Car8, Ccdc88a, Psap, Itsn1, Asb9, Dixdc1, Scg2, Rp1l1, Nbr1, Gna13, Arap3, Tnfrsf19, Fgfr1, Rasgef1b, Slit2, Arhgap1, Dnajc27, Fktn, Tbck, Dock7, Araf, Rgnef, Adap2, Hyal2, Dot1l, Rab28, Tgfbr1, Myo6, Map4k5, Tbc1d5, Bhlha15, Pde6h, Rbck1, Setd8, Cc…
GO:0048869	cellular developmental pr	0.13711 ( 317 of 2312 genes )	0.07645 ( 2600 of 34011 annotated genes )	9.894e-27	3.476e-23	Apbb1, Erbb3, Pparg, Boc, Disc1, Tctn3, Eif2b4, Unc45a, Lgals8, Xbp1, Ush1c, Usp42, Pdilt, Flna, Anxa1, Sulf2, Mcoln3, Dixdc1, Nbr1, Gna13, Ssh3, Fgfr1, Mef2d, Atp7a, Lect1, Slit2, Tdrd9, Tgfbr1, Tcfcp2l1, Evl, Myo6, Gas2l1, Bhlha15, Ptprz1, Ccl5, Itgb3, Ptpru, Diap2, Cdh23, Dmrt1, Cd74, Lama2, Clgn, Gsk3b, Inhba, Dst, Sox5, Eid1, Cdc73, Rab3a, Ccdc135, Ilk, Ighmbp2, Ocrl, Ncaph2, Hdac4, Cnga3, A…
GO:2000112	regulation of cellular ma	0.14014 ( 324 of 2312 genes )	0.07971 ( 2711 of 34011 annotated genes )	7.833e-26	2.752e-22	Terf2ip, Apbb1, Bdp1, Pparg, Prkcb, Aff3, Map2k3, Brd7, Fam129a, Eif2b4, Zzz3, Mta1, Gnb2l1, Ciz1, Med8, Dnmt3a, Eif4e, Aco1, Atf7ip, Xbp1, Trps1, Flna, Pex14, Rps3, Maged1, Fgfr1, Mef2d, Eif4g2, Nlrc5, Ppp1cb, Ccar1, Hyal2, Tgfbr1, Tcfcp2l1, Rbm10, Myo6, Lsm14a, Bhlha15, Rbbp8, Rbck1, Zmym2, Hmgn3, Smarcc1, Zfp786, Ikzf2, Fbxw11, Zscan20, Dmrt1, Eif4e3, Traf2, Gsk3b, Inhba, Sox5, Eid1, Cdc73, Te…
GO:0010556	regulation of macromolecu	0.14273 ( 330 of 2312 genes )	0.08174 ( 2780 of 34011 annotated genes )	8.212e-26	2.885e-22	Terf2ip, Apbb1, Bdp1, Pparg, Prkcb, Aff3, Map2k3, Brd7, Fam129a, Eif2b4, Zzz3, Mta1, Gnb2l1, Ciz1, Med8, Dnmt3a, Eif4e, Aco1, Atf7ip, Xbp1, Trps1, Flna, Pex14, Rps3, Maged1, Fgfr1, Mef2d, Eif4g2, Nlrc5, Ppp1cb, Ccar1, Hyal2, Tgfbr1, Tcfcp2l1, Rbm10, Myo6, Lsm14a, Bhlha15, Rbbp8, Rbck1, Zmym2, Itgb3, Hmgn3, Smarcc1, Zfp786, Ikzf2, Fbxw11, Zscan20, Dmrt1, Eif4e3, Traf2, Gsk3b, Inhba, Sox5, Eid1, Cd…
GO:0009653	anatomical structure morp	0.10294 ( 238 of 2312 genes )	0.05278 ( 1795 of 34011 annotated genes )	6.872e-25	2.414e-21	Megf11, Apbb1, Mycbp2, Prkcb, Aff3, Boc, Sp3, Frzb, Asap1, Disc1, Tctn3, Ninj1, Fzd7, Rras, Gnb2l1, Krit1, 2400003C14Rik, Fam20c, Dmd, Myl3, Adora2b, Agtr1a, Ush1c, Gpc1, Pik3ca, Flna, Dixdc1, Scg2, Col11a1, Maged1, Gna13, Dscam, Ssh3, Fgfr1, Mef2d, Otx1, Atp7a, Nipbl, Lect1, Slit2, Dock7, Eomes, Rgnef, Enpep, Hoxa3, Itga8, Tgfbr1, Tcfcp2l1, Evl, Myo6, Ptprz1, Ccl5, Itgb3, Lias, Fert2, Cdh23, Fbx…
GO:0009889	regulation of biosyntheti	0.14836 ( 343 of 2312 genes )	0.08718 ( 2965 of 34011 annotated genes )	7.181e-25	2.523e-21	Terf2ip, Apbb1, Bdp1, Pparg, Prkcb, Aff3, Map2k3, Brd7, Fam129a, Eif2b4, Zzz3, Mta1, Gnb2l1, Ciz1, Med8, Dnmt3a, Eif4e, Aco1, Atf7ip, Xbp1, Trps1, Flna, Anxa1, Pex14, Rps3, Maged1, Gna13, Fgfr1, Mef2d, Eif4g2, Nlrc5, Ppp1cb, Ccar1, Hyal2, Tgfbr1, Tcfcp2l1, Rbm10, Myo6, Lsm14a, Bhlha15, Rbbp8, Rbck1, Zmym2, Ccl5, Itgb3, Hmgn3, Smarcc1, Zfp786, Ikzf2, Fbxw11, Zscan20, Dmrt1, Eif4e3, Gchfr, Traf2, G…
GO:0006796	phosphate metabolic proce	0.09862 ( 228 of 2312 genes )	0.04987 ( 1696 of 34011 annotated genes )	1.178e-24	4.139e-21	Erbb3, Prkcb, Csnk2a2, Map2k3, Fam129a, Dusp28, Fzd7, Msh2, Gnb2l1, Trpm6, Fam20c, Ltk, Map3k5, Dbf4, Sdc4, Prkg2, Agtr1a, Adrbk1, Pank1, Pik3ca, Myo3b, Polr2a, Mtmr11, Ccdc88a, Ptpn3, Morc3, Pim3, Itsn1, Ccnc, Fnip1, Maged1, Dscam, Ssh3, Kirrel, Rps6kc1, Fgfr1, Atp7a, Slit2, Nlrc5, Ppp1cb, Dock7, Araf, Hyal2, Tgfbr1, Akap14, Mark3, Map4k5, Fkbp15, Smg1, Mpp6, Ccny, Inpp4b, Pde6h, Srms, 1810031K1…
GO:0006793	phosphorus metabolic proc	0.09862 ( 228 of 2312 genes )	0.04993 ( 1698 of 34011 annotated genes )	1.381e-24	4.85e-21	Erbb3, Prkcb, Csnk2a2, Map2k3, Fam129a, Dusp28, Fzd7, Msh2, Gnb2l1, Trpm6, Fam20c, Ltk, Map3k5, Dbf4, Sdc4, Prkg2, Agtr1a, Adrbk1, Pank1, Pik3ca, Myo3b, Polr2a, Mtmr11, Ccdc88a, Ptpn3, Morc3, Pim3, Itsn1, Ccnc, Fnip1, Maged1, Dscam, Ssh3, Kirrel, Rps6kc1, Fgfr1, Atp7a, Slit2, Nlrc5, Ppp1cb, Dock7, Araf, Hyal2, Tgfbr1, Akap14, Mark3, Map4k5, Fkbp15, Smg1, Mpp6, Ccny, Inpp4b, Pde6h, Srms, 1810031K1…
GO:0030154	cell differentiation	0.12976 ( 300 of 2312 genes )	0.07327 ( 2492 of 34011 annotated genes )	2.222e-24	7.806e-21	Apbb1, Erbb3, Pparg, Boc, Disc1, Eif2b4, Unc45a, Lgals8, Xbp1, Ush1c, Usp42, Pdilt, Flna, Anxa1, Sulf2, Mcoln3, Dixdc1, Nbr1, Gna13, Ssh3, Fgfr1, Mef2d, Atp7a, Lect1, Slit2, Tdrd9, Tgfbr1, Tcfcp2l1, Evl, Myo6, Gas2l1, Bhlha15, Ptprz1, Ccl5, Itgb3, Ptpru, Diap2, Cdh23, Dmrt1, Cd74, Lama2, Clgn, Gsk3b, Inhba, Dst, Sox5, Eid1, Cdc73, Rab3a, Ccdc135, Ilk, Ighmbp2, Ncaph2, Hdac4, Cnga3, Apob, Sgk1, Hm…
GO:0031326	regulation of cellular bi	0.14576 ( 337 of 2312 genes )	0.08609 ( 2928 of 34011 annotated genes )	4.834e-24	1.698e-20	Terf2ip, Apbb1, Bdp1, Pparg, Prkcb, Aff3, Map2k3, Brd7, Fam129a, Eif2b4, Zzz3, Mta1, Gnb2l1, Ciz1, Med8, Dnmt3a, Eif4e, Aco1, Atf7ip, Xbp1, Trps1, Flna, Anxa1, Pex14, Rps3, Maged1, Gna13, Fgfr1, Mef2d, Eif4g2, Nlrc5, Ppp1cb, Ccar1, Hyal2, Tgfbr1, Tcfcp2l1, Rbm10, Myo6, Lsm14a, Bhlha15, Rbbp8, Rbck1, Zmym2, Ccl5, Hmgn3, Smarcc1, Zfp786, Ikzf2, Fbxw11, Zscan20, Dmrt1, Eif4e3, Traf2, Gsk3b, Inhba, S…
GO:0065009	regulation of molecular f	0.10164 ( 235 of 2312 genes )	0.05272 ( 1793 of 34011 annotated genes )	6.816e-24	2.394e-20	Terf2ip, Erbb3, Pparg, Ctcf, Prkcb, Map2k3, Cald1, Birc6, Msh2, Cacna1h, Gnb2l1, Krit1, Casq2, Map3k5, Kng2, Sdc4, Adora2b, Agtr1a, Ppp1r1a, Hbxip, Flna, Anxa1, Ccdc88a, Pex14, Itsn1, Rps3, Nosip, Ccnc, Maged1, Gna13, Arap3, Fgfr1, Atp7a, Slit2, Arhgap1, Nlrc5, Tbck, Dock7, Araf, Adap2, Hyal2, Tgfbr1, Tbc1d5, Fkbp15, Cacnb3, Ccny, Pde6h, Rbck1, 1810031K17Rik, Aplp2, Ahsa1, Ccl5, Itgb3, Serpinb12,…
GO:0048519	negative regulation of bi	0.14490 ( 335 of 2312 genes )	0.08559 ( 2911 of 34011 annotated genes )	6.932e-24	2.435e-20	Terf2ip, Apbb1, Erbb3, Pparg, Prkcb, Brd7, Birc6, Fam129a, Eif2b4, Gnb2l1, Krit1, Tro, Dnmt3a, Atf7ip, Adrbk1, Trps1, Pik3ca, Flna, Anxa1, Sulf2, Pex14, Dkk2, Pim3, Dixdc1, Rps3, Nbr1, Maged1, Arap3, Fgfr1, Atp7a, Lect1, Slit2, Nlrc5, Araf, Tdrd9, Hyal2, Tgfbr1, Tcfcp2l1, Rbm10, Evl, Gas2l1, Rbbp8, Ccl5, Itgb3, Ptpru, Il12a, Fbxw11, Dmrt1, Cd74, Faim, Gm885, Gchfr, Traf2, Prtn3, Gsk3b, Inhba, Vas…
GO:0010468	regulation of gene expres	0.14879 ( 344 of 2312 genes )	0.08894 ( 3025 of 34011 annotated genes )	1.184e-23	4.159e-20	Terf2ip, Apbb1, Bdp1, Pparg, Prkcb, Aff3, Map2k3, Brd7, Fam129a, Eif2b4, Zzz3, Mta1, Gnb2l1, Med8, Dnmt3a, Eif4e, Aco1, Atf7ip, Xbp1, Trps1, Pik3ca, Flna, Pex14, Rps3, Maged1, Fgfr1, Mef2d, Atp7a, Eif4g2, Slit2, Nlrc5, Tdrd9, Ccar1, Hyal2, Tgfbr1, Tcfcp2l1, Rbm10, Myo6, Gas2l1, Lsm14a, Bhlha15, Rbbp8, Airn, Rbck1, Zmym2, Ccl5, Hmgn3, Smarcc1, Zfp786, Ikzf2, Ccdc88c, Fbxw11, Zscan20, Dmrt1, Eif4e3…
GO:0033036	macromolecule localizatio	0.08953 ( 207 of 2312 genes )	0.04475 ( 1522 of 34011 annotated genes )	4.867e-23	1.71e-19	Terf2ip, Apbb1, Gga1, Mycbp2, Pparg, Tacc3, Pam, Ift46, Fzd7, Gnb2l1, Tnks2, Rab13, Scarb2, Nup214, Ap2a1, Rab2a, Agtr1a, Slc27a5, Stx5a, Exoc5, Sun2, Flna, Anxa1, Cog2, Sgol1, Pex14, Copb1, Morc3, Nup160, Exoc3, Ap2b1, Igf2bp1, Scfd2, Nipbl, Nxf1, Rps28, Itga8, Hyal2, Tgfbr1, Snx7, Ubr5, Nup93, Myo6, Vps25, Nup107, Rbck1, Itgb3, Rab33a, Ptpru, Myo5b, Ralgapb, Fbxw11, Cd74, Abcg1, Arfgap1, Traf2,…
GO:0007399	nervous system developmen	0.08434 ( 195 of 2312 genes )	0.04143 ( 1409 of 34011 annotated genes )	1.276e-22	4.481e-19	Apbb1, Mycbp2, Erbb3, Pparg, Tacc3, Boc, Kif2a, Ngrn, Frzb, Disc1, Eif2b4, Fzd7, 2400003C14Rik, Ltk, Kcnma1, Trp53bp2, Dmd, Cntn3, Ush1c, Gpc1, Sulf2, Ccdc88a, Atrx, Mcoln3, Dixdc1, Rp1l1, Dscam, Ssh3, Fgfr1, Mef2d, Otx1, Atp7a, Nipbl, Slit2, Fktn, Dock7, Eomes, Rgnef, Hoxa3, Itga8, Tgfbr1, Evl, Myo6, Ptprz1, Aplp2, Ccl5, Lias, Cdh23, Smarcc1, Lama2, Vasp, Creb1, Gsk3b, Dst, Sox5, Serpine2, Cldn5…
GO:0051641	cellular localization	0.08953 ( 207 of 2312 genes )	0.04510 ( 1534 of 34011 annotated genes )	1.276e-22	4.483e-19	Terf2ip, Apbb1, Gga1, Arl4c, Tacc3, Prkcb, Pam, Ift46, Fzd7, Cacna1h, Gnb2l1, Ciz1, Tnks2, Rab13, Scarb2, Casq2, Nup214, Dmd, Ap2a1, Adora2b, Rab2a, Agtr1a, Xbp1, Stx5a, Adrbk1, Exoc5, Sun2, Flna, Anxa1, Cog2, Sgol1, Pex14, Copb1, Morc3, Pim3, Nup160, Exoc3, Ap2b1, Scfd2, Sdccag1, Nipbl, Nxf1, Rps28, Trim36, Hyal2, Tgfbr1, Ubr5, Myo6, Bhlha15, Nup107, Rbck1, Ccl5, Ptpru, Hmgn3, Fnbp1l, Alb, Ralga…
GO:0008104	protein localization	0.07958 ( 184 of 2312 genes )	0.03893 ( 1324 of 34011 annotated genes )	1.39e-21	4.885e-18	Terf2ip, Apbb1, Gga1, Mycbp2, Pparg, Tacc3, Pam, Ift46, Fzd7, Gnb2l1, Tnks2, Rab13, Scarb2, Nup214, Ap2a1, Rab2a, Agtr1a, Stx5a, Exoc5, Sun2, Flna, Anxa1, Cog2, Sgol1, Pex14, Copb1, Morc3, Nup160, Exoc3, Ap2b1, Scfd2, Nipbl, Itga8, Hyal2, Tgfbr1, Snx7, Ubr5, Nup93, Myo6, Vps25, Nup107, Rbck1, Rab33a, Ptpru, Myo5b, Ralgapb, Fbxw11, Cd74, Abcg1, Arfgap1, Traf2, Gsk3b, Erc1, Tnpo1, Rpain, Vps13c, Ra…
GO:0032774	RNA biosynthetic process	0.12846 ( 297 of 2312 genes )	0.07550 ( 2568 of 34011 annotated genes )	1.878e-21	6.599e-18	Terf2ip, Apbb1, Bdp1, Pparg, Prkcb, Aff3, Map2k3, Brd7, Zzz3, Mta1, Med8, Dnmt3a, Atf7ip, Xbp1, Trps1, Flna, Pex14, Rps3, Maged1, Fgfr1, Mef2d, Nlrc5, Ccar1, Hyal2, Tgfbr1, Dido1, Tcfcp2l1, Rbm10, Myo6, Bhlha15, Rbbp8, Rbck1, Zmym2, Ccl5, Hmgn3, Smarcc1, Zfp786, Ikzf2, Fbxw11, Zscan20, Dmrt1, Traf2, Gsk3b, Inhba, Sox5, Eid1, Cdc73, Tead1, Top2a, Ilk, Ighmbp2, Son, Hdac4, Rad21, Med12, Brwd1, Xab2…
GO:0051252	regulation of RNA metabol	0.12803 ( 296 of 2312 genes )	0.07533 ( 2562 of 34011 annotated genes )	2.592e-21	9.104e-18	Terf2ip, Apbb1, Bdp1, Pparg, Prkcb, Aff3, Map2k3, Brd7, Zzz3, Mta1, Med8, Dnmt3a, Atf7ip, Xbp1, Trps1, Flna, Pex14, Rps3, Maged1, Fgfr1, Mef2d, Nlrc5, Ccar1, Hyal2, Tgfbr1, Tcfcp2l1, Rbm10, Myo6, Bhlha15, Rbbp8, Rbck1, Zmym2, Hmgn3, Smarcc1, Zfp786, Ikzf2, Fbxw11, Zscan20, Dmrt1, Traf2, Gsk3b, Inhba, Sox5, Eid1, Cdc73, Tead1, Top2a, Ilk, Ighmbp2, Son, Hdac4, Rad21, Med12, Brwd1, Tcfcp2, Prkci, Na…
GO:0048523	negative regulation of ce	0.13019 ( 301 of 2312 genes )	0.07706 ( 2621 of 34011 annotated genes )	2.792e-21	9.807e-18	Terf2ip, Apbb1, Erbb3, Pparg, Prkcb, Brd7, Birc6, Fam129a, Eif2b4, Gnb2l1, Krit1, Tro, Dnmt3a, Atf7ip, Adrbk1, Trps1, Pik3ca, Anxa1, Sulf2, Pex14, Dkk2, Pim3, Dixdc1, Rps3, Nbr1, Maged1, Arap3, Fgfr1, Atp7a, Lect1, Slit2, Nlrc5, Araf, Hyal2, Tgfbr1, Tcfcp2l1, Rbm10, Evl, Gas2l1, Rbbp8, Ccl5, Itgb3, Ptpru, Il12a, Fbxw11, Dmrt1, Cd74, Faim, Gm885, Traf2, Prtn3, Gsk3b, Inhba, Vash1, Dst, Sox5, Eid1,…
GO:0009056	catabolic process	0.09213 ( 213 of 2312 genes )	0.04828 ( 1642 of 34011 annotated genes )	3.804e-21	1.336e-17	Ino80, Kif20b, Disc1, Pygm, Msh2, Oc90, Rras, Gnb2l1, Atp2a2, Rab13, Aco1, Atp1a4, Atf7ip, Rab2a, Usp24, Rnaseh2b, Usp42, Dnase1l2, Gpc1, Flna, Ipcef1, Ptpn3, Asb9, Nbr1, Gna13, Arap3, Atp7a, Arhgap1, Ppp1cb, Tbck, Dock7, Adap2, Hyal2, Ubr5, Tbc1d5, Smg1, Rbbp8, Inpp4b, Rbck1, Lsm1, Ahsa1, Gnl2, Fnbp1l, Ralgapb, Ppp2r5c, Nub1, Fbxw11, Abcg1, Dedd, Pgls, Arfgap1, Traf2, Arap2, Gsk3b, Lyve1, Serpin…
GO:0006351	transcription, DNA-depend	0.12760 ( 295 of 2312 genes )	0.07530 ( 2561 of 34011 annotated genes )	4.775e-21	1.677e-17	Terf2ip, Apbb1, Bdp1, Pparg, Prkcb, Aff3, Map2k3, Brd7, Zzz3, Mta1, Med8, Dnmt3a, Atf7ip, Xbp1, Trps1, Flna, Pex14, Rps3, Maged1, Fgfr1, Mef2d, Nlrc5, Ccar1, Hyal2, Tgfbr1, Dido1, Tcfcp2l1, Rbm10, Myo6, Bhlha15, Rbbp8, Rbck1, Zmym2, Hmgn3, Smarcc1, Zfp786, Ikzf2, Fbxw11, Zscan20, Dmrt1, Traf2, Gsk3b, Inhba, Sox5, Eid1, Cdc73, Tead1, Top2a, Ilk, Ighmbp2, Son, Hdac4, Rad21, Med12, Brwd1, Xab2, Tcfc…
GO:0048583	regulation of response to	0.10164 ( 235 of 2312 genes )	0.05548 ( 1887 of 34011 annotated genes )	5.75e-21	2.02e-17	Terf2ip, Apbb1, Erbb3, Pparg, Trpm4, Prkcb, Map2k3, Frzb, Disc1, Tnks2, Fam20c, Map3k5, Adora2b, Fgf21, Adrbk1, Gpc1, Flna, Anxa1, Sulf2, Psap, Dkk2, Itsn1, Dixdc1, Rps3, Scg2, Nbr1, Maged1, Dscam, Arap3, Tnfrsf19, Fgfr1, Rasgef1b, H2-K1, Lect1, Slit2, Arhgap1, Nlrc5, Fktn, Tbck, Dock7, Rgnef, Adap2, Itga8, Hyal2, Dot1l, Tgfbr1, Ubr5, Tbc1d5, Cacnb3, Ccny, Pde6h, Rbck1, Setd8, Aplp2, Ccl5, Itgb3,…
GO:0023051	regulation of signaling	0.09516 ( 220 of 2312 genes )	0.05069 ( 1724 of 34011 annotated genes )	6.089e-21	2.139e-17	Terf2ip, Erbb3, Pparg, Trpm4, Prkcb, Map2k3, Frzb, Gria4, Disc1, Tnks2, Fam20c, Map3k5, Agtr1a, Fgf21, Adrbk1, Gpc1, Flna, Sulf2, Psap, Dkk2, Pim3, Itsn1, Dixdc1, Nbr1, Maged1, Arap3, Tnfrsf19, Fgfr1, Rasgef1b, Lect1, Slit2, Arhgap1, Nlrc5, Fktn, Tbck, Dock7, Rgnef, Adap2, Itga8, Hyal2, Dot1l, Tgfbr1, Ubr5, Myo6, Tbc1d5, Ccny, Pde6h, Rbck1, Setd8, Aplp2, Ccl5, Itgb3, Fert2, Hmgn3, Ralgapb, Il12a,…
GO:0032879	regulation of localizatio	0.07958 ( 184 of 2312 genes )	0.03960 ( 1347 of 34011 annotated genes )	9.318e-21	3.274e-17	Apbb1, Mycbp2, Erbb3, Pparg, Tacc3, Trpm4, Prkcb, Pam, Fzd7, Cacna1h, Rras, Gnb2l1, Krit1, Kcnma1, Casq2, Scn9a, Adora2b, Agtr1a, Fgf21, Adrbk1, Tpcn1, Sun2, Flna, Anxa1, Pim3, Gna13, Dscam, Arap3, Slit2, Slc9a3, Hyal2, Tgfbr1, Aqp2, Ubr5, Myo6, Cacnb3, Rbck1, Ccl5, Itgb3, Ptpru, Fert2, Hmgn3, Scn3a, Myo5b, Ralgapb, Fbxw11, Cd74, Kcnk2, Abcg1, Pclo, Creb1, Traf2, Prtn3, Gsk3b, Inhba, Vash1, Serpi…
GO:0016310	phosphorylation	0.08391 ( 194 of 2312 genes )	0.04272 ( 1453 of 34011 annotated genes )	1.031e-20	3.623e-17	Erbb3, Prkcb, Csnk2a2, Map2k3, Fam129a, Fzd7, Msh2, Gnb2l1, Trpm6, Fam20c, Ltk, Map3k5, Dbf4, Sdc4, Prkg2, Agtr1a, Adrbk1, Pank1, Pik3ca, Myo3b, Polr2a, Ccdc88a, Morc3, Pim3, Itsn1, Ccnc, Fnip1, Maged1, Dscam, Kirrel, Rps6kc1, Fgfr1, Atp7a, Slit2, Nlrc5, Dock7, Araf, Hyal2, Tgfbr1, Akap14, Mark3, Map4k5, Smg1, Mpp6, Ccny, Pde6h, Srms, 1810031K17Rik, St3gal1, Aplp2, Ccl5, Itgb3, Fert2, Il12a, Ccdc…
GO:0050790	regulation of catalytic a	0.08304 ( 192 of 2312 genes )	0.04231 ( 1439 of 34011 annotated genes )	1.79e-20	6.289e-17	Erbb3, Pparg, Map2k3, Birc6, Msh2, Gnb2l1, Krit1, Map3k5, Kng2, Sdc4, Adora2b, Agtr1a, Ppp1r1a, Hbxip, Flna, Anxa1, Ccdc88a, Itsn1, Rps3, Nosip, Ccnc, Maged1, Gna13, Arap3, Fgfr1, Atp7a, Slit2, Arhgap1, Nlrc5, Tbck, Dock7, Araf, Adap2, Hyal2, Tgfbr1, Tbc1d5, Fkbp15, Ccny, Pde6h, 1810031K17Rik, Aplp2, Ahsa1, Ccl5, Itgb3, Serpinb12, Dock10, Ralgapb, Cd74, Il7, Gchfr, Arfgap1, Traf2, Arap2, Gsk3b, S…
GO:0009966	regulation of signal tran	0.08391 ( 194 of 2312 genes )	0.04313 ( 1467 of 34011 annotated genes )	3.036e-20	1.066e-16	Terf2ip, Erbb3, Pparg, Trpm4, Prkcb, Map2k3, Frzb, Disc1, Tnks2, Fam20c, Map3k5, Fgf21, Adrbk1, Gpc1, Flna, Sulf2, Psap, Dkk2, Itsn1, Dixdc1, Nbr1, Maged1, Arap3, Tnfrsf19, Fgfr1, Rasgef1b, Lect1, Slit2, Arhgap1, Nlrc5, Fktn, Tbck, Dock7, Rgnef, Adap2, Itga8, Hyal2, Dot1l, Tgfbr1, Ubr5, Tbc1d5, Ccny, Pde6h, Rbck1, Setd8, Aplp2, Ccl5, Itgb3, Fert2, Ralgapb, Il12a, Cd74, Cilp, Map4k4, Arfgap1, Traf…
GO:0050896	response to stimulus	0.27638 ( 639 of 2312 genes )	0.20335 ( 6916 of 34011 annotated genes )	3.186e-20	1.119e-16	Terf2ip, Apbb1, Erbb3, Aff3, Arhgap11a, Map2k3, Brd7, Olfr613, Gria4, Disc1, Olfr459, Slc22a1, Trpm6, Dnmt3a, Olfr1298, Ppp1r1a, Olfr281, Fgf21, Adrbk1, Flna, Anxa1, Sulf2, Mcoln3, Asb9, Dixdc1, Duox1, Gpr82, Arap3, Fgfr1, Gpr153, Nlrc5, Tbck, Araf, Hyal2, Tgfbr1, Slc6a14, Ubr5, Gas2l1, Nlrx1, Smg1, Bhlha15, Cacnb3, Rbbp8, Rbck1, Ahsa1, Itgb3, Ptpru, Emr1, Hmgn3, Scn3a, Smarcc1, Atad5, Il12a, Ccd…
GO:0006355	regulation of transcripti	0.12327 ( 285 of 2312 genes )	0.07318 ( 2489 of 34011 annotated genes )	5.793e-20	2.035e-16	Terf2ip, Apbb1, Bdp1, Pparg, Prkcb, Aff3, Map2k3, Brd7, Zzz3, Mta1, Med8, Dnmt3a, Atf7ip, Xbp1, Trps1, Flna, Pex14, Rps3, Maged1, Fgfr1, Mef2d, Nlrc5, Ccar1, Hyal2, Tgfbr1, Tcfcp2l1, Rbm10, Myo6, Bhlha15, Rbbp8, Rbck1, Zmym2, Hmgn3, Smarcc1, Zfp786, Ikzf2, Fbxw11, Zscan20, Dmrt1, Traf2, Gsk3b, Inhba, Sox5, Eid1, Cdc73, Tead1, Top2a, Ilk, Ighmbp2, Son, Hdac4, Rad21, Med12, Brwd1, Tcfcp2, Prkci, Na…
GO:0044248	cellular catabolic proces	0.07872 ( 182 of 2312 genes )	0.04055 ( 1379 of 34011 annotated genes )	5.998e-19	2.107e-15	Ino80, Kif20b, Disc1, Msh2, Rras, Gnb2l1, Atp2a2, Rab13, Aco1, Atp1a4, Atf7ip, Rab2a, Usp24, Rnaseh2b, Usp42, Dnase1l2, Gpc1, Ipcef1, Ptpn3, Nbr1, Gna13, Arap3, Atp7a, Arhgap1, Ppp1cb, Tbck, Dock7, Adap2, Ubr5, Tbc1d5, Smg1, Rbbp8, Rbck1, Lsm1, Ahsa1, Gnl2, Fnbp1l, Ralgapb, Ppp2r5c, Nub1, Fbxw11, Arfgap1, Arap2, Gsk3b, Arhgap27, Mpo, Shmt1, Gnas, Top2a, Top1, Rab3a, Rab21, Etf1, Bdh2, Hdac4, Apob…
GO:0051649	establishment of localiza	0.07612 ( 176 of 2312 genes )	0.03878 ( 1319 of 34011 annotated genes )	7.775e-19	2.731e-15	Apbb1, Gga1, Arl4c, Tacc3, Prkcb, Pam, Ift46, Fzd7, Cacna1h, Rab13, Scarb2, Casq2, Nup214, Ap2a1, Adora2b, Rab2a, Agtr1a, Xbp1, Stx5a, Adrbk1, Exoc5, Sun2, Flna, Anxa1, Cog2, Pex14, Copb1, Pim3, Nup160, Exoc3, Ap2b1, Scfd2, Sdccag1, Nxf1, Rps28, Trim36, Hyal2, Tgfbr1, Ubr5, Myo6, Bhlha15, Nup107, Rbck1, Ccl5, Hmgn3, Fbxw11, Cd74, Abcg1, Gm885, Arhgap21, Pclo, Creb1, Traf2, Cdc42bpa, Gsk3b, Inhba,…
GO:0032501	multicellular organismal	0.23746 ( 549 of 2312 genes )	0.17218 ( 5856 of 34011 annotated genes )	2.69e-18	9.451e-15	Megf11, Apbb1, Erbb3, Aff3, Map2k3, Cald1, Olfr613, Gria4, Disc1, Olfr459, Dnmt3a, Unc45a, Slc12a1, Zp3r, Myl3, Atp1a4, Olfr1298, Olfr281, Adrbk1, Ush1c, Usp42, Pdilt, Flna, Anxa1, Sulf2, Mcoln3, Dixdc1, Duox1, Ssh3, Ap2b1, Fgfr1, Tdrd9, Enpep, Hyal2, Tgfbr1, Tcfcp2l1, Gas2l1, Rbbp8, Itgb3, Olfm1, Diap2, Scn3a, Smarcc1, Bsnd, Il12a, Dmrt1, Cd74, Myh2, Chrnd, Lama2, Traf2, Clgn, Gsk3b, Inhba, Dst,…
GO:0006468	protein phosphorylation	0.06964 ( 161 of 2312 genes )	0.03487 ( 1186 of 34011 annotated genes )	5.17e-18	1.816e-14	Erbb3, Prkcb, Csnk2a2, Map2k3, Fam129a, Gnb2l1, Trpm6, Fam20c, Ltk, Map3k5, Dbf4, Sdc4, Prkg2, Agtr1a, Adrbk1, Pik3ca, Myo3b, Polr2a, Ccdc88a, Morc3, Pim3, Ccnc, Fnip1, Maged1, Kirrel, Rps6kc1, Fgfr1, Slit2, Dock7, Araf, Hyal2, Tgfbr1, Mark3, Map4k5, Smg1, Ccny, Pde6h, Srms, 1810031K17Rik, St3gal1, Aplp2, Ccl5, Itgb3, Fert2, Il12a, Ccdc88c, Cd74, Cdk15, Map4k4, Creb1, Traf2, Cdc42bpa, Gsk3b, Inhb…
GO:0048513	organ development	0.10986 ( 254 of 2312 genes )	0.06501 ( 2211 of 34011 annotated genes )	5.379e-18	1.89e-14	Megf11, Erbb3, Pparg, Tacc3, Boc, Sp3, Frzb, Disc1, Birc6, Eif2b4, Fzd7, Msh2, Fam20c, Unc45a, Slc12a1, Kcnma1, Trp53bp2, Dmd, Myl3, Lgals8, Mov10l1, Agtr1a, Xbp1, Adrbk1, Ush1c, Rbfox2, Flna, Anxa1, Sulf2, Psap, Atrx, Mcoln3, Dixdc1, Col11a1, Nbr1, Maged1, Dscam, Tnfrsf19, Fgfr1, Smyd1, Mef2d, H2-K1, Otx1, Atp7a, Lect1, Nipbl, Slit2, Eomes, Adap2, Hoxa3, Itga8, Tgfbr1, Tcfcp2l1, Myo6, Gas2l1, Ig…
GO:0030030	cell projection organizat	0.05147 ( 119 of 2312 genes )	0.02276 ( 774 of 34011 annotated genes )	1.316e-17	4.622e-14	Apbb1, Ift122, Unc5b, Mycbp2, Boc, Asap1, Disc1, Tctn3, Areg, Mink1, Ift46, Fzd7, Camk2b, 2400003C14Rik, Ltk, Ptprd, Als2cr4, Atl1, Ptprf, Dmd, Nfib, Tnfrsf12a, Tbr1, Tsc1, Arl3, Myo3b, Flna, Ccdc88a, Sema4a, Efnb1, Dixdc1, Ttll1, Arhgap42, Rp1l1, Dscam, Ssh3, Kalrn, Fgfr1, Dclk1, Atp7a, Slit2, Nefl, Dock7, Rgnef, Dync2h1, Itga8, Tgfbr1, Prmt1, Tulp1, Evl, Myo6, Pxn, Ptprz1, Ankrd1, Ccl5, Itgb3, …
GO:0007010	cytoskeleton organization	0.04758 ( 110 of 2312 genes )	0.02073 ( 705 of 34011 annotated genes )	7.836e-17	2.753e-13	Ino80, Brca2, Mycbp2, Pard3, Pdgfra, Tacc3, Pam, Kif2a, Atxn7, Cald1, Disc1, Cntrob, Mink1, Ift46, Mark4, Cep68, Sdc4, Hsp90b1, Tsc1, Espl1, Ush1c, Flii, Limch1, Sun2, Dctn2, Flna, Rgs14, Sgol1, Ccdc88a, Pex14, Dixdc1, Ttll1, Map3k1, Ssh3, Kirrel, Jmy, Sac3d1, Slit2, Coro2a, Nefl, Inpp5k, Dock7, Rgnef, Aqp2, Evl, Pxn, Gas2l1, Hook3, Eln, Arpc2, Diap2, Fert2, Ccdc88c, Tpm1, Sgcz, Vasp, Pclo, Ranbp…
GO:0051246	regulation of protein met	0.06834 ( 158 of 2312 genes )	0.03508 ( 1193 of 34011 annotated genes )	1.04e-16	3.652e-13	Erbb3, Ctcf, Map2k3, Brd7, Disc1, Fam129a, Eif2b4, Gnb2l1, Eif4e, Map3k5, Aco1, Sdc4, Agtr1a, Pik3ca, Flna, Ccdc88a, Ptpn3, Asb9, Ccnc, Fnip1, Maged1, Kirrel, Fgfr1, Igf2bp1, Eif4g2, Nipbl, Slit2, Fktn, Dock7, Araf, Hyal2, Tgfbr1, Lsm14a, Ccny, Pde6h, 1810031K17Rik, Aplp2, Ccl5, Itgb3, Serpinb12, Fert2, Il12a, Ccdc88c, Nub1, Fbxw11, Cd74, Eif4e3, Dedd, Traf2, Gsk3b, Inhba, Serpine2, Eid1, Pum1, G…
GO:0006950	response to stress	0.10078 ( 233 of 2312 genes )	0.05977 ( 2033 of 34011 annotated genes )	1.973e-16	6.932e-13	Terf2ip, Apbb1, Ino80, Pparg, Tacc3, Map2k3, Fam129a, Ninj1, Eif2b4, Pygm, Fzd7, Msh2, Kcnma1, Pms2, Map3k5, Scn9a, Adora2b, Agtr1a, Xbp1, Adrbk1, Scara5, Anxa1, Atrx, Dixdc1, Rps3, Nbr1, Dnaja2, Gna13, Faf2, H2-K1, Igf2bp1, Atp7a, Nipbl, Slit2, Nlrc5, Fktn, Hyal2, Aqp2, Evl, Ubr5, Myo6, Map4k5, Gas2l1, Nlrx1, Smg1, Rbbp8, Setd8, Ahsa1, Ccl5, Itgb3, Lias, Fert2, Alb, Atad5, Il12a, Ppp2r5c, Cd74, …
GO:0007155	cell adhesion	0.05147 ( 119 of 2312 genes )	0.02358 ( 802 of 34011 annotated genes )	2.016e-16	7.081e-13	Megf11, Pcdhb22, Erbb3, Pard3, Pdgfra, Igsf5, Abi3bp, Nrg1, Boc, Disc1, Ephb4, Ninj1, Mink1, Fzd7, Otog, Amelx, Plekha2, Tro, Ptprd, Hapln2, Scarb2, Ptprf, Sdc4, Cd99l2, Tnfrsf12a, Plekha7, Tsc1, Lpp, Edil3, Fat3, Itga10, Itgb7, Col11a1, Cd84, Dscam, Kirrel, Slit2, Klf4, Amtn, Ppp1cb, Izumo1, Itga8, Vwa2, Pcdh17, Pxn, Clstn2, Postn, Lmo7, Dscaml1, Ccl5, Itgb3, Ptpru, Fert2, Pcdhb15, Cdh23, Cd2ap,…
GO:0045184	establishment of protein	0.06228 ( 144 of 2312 genes )	0.03111 ( 1058 of 34011 annotated genes )	2.563e-16	9.005e-13	Apbb1, Gga1, Pparg, Tacc3, Pam, Ift46, Fzd7, Gnb2l1, Rab13, Scarb2, Nup214, Ap2a1, Rab2a, Agtr1a, Stx5a, Exoc5, Flna, Anxa1, Cog2, Pex14, Copb1, Nup160, Exoc3, Ap2b1, Scfd2, Itga8, Hyal2, Tgfbr1, Snx7, Ubr5, Nup93, Myo6, Vps25, Nup107, Rbck1, Rab33a, Myo5b, Fbxw11, Cd74, Abcg1, Arfgap1, Traf2, Gsk3b, Erc1, Tnpo1, Rpain, Rab3a, Rab21, Faf1, Nasp, Sytl2, Apob, Nop58, Vps4a, Vps52, Os9, Ppp1r3c, Itg…
GO:0044281	small molecule metabolic	0.10467 ( 242 of 2312 genes )	0.06304 ( 2144 of 34011 annotated genes )	2.911e-16	1.023e-12	Ino80, Pparg, Ctcf, Kif20b, Pam, Msh2, Rras, Gnb2l1, Dnmt3a, Umps, Atp2a2, Rab13, Apip, Aco1, Atp1a4, Adora2b, Atf7ip, Gnpda2, Rab2a, Slc27a5, Kdm2a, Fmo1, Pank1, Pik3ca, Flna, Anxa1, Ipcef1, Car8, Adssl1, Cdipt, Ocln, Tmx3, Gna13, Arap3, Atp7a, Lars, Hnmt, Arhgap1, 6430573F11Rik, Ppp1cb, Tbck, Dock7, Tdrd9, Adap2, Dot1l, Tbc1d5, Pdss1, Mpp6, Setd8, Aplp2, Ahsa1, Lias, Gnl2, Dhcr7, 4832428D23Rik,…
GO:0051049	regulation of transport	0.06012 ( 139 of 2312 genes )	0.02964 ( 1008 of 34011 annotated genes )	2.941e-16	1.033e-12	Apbb1, Erbb3, Tacc3, Trpm4, Prkcb, Pam, Fzd7, Cacna1h, Gnb2l1, Kcnma1, Casq2, Scn9a, Adora2b, Agtr1a, Fgf21, Adrbk1, Tpcn1, Flna, Anxa1, Pim3, Slc9a3, Hyal2, Tgfbr1, Aqp2, Ubr5, Myo6, Cacnb3, Rbck1, Ccl5, Itgb3, Hmgn3, Scn3a, Fbxw11, Cd74, Kcnk2, Abcg1, Pclo, Traf2, Creb1, Prtn3, Gsk3b, Inhba, Serpine2, Catsper4, Gnas, Sh3gl2, Rab3a, Faf1, Scyl2, Sytl2, Ppp1r12a, Sgk1, Trpv2, Hsd3b6, Itgb1, Prkci…
GO:0022610	biological adhesion	0.05147 ( 119 of 2312 genes )	0.02376 ( 808 of 34011 annotated genes )	3.536e-16	1.242e-12	Megf11, Pcdhb22, Erbb3, Pard3, Pdgfra, Igsf5, Abi3bp, Nrg1, Boc, Disc1, Ephb4, Ninj1, Mink1, Fzd7, Otog, Amelx, Plekha2, Tro, Ptprd, Hapln2, Scarb2, Ptprf, Sdc4, Cd99l2, Tnfrsf12a, Plekha7, Tsc1, Lpp, Edil3, Fat3, Itga10, Itgb7, Col11a1, Cd84, Dscam, Kirrel, Slit2, Klf4, Amtn, Ppp1cb, Izumo1, Itga8, Vwa2, Pcdh17, Pxn, Clstn2, Postn, Lmo7, Dscaml1, Ccl5, Itgb3, Ptpru, Fert2, Pcdhb15, Cdh23, Cd2ap,…
GO:0048858	cell projection morphogen	0.03633 ( 84 of 2312 genes )	0.01408 ( 479 of 34011 annotated genes )	4.114e-16	1.445e-12	Apbb1, Ift122, Unc5b, Mycbp2, Boc, Asap1, Disc1, Tctn3, Mink1, Fzd7, Camk2b, 2400003C14Rik, Ptprd, Als2cr4, Atl1, Ptprf, Dmd, Nfib, Tnfrsf12a, Tbr1, Arl3, Flna, Sema4a, Efnb1, Dixdc1, Ttll1, Dscam, Ssh3, Kalrn, Dclk1, Atp7a, Slit2, Nefl, Dock7, Rgnef, Dync2h1, Evl, Ptprz1, Itgb3, Lifr, Lama2, Vasp, Creb1, Dst, Gsk3b, Cdk5, Rab3a, Ilk, Sema7a, Pax6, Alcam, Ocrl, Onecut2, Sgk1, Trpv2, Mapt, Rpl24, …
GO:0010604	positive regulation of ma	0.08088 ( 187 of 2312 genes )	0.04501 ( 1531 of 34011 annotated genes )	5.655e-16	1.987e-12	Apbb1, Ino80, Pparg, Ctcf, Sp3, Map2k3, Brd7, Disc1, Fam129a, Fzd7, Gnb2l1, Ciz1, Atf7ip, Agtr1a, Ebf3, Pik3ca, Asb9, Maged1, Fgfr1, Mef2d, Nipbl, Nlrc5, Dock7, Araf, Eomes, Hyal2, Tgfbr1, Khdrbs3, Myo6, Bhlha15, Rbck1, Ccl5, Itgb3, Hmgn3, Smarcc1, Ikzf2, Il12a, Nub1, Fbxw11, Dmrt1, Cd74, Creb1, Gsk3b, Inhba, Sox5, Cdc73, Gnas, Tead1, Top2a, Sox10, Ilk, Scyl2, Ppp1r12a, Hdac4, Med12, Rgmb, Tcfcp2…
GO:0044085	cellular component biogen	0.07742 ( 179 of 2312 genes )	0.04243 ( 1443 of 34011 annotated genes )	5.703e-16	2.003e-12	Ino80, Cenpt, Ctcf, Pam, Cald1, Disc1, Ift46, Gnb2l1, Kcnma1, Rplp0, Sdc4, Atf7ip, Ush1c, Scara5, Gpc1, Myo3b, Flna, Ccdc88a, Pex14, Arhgap42, Nbr1, Ap2b1, Ssh3, Kirrel, Atp7a, Slit2, Rps28, Tgfbr1, Evl, Myo6, Pdss1, Lsm14a, Ccl5, Itgb3, Olfm1, Diap2, Fert2, Gnl2, Fnbp1l, Ccdc88c, Cd74, Gchfr, Vasp, Creb1, Traf2, Clgn, Gsk3b, Dst, Serpine2, Col17a1, Shmt1, Ezr, Celf2, Faf1, Haus6, Ilk, Ighmbp2, O…
GO:0015031	protein transport	0.06012 ( 139 of 2312 genes )	0.02993 ( 1018 of 34011 annotated genes )	6.643e-16	2.334e-12	Apbb1, Gga1, Pparg, Tacc3, Pam, Ift46, Fzd7, Rab13, Scarb2, Nup214, Ap2a1, Rab2a, Agtr1a, Stx5a, Exoc5, Flna, Anxa1, Cog2, Pex14, Copb1, Nup160, Exoc3, Ap2b1, Scfd2, Hyal2, Tgfbr1, Snx7, Ubr5, Nup93, Myo6, Vps25, Nup107, Rbck1, Rab33a, Myo5b, Fbxw11, Cd74, Abcg1, Arfgap1, Traf2, Gsk3b, Erc1, Tnpo1, Rpain, Rab3a, Rab21, Faf1, Nasp, Sytl2, Apob, Nop58, Vps4a, Vps52, Os9, Ppp1r3c, Itgb1, Ank1, Naca,…
GO:0032990	cell part morphogenesis	0.03676 ( 85 of 2312 genes )	0.01447 ( 492 of 34011 annotated genes )	6.821e-16	2.396e-12	Apbb1, Ift122, Unc5b, Mycbp2, Boc, Asap1, Disc1, Tctn3, Mink1, Fzd7, Camk2b, 2400003C14Rik, Ptprd, Als2cr4, Atl1, Ptprf, Dmd, Nfib, Tnfrsf12a, Tbr1, Arl3, Flna, Sema4a, Efnb1, Dixdc1, Ttll1, Dscam, Ssh3, Kalrn, Dclk1, Atp7a, Slit2, Nefl, Dock7, Rgnef, Dync2h1, Evl, Ptprz1, Itgb3, Lifr, Lama2, Vasp, Creb1, Dst, Gsk3b, Cdk5, Pnpt1, Rab3a, Ilk, Sema7a, Pax6, Alcam, Ocrl, Onecut2, Sgk1, Trpv2, Mapt, …
GO:0007017	microtubule-based process	0.02984 ( 69 of 2312 genes )	0.01056 ( 359 of 34011 annotated genes )	1.601e-15	5.624e-12	Ino80, Brca2, Pard3, Tacc3, Kif20b, Kif2a, Atxn7, Disc1, Cntrob, Ift46, Mark4, Kif5a, Cep68, Tubb6, Espl1, Arl3, Dnahc10, Dctn2, Flna, Rgs14, Sgol1, Ccdc88a, Pex14, Dixdc1, Ttll1, Dnahc2, Sac3d1, Nefl, Dock7, Dync2h1, Hook3, Gas2l1, Fert2, Kif5b, Ccdc88c, Arhgap21, Dnaic1, Cdc42bpa, Tubb4, Ranbp10, Chordc1, Dst, Gsk3b, Spast, Ccdc52, Cltc, Macf1, Haus6, Son, Ppp1r12a, Kif24, Sgk1, Mapt, Mybl2, Tt…
GO:0032989	cellular component morpho	0.04715 ( 109 of 2312 genes )	0.02140 ( 728 of 34011 annotated genes )	2.025e-15	7.113e-12	Apbb1, Ift122, Unc5b, Mycbp2, Pard3, Pdgfra, Nrg1, Boc, Asap1, Disc1, Tctn3, Mink1, Fzd7, Camk2b, 2400003C14Rik, Ptprd, Als2cr4, Atl1, Ptprf, Dmd, Nfib, Tnfrsf12a, Tbr1, Arl3, Gpc1, Flna, Sema4a, Efnb1, Dixdc1, Ttll1, Ppp3r1, Dscam, Ssh3, Kalrn, Dclk1, Atp7a, Lect1, Slit2, Nefl, Dock7, Eomes, Rgnef, Dync2h1, Tgfbr1, Tcfcp2l1, Evl, Ptprz1, Itgb3, Fert2, Cdh23, Lifr, Pofut2, Tpm1, Gnpat, Dmrt1, Lam…
GO:0032268	regulation of cellular pr	0.06185 ( 143 of 2312 genes )	0.03178 ( 1081 of 34011 annotated genes )	3.484e-15	1.224e-11	Erbb3, Ctcf, Map2k3, Brd7, Disc1, Fam129a, Eif2b4, Gnb2l1, Eif4e, Map3k5, Aco1, Sdc4, Agtr1a, Pik3ca, Ccdc88a, Ptpn3, Ccnc, Fnip1, Maged1, Kirrel, Fgfr1, Igf2bp1, Eif4g2, Nipbl, Slit2, Fktn, Dock7, Araf, Hyal2, Tgfbr1, Lsm14a, Ccny, Pde6h, 1810031K17Rik, Aplp2, Ccl5, Itgb3, Fert2, Il12a, Ccdc88c, Nub1, Fbxw11, Cd74, Eif4e3, Traf2, Gsk3b, Inhba, Serpine2, Eid1, Pum1, Gnas, Map2k2, Ilk, Gab1, Hdac4…
GO:0031325	positive regulation of ce	0.08088 ( 187 of 2312 genes )	0.04593 ( 1562 of 34011 annotated genes )	3.999e-15	1.405e-11	Apbb1, Ino80, Pparg, Ctcf, Sp3, Map2k3, Brd7, Disc1, Fam129a, Fzd7, Gnb2l1, Ciz1, Adora2b, Atf7ip, Agtr1a, Ebf3, Pik3ca, Anxa1, Ipcef1, Itsn1, Maged1, Dscam, Fgfr1, Mef2d, Nipbl, Nlrc5, Dock7, Araf, Eomes, Hyal2, Tgfbr1, Khdrbs3, Myo6, Bhlha15, Rbck1, Ccl5, Itgb3, Hmgn3, Smarcc1, Ikzf2, Il12a, Nub1, Fbxw11, Dmrt1, Cd74, Creb1, Gsk3b, Inhba, Sox5, Cdc73, Gnas, Tead1, Top2a, Sox10, Ilk, Scyl2, Ppp1…
GO:0009893	positive regulation of me	0.08521 ( 197 of 2312 genes )	0.04934 ( 1678 of 34011 annotated genes )	4.933e-15	1.733e-11	Apbb1, Ino80, Pparg, Ctcf, Sp3, Map2k3, Brd7, Disc1, Fam129a, Fzd7, Gnb2l1, Ciz1, Adora2b, Atf7ip, Agtr1a, Ebf3, Pik3ca, Anxa1, Ipcef1, Itsn1, Asb9, Maged1, Dscam, Fgfr1, Mef2d, Nipbl, Nlrc5, Dock7, Araf, Eomes, Hyal2, Tgfbr1, Khdrbs3, Myo6, Bhlha15, Rbck1, Ccl5, Itgb3, Hmgn3, Smarcc1, Ikzf2, Il12a, Nub1, Fbxw11, Dmrt1, Cd74, Abcg1, Creb1, Gsk3b, Inhba, Sox5, Cdc73, Gnas, Tead1, Top2a, Sox10, Ilk…
GO:0048699	generation of neurons	0.05493 ( 127 of 2312 genes )	0.02708 ( 921 of 34011 annotated genes )	5.911e-15	2.076e-11	Apbb1, Unc5b, Mycbp2, Pparg, Nrg1, Boc, Tulp3, Disc1, Areg, Mink1, Fzd7, Camk2b, 2400003C14Rik, Ltk, Ptprd, Kcnma1, Atl1, Ptprf, Dmd, Nfib, Tnfrsf12a, Tbr1, Spag9, Arl3, Ush1c, Rgs14, Ccdc88a, Sema4a, Mcoln3, Efnb1, Dixdc1, Rp1l1, Irx3, Dscam, Ssh3, Kalrn, Fgfr1, Dclk1, Atp7a, Slit2, Frs2, Fktn, Nefl, Dock7, Eomes, Rgnef, Tgfbr1, Prmt1, Tulp1, Evl, Myo6, Hook3, Trp73, Ptprz1, Ankrd1, Ccl5, Htr7, …
GO:0040011	locomotion	0.05709 ( 132 of 2312 genes )	0.02864 ( 974 of 34011 annotated genes )	6.566e-15	2.307e-11	Apbb1, Mycbp2, Trpm4, Boc, Disc1, Ift46, Elmo2, Rras, Gnb2l1, Krit1, Atp1a4, Sun2, Ccdc88a, Dixdc1, Scg2, Gna13, Dscam, Arap3, Fgfr1, Slit2, Fktn, Enpep, Hyal2, Tgfbr1, Evl, Ccl5, Itgb3, Ptpru, Fert2, Il12a, Dmrt1, Cd74, Lama2, Vasp, Cdc42bpa, Gsk3b, Vash1, Dst, Catsper4, Map2k2, Sox10, Ccdc135, Ilk, Figf, Gab1, Apob, Rpl24, Arhgef7, Nav1, Fermt1, Itgb1, Prkci, Ryk, Itgb4, Etv1, Reln, Slc9a3r1, C…
GO:0007049	cell cycle	0.06272 ( 145 of 2312 genes )	0.03281 ( 1116 of 34011 annotated genes )	9.727e-15	3.417e-11	Apbb1, Ino80, Cenpt, Tacc3, Kif20b, Csnk2a2, Kif2a, Brd7, Birc6, Cdc5l, Cntrob, Msh2, Gnb2l1, 2400003C14Rik, Eif4e, Trp53bp2, Anp32b, Pms2, Nup214, Dbf4, Mov10l1, Pds5a, Ush1c, Dctn2, Flna, Anxa1, Sgol1, Ptpn3, Pim3, Dixdc1, Ccnc, Fgfr1, Nipbl, Ppp1cb, Tdrd9, 4933424B01Rik, Ccar1, Chtf18, Gas2l1, Ccny, Rbbp8, 1810031K17Rik, Setd8, Fert2, Incenp, Il12a, Ppp2r5c, Fbxw11, Dmrt1, Clgn, Gsk3b, Inhba, …
GO:0046907	intracellular transport	0.04931 ( 114 of 2312 genes )	0.02337 ( 795 of 34011 annotated genes )	1.003e-14	3.523e-11	Gga1, Arl4c, Pard3, Tacc3, D6Wsu116e, Ift46, Fzd7, Abca2, Pex26, Rab13, Scarb2, Casq2, Nup214, Ap2a1, Rab2a, Tsc1, Ankrd54, Spag9, Stx5a, Arl3, Gnptg, Tom1l2, Plcb3, Hsp90ab1, Flna, Rgs14, Cog2, Pex14, Copb1, Rab6, Rph3a, Ppp3r1, Nup160, Ppp3ca, Ap2b1, Pikfyve, Sdccag1, Kpna4, Nbea, Nxf1, Rps28, Nefl, Inpp5k, Hyal2, Tgfbr1, Ahcyl1, Ubr5, Myo6, Hook3, Bhlha15, Nup107, Rbck1, Ryr1, Kif5b, Rab1, Ap3…
GO:0009790	embryo development	0.05580 ( 129 of 2312 genes )	0.02799 ( 952 of 34011 annotated genes )	1.36e-14	4.778e-11	Aff3, Sp3, Frzb, Birc6, Fzd7, Msh2, Gnb2l1, Dnmt3a, Trp53bp2, Ush1c, Sulf2, Col11a1, Gna13, Fgfr1, Otx1, Nipbl, Slit2, Eomes, Hoxa3, Itga8, Tgfbr1, Myo6, Rbbp8, Aplp2, Lias, Cdh23, Fbxw4, Pofut2, Scel, Vasp, Inhba, Sox5, Cdc73, Dnmt3l, Jag2, Gnas, Top2a, Tead1, Top1, G2e3, Sox10, Sobp, Nasp, Rps6ka6, Gab1, Ocrl, Ext2, Apob, Bat3, Med12, Ube2a, Zfp238, Vcam1, Xab2, Cr1l, Itgb1, Gins1, Ift172, Mycn…
GO:0022008	neurogenesis	0.05709 ( 132 of 2312 genes )	0.02896 ( 985 of 34011 annotated genes )	1.558e-14	5.472e-11	Apbb1, Mycbp2, Erbb3, Pparg, Tacc3, Boc, Disc1, Eif2b4, Fzd7, 2400003C14Rik, Ltk, Kcnma1, Dmd, Ush1c, Gpc1, Ccdc88a, Mcoln3, Dixdc1, Rp1l1, Dscam, Ssh3, Fgfr1, Atp7a, Slit2, Fktn, Dock7, Eomes, Rgnef, Tgfbr1, Evl, Myo6, Ptprz1, Ccl5, Cdh23, Lama2, Vasp, Creb1, Gsk3b, Sox5, Dst, Serpine2, Sox10, Rab3a, Ilk, Ighmbp2, Cnga3, Bnip2, Sgk1, Trpv2, Rpl24, Arhgef7, Zfp238, Nav1, Itgb1, Prkci, Ryk, Etv1, …
GO:0022607	cellular component assemb	0.06964 ( 161 of 2312 genes )	0.03831 ( 1303 of 34011 annotated genes )	2.557e-14	8.983e-11	Ino80, Cenpt, Ctcf, Pam, Cald1, Disc1, Ift46, Gnb2l1, Kcnma1, Sdc4, Atf7ip, Ush1c, Scara5, Gpc1, Myo3b, Flna, Ccdc88a, Pex14, Arhgap42, Nbr1, Ap2b1, Ssh3, Kirrel, Atp7a, Slit2, Tgfbr1, Evl, Myo6, Pdss1, Lsm14a, Ccl5, Itgb3, Olfm1, Diap2, Fert2, Fnbp1l, Ccdc88c, Cd74, Gchfr, Vasp, Traf2, Creb1, Clgn, Gsk3b, Dst, Col17a1, Shmt1, Ezr, Celf2, Faf1, Haus6, Ilk, Ighmbp2, Ocrl, Sgk1, Bat3, Rpl24, Itgb1,…
GO:0016192	vesicle-mediated transpor	0.04801 ( 111 of 2312 genes )	0.02282 ( 776 of 34011 annotated genes )	2.684e-14	9.428e-11	Gga1, Arl4c, D10Bwg1379e, D6Wsu116e, Elmo2, Cacna1h, Gnb2l1, Cdc42se2, Ap2a1, Adora2b, Rab2a, Gtf2h2, Spag9, Stx5a, Adrbk1, Exoc5, Scara5, Plcb3, Flna, Anxa1, Cog2, Copb1, Rab6, Itsn1, Rspo1, Havcr1, Exoc3, Mrc2, Ap2b1, Pikfyve, Scfd2, Arf2, Nbea, Mical3, Trim36, Slc9a3, Tulp1, Myo6, Fkbp15, Hook3, Ccl5, Cd2ap, Myo5b, Rab1, Ap3b2, Fnbp1l, Mib1, Usp20, Lyn, Lrp2, Tac4, Pi4k2a, Gm885, Eps15l1, Ankf…
GO:0030182	neuron differentiation	0.05017 ( 116 of 2312 genes )	0.02443 ( 831 of 34011 annotated genes )	3.896e-14	1.369e-10	Apbb1, Unc5b, Mycbp2, Nrg1, Boc, Tulp3, Disc1, Areg, Mink1, Fzd7, Camk2b, 2400003C14Rik, Ltk, Ptprd, Kcnma1, Atl1, Ptprf, Dmd, Nfib, Tnfrsf12a, Tbr1, Spag9, Arl3, Ush1c, Ccdc88a, Sema4a, Mcoln3, Efnb1, Dixdc1, Rp1l1, Irx3, Dscam, Ssh3, Kalrn, Fgfr1, Dclk1, Atp7a, Slit2, Nefl, Dock7, Eomes, Rgnef, Tgfbr1, Prmt1, Tulp1, Evl, Myo6, Trp73, Ptprz1, Ankrd1, Ccl5, Htr7, Cdh23, Lifr, Mib1, Lyn, Dnmt3b, L…
GO:0000902	cell morphogenesis	0.04325 ( 100 of 2312 genes )	0.01973 ( 671 of 34011 annotated genes )	3.987e-14	1.401e-10	Apbb1, Ift122, Unc5b, Mycbp2, Pard3, Nrg1, Boc, Asap1, Disc1, Tctn3, Mink1, Fzd7, Camk2b, 2400003C14Rik, Ptprd, Als2cr4, Atl1, Ptprf, Dmd, Nfib, Tnfrsf12a, Tbr1, Arl3, Flna, Sema4a, Efnb1, Dixdc1, Ttll1, Ppp3r1, Dscam, Ssh3, Kalrn, Dclk1, Atp7a, Lect1, Slit2, Nefl, Dock7, Eomes, Rgnef, Dync2h1, Tgfbr1, Tcfcp2l1, Evl, Ptprz1, Itgb3, Fert2, Cdh23, Lifr, Pofut2, Dmrt1, Lama2, Vasp, Creb1, Cdk5, Dst,…
GO:0051239	regulation of multicellul	0.08824 ( 204 of 2312 genes )	0.05281 ( 1796 of 34011 annotated genes )	4.305e-14	1.512e-10	Apbb1, Pparg, Trpm4, Prkcb, Boc, Map2k3, Cald1, Frzb, Gria4, Disc1, Fzd7, Rras, Krit1, 2400003C14Rik, Tnks2, Fam20c, Ltk, Atp2a2, Kcnma1, Casq2, Myl3, Adora2b, Agtr1a, Adrbk1, Pik3ca, Rbfox2, Sulf2, Ccdc88a, Dixdc1, Nbr1, Maged1, Dscam, Ssh3, Fgfr1, Lect1, Nipbl, Slit2, Eomes, Hyal2, Tgfbr1, Myo6, Gas2l1, Ccl5, Itgb3, Alb, Pofut2, Il12a, Cd74, Lama2, Il7, Creb1, Traf2, Gsk3b, Inhba, Vash1, Sox5, …
GO:0072523	purine-containing compoun	0.03503 ( 81 of 2312 genes )	0.01450 ( 493 of 34011 annotated genes )	5.669e-14	1.991e-10	Ino80, Rgs9, Rasgrp3, Kif20b, Msh2, Rras, Gnb2l1, Abca2, Atp2a2, Cpeb2, Rab13, Atl1, Atp1a4, Tubb6, Atf7ip, Rab2a, Tsc1, Tbc1d9, Abca4, Aldob, Rgs14, Ipcef1, Mx1, Rab6, Gna13, Arap3, Atp7a, Tbc1d20, Gmpr2, Arhgap1, Tbck, Dock7, Adap2, Clpx, Tbc1d5, Gda, Ralgapa1, Ahsa1, Gnl2, Asap3, Pde4b, Ralgapb, Pde11a, Sgsm3, Tpm1, Arfgap1, Tubb4, Atp5j2, Arap2, Wrn, Gsk3b, Arhgap27, Nras, Ide, Gnas, Top2a, T…
GO:0006812	cation transport	0.04455 ( 103 of 2312 genes )	0.02076 ( 706 of 34011 annotated genes )	6.572e-14	2.309e-10	Slc39a14, Trpm4, Prkcb, Dpp6, Jsrp1, Cacna1h, Catsper2, Slc22a1, Trpm6, Camk2b, Slc12a1, Mchr1, Atp2a2, Kcnma1, Casq2, Slc47a1, Atp1a4, Scn9a, Tsc1, Scn4a, Tpcn1, Plcg1, Atp13a4, Scara5, Catsper1, Tmem66, Slc10a2, Slc38a4, Ppp3ca, Kcnu1, Atp7a, Cacna1s, Inpp5k, Slc9a3, Slc5a7, Slc4a8, Slc22a21, Aqp2, Ahcyl1, Slc1a1, Bhlha15, Cacnb3, Gcg, Ccl5, Fam38b, Ryr1, Cdh23, Cngb3, Scn3a, Lyn, Slc9a5, Slc34…
GO:0006195	purine nucleotide catabol	0.03460 ( 80 of 2312 genes )	0.01429 ( 486 of 34011 annotated genes )	7.31e-14	2.568e-10	Ino80, Rgs9, Rasgrp3, Kif20b, Msh2, Rras, Gnb2l1, Abca2, Atp2a2, Cpeb2, Rab13, Atl1, Atp1a4, Tubb6, Atf7ip, Rab2a, Tsc1, Tbc1d9, Abca4, Aldob, Rgs14, Ipcef1, Mx1, Rab6, Gna13, Arap3, Atp7a, Tbc1d20, Gmpr2, Arhgap1, Tbck, Dock7, Adap2, Clpx, Tbc1d5, Ralgapa1, Ahsa1, Gnl2, Asap3, Pde4b, Ralgapb, Pde11a, Sgsm3, Tpm1, Arfgap1, Tubb4, Atp5j2, Arap2, Wrn, Gsk3b, Arhgap27, Nras, Ide, Gnas, Top2a, Top1, …
GO:0007264	small GTPase mediated sig	0.03503 ( 81 of 2312 genes )	0.01473 ( 501 of 34011 annotated genes )	1.381e-13	4.852e-10	Arl4c, Rasgrp3, Nrg1, D10Bwg1379e, Plekhg6, Rras, Rab13, Usp8, Obscn, Rab2a, Tsc1, Tbc1d9, Arl3, Rab6, Itsn1, Gna13, Kalrn, Arap3, Rasgef1b, Arf2, Tbc1d20, Slit2, Arhgap1, Eps8l1, Dnajc27, Tbck, Dock7, Rgnef, Adap2, Rab28, Tbc1d5, Arhgef1, Ralgapa1, Rab33a, Rasgrp2, Asap3, Rab1, Ralgapb, Sgsm3, Arfgap1, Cdc42bpa, Arap2, Gsk3b, Arhgap27, Nras, Psd3, Dbnl, Mcf2l, Abr, Rab20, Rab21, Rab3a, Arhgef15,…
GO:0006928	cellular component moveme	0.05017 ( 116 of 2312 genes )	0.02496 ( 849 of 34011 annotated genes )	1.713e-13	6.017e-10	Apbb1, Tns1, Pard3, Pdgfra, Trpm4, Nrg1, Disc1, Ephb4, Mink1, Ift46, Elmo2, Rras, Gnb2l1, Krit1, Catsper2, Atp1a4, Tnfrsf12a, Spag9, Plcg1, Sun2, Hc, Catsper1, Ccdc88a, Strbp, Itgb7, Sema4a, Efnb1, Dixdc1, Scg2, Ttll1, Map3k1, Gna13, Dscam, Msn, Arap3, Fgfr1, Jmy, Dclk1, Slit2, Klf4, Fktn, Enpep, Hyal2, Tgfbr1, Pxn, Ccl5, Itgb3, Ptpru, Fert2, Cd2ap, Pde4b, Lyn, Il12a, Dmrt1, Cd74, Uts2, Dnaic1, C…
GO:0048468	cell development	0.07050 ( 163 of 2312 genes )	0.03993 ( 1358 of 34011 annotated genes )	2.084e-13	7.322e-10	Apbb1, Mycbp2, Pparg, Boc, Frzb, Disc1, Eif2b4, Fzd7, Msh2, 2400003C14Rik, Ltk, Kcnma1, Dmd, Xbp1, Flna, Sulf2, Ccdc88a, Strbp, Dixdc1, Col11a1, Rp1l1, Dscam, Ssh3, Fgfr1, Atp7a, Lect1, Nipbl, Slit2, Dock7, Eomes, Rgnef, Tgfbr1, Tcfcp2l1, Evl, Myo6, Bhlha15, Ptprz1, Ccl5, Fert2, Cdh23, Pofut2, Lama2, Vasp, Creb1, Gsk3b, Dst, Sox5, Serpine2, Cdc73, Sox10, Rab3a, Ilk, Hdac4, Cnga3, Bnip2, Sgk1, Trp…
GO:0051716	cellular response to stim	0.21799 ( 504 of 2312 genes )	0.16486 ( 5607 of 34011 annotated genes )	2.211e-13	7.766e-10	Terf2ip, Apbb1, Erbb3, Pparg, Prkcb, Boc, Arhgap11a, Map2k3, Brd7, Olfr613, Gria4, Disc1, Fam129a, Eif2b4, Olfr459, Clec1b, Gnb2l1, Tnks2, Dnmt3a, Olfr1298, Ppp1r1a, Xbp1, Olfr281, Gpr64, Fgf21, Adrbk1, Scara5, Pik3ca, Flna, Anxa1, Itga10, Sulf2, Dkk2, Pim3, Asb9, Dixdc1, Rps3, Duox1, Arhgap42, Nbr1, Maged1, Gna13, Gpr82, Arap3, Fgfr1, Rasgef1b, Gpr153, Atp7a, Lect1, Slit2, Arhgap1, Nlrc5, Dnajc2…
GO:0007154	cell communication	0.08694 ( 201 of 2312 genes )	0.05298 ( 1802 of 34011 annotated genes )	3.827e-13	1.345e-09	Terf2ip, Erbb3, Pparg, Trpm4, Prkcb, Frzb, Gria4, Disc1, Eif2b4, Tnks2, Ltk, Kcnma1, Casq2, Dmd, Scn9a, Adora2b, Xbp1, Fgf21, Adrbk1, Gpc1, Flna, Anxa1, Sulf2, Dkk2, Pim3, Itsn1, Dixdc1, Nbr1, Ap2b1, Arap3, Tnfrsf19, Rps6kc1, Fgfr1, Lect1, Slit2, Hnmt, Nlrc5, Fktn, Itga8, Hyal2, Tgfbr1, Aqp2, Snx7, Ubr5, Myo6, Gas2l1, Bhlha15, Pde6h, Rbck1, Ccl5, Itgb3, Fert2, Hmgn3, Scn3a, Alb, Il12a, Cd74, Lama…
GO:0072521	purine-containing compoun	0.04542 ( 105 of 2312 genes )	0.02205 ( 750 of 34011 annotated genes )	5.344e-13	1.878e-09	Ino80, Rgs9, Ndufs1, Rasgrp3, Kif20b, Msh2, Rras, Gnb2l1, Abca2, Dnmt3a, Atp2a2, Cpeb2, Rab13, Atl1, Atp1a4, Adora2b, Tubb6, Atf7ip, Rab2a, Tsc1, Tbc1d9, Abca4, Grm3, Aldob, Pank1, Flna, Rgs14, Mx1, Ipcef1, Rab6, Adssl1, Ocln, Gna13, Arap3, Atp7a, Tbc1d20, Gmpr2, Arhgap1, Tbck, Dock7, Adap2, Clpx, Tbc1d5, Gcg, Gda, Ralgapa1, Ahsa1, Htr7, Gnl2, Asap3, Pde4b, Aprt, Ralgapb, Pde11a, Sgsm3, Dnmt3b, T…
GO:0034655	nucleobase, nucleoside, n	0.03547 ( 82 of 2312 genes )	0.01547 ( 526 of 34011 annotated genes )	7.215e-13	2.534e-09	Ino80, Rgs9, Rasgrp3, Kif20b, Msh2, Rras, Gnb2l1, Abca2, Atp2a2, Cpeb2, Rab13, Atl1, Atp1a4, Tubb6, Atf7ip, Rab2a, Tsc1, Tbc1d9, Abca4, Aldob, Rgs14, Ipcef1, Mx1, Rab6, Gna13, Arap3, Atp7a, Tbc1d20, Gmpr2, Arhgap1, Tbck, Dock7, Adap2, Clpx, Tbc1d5, Gda, Ralgapa1, Ahsa1, Gnl2, Asap3, Pde4b, Ralgapb, Pde11a, Sgsm3, Tpm1, Arfgap1, Tubb4, Atp5j2, Arap2, Wrn, Gsk3b, Arhgap27, Nras, Ide, Gnas, Top2a, T…
GO:0034656	nucleobase, nucleoside an	0.03547 ( 82 of 2312 genes )	0.01547 ( 526 of 34011 annotated genes )	7.215e-13	2.534e-09	Ino80, Rgs9, Rasgrp3, Kif20b, Msh2, Rras, Gnb2l1, Abca2, Atp2a2, Cpeb2, Rab13, Atl1, Atp1a4, Tubb6, Atf7ip, Rab2a, Tsc1, Tbc1d9, Abca4, Aldob, Rgs14, Ipcef1, Mx1, Rab6, Gna13, Arap3, Atp7a, Tbc1d20, Gmpr2, Arhgap1, Tbck, Dock7, Adap2, Clpx, Tbc1d5, Gda, Ralgapa1, Ahsa1, Gnl2, Asap3, Pde4b, Ralgapb, Pde11a, Sgsm3, Tpm1, Arfgap1, Tubb4, Atp5j2, Arap2, Wrn, Gsk3b, Arhgap27, Nras, Ide, Gnas, Top2a, T…
GO:0009166	nucleotide catabolic proc	0.03460 ( 80 of 2312 genes )	0.01494 ( 508 of 34011 annotated genes )	8.033e-13	2.822e-09	Ino80, Rgs9, Rasgrp3, Kif20b, Msh2, Rras, Gnb2l1, Abca2, Atp2a2, Cpeb2, Rab13, Atl1, Atp1a4, Tubb6, Atf7ip, Rab2a, Tsc1, Tbc1d9, Abca4, Aldob, Rgs14, Ipcef1, Mx1, Rab6, Gna13, Arap3, Atp7a, Tbc1d20, Gmpr2, Arhgap1, Tbck, Dock7, Adap2, Clpx, Tbc1d5, Ralgapa1, Ahsa1, Gnl2, Asap3, Pde4b, Ralgapb, Pde11a, Sgsm3, Tpm1, Arfgap1, Tubb4, Atp5j2, Arap2, Wrn, Gsk3b, Arhgap27, Nras, Ide, Gnas, Top2a, Top1, …
GO:0051174	regulation of phosphorus	0.04931 ( 114 of 2312 genes )	0.02493 ( 848 of 34011 annotated genes )	8.197e-13	2.88e-09	Erbb3, Lmtk3, Pdgfra, Mobkl1a, Nrg1, Atxn7, Map2k3, Fam129a, Areg, Fzd7, Elfn2, Gnb2l1, Dok7, Fam20c, Map3k5, Ptpn6, Rptor, Clspn, Sdc4, Hsp90b1, Agtr1a, Tsc1, Ankrd54, Dgkq, Spag9, Pik3ca, Fabp4, Hsp90ab1, Rgs14, Ccdc88a, Pfkfb2, Itsn1, Map3k1, Ccnc, Fnip1, Maged1, Dscam, Kirrel, Fgfr1, Afap1l2, Atp7a, Eef2k, Slit2, Nlrc5, Frs2, Klf4, Inpp5k, Dock7, Araf, Hyal2, Tgfbr1, Zfp622, Pxn, Fkbp15, Trp7…
GO:0009057	macromolecule catabolic p	0.03806 ( 88 of 2312 genes )	0.01723 ( 586 of 34011 annotated genes )	8.861e-13	3.113e-09	Skp1a, Nrg1, Rnf103, Disc1, Ube2w, Pygm, Chfr, Gnb2l1, Isg20, Usp8, Psmc3, Hsp90b1, Usp37, Usp24, Ube2d1, Rnaseh2b, Patl1, Usp42, Dnase1l2, Gpc1, Ube3c, Flna, Ptpn3, Usp7, Usp15, Asb9, Map3k1, Cast, Hectd1, Ppp1cb, Ubr1, Hyal2, Ubr5, Clpx, Smg1, Rbbp8, Ppp1r3b, Rbck1, Lsm1, Dcp2, Cd2ap, Usp20, Cul2, Sgsm3, Ppp2r5c, Nub1, Fbxw11, Exosc9, Abcg1, Dedd, Ncbp1, Traf2, Lyve1, Cdk5, Serpine2, Ufd1l, Ide…
GO:0071844	cellular component assemb	0.05147 ( 119 of 2312 genes )	0.02652 ( 902 of 34011 annotated genes )	9.261e-13	3.253e-09	Ino80, Ift122, Cenpt, Tns1, Pard3, Pdgfra, Ctcf, Nrg1, Cald1, Disc1, Ift46, Dok7, Mpp7, Als2cr4, Sdc4, Hsp90b1, Tubb6, Atf7ip, Tsc1, Patl1, Ush1c, Aldob, Gpc1, Myo3b, Flna, Ccdc88a, Baz2a, D6Mm5e, Ttll1, Arhgap42, Map3k1, Ap2b1, Ssh3, Kirrel, Jmy, Sac3d1, Mbnl1, Smarca2, Atp7a, Slit2, Nefl, Fbf1, Inpp5k, Dync2h1, Atg3, Tgfbr1, Evl, Myo6, Fhad1, Pxn, Lsm14a, Eln, Ccl5, Itgb3, Arpc2, Diap2, Fert2, …
GO:0045935	positive regulation of nu	0.06055 ( 140 of 2312 genes )	0.03322 ( 1130 of 34011 annotated genes )	1.096e-12	3.85e-09	Apbb1, Ino80, Pparg, Ctcf, Sp3, Map2k3, Brd7, Fzd7, Ciz1, Adora2b, Atf7ip, Ebf3, Ipcef1, Maged1, Fgfr1, Mef2d, Nlrc5, Eomes, Hyal2, Tgfbr1, Khdrbs3, Myo6, Bhlha15, Rbck1, Hmgn3, Smarcc1, Ikzf2, Fbxw11, Dmrt1, Creb1, Gsk3b, Inhba, Sox5, Cdc73, Gnas, Top2a, Tead1, Sox10, Ilk, Ppp1r12a, Hdac4, Ptgir, Med12, Rgmb, Rxfp2, Tcfcp2, Etv1, Mycn, Ablim2, Wac, Mrpl12, Pias1, Tfb2m, Tada3, Srebf1, Rorb, Crem…
GO:0046700	heterocycle catabolic pro	0.03590 ( 83 of 2312 genes )	0.01591 ( 541 of 34011 annotated genes )	1.249e-12	4.387e-09	Ino80, Rgs9, Rasgrp3, Kif20b, Msh2, Rras, Gnb2l1, Abca2, Atp2a2, Cpeb2, Rab13, Atl1, Atp1a4, Tubb6, Atf7ip, Rab2a, Tsc1, Tbc1d9, Abca4, Aldob, Rgs14, Ipcef1, Mx1, Rab6, Gna13, Arap3, Atp7a, Tbc1d20, Gmpr2, Arhgap1, Tbck, Dock7, Adap2, Clpx, Tbc1d5, Aldh1l1, Gda, Ralgapa1, Ahsa1, Gnl2, Asap3, Pde4b, Ralgapb, Pde11a, Sgsm3, Tpm1, Arfgap1, Tubb4, Atp5j2, Arap2, Wrn, Gsk3b, Arhgap27, Nras, Ide, Gnas,…
GO:0051128	regulation of cellular co	0.05969 ( 138 of 2312 genes )	0.03270 ( 1112 of 34011 annotated genes )	1.414e-12	4.968e-09	Terf2ip, Apbb1, Ino80, Mycbp2, Pparg, Ctcf, Pam, Brd7, Frzb, Disc1, Ift46, Gnb2l1, Tro, 2400003C14Rik, Ltk, Sdc4, Atf7ip, Myo3b, Anxa1, Ccdc88a, Dixdc1, Dscam, Ssh3, Kirrel, Fgfr1, Nipbl, Slit2, Hyal2, Tgfbr1, Evl, Gas2l1, Fert2, Fnbp1l, Pofut2, Dmrt1, Il7, Creb1, Prtn3, Gsk3b, Inhba, Dst, Serpine2, Eid1, Map2k2, Sh3gl2, Rab3a, Faf1, Scyl2, Ilk, Sgk1, Trpv2, Itgb1, Prkci, Ank1, Ryk, Taok1, Doc2b,…
GO:0051254	positive regulation of RN	0.05580 ( 129 of 2312 genes )	0.02984 ( 1015 of 34011 annotated genes )	1.475e-12	5.181e-09	Apbb1, Ino80, Pparg, Ctcf, Sp3, Map2k3, Brd7, Fzd7, Atf7ip, Ebf3, Maged1, Fgfr1, Mef2d, Nlrc5, Eomes, Hyal2, Tgfbr1, Khdrbs3, Myo6, Bhlha15, Rbck1, Hmgn3, Smarcc1, Ikzf2, Fbxw11, Dmrt1, Creb1, Gsk3b, Inhba, Sox5, Cdc73, Top2a, Tead1, Sox10, Ilk, Ppp1r12a, Hdac4, Med12, Rgmb, Tcfcp2, Etv1, Mycn, Ablim2, Wac, Mrpl12, Pias1, Tfb2m, Tada3, Srebf1, Rorb, Crem, Akirin2, Ift74, Rnf187, Ncoa7, Phf8, Il17…
GO:0044270	cellular nitrogen compoun	0.03590 ( 83 of 2312 genes )	0.01599 ( 544 of 34011 annotated genes )	1.683e-12	5.912e-09	Ino80, Rgs9, Rasgrp3, Kif20b, Msh2, Rras, Gnb2l1, Abca2, Atp2a2, Cpeb2, Rab13, Atl1, Atp1a4, Tubb6, Atf7ip, Rab2a, Tsc1, Tbc1d9, Abca4, Aldob, Rgs14, Ipcef1, Mx1, Rab6, Gna13, Arap3, Atp7a, Tbc1d20, Gmpr2, Arhgap1, Tbck, Dock7, Adap2, Clpx, Tbc1d5, Aldh1l1, Gda, Ralgapa1, Ahsa1, Gnl2, Asap3, Pde4b, Ralgapb, Pde11a, Sgsm3, Tpm1, Arfgap1, Tubb4, Atp5j2, Arap2, Wrn, Gsk3b, Arhgap27, Nras, Ide, Gnas,…
GO:0019220	regulation of phosphate m	0.04888 ( 113 of 2312 genes )	0.02490 ( 847 of 34011 annotated genes )	1.703e-12	5.981e-09	Erbb3, Lmtk3, Pdgfra, Mobkl1a, Nrg1, Atxn7, Map2k3, Fam129a, Areg, Fzd7, Elfn2, Gnb2l1, Dok7, Map3k5, Ptpn6, Rptor, Clspn, Sdc4, Hsp90b1, Agtr1a, Tsc1, Ankrd54, Dgkq, Spag9, Pik3ca, Fabp4, Hsp90ab1, Rgs14, Ccdc88a, Pfkfb2, Itsn1, Map3k1, Ccnc, Fnip1, Maged1, Dscam, Kirrel, Fgfr1, Afap1l2, Atp7a, Eef2k, Slit2, Nlrc5, Frs2, Klf4, Inpp5k, Dock7, Araf, Hyal2, Tgfbr1, Zfp622, Pxn, Fkbp15, Trp73, Ccny,…
GO:0006811	ion transport	0.05147 ( 119 of 2312 genes )	0.02687 ( 914 of 34011 annotated genes )	2.254e-12	7.918e-09	Slco1a6, Slc39a14, Trpm4, Prkcb, Dpp6, Jsrp1, Gria4, Cacna1h, Catsper2, Slc22a1, Best2, Trpm6, Camk2b, Slc12a1, Mchr1, Atp2a2, Kcnma1, Casq2, Slc47a1, Atp1a4, Ip6k2, Scn9a, Tsc1, Slc4a9, Scn4a, Tpcn1, Plcg1, Atp13a4, Scara5, Catsper1, Mcoln3, Tmem66, Slc10a2, Slc38a4, Ppp3ca, Kcnu1, Atp7a, Cacna1s, Inpp5k, Slc9a3, Slc5a7, Slc4a8, Slc22a21, Aqp2, Ahcyl1, Slc1a1, Bhlha15, Cacnb3, Gcg, Ccl5, Fam38b,…
GO:0009154	purine ribonucleotide cat	0.03157 ( 73 of 2312 genes )	0.01329 ( 452 of 34011 annotated genes )	2.324e-12	8.163e-09	Ino80, Rgs9, Rasgrp3, Kif20b, Msh2, Rras, Gnb2l1, Abca2, Atp2a2, Cpeb2, Rab13, Atl1, Atp1a4, Tubb6, Atf7ip, Rab2a, Tsc1, Tbc1d9, Abca4, Rgs14, Ipcef1, Mx1, Rab6, Gna13, Arap3, Atp7a, Tbc1d20, Gmpr2, Arhgap1, Tbck, Dock7, Adap2, Clpx, Tbc1d5, Ralgapa1, Gnl2, Asap3, Ralgapb, Sgsm3, Arfgap1, Tubb4, Atp5j2, Arap2, Wrn, Gsk3b, Arhgap27, Nras, Ide, Gnas, Top2a, Top1, Macf1, Rab21, Rab3a, Ascc3, Gnat2, …
GO:0051173	positive regulation of ni	0.06099 ( 141 of 2312 genes )	0.03390 ( 1153 of 34011 annotated genes )	2.398e-12	8.424e-09	Apbb1, Ino80, Pparg, Ctcf, Sp3, Map2k3, Brd7, Fzd7, Ciz1, Adora2b, Atf7ip, Ebf3, Ipcef1, Maged1, Fgfr1, Mef2d, Nlrc5, Eomes, Hyal2, Tgfbr1, Khdrbs3, Myo6, Bhlha15, Rbck1, Hmgn3, Smarcc1, Ikzf2, Fbxw11, Dmrt1, Creb1, Gsk3b, Inhba, Sox5, Cdc73, Gnas, Top2a, Tead1, Sox10, Ilk, Ppp1r12a, Hdac4, Ptgir, Med12, Rgmb, Rxfp2, Tcfcp2, Etv1, Mycn, Ablim2, Wac, Mrpl12, Pias1, Tfb2m, Tada3, Srebf1, Rorb, Jak2…
GO:0048870	cell motility	0.04715 ( 109 of 2312 genes )	0.02385 ( 811 of 34011 annotated genes )	2.661e-12	9.348e-09	Apbb1, Tns1, Pard3, Pdgfra, Trpm4, Nrg1, Disc1, Ephb4, Mink1, Ift46, Elmo2, Rras, Gnb2l1, Krit1, Catsper2, Atp1a4, Tnfrsf12a, Spag9, Plcg1, Sun2, Hc, Catsper1, Ccdc88a, Itgb7, Sema4a, Efnb1, Dixdc1, Scg2, Map3k1, Gna13, Msn, Arap3, Fgfr1, Jmy, Dclk1, Slit2, Klf4, Fktn, Enpep, Hyal2, Tgfbr1, Ccl5, Itgb3, Ptpru, Fert2, Cd2ap, Pde4b, Lyn, Il12a, Dmrt1, Cd74, Uts2, Col5a1, Cdc42bpa, Dll4, Cdk5, Dst, …
GO:0051674	localization of cell	0.04715 ( 109 of 2312 genes )	0.02385 ( 811 of 34011 annotated genes )	2.661e-12	9.348e-09	Apbb1, Tns1, Pard3, Pdgfra, Trpm4, Nrg1, Disc1, Ephb4, Mink1, Ift46, Elmo2, Rras, Gnb2l1, Krit1, Catsper2, Atp1a4, Tnfrsf12a, Spag9, Plcg1, Sun2, Hc, Catsper1, Ccdc88a, Itgb7, Sema4a, Efnb1, Dixdc1, Scg2, Map3k1, Gna13, Msn, Arap3, Fgfr1, Jmy, Dclk1, Slit2, Klf4, Fktn, Enpep, Hyal2, Tgfbr1, Ccl5, Itgb3, Ptpru, Fert2, Cd2ap, Pde4b, Lyn, Il12a, Dmrt1, Cd74, Uts2, Col5a1, Cdc42bpa, Dll4, Cdk5, Dst, …
GO:2000026	regulation of multicellul	0.05969 ( 138 of 2312 genes )	0.03305 ( 1124 of 34011 annotated genes )	3.103e-12	1.09e-08	Apbb1, Pparg, Prkcb, Boc, Frzb, Disc1, Fzd7, Rras, Krit1, 2400003C14Rik, Fam20c, Ltk, Adora2b, Agtr1a, Rbfox2, Ccdc88a, Dixdc1, Nbr1, Maged1, Dscam, Ssh3, Fgfr1, Lect1, Nipbl, Slit2, Eomes, Tgfbr1, Gas2l1, Ccl5, Itgb3, Pofut2, Cd74, Il7, Gsk3b, Inhba, Vash1, Sox5, Serpine2, Cdc73, Gnas, Sox10, Ilk, Rps6ka6, Pglyrp3, Hdac4, Bnip2, Hmgb3, Sgk1, Trpv2, Med12, Itgb1, Prkci, Ryk, Mycn, Cd36, Reln, Pik…
GO:0048666	neuron development	0.03979 ( 92 of 2312 genes )	0.01882 ( 640 of 34011 annotated genes )	3.362e-12	1.181e-08	Apbb1, Unc5b, Mycbp2, Boc, Disc1, Areg, Mink1, Fzd7, Camk2b, 2400003C14Rik, Ltk, Ptprd, Atl1, Ptprf, Dmd, Nfib, Tnfrsf12a, Tbr1, Arl3, Ccdc88a, Sema4a, Efnb1, Dixdc1, Rp1l1, Dscam, Ssh3, Kalrn, Fgfr1, Dclk1, Atp7a, Slit2, Nefl, Dock7, Rgnef, Prmt1, Tulp1, Evl, Myo6, Trp73, Ptprz1, Ankrd1, Htr7, Cdh23, Lifr, Lyn, Lama2, Vasp, Creb1, Cdk5, Dst, Gsk3b, Serpine2, Rab3a, Ilk, Sema7a, Cntn1, Pax6, Alca…
GO:0009261	ribonucleotide catabolic	0.03157 ( 73 of 2312 genes )	0.01341 ( 456 of 34011 annotated genes )	3.589e-12	1.261e-08	Ino80, Rgs9, Rasgrp3, Kif20b, Msh2, Rras, Gnb2l1, Abca2, Atp2a2, Cpeb2, Rab13, Atl1, Atp1a4, Tubb6, Atf7ip, Rab2a, Tsc1, Tbc1d9, Abca4, Rgs14, Ipcef1, Mx1, Rab6, Gna13, Arap3, Atp7a, Tbc1d20, Gmpr2, Arhgap1, Tbck, Dock7, Adap2, Clpx, Tbc1d5, Ralgapa1, Gnl2, Asap3, Ralgapb, Sgsm3, Arfgap1, Tubb4, Atp5j2, Arap2, Wrn, Gsk3b, Arhgap27, Nras, Ide, Gnas, Top2a, Top1, Macf1, Rab21, Rab3a, Ascc3, Gnat2, …
GO:0009207	purine ribonucleoside tri	0.03114 ( 72 of 2312 genes )	0.01314 ( 447 of 34011 annotated genes )	3.738e-12	1.313e-08	Ino80, Rgs9, Rasgrp3, Kif20b, Msh2, Rras, Gnb2l1, Abca2, Atp2a2, Cpeb2, Rab13, Atl1, Atp1a4, Tubb6, Atf7ip, Rab2a, Tsc1, Tbc1d9, Abca4, Rgs14, Ipcef1, Mx1, Rab6, Gna13, Arap3, Atp7a, Tbc1d20, Arhgap1, Tbck, Dock7, Adap2, Clpx, Tbc1d5, Ralgapa1, Gnl2, Asap3, Ralgapb, Sgsm3, Arfgap1, Tubb4, Atp5j2, Arap2, Wrn, Gsk3b, Arhgap27, Nras, Ide, Gnas, Top2a, Top1, Macf1, Rab21, Rab3a, Ascc3, Gnat2, Polq, A…
GO:0055086	nucleobase, nucleoside an	0.04931 ( 114 of 2312 genes )	0.02555 ( 869 of 34011 annotated genes )	4.052e-12	1.423e-08	Ino80, Rgs9, Ndufs1, Rasgrp3, Kif20b, Msh2, Rras, Gnb2l1, Abca2, Dnmt3a, Umps, Atp2a2, Cpeb2, Rab13, Atl1, Atp1a4, Adora2b, Tubb6, Atf7ip, Rab2a, Tsc1, Tbc1d9, Abca4, Grm3, Fmo1, Aldob, Pank1, Flna, Rgs14, Mx1, Ipcef1, Rab6, Adssl1, Nmnat1, Ocln, Gna13, Arap3, Atp7a, Tbc1d20, Gmpr2, Arhgap1, Tbck, Dock7, Adap2, Clpx, Tbc1d5, Mpp6, Gcg, Gda, Ralgapa1, Ahsa1, Htr7, Cngb3, Gnl2, Asap3, Pde4b, Aprt, …
GO:0009203	ribonucleoside triphospha	0.03114 ( 72 of 2312 genes )	0.01317 ( 448 of 34011 annotated genes )	4.167e-12	1.464e-08	Ino80, Rgs9, Rasgrp3, Kif20b, Msh2, Rras, Gnb2l1, Abca2, Atp2a2, Cpeb2, Rab13, Atl1, Atp1a4, Tubb6, Atf7ip, Rab2a, Tsc1, Tbc1d9, Abca4, Rgs14, Ipcef1, Mx1, Rab6, Gna13, Arap3, Atp7a, Tbc1d20, Arhgap1, Tbck, Dock7, Adap2, Clpx, Tbc1d5, Ralgapa1, Gnl2, Asap3, Ralgapb, Sgsm3, Arfgap1, Tubb4, Atp5j2, Arap2, Wrn, Gsk3b, Arhgap27, Nras, Ide, Gnas, Top2a, Top1, Macf1, Rab21, Rab3a, Ascc3, Gnat2, Polq, A…
GO:0048646	anatomical structure form	0.04585 ( 106 of 2312 genes )	0.02314 ( 787 of 34011 annotated genes )	4.682e-12	1.645e-08	Megf11, Ift122, Pdgfra, Prkcb, Sp3, Tulp3, Disc1, Ephb4, Fzd7, Rras, Krit1, Als2cr4, Adora2b, Tnfrsf12a, Tsc1, Plcg1, Gpc1, Pik3ca, Flna, Hc, Sema4a, Scg2, Ttll1, Ppp3r1, Gna13, Fgfr1, Atp7a, Lect1, Slit2, Cacna1s, Hectd1, Frs2, Klf4, Eomes, Dync2h1, Enpep, Lepr, Hoxa3, Fbn2, Tgfbr1, Nfatc4, Luzp1, Tet1, Ccl5, Lias, Mib1, Pofut2, Serpinf1, Tpm1, Gnpat, Uts2, Vasp, Ptprb, Dll4, Cdk5, Gsk3b, Vash1,…
GO:0010557	positive regulation of ma	0.05969 ( 138 of 2312 genes )	0.03325 ( 1131 of 34011 annotated genes )	4.867e-12	1.71e-08	Apbb1, Ino80, Pparg, Ctcf, Sp3, Map2k3, Brd7, Fam129a, Fzd7, Ciz1, Atf7ip, Ebf3, Maged1, Fgfr1, Mef2d, Nlrc5, Eomes, Hyal2, Tgfbr1, Myo6, Bhlha15, Rbck1, Hmgn3, Smarcc1, Ikzf2, Fbxw11, Dmrt1, Creb1, Gsk3b, Inhba, Sox5, Cdc73, Top2a, Tead1, Sox10, Ilk, Ppp1r12a, Hdac4, Med12, Rgmb, Tcfcp2, Etv1, Mycn, Ablim2, Wac, Mrpl12, Pias1, Tfb2m, Tada3, Srebf1, Rorb, Jak2, Crem, Akirin2, Ift74, Rnf187, Phf8,…
GO:0009146	purine nucleoside triphos	0.03114 ( 72 of 2312 genes )	0.01323 ( 450 of 34011 annotated genes )	5.174e-12	1.818e-08	Ino80, Rgs9, Rasgrp3, Kif20b, Msh2, Rras, Gnb2l1, Abca2, Atp2a2, Cpeb2, Rab13, Atl1, Atp1a4, Tubb6, Atf7ip, Rab2a, Tsc1, Tbc1d9, Abca4, Rgs14, Ipcef1, Mx1, Rab6, Gna13, Arap3, Atp7a, Tbc1d20, Arhgap1, Tbck, Dock7, Adap2, Clpx, Tbc1d5, Ralgapa1, Gnl2, Asap3, Ralgapb, Sgsm3, Arfgap1, Tubb4, Atp5j2, Arap2, Wrn, Gsk3b, Arhgap27, Nras, Ide, Gnas, Top2a, Top1, Macf1, Rab21, Rab3a, Ascc3, Gnat2, Polq, A…
GO:0031328	positive regulation of ce	0.06272 ( 145 of 2312 genes )	0.03558 ( 1210 of 34011 annotated genes )	5.32e-12	1.869e-08	Apbb1, Ino80, Pparg, Ctcf, Sp3, Map2k3, Brd7, Fam129a, Fzd7, Ciz1, Adora2b, Atf7ip, Ebf3, Anxa1, Maged1, Fgfr1, Mef2d, Nlrc5, Eomes, Hyal2, Tgfbr1, Myo6, Bhlha15, Rbck1, Ccl5, Hmgn3, Smarcc1, Ikzf2, Fbxw11, Dmrt1, Creb1, Gsk3b, Inhba, Sox5, Cdc73, Gnas, Top2a, Tead1, Sox10, Ilk, Ppp1r12a, Hdac4, Ptgir, Med12, Rgmb, Rxfp2, Tcfcp2, Etv1, Mycn, Ablim2, Wac, Mrpl12, Pias1, Tfb2m, Tada3, Srebf1, Rorb,…
GO:0022402	cell cycle process	0.04542 ( 105 of 2312 genes )	0.02290 ( 779 of 34011 annotated genes )	5.65e-12	1.985e-08	Apbb1, Ino80, Brca2, Cenpt, Tacc3, Kif20b, Csnk2a2, Kif2a, Brd7, Nek3, Birc6, Cntrob, Msh2, Chfr, Camk2b, Eif4e, Anp32b, Pms2, Usp8, Ptpn6, Dbf4, Clspn, Mll5, Usp37, Espl1, Pds5a, Ush1c, Dctn2, Flna, Rgs14, Stra8, Sgol1, Ppp3ca, Jmy, Sac3d1, Nipbl, Tdrd9, 4933424B01Rik, Stag2, Smc4, Gas2l1, Trp73, Ccny, Rbbp8, Kntc1, Setd8, Cd2ap, Incenp, Sgsm3, Il12a, Ppp2r5c, Pogz, Dmrt1, Pcid2, Smc5, Clgn, Cho…
GO:0051056	regulation of small GTPas	0.02292 ( 53 of 2312 genes )	0.00829 ( 282 of 34011 annotated genes )	7.245e-12	2.545e-08	Arfgap1, Rasgrp3, Cdc42bpa, Arap2, Nrg1, Gsk3b, D10Bwg1379e, Arhgap27, Psd3, Plekhg6, Mcf2l, Abr, Arhgef15, Bnip2, Obscn, Tsc1, Arhgef7, Tbc1d9, Ntrk2, Itsn1, Cyth1, Kndc1, Sgsm1, Psd, Rasip1, Kalrn, Rasgef1b, Arap3, Plekhg5, Tbc1d20, Slit2, Arhgap1, Reln, Tbck, Dock7, Amot, Rgnef, Gapvd1, Adap2, Tbc1d15, Tbc1d5, Arhgef12, Arhgef1, Lpar1, Rap1gds1, Flot1, Ralgapa1, Agrn, Rasgrp2, Asap3, Chn1, Ral…
GO:0009891	positive regulation of bi	0.06358 ( 147 of 2312 genes )	0.03640 ( 1238 of 34011 annotated genes )	7.507e-12	2.637e-08	Apbb1, Ino80, Pparg, Ctcf, Sp3, Map2k3, Brd7, Fam129a, Fzd7, Ciz1, Adora2b, Atf7ip, Ebf3, Anxa1, Maged1, Fgfr1, Mef2d, Nlrc5, Eomes, Hyal2, Tgfbr1, Myo6, Bhlha15, Rbck1, Ccl5, Hmgn3, Smarcc1, Ikzf2, Fbxw11, Dmrt1, Abcg1, Creb1, Gsk3b, Inhba, Sox5, Cdc73, Gnas, Top2a, Tead1, Sox10, Ilk, Ppp1r12a, Hdac4, Ptgir, Med12, Rgmb, Rxfp2, Tcfcp2, Etv1, Mycn, Ablim2, Wac, Mrpl12, Pias1, Tfb2m, Tada3, Srebf1…
GO:0042325	regulation of phosphoryla	0.04455 ( 103 of 2312 genes )	0.02243 ( 763 of 34011 annotated genes )	8.226e-12	2.89e-08	Erbb3, Pdgfra, Mobkl1a, Nrg1, Atxn7, Map2k3, Fam129a, Areg, Fzd7, Gnb2l1, Dok7, Map3k5, Ptpn6, Rptor, Clspn, Sdc4, Agtr1a, Tsc1, Ankrd54, Dgkq, Spag9, Pik3ca, Fabp4, Hsp90ab1, Rgs14, Ccdc88a, Pfkfb2, Itsn1, Map3k1, Ccnc, Fnip1, Maged1, Dscam, Kirrel, Fgfr1, Afap1l2, Atp7a, Eef2k, Slit2, Nlrc5, Frs2, Klf4, Inpp5k, Dock7, Araf, Hyal2, Tgfbr1, Zfp622, Pxn, Trp73, Ccny, Pde6h, 1810031K17Rik, Aplp2, G…
GO:0009143	nucleoside triphosphate c	0.03114 ( 72 of 2312 genes )	0.01341 ( 456 of 34011 annotated genes )	9.801e-12	3.443e-08	Ino80, Rgs9, Rasgrp3, Kif20b, Msh2, Rras, Gnb2l1, Abca2, Atp2a2, Cpeb2, Rab13, Atl1, Atp1a4, Tubb6, Atf7ip, Rab2a, Tsc1, Tbc1d9, Abca4, Rgs14, Ipcef1, Mx1, Rab6, Gna13, Arap3, Atp7a, Tbc1d20, Arhgap1, Tbck, Dock7, Adap2, Clpx, Tbc1d5, Ralgapa1, Gnl2, Asap3, Ralgapb, Sgsm3, Arfgap1, Tubb4, Atp5j2, Arap2, Wrn, Gsk3b, Arhgap27, Nras, Ide, Gnas, Top2a, Top1, Macf1, Rab21, Rab3a, Ascc3, Gnat2, Polq, A…
GO:0012501	programmed cell death	0.07050 ( 163 of 2312 genes )	0.04187 ( 1424 of 34011 annotated genes )	9.945e-12	3.494e-08	Apbb1, Erbb3, Pparg, Prkcb, Csnk2a2, Frzb, Birc6, Tctn3, Elmo2, Msh2, Gnb2l1, Krit1, Ltk, Kcnma1, Trp53bp2, Apip, Map3k5, Tmem132a, Agtr1a, Hbxip, Pik3ca, Anxa1, Pim3, Itsn1, Rps3, Scg2, Maged1, Fgfr1, Mef2d, H2-K1, Atp7a, Slit2, Araf, Ccar1, Hyal2, Tgfbr1, Dido1, Aqp2, Rbm10, Igf2r, Rbck1, Ccl5, Alb, Il12a, Ppp2r5c, Cd74, Faim, Dedd, Il7, Creb1, Traf2, Gsk3b, Inhba, Jag2, Top2a, G2e3, Sox10, Faf…
GO:0030001	metal ion transport	0.03676 ( 85 of 2312 genes )	0.01714 ( 583 of 34011 annotated genes )	1.062e-11	3.73e-08	Slc39a14, Trpm4, Prkcb, Dpp6, Jsrp1, Cacna1h, Catsper2, Trpm6, Camk2b, Slc12a1, Mchr1, Atp2a2, Kcnma1, Casq2, Atp1a4, Scn9a, Tsc1, Scn4a, Tpcn1, Plcg1, Scara5, Catsper1, Tmem66, Slc10a2, Slc38a4, Ppp3ca, Kcnu1, Atp7a, Cacna1s, Inpp5k, Slc9a3, Slc5a7, Slc4a8, Aqp2, Ahcyl1, Slc1a1, Bhlha15, Cacnb3, Gcg, Ccl5, Cdh23, Ryr1, Scn3a, Lyn, Slc9a5, Slc34a1, Kcnj6, Kcnk2, Slc12a7, Cdk5, Serpine2, Kcnc3, Ca…
GO:0006915	apoptosis	0.06964 ( 161 of 2312 genes )	0.04131 ( 1405 of 34011 annotated genes )	1.232e-11	4.33e-08	Apbb1, Erbb3, Pparg, Prkcb, Csnk2a2, Frzb, Birc6, Tctn3, Elmo2, Msh2, Gnb2l1, Krit1, Ltk, Kcnma1, Trp53bp2, Apip, Map3k5, Agtr1a, Hbxip, Pik3ca, Anxa1, Pim3, Itsn1, Rps3, Scg2, Maged1, Fgfr1, Mef2d, H2-K1, Atp7a, Slit2, Araf, Ccar1, Hyal2, Tgfbr1, Dido1, Aqp2, Rbm10, Igf2r, Rbck1, Ccl5, Alb, Il12a, Ppp2r5c, Cd74, Faim, Dedd, Il7, Creb1, Traf2, Gsk3b, Inhba, Jag2, Top2a, G2e3, Sox10, Faf1, Ilk, So…
GO:0048667	cell morphogenesis involv	0.02725 ( 63 of 2312 genes )	0.01103 ( 375 of 34011 annotated genes )	1.322e-11	4.644e-08	Apbb1, Unc5b, Mycbp2, Vasp, Creb1, Cdk5, Boc, Gsk3b, Dst, Disc1, Mink1, Fzd7, Rab3a, Camk2b, 2400003C14Rik, Ilk, Sema7a, Ptprd, Atl1, Ptprf, Pax6, Alcam, Nfib, Sgk1, Trpv2, Tnfrsf12a, Tbr1, Mapt, Rpl24, Ntrk2, Ryk, Sema4a, Efnb1, Etv1, Dixdc1, Kndc1, Dscam, Ssh3, Stxbp5, Kalrn, Lhx3, Dclk1, Atp7a, Slit2, Reln, Nefl, Dock7, Rgnef, Jak2, Cacna1f, Rtn4rl2, Mark2, Evl, Flot1, Apbb2, Ptprz1, Bmp7, Cdh…
GO:0000278	mitotic cell cycle	0.03417 ( 79 of 2312 genes )	0.01549 ( 527 of 34011 annotated genes )	1.416e-11	4.974e-08	Apbb1, Ino80, Brca2, Cenpt, Kif20b, Csnk2a2, Kif2a, Brd7, Nek3, Birc6, Chfr, Camk2b, Eif4e, Anp32b, Ptpn6, Dbf4, Clspn, Usp37, Espl1, Pds5a, Ush1c, Dctn2, Flna, Rgs14, Sgol1, Ptpn3, Pim3, Ppp3ca, Sac3d1, Afap1l2, Nipbl, 4933424B01Rik, Smc4, Stag2, Trp73, Ccny, Rbbp8, Kntc1, Setd8, Fert2, Cd2ap, Incenp, Ppp2r5c, Pogz, Dmrt1, Pcid2, Smc5, Inhba, Ccdc52, Cdc73, Top2a, D2Ertd750e, Cltc, Dlgap5, Nek9,…
GO:0000226	microtubule cytoskeleton	0.02119 ( 49 of 2312 genes )	0.00744 ( 253 of 34011 annotated genes )	1.445e-11	5.078e-08	Ino80, Brca2, Pard3, Tacc3, Ranbp10, Cdc42bpa, Chordc1, Spast, Dst, Kif2a, Ccdc52, Atxn7, Disc1, Cntrob, Ift46, Mark4, Cltc, Haus6, Cep68, Ppp1r12a, Son, Sgk1, Mybl2, Mapt, Espl1, Nav1, Dctn2, Rgs14, Flna, Sgol1, Ccdc88a, Pex14, Dixdc1, Ttll1, Sac3d1, Clip3, Dock7, Nefl, Ska1, Haus2, Hook3, Gas2l1, Dicer1, Chek1, Fert2, Cyld, Clasp1, Ccdc88c, Rock2,
GO:0048812	neuron projection morphog	0.02768 ( 64 of 2312 genes )	0.01132 ( 385 of 34011 annotated genes )	1.459e-11	5.126e-08	Apbb1, Unc5b, Mycbp2, Boc, Disc1, Mink1, Fzd7, Camk2b, 2400003C14Rik, Ptprd, Atl1, Ptprf, Dmd, Nfib, Tnfrsf12a, Tbr1, Sema4a, Efnb1, Dixdc1, Dscam, Ssh3, Kalrn, Dclk1, Atp7a, Slit2, Nefl, Dock7, Rgnef, Evl, Ptprz1, Lifr, Lama2, Creb1, Vasp, Dst, Gsk3b, Cdk5, Rab3a, Ilk, Sema7a, Pax6, Alcam, Sgk1, Trpv2, Mapt, Rpl24, Ryk, Ntrk2, Etv1, Kndc1, Stxbp5, Lhx3, Reln, Jak2, Cacna1f, Rtn4rl2, Mark2, Flot1…
GO:0009888	tissue development	0.06055 ( 140 of 2312 genes )	0.03443 ( 1171 of 34011 annotated genes )	1.481e-11	5.204e-08	Erbb3, Pparg, Boc, Frzb, Ninj1, Fzd7, Fam20c, Dmd, Myl3, Agtr1a, Xbp1, Flna, Anxa1, Sulf2, Psap, Col11a1, Nbr1, Maged1, Gna13, Tnfrsf19, Fgfr1, Mef2d, Atp7a, Lect1, Slit2, Eomes, Hoxa3, Itga8, Tgfbr1, Tcfcp2l1, Lias, Fbxw4, Pofut2, Chrnd, Scel, Dedd, Vasp, Gsk3b, Inhba, Sox5, Serpine2, Cdc73, Jag2, Gnas, Tead1, Sox10, Ilk, Rps6ka6, Gab1, Ext2, Hdac4, Krt71, Med12, Zfp238, Vcam1, Itgb1, Ift172, My…
GO:0072358	cardiovascular system dev	0.04282 ( 99 of 2312 genes )	0.02146 ( 730 of 34011 annotated genes )	1.608e-11	5.648e-08	Ift122, Erbb3, Pdgfra, Prkcb, Nrg1, Frzb, Ephb4, Fzd7, Rras, Krit1, Trp53bp2, Myl3, Adora2b, Tnfrsf12a, Agtr1a, Tsc1, Adrbk1, Plcg1, Pik3ca, Hc, Sema4a, Scg2, Ppp3r1, Col11a1, Gna13, Fgfr1, Smyd1, Atp7a, Lect1, Nipbl, Slit2, Frs2, Uty, Klf4, Ripply3, Enpep, Lepr, Adap2, Tgfbr1, Nfatc4, Luzp1, Ankrd1, Ccl5, Itgb3, Ryr1, Dhcr7, Mib1, Serpinf1, Tpm1, Uts2, Ptprb, Spint1, Col5a1, Dll4, Vash1, Stra6, …
GO:0072359	circulatory system develo	0.04282 ( 99 of 2312 genes )	0.02146 ( 730 of 34011 annotated genes )	1.608e-11	5.648e-08	Ift122, Erbb3, Pdgfra, Prkcb, Nrg1, Frzb, Ephb4, Fzd7, Rras, Krit1, Trp53bp2, Myl3, Adora2b, Tnfrsf12a, Agtr1a, Tsc1, Adrbk1, Plcg1, Pik3ca, Hc, Sema4a, Scg2, Ppp3r1, Col11a1, Gna13, Fgfr1, Smyd1, Atp7a, Lect1, Nipbl, Slit2, Frs2, Uty, Klf4, Ripply3, Enpep, Lepr, Adap2, Tgfbr1, Nfatc4, Luzp1, Ankrd1, Ccl5, Itgb3, Ryr1, Dhcr7, Mib1, Serpinf1, Tpm1, Uts2, Ptprb, Spint1, Col5a1, Dll4, Vash1, Stra6, …
GO:0016265	death	0.07310 ( 169 of 2312 genes )	0.04422 ( 1504 of 34011 annotated genes )	1.807e-11	6.348e-08	Apbb1, Erbb3, Pparg, Prkcb, Csnk2a2, Frzb, Birc6, Tctn3, Elmo2, Msh2, Gnb2l1, Krit1, Ltk, Kcnma1, Trp53bp2, Apip, Map3k5, Tmem132a, Agtr1a, Hbxip, Pik3ca, Anxa1, Pim3, Itsn1, Rps3, Scg2, Maged1, Fgfr1, Mef2d, H2-K1, Atp7a, Slit2, Araf, Ccar1, Hyal2, Tgfbr1, Dido1, Aqp2, Rbm10, Igf2r, Rbck1, Ccl5, Itgb3, Alb, Il12a, Ppp2r5c, Cd74, Faim, Dedd, Il7, Creb1, Traf2, Gsk3b, Inhba, Jag2, Top2a, G2e3, Sox…
GO:0031175	neuron projection develop	0.03460 ( 80 of 2312 genes )	0.01588 ( 540 of 34011 annotated genes )	1.918e-11	6.737e-08	Apbb1, Unc5b, Mycbp2, Boc, Disc1, Areg, Mink1, Fzd7, Camk2b, 2400003C14Rik, Ltk, Ptprd, Atl1, Ptprf, Dmd, Nfib, Tnfrsf12a, Tbr1, Ccdc88a, Sema4a, Efnb1, Dixdc1, Dscam, Ssh3, Kalrn, Fgfr1, Dclk1, Atp7a, Slit2, Nefl, Dock7, Rgnef, Prmt1, Tulp1, Evl, Myo6, Ptprz1, Ankrd1, Htr7, Lifr, Lyn, Lama2, Vasp, Creb1, Dst, Gsk3b, Cdk5, Serpine2, Rab3a, Ilk, Sema7a, Cntn1, Pax6, Alcam, Sgk1, Trpv2, Mapt, Rpl24…
GO:0042592	homeostatic process	0.05969 ( 138 of 2312 genes )	0.03390 ( 1153 of 34011 annotated genes )	1.925e-11	6.764e-08	Terf2ip, Slc39a14, Pparg, Trpm4, Prkcb, Sp3, Disc1, Eif2b4, Pygm, Krit1, Tnks2, 2700094K13Rik, Slc12a1, Atp2a2, Kcnma1, Casq2, Dmd, Aco1, Atp1a4, Scn9a, Agtr1a, Scara5, Gpc1, Pdilt, Rbfox2, Anxa1, Pim3, Tmx3, Gna13, Atp7a, Slc9a3, Aqp2, Gas2l1, Bhlha15, Aplp2, Ccl5, Itgb3, Fam38b, Hmgn3, Cdh23, Scn3a, Bsnd, Cd74, Chrnd, Kcnk2, Abcg1, Slc12a7, Il7, Inhba, Gnas, Cldn5, Ilk, Ryr3, Slc39a4, Bdh2, Apo…
GO:0009205	purine ribonucleoside tri	0.03244 ( 75 of 2312 genes )	0.01447 ( 492 of 34011 annotated genes )	2.062e-11	7.244e-08	Ino80, Rgs9, Ndufs1, Rasgrp3, Kif20b, Msh2, Rras, Gnb2l1, Abca2, Atp2a2, Cpeb2, Rab13, Atl1, Atp1a4, Tubb6, Atf7ip, Rab2a, Tsc1, Tbc1d9, Abca4, Rgs14, Ipcef1, Mx1, Rab6, Gna13, Arap3, Atp7a, Tbc1d20, Arhgap1, Tbck, Dock7, Adap2, Clpx, Tbc1d5, Ralgapa1, Gnl2, Asap3, Ralgapb, Sgsm3, Arfgap1, Tubb4, Atp5j2, Arap2, Wrn, Gsk3b, Arhgap27, Nras, Ide, Gnas, Top2a, Top1, Macf1, Rab21, Rab3a, Ascc3, Gnat2,…
GO:0008219	cell death	0.07266 ( 168 of 2312 genes )	0.04399 ( 1496 of 34011 annotated genes )	2.182e-11	7.667e-08	Apbb1, Erbb3, Pparg, Prkcb, Csnk2a2, Frzb, Birc6, Tctn3, Elmo2, Msh2, Gnb2l1, Krit1, Ltk, Kcnma1, Trp53bp2, Apip, Map3k5, Tmem132a, Agtr1a, Hbxip, Pik3ca, Anxa1, Pim3, Itsn1, Rps3, Scg2, Maged1, Fgfr1, Mef2d, H2-K1, Atp7a, Slit2, Araf, Ccar1, Hyal2, Tgfbr1, Dido1, Aqp2, Rbm10, Igf2r, Rbck1, Ccl5, Itgb3, Alb, Il12a, Ppp2r5c, Cd74, Faim, Dedd, Il7, Creb1, Traf2, Gsk3b, Inhba, Jag2, Top2a, G2e3, Sox…
GO:0009199	ribonucleoside triphospha	0.03244 ( 75 of 2312 genes )	0.01455 ( 495 of 34011 annotated genes )	2.769e-11	9.727e-08	Ino80, Rgs9, Ndufs1, Rasgrp3, Kif20b, Msh2, Rras, Gnb2l1, Abca2, Atp2a2, Cpeb2, Rab13, Atl1, Atp1a4, Tubb6, Atf7ip, Rab2a, Tsc1, Tbc1d9, Abca4, Rgs14, Ipcef1, Mx1, Rab6, Gna13, Arap3, Atp7a, Tbc1d20, Arhgap1, Tbck, Dock7, Adap2, Clpx, Tbc1d5, Ralgapa1, Gnl2, Asap3, Ralgapb, Sgsm3, Arfgap1, Tubb4, Atp5j2, Arap2, Wrn, Gsk3b, Arhgap27, Nras, Ide, Gnas, Top2a, Top1, Macf1, Rab21, Rab3a, Ascc3, Gnat2,…
GO:0045893	positive regulation of tr	0.05320 ( 123 of 2312 genes )	0.02923 ( 994 of 34011 annotated genes )	2.912e-11	1.023e-07	Apbb1, Ino80, Brca2, Pparg, Ctcf, Sp3, Atxn7, Map2k3, Brd7, Fzd7, Zfp287, Rptor, Nfib, Mll5, Atf7ip, Tbr1, Ebf3, Hivep3, Plac8, Map3k1, Nfix, Maged1, Ppp3ca, Fgfr1, Afap1l2, Mef2d, Smarca2, Nlrc5, Klf4, Inpp5k, Rrn3, Eomes, Ilf3, Crx, Hyal2, Tgfbr1, Arnt, Nfatc4, Myo6, Tet1, Bhlha15, Trp73, Rbck1, Ankrd1, Gtf2f2, Hmgn3, Smarcc1, Ikzf2, Tcfeb, Kdm5a, Fbxw11, Dmrt1, Tbk1, Pcid2, Ciita, Creb1, Gsk3b…
GO:0009150	purine ribonucleotide met	0.03330 ( 77 of 2312 genes )	0.01517 ( 516 of 34011 annotated genes )	3.202e-11	1.125e-07	Ino80, Rgs9, Ndufs1, Rasgrp3, Kif20b, Msh2, Rras, Gnb2l1, Abca2, Atp2a2, Cpeb2, Rab13, Atl1, Atp1a4, Tubb6, Atf7ip, Rab2a, Tsc1, Tbc1d9, Abca4, Rgs14, Ipcef1, Mx1, Rab6, Adssl1, Gna13, Arap3, Atp7a, Tbc1d20, Gmpr2, Arhgap1, Tbck, Dock7, Adap2, Clpx, Tbc1d5, Ralgapa1, Gnl2, Asap3, Ralgapb, Sgsm3, Arfgap1, Tubb4, Atp5j2, Arap2, Wrn, Gsk3b, Arhgap27, Nras, Ide, Gnas, Top2a, Top1, Macf1, Rab21, Rab3a…
GO:0045595	regulation of cell differ	0.05277 ( 122 of 2312 genes )	0.02896 ( 985 of 34011 annotated genes )	3.305e-11	1.161e-07	Apbb1, Pparg, Nrg1, Boc, Frzb, Disc1, Areg, Fzd7, Camk2b, 2400003C14Rik, Fam20c, Ltk, Ptprd, 2410016O06Rik, Ptprf, Ptpn6, Mll5, Tnfrsf12a, Ankrd54, Spag9, Rbfox2, Rgs14, Ccdc88a, Dixdc1, Nbr1, Irx3, Dscam, Ssh3, Kalrn, H2-DMa, Fgfr1, Nipbl, Slit2, Klf4, Nefl, Ctla4, Eomes, Fbn2, Tgfbr1, Stag2, Prmt1, Tet1, Gas2l1, Hook3, Trp73, Ankrd1, Ccl5, Itgb3, Htr7, Mib1, Pofut2, Serpinf1, Lyn, Dnmt3b, Cd74,…
GO:0023052	signaling	0.19464 ( 450 of 2312 genes )	0.14883 ( 5062 of 34011 annotated genes )	3.475e-11	1.221e-07	Terf2ip, Erbb3, Pparg, Prkcb, Boc, Arhgap11a, Map2k3, Brd7, Olfr613, Gria4, Disc1, Eif2b4, Olfr459, Clec1b, Gnb2l1, Tnks2, Olfr1298, Scn9a, Ppp1r1a, Xbp1, Olfr281, Gpr64, Fgf21, Adrbk1, Pik3ca, Flna, Anxa1, Itga10, Sulf2, Dkk2, Pim3, Asb9, Dixdc1, Duox1, Arhgap42, Nbr1, Maged1, Gna13, Gpr82, Ap2b1, Arap3, Fgfr1, Rasgef1b, Gpr153, Lect1, Slit2, Arhgap1, Nlrc5, Dnajc27, Tbck, Araf, Adap2, Hyal2, Ra…
GO:0009144	purine nucleoside triphos	0.03244 ( 75 of 2312 genes )	0.01464 ( 498 of 34011 annotated genes )	3.706e-11	1.302e-07	Ino80, Rgs9, Ndufs1, Rasgrp3, Kif20b, Msh2, Rras, Gnb2l1, Abca2, Atp2a2, Cpeb2, Rab13, Atl1, Atp1a4, Tubb6, Atf7ip, Rab2a, Tsc1, Tbc1d9, Abca4, Rgs14, Ipcef1, Mx1, Rab6, Gna13, Arap3, Atp7a, Tbc1d20, Arhgap1, Tbck, Dock7, Adap2, Clpx, Tbc1d5, Ralgapa1, Gnl2, Asap3, Ralgapb, Sgsm3, Arfgap1, Tubb4, Atp5j2, Arap2, Wrn, Gsk3b, Arhgap27, Nras, Ide, Gnas, Top2a, Top1, Macf1, Rab21, Rab3a, Ascc3, Gnat2,…
GO:0009259	ribonucleotide metabolic	0.03374 ( 78 of 2312 genes )	0.01552 ( 528 of 34011 annotated genes )	3.933e-11	1.382e-07	Ino80, Rgs9, Ndufs1, Rasgrp3, Kif20b, Msh2, Rras, Gnb2l1, Abca2, Umps, Atp2a2, Cpeb2, Rab13, Atl1, Atp1a4, Tubb6, Atf7ip, Rab2a, Tsc1, Tbc1d9, Abca4, Rgs14, Ipcef1, Mx1, Rab6, Adssl1, Gna13, Arap3, Atp7a, Tbc1d20, Gmpr2, Arhgap1, Tbck, Dock7, Adap2, Clpx, Tbc1d5, Ralgapa1, Gnl2, Asap3, Ralgapb, Sgsm3, Arfgap1, Tubb4, Atp5j2, Arap2, Wrn, Gsk3b, Arhgap27, Nras, Ide, Gnas, Top2a, Top1, Macf1, Rab21,…
GO:0009792	embryo development ending	0.03633 ( 84 of 2312 genes )	0.01729 ( 588 of 34011 annotated genes )	4.048e-11	1.422e-07	Ift122, Brca2, Pdgfra, Sp3, Tulp3, Birc6, Msh2, Trp53bp2, Psmc3, Tsc1, Cdk2ap1, Plcg1, Hc, Sulf2, Col11a1, Gna13, Fgfr1, Nipbl, Apba2, Slit2, Hectd1, Uty, Ripply3, Inpp5k, Rrn3, Tapt1, Eomes, Hoxa3, Tgfbr1, Prmt1, Arnt, Luzp1, Tet1, Rbbp8, Dscaml1, Lias, Mib1, Tcfeb, Tpm1, Vasp, Spint1, Sox5, Dnmt3l, Jag2, Gnas, Sox10, Col1a1, G2e3, Nasp, Hes5, Stk4, Gab1, Pax6, Ocrl, Apob, Grb2, Smad2, Med12, Ub…
GO:0033554	cellular response to stre	0.04931 ( 114 of 2312 genes )	0.02655 ( 903 of 34011 annotated genes )	4.582e-11	1.61e-07	Terf2ip, Apbb1, Ino80, Brca2, Atg10, Fam129a, Ube2w, Eif2b4, Mink1, Pxdn, Msh2, Pms2, Map3k5, Clspn, Xbp1, Gtf2h2, Polb, Spag9, Scara5, Mpv17, Rgs14, Anxa1, Rbbp7, Usp7, Atrx, Dixdc1, Rps3, Map3k1, Nbr1, Igf2bp1, Jmy, Atp7a, Nipbl, Fktn, Nefl, Ctla4, Atg3, Aqp2, Smc4, Zfp622, Arnt, Nfkbil2, Ubr5, Myo6, Clpb, Gas2l1, Smg1, Trp73, Rbbp8, Setd8, Ankrd1, Hipk3, Fert2, Alb, Lyn, Atad5, Ppp2r5c, Cd74, …
GO:0043085	positive regulation of ca	0.04325 ( 100 of 2312 genes )	0.02217 ( 754 of 34011 annotated genes )	4.605e-11	1.618e-07	Rgs9, Erbb3, Pdgfra, Pparg, Rasgrp3, Mobkl1a, Nrg1, Map2k3, Msh2, Gnb2l1, Dok7, Map3k5, Rptor, Clspn, Sdc4, Adora2b, Agtr1a, Tsc1, Dgkq, Spag9, Aldob, Hsp90ab1, Rgs14, Ccdc88a, Rab6, Pfkfb2, Itsn1, Rps3, Map3k1, Maged1, Gna13, Fgfr1, Afap1l2, Atp7a, Arhgap1, Frs2, Dock7, Araf, Tgfbr1, Zfp622, Clpx, Pxn, Trp73, Ccny, Pde6h, Gcg, Ralgapa1, Ahsa1, Ccl5, Itgb3, Htr7, Nlrp1a, Ralgapb, Lyn, Tpm1, Cd74,…
GO:0043009	chordate embryonic develo	0.03590 ( 83 of 2312 genes )	0.01711 ( 582 of 34011 annotated genes )	5.767e-11	2.026e-07	Ift122, Brca2, Pdgfra, Sp3, Tulp3, Birc6, Msh2, Psmc3, Tsc1, Cdk2ap1, Plcg1, Hc, Sulf2, Col11a1, Gna13, Fgfr1, Nipbl, Apba2, Slit2, Hectd1, Uty, Ripply3, Inpp5k, Rrn3, Tapt1, Eomes, Hoxa3, Tgfbr1, Prmt1, Arnt, Luzp1, Tet1, Rbbp8, Dscaml1, Lias, Mib1, Tcfeb, Tpm1, Vasp, Spint1, Sox5, Dnmt3l, Jag2, Gnas, Sox10, Col1a1, G2e3, Nasp, Hes5, Stk4, Gab1, Pax6, Ocrl, Apob, Grb2, Smad2, Med12, Ube2a, Zfp23…
GO:0000904	cell morphogenesis involv	0.03201 ( 74 of 2312 genes )	0.01452 ( 494 of 34011 annotated genes )	6.443e-11	2.263e-07	Apbb1, Unc5b, Mycbp2, Pard3, Boc, Disc1, Mink1, Fzd7, Camk2b, 2400003C14Rik, Ptprd, Atl1, Ptprf, Nfib, Tnfrsf12a, Tbr1, Flna, Sema4a, Efnb1, Dixdc1, Ppp3r1, Dscam, Ssh3, Kalrn, Dclk1, Lect1, Atp7a, Slit2, Nefl, Dock7, Eomes, Rgnef, Tgfbr1, Evl, Ptprz1, Fert2, Cdh23, Pofut2, Lama2, Vasp, Creb1, Dst, Gsk3b, Cdk5, Col1a1, Rab3a, Ilk, Sema7a, Pax6, Alcam, Sgk1, Smad2, Trpv2, Mapt, Rpl24, Hey2, Ryk, N…
GO:0055085	transmembrane transport	0.04715 ( 109 of 2312 genes )	0.02514 ( 855 of 34011 annotated genes )	6.857e-11	2.409e-07	Slc39a14, Tacc3, Trpm4, Jsrp1, Fzd7, Cacna1h, Catsper2, Slc22a1, Trpm6, Slc12a1, Atp2a2, Kcnma1, Casq2, Slc47a1, Atp1a4, Scn9a, Slc16a13, Mfsd6, Abcc12, Abca4, Scn4a, Tpcn1, Scara5, Hsp90ab1, Flna, Catsper1, Pex14, Slc38a4, Slc45a1, Kcnu1, Atp7a, Cacna1s, Sv2a, Slc9a3, Slc5a7, Hyal2, Oca2, Tgfbr1, Slc22a21, Aqp2, Slc6a14, Ahcyl1, Slc1a1, Ubr5, Mfsd7a, Slc35b3, Slc18a1, Cacnb3, Rbck1, Gcg, Abcb7, …
GO:0051336	regulation of hydrolase a	0.04196 ( 97 of 2312 genes )	0.02143 ( 729 of 34011 annotated genes )	7.513e-11	2.639e-07	Rgs9, Lmtk3, Pdgfra, Pparg, Rasgrp3, Birc6, Msh2, Elfn2, Gnb2l1, Map3k5, Kng2, Hsp90b1, Agtr1a, Tsc1, Serpina3b, Tbc1d9, Serpinb1c, Aldob, Hbxip, Rgs14, Rab6, Rps3, Gna13, Cast, Arap3, Fgfr1, Tbc1d20, Arhgap1, Klf4, Tbck, Dock7, Lepr, Adap2, Clpx, Pcsk1n, Tbc1d5, Fkbp15, Ralgapa1, Ahsa1, Ccl5, Serpinb12, Asap3, Nlrp1a, Serpinf1, Ralgapb, Sgsm3, Tpm1, Pcid2, Gchfr, Arfgap1, Spint1, Arap2, Wrn, Gsk…
GO:0010628	positive regulation of ge	0.05623 ( 130 of 2312 genes )	0.03202 ( 1089 of 34011 annotated genes )	8.929e-11	3.137e-07	Apbb1, Ino80, Pparg, Ctcf, Sp3, Map2k3, Brd7, Fzd7, Atf7ip, Ebf3, Maged1, Fgfr1, Mef2d, Nlrc5, Eomes, Hyal2, Tgfbr1, Myo6, Bhlha15, Rbck1, Ccl5, Hmgn3, Smarcc1, Ikzf2, Fbxw11, Dmrt1, Creb1, Gsk3b, Inhba, Sox5, Cdc73, Top2a, Tead1, Sox10, Ilk, Ppp1r12a, Hdac4, Med12, Rgmb, Tcfcp2, Etv1, Mycn, Ablim2, Wac, Mrpl12, Pias1, Tfb2m, Tada3, Srebf1, Rorb, Crem, Akirin2, Ift74, Rnf187, Ncoa7, Phf8, Il17a, …
GO:0007409	axonogenesis	0.02379 ( 55 of 2312 genes )	0.00938 ( 319 of 34011 annotated genes )	9.441e-11	3.317e-07	Apbb1, Unc5b, Mycbp2, Vasp, Creb1, Cdk5, Boc, Gsk3b, Dst, Disc1, Fzd7, Rab3a, 2400003C14Rik, Ilk, Sema7a, Atl1, Pax6, Alcam, Nfib, Trpv2, Tnfrsf12a, Tbr1, Mapt, Rpl24, Ntrk2, Ryk, Sema4a, Efnb1, Etv1, Dixdc1, Ssh3, Stxbp5, Dscam, Kalrn, Lhx3, Dclk1, Slit2, Reln, Dock7, Nefl, Jak2, Rgnef, Cacna1f, Rtn4rl2, Mark2, Evl, Flot1, Apbb2, Ptprz1, Bmp7, Brsk2, Chn1, Bmpr1b, Mapk8ip3, Lama2,
GO:0016568	chromatin modification	0.02768 ( 64 of 2312 genes )	0.01182 ( 402 of 34011 annotated genes )	9.615e-11	3.378e-07	Apbb1, Ino80, Brca2, Skp1a, Ctcf, Prkcb, Atxn7, Brd7, Eid1, Cdc73, Meaf6, Ash2l, Top1, Pbrm1, Dnmt3a, Rsf1, 2410016O06Rik, Nasp, Phf16, Hdac4, Mll5, Suv420h1, Bat3, Smarce1, Ube2a, 5430437P03Rik, Pcgf1, Rere, Kdm3b, Kdm2a, Hells, Baz2a, Rbbp7, Pim3, Chd4, Wac, Suds3, Apobec1, Ing5, Smyd1, Nipbl, Tada3, Chd9, Srebf1, Cbx8, Jak2, Whsc1, Dot1l, Prmt1, Tet1, L3mbtl4, Chek1, Setd8, Phf8, Suz12, Rcbtb1…
GO:0023014	signal transduction via p	0.04369 ( 101 of 2312 genes )	0.02279 ( 775 of 34011 annotated genes )	1.003e-10	3.524e-07	Terf2ip, Erbb3, Pdgfra, Prkcb, Nrg1, Map2k3, Mink1, Map3k5, Ptpn6, Agtr1a, Ankrd54, Dgkq, Fgf21, Spag9, Pik3ca, Flna, Rgs14, Psap, Itsn1, Dixdc1, Scg2, Map3k1, Nbr1, Mknk2, Gna13, Tnfrsf19, Fgfr1, Frs2, Klf4, Fktn, Rps6kb2, Inpp5k, Araf, Lepr, Hyal2, Dot1l, Tgfbr1, Zfp622, Map4k5, Pxn, Trp73, Pde6h, Rbck1, Gcg, Ccl5, Itgb3, Hipk3, Fert2, Ros1, Lyn, Il12a, Cd74, Ercc6, Map4k4, Traf2, Cdk5, Erc1, M…
GO:0009141	nucleoside triphosphate m	0.03244 ( 75 of 2312 genes )	0.01497 ( 509 of 34011 annotated genes )	1.051e-10	3.691e-07	Ino80, Rgs9, Ndufs1, Rasgrp3, Kif20b, Msh2, Rras, Gnb2l1, Abca2, Atp2a2, Cpeb2, Rab13, Atl1, Atp1a4, Tubb6, Atf7ip, Rab2a, Tsc1, Tbc1d9, Abca4, Rgs14, Ipcef1, Mx1, Rab6, Gna13, Arap3, Atp7a, Tbc1d20, Arhgap1, Tbck, Dock7, Adap2, Clpx, Tbc1d5, Ralgapa1, Gnl2, Asap3, Ralgapb, Sgsm3, Arfgap1, Tubb4, Atp5j2, Arap2, Wrn, Gsk3b, Arhgap27, Nras, Ide, Gnas, Top2a, Top1, Macf1, Rab21, Rab3a, Ascc3, Gnat2,…
GO:0006163	purine nucleotide metabol	0.04066 ( 94 of 2312 genes )	0.02079 ( 707 of 34011 annotated genes )	1.539e-10	5.407e-07	Ino80, Rgs9, Ndufs1, Rasgrp3, Kif20b, Msh2, Rras, Gnb2l1, Abca2, Atp2a2, Cpeb2, Rab13, Atl1, Atp1a4, Adora2b, Tubb6, Atf7ip, Rab2a, Tsc1, Tbc1d9, Abca4, Grm3, Aldob, Flna, Rgs14, Ipcef1, Mx1, Rab6, Adssl1, Gna13, Arap3, Atp7a, Tbc1d20, Gmpr2, Arhgap1, Tbck, Dock7, Adap2, Clpx, Tbc1d5, Gcg, Ralgapa1, Ahsa1, Htr7, Gnl2, Asap3, Pde4b, Ralgapb, Pde11a, Sgsm3, Tpm1, Arfgap1, Atp5j2, Tubb4, Arap2, Wrn,…
GO:0050793	regulation of development	0.06531 ( 151 of 2312 genes )	0.03931 ( 1337 of 34011 annotated genes )	1.575e-10	5.532e-07	Apbb1, Pparg, Prkcb, Boc, Frzb, Disc1, Fzd7, Rras, Krit1, 2400003C14Rik, Fam20c, Ltk, Adora2b, Agtr1a, Rbfox2, Ccdc88a, Dixdc1, Nbr1, Maged1, Dscam, Ssh3, Fgfr1, Lect1, Nipbl, Slit2, Eomes, Tgfbr1, Gas2l1, Ccl5, Itgb3, Pofut2, Cd74, Abcg1, Il7, Creb1, Gsk3b, Inhba, Vash1, Sox5, Serpine2, Cdc73, Gnas, Sox10, Ilk, Rps6ka6, Pglyrp3, Hdac4, Bnip2, Apob, Sgk1, Hmgb3, Trpv2, Med12, Itgb1, Prkci, Ryk, M…
GO:0034613	cellular protein localiza	0.04022 ( 93 of 2312 genes )	0.02049 ( 697 of 34011 annotated genes )	1.594e-10	5.6e-07	Terf2ip, Gga1, Pard3, Tacc3, Jsrp1, Fzd7, Gnb2l1, Tnks2, Pex26, Rab13, Scarb2, Nup214, Ap2a1, Rab2a, Stx5a, Gnptg, Tom1l2, Sun2, Hsp90ab1, Flna, Pex14, Copb1, Rab6, Morc3, Rph3a, Ppp3r1, Ppp3ca, Ap2b1, Pikfyve, Nipbl, Kpna4, Nbea, Inpp5k, Fbn2, Hyal2, Tgfbr1, Ahcyl1, Ubr5, Myo6, Hook3, Rbck1, Ptpru, Rab1, Ap3b2, Ralgapb, Fbxw11, Cd74, Cdk5, Gsk3b, Tnpo1, Rpain, 5730419I09Rik, Col1a1, Cltc, Macf1,…
GO:0031399	regulation of protein mod	0.04628 ( 107 of 2312 genes )	0.02487 ( 846 of 34011 annotated genes )	1.633e-10	5.736e-07	Atg10, Erbb3, Ctcf, Nrg1, Map2k3, Brd7, Disc1, Fam129a, Gnb2l1, Dok7, Map3k5, Ptpn6, Rptor, Clspn, Sdc4, Agtr1a, Tsc1, Ankrd54, Dgkq, Ube2d1, Spag9, Pik3ca, Fabp4, Hsp90ab1, Rgs14, Ccdc88a, Map3k1, Ccnc, Fnip1, Maged1, Kirrel, Fgfr1, Afap1l2, Nipbl, Eef2k, Slit2, Frs2, Fktn, Inpp5k, Dock7, Araf, Hyal2, Tgfbr1, Arnt, Pxn, Trp73, Ccny, Pde6h, 1810031K17Rik, Aplp2, Gcg, Ccl5, Itgb3, Hipk3, Fert2, Ly…
GO:0007243	intracellular protein kin	0.04282 ( 99 of 2312 genes )	0.02238 ( 761 of 34011 annotated genes )	1.697e-10	5.961e-07	Terf2ip, Pdgfra, Prkcb, Nrg1, Map2k3, Mink1, Map3k5, Ptpn6, Agtr1a, Ankrd54, Dgkq, Fgf21, Spag9, Pik3ca, Flna, Rgs14, Psap, Itsn1, Dixdc1, Scg2, Map3k1, Nbr1, Mknk2, Gna13, Tnfrsf19, Fgfr1, Frs2, Klf4, Fktn, Rps6kb2, Inpp5k, Araf, Lepr, Hyal2, Dot1l, Tgfbr1, Zfp622, Map4k5, Pxn, Trp73, Pde6h, Rbck1, Gcg, Ccl5, Itgb3, Hipk3, Fert2, Ros1, Lyn, Il12a, Cd74, Ercc6, Map4k4, Traf2, Cdk5, Erc1, Map2k2, …
GO:0006753	nucleoside phosphate meta	0.04542 ( 105 of 2312 genes )	0.02429 ( 826 of 34011 annotated genes )	1.814e-10	6.374e-07	Ino80, Rgs9, Ndufs1, Rasgrp3, Kif20b, Msh2, Rras, Gnb2l1, Abca2, Umps, Atp2a2, Cpeb2, Rab13, Atl1, Atp1a4, Adora2b, Tubb6, Atf7ip, Rab2a, Tsc1, Tbc1d9, Abca4, Grm3, Fmo1, Aldob, Pank1, Flna, Rgs14, Ipcef1, Mx1, Rab6, Adssl1, Nmnat1, Gna13, Arap3, Atp7a, Tbc1d20, Gmpr2, Arhgap1, Tbck, Dock7, Adap2, Clpx, Tbc1d5, Mpp6, Gcg, Ralgapa1, Ahsa1, Htr7, Cngb3, Gnl2, Asap3, Pde4b, Ralgapb, Pde11a, Sgsm3, T…
GO:0009117	nucleotide metabolic proc	0.04542 ( 105 of 2312 genes )	0.02429 ( 826 of 34011 annotated genes )	1.814e-10	6.374e-07	Ino80, Rgs9, Ndufs1, Rasgrp3, Kif20b, Msh2, Rras, Gnb2l1, Abca2, Umps, Atp2a2, Cpeb2, Rab13, Atl1, Atp1a4, Adora2b, Tubb6, Atf7ip, Rab2a, Tsc1, Tbc1d9, Abca4, Grm3, Fmo1, Aldob, Pank1, Flna, Rgs14, Ipcef1, Mx1, Rab6, Adssl1, Nmnat1, Gna13, Arap3, Atp7a, Tbc1d20, Gmpr2, Arhgap1, Tbck, Dock7, Adap2, Clpx, Tbc1d5, Mpp6, Gcg, Ralgapa1, Ahsa1, Htr7, Cngb3, Gnl2, Asap3, Pde4b, Ralgapb, Pde11a, Sgsm3, T…
GO:0070727	cellular macromolecule lo	0.04022 ( 93 of 2312 genes )	0.02058 ( 700 of 34011 annotated genes )	2.005e-10	7.042e-07	Terf2ip, Gga1, Pard3, Tacc3, Jsrp1, Fzd7, Gnb2l1, Tnks2, Pex26, Rab13, Scarb2, Nup214, Ap2a1, Rab2a, Stx5a, Gnptg, Tom1l2, Sun2, Hsp90ab1, Flna, Pex14, Copb1, Rab6, Morc3, Rph3a, Ppp3r1, Ppp3ca, Ap2b1, Pikfyve, Nipbl, Kpna4, Nbea, Inpp5k, Fbn2, Hyal2, Tgfbr1, Ahcyl1, Ubr5, Myo6, Hook3, Rbck1, Ptpru, Rab1, Ap3b2, Ralgapb, Fbxw11, Cd74, Cdk5, Gsk3b, Tnpo1, Rpain, 5730419I09Rik, Col1a1, Cltc, Macf1,…
GO:0044093	positive regulation of mo	0.04931 ( 114 of 2312 genes )	0.02731 ( 929 of 34011 annotated genes )	2.581e-10	9.068e-07	Terf2ip, Rgs9, Erbb3, Pdgfra, Pparg, Rasgrp3, Prkcb, Mobkl1a, Nrg1, Map2k3, Cald1, Msh2, Gnb2l1, Dok7, Krit1, Map3k5, Rptor, Clspn, Sdc4, Adora2b, Agtr1a, Tsc1, Dgkq, Spag9, Aldob, Hsp90ab1, Rgs14, Ccdc88a, Rab6, Pfkfb2, Itsn1, Rps3, Map3k1, Maged1, Gna13, Fgfr1, Jmy, Afap1l2, Atp7a, Arhgap1, Frs2, Dock7, Araf, Tgfbr1, Zfp622, Clpx, Pxn, Trp73, Ccny, Pde6h, Rbck1, Gcg, Ralgapa1, Ahsa1, Ccl5, Itgb…
GO:0022403	cell cycle phase	0.03590 ( 83 of 2312 genes )	0.01770 ( 602 of 34011 annotated genes )	3.127e-10	1.099e-06	Apbb1, Ino80, Brca2, Cenpt, Tacc3, Kif20b, Kif2a, Brd7, Nek3, Birc6, Msh2, Chfr, Camk2b, Eif4e, Anp32b, Pms2, Ptpn6, Dbf4, Usp37, Espl1, Pds5a, Ush1c, Dctn2, Flna, Rgs14, Stra8, Sgol1, Ppp3ca, Sac3d1, Nipbl, Tdrd9, 4933424B01Rik, Smc4, Stag2, Trp73, Ccny, Rbbp8, Kntc1, Setd8, Cd2ap, Incenp, Ppp2r5c, Pogz, Dmrt1, Pcid2, Smc5, Clgn, Inhba, Ccdc52, Cdc73, Top2a, D2Ertd750e, Cltc, Dlgap5, Haus6, Nek9…
GO:0044282	small molecule catabolic	0.04239 ( 98 of 2312 genes )	0.02235 ( 760 of 34011 annotated genes )	3.401e-10	1.195e-06	Dio2, Ino80, Rgs9, Rasgrp3, Kif20b, Acoxl, Msh2, Rras, Gnb2l1, Abca2, Atp2a2, Cpeb2, Rab13, Atl1, Atp1a4, Tubb6, Atf7ip, Rab2a, Tsc1, Tat, Tbc1d9, Abca4, Aldob, Rgs14, Ipcef1, Mx1, Rab6, Pfkfb2, Gna13, Arap3, Atp7a, Tbc1d20, Gmpr2, Arhgap1, Tbck, Dock7, Adap2, Clpx, Tbc1d5, Gda, Ralgapa1, Ahsa1, Gnl2, Asap3, Pde4b, Ralgapb, Pde11a, Pdhb, Sgsm3, Tpm1, Arfgap1, Pgls, Atp5j2, Tubb4, Arap2, Wrn, Gsk3…
GO:0046483	heterocycle metabolic pro	0.05061 ( 117 of 2312 genes )	0.02846 ( 968 of 34011 annotated genes )	3.766e-10	1.323e-06	Ino80, Rgs9, Ndufs1, Rasgrp3, Kif20b, Msh2, Rras, Gnb2l1, Abca2, Dnmt3a, Umps, Atp2a2, Cpeb2, Rab13, Atl1, Atp1a4, Adora2b, Tubb6, Atf7ip, Rab2a, Tsc1, Tbc1d9, Abca4, Grm3, Fmo1, Aldob, Pank1, Flna, Rgs14, Mx1, Ipcef1, Rab6, Adssl1, Nmnat1, Ocln, Gna13, Arap3, Atp7a, Tbc1d20, Gmpr2, Arhgap1, Tbck, Dock7, Adap2, Clpx, Tbc1d5, Aldh1l1, Gcg, Gda, Ralgapa1, Ahsa1, Htr7, Lias, Gnl2, Asap3, Pde4b, Aprt…
GO:0006259	DNA metabolic process	0.03676 ( 85 of 2312 genes )	0.01838 ( 625 of 34011 annotated genes )	3.802e-10	1.336e-06	Terf2ip, Apbb1, Ino80, Brca2, Pdgfra, Ctcf, Ube2w, Areg, Msh2, Ciz1, Tnks2, Dnmt3a, Isg20, Pms2, Dbf4, Nfib, Clspn, Mll5, Atf7ip, Pds5a, Gtf2h2, Polb, Dnase1l2, Pik3ca, Stra8, Ccdc88a, Rbbp7, Usp7, Atrx, Rps3, Nfix, Jmy, Tdrd9, Stag2, Smc4, Chtf18, Nfkbil2, Tet1, Smg1, Rbbp8, Ankrd1, Dnmt3b, Ercc6, Smc5, Lin9, Ppfibp2, Wrn, Gsk3b, Rpain, Gnas, Top2a, Mcm6, Top1, Dna2, Orc3, Ascc3, Exosc3, Nasp, P…
GO:0043933	macromolecular complex su	0.05017 ( 116 of 2312 genes )	0.02828 ( 962 of 34011 annotated genes )	5.162e-10	1.814e-06	Ift122, Cenpt, Ctcf, Nrg1, Pam, Gnb2l1, Dok7, Mpp7, Kcnma1, Atl1, Tubb6, Atf7ip, Smarce1, Tsc1, Patl1, Spag9, Aldob, Scara5, Gopc, Flna, Mtrf1l, Pex14, Map3k1, Nbr1, Ap2b1, Ssh3, Hr, Kirrel, H2-DMa, Jmy, Mbnl1, Smarca2, Slit2, Nefl, Rrn3, Smc4, Aqp2, Evl, Slc1a1, Fhad1, Pdss1, Gas2l1, Lsm14a, Trp73, Eln, Ccl5, Arpc2, Olfm1, Diap2, Fert2, Atl2, Kif5b, Smarcc1, Ccdc88c, Tpm1, Pogz, Cd74, Abcg1, Gch…
GO:0018193	peptidyl-amino acid modif	0.03201 ( 74 of 2312 genes )	0.01520 ( 517 of 34011 annotated genes )	5.315e-10	1.867e-06	Apbb1, Brca2, Galnt2, Pdgfra, Ctcf, Prkcb, Brd7, Camk2b, Phf16, Ptpn6, Clspn, Agtr1a, Adrbk1, Myo3b, Pik3ca, Rab6, Morc3, Ttll1, Map3k1, Fgfr1, Atp7a, Fkbp5, Inpp5k, Dock7, Agbl1, Araf, Dot1l, Tgfbr1, Prmt1, Pxn, Smg1, Setd8, Gcg, Ccl5, Itgb3, Hipk3, Fert2, Lyn, Il12a, Cd74, Gsk3b, Cdk5, Eid1, Meaf6, Sbk1, Ilk, Hes5, Stk4, Hdac4, Suv420h1, Sgk1, Bat3, Jak1, Csf1r, Clk3, Itgb1, Tnfrsf1a, Ing5, Cd3…
GO:0051276	chromosome organization	0.03547 ( 82 of 2312 genes )	0.01764 ( 600 of 34011 annotated genes )	6.118e-10	2.149e-06	Terf2ip, Apbb1, Ino80, Brca2, Skp1a, Cenpt, Ctcf, Prkcb, Atxn7, Brd7, Msh2, Tnks2, Dnmt3a, 2410016O06Rik, Phf16, Mll5, Smarce1, Espl1, Pcgf1, Rere, Kdm3b, Kdm2a, Stra8, Baz2a, Rbbp7, Pim3, D6Mm5e, Chd4, Acin1, Smyd1, Smarca2, Nipbl, Dot1l, Smc4, Stag2, Prmt1, Tet1, Setd8, Hmgn3, Smarcc1, Dnmt3b, Chd1, Kdm5a, Pogz, Smc5, Wrn, Eid1, Cdc73, Top2a, Ash2l, Meaf6, Top1, Pbrm1, Rsf1, Nasp, Ncaph2, Hdac4…
GO:0048878	chemical homeostasis	0.04412 ( 102 of 2312 genes )	0.02387 ( 812 of 34011 annotated genes )	6.389e-10	2.244e-06	Slc39a14, Ndufs1, Pdgfra, Pparg, Trpm4, Prkcb, Slc9a3r2, Dpp6, Disc1, Eif2b4, Pygm, Best2, Slc12a1, Cnr2, Mchr1, Atp2a2, Kcnma1, Casq2, Aco1, Atp1a4, Scn9a, Agtr1a, Tsc1, Scara5, Gpc1, Fabp4, Hc, Pim3, Gna13, Ppp3ca, Atp7a, Sv2a, Inpp5k, Slc9a3, Aqp2, Bhlha15, Aplp2, Ccl5, Itgb3, Abcb7, Fam38b, Hmgn3, Ryr1, Cdh23, Scn3a, Bsnd, Lyn, Slc34a1, Gnpat, Chrnd, Kcnk2, Abcg1, Uts2, Slc18a2, Cdk5, Mpdz, G…
GO:0010941	regulation of cell death	0.05926 ( 137 of 2312 genes )	0.03546 ( 1206 of 34011 annotated genes )	7.843e-10	2.755e-06	Apbb1, Erbb3, Pparg, Frzb, Birc6, Msh2, Gnb2l1, Krit1, Kcnma1, Trp53bp2, Apip, Map3k5, Tmem132a, Agtr1a, Hbxip, Pik3ca, Anxa1, Pim3, Itsn1, Rps3, Scg2, Maged1, Fgfr1, H2-K1, Atp7a, Slit2, Araf, Ccar1, Hyal2, Tgfbr1, Rbm10, Igf2r, Rbck1, Ccl5, Itgb3, Alb, Il12a, Ppp2r5c, Cd74, Faim, Dedd, Il7, Creb1, Traf2, Gsk3b, Inhba, Jag2, Top2a, G2e3, Sox10, Faf1, Ilk, Son, Sgk1, Cbl, Bat3, Arhgef7, Trim2, Gc…
GO:0070647	protein modification by s	0.02898 ( 67 of 2312 genes )	0.01332 ( 453 of 34011 annotated genes )	8.761e-10	3.078e-06	Atg10, Skp1a, Trpm4, Atxn7, Rnf103, Disc1, Birc6, Ube2w, Chfr, Tnks2, Usp8, Usp37, Ube2d1, Pcgf1, Usp42, Ube3c, Usp7, Usp15, Asb9, Map3k1, Hectd1, Atg3, Ubr1, Tgfbr1, Arnt, Ubr5, Rbck1, Gps1, Mib1, Usp20, Fbxw11, Nub1, Ppil2, Traf2, Cdk5, Cdc73, G2e3, Ube2f, Hdac4, Cbl, 5430437P03Rik, Ube2a, Trim2, Traf3, Bard1, Peli1, Rnf130, Os9, Rbbp6, Senp2, Wac, Pias1, Nedd4l, Cul1, Cbx8, Herc3, Tollip, Suz1…
GO:0043549	regulation of kinase acti	0.03157 ( 73 of 2312 genes )	0.01517 ( 516 of 34011 annotated genes )	1.168e-09	4.104e-06	Erbb3, Pdgfra, Nrg1, Map2k3, Gnb2l1, Dok7, Map3k5, Ptpn6, Rptor, Clspn, Sdc4, Agtr1a, Ankrd54, Tsc1, Dgkq, Spag9, Fabp4, Hsp90ab1, Rgs14, Ccdc88a, Pfkfb2, Map3k1, Ccnc, Maged1, Afap1l2, Fgfr1, Nlrc5, Frs2, Klf4, Inpp5k, Araf, Hyal2, Tgfbr1, Zfp622, Pxn, Trp73, Ccny, Pde6h, 1810031K17Rik, Aplp2, Gcg, Ccl5, Itgb3, Hipk3, Lyn, Cd74, Ercc6, Traf2, Chordc1, Gsk3b, Cdk5, Fam72a, Map2k2, Ilk, Stk4, Gab1…
GO:0019725	cellular homeostasis	0.03936 ( 91 of 2312 genes )	0.02067 ( 703 of 34011 annotated genes )	1.195e-09	4.197e-06	Slc39a14, Ndufs1, Pdgfra, Trpm4, Prkcb, Slc9a3r2, Dpp6, Disc1, Eif2b4, Pygm, Krit1, Best2, 2700094K13Rik, Cnr2, Mchr1, Atp2a2, Kcnma1, Casq2, Dmd, Aco1, Atp1a4, Scn9a, Agtr1a, Tsc1, Scara5, Gpc1, Pdilt, Hc, Pim3, Tmx3, Gna13, Ppp3ca, Atp7a, Sv2a, Aqp2, Txndc15, Aplp2, Ccl5, Itgb3, Abcb7, Fam38b, Hmgn3, Ryr1, Cdh23, Scn3a, Bsnd, Lyn, Gnpat, Chrnd, Kcnk2, Uts2, Slc12a7, Cdk5, Mpdz, Ide, Cldn5, Ilk,…
GO:0043067	regulation of programmed	0.05753 ( 133 of 2312 genes )	0.03437 ( 1169 of 34011 annotated genes )	1.266e-09	4.447e-06	Apbb1, Erbb3, Pparg, Frzb, Birc6, Msh2, Gnb2l1, Krit1, Kcnma1, Trp53bp2, Apip, Map3k5, Tmem132a, Agtr1a, Hbxip, Pik3ca, Anxa1, Pim3, Itsn1, Rps3, Scg2, Maged1, Fgfr1, H2-K1, Atp7a, Slit2, Araf, Ccar1, Hyal2, Tgfbr1, Rbm10, Igf2r, Rbck1, Ccl5, Alb, Il12a, Ppp2r5c, Cd74, Dedd, Il7, Faim, Creb1, Traf2, Gsk3b, Inhba, Jag2, Top2a, G2e3, Sox10, Faf1, Ilk, Son, Sgk1, Cbl, Bat3, Arhgef7, Trim2, Gclm, Pde…
GO:0016477	cell migration	0.04109 ( 95 of 2312 genes )	0.02199 ( 748 of 34011 annotated genes )	1.401e-09	4.922e-06	Apbb1, Tns1, Pard3, Pdgfra, Trpm4, Nrg1, Disc1, Ephb4, Mink1, Elmo2, Rras, Gnb2l1, Krit1, Tnfrsf12a, Spag9, Plcg1, Sun2, Hc, Ccdc88a, Itgb7, Sema4a, Efnb1, Dixdc1, Scg2, Map3k1, Gna13, Msn, Arap3, Fgfr1, Dclk1, Slit2, Klf4, Fktn, Enpep, Hyal2, Tgfbr1, Ccl5, Itgb3, Ptpru, Fert2, Cd2ap, Pde4b, Lyn, Il12a, Dmrt1, Cd74, Uts2, Cdc42bpa, Col5a1, Dll4, Cdk5, Vash1, Gsk3b, Macf1, Abr, Sox10, Col1a1, Ilk,…
GO:0010646	regulation of cell commun	0.06272 ( 145 of 2312 genes )	0.03861 ( 1313 of 34011 annotated genes )	1.684e-09	5.916e-06	Terf2ip, Erbb3, Pparg, Trpm4, Prkcb, Frzb, Gria4, Disc1, Tnks2, Casq2, Fgf21, Adrbk1, Gpc1, Flna, Sulf2, Dkk2, Pim3, Itsn1, Dixdc1, Arap3, Tnfrsf19, Fgfr1, Lect1, Slit2, Nlrc5, Fktn, Itga8, Hyal2, Tgfbr1, Ubr5, Myo6, Pde6h, Rbck1, Ccl5, Itgb3, Hmgn3, Il12a, Cd74, Lama2, Cilp, Creb1, Gsk3b, Inhba, Serpine2, Cdc73, Sox10, Rab3a, Scyl2, Ilk, Rps6ka6, Gab1, Bnip2, Ptgir, Cbl, Med12, Itgb1, Ryk, Taok1…
GO:0006508	proteolysis	0.04844 ( 112 of 2312 genes )	0.02770 ( 942 of 34011 annotated genes )	2.301e-09	8.084e-06	Adamdec1, Skp1a, Pcsk1, Prss28, Dpp6, Rnf103, Disc1, Ube2w, Chfr, Gnb2l1, Senp7, Usp8, Hsp90b1, Usp37, Nln, Espl1, Serpina3b, Usp24, Ube2d1, Serpinb1c, Usp42, Ube3c, Ptpn3, Usp7, Usp15, Map3k1, Mmp27, Capn13, Hectd1, Agbl1, Enpep, Mmp21, Ubr1, 4930519F16Rik, Ubr5, Clpx, Pcsk1n, Rbck1, Adamts16, Serpinb12, Cd2ap, Pigk, Usp20, Serpinf1, Prss37, Cul2, Ppp2r5c, Nub1, Fbxw11, Tmprss12, Prtn3, Serpine2…
GO:0044265	cellular macromolecule ca	0.02811 ( 65 of 2312 genes )	0.01305 ( 444 of 34011 annotated genes )	2.365e-09	8.309e-06	Skp1a, Rnf103, Disc1, Ube2w, Chfr, Gnb2l1, Isg20, Usp8, Hsp90b1, Usp37, Usp24, Ube2d1, Rnaseh2b, Patl1, Usp42, Dnase1l2, Ube3c, Usp7, Usp15, Map3k1, Hectd1, Ubr1, Ubr5, Clpx, Smg1, Rbbp8, Rbck1, Lsm1, Dcp2, Cd2ap, Usp20, Cul2, Ppp2r5c, Fbxw11, Nub1, Exosc9, Ncbp1, Ide, Ufd1l, Pnpt1, Dna2, Exosc3, Etf1, Papd5, Zmpste24, Apob, Bat3, Os9, Rbbp6, Usp53, Wac, Nedd4l, Cul1, Cul4b, Herc3, Exosc5, Rnf187…
GO:0001932	regulation of protein pho	0.03893 ( 90 of 2312 genes )	0.02064 ( 702 of 34011 annotated genes )	2.38e-09	8.361e-06	Erbb3, Nrg1, Map2k3, Fam129a, Gnb2l1, Dok7, Map3k5, Ptpn6, Rptor, Clspn, Sdc4, Agtr1a, Tsc1, Ankrd54, Dgkq, Spag9, Pik3ca, Fabp4, Hsp90ab1, Rgs14, Ccdc88a, Map3k1, Ccnc, Fnip1, Maged1, Kirrel, Afap1l2, Fgfr1, Eef2k, Slit2, Frs2, Inpp5k, Dock7, Araf, Hyal2, Tgfbr1, Pxn, Trp73, Ccny, Pde6h, 1810031K17Rik, Aplp2, Gcg, Ccl5, Itgb3, Hipk3, Fert2, Lyn, Il12a, Ccdc88c, Cd74, Ercc6, Traf2, Chordc1, Cdk5,…
GO:0042981	regulation of apoptosis	0.05666 ( 131 of 2312 genes )	0.03405 ( 1158 of 34011 annotated genes )	2.411e-09	8.471e-06	Apbb1, Erbb3, Pparg, Frzb, Birc6, Msh2, Gnb2l1, Krit1, Kcnma1, Trp53bp2, Apip, Map3k5, Agtr1a, Hbxip, Pik3ca, Anxa1, Pim3, Itsn1, Rps3, Scg2, Maged1, Fgfr1, H2-K1, Atp7a, Slit2, Araf, Ccar1, Hyal2, Tgfbr1, Rbm10, Igf2r, Rbck1, Ccl5, Alb, Il12a, Ppp2r5c, Cd74, Dedd, Il7, Faim, Creb1, Traf2, Gsk3b, Inhba, Jag2, Top2a, G2e3, Sox10, Faf1, Ilk, Son, Sgk1, Cbl, Bat3, Arhgef7, Trim2, Gclm, Pde1a, Rxfp2,…
GO:0051338	regulation of transferase	0.03201 ( 74 of 2312 genes )	0.01573 ( 535 of 34011 annotated genes )	2.458e-09	8.635e-06	Erbb3, Pdgfra, Pparg, Nrg1, Map2k3, Gnb2l1, Dok7, Map3k5, Ptpn6, Rptor, Clspn, Sdc4, Agtr1a, Ankrd54, Tsc1, Dgkq, Spag9, Fabp4, Hsp90ab1, Rgs14, Ccdc88a, Pfkfb2, Map3k1, Ccnc, Maged1, Afap1l2, Fgfr1, Nlrc5, Frs2, Klf4, Inpp5k, Araf, Hyal2, Tgfbr1, Zfp622, Pxn, Trp73, Ccny, Pde6h, 1810031K17Rik, Aplp2, Gcg, Ccl5, Itgb3, Hipk3, Lyn, Cd74, Ercc6, Traf2, Chordc1, Gsk3b, Cdk5, Fam72a, Map2k2, Ilk, Stk…
GO:0050801	ion homeostasis	0.03633 ( 84 of 2312 genes )	0.01885 ( 641 of 34011 annotated genes )	2.893e-09	1.016e-05	Slc39a14, Ndufs1, Pdgfra, Trpm4, Prkcb, Slc9a3r2, Dpp6, Disc1, Eif2b4, Pygm, Best2, Cnr2, Mchr1, Atp2a2, Kcnma1, Casq2, Aco1, Atp1a4, Scn9a, Agtr1a, Tsc1, Scara5, Gpc1, Hc, Gna13, Ppp3ca, Atp7a, Sv2a, Slc9a3, Aplp2, Ccl5, Itgb3, Abcb7, Fam38b, Cdh23, Ryr1, Scn3a, Bsnd, Lyn, Slc34a1, Gnpat, Chrnd, Kcnk2, Uts2, Cdk5, Mpdz, Gnas, Cldn5, Ilk, Ryr3, Hes5, Slc39a4, Sfxn5, Bdh2, Sgk1, Gclm, Bank1, Sfxn4…
GO:0006325	chromatin organization	0.02855 ( 66 of 2312 genes )	0.01350 ( 459 of 34011 annotated genes )	3.733e-09	1.311e-05	Apbb1, Ino80, Brca2, Skp1a, Ctcf, Prkcb, Atxn7, Brd7, Dnmt3a, 2410016O06Rik, Phf16, Mll5, Smarce1, Pcgf1, Rere, Kdm3b, Kdm2a, Baz2a, Rbbp7, Pim3, D6Mm5e, Chd4, Smyd1, Smarca2, Nipbl, Dot1l, Prmt1, Tet1, Setd8, Hmgn3, Smarcc1, Dnmt3b, Chd1, Kdm5a, Eid1, Cdc73, Ash2l, Meaf6, Top1, Pbrm1, Rsf1, Nasp, Hdac4, Suv420h1, Bat3, 5430437P03Rik, Ube2a, Hells, Suds3, Wac, Ing5, Apobec1, Tada3, Chd9, Srebf1, …
GO:0016044	cellular membrane organiz	0.03287 ( 76 of 2312 genes )	0.01652 ( 562 of 34011 annotated genes )	4.121e-09	1.448e-05	Jsrp1, Elmo2, Gnb2l1, Cdc42se2, Ap2a1, Abca4, Gtf2h2, Stx5a, Adrbk1, Scara5, Sun2, Anxa1, Catsper1, Ccdc88a, Itsn1, Rspo1, Havcr1, Ap2b1, Mrc2, Inpp5k, Izumo1, Slc9a3, Tulp1, Myo6, Fkbp15, Cd2ap, Ap3b2, Fnbp1l, Mib1, Usp20, Lrp2, Gnpat, Myh2, Sgcz, Eps15l1, Ankfy1, Prtn3, Col5a1, Cdk5, Arhgap27, Dbnl, 5730419I09Rik, Abr, Cltc, Sh3gl2, Rab3a, Scyl2, Rin2, Cd302, Chchd6, Zmpste24, Bat3, Grb2, Sh3kb…
GO:0006304	DNA modification	0.00779 ( 18 of 2312 genes )	0.00156 ( 53 of 34011 annotated genes )	4.519e-09	1.587e-05	Apobec1, Ctcf, Gsk3b, Gnas, Tdrd9, Dnmt3a, Exosc3, Ascc3, Exosc5, Tet1, Mll5, Atf7ip, Piwil4, Dntt, Mll1, Pik3ca, Hells, Dnmt3b,
GO:0007165	signal transduction	0.17734 ( 410 of 2312 genes )	0.13851 ( 4711 of 34011 annotated genes )	4.95e-09	1.739e-05	Terf2ip, Erbb3, Pparg, Prkcb, Boc, Arhgap11a, Map2k3, Brd7, Olfr613, Gria4, Disc1, Olfr459, Clec1b, Gnb2l1, Tnks2, Olfr1298, Ppp1r1a, Xbp1, Olfr281, Gpr64, Fgf21, Adrbk1, Pik3ca, Flna, Anxa1, Itga10, Sulf2, Dkk2, Asb9, Dixdc1, Duox1, Arhgap42, Nbr1, Maged1, Gna13, Gpr82, Arap3, Fgfr1, Rasgef1b, Gpr153, Lect1, Slit2, Arhgap1, Nlrc5, Dnajc27, Tbck, Araf, Adap2, Hyal2, Rab28, Tgfbr1, Ubr5, Myo6, Emr…
GO:0030029	actin filament-based proc	0.02552 ( 59 of 2312 genes )	0.01156 ( 393 of 34011 annotated genes )	4.969e-09	1.746e-05	Apbb1, Pard3, Vasp, Pdgfra, Cdc42bpa, Cdk5, Pam, Cald1, Ezr, Mink1, Arpc3, Abr, Capza2, Ilk, Shroom2, Sdc4, Hsp90b1, Grb2, Tsc1, Ush1c, Csf1r, Flii, Limch1, Sun2, Flna, Itgb1, Prkci, Ccdc88a, Jam3, Mybpc3, Dixdc1, Map3k1, Ssh3, Neb, Kirrel, Pdlim7, Jmy, Atp2c1, Slit2, Coro2a, Slc9a3r1, Inpp5k, Amot, Celsr1, Aqp2, Evl, Rap1gds1, Apbb2, Eln, Arpc2, Diap2, Fert2, Tnnt2, Fnbp1l, Syne2, Spna2, Tpm1, M…
GO:0000087	M phase of mitotic cell c	0.02163 ( 50 of 2312 genes )	0.00906 ( 308 of 34011 annotated genes )	5.387e-09	1.893e-05	Ino80, Pcid2, Smc5, Cenpt, Kif20b, Kif2a, Ccdc52, Nek3, Birc6, Chfr, Dlgap5, Cltc, D2Ertd750e, Nek9, Ppp1r12a, Papd5, Rad21, Usp37, Mybl2, Espl1, Rpl24, Ahctf1, Pds5a, Hells, Dctn2, Flna, Rgs14, Sgol1, Cep63, Sac3d1, Nipbl, 4933424B01Rik, Smc4, Stag2, Ska1, Haus2, Rbbp8, Chek1, Kntc1, Setd8, Smc2, Bmp7, Cd2ap, Vcpip1, Incenp, Clasp1, Usp44, Usp9x, Pogz, Dmrt1,
GO:0007265	Ras protein signal transd	0.02249 ( 52 of 2312 genes )	0.00961 ( 327 of 34011 annotated genes )	5.553e-09	1.951e-05	Arfgap1, Rasgrp3, Arap2, Nrg1, Gsk3b, D10Bwg1379e, Nras, Arhgap27, Psd3, Dbnl, Plekhg6, Mcf2l, Abr, Arhgef15, Usp8, Grb2, Obscn, Tsc1, Arhgef7, Tbc1d9, Ntrk2, Itsn1, Cyth1, Sgsm1, Gna13, Psd, Rasip1, Kalrn, Arap3, Plekhg5, Tbc1d20, Arhgap1, Eps8l1, Tbck, Dock7, Rgnef, Celsr1, Adap2, Tbc1d15, Tbc1d5, Arhgef12, Arhgef1, Rap1gds1, Flot1, Lpar1, Agrn, Arl6, Asap3, Chn1, Ralgapb, Sgsm3, Rock2,
GO:0042221	response to chemical stim	0.09256 ( 214 of 2312 genes )	0.06392 ( 2174 of 34011 annotated genes )	5.67e-09	1.992e-05	Apbb1, Mycbp2, Srp68, Pparg, Trpm4, Prkcb, Aff3, Boc, Pam, Eif2b4, Pygm, Elmo2, Slc22a1, Trpm6, Dnmt3a, Ltk, Atp2a2, Kcnma1, Casq2, Map3k5, Slc47a1, Aco1, Scn9a, Agtr1a, Xbp1, Adrbk1, Anxa1, Psap, Pim3, Duox1, Scg2, Dscam, Faf2, Atp7a, Slit2, Nlrc5, Hyal2, Tgfbr1, Aqp2, Slc6a14, Evl, Myo6, Igf2r, Akr1c13, Ccl5, Lias, Fert2, Hmgn3, Scn3a, Smarcc1, Il12a, Cd74, Abcg1, Lama2, Vasp, Creb1, Traf2, Inh…
GO:0061024	membrane organization	0.03287 ( 76 of 2312 genes )	0.01667 ( 567 of 34011 annotated genes )	6.089e-09	2.139e-05	Jsrp1, Elmo2, Gnb2l1, Cdc42se2, Ap2a1, Abca4, Gtf2h2, Stx5a, Adrbk1, Scara5, Sun2, Anxa1, Catsper1, Ccdc88a, Itsn1, Rspo1, Havcr1, Ap2b1, Mrc2, Inpp5k, Izumo1, Slc9a3, Tulp1, Myo6, Fkbp15, Cd2ap, Ap3b2, Fnbp1l, Mib1, Usp20, Lrp2, Gnpat, Myh2, Sgcz, Eps15l1, Ankfy1, Prtn3, Col5a1, Cdk5, Arhgap27, Dbnl, 5730419I09Rik, Abr, Cltc, Sh3gl2, Rab3a, Scyl2, Rin2, Cd302, Chchd6, Zmpste24, Bat3, Grb2, Sh3kb…
GO:0001701	in utero embryonic develo	0.02379 ( 55 of 2312 genes )	0.01050 ( 357 of 34011 annotated genes )	6.471e-09	2.273e-05	Brca2, Pdgfra, Spint1, Sox5, Sp3, Tulp3, Dnmt3l, Birc6, Jag2, Msh2, G2e3, Sox10, Nasp, Stk4, Gab1, Ocrl, Apob, Psmc3, Smad2, Grb2, Ube2a, Zfp238, Vcam1, Cdk2ap1, Hey2, Xab2, Plcg1, Cr1l, Hc, Itgb1, Gins1, Gna13, Fgfr1, Apba2, Slit2, Uty, Rrn3, Inpp5k, Tapt1, Amot, Eomes, Maff, Tgfbr1, Prmt1, Arnt, Tet1, Rbbp8, Taf8, Mll2, Mib1, Acvr1, Tpm1, Tcfeb, Mapk8ip3, C6,
GO:0010605	negative regulation of ma	0.05882 ( 136 of 2312 genes )	0.03634 ( 1236 of 34011 annotated genes )	6.861e-09	2.41e-05	Terf2ip, Apbb1, Pparg, Ctcf, Sp3, Brd7, Fam129a, Eif2b4, Msh2, Gnb2l1, Dnmt3a, Rfx5, Adora2b, Atf7ip, Pds5a, Zfp12, Trps1, Rbfox2, Flna, Pex14, Ptpn3, Rps3, Ubtf, Maged1, Kirrel, Fgfr1, Smyd1, Igf2bp1, Nipbl, Slit2, Tdrd9, Tcfcp2l1, Rbm10, Gas2l1, Rbbp8, Per1, Setd8, Itgb3, Fbxw11, Dmrt1, Dedd, Creb1, Gsk3b, Sox5, Serpine2, Eid1, Dnmt3l, Cdc73, Sox10, Ighmbp2, Hdac4, Piwil4, Bat3, Zfp238, Cr1l, R…
GO:0000279	M phase	0.02768 ( 64 of 2312 genes )	0.01311 ( 446 of 34011 annotated genes )	6.935e-09	2.436e-05	Ino80, Pcid2, Brca2, Smc5, Cenpt, Tacc3, Clgn, Kif20b, Kif2a, Ccdc52, Nek3, Birc6, Top2a, Msh2, Chfr, Dlgap5, Cltc, D2Ertd750e, Haus6, Camk2b, Nek9, Pms2, Ppp1r12a, Papd5, Rad21, Piwil4, Usp37, Bat3, Mybl2, Espl1, Rpl24, Ahctf1, Pds5a, Hells, Dctn2, Flna, Rgs14, Stra8, Sgol1, Cep63, Sac3d1, Nipbl, 4933424B01Rik, Tdrd9, Smc4, Stag2, Haus2, Ska1, Rbbp8, Dicer1, Chek1, Kntc1, Setd8, Smc2, Bmp7, Cd2a…
GO:0001568	blood vessel development	0.02855 ( 66 of 2312 genes )	0.01385 ( 471 of 34011 annotated genes )	1.055e-08	3.705e-05	Pdgfra, Prkcb, Ephb4, Rras, Krit1, Adora2b, Tnfrsf12a, Agtr1a, Plcg1, Pik3ca, Hc, Sema4a, Scg2, Ppp3r1, Gna13, Fgfr1, Lect1, Atp7a, Slit2, Klf4, Enpep, Lepr, Tgfbr1, Luzp1, Nfatc4, Ccl5, Itgb3, Dhcr7, Mib1, Serpinf1, Uts2, Ptprb, Col5a1, Spint1, Vash1, Dll4, Stra6, Col1a1, Pbrm1, Stk4, Pax6, Figf, Apob, Hey2, Itgb1, Sgpl1, Jam3, Ntrk2, Bai1, Ptprj, Tnfrsf1a, Rasip1, Cd36, Pik3r6, Ctsh, Amot, Dice…
GO:0045859	regulation of protein kin	0.02898 ( 67 of 2312 genes )	0.01417 ( 482 of 34011 annotated genes )	1.131e-08	3.973e-05	Erbb3, Nrg1, Map2k3, Gnb2l1, Dok7, Map3k5, Ptpn6, Rptor, Clspn, Sdc4, Agtr1a, Ankrd54, Tsc1, Dgkq, Spag9, Fabp4, Hsp90ab1, Rgs14, Ccdc88a, Map3k1, Ccnc, Maged1, Afap1l2, Fgfr1, Frs2, Inpp5k, Araf, Hyal2, Tgfbr1, Pxn, Trp73, Ccny, Pde6h, 1810031K17Rik, Aplp2, Gcg, Ccl5, Hipk3, Itgb3, Lyn, Cd74, Ercc6, Traf2, Chordc1, Gsk3b, Cdk5, Fam72a, Map2k2, Ilk, Stk4, Gab1, Csf1r, Taok1, Ptprj, Ghr, Reln, Pik…
GO:0000280	nuclear division	0.02076 ( 48 of 2312 genes )	0.00873 ( 297 of 34011 annotated genes )	1.249e-08	4.388e-05	Ino80, Pcid2, Smc5, Cenpt, Kif20b, Kif2a, Ccdc52, Nek3, Birc6, Chfr, Cltc, D2Ertd750e, Nek9, Ppp1r12a, Papd5, Rad21, Usp37, Mybl2, Espl1, Ahctf1, Pds5a, Hells, Dctn2, Flna, Rgs14, Sgol1, Cep63, Sac3d1, Nipbl, 4933424B01Rik, Smc4, Stag2, Ska1, Haus2, Rbbp8, Chek1, Kntc1, Setd8, Smc2, Bmp7, Cd2ap, Vcpip1, Incenp, Clasp1, Usp44, Usp9x, Pogz, Dmrt1,
GO:0007067	mitosis	0.02076 ( 48 of 2312 genes )	0.00873 ( 297 of 34011 annotated genes )	1.249e-08	4.388e-05	Ino80, Pcid2, Smc5, Cenpt, Kif20b, Kif2a, Ccdc52, Nek3, Birc6, Chfr, Cltc, D2Ertd750e, Nek9, Ppp1r12a, Papd5, Rad21, Usp37, Mybl2, Espl1, Ahctf1, Pds5a, Hells, Dctn2, Flna, Rgs14, Sgol1, Cep63, Sac3d1, Nipbl, 4933424B01Rik, Smc4, Stag2, Ska1, Haus2, Rbbp8, Chek1, Kntc1, Setd8, Smc2, Bmp7, Cd2ap, Vcpip1, Incenp, Clasp1, Usp44, Usp9x, Pogz, Dmrt1,
GO:0008283	cell proliferation	0.06099 ( 141 of 2312 genes )	0.03846 ( 1308 of 34011 annotated genes )	1.32e-08	4.637e-05	Erbb3, Pparg, Tacc3, Trpm4, Brd7, Frzb, Disc1, Birc6, Fzd7, Krit1, Ltk, Adora2b, Mov10l1, Agtr1a, Fgf21, Dctn2, Anxa1, Ccdc88a, Morc3, Dixdc1, Scg2, Maged1, Fgfr1, Lect1, Slit2, Fktn, Enpep, Hoxa3, Tgfbr1, Rbm10, Ccl5, Itgb3, Ptpru, Fert2, Dhcr7, Fbxw4, Il12a, Ppp2r5c, Dmrt1, Cd74, Il7, Gsk3b, Inhba, Vash1, Serpine2, Cdc73, Jag2, Tead1, Sox10, Ilk, Nasp, Figf, Hdac4, Ptgir, Ube2a, Vcam1, Pde1a, R…
GO:0030811	regulation of nucleotide	0.01687 ( 39 of 2312 genes )	0.00638 ( 217 of 34011 annotated genes )	1.491e-08	5.239e-05	Rgs9, Arfgap1, Rasgrp3, Arap2, Gsk3b, Arhgap27, Gnb2l1, Rab3a, Cpeb2, Tsc1, Arhgef7, Tbc1d9, Aldob, Rgs14, Ipcef1, Ntrk2, Rab6, Sgsm1, Rasip1, Arap3, Tbc1d20, Arhgap1, Dock7, Tbck, Amot, Adap2, Tbc1d15, Tbc1d5, Rap1gds1, Ahsa1, Ralgapa1, Agrn, Tnnt2, Tnnt3, Asap3, Chn1, Ralgapb, Sgsm3, Tpm1,
GO:0033121	regulation of purine nucl	0.01687 ( 39 of 2312 genes )	0.00638 ( 217 of 34011 annotated genes )	1.491e-08	5.239e-05	Rgs9, Arfgap1, Rasgrp3, Arap2, Gsk3b, Arhgap27, Gnb2l1, Rab3a, Cpeb2, Tsc1, Arhgef7, Tbc1d9, Aldob, Rgs14, Ipcef1, Ntrk2, Rab6, Sgsm1, Rasip1, Arap3, Tbc1d20, Arhgap1, Dock7, Tbck, Amot, Adap2, Tbc1d15, Tbc1d5, Rap1gds1, Ahsa1, Ralgapa1, Agrn, Tnnt2, Tnnt3, Asap3, Chn1, Ralgapb, Sgsm3, Tpm1,
GO:0048598	embryonic morphogenesis	0.03071 ( 71 of 2312 genes )	0.01549 ( 527 of 34011 annotated genes )	1.544e-08	5.424e-05	Ift122, Pdgfra, Aff3, Sp3, Tulp3, Frzb, Fzd7, Gnb2l1, Tsc1, Ush1c, Col11a1, Fgfr1, Otx1, Nipbl, Hectd1, Frs2, Klf4, Eomes, Dync2h1, Hoxa3, Itga8, Fbn2, Tgfbr1, Luzp1, Myo6, Dscaml1, Lias, Cdh23, Fbxw4, Mib1, Pofut2, Vasp, Spint1, Dll4, Inhba, Cdc73, Stra6, Foxp4, Gnas, Jag2, Tead1, Abr, Macf1, Sobp, Hs2st1, Stk4, Pax6, Gjb6, Ext2, Grb2, Smad2, Med12, Vcam1, T2, Osr2, Alx4, Ift172, Mycn, Tmem107, …
GO:0006897	endocytosis	0.02292 ( 53 of 2312 genes )	0.01020 ( 347 of 34011 annotated genes )	1.631e-08	5.728e-05	Eps15l1, Ankfy1, Prtn3, Cdk5, Arhgap27, Dbnl, Elmo2, Sh3gl2, Cltc, Abr, Gnb2l1, Rab3a, Scyl2, Rin2, Cdc42se2, Cd302, Ap2a1, Grb2, Gtf2h2, Sh3kbp1, Adrbk1, Scara5, Anxa1, Itgb1, Itsn1, Rab34, Rspo1, Havcr1, Ap2b1, Mrc2, Cd36, Ghr, Ap2a2, Clip3, Vamp7, Gapvd1, Hip1r, Slc9a3, Eea1, Tulp1, Myo6, Fkbp15, Dock1, Flot1, Pacsin3, Ahi1, Cd2ap, Sh3gl3, Ap3b2, Usp20, Mib1, Fnbp1l, Lrp2,
GO:0010324	membrane invagination	0.02292 ( 53 of 2312 genes )	0.01020 ( 347 of 34011 annotated genes )	1.631e-08	5.728e-05	Eps15l1, Ankfy1, Prtn3, Cdk5, Arhgap27, Dbnl, Elmo2, Sh3gl2, Cltc, Abr, Gnb2l1, Rab3a, Scyl2, Rin2, Cdc42se2, Cd302, Ap2a1, Grb2, Gtf2h2, Sh3kbp1, Adrbk1, Scara5, Anxa1, Itgb1, Itsn1, Rab34, Rspo1, Havcr1, Ap2b1, Mrc2, Cd36, Ghr, Ap2a2, Clip3, Vamp7, Gapvd1, Hip1r, Slc9a3, Eea1, Tulp1, Myo6, Fkbp15, Dock1, Flot1, Pacsin3, Ahi1, Cd2ap, Sh3gl3, Ap3b2, Usp20, Mib1, Fnbp1l, Lrp2,
GO:0001944	vasculature development	0.02941 ( 68 of 2312 genes )	0.01461 ( 497 of 34011 annotated genes )	1.67e-08	5.868e-05	Pdgfra, Prkcb, Frzb, Ephb4, Fzd7, Rras, Krit1, Adora2b, Tnfrsf12a, Agtr1a, Plcg1, Pik3ca, Hc, Sema4a, Scg2, Ppp3r1, Gna13, Fgfr1, Lect1, Atp7a, Slit2, Klf4, Enpep, Lepr, Tgfbr1, Luzp1, Nfatc4, Ccl5, Itgb3, Dhcr7, Mib1, Serpinf1, Uts2, Ptprb, Col5a1, Spint1, Vash1, Dll4, Stra6, Col1a1, Pbrm1, Stk4, Pax6, Figf, Apob, Hey2, Itgb1, Sgpl1, Jam3, Ntrk2, Bai1, Ptprj, Tnfrsf1a, Rasip1, Cd36, Pik3r6, Ctsh…
GO:0007167	enzyme linked receptor pr	0.03330 ( 77 of 2312 genes )	0.01741 ( 592 of 34011 annotated genes )	1.809e-08	6.354e-05	Ift122, Erbb3, Pdgfra, Prkcb, Nrg1, Atxn7, Ephb4, Areg, Dok7, Fam20c, Ltk, Ptprf, Fgf21, Gpc1, Adamtsl2, Flna, Rgs14, Sulf2, Map3k1, Fgfr1, Afap1l2, Lect1, Frs2, Inpp5k, Itga8, Fbn2, Tgfbr1, Emr4, Pxn, Pde6h, Aplp2, Fert2, Smarcc1, Lifr, Lyn, Cilp, Creb1, Inhba, Cdk5, Fam72a, Ilk, Hes5, Figf, Gab1, Ltbp1, Onecut2, Grb2, Smad2, Jak1, Rgmb, Csf1r, Sgpl1, Ntrk2, Ptprj, Ptprn, Ghr, Srebf1, Slc9a3r1, …
GO:0055082	cellular chemical homeost	0.03460 ( 80 of 2312 genes )	0.01835 ( 624 of 34011 annotated genes )	1.822e-08	6.401e-05	Slc39a14, Ndufs1, Pdgfra, Trpm4, Prkcb, Slc9a3r2, Dpp6, Disc1, Eif2b4, Pygm, Best2, Cnr2, Mchr1, Atp2a2, Kcnma1, Casq2, Aco1, Atp1a4, Scn9a, Agtr1a, Tsc1, Scara5, Gpc1, Hc, Pim3, Gna13, Ppp3ca, Atp7a, Sv2a, Aplp2, Ccl5, Itgb3, Abcb7, Fam38b, Hmgn3, Cdh23, Ryr1, Scn3a, Bsnd, Lyn, Gnpat, Chrnd, Kcnk2, Uts2, Cdk5, Mpdz, Cldn5, Ilk, Ryr3, Hes5, Slc39a4, Sgk1, Vcam1, Gclm, Bank1, Itgb1, Jam3, Lgi4, Sl…
GO:0010627	regulation of intracellul	0.03028 ( 70 of 2312 genes )	0.01529 ( 520 of 34011 annotated genes )	2.01e-08	7.063e-05	Terf2ip, Pdgfra, Prkcb, Nrg1, Mink1, Ptpn6, Ankrd54, Fgf21, Spag9, Flna, Rgs14, Psap, Itsn1, Dixdc1, Map3k1, Nbr1, Tnfrsf19, Fgfr1, Klf4, Fktn, Inpp5k, Lepr, Hyal2, Dot1l, Tgfbr1, Zfp622, Trp73, Rbck1, Gcg, Ccl5, Itgb3, Hipk3, Ros1, Lyn, Il12a, Cd74, Ercc6, Map4k4, Traf2, Map2k2, Ilk, Sema7a, Rps6ka6, Hes5, Gab1, Bnip2, Grb2, Peli1, Csf1r, Itgb1, Ryk, Ntrk2, Taok1, Ptprj, Tnfrsf1a, Cd36, Atp2c1, …
GO:0060341	regulation of cellular lo	0.03244 ( 75 of 2312 genes )	0.01685 ( 573 of 34011 annotated genes )	2.115e-08	7.432e-05	Apbb1, Pard3, Tacc3, Pcsk1, Prkcb, Pam, Fzd7, Cacna1h, Gnb2l1, Abca2, Casq2, Adora2b, Agtr1a, Adrbk1, Hsp90ab1, Flna, Hc, Anxa1, Pfkfb2, Pim3, Ppp3ca, Inpp5k, Hyal2, Tgfbr1, Ubr5, Slc18a1, Rbck1, Gcg, Ankrd1, Htr7, Hmgn3, Nlrp1a, Ralgapb, Lyn, Fbxw11, Uts2, Traf2, Creb1, Pclo, Inhba, Gsk3b, Cdk5, Kcnc3, Abr, Faf1, Rab3a, Ppp1r12a, Rab27a, Panx1, Mapt, Bard1, Csf1r, Prkci, Ntrk2, Doc2b, Tnfrsf1a, …
GO:0010558	negative regulation of ma	0.04628 ( 107 of 2312 genes )	0.02723 ( 926 of 34011 annotated genes )	2.391e-08	8.399e-05	Apbb1, Brca2, Pparg, Ctcf, Zfp295, Nrg1, Sp3, Brd7, Eif2b4, Gnb2l1, Dnmt3a, Zfp354a, 2410016O06Rik, Cpeb2, Rfx5, Nfib, Clspn, Adora2b, Atf7ip, Smarce1, Tsc1, Pds5a, Patl1, Zfp12, Trps1, Fabp4, Rbfox2, Stra8, Baz2a, Rbbp7, Pex14, Ubtf, Nfix, Maged1, Hr, Fgfr1, Smyd1, Igf2bp1, Smarca2, Nipbl, Cpeb3, Uty, Klf4, Ripply3, Inpp5k, Ilf3, Tcfcp2l1, Stag2, Rbm10, Tet1, Trp73, Rbbp8, Per1, Setd8, Ankrd1, I…
GO:0030163	protein catabolic process	0.02595 ( 60 of 2312 genes )	0.01235 ( 420 of 34011 annotated genes )	2.391e-08	8.401e-05	Skp1a, Dedd, Traf2, Nrg1, Serpine2, Rnf103, Ufd1l, Disc1, Ide, Ube2w, Chfr, Gnb2l1, Faf1, Usp8, Psmc3, Zmpste24, Hsp90b1, Usp37, Bat3, Usp24, Ube2d1, Usp42, Os9, Ube3c, Flna, Rbbp6, Ptpn3, Usp53, Usp7, Usp15, Asb9, Wac, Map3k1, Cast, Nedd4l, Cul4b, Cul1, Hectd1, Herc3, Ubr1, Ubr5, Clpx, Rbck1, Pacsin3, Rnf187, Usp45, Cd2ap, Hectd2, Furin, Wwp2, Grin2c, Usp20, Cul2, Sgsm3, Cyld, Ppp2r5c, Usp44, Fb…
GO:0044092	negative regulation of mo	0.03806 ( 88 of 2312 genes )	0.02102 ( 715 of 34011 annotated genes )	2.481e-08	8.715e-05	Lmtk3, Pparg, Birc6, Elfn2, Gnb2l1, Cnr2, Casq2, Ptpn6, Kng2, Nfib, 2310033E01Rik, Sbf1, Ppp1r1a, Serpina3b, Spag9, Grm3, Serpinb1c, Hbxip, Fabp4, Flna, Rgs14, Anxa1, Pex14, Usp7, Rps3, Nosip, Cast, Hr, Atp7a, Slit2, Nlrc5, Klf4, Inpp5k, Lepr, Hyal2, Pcsk1n, Fkbp15, Trp73, Rbck1, Ccl5, Hipk3, Serpinb12, Serpinf1, Lyn, Pcid2, Il7, Gchfr, Spint1, Chordc1, Gsk3b, Serpine2, Fam72a, Mug1, Ilk, Rsf1, S…
GO:0031324	negative regulation of ce	0.05536 ( 128 of 2312 genes )	0.03443 ( 1171 of 34011 annotated genes )	2.818e-08	9.899e-05	Terf2ip, Pparg, Ctcf, Sp3, Brd7, Fam129a, Eif2b4, Msh2, Gnb2l1, Dnmt3a, Rfx5, Atf7ip, Pds5a, Zfp12, Trps1, Rbfox2, Pex14, Ptpn3, Rps3, Ubtf, Maged1, Kirrel, Fgfr1, Smyd1, Igf2bp1, Nipbl, Slit2, Tcfcp2l1, Rbm10, Rbbp8, Per1, Setd8, Ccl5, Itgb3, Fbxw11, Dmrt1, Dedd, Creb1, Gsk3b, Sox5, Serpine2, Eid1, Cdc73, Dnmt3l, Sox10, Ighmbp2, Hdac4, Bat3, Zfp238, Cr1l, Rad18, Ift172, Mycn, Wac, Pias1, Cd36, S…
GO:0046578	regulation of Ras protein	0.01860 ( 43 of 2312 genes )	0.00759 ( 258 of 34011 annotated genes )	2.82e-08	9.906e-05	Arfgap1, Rasgrp3, Arap2, Nrg1, Gsk3b, D10Bwg1379e, Arhgap27, Psd3, Plekhg6, Mcf2l, Abr, Arhgef15, Obscn, Tsc1, Arhgef7, Tbc1d9, Ntrk2, Itsn1, Cyth1, Psd, Sgsm1, Rasip1, Kalrn, Arap3, Plekhg5, Tbc1d20, Arhgap1, Dock7, Tbck, Rgnef, Adap2, Tbc1d15, Tbc1d5, Arhgef12, Arhgef1, Lpar1, Rap1gds1, Flot1, Agrn, Asap3, Chn1, Ralgapb, Sgsm3,
GO:0045664	regulation of neuron diff	0.02336 ( 54 of 2312 genes )	0.01067 ( 363 of 34011 annotated genes )	2.997e-08	0.0001053	Apbb1, Cdk5, Gsk3b, Sox5, Serpine2, Disc1, Camk2b, 2400003C14Rik, Ilk, Sema7a, Ltk, Cntn1, Ptprd, Hes5, Ptprf, Pax6, Bnip2, Sgk1, Trpv2, Tnfrsf12a, Mapt, Spag9, Hey2, Itgb1, Prkci, Ntrk2, Ccdc88a, Ryk, Dixdc1, Irx3, Kndc1, Dscam, Ssh3, Kalrn, Fgfr1, Slit2, Reln, Nefl, Eomes, Mark2, Trp73, Lpar1, Efna3, Dicer1, Ankrd1, Bmp7, Ccl5, Htr7, Mib1, Chn1, Lyn, Sox11, Dnmt3b, Mapk8ip3,
GO:0048285	organelle fission	0.02119 ( 49 of 2312 genes )	0.00926 ( 315 of 34011 annotated genes )	3.101e-08	0.0001089	Ino80, Pcid2, Smc5, Cenpt, Kif20b, Kif2a, Ccdc52, Nek3, Birc6, Chfr, Cltc, D2Ertd750e, Nek9, Ppp1r12a, Papd5, Rad21, Usp37, Mybl2, Espl1, Ahctf1, Pds5a, Hells, Dctn2, Flna, Rgs14, Sgol1, Cep63, Sac3d1, Nipbl, 4933424B01Rik, Atg3, Smc4, Stag2, Ska1, Haus2, Rbbp8, Chek1, Kntc1, Setd8, Smc2, Bmp7, Cd2ap, Vcpip1, Incenp, Clasp1, Usp44, Usp9x, Pogz, Dmrt1,
GO:0031589	cell-substrate adhesion	0.01514 ( 35 of 2312 genes )	0.00553 ( 188 of 34011 annotated genes )	3.206e-08	0.0001126	Abi3bp, Cdk5, Gsk3b, Disc1, Mink1, Fzd7, Macf1, Col1a1, Plekha2, Ilk, Sdc4, Onecut2, Tnfrsf12a, Tsc1, Edil3, Itgb1, Itgb7, Hsd17b12, Jam3, Itgb4, Ptprj, Col5a3, Fbln2, Cd36, Itga2b, Jak2, Vwa2, Pxn, Itgb2l, Col3a1, Itgb3, Npnt, Epdr1, Fert2, Ccdc80,
GO:0006357	regulation of transcripti	0.05493 ( 127 of 2312 genes )	0.03419 ( 1163 of 34011 annotated genes )	3.38e-08	0.0001187	Apbb1, Ino80, Pparg, Prkcb, Pam, Sp3, Atxn7, Brd7, Frzb, Fzd7, Med8, Abca2, Dnmt3a, Zfp354a, Rfx5, Nfib, Atf7ip, Tbr1, Trps1, Plac8, Rbbp7, Map3k1, Nfix, Maged1, Ppp3ca, Fgfr1, Mef2d, Jmy, Smarca2, Otx1, Nipbl, Nlrc5, Klf4, Ripply3, Eomes, Crx, Hyal2, Tcfcp2l1, Rbm10, Arnt, Nfatc4, Myo6, Bhlha15, Trp73, Rbbp8, Per1, Rbck1, Setd8, Ankrd1, Hipk3, Gtf2f2, Hmgn3, Smarcc1, Ikzf2, Dnmt3b, Tcfeb, Dmrt1,…
GO:0006366	transcription from RNA po	0.05666 ( 131 of 2312 genes )	0.03558 ( 1210 of 34011 annotated genes )	3.396e-08	0.0001193	Apbb1, Ino80, Pparg, Prkcb, Pam, Sp3, Brd7, Frzb, Fzd7, Med8, Dnmt3a, Rfx5, Atf7ip, Xbp1, Trps1, Polr2a, Maged1, Fgfr1, Mef2d, Otx1, Nipbl, Nlrc5, Eomes, Hyal2, Tcfcp2l1, Rbm10, Myo6, Bhlha15, Rbbp8, Per1, Rbck1, Setd8, Hmgn3, Smarcc1, Ikzf2, Dmrt1, Creb1, Gsk3b, Inhba, Sox5, Eid1, Cdc73, Gnas, Top2a, Tead1, Sox10, Ighmbp2, Supt6h, Ppp1r12a, Hdac4, Rad21, Med12, Brwd1, Zfp238, Ift172, Mycn, Ablim…
GO:0009892	negative regulation of me	0.06099 ( 141 of 2312 genes )	0.03908 ( 1329 of 34011 annotated genes )	3.52e-08	0.0001237	Terf2ip, Apbb1, Pparg, Ctcf, Sp3, Brd7, Fam129a, Eif2b4, Msh2, Gnb2l1, Dnmt3a, Rfx5, Adora2b, Atf7ip, Pds5a, Zfp12, Trps1, Rbfox2, Flna, Pex14, Ptpn3, Rps3, Ubtf, Maged1, Kirrel, Fgfr1, Smyd1, Igf2bp1, Nipbl, Slit2, Tdrd9, Tcfcp2l1, Rbm10, Gas2l1, Rbbp8, Per1, Setd8, Ccl5, Itgb3, Fbxw11, Dmrt1, Dedd, Gchfr, Creb1, Gsk3b, Sox5, Serpine2, Eid1, Dnmt3l, Cdc73, Sox10, Ighmbp2, Hdac4, Piwil4, Bat3, Zf…
GO:0050767	regulation of neurogenesi	0.02638 ( 61 of 2312 genes )	0.01279 ( 435 of 34011 annotated genes )	3.653e-08	0.0001283	Apbb1, Pparg, Dll4, Cdk5, Gsk3b, Sox5, Serpine2, Disc1, Sox10, Camk2b, 2400003C14Rik, Ilk, Sema7a, Ltk, Cntn1, Ptprd, Hes5, Ptprf, Pax6, Bnip2, Sgk1, Trpv2, Tnfrsf12a, Mapt, Spag9, Hey2, Rgs14, Itgb1, Prkci, Ntrk2, Ccdc88a, Ryk, Dixdc1, Mycn, Irx3, Kndc1, Dscam, Ssh3, Kalrn, Fgfr1, Slit2, Reln, Nefl, Eomes, Mark2, Hook3, Trp73, Lpar1, Efna3, Dicer1, Ankrd1, Bmp7, Ccl5, Htr7, Mib1, Chn1, Lyn, Serp…
GO:0033043	regulation of organelle o	0.02638 ( 61 of 2312 genes )	0.01282 ( 436 of 34011 annotated genes )	3.974e-08	0.0001396	Terf2ip, Pcid2, Smc5, Mycbp2, Ctcf, Chordc1, Pam, Dst, Ccdc52, Brd7, Eid1, Arpc3, Map2k2, Rab3a, Capza2, Ilk, Shroom2, Sdc4, Sgk1, Grb2, Mapt, Tsc1, Csf1r, Anxa1, Ank1, Ccdc88a, Jam3, Taok1, Dixdc1, Doc2b, Map3k1, Apobec1, Ssh3, Neb, Kirrel, Jmy, Nipbl, Slit2, Clip3, Srebf1, Inpp5k, Celsr1, Mark2, Evl, Ska1, Tet1, Gas2l1, Chek1, Eln, Bmp7, Arpc2, Fert2, Mll1, Cyld, Dnmt3b, Spna2, Tpm1, Clasp1, Us…
GO:0016071	mRNA metabolic process	0.02422 ( 56 of 2312 genes )	0.01135 ( 386 of 34011 annotated genes )	4.054e-08	0.0001424	Hnrnph1, Pcid2, Ncbp1, Cpsf3, Ppie, Cdc73, Cdc5l, Pnpt1, Srrm1, Aqr, Snrpb2, Celf2, Exosc3, Etf1, Son, Papd5, Wdr83, Cwc22, Patl1, Elavl1, Snrpa, Xab2, Akap17b, Txnl4b, Snrnp27, Rbfox2, Sf3b4, Ythdc1, Wdr33, Apobec1, Bat1a, Zranb2, Igf2bp1, Mbnl1, Dhx8, Dhx9, Cdc40, Srsf2ip, Exosc5, Rbm10, Ahcyl1, Rbm28, Rbm22, Khdrbs3, Srrm2, Smg1, Qk, Lsm1, Dcp2, Prpf4b, Cstf2, Tra2b, Xrn1, Carhsp1, Hnrnpa3, Ex…
GO:0006873	cellular ion homeostasis	0.03244 ( 75 of 2312 genes )	0.01714 ( 583 of 34011 annotated genes )	4.367e-08	0.0001534	Slc39a14, Ndufs1, Pdgfra, Trpm4, Prkcb, Slc9a3r2, Dpp6, Disc1, Eif2b4, Pygm, Best2, Cnr2, Mchr1, Atp2a2, Kcnma1, Casq2, Aco1, Atp1a4, Scn9a, Agtr1a, Tsc1, Scara5, Gpc1, Hc, Gna13, Ppp3ca, Atp7a, Sv2a, Aplp2, Ccl5, Itgb3, Abcb7, Fam38b, Cdh23, Ryr1, Scn3a, Bsnd, Lyn, Gnpat, Chrnd, Kcnk2, Uts2, Cdk5, Mpdz, Cldn5, Ilk, Ryr3, Hes5, Slc39a4, Sgk1, Gclm, Bank1, Itgb1, Jam3, Lgi4, Slc8a3, Atp2c1, Reln, …
GO:0051493	regulation of cytoskeleto	0.01773 ( 41 of 2312 genes )	0.00720 ( 245 of 34011 annotated genes )	5.22e-08	0.0001834	Mycbp2, Chordc1, Pam, Dst, Ccdc52, Arpc3, Capza2, Ilk, Shroom2, Sdc4, Sgk1, Grb2, Mapt, Tsc1, Csf1r, Ccdc88a, Jam3, Taok1, Dixdc1, Map3k1, Ssh3, Neb, Kirrel, Jmy, Slit2, Clip3, Inpp5k, Celsr1, Evl, Mark2, Ska1, Gas2l1, Chek1, Eln, Arpc2, Fert2, Cyld, Tpm1, Spna2, Clasp1, Rock2,
GO:0006730	one-carbon metabolic proc	0.01946 ( 45 of 2312 genes )	0.00832 ( 283 of 34011 annotated genes )	5.761e-08	0.0002024	Ctcf, Nsun7, Gsk3b, Ftsjd1, Dnmt3l, Shmt1, Gnas, Ash2l, Dnmt3a, 2410016O06Rik, Etf1, Pcmt1, Mll5, Suv420h1, Piwil4, Atf7ip, Kdm2a, Hells, Pik3ca, Car8, Baz2a, Rab6, Rnmtl1, Apobec1, Tfb2m, Hnmt, 6430573F11Rik, Tdrd9, Ilf3, Whsc1, Dot1l, Prmt1, Comtd1, Ahcyl1, Tet1, Mettl1, Aldh1l1, Setd8, Phf8, Suz12, Mll1, 4832428D23Rik, Mll2, Dnmt3b, Mll3,
GO:0034621	cellular macromolecular c	0.02941 ( 68 of 2312 genes )	0.01508 ( 513 of 34011 annotated genes )	5.831e-08	0.0002049	Ift122, Cenpt, Ctcf, Nrg1, Dok7, Tubb6, Atf7ip, Smarce1, Patl1, Aldob, Flna, Mtrf1l, Map3k1, Ap2b1, Ssh3, Kirrel, Jmy, Mbnl1, Smarca2, Slit2, Nefl, Aqp2, Smc4, Evl, Fhad1, Gas2l1, Lsm14a, Eln, Ccl5, Arpc2, Diap2, Fert2, Kif5b, Smarcc1, Tpm1, Pogz, Vasp, Traf2, Creb1, Tarbp2, Tubb4, Cdk5, Arpc3, Celf2, Capza2, Rsf1, Etf1, Nasp, Shroom2, Sgk1, Grb2, Smad2, Mapt, Ahctf1, Rpl24, Hey2, Hells, Mybpc3, …
GO:0033674	positive regulation of ki	0.02206 ( 51 of 2312 genes )	0.01003 ( 341 of 34011 annotated genes )	6.019e-08	0.0002114	Ercc6, Erbb3, Pdgfra, Traf2, Nrg1, Cdk5, Map2k3, Map2k2, Dok7, Ilk, Stk4, Gab1, Map3k5, Rptor, Clspn, Sdc4, Agtr1a, Dgkq, Spag9, Csf1r, Hsp90ab1, Ccdc88a, Taok1, Pfkfb2, Map3k1, Maged1, Afap1l2, Fgfr1, Ghr, Reln, Frs2, Pik3r6, Araf, Jak2, Ikbkg, Tgfbr1, Zfp622, Pxn, Erbb4, Trp73, Lpar1, Ccny, Pde6h, Gcg, Cartpt, Itgb3, Ccl5, Lyn, Mapk8ip3, Magi3, Cd74,
GO:0043632	modification-dependent ma	0.01990 ( 46 of 2312 genes )	0.00861 ( 293 of 34011 annotated genes )	6.103e-08	0.0002144	Skp1a, Rnf103, Ufd1l, Disc1, Ube2w, Pnpt1, Chfr, Gnb2l1, Usp8, Zmpste24, Hsp90b1, Usp37, Bat3, Usp24, Ube2d1, Usp42, Os9, Ube3c, Rbbp6, Usp7, Usp53, Usp15, Wac, Map3k1, Nedd4l, Cul4b, Cul1, Hectd1, Herc3, Ubr1, Ubr5, Rbck1, Rnf187, Usp45, Cd2ap, Hectd2, Wwp2, Usp20, Cul2, Cyld, Fbxw11, Nub1, Usp44, Ppp2r5c, Usp9x, Exosc9,
GO:0000165	MAPKKK cascade	0.02638 ( 61 of 2312 genes )	0.01300 ( 442 of 34011 annotated genes )	6.545e-08	0.0002299	Ercc6, Map4k4, Pdgfra, Traf2, Nrg1, Map2k3, Mink1, Map2k2, Ilk, Sema7a, Rps6ka6, Gab1, Map3k5, Ptpn6, Bnip2, Grb2, Fgf21, Spag9, Csf1r, Rgs14, Itgb1, Ntrk2, Psap, Ryk, Taok1, Dixdc1, Scg2, Map3k1, Nbr1, Cd36, Fgfr1, Ghr, Klf4, Frs2, Fktn, Slc9a3r1, Araf, Jak2, Ctsh, Lepr, Tgfbr1, Zfp622, Pxn, Erbb4, Trp73, Lpar1, Pde6h, Gcg, Ccl5, Itgb3, Hipk3, Cartpt, Npnt, Ksr1, Sema4c, Sh3rf1, Lyn, Ros1, Mapk8…
GO:2000113	negative regulation of ce	0.04455 ( 103 of 2312 genes )	0.02646 ( 900 of 34011 annotated genes )	7.052e-08	0.0002477	Brca2, Pparg, Ctcf, Zfp295, Nrg1, Sp3, Brd7, Eif2b4, Gnb2l1, Dnmt3a, Zfp354a, 2410016O06Rik, Cpeb2, Rfx5, Nfib, Clspn, Atf7ip, Smarce1, Tsc1, Pds5a, Patl1, Zfp12, Trps1, Fabp4, Rbfox2, Stra8, Baz2a, Rbbp7, Pex14, Ubtf, Nfix, Maged1, Hr, Fgfr1, Smyd1, Igf2bp1, Smarca2, Nipbl, Cpeb3, Uty, Klf4, Ripply3, Inpp5k, Ilf3, Tcfcp2l1, Stag2, Rbm10, Tet1, Trp73, Rbbp8, Per1, Setd8, Ankrd1, Hipk3, Dnmt3b, Fb…
GO:0010647	positive regulation of ce	0.03676 ( 85 of 2312 genes )	0.02055 ( 699 of 34011 annotated genes )	7.31e-08	0.0002568	Terf2ip, Pdgfra, Trpm4, Prkcb, Nrg1, Gria4, Disc1, Mink1, Camk2b, Tnks2, Ptpn6, Rptor, Fgf21, Spag9, Flna, Rgs14, Sulf2, Dkk2, Itsn1, Dixdc1, Rspo1, Tnfrsf19, Fgfr1, Afap1l2, Nlrc5, Lepr, Itga8, Tgfbr1, Zfp622, Ubr5, Pde6h, Rbck1, Gcg, Ankrd1, Ccl5, Itgb3, Htr7, Lyn, Il12a, Cd74, Lama2, Uts2, Ankrd6, Inhba, Serpine2, Cdc73, Col1a1, Macf1, Ilk, Sema7a, Hes5, Gab1, Bnip2, Ptgir, Cbl, Smad2, Peli1, …
GO:0023056	positive regulation of si	0.03676 ( 85 of 2312 genes )	0.02055 ( 699 of 34011 annotated genes )	7.31e-08	0.0002568	Terf2ip, Pdgfra, Trpm4, Prkcb, Nrg1, Gria4, Disc1, Mink1, Camk2b, Tnks2, Ptpn6, Rptor, Agtr1a, Fgf21, Spag9, Flna, Rgs14, Sulf2, Dkk2, Itsn1, Dixdc1, Rspo1, Tnfrsf19, Fgfr1, Afap1l2, Nlrc5, Lepr, Itga8, Tgfbr1, Zfp622, Ubr5, Pde6h, Rbck1, Gcg, Ankrd1, Ccl5, Itgb3, Htr7, Lyn, Il12a, Cd74, Lama2, Uts2, Ankrd6, Inhba, Serpine2, Cdc73, Col1a1, Macf1, Ilk, Sema7a, Hes5, Gab1, Bnip2, Ptgir, Cbl, Smad2,…
GO:0045597	positive regulation of ce	0.02811 ( 65 of 2312 genes )	0.01426 ( 485 of 34011 annotated genes )	7.513e-08	0.0002639	Pparg, Nrg1, Boc, Frzb, Disc1, 2400003C14Rik, Fam20c, Ptprd, Ptprf, Mll5, Tnfrsf12a, Ankrd54, Spag9, Rgs14, Dixdc1, Irx3, Dscam, H2-DMa, Fgfr1, Nefl, Eomes, Fbn2, Trp73, Ccl5, Itgb3, Serpinf1, Lyn, Dnmt3b, Cd74, Uts2, Pcid2, Il7, Creb1, Sox5, Inhba, Serpine2, Gnas, Sox10, Col1a1, Ilk, Cd276, Sema7a, Pax6, Bnip2, Sgk1, Apob, Smad2, Trpv2, Mapt, Csf1r, Prkci, Itgb1, Ntrk2, Pias1, Pdlim7, Cd36, Jak2…
GO:0051960	regulation of nervous sys	0.02811 ( 65 of 2312 genes )	0.01426 ( 485 of 34011 annotated genes )	7.513e-08	0.0002639	Apbb1, Pparg, Dll4, Cdk5, Gsk3b, Sox5, Serpine2, Tulp3, Disc1, Sox10, Camk2b, 2400003C14Rik, Ilk, Sema7a, Ltk, Cntn1, Ptprd, Hes5, Arhgef15, Ptprf, Pax6, Bnip2, Sgk1, Trpv2, Tnfrsf12a, Mapt, Spag9, Hey2, Rgs14, Itgb1, Prkci, Ntrk2, Ccdc88a, Ryk, Dixdc1, Mycn, Irx3, Kndc1, Dscam, Ssh3, Kalrn, Fgfr1, Slit2, Reln, Nefl, Eomes, Celsr1, Mark2, Hook3, Trp73, Dicer1, Lpar1, Efna3, Ankrd1, Ccl5, Bmp7, Ag…
GO:0046903	secretion	0.03503 ( 81 of 2312 genes )	0.01929 ( 656 of 34011 annotated genes )	7.699e-08	0.0002705	Dio2, Apbb1, Erbb3, Pcsk1, Prkcb, Nrg1, Pam, Cacna1h, Slc12a1, Kcnma1, Adora2b, Agtr1a, Xbp1, Adrbk1, Exoc5, Plcg1, Hc, Anxa1, Pfkfb2, Pim3, Exoc3, Ppp3ca, Ap2b1, Kirrel, Scfd2, Mical3, Trim36, Hyal2, Slc18a1, Myo6, Trp73, Gcg, Ankrd1, Ccl5, Htr7, Hmgn3, Aprt, Nlrp1a, Lyn, Lrp2, Tac4, Cd74, Uts2, Gm885, Pi4k2a, Traf2, Creb1, Pclo, Slc18a2, Inhba, Cdk5, Serpine2, Kcnc3, Abr, Rab3a, Sytl2, Rab27a, …
GO:0034220	ion transmembrane transpo	0.02768 ( 64 of 2312 genes )	0.01397 ( 475 of 34011 annotated genes )	7.743e-08	0.000272	Slc39a14, Trpm4, Jsrp1, Cacna1h, Catsper2, Slc22a1, Trpm6, Slc12a1, Atp2a2, Kcnma1, Casq2, Atp1a4, Scn9a, Scn4a, Tpcn1, Scara5, Catsper1, Kcnu1, Atp7a, Cacna1s, Slc9a3, Slc5a7, Slc22a21, Ahcyl1, Slc1a1, Cacnb3, Gcg, Cngb3, Ryr1, Scn3a, Slc26a6, Slc9a5, Kcnk2, Kcnj6, Chrnd, Cdk5, Kcnc3, Catsper4, Cacna2d3, Ryr3, Tusc3, Slc39a4, Cnga3, Cacna2d1, Trpv2, Panx1, Slc22a6, Slc13a5, Slc4a10, Slc8a3, Atp2…
GO:0009628	response to abiotic stimu	0.02682 ( 62 of 2312 genes )	0.01338 ( 455 of 34011 annotated genes )	8.168e-08	0.0002869	Dio2, Apbb1, Ino80, Brca2, Ercc6, Cdk5, Pam, Wrn, Serpine2, Stra6, Eif2b4, Rpain, Arpp21, Msh2, Rab3a, Tsc22d4, Trp53bp2, Kcnma1, Mill2, Gnat2, Sgk1, Trpv2, Grb2, Ube2a, Xbp1, 5430437P03Rik, Scara5, Plac8, Rgs14, Strbp, Rbbp7, Rad18, Etv1, Map3k1, Apobec1, Col11a1, Dnaja2, Cd36, Nedd4l, Nipbl, Dhx9, Gnb1, Slc2a4, Cacna1f, Hyal2, Aqp2, Habp4, Tulp1, Crnn, Nfatc4, Pcsk1n, Myo6, Clpb, Trp73, Chek1, …
GO:0032446	protein modification by s	0.02379 ( 55 of 2312 genes )	0.01129 ( 384 of 34011 annotated genes )	8.257e-08	0.0002901	Atg10, Ppil2, Skp1a, Traf2, Trpm4, Cdk5, Rnf103, Disc1, Birc6, Cdc73, Ube2w, Chfr, G2e3, Tnks2, Ube2f, Hdac4, Cbl, Ube2a, Ube2d1, Pcgf1, Traf3, Trim2, Peli1, Bard1, Rnf130, Os9, Ube3c, Rbbp6, Asb9, Wac, Map3k1, Pias1, Nedd4l, Cul1, Hectd1, Cbx8, Herc3, Atg3, Ubr1, Tgfbr1, Arnt, Tollip, Ubr5, Rbck1, Suz12, Rnf187, Ufm1, Hectd2, Wwp2, Mib1, Vcpip1, Ube2j1, Fbxw11, Nub1, Usp44,
GO:0043408	regulation of MAPKKK casc	0.02033 ( 47 of 2312 genes )	0.00900 ( 306 of 34011 annotated genes )	8.689e-08	0.0003052	Ercc6, Map4k4, Pdgfra, Traf2, Mink1, Map2k2, Ilk, Sema7a, Rps6ka6, Gab1, Ptpn6, Bnip2, Grb2, Fgf21, Spag9, Csf1r, Rgs14, Itgb1, Ntrk2, Psap, Ryk, Taok1, Dixdc1, Map3k1, Nbr1, Cd36, Fgfr1, Klf4, Fktn, Slc9a3r1, Lepr, Zfp622, Erbb4, Trp73, Lpar1, Gcg, Hipk3, Itgb3, Npnt, Sema4c, Ksr1, Sh3rf1, Lyn, Ros1, Mapk8ip3, Cd74, Magi3,
GO:0051094	positive regulation of de	0.03590 ( 83 of 2312 genes )	0.02002 ( 681 of 34011 annotated genes )	9.407e-08	0.0003305	Pparg, Prkcb, Nrg1, Boc, Frzb, Disc1, Rras, Camk2b, 2400003C14Rik, Fam20c, Ptprd, Ptprf, Mll5, Tnfrsf12a, Agtr1a, Ankrd54, Spag9, Plcg1, Rgs14, Hc, Dixdc1, Irx3, Maged1, Dscam, H2-DMa, Fgfr1, Frs2, Nefl, Eomes, Fbn2, Trp73, Ccl5, Itgb3, Serpinf1, Lyn, Dnmt3b, Cd74, Uts2, Pcid2, Il7, Creb1, Sox5, Inhba, Serpine2, Gnas, Sox10, Col1a1, Ilk, Cd276, Sema7a, Pax6, Bnip2, Apob, Sgk1, Trpv2, Smad2, Mapt,…
GO:0009887	organ morphogenesis	0.03893 ( 90 of 2312 genes )	0.02235 ( 760 of 34011 annotated genes )	1.03e-07	0.0003617	Megf11, Ift122, Pdgfra, Sp3, Tulp3, Frzb, Ephb4, Amelx, Fam20c, Myl3, Agtr1a, Ush1c, Col11a1, Maged1, Dscam, Fgfr1, Mef2d, Otx1, Atp7a, Nipbl, Frs2, Klf4, Hoxa3, Itga8, Fbn2, Tgfbr1, Tulp1, Myo6, Dscaml1, Col11a2, Ankrd1, Cdh23, Ryr1, Smarcc1, Lifr, Mib1, Tpm1, Col5a1, Dll4, Ankrd6, Inhba, Gsk3b, Stra6, Jag2, Gnas, Tead1, Abr, Col1a1, Sobp, Pbrm1, Pax6, Gjb6, Shroom2, Cnga3, Gnat2, Krt71, Smad2, …
GO:0070588	calcium ion transmembrane	0.01038 ( 24 of 2312 genes )	0.00312 ( 106 of 34011 annotated genes )	1.045e-07	0.000367	Trpm4, Cdk5, Slc8a3, Atp2c1, Cacna1s, Catsper4, Cacna2d3, Cacna1h, Catsper2, Cacna1f, Trpm6, Ryr3, Atp2a2, Asph, Cacnb3, Trpv2, Cacna2d1, Panx1, Gcg, Ryr1, Ryr2, Tpcn1, Cacna1e, Catsper1,
GO:0034762	regulation of transmembra	0.02033 ( 47 of 2312 genes )	0.00906 ( 308 of 34011 annotated genes )	1.061e-07	0.0003727	Tacc3, Trpm4, Gsk3b, Jsrp1, Kcnc3, Catsper4, Fzd7, Cacna1h, Cacna2d3, Catsper2, Faf1, Kcnma1, Casq2, Scn9a, Trpv2, Cacna2d1, Scn4a, Tpcn1, Hsp90ab1, Flna, Catsper1, Tnfrsf1a, Cd36, Kcnu1, Cacna1s, Slc9a3r1, Jak2, Cacna1f, Hyal2, Tgfbr1, Ahcyl1, Ubr5, Erbb4, Cacnb3, Rbck1, Scn10a, Gcg, Fkbp1b, Ryr1, Scn3a, Cacna1e, Rbpms, Cyld, Fbxw11, Plcg2, Kcnk2, Kcnj6,
GO:0043065	positive regulation of ap	0.02984 ( 69 of 2312 genes )	0.01564 ( 532 of 34011 annotated genes )	1.092e-07	0.0003835	Apbb1, Brca2, Pparg, Frzb, Msh2, Gnb2l1, Camk2b, Trp53bp2, Kcnma1, Ptprf, Map3k5, Ptpn6, Ip6k2, Tnfrsf12a, Hc, Anxa1, Usp7, Rps3, Map3k1, Maged1, Jmy, H2-K1, Slit2, Ctla4, Ccar1, Hyal2, Tgfbr1, Rbm10, Zfp622, Nfatc4, Trp73, Igf2r, Rbck1, Ankrd1, Ccl5, Nlrp1a, Il12a, Ppp2r5c, Dedd, Ercc6, Inhba, Gsk3b, Cdk5, Top2a, Fam72a, Faf1, Ripk3, Stk4, Bat3, Rab27a, Arhgef7, Bard1, Prkci, Itgb1, B2m, Clip3, …
GO:0051050	positive regulation of tr	0.02768 ( 64 of 2312 genes )	0.01411 ( 480 of 34011 annotated genes )	1.14e-07	0.0004006	Apbb1, Erbb3, Pcsk1, Dpp6, Cacna1h, Mchr1, Adora2b, Agtr1a, Fgf21, Adrbk1, Hsp90ab1, Flna, Hc, Anxa1, Pfkfb2, Hyal2, Tgfbr1, Aqp2, Ahcyl1, Tulp1, Ubr5, Slc18a1, Rbck1, Gcg, Ankrd1, Ccl5, Nlrp1a, Mib1, Tac4, Abcg1, Creb1, Gsk3b, Cdk5, Gnas, Abr, Scyl2, Sytl2, Sgk1, Rab27a, Trpv2, Panx1, Csf1r, Prkci, Itgb1, Doc2b, Tnfrsf1a, Prss8, Stxbp5, Nedd4l, Cd36, Clip3, Jak2, Asph, Tmem30b, Rbm22, Erbb4, Car…
GO:0051301	cell division	0.02552 ( 59 of 2312 genes )	0.01261 ( 429 of 34011 annotated genes )	1.206e-07	0.0004238	Ino80, Brca2, Smc5, Cenpt, Pard3, Kif20b, Cdk5, Spast, Kif2a, Ccdc52, Nek3, Birc6, Cntrob, Fzd7, Top2a, Chfr, Top1, D2Ertd750e, 2400003C14Rik, Nek9, Usp8, Figf, Son, Papd5, Rad21, Vps4a, Usp37, Ahctf1, Pds5a, Zfp238, Arl3, Hells, Rgs14, Sgol1, Prc1, Dixdc1, Cep63, Sac3d1, Fgfr1, Ppp1cb, 4933424B01Rik, Smc4, Stag2, Haus2, Ska1, Bin3, Dicer1, Rbbp8, Ccny, Gkn1, Kntc1, Setd8, Smc2, Cd2ap, Incenp, Cl…
GO:0071822	protein complex subunit o	0.03936 ( 91 of 2312 genes )	0.02279 ( 775 of 34011 annotated genes )	1.289e-07	0.0004528	Ift122, Cenpt, Nrg1, Pam, Gnb2l1, Dok7, Mpp7, Kcnma1, Atl1, Tubb6, Atf7ip, Tsc1, Spag9, Aldob, Scara5, Gopc, Flna, Mtrf1l, Pex14, Map3k1, Nbr1, Ap2b1, Hr, Kirrel, H2-DMa, Jmy, Slit2, Nefl, Rrn3, Aqp2, Evl, Slc1a1, Fhad1, Pdss1, Gas2l1, Trp73, Eln, Ccl5, Arpc2, Olfm1, Diap2, Fert2, Atl2, Ccdc88c, Tpm1, Pogz, Cd74, Gchfr, Vasp, Traf2, Creb1, Clgn, Tubb4, Cdk5, Gsk3b, Spast, Shmt1, Ide, Kcnc3, Pnpt1…
GO:0006396	RNA processing	0.02941 ( 68 of 2312 genes )	0.01544 ( 525 of 34011 annotated genes )	1.417e-07	0.0004977	Hnrnph1, Ppie, Cdc5l, Srrm1, Snrpb2, Isg20, Snrpa, Akap17b, Rbfox2, Nol9, Utp6, Sf3b4, Ythdc1, D6Mm5e, Zranb2, Dus1l, Mbnl1, Rpl5, Adat2, Rps28, Ahcyl1, Khdrbs3, Lsm1, Cstf2, Utp14a, Exosc9, Ints9, Ncbp1, Cpsf3, Tarbp2, Cdc73, Pnpt1, Tyw1, Aqr, Celf2, Exosc3, Son, Wdr83, Zcchc6, Rcl1, Cwc22, Xab2, Clk3, Exosc8, Snrnp27, Txnl4b, Rnmtl1, Wdr33, Bat1a, Apobec1, Rpf1, Tfb2m, Dhx8, Ccnl1, Cdc40, Ints5…
GO:0009890	negative regulation of bi	0.04671 ( 108 of 2312 genes )	0.02855 ( 971 of 34011 annotated genes )	1.455e-07	0.0005112	Apbb1, Brca2, Pparg, Ctcf, Zfp295, Nrg1, Sp3, Brd7, Eif2b4, Gnb2l1, Dnmt3a, Zfp354a, 2410016O06Rik, Cpeb2, Rfx5, Nfib, Clspn, Adora2b, Atf7ip, Smarce1, Tsc1, Pds5a, Patl1, Zfp12, Trps1, Fabp4, Rbfox2, Stra8, Baz2a, Rbbp7, Pex14, Ubtf, Nfix, Maged1, Hr, Fgfr1, Smyd1, Igf2bp1, Smarca2, Nipbl, Cpeb3, Uty, Klf4, Ripply3, Inpp5k, Ilf3, Tcfcp2l1, Stag2, Rbm10, Tet1, Trp73, Rbbp8, Per1, Setd8, Ankrd1, I…
GO:0032535	regulation of cellular co	0.02595 ( 60 of 2312 genes )	0.01300 ( 442 of 34011 annotated genes )	1.501e-07	0.0005272	Apbb1, Ino80, Il7, Creb1, Pparg, Nrg1, Inhba, Serpine2, Frzb, Disc1, Atad3a, Arpc3, Gnb2l1, Tro, Capza2, 2400003C14Rik, Ilk, Sema7a, Shroom2, Rptor, Ip6k2, Sgk1, Trpv2, Tnfrsf12a, Sbf1, Grb2, Mapt, Tsc1, Igfbp7, Hsp90ab1, Rbbp7, Ryk, Ptprj, Map3k1, Ssh3, Neb, Dscam, Kirrel, Jmy, Dclk1, Smarca2, Slit2, Nefl, Htra3, Emp1, Hyal2, Tgfbr1, Evl, Gas2l1, Trp73, Bin3, Apbb2, Eln, Arpc2, Fert2, Mll2, Ros1…
GO:0043068	positive regulation of pr	0.02984 ( 69 of 2312 genes )	0.01579 ( 537 of 34011 annotated genes )	1.563e-07	0.0005489	Apbb1, Brca2, Pparg, Frzb, Msh2, Gnb2l1, Camk2b, Trp53bp2, Kcnma1, Ptprf, Map3k5, Ptpn6, Ip6k2, Tnfrsf12a, Hc, Anxa1, Usp7, Rps3, Map3k1, Maged1, Jmy, H2-K1, Slit2, Ctla4, Ccar1, Hyal2, Tgfbr1, Rbm10, Zfp622, Nfatc4, Trp73, Igf2r, Rbck1, Ankrd1, Ccl5, Nlrp1a, Il12a, Ppp2r5c, Dedd, Ercc6, Inhba, Gsk3b, Cdk5, Top2a, Fam72a, Faf1, Ripk3, Stk4, Bat3, Rab27a, Arhgef7, Bard1, Prkci, Itgb1, B2m, Clip3, …
GO:0060284	regulation of cell develo	0.02941 ( 68 of 2312 genes )	0.01549 ( 527 of 34011 annotated genes )	1.636e-07	0.0005747	Apbb1, Pparg, Boc, Frzb, Disc1, Camk2b, 2400003C14Rik, Ltk, Ptprd, Ptprf, Tnfrsf12a, Spag9, Rgs14, Ccdc88a, Dixdc1, Irx3, Dscam, Ssh3, Kalrn, Fgfr1, Slit2, Nefl, Eomes, Hook3, Trp73, Ankrd1, Ccl5, Htr7, Mib1, Pofut2, Serpinf1, Lyn, Dnmt3b, Dll4, Sox5, Gsk3b, Cdk5, Serpine2, Sox10, Col1a1, Ilk, Cntn1, Sema7a, Hes5, Pax6, Hdac4, Bnip2, Sgk1, Smad2, Trpv2, Mapt, Hey2, Prkci, Itgb1, Ryk, Ntrk2, Mycn,…
GO:0006974	response to DNA damage st	0.02682 ( 62 of 2312 genes )	0.01364 ( 464 of 34011 annotated genes )	1.656e-07	0.0005816	Terf2ip, Apbb1, Ino80, Brca2, Smc5, Ercc6, Wrn, Ube2w, Rpain, Ash2l, Top2a, Msh2, Dna2, Ascc3, Rps6ka6, Pms2, Chchd6, Clspn, Polq, Sgk1, Rad21, Grb2, Bat3, Ube2a, 5430437P03Rik, Gtf2h2, Polb, Brip1, Bard1, Xab2, Usp7, Atrx, Taok1, Rad18, Rps3, Wac, Cep63, Jmy, Cul4b, Nipbl, Rad51ap1, Rad51l3, Ctla4, Ikbkg, Smc4, Nfkbil2, Ubr5, Myo6, Smg1, Trp73, Rbbp8, Chek1, Setd8, Smc2, Ankrd1, Clock, Lyn, 2310…
GO:0051347	positive regulation of tr	0.02206 ( 51 of 2312 genes )	0.01038 ( 353 of 34011 annotated genes )	1.828e-07	0.0006423	Ercc6, Erbb3, Pdgfra, Traf2, Nrg1, Cdk5, Map2k3, Map2k2, Dok7, Ilk, Stk4, Gab1, Map3k5, Rptor, Clspn, Sdc4, Agtr1a, Dgkq, Spag9, Csf1r, Hsp90ab1, Ccdc88a, Taok1, Pfkfb2, Map3k1, Maged1, Afap1l2, Fgfr1, Ghr, Reln, Frs2, Pik3r6, Araf, Jak2, Ikbkg, Tgfbr1, Zfp622, Pxn, Erbb4, Trp73, Lpar1, Ccny, Pde6h, Gcg, Cartpt, Itgb3, Ccl5, Lyn, Mapk8ip3, Magi3, Cd74,
GO:0006816	calcium ion transport	0.01730 ( 40 of 2312 genes )	0.00726 ( 247 of 34011 annotated genes )	1.867e-07	0.000656	Trpm4, Prkcb, Cdk5, Jsrp1, Catsper4, Cacna1h, Cacna2d3, Catsper2, Trpm6, Camk2b, Ryr3, Mchr1, Atp2a2, Casq2, Trpv2, Cacna2d1, Panx1, Tpcn1, Plcg1, Catsper1, Tmem66, Ppp3ca, Slc8a3, Atp2c1, Cacna1s, Inpp5k, Cacna1f, Aqp2, Asph, Bhlha15, Cacnb3, Ccl5, Gcg, Fkbp1b, Cdh23, Ryr1, Ryr2, Cacna1e, Lyn, Plcg2,
GO:0043414	macromolecule methylation	0.01168 ( 27 of 2312 genes )	0.00391 ( 133 of 34011 annotated genes )	1.889e-07	0.0006635	Ctcf, Gsk3b, Tfb2m, Gnas, Ash2l, Tdrd9, Ilf3, Dnmt3a, Whsc1, Dot1l, Etf1, Prmt1, Pcmt1, Mll5, Suv420h1, Piwil4, Atf7ip, Setd8, Suz12, Mll1, Pik3ca, Hells, Mll2, Dnmt3b, Mll3, Baz2a, Rab6,
GO:0016569	covalent chromatin modifi	0.01860 ( 43 of 2312 genes )	0.00812 ( 276 of 34011 annotated genes )	2.018e-07	0.0007088	Apbb1, Brca2, Skp1a, Ctcf, Prkcb, Atxn7, Brd7, Eid1, Cdc73, Meaf6, Ash2l, Dnmt3a, 2410016O06Rik, Phf16, Hdac4, Mll5, Suv420h1, Ube2a, Pcgf1, Kdm2a, Hells, Baz2a, Pim3, Wac, Ing5, Apobec1, Nipbl, Tada3, Srebf1, Cbx8, Jak2, Whsc1, Dot1l, Prmt1, Tet1, Chek1, Setd8, Phf8, Suz12, Mll1, Mll2, Dnmt3b, Mll3,
GO:0010942	positive regulation of ce	0.03028 ( 70 of 2312 genes )	0.01626 ( 553 of 34011 annotated genes )	2.264e-07	0.0007953	Apbb1, Brca2, Pparg, Frzb, Msh2, Gnb2l1, Camk2b, Trp53bp2, Kcnma1, Ptprf, Map3k5, Ptpn6, Ip6k2, Tnfrsf12a, Hc, Anxa1, Usp7, Rps3, Map3k1, Maged1, Jmy, H2-K1, Slit2, Ctla4, Ccar1, Hyal2, Tgfbr1, Rbm10, Zfp622, Nfatc4, Trp73, Igf2r, Rbck1, Ankrd1, Ccl5, Nlrp1a, Il12a, Ppp2r5c, Dedd, Ercc6, Inhba, Gsk3b, Cdk5, Top2a, Fam72a, Faf1, Ripk3, Stk4, Bat3, Rab27a, Arhgef7, Bard1, Prkci, Itgb1, Mycn, B2m, C…
GO:0006184	GTP catabolic process	0.02119 ( 49 of 2312 genes )	0.00988 ( 336 of 34011 annotated genes )	2.369e-07	0.0008323	Rgs9, Arfgap1, Tubb4, Rasgrp3, Arap2, Gsk3b, Nras, Arhgap27, Gnas, Rras, Gnb2l1, Rab3a, Rab21, Cpeb2, Rab13, Atl1, Gnat2, Tubb6, Rab2a, Tsc1, Arhgef7, Tbc1d9, Rgs14, Ipcef1, Mx1, Ntrk2, Rab6, Rab34, Sgsm1, Gna13, Rasip1, Arap3, Tbc1d20, Arhgap1, Gnb1, Tbck, Dock7, Amot, Adap2, Tbc1d15, Tbc1d5, Rap1gds1, Ralgapa1, Agrn, Gnl2, Asap3, Chn1, Ralgapb, Sgsm3,
GO:0065003	macromolecular complex as	0.04282 ( 99 of 2312 genes )	0.02582 ( 878 of 34011 annotated genes )	2.544e-07	0.0008938	Ift122, Cenpt, Nrg1, Pam, Gnb2l1, Dok7, Mpp7, Kcnma1, Atl1, Tubb6, Atf7ip, Tsc1, Spag9, Patl1, Aldob, Scara5, Gopc, Flna, Pex14, Map3k1, Nbr1, Ap2b1, Hr, Kirrel, H2-DMa, Jmy, Mbnl1, Smarca2, Slit2, Nefl, Rrn3, Evl, Slc1a1, Fhad1, Pdss1, Lsm14a, Trp73, Eln, Ccl5, Arpc2, Olfm1, Diap2, Fert2, Atl2, Ccdc88c, Tpm1, Pogz, Cd74, Gchfr, Vasp, Traf2, Creb1, Tubb4, Clgn, Tarbp2, Cdk5, Spast, Gsk3b, Shmt1, …
GO:0070838	divalent metal ion transp	0.01903 ( 44 of 2312 genes )	0.00847 ( 288 of 34011 annotated genes )	2.576e-07	0.0009051	Slc39a14, Trpm4, Prkcb, Cdk5, Jsrp1, Catsper4, Cacna1h, Cacna2d3, Catsper2, Trpm6, Camk2b, Ryr3, Mchr1, Atp2a2, Tusc3, Casq2, Slc39a4, Trpv2, Cacna2d1, Panx1, Tpcn1, Plcg1, Catsper1, Tmem66, Ppp3ca, Slc8a3, Atp2c1, Cacna1s, Inpp5k, Slc39a13, Cacna1f, Aqp2, Asph, Bhlha15, Cacnb3, Ccl5, Gcg, Fkbp1b, Cdh23, Ryr1, Ryr2, Cacna1e, Lyn, Plcg2,
GO:0045934	negative regulation of nu	0.04369 ( 101 of 2312 genes )	0.02652 ( 902 of 34011 annotated genes )	2.683e-07	0.0009424	Terf2ip, Brca2, Pparg, Ctcf, Zfp295, Nrg1, Sp3, Brd7, Msh2, Dnmt3a, Zfp354a, 2410016O06Rik, Cpeb2, Rfx5, Nfib, Clspn, Atf7ip, Smarce1, Pds5a, Zfp12, Trps1, Fabp4, Rbfox2, Stra8, Baz2a, Rbbp7, Pex14, Rps3, Ubtf, Nfix, Maged1, Hr, Fgfr1, Smyd1, Smarca2, Nipbl, Uty, Klf4, Ripply3, Inpp5k, Ilf3, Tcfcp2l1, Stag2, Rbm10, Tet1, Trp73, Rbbp8, Per1, Setd8, Ankrd1, Ccl5, Hipk3, Dnmt3b, Fbxw11, Dmrt1, Ikzf4…
GO:0009894	regulation of catabolic p	0.02638 ( 61 of 2312 genes )	0.01353 ( 460 of 34011 annotated genes )	2.708e-07	0.0009515	Rgs9, Dedd, Arfgap1, Rasgrp3, Arap2, Nrg1, Gsk3b, Serpine2, Arhgap27, Disc1, Pnpt1, Gnb2l1, Rab3a, Faf1, Cpeb2, Hdac4, Bat3, Mapt, Tsc1, Arhgef7, Tbc1d9, Aldob, Flna, Rgs14, Ppp1r3c, Ipcef1, Ntrk2, Ptpn3, Rab6, Asb9, Wac, Sgsm1, Rasip1, Arap3, Cul4b, Tbc1d20, Arhgap1, Ppp1cb, Tbck, Dock7, Amot, Adap2, Tbc1d15, Tbc1d5, Rap1gds1, Ppp1r3b, Pacsin3, Ralgapa1, Ahsa1, Agrn, Tnnt3, Tnnt2, Asap3, Furin, …
GO:0043269	regulation of ion transpo	0.02076 ( 48 of 2312 genes )	0.00964 ( 328 of 34011 annotated genes )	2.818e-07	0.0009901	Trpm4, Dpp6, Jsrp1, Serpine2, Kcnc3, Catsper4, Gnas, Cacna1h, Cacna2d3, Catsper2, Mchr1, Kcnma1, Casq2, Scn9a, Sgk1, Trpv2, Cacna2d1, Scn4a, Tpcn1, Hsd3b6, Catsper1, Atp4b, Prss8, Nedd4l, Kcnu1, Cacna1s, Tomm40, Slc9a3r1, Inpp5k, Cacna1f, Slc9a3, Aqp2, Ahcyl1, Asph, Cacnb3, Scn10a, Ccl5, Gcg, Fkbp1b, Ryr1, Scn3a, Ryr2, Cacna1e, Lyn, Ros1, Plcg2, Kcnj6, Kcnk2,
GO:0042127	regulation of cell prolif	0.04974 ( 115 of 2312 genes )	0.03140 ( 1068 of 34011 annotated genes )	3.096e-07	0.001088	Brca2, Erbb3, Pdgfra, Pparg, Trpm4, Nrg1, Brd7, Frzb, Disc1, Birc6, Areg, Fzd7, Mark4, Krit1, Ptprf, Ptpn6, Rptor, Nfib, Adora2b, Agtr1a, Tsc1, Fgf21, Plac8, Fabp4, Anxa1, Ccdc88a, Morc3, Efnb1, Scg2, Maged1, Fgfr1, Smarca2, Lect1, Slit2, Frs2, Klf4, Fktn, Ctla4, Hoxa3, Tgfbr1, Rbm10, Ccl5, Itgb3, Ptpru, Dhcr7, Fbxw4, Lifr, Csf3, Serpinf1, Lyn, Il12a, Ppp2r5c, Cd74, Uts2, Il7, Inhba, Vash1, Serpi…
GO:0048584	positive regulation of re	0.04455 ( 103 of 2312 genes )	0.02729 ( 928 of 34011 annotated genes )	3.117e-07	0.001095	Terf2ip, Apbb1, Pdgfra, Trpm4, Prkcb, Nrg1, Disc1, Mink1, Tnks2, Ptpn6, Rptor, Adora2b, Fgf21, Spag9, Plcg1, Fabp4, Flna, Hc, Sulf2, Dkk2, Itsn1, Dixdc1, Scg2, Rspo1, Dscam, H2-DMa, Tnfrsf19, Fgfr1, H2-K1, Afap1l2, Slit2, Nlrc5, Ctla4, Lepr, Itga8, Hyal2, Tgfbr1, Zfp622, Ubr5, Cacnb3, Pde6h, Rbck1, Gcg, Ankrd1, Ccl5, Itgb3, Alb, Lyn, Il12a, Cd74, Tbk1, Uts2, Traf2, Ankrd6, Inhba, Stra6, Cdc73, Ma…
GO:0019941	modification-dependent pr	0.01903 ( 44 of 2312 genes )	0.00853 ( 290 of 34011 annotated genes )	3.14e-07	0.001103	Skp1a, Rnf103, Ufd1l, Disc1, Ube2w, Chfr, Gnb2l1, Usp8, Zmpste24, Hsp90b1, Usp37, Bat3, Ube2d1, Usp24, Usp42, Os9, Ube3c, Rbbp6, Usp7, Usp53, Usp15, Wac, Map3k1, Nedd4l, Cul4b, Cul1, Hectd1, Herc3, Ubr1, Ubr5, Rbck1, Rnf187, Usp45, Cd2ap, Hectd2, Wwp2, Usp20, Cul2, Cyld, Fbxw11, Nub1, Usp44, Ppp2r5c, Usp9x,
GO:0072511	divalent inorganic cation	0.01903 ( 44 of 2312 genes )	0.00856 ( 291 of 34011 annotated genes )	3.463e-07	0.001216	Slc39a14, Trpm4, Prkcb, Cdk5, Jsrp1, Catsper4, Cacna1h, Cacna2d3, Catsper2, Trpm6, Camk2b, Ryr3, Mchr1, Atp2a2, Tusc3, Casq2, Slc39a4, Trpv2, Cacna2d1, Panx1, Tpcn1, Plcg1, Catsper1, Tmem66, Ppp3ca, Slc8a3, Atp2c1, Cacna1s, Inpp5k, Slc39a13, Cacna1f, Aqp2, Asph, Bhlha15, Cacnb3, Ccl5, Gcg, Fkbp1b, Cdh23, Ryr1, Ryr2, Cacna1e, Lyn, Plcg2,
GO:0031346	positive regulation of ce	0.01254 ( 29 of 2312 genes )	0.00453 ( 154 of 34011 annotated genes )	3.647e-07	0.001281	Dixdc1, Dscam, Fgfr1, Serpine2, Disc1, Reln, Nefl, Camk2b, Ilk, 2400003C14Rik, Sema7a, Ltk, Cntn1, Ptprd, Tgfbr1, Ptprf, Mark2, Sgk1, Trpv2, Tnfrsf12a, Mapt, Ankrd1, Htr7, Fnbp1l, Myo3b, Lyn, Itgb1, Prkci, Ntrk2,
GO:0010811	positive regulation of ce	0.00692 ( 16 of 2312 genes )	0.00162 ( 55 of 34011 annotated genes )	3.705e-07	0.001302	Ptprj, Fbln2, Cd36, Abi3bp, Gsk3b, Disc1, Plekha2, Jak2, Ilk, Sdc4, Tsc1, Npnt, Edil3, Ccdc80, Itgb1, Hsd17b12,
GO:0007160	cell-matrix adhesion	0.01081 ( 25 of 2312 genes )	0.00356 ( 121 of 34011 annotated genes )	3.728e-07	0.00131	Ptprj, Col5a3, Cd36, Cdk5, Gsk3b, Disc1, Mink1, Itga2b, Macf1, Plekha2, Ilk, Vwa2, Pxn, Itgb2l, Sdc4, Onecut2, Col3a1, Tsc1, Itgb3, Npnt, Epdr1, Itgb1, Itgb7, Jam3, Itgb4,
GO:0030036	actin cytoskeleton organi	0.02249 ( 52 of 2312 genes )	0.01094 ( 372 of 34011 annotated genes )	3.978e-07	0.001397	Vasp, Pdgfra, Cdc42bpa, Cdk5, Pam, Cald1, Ezr, Mink1, Arpc3, Abr, Capza2, Ilk, Shroom2, Sdc4, Hsp90b1, Grb2, Tsc1, Ush1c, Csf1r, Flii, Limch1, Flna, Itgb1, Prkci, Ccdc88a, Jam3, Mybpc3, Dixdc1, Map3k1, Ssh3, Neb, Kirrel, Jmy, Pdlim7, Atp2c1, Slit2, Coro2a, Slc9a3r1, Inpp5k, Amot, Celsr1, Aqp2, Evl, Rap1gds1, Eln, Arpc2, Diap2, Fert2, Tnnt2, Spna2, Tpm1, Rock2,
GO:0006886	intracellular protein tra	0.02811 ( 65 of 2312 genes )	0.01494 ( 508 of 34011 annotated genes )	4.111e-07	0.001444	Gga1, Pard3, Tacc3, Fzd7, Pex26, Rab13, Scarb2, Nup214, Ap2a1, Rab2a, Stx5a, Gnptg, Tom1l2, Hsp90ab1, Flna, Pex14, Copb1, Rab6, Rph3a, Ppp3r1, Ppp3ca, Ap2b1, Kpna4, Nbea, Inpp5k, Hyal2, Tgfbr1, Ahcyl1, Ubr5, Myo6, Rbck1, Rab1, Ap3b2, Fbxw11, Cd74, Gsk3b, Cdk5, Tnpo1, Rpain, Cltc, Macf1, Faf1, Sytl2, Nop58, Rab27a, Bard1, Copg2, Os9, Ppp1r3c, Ank1, Itgb1, Ap2s1, Tnfrsf1a, Cd36, Ap2a2, Tomm40, Jak2…
GO:0032409	regulation of transporter	0.00779 ( 18 of 2312 genes )	0.00203 ( 69 of 34011 annotated genes )	4.298e-07	0.00151	Jsrp1, Cacna1s, Cacna1h, Cacna2d3, Slc9a3r1, Cacna1f, Ahcyl1, Casq2, Cacnb3, Cacna2d1, Fkbp1b, Ryr1, Mll1, Wwp2, Pon1, Cacna1e, Catsper1, Plcg2,
GO:0051130	positive regulation of ce	0.02768 ( 64 of 2312 genes )	0.01464 ( 498 of 34011 annotated genes )	4.309e-07	0.001514	Brd7, Disc1, Gnb2l1, Camk2b, 2400003C14Rik, Mpp7, Ltk, Ptprd, Ptprf, Sdc4, Tnfrsf12a, Tsc1, Myo3b, Anxa1, Dixdc1, Map3k1, Dscam, Kirrel, Jmy, Fgfr1, Nipbl, Nefl, Tgfbr1, Tulp1, Evl, Ankrd1, Arpc2, Htr7, Fert2, Fnbp1l, Mib1, Lyn, Dnmt3b, Dmrt1, Smc5, Creb1, Gsk3b, Serpine2, Ide, Abr, Col1a1, Faf1, Scyl2, Ilk, Cntn1, Sema7a, Sgk1, Grb2, Smad2, Trpv2, Mapt, Prkci, Ank1, Itgb1, Ntrk2, Doc2b, Ptprj, C…
GO:0007018	microtubule-based movemen	0.01081 ( 25 of 2312 genes )	0.00359 ( 122 of 34011 annotated genes )	4.393e-07	0.001543	Ttll1, Kif15, Arhgap21, Dnahc2, Dnaic1, Tubb4, Kif20b, Dst, Kif2a, Kif9, Ift46, Nefl, Kif5a, Dnahc3, Dync2h1, Kif24, Tubb6, Mapt, Ttc21b, Kif5b, Arl3, Dnahc10, Hydin, Dnahc5, Pex14,
GO:0006511	ubiquitin-dependent prote	0.01860 ( 43 of 2312 genes )	0.00835 ( 284 of 34011 annotated genes )	4.507e-07	0.001583	Skp1a, Rnf103, Ufd1l, Disc1, Ube2w, Chfr, Gnb2l1, Usp8, Hsp90b1, Usp37, Bat3, Ube2d1, Usp24, Usp42, Os9, Ube3c, Rbbp6, Usp7, Usp53, Usp15, Wac, Map3k1, Nedd4l, Cul4b, Cul1, Hectd1, Herc3, Ubr1, Ubr5, Rbck1, Rnf187, Usp45, Cd2ap, Hectd2, Wwp2, Usp20, Cul2, Cyld, Fbxw11, Nub1, Usp44, Ppp2r5c, Usp9x,
GO:0010959	regulation of metal ion t	0.01384 ( 32 of 2312 genes )	0.00535 ( 182 of 34011 annotated genes )	4.715e-07	0.001656	Prss8, Nedd4l, Dpp6, Jsrp1, Serpine2, Cacna1s, Gnas, Cacna1h, Cacna2d3, Inpp5k, Slc9a3r1, Cacna1f, Slc9a3, Mchr1, Aqp2, Ahcyl1, Casq2, Asph, Cacnb3, Sgk1, Trpv2, Cacna2d1, Gcg, Ccl5, Fkbp1b, Ryr1, Ryr2, Hsd3b6, Cacna1e, Lyn, Catsper1, Plcg2,
GO:0051172	negative regulation of ni	0.04369 ( 101 of 2312 genes )	0.02687 ( 914 of 34011 annotated genes )	4.973e-07	0.001747	Terf2ip, Brca2, Pparg, Ctcf, Zfp295, Nrg1, Sp3, Brd7, Msh2, Dnmt3a, Zfp354a, 2410016O06Rik, Cpeb2, Rfx5, Nfib, Clspn, Atf7ip, Smarce1, Pds5a, Zfp12, Trps1, Fabp4, Rbfox2, Stra8, Baz2a, Rbbp7, Pex14, Rps3, Ubtf, Nfix, Maged1, Hr, Fgfr1, Smyd1, Smarca2, Nipbl, Uty, Klf4, Ripply3, Inpp5k, Ilf3, Tcfcp2l1, Stag2, Rbm10, Tet1, Trp73, Rbbp8, Per1, Setd8, Ankrd1, Ccl5, Hipk3, Dnmt3b, Fbxw11, Dmrt1, Ikzf4…
GO:0006342	chromatin silencing	0.00476 ( 11 of 2312 genes )	0.00079 ( 27 of 34011 annotated genes )	5.601e-07	0.001968	Ubtf, Tet1, Apobec1, Phf8, Uty, Cbx8, Mll2, Hells, Dnmt3a, Dnmt3b, Baz2a,
GO:0046039	GTP metabolic process	0.02119 ( 49 of 2312 genes )	0.01017 ( 346 of 34011 annotated genes )	5.759e-07	0.002023	Rgs9, Arfgap1, Tubb4, Rasgrp3, Arap2, Gsk3b, Nras, Arhgap27, Gnas, Rras, Gnb2l1, Rab3a, Rab21, Cpeb2, Rab13, Atl1, Gnat2, Tubb6, Rab2a, Tsc1, Arhgef7, Tbc1d9, Rgs14, Ipcef1, Mx1, Ntrk2, Rab6, Rab34, Sgsm1, Gna13, Rasip1, Arap3, Tbc1d20, Arhgap1, Gnb1, Tbck, Dock7, Amot, Adap2, Tbc1d15, Tbc1d5, Rap1gds1, Ralgapa1, Agrn, Gnl2, Asap3, Chn1, Ralgapb, Sgsm3,
GO:0031327	negative regulation of ce	0.04498 ( 104 of 2312 genes )	0.02805 ( 954 of 34011 annotated genes )	6.398e-07	0.002248	Brca2, Pparg, Ctcf, Zfp295, Nrg1, Sp3, Brd7, Eif2b4, Gnb2l1, Dnmt3a, Zfp354a, 2410016O06Rik, Cpeb2, Rfx5, Nfib, Clspn, Atf7ip, Smarce1, Tsc1, Pds5a, Patl1, Zfp12, Trps1, Fabp4, Rbfox2, Stra8, Baz2a, Rbbp7, Pex14, Ubtf, Nfix, Maged1, Hr, Fgfr1, Smyd1, Igf2bp1, Smarca2, Nipbl, Cpeb3, Uty, Klf4, Ripply3, Inpp5k, Ilf3, Tcfcp2l1, Stag2, Rbm10, Tet1, Trp73, Rbbp8, Per1, Setd8, Ankrd1, Hipk3, Dnmt3b, Fb…
GO:0007507	heart development	0.02249 ( 52 of 2312 genes )	0.01111 ( 378 of 34011 annotated genes )	6.542e-07	0.002298	Ift122, Erbb3, Pdgfra, Col5a1, Dll4, Nrg1, Stra6, Ephb4, Foxp4, Tead1, Pbrm1, Trp53bp2, Stk4, Gab1, Myl3, Smad2, Agtr1a, Med12, Tsc1, Vcam1, Adrbk1, Hey2, Itgb1, Mybpc3, Ptprj, Ppp3r1, Col11a1, Smyd1, Fgfr1, Nipbl, Uty, Frs2, Ripply3, Adap2, Whsc1, Tgfbr1, Nfatc4, Luzp1, Erbb4, AW551984, Dicer1, Col3a1, Ankrd1, Ahi1, Ryr1, Tnnt2, Ryr2, Mib1, Acvr1, Rbm15, Sox11, Tpm1,
GO:0006461	protein complex assembly	0.03676 ( 85 of 2312 genes )	0.02164 ( 736 of 34011 annotated genes )	6.641e-07	0.002333	Ift122, Cenpt, Nrg1, Pam, Gnb2l1, Dok7, Mpp7, Kcnma1, Atl1, Tubb6, Atf7ip, Tsc1, Spag9, Aldob, Scara5, Gopc, Flna, Pex14, Map3k1, Nbr1, Ap2b1, Hr, Kirrel, H2-DMa, Jmy, Slit2, Nefl, Rrn3, Evl, Slc1a1, Fhad1, Pdss1, Trp73, Eln, Ccl5, Arpc2, Olfm1, Diap2, Fert2, Atl2, Ccdc88c, Tpm1, Pogz, Cd74, Gchfr, Vasp, Traf2, Creb1, Clgn, Tubb4, Cdk5, Gsk3b, Spast, Shmt1, Ide, Kcnc3, Pnpt1, Arpc3, Col1a1, Faf1,…
GO:0070271	protein complex biogenesi	0.03676 ( 85 of 2312 genes )	0.02167 ( 737 of 34011 annotated genes )	7.024e-07	0.002468	Ift122, Cenpt, Nrg1, Pam, Gnb2l1, Dok7, Mpp7, Kcnma1, Atl1, Tubb6, Atf7ip, Tsc1, Spag9, Aldob, Scara5, Gopc, Flna, Pex14, Map3k1, Nbr1, Ap2b1, Hr, Kirrel, H2-DMa, Jmy, Slit2, Nefl, Rrn3, Evl, Slc1a1, Fhad1, Pdss1, Trp73, Eln, Ccl5, Arpc2, Olfm1, Diap2, Fert2, Atl2, Ccdc88c, Tpm1, Pogz, Cd74, Gchfr, Vasp, Traf2, Creb1, Clgn, Tubb4, Cdk5, Gsk3b, Spast, Shmt1, Ide, Kcnc3, Pnpt1, Arpc3, Col1a1, Faf1,…
GO:0048514	blood vessel morphogenesi	0.02379 ( 55 of 2312 genes )	0.01205 ( 410 of 34011 annotated genes )	7.109e-07	0.002497	Pdgfra, Ptprb, Prkcb, Dll4, Vash1, Stra6, Ephb4, Rras, Krit1, Pbrm1, Stk4, Figf, Apob, Adora2b, Tnfrsf12a, Hey2, Plcg1, Pik3ca, Hc, Itgb1, Ntrk2, Jam3, Sgpl1, Sema4a, Ptprj, Bai1, Tnfrsf1a, Scg2, Ppp3r1, Gna13, Rasip1, Cd36, Fgfr1, Lect1, Slit2, Klf4, Pik3r6, Amot, Ctsh, Enpep, Lepr, Tgfbr1, Nfatc4, Dicer1, Qk, Col3a1, Ccl5, Rbm15, Serpinf1, Acvr1, Gtf2i, Tspan12, Uts2, C6, Rock2,
GO:0032259	methylation	0.01557 ( 36 of 2312 genes )	0.00653 ( 222 of 34011 annotated genes )	7.236e-07	0.002542	Ctcf, Nsun7, Gsk3b, Ftsjd1, Dnmt3l, Gnas, Ash2l, Dnmt3a, Etf1, Pcmt1, Mll5, Suv420h1, Piwil4, Atf7ip, Hells, Pik3ca, Baz2a, Rab6, Rnmtl1, Tfb2m, Hnmt, 6430573F11Rik, Tdrd9, Ilf3, Whsc1, Dot1l, Prmt1, Comtd1, Mettl1, Setd8, Suz12, Mll1, 4832428D23Rik, Mll2, Dnmt3b, Mll3,
GO:0045860	positive regulation of pr	0.01990 ( 46 of 2312 genes )	0.00938 ( 319 of 34011 annotated genes )	7.541e-07	0.002649	Ercc6, Erbb3, Traf2, Nrg1, Cdk5, Map2k3, Map2k2, Dok7, Ilk, Stk4, Gab1, Map3k5, Rptor, Clspn, Sdc4, Agtr1a, Dgkq, Spag9, Csf1r, Hsp90ab1, Ccdc88a, Taok1, Map3k1, Maged1, Afap1l2, Fgfr1, Ghr, Reln, Frs2, Pik3r6, Araf, Jak2, Ikbkg, Tgfbr1, Pxn, Trp73, Lpar1, Ccny, Pde6h, Itgb3, Cartpt, Ccl5, Gcg, Mapk8ip3, Magi3, Cd74,
GO:0009967	positive regulation of si	0.03287 ( 76 of 2312 genes )	0.01879 ( 639 of 34011 annotated genes )	8.388e-07	0.002947	Terf2ip, Pdgfra, Trpm4, Prkcb, Nrg1, Disc1, Mink1, Tnks2, Ptpn6, Rptor, Fgf21, Spag9, Flna, Sulf2, Dkk2, Itsn1, Dixdc1, Rspo1, Tnfrsf19, Afap1l2, Fgfr1, Nlrc5, Lepr, Itga8, Tgfbr1, Zfp622, Ubr5, Pde6h, Rbck1, Gcg, Ankrd1, Ccl5, Itgb3, Lyn, Il12a, Cd74, Ankrd6, Inhba, Cdc73, Col1a1, Macf1, Ilk, Sema7a, Hes5, Gab1, Bnip2, Ptgir, Cbl, Smad2, Peli1, Csf1r, Itgb1, Ryk, Ntrk2, Taok1, Ptprj, Tnfrsf1a, C…
GO:0031344	regulation of cell projec	0.01817 ( 42 of 2312 genes )	0.00826 ( 281 of 34011 annotated genes )	8.644e-07	0.003037	Cdk5, Gsk3b, Serpine2, Disc1, Ift46, Camk2b, 2400003C14Rik, Ilk, Sema7a, Ltk, Cntn1, Ptprd, Ptprf, Sgk1, Trpv2, Tnfrsf12a, Mapt, Myo3b, Itgb1, Prkci, Ntrk2, Ryk, Ccdc88a, Dixdc1, Kndc1, Ssh3, Dscam, Kalrn, Fgfr1, Slit2, Reln, Nefl, Tgfbr1, Mark2, Lpar1, Ankrd1, Htr7, Fert2, Chn1, Fnbp1l, Lyn, Kbtbd10,
GO:0022414	reproductive process	0.04152 ( 96 of 2312 genes )	0.02555 ( 869 of 34011 annotated genes )	9.602e-07	0.003373	Brca2, Pdgfra, Spata5, Prss28, Sp3, Frzb, Eif2b4, Areg, Fzd7, Msh2, Cacna1h, Catsper2, Camk2b, Dnmt3a, Zp1, Zp3r, Spata20, Atp1a4, Sbf1, Adrbk1, Usp42, Pdilt, Hbxip, Gopc, Stra8, Spin4, Catsper1, Psap, Strbp, Map3k1, Cast, Nipbl, Frs2, Inpp5k, Tdrd9, Trim36, Izumo1, Hyal2, Oca2, Tgfbr1, Nlrx1, Aplp2, Ccl5, Diap2, Gmcl1, Aprt, Zscan2, Serpinf1, Ros1, Dmrt1, Dedd, Creb1, Clgn, Tarbp2, Inhba, Serpin…
GO:0032940	secretion by cell	0.02984 ( 69 of 2312 genes )	0.01658 ( 564 of 34011 annotated genes )	9.67e-07	0.003397	Dio2, Apbb1, Pcsk1, Prkcb, Pam, Cacna1h, Adora2b, Agtr1a, Xbp1, Adrbk1, Exoc5, Plcg1, Hc, Anxa1, Pfkfb2, Pim3, Exoc3, Ppp3ca, Ap2b1, Scfd2, Mical3, Trim36, Hyal2, Slc18a1, Myo6, Gcg, Ankrd1, Ccl5, Htr7, Hmgn3, Nlrp1a, Lyn, Lrp2, Tac4, Uts2, Gm885, Pi4k2a, Traf2, Creb1, Pclo, Slc18a2, Inhba, Cdk5, Serpine2, Kcnc3, Abr, Rab3a, Sytl2, Smad2, Rab27a, Panx1, Csf1r, Ntrk2, Doc2b, Vtcn1, Stxbp5, Srebf1,…
GO:0044257	cellular protein cataboli	0.02033 ( 47 of 2312 genes )	0.00976 ( 332 of 34011 annotated genes )	9.797e-07	0.003442	Skp1a, Rnf103, Ufd1l, Disc1, Ide, Ube2w, Chfr, Gnb2l1, Usp8, Zmpste24, Hsp90b1, Usp37, Bat3, Usp24, Ube2d1, Usp42, Os9, Ube3c, Rbbp6, Usp7, Usp53, Usp15, Wac, Map3k1, Nedd4l, Cul4b, Cul1, Hectd1, Herc3, Ubr1, Ubr5, Clpx, Rbck1, Rnf187, Usp45, Cd2ap, Hectd2, Furin, Wwp2, Usp20, Cul2, Cyld, Fbxw11, Nub1, Usp44, Ppp2r5c, Usp9x,
GO:0051603	proteolysis involved in c	0.01990 ( 46 of 2312 genes )	0.00950 ( 323 of 34011 annotated genes )	1.074e-06	0.003773	Skp1a, Rnf103, Ufd1l, Disc1, Ide, Ube2w, Chfr, Gnb2l1, Usp8, Zmpste24, Hsp90b1, Usp37, Bat3, Usp24, Ube2d1, Usp42, Os9, Ube3c, Rbbp6, Usp7, Usp53, Usp15, Wac, Map3k1, Nedd4l, Cul4b, Cul1, Hectd1, Herc3, Ubr1, Ubr5, Clpx, Rbck1, Rnf187, Usp45, Cd2ap, Hectd2, Wwp2, Usp20, Cul2, Cyld, Fbxw11, Nub1, Usp44, Ppp2r5c, Usp9x,
GO:0007423	sensory organ development	0.02552 ( 59 of 2312 genes )	0.01347 ( 458 of 34011 annotated genes )	1.106e-06	0.003887	Megf11, Ift122, Pdgfra, Col5a1, Inhba, Sp3, Tulp3, Frzb, Stra6, Abr, Sobp, Cux1, Hes5, Kcnma1, Pax6, Shroom2, Gjb6, Cnga3, Gnat2, Rpl24, Hey2, Ush1c, Igfbp7, Mpv17, Osr2, Prkci, Ntrk2, Mcoln3, Dixdc1, Map3k1, Col11a1, Nphp1, Dscam, H2-DMa, H2-K1, Fgfr1, Nipbl, Otx1, Cacna1s, Gnb1, Klf4, Frs2, Rorb, Celsr1, Cacna1f, Crx, Itga8, Tgfbr1, Tulp1, Myo6, Dicer1, Tmie, Bmp7, Ahi1, Cdh23, Bmpr1b, Sox11, O…
GO:0009605	response to external stim	0.04196 ( 97 of 2312 genes )	0.02599 ( 884 of 34011 annotated genes )	1.137e-06	0.003996	Apbb1, Unc5b, Mycbp2, Dspp, Pdgfra, Pparg, Trpm4, Boc, Elmo2, Ltk, Cnr2, Kcnma1, Rptor, Nfib, Mll5, Adora2b, Tbr1, Fabp4, Hc, Anxa1, Stra8, Strbp, Efnb1, Scg2, Col11a1, Nbr1, Dscam, Slit2, Klf4, Atg3, H2-Q1, Hyal2, Aqp2, Tulp1, Evl, Gas2l1, Igf2r, Gcg, Ankrd1, Ccl5, Htr7, Fert2, Cdh23, Pde4b, Alb, Serpinf1, Lyn, Cd74, Lama2, Vasp, Cdk5, Wrn, Serpine2, Stra6, Abr, Pik3c2g, Cd276, Sema7a, Figf, Pax…
GO:0010810	regulation of cell-substr	0.00908 ( 21 of 2312 genes )	0.00282 ( 96 of 34011 annotated genes )	1.173e-06	0.004122	Ptprj, Fbln2, Cd36, Abi3bp, Gsk3b, Disc1, Mink1, Fzd7, Macf1, Col1a1, Plekha2, Jak2, Ilk, Sdc4, Onecut2, Tsc1, Npnt, Edil3, Ccdc80, Itgb1, Hsd17b12,
GO:0000003	reproduction	0.04152 ( 96 of 2312 genes )	0.02567 ( 873 of 34011 annotated genes )	1.174e-06	0.004125	Brca2, Pdgfra, Spata5, Prss28, Sp3, Frzb, Eif2b4, Areg, Fzd7, Msh2, Cacna1h, Catsper2, Camk2b, Dnmt3a, Zp1, Zp3r, Spata20, Atp1a4, Sbf1, Adrbk1, Usp42, Pdilt, Hbxip, Gopc, Stra8, Spin4, Catsper1, Psap, Strbp, Map3k1, Cast, Nipbl, Frs2, Inpp5k, Tdrd9, Trim36, Izumo1, Hyal2, Oca2, Tgfbr1, Nlrx1, Aplp2, Ccl5, Diap2, Gmcl1, Aprt, Zscan2, Serpinf1, Ros1, Dmrt1, Dedd, Creb1, Clgn, Tarbp2, Inhba, Serpin…
GO:0006200	ATP catabolic process	0.00995 ( 23 of 2312 genes )	0.00329 ( 112 of 34011 annotated genes )	1.203e-06	0.004227	Ino80, Atp4b, Atp5j2, Kif20b, Wrn, Atp2c1, Atp7a, Ide, Top2a, Msh2, Macf1, Top1, Ola1, Abca2, Ascc3, Atp2a2, Clpx, Atp1a4, Polq, Atf7ip, Abca4, Tnnt2, Ddx3x,
GO:0031329	regulation of cellular ca	0.02292 ( 53 of 2312 genes )	0.01164 ( 396 of 34011 annotated genes )	1.204e-06	0.004231	Rgs9, Arfgap1, Rasgrp3, Arap2, Gsk3b, Arhgap27, Disc1, Pnpt1, Gnb2l1, Rab3a, Cpeb2, Hdac4, Bat3, Mapt, Tsc1, Arhgef7, Tbc1d9, Aldob, Rgs14, Ppp1r3c, Ipcef1, Ntrk2, Ptpn3, Rab6, Wac, Sgsm1, Rasip1, Arap3, Tbc1d20, Arhgap1, Ppp1cb, Tbck, Dock7, Amot, Adap2, Tbc1d15, Tbc1d5, Rap1gds1, Ppp1r3b, Pacsin3, Ralgapa1, Ahsa1, Agrn, Tnnt3, Tnnt2, Asap3, Furin, Chn1, Ralgapb, Sgsm3, Nub1, Tpm1, Usp44,
GO:0051651	maintenance of location i	0.00865 ( 20 of 2312 genes )	0.00262 ( 89 of 34011 annotated genes )	1.336e-06	0.004694	Brca2, Arhgap21, Tacc3, Ciz1, Faf1, Fbn2, Hook3, Taf8, Fth1, Os9, Sun2, Alb, Grinl1a, Flna, Syne2, Sgol1, Clasp1, Pex14, Morc3, Tln2,
GO:0045892	negative regulation of tr	0.03893 ( 90 of 2312 genes )	0.02379 ( 809 of 34011 annotated genes )	1.555e-06	0.005464	Pparg, Ctcf, Zfp295, Nrg1, Sp3, Brd7, Dnmt3a, Zfp354a, 2410016O06Rik, Rfx5, Nfib, Atf7ip, Smarce1, Zfp12, Trps1, Fabp4, Rbfox2, Baz2a, Rbbp7, Pex14, Ubtf, Nfix, Maged1, Hr, Fgfr1, Smyd1, Smarca2, Nipbl, Uty, Klf4, Ripply3, Inpp5k, Ilf3, Tcfcp2l1, Rbm10, Tet1, Trp73, Rbbp8, Per1, Setd8, Ankrd1, Hipk3, Dnmt3b, Fbxw11, Dmrt1, Ikzf4, Dedd, Ciita, Creb1, Dll4, Cdk5, Sox5, Gsk3b, Eid1, Cdc73, Dnmt3l, F…
GO:0006140	regulation of nucleotide	0.02119 ( 49 of 2312 genes )	0.01053 ( 358 of 34011 annotated genes )	1.571e-06	0.00552	Rgs9, Arfgap1, Rasgrp3, Arap2, Gsk3b, Arhgap27, Gnas, Gnb2l1, Rab3a, Cpeb2, Adora2b, Ptgir, Tsc1, Arhgef7, Tbc1d9, Grm3, Aldob, Rxfp2, Flna, Rgs14, Ipcef1, Ntrk2, Rab6, Sgsm1, Gna13, Rasip1, Arap3, Tbc1d20, Arhgap1, Tbck, Slc9a3r1, Dock7, Amot, Adap2, Tbc1d15, Tbc1d5, Rap1gds1, Gcg, Ahsa1, Ralgapa1, Agrn, Htr7, Tnnt3, Tnnt2, Asap3, Chn1, Ralgapb, Sgsm3, Tpm1,
GO:0002376	immune system process	0.05666 ( 131 of 2312 genes )	0.03822 ( 1300 of 34011 annotated genes )	1.757e-06	0.006171	Slamf1, Pparg, Tacc3, Trpm4, Prkcb, Sp3, Fzd7, Msh2, Pms2, Map3k5, Adora2b, Lgals8, Rbfox2, Anxa1, Scg2, H2-K1, Atp7a, Slit2, Nlrc5, Eomes, Hoxa3, Hyal2, Tgfbr1, Gas2l1, Nlrx1, Cacnb3, Rbck1, Ccl5, Itgb3, Fert2, Il12a, Cd74, Gm885, Il7, Traf2, Inhba, Cdc73, Mpo, Jag2, Gnas, Figf, Ncaph2, Pglyrp3, Hmgb3, Bat3, Vcam1, Cr1l, Ank1, Oas3, Vtcn1, Oasl1, B2m, Cd36, Jak2, Exosc5, Akirin2, Tollip, Il1r1, …
GO:0030155	regulation of cell adhesi	0.01644 ( 38 of 2312 genes )	0.00735 ( 250 of 34011 annotated genes )	1.858e-06	0.006527	Erbb3, Abi3bp, Nrg1, Gsk3b, Serpine2, Disc1, Jag2, Mink1, Fzd7, Macf1, Col1a1, Plekha2, Faf1, Ilk, Ppp1r12a, Sdc4, Onecut2, Tsc1, Edil3, Itgb1, Hsd17b12, Spink5, Ptprj, Cyth1, Dscam, Fbln2, Cd36, Klf4, Ppp1cb, Jak2, Ift74, Bmp7, Itgb3, Ccl5, Npnt, Lyn, Il12a, Ccdc80,
GO:0022603	regulation of anatomical	0.02638 ( 61 of 2312 genes )	0.01432 ( 487 of 34011 annotated genes )	1.871e-06	0.006572	Prkcb, Cdk5, Gsk3b, Vash1, Ankrd6, Disc1, Fzd7, Col1a1, Rras, Krit1, Camk2b, 2400003C14Rik, Ilk, Sema7a, Ptprd, Ptprf, Adora2b, Sgk1, Trpv2, Smad2, Tnfrsf12a, Agtr1a, Med12, Mapt, Plcg1, Hc, Ntrk2, Ryk, Sema4a, Bai1, Dixdc1, Tnfrsf1a, Kndc1, Maged1, Dscam, Ssh3, Cd36, Fgfr1, Lect1, Slit2, Reln, Klf4, Frs2, Nefl, Pik3r6, Amot, Celsr1, Ctsh, Mark2, Dicer1, Ccl5, Bmp7, Ahi1, Pofut2, Chn1, Serpinf1, …
GO:0045814	negative regulation of ge	0.00476 ( 11 of 2312 genes )	0.00088 ( 30 of 34011 annotated genes )	1.946e-06	0.006835	Ubtf, Tet1, Apobec1, Phf8, Uty, Cbx8, Mll2, Hells, Dnmt3a, Dnmt3b, Baz2a,
GO:0051270	regulation of cellular co	0.02336 ( 54 of 2312 genes )	0.01214 ( 413 of 34011 annotated genes )	1.972e-06	0.006927	Pdgfra, Dll4, Cdk5, Vash1, Mink1, Map2k2, Macf1, Col1a1, Abr, Rras, Gnb2l1, Krit1, Ilk, Figf, Gab1, Pax6, Onecut2, Spag9, Plcg1, Csf1r, Sun2, Hc, Itgb1, Jam3, Ryk, Sema4a, Ptprj, Map3k1, Gna13, Dscam, Msn, Arap3, Slit2, Klf4, Itga2b, Slc9a3r1, Amot, Jak2, Ctsh, Muc2, Hyal2, Tgfbr1, Erbb4, Lpar1, Itgb3, Ccl5, Ptpru, Fert2, Furin, Lyn, Unc5c, Syne2, Uts2, Cd74,
GO:0010975	regulation of neuron proj	0.01557 ( 36 of 2312 genes )	0.00682 ( 232 of 34011 annotated genes )	2.102e-06	0.007383	Cdk5, Gsk3b, Serpine2, Disc1, Camk2b, 2400003C14Rik, Ilk, Sema7a, Ltk, Cntn1, Ptprd, Ptprf, Sgk1, Trpv2, Tnfrsf12a, Mapt, Itgb1, Prkci, Ntrk2, Ryk, Ccdc88a, Dixdc1, Kndc1, Ssh3, Dscam, Kalrn, Fgfr1, Slit2, Reln, Nefl, Mark2, Lpar1, Ankrd1, Htr7, Chn1, Lyn,
GO:0032412	regulation of ion transme	0.00649 ( 15 of 2312 genes )	0.00162 ( 55 of 34011 annotated genes )	2.114e-06	0.007427	Cacnb3, Cacna2d1, Jsrp1, Fkbp1b, Cacna1s, Ryr1, Cacna1h, Cacna2d3, Slc9a3r1, Cacna1e, Cacna1f, Catsper1, Plcg2, Ahcyl1, Casq2,
GO:0055080	cation homeostasis	0.02249 ( 52 of 2312 genes )	0.01156 ( 393 of 34011 annotated genes )	2.128e-06	0.007475	Slc39a14, Pdgfra, Prkcb, Disc1, Gnas, Pygm, Ryr3, Mchr1, Atp2a2, Kcnma1, Casq2, Slc39a4, Sfxn5, Aco1, Bdh2, Atp1a4, Sgk1, Agtr1a, Bank1, Scara5, Sfxn4, Hc, Itgb1, Atp4b, Gna13, Slc4a10, Slc8a3, Atp2c1, Atp7a, Sv2a, Gnb1, Jak2, Slc39a13, Cacna1f, Slc9a3, Asph, Lpar1, Fth1, Aplp2, Itgb3, Ccl5, Abcb7, Fkbp1b, Cdh23, Ryr1, Ryr2, Slc25a37, Bsnd, Lyn, Gtf2i, Plcg2, Uts2,
GO:0051726	regulation of cell cycle	0.02941 ( 68 of 2312 genes )	0.01664 ( 566 of 34011 annotated genes )	2.19e-06	0.007692	Apbb1, Ino80, Brca2, Tacc3, Csnk2a2, Brd7, Msh2, Chfr, Gnb2l1, Camk2b, Eif4e, Nup214, Ptpn6, Dbf4, Clspn, Mll5, Mov10l1, Stra8, Ptpn3, Pim3, Ccnc, Fam5c, Jmy, Afap1l2, Fgfr1, Stag2, Gas2l1, Trp73, Ccny, Rbbp8, 1810031K17Rik, Kntc1, Il12a, Sgsm3, Ppp2r5c, Dmrt1, Pcid2, Smc5, Chordc1, Dst, Vash1, Inhba, Cdk5, Nras, Ccdc52, Cdc73, Pnpt1, Top2a, Mnt, Macf1, Ilk, Son, Sgk1, 5430437P03Rik, Rpl24, Itgb1…
GO:0006629	lipid metabolic process	0.04369 ( 101 of 2312 genes )	0.02779 ( 945 of 34011 annotated genes )	2.24e-06	0.007871	Hsd3b3, Pdgfra, Pparg, Pam, Acoxl, St6galnac6, Cacna1h, Oc90, Sc5d, Abca2, Pigx, Kcnma1, Hsd17b3, Sacm1l, Ip6k2, Adora2b, Slc27a5, Ankrd26, Plcg1, Hsd11b2, Plcb3, Pik3ca, Fabp4, Anxa1, Psap, Cdipt, Pikfyve, Klf4, Inpp5k, Lepr, Elovl5, Pdss1, Smg1, Akr1b7, Inpp4b, Aplp2, Hsd3b2, Lias, Dhcr7, Pigk, Lyn, Gnpat, Cd74, Abcg1, Pi4k2a, Pla2g4d, Pip4k2c, Gdpd4, Creb1, Dctn6, Ptpla, Pigc, Ept1, Pik3c2g, I…
GO:0033124	regulation of GTP catabol	0.01384 ( 32 of 2312 genes )	0.00573 ( 195 of 34011 annotated genes )	2.246e-06	0.007891	Rgs9, Arfgap1, Rasgrp3, Arap2, Gsk3b, Arhgap27, Gnb2l1, Cpeb2, Tsc1, Arhgef7, Tbc1d9, Rgs14, Ipcef1, Ntrk2, Sgsm1, Rasip1, Arap3, Arhgap1, Tbc1d20, Dock7, Tbck, Amot, Adap2, Tbc1d15, Tbc1d5, Rap1gds1, Ralgapa1, Agrn, Asap3, Chn1, Ralgapb, Sgsm3,
GO:0051051	negative regulation of tr	0.01730 ( 40 of 2312 genes )	0.00800 ( 272 of 34011 annotated genes )	2.354e-06	0.00827	Erbb3, Tacc3, Slc18a2, Prtn3, Prkcb, Nrg1, Cdk5, Gsk3b, Serpine2, Yrdc, Abr, Gnb2l1, Faf1, Casq2, Mapt, Bard1, Hsd3b6, Flna, Hc, Anxa1, Pim3, Ppp3ca, Cd36, Nedd4l, Slc15a1, Srebf1, Slc9a3r1, Inpp5k, Wnk1, Slc18a1, Pacsin3, Cartpt, Itgb3, Fkbp1b, Htr7, Wwp2, Cyld, Fbxw11, Uts2, Cd74,
GO:0090066	regulation of anatomical	0.02855 ( 66 of 2312 genes )	0.01605 ( 546 of 34011 annotated genes )	2.492e-06	0.008755	Apbb1, Ino80, Pparg, Nrg1, Frzb, Disc1, Atad3a, Gnb2l1, Tro, 2400003C14Rik, Kcnma1, Rptor, Ip6k2, Adora2b, Tnfrsf12a, Sbf1, Agtr1a, Tsc1, Hsp90ab1, Rbbp7, Map3k1, Dscam, Ssh3, Kirrel, Jmy, Dclk1, Smarca2, Slit2, Nefl, Hyal2, Tgfbr1, Evl, Gas2l1, Trp73, Eln, Arpc2, Fert2, Ros1, Tpm1, Exosc9, Uts2, Il7, Creb1, Inhba, Serpine2, Arpc3, Ilk, Capza2, Sema7a, Shroom2, Sgk1, Grb2, Trpv2, Mapt, Gclm, Igfb…
GO:0006412	translation	0.02379 ( 55 of 2312 genes )	0.01255 ( 427 of 34011 annotated genes )	2.527e-06	0.008877	Eif4e3, Ncbp1, Hars2, Tarbp2, Mrps16, Mrpl20, Pum1, Fam129a, Eif2b4, Eif3m, Eif4e1b, Gnb2l1, Eif4e, Dars2, Lars2, Cpeb2, Etf1, Nars2, Rplp0, Aco1, Piwil4, Eif4a1, Tsc1, Rpl24, Patl1, Elavl1, Qars, Mtrf1l, Mrpl4, Rps3, Fmr1, Lgtn, Tcea3, Mknk2, Mrpl12, Igf2bp1, Rpl5, Lars, Eif4g2, Eef2k, Cpeb3, Rps28, Rps6kb2, Dnajc1, Iars2, Rps4x, Lsm14a, Mrpl51, Qk, Mrps5, Vars, Eif3j, Eif1ax, Sox11, Abcf1,
GO:0060271	cilium morphogenesis	0.00865 ( 20 of 2312 genes )	0.00273 ( 93 of 34011 annotated genes )	2.77e-06	0.009729	Ift122, Ift172, Ttll1, Tmem107, Unc119b, Asap1, Disc1, Tctn3, Dync2h1, Als2cr4, Ocrl, Onecut2, Ahi1, Arl6, Ttc21b, Arl3, Tsga14, Flna, Hydin, Wdr35,
GO:0016337	cell-cell adhesion	0.01817 ( 42 of 2312 genes )	0.00864 ( 294 of 34011 annotated genes )	2.851e-06	0.01002	Megf11, Pard3, Pdgfra, Igsf5, Boc, Serpine2, Mink1, Cldn5, Ptprd, Ptprf, Plekha7, Vcam1, Fat3, Itgb1, Jam3, Mycn, Col11a1, Pcdhb16, Cdh15, Kirrel, Atp2c1, Slit2, Klf4, Itga2b, Jak2, Celsr1, Crnn, Clstn2, Cdhr3, Lmo7, Dscaml1, Bmp7, Itgb3, Ccl5, Ptpru, Npnt, Cdh23, Fert2, Cd2ap, Lyn, Bmpr1b, Mcam,
GO:0030334	regulation of cell migrat	0.02163 ( 50 of 2312 genes )	0.01106 ( 376 of 34011 annotated genes )	2.866e-06	0.01007	Pdgfra, Dll4, Cdk5, Vash1, Mink1, Macf1, Col1a1, Abr, Rras, Gnb2l1, Krit1, Ilk, Figf, Gab1, Pax6, Onecut2, Spag9, Plcg1, Csf1r, Sun2, Hc, Itgb1, Jam3, Sema4a, Ptprj, Map3k1, Gna13, Msn, Arap3, Slit2, Klf4, Itga2b, Slc9a3r1, Amot, Jak2, Ctsh, Muc2, Hyal2, Erbb4, Lpar1, Itgb3, Ccl5, Ptpru, Fert2, Furin, Lyn, Unc5c, Syne2, Uts2, Cd74,
GO:0006305	DNA alkylation	0.00519 ( 12 of 2312 genes )	0.00109 ( 37 of 34011 annotated genes )	2.987e-06	0.01049	Mll5, Piwil4, Ctcf, Atf7ip, Gsk3b, Gnas, Mll1, Hells, Pik3ca, Tdrd9, Dnmt3a, Dnmt3b,
GO:0006306	DNA methylation	0.00519 ( 12 of 2312 genes )	0.00109 ( 37 of 34011 annotated genes )	2.987e-06	0.01049	Mll5, Piwil4, Ctcf, Atf7ip, Gsk3b, Gnas, Mll1, Hells, Pik3ca, Tdrd9, Dnmt3a, Dnmt3b,
GO:0040012	regulation of locomotion	0.02336 ( 54 of 2312 genes )	0.01238 ( 421 of 34011 annotated genes )	3.52e-06	0.01236	Pdgfra, Dll4, Cdk5, Vash1, Mink1, Map2k2, Macf1, Col1a1, Abr, Rras, Gnb2l1, Krit1, Ilk, Figf, Gab1, Pax6, Onecut2, Spag9, Plcg1, Csf1r, Sun2, Hc, Itgb1, Jam3, Ryk, Sema4a, Ptprj, Scg2, Map3k1, Gna13, Dscam, Msn, Arap3, Slit2, Klf4, Itga2b, Slc9a3r1, Amot, Jak2, Ctsh, Muc2, Hyal2, Erbb4, Lpar1, Itgb3, Ccl5, Ptpru, Fert2, Furin, Lyn, Unc5c, Syne2, Uts2, Cd74,
GO:2000145	regulation of cell motili	0.02206 ( 51 of 2312 genes )	0.01147 ( 390 of 34011 annotated genes )	3.731e-06	0.01311	Pdgfra, Dll4, Cdk5, Vash1, Mink1, Map2k2, Macf1, Col1a1, Abr, Rras, Gnb2l1, Krit1, Ilk, Figf, Gab1, Pax6, Onecut2, Spag9, Plcg1, Csf1r, Sun2, Hc, Itgb1, Jam3, Sema4a, Ptprj, Map3k1, Gna13, Msn, Arap3, Slit2, Klf4, Itga2b, Slc9a3r1, Amot, Jak2, Ctsh, Muc2, Hyal2, Erbb4, Lpar1, Itgb3, Ccl5, Ptpru, Fert2, Furin, Lyn, Unc5c, Syne2, Uts2, Cd74,
GO:0043062	extracellular structure o	0.01687 ( 39 of 2312 genes )	0.00788 ( 268 of 34011 annotated genes )	4.049e-06	0.01422	Apbb1, Muc5ac, Pdgfra, Spint1, Col5a1, Abi3bp, Nrg1, Cdk5, Disc1, Pxdn, Col1a1, Dok7, Camk2b, Ilk, Arhgef15, Tsc1, Mpv17, Sulf2, Hsd17b12, Col5a3, Col11a1, Pcdhb16, Atp7a, Cacna1s, Reln, Itga8, Tgfbr1, Myo6, Postn, Erbb4, Apbb2, Col3a1, Aplp2, Col11a2, Eln, Npnt, Agrn, Ccdc80, Gnpat,
GO:0051046	regulation of secretion	0.02292 ( 53 of 2312 genes )	0.01214 ( 413 of 34011 annotated genes )	4.251e-06	0.01493	Apbb1, Erbb3, Pclo, Creb1, Traf2, Pcsk1, Prkcb, Nrg1, Cdk5, Inhba, Pam, Kcnc3, Cacna1h, Abr, Rab3a, Sytl2, Adora2b, Rab27a, Agtr1a, Panx1, Adrbk1, Csf1r, Hc, Anxa1, Ntrk2, Pfkfb2, Pim3, Doc2b, Ppp3ca, Stxbp5, Srebf1, Slc9a3r1, Wnk1, Celsr1, Jak2, Hyal2, Dnajc1, Slc18a1, Myo6, Gcg, Ankrd1, Cartpt, Htr7, Fkbp1b, Hmgn3, Nlrp1a, Cacna1e, Lyn, Sox11, Tac4, Cd74, Uts2, Myrip,
GO:0033365	protein localization to o	0.02033 ( 47 of 2312 genes )	0.01029 ( 350 of 34011 annotated genes )	4.297e-06	0.0151	Terf2ip, Tacc3, Gsk3b, Rpain, Fzd7, Macf1, Col1a1, Faf1, Tnks2, Pex26, Scarb2, Nup214, Pax6, Nop58, Rad21, Bat3, Gnptg, Os9, Sun2, Hsp90ab1, Flna, Pex14, Rab6, Morc3, Tnfrsf1a, Ppp3r1, Ppp3ca, Cd36, Pikfyve, Kpna4, Tomm40, Jak2, Fbn2, Hyal2, Tgfbr1, Ubr5, Rbm22, Erbb4, Hook3, Rbck1, Taf8, Bmp7, Ahi1, Rbpms, Cyld, Syne2, Fbxw11,
GO:0007411	axon guidance	0.01125 ( 26 of 2312 genes )	0.00432 ( 147 of 34011 annotated genes )	4.821e-06	0.01694	Efnb1, Apbb1, Etv1, Unc5b, Mycbp2, Vasp, Dscam, Cdk5, Boc, Lhx3, Slit2, Reln, Evl, Pax6, Alcam, Nfib, Flot1, Apbb2, Tbr1, Rpl24, Bmp7, Chn1, Bmpr1b, Ryk, Mapk8ip3, Lama2,
GO:0016570	histone modification	0.01687 ( 39 of 2312 genes )	0.00794 ( 270 of 34011 annotated genes )	4.853e-06	0.01705	Apbb1, Brca2, Skp1a, Ctcf, Prkcb, Atxn7, Brd7, Eid1, Cdc73, Meaf6, Ash2l, 2410016O06Rik, Phf16, Hdac4, Mll5, Suv420h1, Ube2a, Pcgf1, Kdm2a, Baz2a, Pim3, Wac, Ing5, Nipbl, Tada3, Srebf1, Cbx8, Jak2, Whsc1, Dot1l, Prmt1, Phf8, Setd8, Suz12, Chek1, Mll1, Mll2, Dnmt3b, Mll3,
GO:0032970	regulation of actin filam	0.01211 ( 28 of 2312 genes )	0.00485 ( 165 of 34011 annotated genes )	4.87e-06	0.01711	Dixdc1, Map3k1, Pard3, Neb, Ssh3, Kirrel, Pam, Jmy, Slit2, Arpc3, Inpp5k, Celsr1, Capza2, Ilk, Evl, Shroom2, Sdc4, Grb2, Tsc1, Eln, Arpc2, Fert2, Tnnt2, Csf1r, Ccdc88a, Spna2, Jam3, Tpm1,
GO:0051253	negative regulation of RN	0.03893 ( 90 of 2312 genes )	0.02446 ( 832 of 34011 annotated genes )	4.882e-06	0.01715	Pparg, Ctcf, Zfp295, Nrg1, Sp3, Brd7, Dnmt3a, Zfp354a, 2410016O06Rik, Rfx5, Nfib, Atf7ip, Smarce1, Zfp12, Trps1, Fabp4, Rbfox2, Baz2a, Rbbp7, Pex14, Ubtf, Nfix, Maged1, Hr, Fgfr1, Smyd1, Smarca2, Nipbl, Uty, Klf4, Ripply3, Inpp5k, Ilf3, Tcfcp2l1, Rbm10, Tet1, Trp73, Rbbp8, Per1, Setd8, Ankrd1, Hipk3, Dnmt3b, Fbxw11, Dmrt1, Ikzf4, Dedd, Ciita, Creb1, Dll4, Cdk5, Sox5, Gsk3b, Eid1, Cdc73, Dnmt3l, F…
GO:0032880	regulation of protein loc	0.01946 ( 45 of 2312 genes )	0.00973 ( 331 of 34011 annotated genes )	4.914e-06	0.01726	Apbb1, Mycbp2, Traf2, Tacc3, Pcsk1, Cdk5, Gsk3b, Pam, Fzd7, Gnb2l1, Faf1, Sgk1, Agtr1a, Panx1, Bard1, Csf1r, Hsp90ab1, Flna, Hc, Anxa1, Prkci, Tnfrsf1a, Cd36, Clip3, Inpp5k, Jak2, Gapvd1, Hyal2, Dnajc1, Tgfbr1, Ubr5, Tmem30b, Rbm22, Erbb4, Rbck1, Ankrd1, Nlrp1a, Wwp2, Myo5b, Lyn, Ralgapb, Rbpms, Rsl1d1, Cyld, Fbxw11,
GO:0010033	response to organic subst	0.05796 ( 134 of 2312 genes )	0.04019 ( 1367 of 34011 annotated genes )	5.547e-06	0.01949	Pparg, Prkcb, Aff3, Eif2b4, Pygm, Dnmt3a, Atp2a2, Kcnma1, Casq2, Agtr1a, Xbp1, Adrbk1, Anxa1, Psap, Pim3, Duox1, Faf2, Slit2, Nlrc5, Hyal2, Tgfbr1, Ccl5, Lias, Fert2, Hmgn3, Smarcc1, Il12a, Cd74, Abcg1, Creb1, Traf2, Inhba, Sox5, Cdc73, Gab1, Hdac4, Cnga3, Apob, Sgk1, Ptgir, Ephx1, Vcam1, Prkci, Cuzd1, Aanat, Pla2g4f, B2m, Cd36, Ghr, Serpina3c, Srebf1, Ubxn4, Rorb, Jak2, Rae1, Akirin2, Asph, Il1r…
GO:0030031	cell projection assembly	0.01298 ( 30 of 2312 genes )	0.00544 ( 185 of 34011 annotated genes )	5.869e-06	0.02062	Ift172, Ttll1, Arhgap42, Tmem107, Ssh3, Slit2, Disc1, Ift46, Slc9a3r1, Dync2h1, Lrrc16a, Tgfbr1, Als2cr4, Ocrl, Pxn, Onecut2, Lpar1, Ccl5, Ahi1, Arl6, Fert2, Tsga14, Fnbp1l, Myo3b, Hydin, Flna, Kbtbd10, Ccdc88a, Itgb4, Wdr35,
GO:0035023	regulation of Rho protein	0.01081 ( 25 of 2312 genes )	0.00412 ( 140 of 34011 annotated genes )	6.11e-06	0.02146	Itsn1, Rasip1, Kalrn, Arap3, Gsk3b, Plekhg5, Arhgap27, Arhgap1, Plekhg6, Mcf2l, Dock7, Abr, Rgnef, Arhgef15, Arhgef12, Arhgef1, Flot1, Rap1gds1, Lpar1, Obscn, Tsc1, Arhgef7, Agrn, Chn1, Ntrk2,
GO:0001525	angiogenesis	0.01946 ( 45 of 2312 genes )	0.00982 ( 334 of 34011 annotated genes )	6.234e-06	0.0219	Ptprb, Prkcb, Dll4, Vash1, Ephb4, Rras, Krit1, Stk4, Figf, Adora2b, Tnfrsf12a, Plcg1, Pik3ca, Hc, Itgb1, Jam3, Sema4a, Bai1, Tnfrsf1a, Scg2, Ppp3r1, Gna13, Rasip1, Cd36, Fgfr1, Lect1, Slit2, Klf4, Pik3r6, Amot, Ctsh, Enpep, Lepr, Tgfbr1, Nfatc4, Dicer1, Ccl5, Rbm15, Serpinf1, Acvr1, Gtf2i, Tspan12, C6, Uts2, Rock2,
GO:0071900	regulation of protein ser	0.01773 ( 41 of 2312 genes )	0.00861 ( 293 of 34011 annotated genes )	6.248e-06	0.02195	Ercc6, Traf2, Chordc1, Gsk3b, Map2k3, Map2k2, Ilk, Stk4, Gab1, Map3k5, Ptpn6, Rptor, Spag9, Csf1r, Hsp90ab1, Rgs14, Ptprj, Map3k1, Ccnc, Maged1, Fgfr1, Ghr, Frs2, Inpp5k, Wnk1, Pik3r6, Ikbkg, Ccnl1, Hyal2, Pxn, Lpar1, Ccny, Trp73, Pde6h, 1810031K17Rik, Bmp7, Hipk3, Lyn, Mapk8ip3, Magi3, Cd74,
GO:0016567	protein ubiquitination	0.02033 ( 47 of 2312 genes )	0.01047 ( 356 of 34011 annotated genes )	6.81e-06	0.02392	Ppil2, Skp1a, Traf2, Cdk5, Rnf103, Disc1, Birc6, Cdc73, Ube2w, Chfr, G2e3, Tnks2, Cbl, Ube2a, Ube2d1, Pcgf1, Traf3, Trim2, Peli1, Bard1, Rnf130, Os9, Ube3c, Rbbp6, Asb9, Wac, Map3k1, Nedd4l, Cul1, Hectd1, Cbx8, Herc3, Atg3, Ubr1, Tgfbr1, Ubr5, Rbck1, Suz12, Rnf187, Hectd2, Wwp2, Vcpip1, Mib1, Ube2j1, Nub1, Fbxw11, Usp44,
GO:0070201	regulation of establishme	0.01730 ( 40 of 2312 genes )	0.00835 ( 284 of 34011 annotated genes )	6.876e-06	0.02416	Apbb1, Traf2, Tacc3, Pcsk1, Cdk5, Gsk3b, Pam, Fzd7, Gnb2l1, Faf1, Agtr1a, Panx1, Bard1, Csf1r, Hsp90ab1, Flna, Hc, Anxa1, Prkci, Tnfrsf1a, Cd36, Clip3, Inpp5k, Jak2, Gapvd1, Hyal2, Dnajc1, Tgfbr1, Ubr5, Tmem30b, Rbm22, Erbb4, Rbck1, Ankrd1, Wwp2, Nlrp1a, Lyn, Cyld, Rbpms, Fbxw11,
GO:0022898	regulation of transmembra	0.00649 ( 15 of 2312 genes )	0.00176 ( 60 of 34011 annotated genes )	6.877e-06	0.02416	Cacnb3, Cacna2d1, Jsrp1, Fkbp1b, Cacna1s, Ryr1, Cacna1h, Cacna2d3, Slc9a3r1, Cacna1e, Cacna1f, Catsper1, Plcg2, Ahcyl1, Casq2,
GO:0046034	ATP metabolic process	0.01125 ( 26 of 2312 genes )	0.00441 ( 150 of 34011 annotated genes )	7.052e-06	0.02477	Ino80, Atp4b, Ndufs1, Atp5j2, Kif20b, Wrn, Atp2c1, Atp7a, Ide, Top2a, Msh2, Macf1, Top1, Ola1, Abca2, Ascc3, Atp2a2, Clpx, Atp1a4, Polq, Atf7ip, Abca4, Tnnt2, Atp1b3, Ddx3x, Atp13a5,
GO:0051247	positive regulation of pr	0.02465 ( 57 of 2312 genes )	0.01364 ( 464 of 34011 annotated genes )	7.236e-06	0.02542	Atg10, Gsk3b, Inhba, Brd7, Disc1, Fam129a, Gnas, Gnb2l1, Dok7, Hes5, Hdac4, Ube2d1, Peli1, Elavl1, Csf1r, Pik3ca, Itgb1, Senp2, Asb9, Tnfrsf1a, Kndc1, Pias1, Cd36, Cul4b, Nipbl, Ghr, Reln, Klf4, Clip3, Srebf1, Rps6kb2, Dock7, Araf, Jak2, Tgfbr1, Arnt, Tollip, 5033414D02Rik, Rps4x, Erbb4, Pacsin3, Gcg, Bmp7, Itgb3, Ccl5, Agrn, Acvr1, Lyn, Rbpms, Abcf1, Il12a, Dnmt3b, Sgsm3, Fbxw11, Nub1, Cd74, C6,
GO:0040007	growth	0.03590 ( 83 of 2312 genes )	0.02232 ( 759 of 34011 annotated genes )	7.51e-06	0.02638	Apbb1, Ino80, Brca2, Pparg, Prkcb, Nrg1, Frzb, Disc1, Ninj1, Areg, Atad3a, Fzd7, Gnb2l1, Tro, 2400003C14Rik, Tnks2, Rptor, Ip6k2, Tnfrsf12a, Sbf1, Ankrd26, Plac8, Pik3ca, Stra8, Psap, Rbbp7, Dscam, Fgfr1, Dclk1, Smarca2, Nipbl, Apba2, Slit2, Hyal2, Tgfbr1, Tcfcp2l1, Pcsk1n, Gas2l1, Dhcr7, Ros1, Exosc9, Chrnd, Il7, Creb1, Wrn, Inhba, Serpine2, Stra6, Mpo, Pnpt1, Gnas, Sox10, Ilk, Sema7a, Stk4, Pgl…
GO:0032386	regulation of intracellul	0.01254 ( 29 of 2312 genes )	0.00523 ( 178 of 34011 annotated genes )	7.588e-06	0.02666	Tnfrsf1a, Tacc3, Cd36, Cdk5, Gsk3b, Fzd7, Inpp5k, Faf1, Jak2, Abca2, Hyal2, Tgfbr1, Casq2, Ubr5, Ppp1r12a, Rbm22, Tmem30b, Erbb4, Rbck1, Mapt, Fkbp1b, Tnnt2, Bard1, Ryr2, Hsp90ab1, Flna, Rbpms, Cyld, Fbxw11,
GO:0048729	tissue morphogenesis	0.02552 ( 59 of 2312 genes )	0.01438 ( 489 of 34011 annotated genes )	8.781e-06	0.03085	Ift122, Vasp, Spint1, Dll4, Inhba, Ankrd6, Tulp3, Frzb, Jag2, Areg, Tead1, Macf1, Col1a1, Ilk, Hs2st1, Stk4, Myl3, Ext2, Smad2, Krt71, Grb2, Agtr1a, Med12, Tsc1, Hey2, Mybpc3, Ift172, Ppp3r1, Col11a1, Gna13, Maged1, Fgfr1, Atp7a, Slit2, Hectd1, Frs2, Klf4, Eomes, Celsr1, Ctsh, Nfatc4, Luzp1, Dicer1, Col3a1, Ankrd1, Bmp7, Npnt, Ahi1, Lias, Tnnt2, Ryr2, Sema4c, Mib1, Pofut2, Acvr1, Rbm15, Sox11, Tp…
GO:0010740	positive regulation of in	0.01990 ( 46 of 2312 genes )	0.01026 ( 349 of 34011 annotated genes )	8.859e-06	0.03112	Terf2ip, Pdgfra, Prkcb, Nrg1, Mink1, Ilk, Sema7a, Hes5, Gab1, Bnip2, Spag9, Fgf21, Peli1, Csf1r, Flna, Itgb1, Ntrk2, Ryk, Taok1, Itsn1, Ptprj, Dixdc1, Tnfrsf1a, Cd36, Fgfr1, Tnfrsf19, Atp2c1, Plekhg5, Golt1b, Ghr, Jak2, Lepr, Tgfbr1, Zfp622, Erbb4, Lpar1, Rbck1, Itgb3, Ccl5, Gcg, Npnt, Sema4c, Ksr1, Lyn, Il12a, Cd74,
GO:0007420	brain development	0.02206 ( 51 of 2312 genes )	0.01185 ( 403 of 34011 annotated genes )	9.452e-06	0.0332	Brca2, Creb1, Tacc3, Cdk5, Gsk3b, Serpine2, Tulp3, Frzb, Disc1, Fzd7, Abr, Cntn1, Hes5, Pax6, Shroom2, Nfib, Bat3, Tbr1, Tsc1, Zfp238, Rora, Ntrk2, Ryk, Atrx, Dixdc1, Kndc1, Lhx3, Fgfr1, Dclk1, Nipbl, Atp7a, Otx1, Slit2, Reln, Frs2, Eomes, Dync2h1, Erbb4, Hook3, Trp73, Dicer1, Dscaml1, Aplp2, Gpr56, Ahi1, Sema4c, Hydin, Unc5c, Lrp2, Mapk8ip3, Gnpat,
GO:0010927	cellular component assemb	0.00995 ( 23 of 2312 genes )	0.00370 ( 126 of 34011 annotated genes )	9.729e-06	0.03418	Ift172, Ttll1, Tmem107, Pdgfra, Neb, Disc1, Dync2h1, Ilk, Als2cr4, Ocrl, Onecut2, Ahi1, Arl6, Tnnt2, Tsga14, Gpc1, Hydin, Flna, Itgb1, Mybpc3, Tpm1, Gnpat, Wdr35,
GO:0006814	sodium ion transport	0.01168 ( 27 of 2312 genes )	0.00476 ( 162 of 34011 annotated genes )	1.005e-05	0.0353	Atp4b, Slc10a2, Slc38a4, Prss8, Slc4a10, Slc13a5, Nedd4l, Slc8a3, Serpine2, Catsper4, Gnas, Slc9a3r1, Slc12a1, Slc9a3, Slc5a7, Slc4a8, Ahcyl1, Slc1a1, Atp1a4, Scn9a, Sgk1, Scn10a, Scn4a, Scn3a, Atp1b3, Slc9a5, Slc34a1,
GO:0034765	regulation of ion transme	0.01298 ( 30 of 2312 genes )	0.00559 ( 190 of 34011 annotated genes )	1.01e-05	0.03549	Trpm4, Jsrp1, Kcnu1, Cacna1s, Kcnc3, Catsper4, Cacna1h, Cacna2d3, Slc9a3r1, Catsper2, Cacna1f, Kcnma1, Ahcyl1, Casq2, Cacnb3, Scn9a, Trpv2, Cacna2d1, Scn10a, Gcg, Scn4a, Fkbp1b, Ryr1, Scn3a, Tpcn1, Cacna1e, Catsper1, Plcg2, Kcnj6, Kcnk2,
GO:0010629	negative regulation of ge	0.04282 ( 99 of 2312 genes )	0.02811 ( 956 of 34011 annotated genes )	1.062e-05	0.03732	Pparg, Ctcf, Zfp295, Nrg1, Sp3, Brd7, Dnmt3a, Zfp354a, 2410016O06Rik, Rfx5, Nfib, Atf7ip, Smarce1, Zfp12, Trps1, Fabp4, Rbfox2, Baz2a, Rbbp7, Pex14, Ubtf, Nfix, Maged1, Hr, Fgfr1, Smyd1, Smarca2, Nipbl, Slit2, Uty, Klf4, Ripply3, Inpp5k, Tdrd9, Ilf3, Tcfcp2l1, Rbm10, Tet1, Gas2l1, Trp73, Rbbp8, Per1, Setd8, Ankrd1, Hipk3, Ros1, Dnmt3b, Fbxw11, Dmrt1, Tbk1, Ikzf4, Dedd, Ncbp1, Ciita, Creb1, Tarbp2…
GO:0007169	transmembrane receptor pr	0.02076 ( 48 of 2312 genes )	0.01097 ( 373 of 34011 annotated genes )	1.093e-05	0.03841	Ift122, Cilp, Erbb3, Pdgfra, Prkcb, Nrg1, Cdk5, Atxn7, Ephb4, Areg, Fam72a, Dok7, Fam20c, Ltk, Ptprf, Figf, Gab1, Grb2, Fgf21, Csf1r, Gpc1, Flna, Rgs14, Sulf2, Ntrk2, Sgpl1, Ptprj, Afap1l2, Fgfr1, Lect1, Ghr, Frs2, Srebf1, Slc9a3r1, Inpp5k, Jak2, Emr4, Pxn, Erbb4, Efna3, Pde6h, Aplp2, Agrn, Ahi1, Fert2, Smarcc1, Chn1, Lyn,
GO:0060429	epithelium development	0.02855 ( 66 of 2312 genes )	0.01679 ( 571 of 34011 annotated genes )	1.101e-05	0.03869	Ift122, Brca2, Pard3, Pparg, Tulp3, Frzb, Areg, Fzd7, Dmd, Nfib, Agtr1a, Xbp1, Tsc1, Anxa1, Psap, Ppp3r1, Maged1, Gna13, Fgfr1, Lect1, Slit2, Hectd1, Frs2, Tgfbr1, Tcfcp2l1, Nfatc4, Luzp1, Lias, Mib1, Ros1, Scel, Vasp, Spint1, Ankrd6, Dll4, Serpine2, Stra6, Jag2, Tead1, Ilk, Hs2st1, Stk4, Pax6, Onecut2, Grb2, Smad2, Med12, Vcam1, Hey2, Ift172, Hoxb5, Jak2, Ctsh, Celsr1, Erbb4, Dicer1, Bmp7, Npnt,…
GO:0043087	regulation of GTPase acti	0.01298 ( 30 of 2312 genes )	0.00562 ( 191 of 34011 annotated genes )	1.123e-05	0.03944	Rgs9, Sgsm1, Arfgap1, Rasgrp3, Rasip1, Arap2, Arap3, Gsk3b, Arhgap27, Tbc1d20, Arhgap1, Tbck, Dock7, Gnb2l1, Amot, Adap2, Tbc1d15, Tbc1d5, Rap1gds1, Tsc1, Ralgapa1, Arhgef7, Tbc1d9, Agrn, Asap3, Chn1, Ralgapb, Rgs14, Sgsm3, Ntrk2,
GO:0007417	central nervous system de	0.02768 ( 64 of 2312 genes )	0.01614 ( 549 of 34011 annotated genes )	1.136e-05	0.03991	Brca2, Mycbp2, Creb1, Pparg, Tacc3, Cdk5, Gsk3b, Sox5, Serpine2, Tulp3, Frzb, Disc1, Eif2b4, Fzd7, Sox10, Abr, Cntn1, Hes5, Ighmbp2, Trp53bp2, Stk4, Pax6, Shroom2, Nfib, Bat3, Tbr1, Tsc1, Zfp238, Rora, Ntrk2, Ryk, Atrx, Dixdc1, Fmr1, Mycn, Kndc1, Lhx3, Fgfr1, Dclk1, Nipbl, Atp7a, Otx1, Slit2, Reln, Frs2, Eomes, Celsr1, Rgnef, Dync2h1, Erbb4, Hook3, Trp73, Dicer1, Dscaml1, Aplp2, Ahi1, Gpr56, Sema…
GO:0006338	chromatin remodeling	0.00649 ( 15 of 2312 genes )	0.00185 ( 63 of 34011 annotated genes )	1.305e-05	0.04585	Ino80, Hdac4, Smarce1, Chek1, Smyd1, Rere, Top1, Smarcc1, Hells, Rsf1, 2410016O06Rik, Baz2a, Chd1, Nasp, Rbbp7,
GO:0043086	negative regulation of ca	0.02855 ( 66 of 2312 genes )	0.01691 ( 575 of 34011 annotated genes )	1.378e-05	0.04842	Lmtk3, Pparg, Birc6, Elfn2, Gnb2l1, Cnr2, Ptpn6, Kng2, 2310033E01Rik, Sbf1, Ppp1r1a, Serpina3b, Grm3, Serpinb1c, Hbxip, Fabp4, Flna, Rgs14, Anxa1, Nosip, Cast, Atp7a, Slit2, Klf4, Inpp5k, Lepr, Hyal2, Pcsk1n, Fkbp15, Trp73, Hipk3, Serpinb12, Lyn, Serpinf1, Pcid2, Il7, Gchfr, Spint1, Chordc1, Gsk3b, Serpine2, Fam72a, Mug1, Ilk, Sytl2, Ppp1r12a, Csrnp2, Sh3rf2, Rxfp2, Spink5, Spink10, Tfpi, Serpina…
GO:0051345	positive regulation of hy	0.01903 ( 44 of 2312 genes )	0.00985 ( 335 of 34011 annotated genes )	1.499e-05	0.05266	Rgs9, Pdgfra, Arfgap1, Pparg, Rasgrp3, Gsk3b, Wrn, Arhgap27, Msh2, Gnb2l1, Rab3a, Map3k5, Pcolce2, Agtr1a, Tsc1, Arhgef7, Aldob, Rgs14, Rab6, Rps3, Gna13, Fgfr1, Arhgap1, Gnb1, Slc9a3r1, Dock7, Jak2, Ctsh, Akirin2, Tbc1d15, Clpx, Rap1gds1, Lpar1, Ralgapa1, Ahsa1, Ccl5, Npnt, Tnnt2, Aifm3, Nlrp1a, Ralgapb, Pcna, Tpm1, C6,
GO:0045944	positive regulation of tr	0.03374 ( 78 of 2312 genes )	0.02102 ( 715 of 34011 annotated genes )	1.519e-05	0.05337	Apbb1, Ino80, Pparg, Atxn7, Nfib, Tbr1, Plac8, Map3k1, Nfix, Ppp3ca, Fgfr1, Mef2d, Smarca2, Nlrc5, Klf4, Eomes, Crx, Hyal2, Arnt, Nfatc4, Myo6, Bhlha15, Trp73, Rbck1, Ankrd1, Gtf2f2, Hmgn3, Smarcc1, Ikzf2, Tcfeb, Dmrt1, Tbk1, Ciita, Creb1, Sox5, Inhba, Gsk3b, Cdc73, Top2a, Tead1, Ash2l, Mcf2l, Sox10, Hes5, Pax6, Ppp1r12a, Hdac4, Onecut2, Csrnp2, Smad2, Med12, Hey2, Rora, Osr2, Alx4, Mycn, Ablim2,…
GO:0051223	regulation of protein tra	0.01600 ( 37 of 2312 genes )	0.00773 ( 263 of 34011 annotated genes )	1.531e-05	0.05377	Apbb1, Traf2, Tacc3, Pcsk1, Cdk5, Gsk3b, Pam, Fzd7, Faf1, Agtr1a, Panx1, Bard1, Csf1r, Hsp90ab1, Flna, Hc, Anxa1, Tnfrsf1a, Cd36, Inpp5k, Jak2, Gapvd1, Hyal2, Tgfbr1, Dnajc1, Ubr5, Tmem30b, Rbm22, Erbb4, Rbck1, Ankrd1, Wwp2, Nlrp1a, Lyn, Cyld, Rbpms, Fbxw11,
GO:0016311	dephosphorylation	0.01773 ( 41 of 2312 genes )	0.00894 ( 304 of 34011 annotated genes )	1.536e-05	0.05395	Lmtk3, Ptprb, Dusp28, Elfn2, Nt5c3, Impa1, Ptprd, Mtmr14, Sytl2, Ptprf, Ppp1r12a, Ptpn6, Sacm1l, Ocrl, Hsp90b1, Csrnp2, Sbf1, Sh3rf2, Tsc1, Ptpn9, Sec16a, Mtmr11, Ptpn3, Ptprj, Ppp3r1, Ppp3ca, Ptprn, Ssh3, Inpp5k, Wnk1, Ppp1cb, Jak2, G6pc3, Fkbp15, Inpp4b, Ptpru, Npnt, Fkbp1b, Mtmr1, Ptp4a2, Fbxw11,
GO:0019953	sexual reproduction	0.02465 ( 57 of 2312 genes )	0.01400 ( 476 of 34011 annotated genes )	1.542e-05	0.05418	Brca2, Spata5, Clgn, Inhba, Catsper4, Jag2, Msh2, Cacna1h, Catsper2, Ccdc135, Camk2b, Dnmt3a, Zp1, Zp3r, Spata20, Atp1a4, Apob, Piwil4, Sbf1, Bat3, Tssk2, Usp42, Morc1, Rxfp2, Pdilt, Gopc, Itgb1, Stra8, Spin4, Catsper1, Jam3, Sgpl1, Strbp, Rad18, Nphp1, Cast, Trim36, Tdrd9, Adam18, Izumo1, Oca2, Tgfbr1, Crem, Qk, Diap2, Gmcl1, Zfp148, Zscan2, Mll2, Hsf2, Golga3, Bmpr1b, Ros1, Acvr1, Txndc8, Psme4…
GO:0008380	RNA splicing	0.01514 ( 35 of 2312 genes )	0.00714 ( 243 of 34011 annotated genes )	1.543e-05	0.05421	Hnrnph1, Ncbp1, Ppie, Cdc5l, Srrm1, Aqr, Snrpb2, Celf2, Son, Wdr83, Cwc22, Snrpa, Xab2, Akap17b, Clk3, Txnl4b, Snrnp27, Rbfox2, Sf3b4, Ythdc1, Bat1a, Zranb2, Mbnl1, Dhx8, Cdc40, Srsf2ip, Rbm28, Khdrbs3, Rbm22, Srrm2, Qk, Lsm1, Prpf4b, Tra2b, Hnrnpa3,
GO:0045785	positive regulation of ce	0.00952 ( 22 of 2312 genes )	0.00356 ( 121 of 34011 annotated genes )	1.606e-05	0.05643	Ptprj, Fbln2, Cd36, Abi3bp, Nrg1, Gsk3b, Disc1, Plekha2, Jak2, Ilk, Ift74, Sdc4, Tsc1, Bmp7, Itgb3, Ccl5, Npnt, Edil3, Il12a, Ccdc80, Itgb1, Hsd17b12,
GO:0032956	regulation of actin cytos	0.01125 ( 26 of 2312 genes )	0.00465 ( 158 of 34011 annotated genes )	1.832e-05	0.06437	Dixdc1, Map3k1, Neb, Ssh3, Kirrel, Pam, Jmy, Slit2, Arpc3, Inpp5k, Celsr1, Capza2, Ilk, Evl, Shroom2, Sdc4, Grb2, Tsc1, Eln, Arpc2, Fert2, Csf1r, Spna2, Jam3, Tpm1, Ccdc88a,
GO:0032270	positive regulation of ce	0.02292 ( 53 of 2312 genes )	0.01279 ( 435 of 34011 annotated genes )	1.872e-05	0.06575	Atg10, Gsk3b, Inhba, Brd7, Disc1, Fam129a, Gnas, Gnb2l1, Dok7, Hes5, Hdac4, Ube2d1, Peli1, Elavl1, Csf1r, Pik3ca, Itgb1, Senp2, Tnfrsf1a, Kndc1, Pias1, Cd36, Nipbl, Ghr, Reln, Clip3, Srebf1, Rps6kb2, Dock7, Araf, Jak2, Tgfbr1, Arnt, Tollip, 5033414D02Rik, Rps4x, Erbb4, Pacsin3, Gcg, Bmp7, Itgb3, Ccl5, Agrn, Acvr1, Lyn, Rbpms, Il12a, Dnmt3b, Abcf1, Fbxw11, Nub1, Cd74, C6,
GO:0030003	cellular cation homeostas	0.01903 ( 44 of 2312 genes )	0.00994 ( 338 of 34011 annotated genes )	1.872e-05	0.06577	Slc39a14, Pdgfra, Prkcb, Disc1, Pygm, Ryr3, Mchr1, Atp2a2, Kcnma1, Casq2, Slc39a4, Aco1, Atp1a4, Sgk1, Agtr1a, Bank1, Scara5, Hc, Itgb1, Gna13, Slc8a3, Atp2c1, Atp7a, Sv2a, Gnb1, Jak2, Slc39a13, Cacna1f, Asph, Lpar1, Fth1, Aplp2, Itgb3, Ccl5, Abcb7, Fkbp1b, Cdh23, Ryr1, Ryr2, Bsnd, Lyn, Gtf2i, Plcg2, Uts2,
GO:0040029	regulation of gene expres	0.01038 ( 24 of 2312 genes )	0.00412 ( 140 of 34011 annotated genes )	1.89e-05	0.06639	Ubtf, Apobec1, Ctcf, Tarbp2, Gsk3b, Gnas, Uty, Cbx8, Tdrd9, Dnmt3a, Tet1, Mll5, Dicer1, Airn, Piwil4, Atf7ip, Chek1, Phf8, Mll1, Pik3ca, Hells, Mll2, Dnmt3b, Baz2a,
GO:0007266	Rho protein signal transd	0.01211 ( 28 of 2312 genes )	0.00520 ( 177 of 34011 annotated genes )	1.895e-05	0.06657	Itsn1, Gna13, Rasip1, Kalrn, Arap3, Gsk3b, Plekhg5, Arhgap27, Arhgap1, Plekhg6, Mcf2l, Dock7, Abr, Celsr1, Rgnef, Arhgef15, Arhgef12, Arhgef1, Flot1, Rap1gds1, Lpar1, Obscn, Tsc1, Arhgef7, Agrn, Chn1, Ntrk2, Rock2,
GO:0051240	positive regulation of mu	0.02552 ( 59 of 2312 genes )	0.01479 ( 503 of 34011 annotated genes )	2.046e-05	0.07187	Creb1, Traf2, Nrg1, Inhba, Serpine2, Gria4, Camk2b, Cd276, Fam20c, Sema7a, Sytl2, Figf, Adora2b, Agtr1a, Panx1, Peli1, Hey2, Csf1r, Rgs14, Hc, Sulf2, Osr2, Ntrk2, Tnfrsf1a, Maged1, Cd36, Afap1l2, Fgfr1, Lect1, Nipbl, Ghr, Reln, Jak2, Fbn2, Akirin2, Arnt, Erbb4, Dicer1, Ccl5, Itgb3, Bmp7, Cartpt, Il17a, Htr7, Npnt, Ryr2, Nlrp1a, Alb, Acvr1, Bmpr1b, Ltbp3, Sox11, Il12a, Tac4, Tpm1, Cd74, Lama2, Tbk…
GO:0009611	response to wounding	0.02898 ( 67 of 2312 genes )	0.01746 ( 594 of 34011 annotated genes )	2.086e-05	0.07327	Pard3, Pdgfra, Pparg, Nrg1, Map2k3, Ninj1, Fzd7, Otog, Cnr2, Scn9a, Adora2b, Agtr1a, Fabp4, Hc, Anxa1, Nmnat1, Map3k1, Gna13, Afap1l2, Slit2, Nefl, Cd163, Hyal2, Evl, Fhad1, Trp73, Itgb3, Ccl5, Lias, Lyn, Serpinf1, Myh2, Chst2, Col5a1, Dst, Cdk5, Serpine2, Abr, Col1a1, Macf1, Cd276, Sema7a, Rab27a, Cr1l, Csf1r, Jam3, Itgb4, Tfpi, Ptprj, Il27, Proz, Tnfrsf1a, Cd36, Itga2b, Hps5, Jak2, Celsr1, Rtn4…
GO:0051169	nuclear transport	0.01687 ( 39 of 2312 genes )	0.00847 ( 288 of 34011 annotated genes )	2.228e-05	0.07828	Ncbp1, Tacc3, Cdk5, Gsk3b, Wrn, Rpain, Fzd7, Faf1, Nup214, Ppp1r12a, Nop58, Ankrd54, Tsc1, Bard1, Hsp90ab1, Flna, Rgs14, Tnfrsf1a, Ppp3r1, Nup160, Bat1a, Ppp3ca, Cd36, Sdccag1, Kpna4, Rps28, Nxf1, Jak2, Hyal2, Tgfbr1, Ahcyl1, Ubr5, Rbm22, Erbb4, Rbck1, Nup107, Rbpms, Cyld, Fbxw11,
GO:0034330	cell junction organizatio	0.00865 ( 20 of 2312 genes )	0.00315 ( 107 of 34011 annotated genes )	2.529e-05	0.08885	Ptprj, Ocln, Tns1, Pard3, Dst, Col17a1, Macf1, Fbf1, Mpp7, Shroom2, Pxn, Sdc4, Tsc1, Plekha7, Itgb3, Csf1r, Itgb1, Prkci, Itgb4, Gnpat,
GO:0031023	microtubule organizing ce	0.00606 ( 14 of 2312 genes )	0.00173 ( 59 of 34011 annotated genes )	2.623e-05	0.09216	Cep68, Ppp1r12a, Son, Brca2, Haus2, Chordc1, Chek1, Sac3d1, Ccdc52, Cntrob, Haus6, Sgol1, Clasp1, Rock2,
GO:0006397	mRNA processing	0.01773 ( 41 of 2312 genes )	0.00914 ( 311 of 34011 annotated genes )	2.636e-05	0.09261	Hnrnph1, Ncbp1, Cpsf3, Ppie, Cdc73, Cdc5l, Pnpt1, Srrm1, Aqr, Snrpb2, Celf2, Son, Wdr83, Cwc22, Snrpa, Xab2, Akap17b, Txnl4b, Snrnp27, Rbfox2, Sf3b4, Ythdc1, Wdr33, Bat1a, Apobec1, Zranb2, Mbnl1, Dhx8, Cdc40, Srsf2ip, Ahcyl1, Rbm28, Khdrbs3, Rbm22, Srrm2, Qk, Lsm1, Prpf4b, Cstf2, Tra2b, Hnrnpa3,
GO:0030198	extracellular matrix orga	0.01081 ( 25 of 2312 genes )	0.00447 ( 152 of 34011 annotated genes )	2.653e-05	0.09321	Apbb1, Col5a3, Muc5ac, Col11a1, Pdgfra, Spint1, Col5a1, Abi3bp, Atp7a, Pxdn, Col1a1, Ilk, Itga8, Tgfbr1, Postn, Apbb2, Col3a1, Aplp2, Col11a2, Eln, Npnt, Mpv17, Ccdc80, Sulf2, Hsd17b12,
GO:0048610	cellular process involved	0.01644 ( 38 of 2312 genes )	0.00823 ( 280 of 34011 annotated genes )	2.684e-05	0.09428	Brca2, Pdgfra, Tarbp2, Clgn, Inhba, Msh2, Cacna1h, Camk2b, Dnmt3a, Rsf1, Zp3r, Piwil4, Tssk2, Adrbk1, Rxfp2, Gopc, Itgb1, Stra8, Catsper1, Strbp, Sgpl1, Jam3, Psap, Map3k1, Nphp1, Cast, Inpp5k, Trim36, Tdrd9, Izumo1, Tgfbr1, Oca2, Qk, Ccl5, Mll2, Serpinf1, Acvr1, Dmrt1,
GO:0050769	positive regulation of ne	0.01038 ( 24 of 2312 genes )	0.00420 ( 143 of 34011 annotated genes )	2.712e-05	0.09529	Dixdc1, Pparg, Dscam, Serpine2, Disc1, Nefl, Sox10, 2400003C14Rik, Ilk, Sema7a, Ptprd, Ptprf, Pax6, Trp73, Sgk1, Trpv2, Tnfrsf12a, Mapt, Lyn, Rgs14, Serpinf1, Prkci, Sox11, Ntrk2,
GO:0051235	maintenance of location	0.01168 ( 27 of 2312 genes )	0.00503 ( 171 of 34011 annotated genes )	2.739e-05	0.09621	Brca2, Arhgap21, Pparg, Tacc3, Ciz1, Faf1, Fbn2, Casq2, Hook3, Fth1, Taf8, Fkbp1b, Ryr1, Ryr2, Os9, Alb, Sun2, Grinl1a, Flna, Lyn, Syne2, Sgol1, Pex14, Clasp1, Plcg2, Tln2, Morc3,
GO:0010817	regulation of hormone lev	0.01860 ( 43 of 2312 genes )	0.00979 ( 333 of 34011 annotated genes )	2.815e-05	0.09888	Dio2, Pclo, Creb1, Pdgfra, Slc18a2, Pcsk1, Inhba, Ide, Cacna1h, Slc22a1, Kcnma1, Chst8, Smad2, Dhrs9, Corin, Hsd11b2, Hsd3b6, Anxa1, Sgpl1, Pim3, Pfkfb2, Doc2b, Aanat, Ppp3ca, Reln, Srebf1, Jak2, Cplx1, Arnt, Pcsk1n, Cartpt, Gcg, Fkbp1b, Hmgn3, Furin, Cacna1e, Lyn, Bmpr1b, Sox11, Lrp2, Uts2, Kcnj6, Myrip,
GO:0034622	cellular macromolecular c	0.02292 ( 53 of 2312 genes )	0.01300 ( 442 of 34011 annotated genes )	2.903e-05	0.102	Ift122, Cenpt, Creb1, Traf2, Tubb4, Tarbp2, Nrg1, Cdk5, Arpc3, Dok7, Celf2, Capza2, Rsf1, Sgk1, Tubb6, Smad2, Grb2, Atf7ip, Mapt, Rpl24, Ahctf1, Patl1, Hey2, Aldob, Hells, Flna, Mybpc3, Map3k1, Bat1a, Ap2b1, Pias1, Kirrel, Jmy, Mbnl1, Smarca2, Slit2, Clip3, Nefl, Srsf2ip, Evl, Fhad1, Lsm14a, Rap1gds1, Dicer1, Eln, Arpc2, Ccl5, Agrn, Diap2, Fert2, Spna2, Tpm1, Pogz,
GO:0042327	positive regulation of ph	0.01644 ( 38 of 2312 genes )	0.00829 ( 282 of 34011 annotated genes )	3.146e-05	0.1105	Mobkl1a, Gsk3b, Inhba, Fam129a, Gnas, Areg, Fzd7, Gnb2l1, Dok7, Ilk, Hes5, Csf1r, Pik3ca, Itgb1, Senp2, Itsn1, Tnfrsf1a, Kndc1, Dscam, Cd36, Ghr, Reln, Clip3, Dock7, Araf, Jak2, Tgfbr1, Erbb4, Itgb3, Bmp7, Ccl5, Gcg, Agrn, Lyn, Acvr1, Il12a, Rbpms, Cd74,
GO:0018210	peptidyl-threonine modifi	0.00606 ( 14 of 2312 genes )	0.00176 ( 60 of 34011 annotated genes )	3.212e-05	0.1129	Galnt2, Prkcb, Chek1, Cdk5, Gsk3b, Gcg, Bmp7, Hipk3, Adrbk1, Sbk1, Inpp5k, Myo3b, Acvr1, Tgfbr1,
GO:0019226	transmission of nerve imp	0.02682 ( 62 of 2312 genes )	0.01602 ( 545 of 34011 annotated genes )	3.232e-05	0.1136	Pclo, Slc18a2, Nrg1, Cdk5, Gsk3b, Dpp6, Serpine2, Mpdz, Gria4, Disc1, Kcnc3, Eif2b4, Mink1, Cldn5, Sh3gl2, Rab3a, Camk2b, Ilk, Cnr2, Hes5, Arhgef15, Kcnma1, Ptprf, Dmd, Scn9a, Xbp1, Tsc1, Grm3, Gpc1, Rgs14, Ntrk2, Jam3, Doc2b, Lgi4, Pcdhb16, Ppp3ca, Ap2b1, Apba2, Hnmt, Reln, Sv2a, Celsr1, Cplx1, Slc5a7, Nfatc4, Stx4a, Slc18a1, Pnoc, Myo6, Erbb4, Dicer1, Qk, Cartpt, Agrn, Htr7, Fkbp1b, Scn3a, Cacn…
GO:0035637	multicellular organismal	0.02682 ( 62 of 2312 genes )	0.01602 ( 545 of 34011 annotated genes )	3.232e-05	0.1136	Pclo, Slc18a2, Nrg1, Cdk5, Gsk3b, Dpp6, Serpine2, Mpdz, Gria4, Disc1, Kcnc3, Eif2b4, Mink1, Cldn5, Sh3gl2, Rab3a, Camk2b, Ilk, Cnr2, Hes5, Arhgef15, Kcnma1, Ptprf, Dmd, Scn9a, Xbp1, Tsc1, Grm3, Gpc1, Rgs14, Ntrk2, Jam3, Doc2b, Lgi4, Pcdhb16, Ppp3ca, Ap2b1, Apba2, Hnmt, Reln, Sv2a, Celsr1, Cplx1, Slc5a7, Nfatc4, Stx4a, Slc18a1, Pnoc, Myo6, Erbb4, Dicer1, Qk, Cartpt, Agrn, Htr7, Fkbp1b, Scn3a, Cacn…
GO:0010608	posttranscriptional regul	0.01860 ( 43 of 2312 genes )	0.00985 ( 335 of 34011 annotated genes )	3.25e-05	0.1142	Apbb1, Eif4e3, Pcid2, Ncbp1, Creb1, Tarbp2, Pum1, Cdc73, Fam129a, Eif2b4, Ift46, Gnb2l1, Eif4e, Cpeb2, Aco1, Piwil4, Bat3, Tsc1, Patl1, Elavl1, Flna, Usp7, Morc3, Fmr1, Apobec1, Mknk2, Igf2bp1, Eif4g2, Dhx9, Cpeb3, Rps6kb2, Ctsh, Dnajc1, Rbm10, Rps4x, Lsm14a, Dicer1, Qk, Apbb2, Carhsp1, Abcf1, Fbxw11, Ccdc88c,
GO:0071702	organic substance transpo	0.02465 ( 57 of 2312 genes )	0.01438 ( 489 of 34011 annotated genes )	3.344e-05	0.1175	Osbpl9, Erbb3, Gm6614, Pparg, Slc18a2, Prkcb, Nrg1, Inhba, Slc6a5, Atp9a, Slc22a1, Abca2, Soat1, Sfxn5, Apob, Adora2b, Slco2a1, Xbp1, Slc27a5, Abca4, Fgf21, Slc22a6, Adrbk1, Hc, Anxa1, Osbpl3, Prkci, Osbpl1a, Slc10a2, Slc38a4, Slc45a1, Pla2g4f, Slc2a6, Slc13a5, Cd36, Slc2a4, Clip3, Slc15a1, Vamp7, Slc9a3r1, Inpp5k, Slc5a7, Aqp2, Slc22a21, Slc6a14, Slc1a1, G6pc3, Slc18a1, Erbb4, Cartpt, Slc2a3, It…
GO:0048568	embryonic organ developme	0.01903 ( 44 of 2312 genes )	0.01020 ( 347 of 34011 annotated genes )	3.564e-05	0.1252	Pdgfra, Spint1, Sp3, Tulp3, Frzb, Stra6, Birc6, Gnas, Tead1, Abr, Sobp, Stk4, Gab1, Pax6, Gjb6, Smad2, Grb2, Vcam1, Hey2, Ush1c, T2, Osr2, Alx4, Mycn, Col11a1, Fgfr1, Nipbl, Otx1, Frs2, Hoxb5, Eomes, Celsr1, Hoxa3, Itga8, Tgfbr1, Arnt, Myo6, Dscaml1, Tmie, Bmp7, Cdh23, Mll1, Sox11, Tcfeb,
GO:0046488	phosphatidylinositol meta	0.00822 ( 19 of 2312 genes )	0.00297 ( 101 of 34011 annotated genes )	3.639e-05	0.1278	Cdipt, Pi4k2a, Pip4k2c, Pikfyve, Pigc, Inpp5k, Pigx, Pik3c2g, Impa1, Sacm1l, Smg1, Ocrl, Ip6k2, Inpp4b, Pigk, Pign, Csf1r, Pik3ca, Plcg2,
GO:0070887	cellular response to chem	0.04585 ( 106 of 2312 genes )	0.03152 ( 1072 of 34011 annotated genes )	3.669e-05	0.1289	Pdgfra, Pparg, Trpm4, Prkcb, Ube2w, Pxdn, Elmo2, Dnmt3a, Ltk, Ptprf, Casq2, Map3k5, Ptpn6, Rptor, Mll5, Hsp90b1, Agtr1a, Xbp1, Plcg1, Mpv17, Fabp4, Hc, Anxa1, Stra8, Psap, Pim3, Duox1, Scg2, Mknk2, Naip2, Ppp3ca, Cd68, Atp7a, Slit2, Nlrc5, Klf4, Inpp5k, Lepr, Ubr1, Hyal2, Tgfbr1, Aqp2, Arnt, Nfatc4, Pxn, Cxcr6, Ankrd1, Akr1c13, Ccl5, Fert2, Hmgn3, Ryr1, Scn3a, Pde4b, Smarcc1, Lifr, Lyn, Dnmt3b, C…
GO:0006913	nucleocytoplasmic transpo	0.01644 ( 38 of 2312 genes )	0.00835 ( 284 of 34011 annotated genes )	3.68e-05	0.1293	Ncbp1, Tacc3, Cdk5, Gsk3b, Rpain, Fzd7, Faf1, Nup214, Ppp1r12a, Nop58, Ankrd54, Tsc1, Bard1, Hsp90ab1, Rgs14, Flna, Tnfrsf1a, Ppp3r1, Nup160, Bat1a, Ppp3ca, Cd36, Sdccag1, Kpna4, Rps28, Nxf1, Jak2, Hyal2, Tgfbr1, Ahcyl1, Ubr5, Rbm22, Erbb4, Rbck1, Nup107, Rbpms, Cyld, Fbxw11,
GO:0007276	gamete generation	0.02163 ( 50 of 2312 genes )	0.01217 ( 414 of 34011 annotated genes )	3.994e-05	0.1403	Brca2, Spata5, Clgn, Inhba, Catsper4, Jag2, Msh2, Catsper2, Ccdc135, Dnmt3a, Spata20, Atp1a4, Apob, Piwil4, Sbf1, Bat3, Tssk2, Morc1, Usp42, Rxfp2, Pdilt, Gopc, Itgb1, Stra8, Spin4, Catsper1, Sgpl1, Strbp, Jam3, Rad18, Nphp1, Tdrd9, Adam18, Oca2, Crem, Tgfbr1, Qk, Diap2, Gmcl1, Zfp148, Zscan2, Hsf2, Mll2, Golga3, Bmpr1b, Ros1, Acvr1, Txndc8, Psme4, Dmrt1,
GO:0043405	regulation of MAP kinase	0.01298 ( 30 of 2312 genes )	0.00600 ( 204 of 34011 annotated genes )	4.076e-05	0.1432	Ptprj, Ercc6, Map3k1, Maged1, Traf2, Gsk3b, Fgfr1, Map2k3, Ghr, Frs2, Map2k2, Pik3r6, Inpp5k, Ilk, Hyal2, Gab1, Ptpn6, Map3k5, Pxn, Trp73, Lpar1, Pde6h, Hipk3, Bmp7, Spag9, Rgs14, Lyn, Mapk8ip3, Cd74, Magi3,
GO:0008285	negative regulation of ce	0.02336 ( 54 of 2312 genes )	0.01350 ( 459 of 34011 annotated genes )	4.137e-05	0.1453	Brca2, Pparg, Inhba, Vash1, Serpine2, Brd7, Frzb, Cdc73, Krit1, Pbrm1, Cd276, Ilk, Ptprf, Stk4, Ptpn6, Pax6, Gjb6, Nfib, Hdac4, Adora2b, Ptgir, Smad2, Tsc1, Brip1, Peli1, Rxfp2, Itgb1, Morc3, Ptprj, Ing5, Maged1, Smarca2, Lect1, Slit2, Klf4, Fktn, Slc9a3r1, Ctla4, Jak2, Muc2, Tgfbr1, Rbm10, Asph, Erbb4, Dicer1, Fth1, Bmp7, Ptpru, Mll1, Lyn, Serpinf1, Il12a, Sox11, Ppp2r5c,
GO:0010769	regulation of cell morpho	0.01168 ( 27 of 2312 genes )	0.00515 ( 175 of 34011 annotated genes )	4.155e-05	0.146	Dixdc1, Kndc1, Dscam, Ssh3, Cdk5, Gsk3b, Slit2, Disc1, Reln, Nefl, Col1a1, Camk2b, Ilk, 2400003C14Rik, Sema7a, Ptprd, Ptprf, Mark2, Sgk1, Trpv2, Smad2, Tnfrsf12a, Mapt, Chn1, Pofut2, Ryk, Ntrk2,
GO:0006457	protein folding	0.01038 ( 24 of 2312 genes )	0.00432 ( 147 of 34011 annotated genes )	4.307e-05	0.1513	Ppil2, Dnaja2, B2m, Ppie, Dnajc24, Clgn, Chordc1, H2-DMa, Fkbp5, Hscb, Cct4, Dnajc27, Tcp1, Dnajc8, Unc45a, Dnajc1, Clpx, Fkbp15, Hsp90b1, Fkbp1b, Dnajb12, Hsp90ab1, St13, Cd74,
GO:0006479	protein methylation	0.00779 ( 18 of 2312 genes )	0.00276 ( 94 of 34011 annotated genes )	4.523e-05	0.1589	Ctcf, Ash2l, Ilf3, Whsc1, Dot1l, Etf1, Prmt1, Pcmt1, Mll5, Suv420h1, Setd8, Suz12, Mll1, Mll2, Dnmt3b, Baz2a, Mll3, Rab6,
GO:0008213	protein alkylation	0.00779 ( 18 of 2312 genes )	0.00276 ( 94 of 34011 annotated genes )	4.523e-05	0.1589	Ctcf, Ash2l, Ilf3, Whsc1, Dot1l, Etf1, Prmt1, Pcmt1, Mll5, Suv420h1, Setd8, Suz12, Mll1, Mll2, Dnmt3b, Baz2a, Mll3, Rab6,
GO:0007051	spindle organization	0.00606 ( 14 of 2312 genes )	0.00185 ( 63 of 34011 annotated genes )	5.73e-05	0.2013	Ino80, Haus2, Dicer1, Tacc3, Mybl2, Sac3d1, Kif2a, Ccdc52, Espl1, Cltc, Dctn2, Haus6, Rgs14, Flna,
GO:0008361	regulation of cell size	0.01903 ( 44 of 2312 genes )	0.01041 ( 354 of 34011 annotated genes )	5.746e-05	0.2019	Apbb1, Ino80, Il7, Creb1, Pparg, Nrg1, Inhba, Serpine2, Frzb, Disc1, Atad3a, Gnb2l1, Tro, 2400003C14Rik, Ilk, Sema7a, Rptor, Ip6k2, Sgk1, Trpv2, Tnfrsf12a, Sbf1, Mapt, Tsc1, Igfbp7, Hsp90ab1, Ryk, Rbbp7, Ptprj, Dscam, Smarca2, Dclk1, Slit2, Htra3, Emp1, Hyal2, Tgfbr1, Gas2l1, Bin3, Trp73, Apbb2, Mll2, Ros1, Exosc9,
GO:0031401	positive regulation of pr	0.01903 ( 44 of 2312 genes )	0.01041 ( 354 of 34011 annotated genes )	5.746e-05	0.2019	Atg10, Gsk3b, Inhba, Brd7, Disc1, Fam129a, Gnas, Gnb2l1, Dok7, Hes5, Hdac4, Ube2d1, Peli1, Csf1r, Pik3ca, Itgb1, Senp2, Tnfrsf1a, Kndc1, Pias1, Cd36, Nipbl, Ghr, Reln, Clip3, Srebf1, Dock7, Araf, Jak2, Tgfbr1, Arnt, Tollip, Erbb4, Bmp7, Itgb3, Ccl5, Gcg, Agrn, Lyn, Acvr1, Rbpms, Il12a, Dnmt3b, Cd74,
GO:0048585	negative regulation of re	0.03028 ( 70 of 2312 genes )	0.01908 ( 649 of 34011 annotated genes )	5.795e-05	0.2036	Rgs9, Erbb3, Pparg, Prkcb, Slc9a3r2, Atxn7, Tulp3, Frzb, Camk2b, Cnr2, Ptprf, Ptpn6, Tsc1, Gtf2h2, Adrbk1, Gpc1, Adamtsl2, Rgs14, Hc, Anxa1, Sulf2, Dkk2, Rps3, Rgs4, Arap3, Lect1, Slit2, Nlrc5, Klf4, Fktn, Ctla4, Inpp5k, Fbn2, Ubr1, Hyal2, Gcg, Ccl5, Htr7, Serpinf1, Lyn, Cd74, Cilp, Tarbp2, Ankrd6, Gsk3b, Serpine2, Fam72a, Abr, Sox10, Scyl2, Cd276, Rps6ka6, Stk4, Mill2, Onecut2, Med12, Hey2, Cr1l…
GO:0048562	embryonic organ morphogen	0.01384 ( 32 of 2312 genes )	0.00670 ( 228 of 34011 annotated genes )	5.831e-05	0.2049	Pdgfra, Sp3, Tulp3, Frzb, Stra6, Gnas, Abr, Sobp, Pax6, Gjb6, Smad2, Ush1c, T2, Osr2, Alx4, Mycn, Col11a1, Fgfr1, Nipbl, Otx1, Frs2, Hoxb5, Celsr1, Itga8, Hoxa3, Tgfbr1, Myo6, Dscaml1, Bmp7, Tmie, Cdh23, Sox11,
GO:0010562	positive regulation of ph	0.01644 ( 38 of 2312 genes )	0.00856 ( 291 of 34011 annotated genes )	6.265e-05	0.2201	Mobkl1a, Gsk3b, Inhba, Fam129a, Gnas, Areg, Fzd7, Gnb2l1, Dok7, Ilk, Hes5, Csf1r, Pik3ca, Itgb1, Senp2, Itsn1, Tnfrsf1a, Kndc1, Dscam, Cd36, Ghr, Reln, Clip3, Dock7, Araf, Jak2, Tgfbr1, Erbb4, Itgb3, Bmp7, Ccl5, Gcg, Agrn, Lyn, Acvr1, Il12a, Rbpms, Cd74,
GO:0045937	positive regulation of ph	0.01644 ( 38 of 2312 genes )	0.00856 ( 291 of 34011 annotated genes )	6.265e-05	0.2201	Mobkl1a, Gsk3b, Inhba, Fam129a, Gnas, Areg, Fzd7, Gnb2l1, Dok7, Ilk, Hes5, Csf1r, Pik3ca, Itgb1, Senp2, Itsn1, Tnfrsf1a, Kndc1, Dscam, Cd36, Ghr, Reln, Clip3, Dock7, Araf, Jak2, Tgfbr1, Erbb4, Itgb3, Bmp7, Ccl5, Gcg, Agrn, Lyn, Acvr1, Il12a, Rbpms, Cd74,
GO:0043583	ear development	0.01211 ( 28 of 2312 genes )	0.00556 ( 189 of 34011 annotated genes )	6.339e-05	0.2227	Col11a1, H2-DMa, Fgfr1, H2-K1, Otx1, Frzb, Nipbl, Stra6, Abr, Celsr1, Sobp, Itga8, Cux1, Hes5, Kcnma1, Gjb6, Myo6, Shroom2, Dicer1, Tmie, Ahi1, Cdh23, Ush1c, Hey2, Igfbp7, Mpv17, Osr2, Mcoln3,
GO:0051924	regulation of calcium ion	0.00952 ( 22 of 2312 genes )	0.00388 ( 132 of 34011 annotated genes )	6.416e-05	0.2254	Jsrp1, Cacna1s, Cacna1h, Cacna2d3, Inpp5k, Cacna1f, Mchr1, Aqp2, Casq2, Asph, Cacnb3, Trpv2, Cacna2d1, Gcg, Ccl5, Fkbp1b, Ryr1, Ryr2, Cacna1e, Lyn, Catsper1, Plcg2,
GO:0006935	chemotaxis	0.01860 ( 43 of 2312 genes )	0.01014 ( 345 of 34011 annotated genes )	6.5e-05	0.2283	Apbb1, Unc5b, Mycbp2, Vasp, Pdgfra, Trpm4, Cdk5, Boc, Elmo2, Pik3c2g, Figf, Pax6, Alcam, Nfib, Tbr1, Rpl24, Hc, Ryk, Jam3, Efnb1, Etv1, Ptprj, Scg2, Dscam, Lhx3, Slit2, Reln, Amot, Evl, 5033414D02Rik, Lpar1, Flot1, Apbb2, Bmp7, Ccl5, Fert2, Pde4b, Chn1, Lyn, Bmpr1b, Mapk8ip3, Lama2, Cd74,
GO:0042177	negative regulation of pr	0.00433 ( 10 of 2312 genes )	0.00103 ( 35 of 34011 annotated genes )	6.851e-05	0.2407	Wac, Dedd, Bat3, Nrg1, Serpine2, Furin, Grin2c, Flna, Ptpn3, Usp44,
GO:0042461	photoreceptor cell develo	0.00433 ( 10 of 2312 genes )	0.00103 ( 35 of 34011 annotated genes )	6.851e-05	0.2407	Pax6, Rp1l1, Cnga3, Gnat2, Arl3, Rorb, Prkci, Ntrk2, Tulp1, Olfm3,
GO:0006260	DNA replication	0.01384 ( 32 of 2312 genes )	0.00676 ( 230 of 34011 annotated genes )	6.911e-05	0.2428	Ino80, Brca2, Lin9, Pdgfra, Wrn, Rpain, Areg, Top2a, Top1, Mcm6, Orc3, Ciz1, Dna2, Nasp, Dbf4, Papd5, Nfib, Clspn, Polq, Pds5a, Polb, Stra8, Gins1, Rbbp7, Ccdc88a, Ing5, Nfix, Stag2, Nfkbil2, Chtf18, Orc6, Pcna,
GO:0042330	taxis	0.01860 ( 43 of 2312 genes )	0.01017 ( 346 of 34011 annotated genes )	6.951e-05	0.2442	Apbb1, Unc5b, Mycbp2, Vasp, Pdgfra, Trpm4, Cdk5, Boc, Elmo2, Pik3c2g, Figf, Pax6, Alcam, Nfib, Tbr1, Rpl24, Hc, Ryk, Jam3, Efnb1, Etv1, Ptprj, Scg2, Dscam, Lhx3, Slit2, Reln, Amot, Evl, 5033414D02Rik, Lpar1, Flot1, Apbb2, Bmp7, Ccl5, Fert2, Pde4b, Chn1, Lyn, Bmpr1b, Mapk8ip3, Lama2, Cd74,
GO:0009791	post-embryonic developmen	0.00822 ( 19 of 2312 genes )	0.00312 ( 106 of 34011 annotated genes )	7.246e-05	0.2546	Slc18a2, Dscam, Gnas, Klf4, Tapt1, Rab3a, Tgfbr1, Aco1, Dicer1, Scn9a, Trp73, Apob, Smad2, Cdh23, Dhcr7, Mapk8ip3, Sgpl1, Morc3, Alx4,
GO:0018105	peptidyl-serine phosphory	0.00908 ( 21 of 2312 genes )	0.00365 ( 124 of 34011 annotated genes )	7.342e-05	0.2579	Map3k1, Cdk5, Gsk3b, Sbk1, Inpp5k, Dock7, Araf, Camk2b, Ilk, Tgfbr1, Stk4, Smg1, Clspn, Sgk1, Hipk3, Gcg, Adrbk1, Brsk2, Pik3ca, Myo3b, Morc3,
GO:0042491	auditory receptor cell di	0.00389 ( 9 of 2312 genes )	0.00085 ( 29 of 34011 annotated genes )	7.739e-05	0.2719	Myo6, Fgfr1, Cdh23, Ush1c, Hey2, Cux1, Kcnma1, Hes5, Mcoln3,
GO:0018107	peptidyl-threonine phosph	0.00562 ( 13 of 2312 genes )	0.00168 ( 57 of 34011 annotated genes )	7.862e-05	0.2762	Prkcb, Chek1, Cdk5, Gsk3b, Gcg, Bmp7, Hipk3, Adrbk1, Sbk1, Inpp5k, Myo3b, Acvr1, Tgfbr1,
GO:0006605	protein targeting	0.01817 ( 42 of 2312 genes )	0.00991 ( 337 of 34011 annotated genes )	7.864e-05	0.2763	Pard3, Tacc3, Cdk5, Gsk3b, Rpain, Fzd7, Macf1, Faf1, Pex26, Scarb2, Nup214, Nop58, Rab27a, Bard1, Gnptg, Os9, Hsp90ab1, Flna, Ppp1r3c, Ank1, Pex14, Rab6, Tnfrsf1a, Ppp3r1, Ppp3ca, Cd36, Kpna4, Nbea, Tomm40, Inpp5k, Jak2, Hyal2, Tgfbr1, Ahcyl1, Ubr5, Myo6, Rbm22, Erbb4, Rbck1, Cyld, Rbpms, Fbxw11,
GO:0032318	regulation of Ras GTPase	0.01038 ( 24 of 2312 genes )	0.00450 ( 153 of 34011 annotated genes )	8.29e-05	0.2912	Sgsm1, Arfgap1, Rasgrp3, Rasip1, Arap2, Arap3, Gsk3b, Arhgap27, Tbc1d20, Arhgap1, Tbck, Dock7, Adap2, Tbc1d15, Tbc1d5, Rap1gds1, Tsc1, Tbc1d9, Agrn, Asap3, Chn1, Ralgapb, Sgsm3, Ntrk2,
GO:0007059	chromosome segregation	0.00952 ( 22 of 2312 genes )	0.00397 ( 135 of 34011 annotated genes )	9.058e-05	0.3182	Ino80, Brca2, Smc5, Cenpt, Ctcf, Ccdc52, Nipbl, Top2a, Top1, Smc4, Stag2, Slc25a5, Ska1, Rad21, Espl1, Smc2, Incenp, Rgs14, Stra8, Sgol1, Pogz, Usp9x,
GO:0007015	actin filament organizati	0.01211 ( 28 of 2312 genes )	0.00567 ( 193 of 34011 annotated genes )	9.202e-05	0.3233	Map3k1, Vasp, Ssh3, Kirrel, Jmy, Cald1, Slit2, Ezr, Arpc3, Inpp5k, Capza2, Aqp2, Evl, Shroom2, Sdc4, Hsp90b1, Grb2, Tsc1, Eln, Arpc2, Diap2, Fert2, Tnnt2, Ush1c, Flna, Prkci, Spna2, Tpm1,
GO:0016358	dendrite development	0.00908 ( 21 of 2312 genes )	0.00370 ( 126 of 34011 annotated genes )	9.313e-05	0.3272	Kndc1, Dscam, Kalrn, Cdk5, Gsk3b, Dclk1, Atp7a, Disc1, Reln, Mink1, Cacna1f, Camk2b, Ilk, Ptprd, Ptprf, Tulp1, Mcf2, Myo6, Lpar1, Sgk1, Ntrk2,
GO:0048592	eye morphogenesis	0.00908 ( 21 of 2312 genes )	0.00370 ( 126 of 34011 annotated genes )	9.313e-05	0.3272	Megf11, Ift122, Col5a1, Dscam, Sp3, Nipbl, Stra6, Frs2, Rorb, Tulp1, Pax6, Shroom2, Cnga3, Gnat2, Bmp7, Ahi1, Prkci, Sox11, Ntrk2, Olfm3, Tspan12,
GO:0001501	skeletal system developme	0.01817 ( 42 of 2312 genes )	0.01000 ( 340 of 34011 annotated genes )	9.605e-05	0.3374	Pdgfra, Sox5, Sp3, Tulp3, Frzb, Jag2, Gnas, Col1a1, Fam20c, Hes5, Nfib, Hdac4, Smad2, Sulf2, Osr2, Ryk, Sgpl1, Alx4, Mycn, Col11a1, Mef2d, Fgfr1, Lect1, Nipbl, Atp7a, Col9a1, Cacna1s, Hoxb5, Tapt1, Hoxa3, Whsc1, Fbn2, Tgfbr1, Aes, Dscaml1, Col11a2, Bmp7, Ryr1, Fbxw4, Bmpr1b, Sox11, Ltbp3,
GO:0007050	cell cycle arrest	0.01341 ( 31 of 2312 genes )	0.00659 ( 224 of 34011 annotated genes )	9.828e-05	0.3453	Apbb1, Pcid2, Wac, Csnk2a2, Inhba, Vash1, Dst, Jmy, Pnpt1, Top2a, Msh2, Chfr, Macf1, Ilk, Clspn, Gas2l1, Mll5, Trp73, Rbbp8, Apbb2, Chek1, Kntc1, 5430437P03Rik, Rpl24, Clock, Stra8, Il12a, Sgsm3, Usp44, Ppp2r5c, Taok1,
GO:0010720	positive regulation of ce	0.01125 ( 26 of 2312 genes )	0.00512 ( 174 of 34011 annotated genes )	9.849e-05	0.346	Dixdc1, Pparg, Dscam, Serpine2, Disc1, Nefl, Col1a1, Sox10, 2400003C14Rik, Ilk, Sema7a, Ptprd, Ptprf, Pax6, Trp73, Sgk1, Trpv2, Smad2, Tnfrsf12a, Mapt, Lyn, Rgs14, Serpinf1, Prkci, Sox11, Ntrk2,
GO:0045786	negative regulation of ce	0.01600 ( 37 of 2312 genes )	0.00844 ( 287 of 34011 annotated genes )	0.0001015	0.3567	Apbb1, Pcid2, Csnk2a2, Cdk5, Inhba, Vash1, Dst, Cdc73, Pnpt1, Top2a, Msh2, Chfr, Macf1, Ilk, Clspn, Mll5, Mov10l1, 5430437P03Rik, Rpl24, Stra8, Ptpn3, Taok1, Wac, Fam5c, Jmy, Gas2l1, Rbbp8, Trp73, Apbb2, Chek1, Kntc1, Bmp7, Clock, Sgsm3, Il12a, Usp44, Ppp2r5c,
GO:0002252	immune effector process	0.01903 ( 44 of 2312 genes )	0.01067 ( 363 of 34011 annotated genes )	0.0001032	0.3626	Pi4k2a, Gm885, Traf2, Tarbp2, Trpm4, Mpo, Msh2, Abr, Sema7a, Exosc3, Ptpn6, Mill2, Pglyrp3, Mll5, Adora2b, Lgals8, Rab27a, Traf3, Cr1l, Hc, Sema4a, Il27, Oas3, Apobec1, B2m, Cd36, H2-K1, H2-DMa, Atp7a, Vamp7, Eomes, Ctsh, Hyal2, Exosc5, Dicer1, Ccl5, Fert2, Tyrobp, Lyn, Il12a, Tac4, Plcg2, C6, Cd74,
GO:0006875	cellular metal ion homeos	0.01644 ( 38 of 2312 genes )	0.00876 ( 298 of 34011 annotated genes )	0.000104	0.3654	Pdgfra, Prkcb, Disc1, Pygm, Ryr3, Mchr1, Atp2a2, Kcnma1, Casq2, Aco1, Sgk1, Agtr1a, Bank1, Scara5, Hc, Itgb1, Gna13, Slc8a3, Atp2c1, Sv2a, Gnb1, Jak2, Cacna1f, Asph, Lpar1, Fth1, Itgb3, Ccl5, Abcb7, Fkbp1b, Cdh23, Ryr1, Ryr2, Bsnd, Lyn, Gtf2i, Plcg2, Uts2,
GO:0034504	protein localization to n	0.01341 ( 31 of 2312 genes )	0.00662 ( 225 of 34011 annotated genes )	0.0001068	0.3752	Tnfrsf1a, Ppp3r1, Ppp3ca, Tacc3, Cd36, Gsk3b, Pikfyve, Kpna4, Rpain, Fzd7, Col1a1, Faf1, Jak2, Hyal2, Tgfbr1, Nup214, Ubr5, Rbm22, Erbb4, Nop58, Taf8, Rbck1, Bmp7, Sun2, Hsp90ab1, Flna, Rbpms, Cyld, Syne2, Fbxw11, Morc3,
GO:0006281	DNA repair	0.01730 ( 40 of 2312 genes )	0.00941 ( 320 of 34011 annotated genes )	0.0001076	0.3781	Terf2ip, Apbb1, Ino80, Brca2, Smc5, Ercc6, Wrn, Ube2w, Rpain, Msh2, Dna2, Ascc3, Pms2, Clspn, Polq, Rad21, Ube2a, 5430437P03Rik, Gtf2h2, Brip1, Polb, Bard1, Xab2, Usp7, Atrx, Taok1, Rps3, Rad18, Jmy, Cul4b, Rad51ap1, Rad51l3, Smc4, Nfkbil2, Smg1, Rbbp8, Chek1, Smc2, Pcna, 2310035K24Rik,
GO:0051329	interphase of mitotic cel	0.01168 ( 27 of 2312 genes )	0.00544 ( 185 of 34011 annotated genes )	0.0001099	0.3859	Apbb1, Ino80, Brca2, Ppp3ca, Inhba, Cul4b, Brd7, Cdc73, Top2a, Camk2b, Eif4e, Anp32b, Ptpn6, Dbf4, Rbbp8, Ccny, Trp73, Apbb2, Usp37, Chek1, Phf8, Rpl24, Ush1c, Acvr1, Itgb1, Tfdp1, Ppp2r5c,
GO:0001954	positive regulation of ce	0.00346 ( 8 of 2312 genes )	0.00071 ( 24 of 34011 annotated genes )	0.0001103	0.3875	Ptprj, Sdc4, Cd36, Gsk3b, Tsc1, Disc1, Plekha2, Ilk,
GO:0032504	multicellular organism re	0.02552 ( 59 of 2312 genes )	0.01570 ( 534 of 34011 annotated genes )	0.0001114	0.3915	Brca2, Creb1, Pdgfra, Spata5, Clgn, Inhba, Sp3, Serpine2, Catsper4, Jag2, Eif2b4, Msh2, Catsper2, Ccdc135, Dnmt3a, Spata20, Atp1a4, Apob, Piwil4, Sbf1, Bat3, Ube2a, Tssk2, Adrbk1, Usp42, Morc1, Rxfp2, Pdilt, Gopc, Itgb1, Stra8, Spin4, Catsper1, Jam3, Sgpl1, Strbp, Rad18, Nphp1, Tdrd9, Adam18, Oca2, Tgfbr1, Crem, Erbb4, Qk, Diap2, Gmcl1, Aprt, Zfp148, Zscan2, Hsf2, Mll2, Golga3, Bmpr1b, Ros1, Acvr…
GO:0048609	multicellular organismal	0.02552 ( 59 of 2312 genes )	0.01570 ( 534 of 34011 annotated genes )	0.0001114	0.3915	Brca2, Creb1, Pdgfra, Spata5, Clgn, Inhba, Sp3, Serpine2, Catsper4, Jag2, Eif2b4, Msh2, Catsper2, Ccdc135, Dnmt3a, Spata20, Atp1a4, Apob, Piwil4, Sbf1, Bat3, Ube2a, Tssk2, Adrbk1, Usp42, Morc1, Rxfp2, Pdilt, Gopc, Itgb1, Stra8, Spin4, Catsper1, Jam3, Sgpl1, Strbp, Rad18, Nphp1, Tdrd9, Adam18, Oca2, Tgfbr1, Crem, Erbb4, Qk, Diap2, Gmcl1, Aprt, Zfp148, Zscan2, Hsf2, Mll2, Golga3, Bmpr1b, Ros1, Acvr…
GO:0018209	peptidyl-serine modificat	0.00952 ( 22 of 2312 genes )	0.00403 ( 137 of 34011 annotated genes )	0.0001132	0.3976	Map3k1, Galnt2, Cdk5, Gsk3b, Sbk1, Inpp5k, Dock7, Araf, Camk2b, Ilk, Tgfbr1, Stk4, Smg1, Clspn, Sgk1, Hipk3, Gcg, Adrbk1, Brsk2, Pik3ca, Myo3b, Morc3,
GO:0071902	positive regulation of pr	0.01168 ( 27 of 2312 genes )	0.00547 ( 186 of 34011 annotated genes )	0.0001204	0.4231	Ercc6, Map3k1, Maged1, Traf2, Fgfr1, Map2k3, Ghr, Frs2, Map2k2, Pik3r6, Ikbkg, Ilk, Stk4, Gab1, Map3k5, Pxn, Rptor, Trp73, Ccny, Lpar1, Pde6h, Spag9, Csf1r, Hsp90ab1, Mapk8ip3, Magi3, Cd74,
GO:0006403	RNA localization	0.00692 ( 16 of 2312 genes )	0.00247 ( 84 of 34011 annotated genes )	0.0001254	0.4407	Fmr1, Ncbp1, Bat1a, Nup160, Igf2bp1, Nxf1, Rps28, Lrpprc, Nup214, Nup93, Nup107, Qk, Tsc1, Ahctf1, Hnrnpa3, Senp2,
GO:0001654	eye development	0.01600 ( 37 of 2312 genes )	0.00853 ( 290 of 34011 annotated genes )	0.0001259	0.4422	Megf11, Ift122, Pdgfra, Col5a1, Inhba, Sp3, Tulp3, Stra6, Hes5, Pax6, Shroom2, Cnga3, Gnat2, Rpl24, Osr2, Prkci, Ntrk2, Dixdc1, Map3k1, Nphp1, Dscam, Nipbl, Cacna1s, Klf4, Frs2, Gnb1, Rorb, Cacna1f, Crx, Tgfbr1, Tulp1, Bmp7, Ahi1, Bmpr1b, Sox11, Tspan12, Olfm3,
GO:0050795	regulation of behavior	0.00908 ( 21 of 2312 genes )	0.00379 ( 129 of 34011 annotated genes )	0.0001315	0.462	Ptprj, Scg2, Pdgfra, Dscam, Stra6, Slit2, Reln, Mchr1, Figf, Lpar1, Ccl5, Ahi1, Htr7, Ankrd26, Alb, Lyn, Hc, Jam3, Ryk, Uts2, Cd74,
GO:0051640	organelle localization	0.00908 ( 21 of 2312 genes )	0.00379 ( 129 of 34011 annotated genes )	0.0001315	0.462	Brca2, Arhgap21, Pard3, Pclo, Tacc3, Cdc42bpa, Ccdc52, Ciz1, Dmd, Shroom2, Bhlha15, Hook3, Rab27a, Mapt, Kif5b, Alb, Sun2, Fnbp1l, Grinl1a, Syne2, Myrip,
GO:0006346	methylation-dependent chr	0.00216 ( 5 of 2312 genes )	0.00026 ( 9 of 34011 annotated genes )	0.0001337	0.4698	Tet1, Apobec1, Hells, Dnmt3a, Dnmt3b,
GO:0008154	actin polymerization or d	0.00779 ( 18 of 2312 genes )	0.00300 ( 102 of 34011 annotated genes )	0.0001365	0.4797	Map3k1, Vasp, Ssh3, Kirrel, Jmy, Slit2, Arpc3, Capza2, Aqp2, Evl, Shroom2, Grb2, Arpc2, Eln, Fert2, Diap2, Tpm1, Spna2,
GO:0042384	cilium assembly	0.00606 ( 14 of 2312 genes )	0.00200 ( 68 of 34011 annotated genes )	0.0001379	0.4843	Ift172, Ttll1, Ocrl, Tmem107, Onecut2, Arl6, Disc1, Ahi1, Tsga14, Dync2h1, Hydin, Flna, Als2cr4, Wdr35,
GO:0035295	tube development	0.02163 ( 50 of 2312 genes )	0.01279 ( 435 of 34011 annotated genes )	0.0001389	0.488	Ift122, Vasp, Pdgfra, Dll4, Sp3, Tulp3, Stra6, Areg, Tead1, Rab3a, Ilk, Cux1, Hs2st1, Stk4, Nfib, Smad2, Agtr1a, Bat3, Med12, Tsc1, Ift172, Mycn, Ppp3r1, Gna13, Maged1, Rasip1, Fgfr1, Atp7a, Slit2, Hectd1, Ctsh, Celsr1, Luzp1, Nfatc4, Pxn, Dicer1, Bmp7, Npnt, Ahi1, Lias, Ryr2, Dhcr7, Sema4c, Mib1, Acvr1, Rbm15, Ltbp3, Sox11, Mapk8ip3, Rock2,
GO:0055065	metal ion homeostasis	0.01687 ( 39 of 2312 genes )	0.00920 ( 313 of 34011 annotated genes )	0.0001394	0.4896	Pdgfra, Prkcb, Disc1, Gnas, Pygm, Ryr3, Mchr1, Atp2a2, Kcnma1, Casq2, Aco1, Sgk1, Agtr1a, Bank1, Scara5, Hc, Itgb1, Gna13, Slc8a3, Atp2c1, Sv2a, Gnb1, Jak2, Cacna1f, Asph, Lpar1, Fth1, Itgb3, Ccl5, Abcb7, Fkbp1b, Cdh23, Ryr1, Ryr2, Bsnd, Lyn, Gtf2i, Plcg2, Uts2,
GO:0006417	regulation of translation	0.01081 ( 25 of 2312 genes )	0.00494 ( 168 of 34011 annotated genes )	0.0001419	0.4984	Eif4e3, Fmr1, Ncbp1, Mknk2, Tarbp2, Igf2bp1, Eif4g2, Pum1, Cpeb3, Fam129a, Eif2b4, Rps6kb2, Gnb2l1, Eif4e, Dnajc1, Cpeb2, Rps4x, Aco1, Lsm14a, Qk, Piwil4, Tsc1, Patl1, Elavl1, Abcf1,
GO:0045778	positive regulation of os	0.00433 ( 10 of 2312 genes )	0.00112 ( 38 of 34011 annotated genes )	0.0001467	0.5153	Bmp7, Nipbl, Lect1, Acvr1, Bmpr1b, Cd276, Fam20c, Sox11, Osr2, Fbn2,
GO:0051093	negative regulation of de	0.02509 ( 58 of 2312 genes )	0.01552 ( 528 of 34011 annotated genes )	0.000148	0.5198	Apbb1, Pparg, Gsk3b, Inhba, Vash1, Frzb, Cdc73, Areg, Fzd7, Krit1, Hes5, 2410016O06Rik, Rps6ka6, Arhgef15, Pax6, Pglyrp3, Hdac4, Hmgb3, Med12, Itgb1, Ryk, Sema4a, Bai1, Dixdc1, Mycn, Irx3, Nbr1, Cd36, Fgfr1, Lect1, Nipbl, Klf4, Ctla4, Amot, Eomes, Tgfbr1, Stag2, Prmt1, Tet1, Hook3, Gas2l1, Trp73, Dicer1, Suz12, Bmp7, Cartpt, Itgb3, Clec2g, Mib1, Lyn, Rbm15, Serpinf1, Gtf2i, Ltbp3, Sox11, Cd74, Ab…
GO:0044255	cellular lipid metabolic	0.03028 ( 70 of 2312 genes )	0.01973 ( 671 of 34011 annotated genes )	0.0001591	0.5588	Pparg, Pam, Acoxl, St6galnac6, Oc90, Pigx, Sacm1l, Ip6k2, Slc27a5, Ankrd26, Plcg1, Plcb3, Pik3ca, Fabp4, Anxa1, Psap, Cdipt, Pikfyve, Inpp5k, Elovl5, Pdss1, Akr1b7, Smg1, Inpp4b, Lias, Pigk, Gnpat, Cd74, Abcg1, Pla2g4d, Pi4k2a, Pip4k2c, Pigc, Ptpla, Ept1, Pik3c2g, Impa1, Soat1, Naga, Lypla1, Ocrl, Bdh2, Apob, Far2, Dhrs9, Acot12, Csf1r, Hmgcs1, Aasdh, Sgpl1, Ptgr2, Faah, Tnfrsf1a, Dhrs4, Pla2g4f,…
GO:0071843	cellular component biogen	0.01298 ( 30 of 2312 genes )	0.00647 ( 220 of 34011 annotated genes )	0.0001646	0.5781	Bat1a, Rpf1, Tarbp2, Tfb2m, Mbnl1, Serpine2, Rpl5, Clip3, Rps28, Rrn3, Celf2, Isg20, Exosc3, Srsf2ip, Exosc5, 2410016O06Rik, Rplp0, Lsm14a, Nop58, Dicer1, Tsc1, Rpl24, Rcl1, Patl1, Gnl2, Exosc8, Utp14a, Nol9, Utp6, Exosc9,
GO:0032781	positive regulation of AT	0.00260 ( 6 of 2312 genes )	0.00041 ( 14 of 34011 annotated genes )	0.0001673	0.5876	Tnnt2, Aldob, Rab3a, Ahsa1, Tpm1, Rab6,
GO:0042953	lipoprotein transport	0.00260 ( 6 of 2312 genes )	0.00041 ( 14 of 34011 annotated genes )	0.0001673	0.5876	Apobec1, Apob, Pparg, Cd36, Lrp2, Unc119b,
GO:0007283	spermatogenesis	0.01687 ( 39 of 2312 genes )	0.00929 ( 316 of 34011 annotated genes )	0.0001702	0.5981	Brca2, Spata5, Clgn, Catsper4, Jag2, Catsper2, Ccdc135, Dnmt3a, Spata20, Atp1a4, Apob, Piwil4, Sbf1, Bat3, Tssk2, Morc1, Usp42, Pdilt, Gopc, Stra8, Catsper1, Sgpl1, Strbp, Jam3, Rad18, Nphp1, Tdrd9, Adam18, Crem, Oca2, Qk, Gmcl1, Hsf2, Zscan2, Golga3, Ros1, Txndc8, Psme4, Dmrt1,
GO:0048232	male gamete generation	0.01687 ( 39 of 2312 genes )	0.00929 ( 316 of 34011 annotated genes )	0.0001702	0.5981	Brca2, Spata5, Clgn, Catsper4, Jag2, Catsper2, Ccdc135, Dnmt3a, Spata20, Atp1a4, Apob, Piwil4, Sbf1, Bat3, Tssk2, Morc1, Usp42, Pdilt, Gopc, Stra8, Catsper1, Sgpl1, Strbp, Jam3, Rad18, Nphp1, Tdrd9, Adam18, Crem, Oca2, Qk, Gmcl1, Hsf2, Zscan2, Golga3, Ros1, Txndc8, Psme4, Dmrt1,
GO:0032011	ARF protein signal transd	0.00389 ( 9 of 2312 genes )	0.00094 ( 32 of 34011 annotated genes )	0.0001805	0.6342	Cyth1, Arfgap1, Psd, Arap2, Arap3, D10Bwg1379e, Psd3, Asap3, Adap2,
GO:0032012	regulation of ARF protein	0.00389 ( 9 of 2312 genes )	0.00094 ( 32 of 34011 annotated genes )	0.0001805	0.6342	Cyth1, Arfgap1, Psd, Arap2, Arap3, D10Bwg1379e, Psd3, Asap3, Adap2,
GO:0051925	regulation of calcium ion	0.00389 ( 9 of 2312 genes )	0.00094 ( 32 of 34011 annotated genes )	0.0001805	0.6342	Cacnb3, Cacna2d1, Cacna1s, Ryr1, Cacna2d3, Cacna1h, Cacna1e, Cacna1f, Catsper1,
GO:0002682	regulation of immune syst	0.03028 ( 70 of 2312 genes )	0.01982 ( 674 of 34011 annotated genes )	0.0001814	0.6371	Pparg, Trpm4, Prkcb, Cnr2, Ptpn6, Mll5, Adora2b, Lgals8, Ankrd54, Plcg1, Rbfox2, Hc, Anxa1, Efnb1, Msn, H2-DMa, H2-K1, Slit2, Nlrc5, Ctla4, H2-Q1, Prmt1, Gas2l1, Cacnb3, Rbck1, Ccl5, Itgb3, Fert2, Lyn, Il12a, Cd74, Tbk1, Pcid2, Gm885, Il7, Traf2, Tarbp2, Inhba, Cdc73, Gnas, Abr, Cd276, Sema7a, Figf, Mill2, Pglyrp3, Hmgb3, Vcam1, Traf3, Peli1, Cr1l, Csf1r, Rora, Jam3, Il27, Vtcn1, Ptprj, B2m, Cd36…
GO:0003012	muscle system process	0.01211 ( 28 of 2312 genes )	0.00591 ( 201 of 34011 annotated genes )	0.0001861	0.6538	Ppp3ca, Jsrp1, Map2k3, Cald1, Cacna1s, Klf4, Ryr3, Atp2a2, Kcnma1, Casq2, Myl3, Hdac4, Adora2b, Rap1gds1, Scn10a, Htr7, Fkbp1b, Npnt, Tnnt3, Adrbk1, Ryr1, Tnnt2, Hey2, Ryr2, Sulf2, Mybpc3, Tpm1, Myh2,
GO:0016571	histone methylation	0.00606 ( 14 of 2312 genes )	0.00206 ( 70 of 34011 annotated genes )	0.0001907	0.6698	Mll5, Suv420h1, Ctcf, Suz12, Setd8, Ash2l, Mll1, Mll2, Whsc1, Dnmt3b, Dot1l, Mll3, Baz2a, Prmt1,
GO:0051297	centrosome organization	0.00519 ( 12 of 2312 genes )	0.00159 ( 54 of 34011 annotated genes )	0.0001911	0.6713	Cep68, Ppp1r12a, Brca2, Haus2, Chordc1, Chek1, Sac3d1, Ccdc52, Cntrob, Haus6, Sgol1, Rock2,
GO:0021987	cerebral cortex developme	0.00562 ( 13 of 2312 genes )	0.00182 ( 62 of 34011 annotated genes )	0.0001951	0.6853	Dixdc1, Pax6, Dicer1, Tacc3, Cdk5, Gsk3b, Fgfr1, Tsc1, Slit2, Disc1, Zfp238, Reln, Ntrk2,
GO:0071310	cellular response to orga	0.03374 ( 78 of 2312 genes )	0.02273 ( 773 of 34011 annotated genes )	0.0002006	0.7047	Pdgfra, Pparg, Prkcb, Ube2w, Dnmt3a, Ptprf, Casq2, Ptpn6, Rptor, Hsp90b1, Agtr1a, Xbp1, Plcg1, Anxa1, Psap, Pim3, Duox1, Naip2, Ppp3ca, Cd68, Slit2, Nlrc5, Klf4, Inpp5k, Lepr, Ubr1, Hyal2, Tgfbr1, Pxn, Cxcr6, Ankrd1, Ccl5, Fert2, Hmgn3, Ryr1, Smarcc1, Lifr, Dnmt3b, Cd74, Traf2, Creb1, Tarbp2, Sox5, Inhba, Pnpt1, Col1a1, Gab1, Sgk1, Grb2, Jak1, Vcam1, Traf3, Csf1r, Rora, Prkci, Cuzd1, Col6a1, Tnfr…
GO:0040008	regulation of growth	0.02422 ( 56 of 2312 genes )	0.01502 ( 511 of 34011 annotated genes )	0.0002024	0.711	Apbb1, Ino80, Il7, Creb1, Pparg, Prkcb, Nrg1, Inhba, Wrn, Serpine2, Frzb, Disc1, Mpo, Pnpt1, Gnb2l1, Tro, 2400003C14Rik, Ilk, Tnks2, Sema7a, Stk4, Ip6k2, Sgk1, Trpv2, Tnfrsf12a, Sbf1, Mapt, Hey2, Ankrd26, Igfbp7, Pik3ca, Plac8, Stra8, Rbbp7, Ryk, Sgpl1, Ptprj, Ing5, Dscam, Cd36, Fgfr1, Smarca2, Nipbl, Slit2, Ghr, Htra3, Hyal2, Tgfbr1, Tcfcp2l1, Pcsk1n, Aes, Erbb4, Gas2l1, Apbb2, Agrn, Exosc9,
GO:0060548	negative regulation of ce	0.02941 ( 68 of 2312 genes )	0.01920 ( 653 of 34011 annotated genes )	0.0002061	0.7241	Erbb3, Nrg1, Birc6, Atad3a, Msh2, Krit1, Ptgfr, Apip, Tmem132a, Hsp90b1, Agtr1a, Polb, Hbxip, Plac8, Pik3ca, Hsp90ab1, Anxa1, Pim3, Itsn1, Scg2, Fgfr1, Atp7a, Nefl, Rrn3, Araf, Tgfbr1, Trp73, Gcg, Ccl5, Itgb3, Hipk3, Lifr, Alb, Cd74, Pcid2, Il7, Faim, Traf2, Gsk3b, Sox10, G2e3, Ilk, Son, Sgk1, Cbl, Gclm, Bard1, Hey2, Rxfp2, Hells, Prkci, Qars, Ntrk2, Ptprj, Lhx3, Ctsh, Erbb4, Dicer1, Fth1, Apbb2,…
GO:0006936	muscle contraction	0.01081 ( 25 of 2312 genes )	0.00506 ( 172 of 34011 annotated genes )	0.0002066	0.7259	Jsrp1, Map2k3, Cald1, Cacna1s, Ryr3, Atp2a2, Kcnma1, Casq2, Myl3, Hdac4, Rap1gds1, Adora2b, Scn10a, Htr7, Fkbp1b, Npnt, Tnnt3, Adrbk1, Ryr1, Tnnt2, Ryr2, Sulf2, Mybpc3, Tpm1, Myh2,
GO:0016049	cell growth	0.01730 ( 40 of 2312 genes )	0.00970 ( 330 of 34011 annotated genes )	0.0002075	0.7289	Apbb1, Ino80, Il7, Pparg, Nrg1, Inhba, Serpine2, Frzb, Disc1, Atad3a, Gnb2l1, Tro, 2400003C14Rik, Ilk, Sema7a, Rptor, Ip6k2, Sgk1, Trpv2, Tnfrsf12a, Sbf1, Mapt, Igfbp7, Ryk, Rbbp7, Ptprj, Dscam, Smarca2, Dclk1, Slit2, Htra3, Emp1, Hyal2, Tgfbr1, Gas2l1, Bin3, Apbb2, Mll2, Ros1, Exosc9,
GO:0032507	maintenance of protein lo	0.00649 ( 15 of 2312 genes )	0.00232 ( 79 of 34011 annotated genes )	0.0002094	0.7355	Brca2, Hook3, Tacc3, Taf8, Os9, Faf1, Sun2, Flna, Fbn2, Syne2, Sgol1, Pex14, Clasp1, Tln2, Morc3,
GO:0050657	nucleic acid transport	0.00649 ( 15 of 2312 genes )	0.00232 ( 79 of 34011 annotated genes )	0.0002094	0.7355	Fmr1, Nup93, Ncbp1, Bat1a, Nup160, Qk, Nup107, Tsc1, Ahctf1, Nxf1, Rps28, Hnrnpa3, Lrpprc, Senp2, Nup214,
GO:0050658	RNA transport	0.00649 ( 15 of 2312 genes )	0.00232 ( 79 of 34011 annotated genes )	0.0002094	0.7355	Fmr1, Nup93, Ncbp1, Bat1a, Nup160, Qk, Nup107, Tsc1, Ahctf1, Nxf1, Rps28, Hnrnpa3, Lrpprc, Senp2, Nup214,
GO:0051236	establishment of RNA loca	0.00649 ( 15 of 2312 genes )	0.00232 ( 79 of 34011 annotated genes )	0.0002094	0.7355	Fmr1, Nup93, Ncbp1, Bat1a, Nup160, Qk, Nup107, Tsc1, Ahctf1, Nxf1, Rps28, Hnrnpa3, Lrpprc, Senp2, Nup214,
GO:0050772	positive regulation of ax	0.00476 ( 11 of 2312 genes )	0.00138 ( 47 of 34011 annotated genes )	0.0002157	0.7579	Dixdc1, Trpv2, Tnfrsf12a, Dscam, Mapt, Disc1, Nefl, Ilk, 2400003C14Rik, Sema7a, Ntrk2,
GO:0061097	regulation of protein tyr	0.00476 ( 11 of 2312 genes )	0.00138 ( 47 of 34011 annotated genes )	0.0002157	0.7579	Erbb3, Nrg1, Afap1l2, Aplp2, Ccl5, Reln, Fam72a, Csf1r, Dok7, Gnb2l1, Hyal2,
GO:0043623	cellular protein complex	0.01600 ( 37 of 2312 genes )	0.00876 ( 298 of 34011 annotated genes )	0.0002185	0.7675	Ift122, Cenpt, Traf2, Tubb4, Nrg1, Cdk5, Arpc3, Dok7, Capza2, Sgk1, Tubb6, Smad2, Grb2, Mapt, Ahctf1, Aldob, Flna, Mybpc3, Map3k1, Ap2b1, Jmy, Kirrel, Slit2, Clip3, Nefl, Evl, Fhad1, Rap1gds1, Arpc2, Ccl5, Eln, Agrn, Diap2, Fert2, Tpm1, Spna2, Pogz,
GO:0048706	embryonic skeletal system	0.00822 ( 19 of 2312 genes )	0.00338 ( 115 of 34011 annotated genes )	0.0002211	0.7768	Mycn, Col11a1, Pdgfra, Sp3, Tulp3, Nipbl, Gnas, Col1a1, Hoxb5, Tapt1, Hoxa3, Tgfbr1, Smad2, Dscaml1, Bmp7, Osr2, Sox11, Sulf2, Alx4,
GO:0010976	positive regulation of ne	0.00606 ( 14 of 2312 genes )	0.00209 ( 71 of 34011 annotated genes )	0.000223	0.7835	Fgfr1, Serpine2, Ankrd1, Htr7, Disc1, Reln, Lyn, Camk2b, Itgb1, Ltk, Prkci, Cntn1, Ntrk2, Mark2,
GO:0022604	regulation of cell morpho	0.01168 ( 27 of 2312 genes )	0.00567 ( 193 of 34011 annotated genes )	0.0002238	0.7864	Dixdc1, Kndc1, Dscam, Ssh3, Cdk5, Gsk3b, Slit2, Disc1, Reln, Nefl, Col1a1, Camk2b, Ilk, 2400003C14Rik, Sema7a, Ptprd, Ptprf, Mark2, Sgk1, Trpv2, Smad2, Tnfrsf12a, Mapt, Chn1, Pofut2, Ryk, Ntrk2,
GO:0006955	immune response	0.02941 ( 68 of 2312 genes )	0.01926 ( 655 of 34011 annotated genes )	0.0002249	0.7901	Pparg, Trpm4, Prkcb, Msh2, Isg20, Map3k5, Ptpn6, Adora2b, Lgals8, Klrg1, Plcg1, Hc, Mx1, Sema4a, H2-DMa, H2-K1, Atp7a, Nlrc5, Ctla4, Eomes, H2-Q1, Nlrx1, Cacnb3, Rbck1, Ccl5, Fert2, Csf3, Lyn, Il12a, Tcfeb, Tac4, Cd74, Tbk1, Gm885, Il7, Ciita, Pi4k2a, Traf2, Abr, Cd276, Exosc3, Sema7a, Mill2, Pglyrp3, Rab27a, Traf3, Peli1, Cr1l, Csf1r, Jam3, Il27, Ltb, Ptprj, Oas3, B2m, Oasl1, Polr3h, Cd36, Vamp7…
GO:0007163	establishment or maintena	0.00735 ( 17 of 2312 genes )	0.00285 ( 97 of 34011 annotated genes )	0.0002257	0.7929	Cyth1, Pard3, Gsk3b, Dst, Ezr, Brsk2, Macf1, Dock7, Fbf1, Amot, Krit1, Fermt1, Ilk, Syne2, Prkci, Jam3, Mark2,
GO:0044057	regulation of system proc	0.02249 ( 52 of 2312 genes )	0.01373 ( 467 of 34011 annotated genes )	0.0002278	0.8002	Cdk5, Gsk3b, Inhba, Serpine2, Cald1, Gria4, Kcnc3, Rab3a, Camk2b, Cnr2, Atp2a2, Hes5, Kcnma1, Casq2, Myl3, Hdac4, Adora2b, Grm3, Adrbk1, Hey2, Rgs14, Ntrk2, Mybpc3, Ppp3ca, Fgfr1, Reln, Klf4, Srebf1, Slc9a3r1, Wnk1, Celsr1, Jak2, Nfatc4, Slc18a1, Myo6, Erbb4, Dicer1, Scn10a, Cartpt, Htr7, Npnt, Fkbp1b, Tnnt3, Ryr1, Tnnt2, Ryr2, Cacna1e, Tac4, Tpm1, Ctss, Uts2, Lama2,
GO:0001775	cell activation	0.02725 ( 63 of 2312 genes )	0.01755 ( 597 of 34011 annotated genes )	0.0002417	0.8492	Pcid2, Pi4k2a, Slamf1, Il7, Gm885, Pdgfra, Prkcb, Sp3, Serpine2, Jag2, Mink1, Fzd7, Msh2, Abr, Camk2b, Cd276, Exosc3, Cnr2, Ptpn6, Mill2, Ncaph2, Pglyrp3, Mll5, Adora2b, Hmgb3, Lgals8, Rab27a, Vcam1, Bank1, Peli1, Hells, Rora, Anxa1, Sema4a, Il27, Efnb1, Ptprj, Vtcn1, Gna13, Cast, B2m, H2-DMa, Atp7a, Vamp7, Itga2b, Ctla4, Eomes, Jak2, Hyal2, Evl, Fhad1, Ccl5, Itgb3, Il17a, Fkbp1b, Fert2, Tyrobp, …
GO:0034329	cell junction assembly	0.00649 ( 15 of 2312 genes )	0.00235 ( 80 of 34011 annotated genes )	0.0002419	0.8499	Ptprj, Pxn, Sdc4, Tns1, Pard3, Dst, Tsc1, Col17a1, Itgb3, Macf1, Fbf1, Mpp7, Itgb1, Itgb4, Gnpat,
GO:0051325	interphase	0.01168 ( 27 of 2312 genes )	0.00570 ( 194 of 34011 annotated genes )	0.0002437	0.8563	Apbb1, Ino80, Brca2, Ppp3ca, Inhba, Cul4b, Brd7, Cdc73, Top2a, Camk2b, Eif4e, Anp32b, Ptpn6, Dbf4, Rbbp8, Ccny, Trp73, Apbb2, Usp37, Chek1, Phf8, Rpl24, Ush1c, Acvr1, Itgb1, Tfdp1, Ppp2r5c,
GO:0030832	regulation of actin filam	0.00692 ( 16 of 2312 genes )	0.00262 ( 89 of 34011 annotated genes )	0.0002526	0.8873	Shroom2, Map3k1, Grb2, Neb, Ssh3, Kirrel, Jmy, Eln, Arpc2, Slit2, Fert2, Arpc3, Capza2, Spna2, Tpm1, Evl,
GO:0061061	muscle structure developm	0.02033 ( 47 of 2312 genes )	0.01211 ( 412 of 34011 annotated genes )	0.0002572	0.9037	Pdgfra, Dll4, Nrg1, Cdk5, Boc, Gsk3b, Stra6, Dok7, Pbrm1, Ilk, Unc45a, Dmd, Myl3, Bnip2, Hdac4, Mov10l1, Tsc1, Zfp238, Spag9, Hey2, Itgb1, Mybpc3, Alx4, Etv1, Col11a1, Ppp3ca, Neb, Pias1, Mbnl1, Fgfr1, Cacna1s, Nfatc4, Erbb4, AW551984, Dicer1, Qk, Col3a1, Eln, Ankrd1, Agrn, Ryr1, Tnnt2, Ryr2, Sema4c, Acvr1, Tpm1, Chrnd,
GO:0043410	positive regulation of MA	0.01125 ( 26 of 2312 genes )	0.00544 ( 185 of 34011 annotated genes )	0.0002692	0.9455	Dixdc1, Pdgfra, Cd36, Fgfr1, Mink1, Lepr, Ilk, Sema7a, Zfp622, Gab1, Erbb4, Bnip2, Lpar1, Gcg, Itgb3, Spag9, Npnt, Fgf21, Csf1r, Sema4c, Ksr1, Itgb1, Ryk, Ntrk2, Cd74, Taok1,
GO:0042063	gliogenesis	0.01038 ( 24 of 2312 genes )	0.00485 ( 165 of 34011 annotated genes )	0.0002709	0.9515	Mycn, Lgi4, Erbb3, Pparg, Nrg1, Cdk5, Sox5, Serpine2, Reln, Eif2b4, Areg, Sox10, Hes5, Pax6, Dmd, Nfib, Dicer1, Trp73, Arhgef7, Gpc1, Lyn, Prkci, Sox11, Ntrk2,
GO:0090100	positive regulation of tr	0.00562 ( 13 of 2312 genes )	0.00188 ( 64 of 34011 annotated genes )	0.0002722	0.9562	Smad2, Inhba, Bmp7, Npnt, Furin, Acvr1, Ilk, Rbpms, Sox11, Itga8, Hes5, Tgfbr1, Zfp423,
GO:0072503	cellular divalent inorgan	0.01471 ( 34 of 2312 genes )	0.00791 ( 269 of 34011 annotated genes )	0.0002758	0.969	Slc39a14, Pdgfra, Prkcb, Disc1, Pygm, Ryr3, Mchr1, Atp2a2, Casq2, Slc39a4, Agtr1a, Bank1, Hc, Itgb1, Gna13, Slc8a3, Atp2c1, Gnb1, Sv2a, Slc39a13, Jak2, Cacna1f, Asph, Lpar1, Itgb3, Ccl5, Fkbp1b, Cdh23, Ryr1, Ryr2, Lyn, Gtf2i, Plcg2, Uts2,
GO:0030048	actin filament-based move	0.00346 ( 8 of 2312 genes )	0.00079 ( 27 of 34011 annotated genes )	0.0002779	0.9764	Apbb1, Apbb2, Tnnt2, Sun2, Fnbp1l, Syne2, Evl, Myrip,
GO:0072507	divalent inorganic cation	0.01514 ( 35 of 2312 genes )	0.00823 ( 280 of 34011 annotated genes )	0.00028	0.9835	Slc39a14, Pdgfra, Prkcb, Disc1, Gnas, Pygm, Ryr3, Mchr1, Atp2a2, Casq2, Slc39a4, Agtr1a, Bank1, Hc, Itgb1, Gna13, Slc8a3, Atp2c1, Sv2a, Gnb1, Slc39a13, Jak2, Cacna1f, Asph, Lpar1, Itgb3, Ccl5, Fkbp1b, Cdh23, Ryr1, Ryr2, Lyn, Gtf2i, Plcg2, Uts2,
GO:0007267	cell-cell signaling	0.03071 ( 71 of 2312 genes )	0.02049 ( 697 of 34011 annotated genes )	0.0002885	1	Dio2, Prkcb, Nrg1, Gria4, Disc1, Mink1, Camk2b, Cnr2, Kcnma1, Ptprf, Dmd, Xbp1, Grm3, Rgs14, Hc, Anxa1, Pfkfb2, Pim3, Ppp3ca, Ap2b1, Fgfr1, Apba2, Hnmt, Sv2a, Frs2, Slc5a7, Nfatc4, Slc18a1, Myo6, Bhlha15, Gcg, Ccl5, Htr7, Hmgn3, Dlgap4, Lyn, Lrp2, Lama2, Uts2, Creb1, Pclo, Slc18a2, Inhba, Gsk3b, Cdk5, Serpine2, Kcnc3, Dlgap5, Sh3gl2, Rab3a, Arhgef15, Smad2, Panx1, Ntrk2, Doc2b, Pcdhb16, Reln, Sre…
GO:0045765	regulation of angiogenesi	0.00995 ( 23 of 2312 genes )	0.00459 ( 156 of 34011 annotated genes )	0.0002946	1	Bai1, Tnfrsf1a, Prkcb, Cd36, Vash1, Lect1, Klf4, Pik3r6, Rras, Amot, Krit1, Ctsh, Adora2b, Ccl5, Plcg1, Serpinf1, Hc, Gtf2i, Sema4a, Tspan12, Uts2, C6, Rock2,
GO:0016032	viral reproduction	0.00865 ( 20 of 2312 genes )	0.00373 ( 127 of 34011 annotated genes )	0.0002963	1	Oas3, Map3k1, Bat1a, Oasl1, Tarbp2, Cul1, Top2a, Inpp5k, Rsf1, Hyal2, Etf1, Zfp287, Zkscan14, Nlrx1, Dicer1, Ccl5, Vcam1, Hbxip, Zscan2, Zscan20,
GO:0010032	meiotic chromosome conden	0.00130 ( 3 of 2312 genes )	0.00009 ( 3 of 34011 annotated genes )	0.0002989	1	Stra8, Smc2, Smc4,
GO:0043928	exonucleolytic nuclear-tr	0.00130 ( 3 of 2312 genes )	0.00009 ( 3 of 34011 annotated genes )	0.0002989	1	Exosc3, Exosc5, Exosc9,
GO:0048813	dendrite morphogenesis	0.00606 ( 14 of 2312 genes )	0.00215 ( 73 of 34011 annotated genes )	0.0003021	1	Kndc1, Sgk1, Dscam, Cdk5, Gsk3b, Dclk1, Atp7a, Reln, Mink1, Cacna1f, Ilk, Camk2b, Ptprd, Ptprf,
GO:0043069	negative regulation of pr	0.02811 ( 65 of 2312 genes )	0.01841 ( 626 of 34011 annotated genes )	0.000304	1	Erbb3, Nrg1, Birc6, Atad3a, Msh2, Krit1, Ptgfr, Apip, Tmem132a, Hsp90b1, Agtr1a, Polb, Hbxip, Plac8, Pik3ca, Hsp90ab1, Anxa1, Pim3, Itsn1, Scg2, Fgfr1, Atp7a, Nefl, Rrn3, Araf, Tgfbr1, Trp73, Gcg, Ccl5, Hipk3, Lifr, Alb, Cd74, Pcid2, Il7, Faim, Traf2, Gsk3b, Sox10, G2e3, Ilk, Son, Sgk1, Cbl, Gclm, Bard1, Hey2, Hells, Rxfp2, Prkci, Qars, Ntrk2, Ptprj, Lhx3, Ctsh, Erbb4, Dicer1, Apbb2, Slc2a3, Bmp7…
GO:0022613	ribonucleoprotein complex	0.01211 ( 28 of 2312 genes )	0.00609 ( 207 of 34011 annotated genes )	0.0003053	1	Bat1a, Rpf1, Tarbp2, Tfb2m, Mbnl1, Rpl5, Rps28, Rrn3, Celf2, Isg20, Exosc3, Srsf2ip, Exosc5, 2410016O06Rik, Rplp0, Lsm14a, Nop58, Dicer1, Tsc1, Rpl24, Rcl1, Patl1, Gnl2, Exosc8, Utp14a, Nol9, Utp6, Exosc9,
GO:0033157	regulation of intracellul	0.00952 ( 22 of 2312 genes )	0.00432 ( 147 of 34011 annotated genes )	0.0003187	1	Tnfrsf1a, Tacc3, Cd36, Cdk5, Gsk3b, Fzd7, Inpp5k, Jak2, Faf1, Hyal2, Tgfbr1, Ubr5, Tmem30b, Rbm22, Erbb4, Rbck1, Bard1, Flna, Hsp90ab1, Rbpms, Cyld, Fbxw11,
GO:0040017	positive regulation of lo	0.01341 ( 31 of 2312 genes )	0.00703 ( 239 of 34011 annotated genes )	0.0003189	1	Ptprj, Scg2, Pdgfra, Dscam, Slit2, Itga2b, Map2k2, Col1a1, Gnb2l1, Amot, Ctsh, Jak2, Ilk, Figf, Erbb4, Onecut2, Lpar1, Itgb3, Ccl5, Spag9, Fert2, Plcg1, Furin, Csf1r, Sun2, Lyn, Hc, Itgb1, Syne2, Cd74, Uts2,
GO:0043112	receptor metabolic proces	0.00865 ( 20 of 2312 genes )	0.00376 ( 128 of 34011 annotated genes )	0.0003294	1	Ift122, Rspo1, Pparg, Nrg1, Cdk5, Ghr, Sh3gl2, Cltc, Dok7, Scyl2, Dmd, Agtr1a, Grb2, Itgb3, Ahi1, Gtf2h2, Agrn, Adrbk1, Furin, Flna,
GO:0050878	regulation of body fluid	0.01168 ( 27 of 2312 genes )	0.00585 ( 199 of 34011 annotated genes )	0.0003687	1	Ptprj, Proz, Creb1, Pdgfra, Gna13, Cd36, Serpine2, Itga2b, Otog, Wnk1, Slc9a3r1, Hps5, Sytl2, Kcnma1, Aqp2, Evl, Fhad1, Erbb4, Trp73, Rab27a, Itgb3, Aprt, Hsd11b2, Lyn, Tac4, Tfpi, Uts2,
GO:0043954	cellular component mainte	0.00389 ( 9 of 2312 genes )	0.00103 ( 35 of 34011 annotated genes )	0.0003787	1	Ercc6, Shroom2, Rp1l1, Plekha7, Abca4, Cdh23, Ush1c, Csf1r, Tulp1,
GO:0080135	regulation of cellular re	0.01298 ( 30 of 2312 genes )	0.00679 ( 231 of 34011 annotated genes )	0.0003862	1	Terf2ip, Apbb1, Dixdc1, Rps3, Wac, Ercc6, Map3k1, Nbr1, Map4k4, Traf2, Cd36, Mink1, Fktn, Map2k2, Zfp622, Gab1, Trp73, Chek1, Setd8, 5430437P03Rik, Ankrd1, Hipk3, Spag9, Sema4c, Sh3rf1, Lyn, Mapk8ip3, Cd74, Magi3, Taok1,
GO:0006891	intra-Golgi vesicle-media	0.00260 ( 6 of 2312 genes )	0.00047 ( 16 of 34011 annotated genes )	0.000397	1	Copg2, Cog2, Cux1, Copb2, Copb1, Rab6,
GO:0010761	fibroblast migration	0.00303 ( 7 of 2312 genes )	0.00065 ( 22 of 34011 annotated genes )	0.0004137	1	Fert2, Tns1, Syne2, Hyal2, Itgb3, Sgpl1, Uts2,
GO:0043462	regulation of ATPase acti	0.00303 ( 7 of 2312 genes )	0.00065 ( 22 of 34011 annotated genes )	0.0004137	1	Tnnt3, Tnnt2, Aldob, Rab3a, Ahsa1, Tpm1, Rab6,
GO:0045773	positive regulation of ax	0.00303 ( 7 of 2312 genes )	0.00065 ( 22 of 34011 annotated genes )	0.0004137	1	Trpv2, Tnfrsf12a, Dscam, Ilk, Sema7a, Mapt, Disc1,
GO:0051647	nucleus localization	0.00303 ( 7 of 2312 genes )	0.00065 ( 22 of 34011 annotated genes )	0.0004137	1	Dmd, Hook3, Ciz1, Sun2, Tacc3, Cdc42bpa, Syne2,
GO:0016055	Wnt receptor signaling pa	0.01600 ( 37 of 2312 genes )	0.00906 ( 308 of 34011 annotated genes )	0.0004174	1	Trpm4, Csnk2a2, Gsk3b, Ankrd6, Brd7, Frzb, Disc1, Cdc73, Fzd7, Macf1, Col1a1, Sox10, Ilk, Tnks2, Scyl2, Als2cr4, Stk4, Med12, Sulf2, Ryk, Senp2, Dkk2, Dixdc1, Rspo1, Slc9a3r1, Celsr1, Mark2, Ubr5, Aes, Ccny, Ptpru, Arl6, Fbxw4, Ryr2, Cyld, Fbxw11, Ccdc88c,
GO:0051216	cartilage development	0.00952 ( 22 of 2312 genes )	0.00441 ( 150 of 34011 annotated genes )	0.0004246	1	Mycn, Col11a1, Fgfr1, Sox5, Mef2d, Col9a1, Atp7a, Frzb, Lect1, Gnas, Col1a1, Hoxa3, Hes5, Tgfbr1, Nfib, Col11a2, Bmp7, Fbxw4, Bmpr1b, Osr2, Ltbp3, Sulf2,
GO:0015672	monovalent inorganic cati	0.01773 ( 41 of 2312 genes )	0.01038 ( 353 of 34011 annotated genes )	0.0004262	1	Slc12a7, Atp5j2, Dpp6, Serpine2, Kcnc3, Catsper4, Gnas, Slc12a1, Kcnma1, Casq2, Atp1a4, Scn9a, Sgk1, Tsc1, Scn4a, Atp1b3, Ank1, Slc10a2, Atp4b, Slc38a4, Prss8, Slc13a5, Slc4a10, Nedd4l, Slc8a3, Kcnu1, Slc2a4, Slc9a3r1, Slc5a7, Slc9a3, Slc4a8, Slc1a1, Ahcyl1, Scn10a, Kcnh6, Scn3a, Slc9a5, Slc34a1, Kcnk6, Kcnj6, Kcnk2,
GO:0051100	negative regulation of bi	0.00995 ( 23 of 2312 genes )	0.00470 ( 160 of 34011 annotated genes )	0.0004265	1	Rps3, Hr, Gsk3b, Nlrc5, Klf4, Fam72a, Jak2, Rsf1, Glis2, Habp4, Nfib, Hdac4, Aes, Rbck1, Traf3, Spag9, Peli1, Wwp2, Flna, Cyld, Pex14, Usp7, Senp2,
GO:0050773	regulation of dendrite de	0.00562 ( 13 of 2312 genes )	0.00197 ( 67 of 34011 annotated genes )	0.0004359	1	Kndc1, Sgk1, Lpar1, Kalrn, Cdk5, Gsk3b, Disc1, Reln, Ilk, Camk2b, Ptprd, Ntrk2, Ptprf,
GO:0008015	blood circulation	0.01644 ( 38 of 2312 genes )	0.00941 ( 320 of 34011 annotated genes )	0.0004414	1	Pparg, Map2k3, Gnas, Atp2a2, Kcnma1, Casq2, Myl3, Hdac4, Adora2b, Agtr1a, Adrbk1, Gclm, Corin, Hey2, Hsd11b2, Plcb3, Mybpc3, Ptprj, Nedd4l, Slit2, Srebf1, Slc9a3r1, Wnk1, Amot, Jak2, Enpep, Aqp2, Rap1gds1, Scn10a, Cartpt, Fkbp1b, Tnnt2, Ryr2, Pon1, Cacna1e, Tac4, Tpm1, Uts2,
GO:0046777	protein autophosphorylati	0.01081 ( 25 of 2312 genes )	0.00532 ( 181 of 34011 annotated genes )	0.0004555	1	Map3k1, Pdgfra, Mobkl1a, Cdk5, Fgfr1, Eef2k, Ephb4, Mink1, Wnk1, Jak2, Camk2b, Tgfbr1, Stk4, Mark2, Erbb4, Smg1, Jak1, Tssk2, Fert2, Csf1r, Myo3b, Clk3, Lyn, Ntrk2, Pim3,
GO:0051258	protein polymerization	0.00908 ( 21 of 2312 genes )	0.00415 ( 141 of 34011 annotated genes )	0.0004605	1	Map3k1, Tubb4, Kirrel, Jmy, Slit2, Clip3, Arpc3, Nefl, Capza2, Evl, Fhad1, Sgk1, Tubb6, Grb2, Mapt, Arpc2, Eln, Diap2, Fert2, Tpm1, Spna2,
GO:0006941	striated muscle contracti	0.00606 ( 14 of 2312 genes )	0.00223 ( 76 of 34011 annotated genes )	0.0004653	1	Myl3, Hdac4, Scn10a, Jsrp1, Map2k3, Fkbp1b, Cacna1s, Tnnt3, Adrbk1, Ryr2, Ryr3, Mybpc3, Tpm1, Casq2,
GO:0048839	inner ear development	0.00995 ( 23 of 2312 genes )	0.00473 ( 161 of 34011 annotated genes )	0.0004667	1	Col11a1, H2-DMa, Fgfr1, H2-K1, Otx1, Frzb, Abr, Celsr1, Sobp, Itga8, Cux1, Hes5, Kcnma1, Myo6, Dicer1, Tmie, Ahi1, Cdh23, Ush1c, Hey2, Igfbp7, Mpv17, Mcoln3,
GO:0003013	circulatory system proces	0.01644 ( 38 of 2312 genes )	0.00944 ( 321 of 34011 annotated genes )	0.0004691	1	Pparg, Map2k3, Gnas, Atp2a2, Kcnma1, Casq2, Myl3, Hdac4, Adora2b, Agtr1a, Adrbk1, Gclm, Corin, Hey2, Hsd11b2, Plcb3, Mybpc3, Ptprj, Nedd4l, Slit2, Srebf1, Slc9a3r1, Wnk1, Amot, Jak2, Enpep, Aqp2, Rap1gds1, Scn10a, Cartpt, Fkbp1b, Tnnt2, Ryr2, Pon1, Cacna1e, Tac4, Tpm1, Uts2,
GO:0006917	induction of apoptosis	0.01557 ( 36 of 2312 genes )	0.00879 ( 299 of 34011 annotated genes )	0.0004747	1	Brca2, Ercc6, Dedd, Pparg, Gsk3b, Inhba, Msh2, Camk2b, Ripk3, Trp53bp2, Stk4, Map3k5, Ptpn6, Rab27a, Tnfrsf12a, Bat3, Hc, Usp7, Rps3, B2m, Jmy, H2-K1, Jak2, Ctsh, Muc2, Tgfbr1, Zfp622, Trp73, Ryr2, Aifm3, Nlrp1a, Sh3rf1, Il12a, Cyld, Ppp2r5c, C6,
GO:0051225	spindle assembly	0.00389 ( 9 of 2312 genes )	0.00106 ( 36 of 34011 annotated genes )	0.0004752	1	Ino80, Haus2, Dicer1, Mybl2, Sac3d1, Ccdc52, Cltc, Flna, Haus6,
GO:0042462	eye photoreceptor cell de	0.00346 ( 8 of 2312 genes )	0.00085 ( 29 of 34011 annotated genes )	0.0004765	1	Pax6, Cnga3, Gnat2, Rorb, Prkci, Ntrk2, Tulp1, Olfm3,
GO:0001934	positive regulation of pr	0.01384 ( 32 of 2312 genes )	0.00753 ( 256 of 34011 annotated genes )	0.0004982	1	Tnfrsf1a, Kndc1, Cd36, Gsk3b, Inhba, Ghr, Fam129a, Reln, Gnas, Clip3, Dock7, Gnb2l1, Araf, Dok7, Jak2, Hes5, Tgfbr1, Erbb4, Gcg, Bmp7, Itgb3, Ccl5, Agrn, Csf1r, Pik3ca, Acvr1, Lyn, Rbpms, Itgb1, Il12a, Senp2, Cd74,
GO:0006644	phospholipid metabolic pr	0.01254 ( 29 of 2312 genes )	0.00659 ( 224 of 34011 annotated genes )	0.0005036	1	Cdipt, Pi4k2a, Pla2g4d, Pip4k2c, Pla2g4f, Pikfyve, Smpdl3a, Pigc, Ept1, Inpp5k, Oc90, Pik3c2g, Pigx, Impa1, Sacm1l, Ocrl, Aspg, Smg1, Ip6k2, Inpp4b, Plcg1, Pigk, Pign, Csf1r, Plcb3, Pik3ca, Pon1, Plcg2, Gnpat,
GO:0003001	generation of a signal in	0.01557 ( 36 of 2312 genes )	0.00882 ( 300 of 34011 annotated genes )	0.0005054	1	Dio2, Pclo, Creb1, Slc18a2, Prkcb, Inhba, Kcnc3, Rab3a, Smad2, Xbp1, Hc, Anxa1, Ntrk2, Pim3, Pfkfb2, Doc2b, Ppp3ca, Ap2b1, Srebf1, Jak2, Celsr1, Cplx1, Stx4a, Myo6, Slc18a1, Cartpt, Gcg, Fkbp1b, Htr7, Hmgn3, Cacna1e, Lyn, Sox11, Lrp2, Myrip, Uts2,
GO:0012502	induction of programmed c	0.01557 ( 36 of 2312 genes )	0.00882 ( 300 of 34011 annotated genes )	0.0005054	1	Brca2, Ercc6, Dedd, Pparg, Gsk3b, Inhba, Msh2, Camk2b, Ripk3, Trp53bp2, Stk4, Map3k5, Ptpn6, Rab27a, Tnfrsf12a, Bat3, Hc, Usp7, Rps3, B2m, Jmy, H2-K1, Jak2, Ctsh, Muc2, Tgfbr1, Zfp622, Trp73, Ryr2, Aifm3, Nlrp1a, Sh3rf1, Il12a, Cyld, Ppp2r5c, C6,
GO:0023061	signal release	0.01557 ( 36 of 2312 genes )	0.00882 ( 300 of 34011 annotated genes )	0.0005054	1	Dio2, Pclo, Creb1, Slc18a2, Prkcb, Inhba, Kcnc3, Rab3a, Smad2, Xbp1, Hc, Anxa1, Ntrk2, Pim3, Pfkfb2, Doc2b, Ppp3ca, Ap2b1, Srebf1, Jak2, Celsr1, Cplx1, Stx4a, Myo6, Slc18a1, Cartpt, Gcg, Fkbp1b, Htr7, Hmgn3, Cacna1e, Lyn, Sox11, Lrp2, Myrip, Uts2,
GO:0030177	positive regulation of Wn	0.00562 ( 13 of 2312 genes )	0.00200 ( 68 of 34011 annotated genes )	0.0005063	1	Ubr5, Dixdc1, Rspo1, Trpm4, Ankrd6, Disc1, Cdc73, Macf1, Col1a1, Tnks2, Ilk, Sulf2, Dkk2,
GO:0080134	regulation of response to	0.02465 ( 57 of 2312 genes )	0.01597 ( 543 of 34011 annotated genes )	0.0005288	1	Terf2ip, Apbb1, Ercc6, Map4k4, Pdgfra, Traf2, Pparg, Tarbp2, Chordc1, Serpine2, Mink1, Map2k2, Abr, Cd276, Sema7a, Cnr2, Gab1, Mill2, Adora2b, 5430437P03Rik, Traf3, Spag9, Peli1, Cr1l, Fabp4, Anxa1, Taok1, Ptprj, Rps3, Dixdc1, Tnfrsf1a, Wac, Map3k1, Nbr1, Cd36, Slit2, Nlrc5, Fktn, Jak2, Hyal2, Zfp622, Trp73, Chek1, Setd8, Ankrd1, Hipk3, Ccl5, Sema4c, Sh3rf1, Lyn, Serpinf1, Il12a, Mapk8ip3, Cd74, …
GO:0048589	developmental growth	0.01427 ( 33 of 2312 genes )	0.00788 ( 268 of 34011 annotated genes )	0.0005377	1	Brca2, Nrg1, Stra6, Disc1, Ninj1, Areg, Fzd7, Sox10, 2400003C14Rik, Ilk, Sema7a, Trpv2, Smad2, Tnfrsf12a, Med12, Mapt, Hey2, Gins1, Ryk, Psap, Dscam, Fgfr1, Nipbl, Col9a1, Dclk1, Slit2, Erbb4, Bin3, Taf8, Agrn, Mll2, Bmpr1b, Chrnd,
GO:0000209	protein polyubiquitinatio	0.00692 ( 16 of 2312 genes )	0.00279 ( 95 of 34011 annotated genes )	0.0005406	1	Ubr5, Ppil2, Map3k1, Traf2, Rbck1, Ube2a, Rnf187, Ube2d1, Bard1, Peli1, Chfr, G2e3, Wwp2, Ube3c, Tnks2, Fbxw11,
GO:0032886	regulation of microtubule	0.00692 ( 16 of 2312 genes )	0.00279 ( 95 of 34011 annotated genes )	0.0005406	1	Dixdc1, Tacc3, Chordc1, Gsk3b, Dst, Ccdc52, Clip3, Macf1, Ska1, Gas2l1, Sgk1, Mapt, Chek1, Cyld, Clasp1, Rock2,
GO:0006401	RNA catabolic process	0.00649 ( 15 of 2312 genes )	0.00253 ( 86 of 34011 annotated genes )	0.0005443	1	Papd5, Ncbp1, Smg1, Lsm1, Dcp2, Rnaseh2b, Patl1, Pnpt1, Xrn1, Dna2, Isg20, Exosc3, Exosc5, Etf1, Exosc9,
GO:0042490	mechanoreceptor different	0.00476 ( 11 of 2312 genes )	0.00153 ( 52 of 34011 annotated genes )	0.0005495	1	Myo6, Dicer1, Fgfr1, Cdh23, Ush1c, Hey2, Cux1, Hes5, Kcnma1, Ntrk2, Mcoln3,
GO:0008202	steroid metabolic process	0.01298 ( 30 of 2312 genes )	0.00694 ( 236 of 34011 annotated genes )	0.0005545	1	Hsd3b3, Pdgfra, Dhrs4, Ebpl, Srebf1, Cacna1h, Sc5d, Lepr, Abca2, Tm7sf2, Soat1, Acbd3, Kcnma1, Hsd17b3, Apob, Adora2b, Aplp2, Slc27a5, Dhrs9, Hsd3b2, Dhcr7, Hsd11b2, Igfbp7, Hmgcs1, Hsd3b6, Pon1, Bmpr1b, Hsd17b12, Sgpl1, Abcg1,
GO:0045132	meiotic chromosome segreg	0.00303 ( 7 of 2312 genes )	0.00068 ( 23 of 34011 annotated genes )	0.0005606	1	Brca2, Top2a, Stra8, Sgol1, Espl1, Smc2, Smc4,
GO:0043010	camera-type eye developme	0.01341 ( 31 of 2312 genes )	0.00726 ( 247 of 34011 annotated genes )	0.000564	1	Megf11, Dixdc1, Ift122, Map3k1, Nphp1, Pdgfra, Dscam, Inhba, Sp3, Tulp3, Stra6, Cacna1s, Gnb1, Frs2, Klf4, Cacna1f, Crx, Hes5, Tgfbr1, Tulp1, Pax6, Shroom2, Cnga3, Gnat2, Rpl24, Bmp7, Ahi1, Bmpr1b, Osr2, Sox11, Tspan12,
GO:0002520	immune system development	0.02638 ( 61 of 2312 genes )	0.01744 ( 593 of 34011 annotated genes )	0.0005802	1	Pcid2, Brca2, Il7, Pparg, Tacc3, Inhba, Sp3, Cdc73, Jag2, Gnas, Mink1, Fzd7, Msh2, Exosc3, Stk4, Pms2, Ptpn6, Ncaph2, Pglyrp3, Mll5, Hmgb3, Lgals8, Ankrd54, Ahctf1, Csf1r, Hells, Rbfox2, Anxa1, Ank1, Jam3, Sgpl1, Sema4a, Il27, Ltb, Mknk2, B2m, H2-DMa, Atp7a, Gmpr2, Klf4, Ctla4, Eomes, Jak2, Hoxa3, H2-Q1, Tgfbr1, Prmt1, Gas2l1, Dicer1, Cartpt, Il17a, Itgb3, Ccl5, Gab3, Clec2g, Mll1, Csf3, Lyn, Rbm…
GO:0043254	regulation of protein com	0.01081 ( 25 of 2312 genes )	0.00541 ( 184 of 34011 annotated genes )	0.0005833	1	Map3k1, Creb1, Kirrel, Gsk3b, Jmy, Slit2, Ide, Clip3, Arpc3, Rrn3, Gnb2l1, Faf1, Capza2, Mpp7, Evl, Sgk1, Atf7ip, Grb2, Mapt, Eln, Arpc2, Fert2, Hey2, Spna2, Tpm1,
GO:0051028	mRNA transport	0.00562 ( 13 of 2312 genes )	0.00203 ( 69 of 34011 annotated genes )	0.0005861	1	Fmr1, Nup93, Ncbp1, Bat1a, Nup160, Qk, Nup107, Ahctf1, Nxf1, Hnrnpa3, Lrpprc, Senp2, Nup214,
GO:0010882	regulation of cardiac mus	0.00173 ( 4 of 2312 genes )	0.00021 ( 7 of 34011 annotated genes )	0.000593	1	Ryr2, Hdac4, Fkbp1b, Casq2,
GO:0051657	maintenance of organelle	0.00173 ( 4 of 2312 genes )	0.00021 ( 7 of 34011 annotated genes )	0.000593	1	Arhgap21, Ciz1, Alb, Grinl1a,
GO:0043406	positive regulation of MA	0.00908 ( 21 of 2312 genes )	0.00423 ( 144 of 34011 annotated genes )	0.0006121	1	Ercc6, Map3k1, Maged1, Traf2, Fgfr1, Map2k3, Ghr, Frs2, Map2k2, Pik3r6, Ilk, Map3k5, Gab1, Pxn, Lpar1, Trp73, Pde6h, Spag9, Mapk8ip3, Magi3, Cd74,
GO:0000187	activation of MAPK activi	0.00649 ( 15 of 2312 genes )	0.00256 ( 87 of 34011 annotated genes )	0.0006176	1	Gab1, Map3k5, Ercc6, Pxn, Map3k1, Trp73, Lpar1, Pde6h, Map2k3, Ghr, Spag9, Frs2, Map2k2, Mapk8ip3, Cd74,
GO:0048704	embryonic skeletal system	0.00649 ( 15 of 2312 genes )	0.00256 ( 87 of 34011 annotated genes )	0.0006176	1	Mycn, Col11a1, Pdgfra, Smad2, Dscaml1, Tulp3, Bmp7, Nipbl, Gnas, Hoxb5, Hoxa3, Sox11, Osr2, Tgfbr1, Alx4,
GO:0014065	phosphatidylinositol 3-ki	0.00519 ( 12 of 2312 genes )	0.00179 ( 61 of 34011 annotated genes )	0.0006284	1	Ptpn6, Erbb3, Cbl, Slc9a3r2, Serpine2, Ccl5, Reln, Klf4, Slc9a3r1, Jak2, Ltk, Ntrk2,
GO:0035239	tube morphogenesis	0.01600 ( 37 of 2312 genes )	0.00926 ( 315 of 34011 annotated genes )	0.0006399	1	Ift122, Vasp, Dll4, Tulp3, Areg, Tead1, Ilk, Hs2st1, Stk4, Agtr1a, Med12, Tsc1, Ift172, Mycn, Ppp3r1, Gna13, Maged1, Rasip1, Hectd1, Slit2, Ctsh, Celsr1, Luzp1, Nfatc4, Pxn, Dicer1, Bmp7, Npnt, Ahi1, Lias, Ryr2, Sema4c, Mib1, Rbm15, Acvr1, Sox11, Rock2,
GO:0044087	regulation of cellular co	0.01600 ( 37 of 2312 genes )	0.00926 ( 315 of 34011 annotated genes )	0.0006399	1	Creb1, Gsk3b, Ide, Ift46, Arpc3, Macf1, Gnb2l1, Faf1, Capza2, Mpp7, Sdc4, Sgk1, Grb2, Atf7ip, Mapt, Tsc1, Hey2, Myo3b, Ptprj, Map3k1, Ssh3, Jmy, Kirrel, Slit2, Clip3, Rrn3, Inpp5k, Tgfbr1, Evl, Arpc2, Eln, Agrn, Fert2, Fnbp1l, Kbtbd10, Tpm1, Spna2,
GO:0034660	ncRNA metabolic process	0.01341 ( 31 of 2312 genes )	0.00732 ( 249 of 34011 annotated genes )	0.0006467	1	Ints9, Hars2, Rpf1, Tarbp2, Dus1l, Tfb2m, Rpl5, Lars, Adat2, Rps28, Tyw1, Tdrd9, Isg20, Exosc3, Dars2, Exosc5, Ints5, Lars2, Nars2, Iars2, Mettl1, Dicer1, Piwil4, Vars, Rcl1, Xrn1, Exosc8, Utp14a, Nol9, Utp6, Exosc9,
GO:0045669	positive regulation of os	0.00476 ( 11 of 2312 genes )	0.00156 ( 53 of 34011 annotated genes )	0.000652	1	Pdlim7, Bmp7, Npnt, Gnas, Acvr1, Bmpr1b, Ilk, Cd276, Fam20c, Sox11, Fbn2,
GO:0043066	negative regulation of ap	0.02725 ( 63 of 2312 genes )	0.01823 ( 620 of 34011 annotated genes )	0.0006538	1	Pcid2, Faim, Il7, Erbb3, Traf2, Nrg1, Gsk3b, Birc6, Atad3a, Msh2, G2e3, Sox10, Krit1, Ilk, Ptgfr, Apip, Son, Sgk1, Hsp90b1, Cbl, Agtr1a, Polb, Bard1, Gclm, Hey2, Rxfp2, Hbxip, Plac8, Pik3ca, Hells, Hsp90ab1, Anxa1, Qars, Prkci, Ntrk2, Pim3, Itsn1, Ptprj, Scg2, Lhx3, Fgfr1, Atp7a, Nefl, Rrn3, Araf, Ctsh, Tgfbr1, Erbb4, Trp73, Dicer1, Apbb2, Gcg, Ccl5, Bmp7, Hipk3, Slc2a3, Ahi1, Furin, Lifr, Sh3rf1…
GO:0001558	regulation of cell growth	0.01427 ( 33 of 2312 genes )	0.00797 ( 271 of 34011 annotated genes )	0.0006543	1	Apbb1, Ino80, Il7, Pparg, Nrg1, Inhba, Serpine2, Frzb, Disc1, Gnb2l1, Tro, Ilk, 2400003C14Rik, Sema7a, Ip6k2, Sgk1, Trpv2, Sbf1, Tnfrsf12a, Mapt, Igfbp7, Ryk, Rbbp7, Ptprj, Dscam, Smarca2, Slit2, Htra3, Hyal2, Tgfbr1, Gas2l1, Apbb2, Exosc9,
GO:0048534	hemopoietic or lymphoid o	0.02509 ( 58 of 2312 genes )	0.01647 ( 560 of 34011 annotated genes )	0.0006611	1	Pcid2, Brca2, Il7, Pparg, Tacc3, Inhba, Sp3, Cdc73, Jag2, Gnas, Mink1, Fzd7, Msh2, Stk4, Ptpn6, Ncaph2, Pglyrp3, Mll5, Hmgb3, Lgals8, Ankrd54, Ahctf1, Csf1r, Hells, Rbfox2, Anxa1, Ank1, Jam3, Sgpl1, Sema4a, Il27, Ltb, Mknk2, B2m, H2-DMa, Atp7a, Gmpr2, Klf4, Ctla4, Eomes, Jak2, Hoxa3, Tgfbr1, Prmt1, Gas2l1, Dicer1, Cartpt, Il17a, Itgb3, Ccl5, Gab3, Clec2g, Mll1, Csf3, Lyn, Rbm15, Plcg2, Cd74,
GO:0070302	regulation of stress-acti	0.00865 ( 20 of 2312 genes )	0.00397 ( 135 of 34011 annotated genes )	0.0006656	1	Dixdc1, Ercc6, Map3k1, Nbr1, Map4k4, Traf2, Mink1, Fktn, Map2k2, Zfp622, Gab1, Trp73, Hipk3, Spag9, Sema4c, Sh3rf1, Lyn, Mapk8ip3, Magi3, Taok1,
GO:0034097	response to cytokine stim	0.01600 ( 37 of 2312 genes )	0.00929 ( 316 of 34011 annotated genes )	0.000679	1	Ciita, Traf2, Pparg, Aff3, Pnpt1, Ptprf, Gab1, Ptpn6, Hdac4, Jak1, Traf3, Csf1r, Prkci, Tnfrsf1a, Duox1, Ptprn, Osmr, Ghr, Slit2, Nlrc5, Serpina3c, Klf4, Inpp5k, Jak2, Lepr, Hyal2, Il1r1, Cxcr6, Aes, Col3a1, Il17a, Ccl5, Ankrd1, Npnt, Fert2, Lifr, Cd74,
GO:0009968	negative regulation of si	0.02292 ( 53 of 2312 genes )	0.01473 ( 501 of 34011 annotated genes )	0.0006794	1	Rgs9, Cilp, Erbb3, Pparg, Prkcb, Slc9a3r2, Gsk3b, Ankrd6, Atxn7, Serpine2, Tulp3, Frzb, Fam72a, Sox10, Camk2b, Scyl2, Rps6ka6, Ptprf, Stk4, Ptpn6, Onecut2, Med12, Tsc1, Gtf2h2, Adrbk1, Hey2, Gpc1, Adamtsl2, Rgs14, Sulf2, Dkk2, Ptprj, Rgs4, Arap3, Lect1, Slit2, Nlrc5, Klf4, Fktn, Slc9a3r1, Inpp5k, Htra3, Fbn2, Glis2, Ubr1, Hyal2, Aes, Bmp7, Ccl5, Acvr1, Lyn, Cyld, Cd74,
GO:0016050	vesicle organization	0.00606 ( 14 of 2312 genes )	0.00232 ( 79 of 34011 annotated genes )	0.0006981	1	Doc2b, Shroom2, Ap2b1, Serpine2, Stx5a, Cd2ap, Vamp7, 5730419I09Rik, Mta1, Fnbp1l, Rab3a, Anxa1, Prkci, Eea1,
GO:0008064	regulation of actin polym	0.00649 ( 15 of 2312 genes )	0.00259 ( 88 of 34011 annotated genes )	0.0006992	1	Shroom2, Map3k1, Grb2, Ssh3, Kirrel, Jmy, Eln, Arpc2, Slit2, Fert2, Arpc3, Capza2, Spna2, Tpm1, Evl,
GO:0034623	cellular macromolecular c	0.00649 ( 15 of 2312 genes )	0.00259 ( 88 of 34011 annotated genes )	0.0006992	1	Shroom2, Gas2l1, Sgk1, Smarce1, Nrg1, Kif5b, Smarcc1, Capza2, Mtrf1l, Clasp1, Aqp2, Etf1, Spna2, Tpm1, Evl,
GO:0045185	maintenance of protein lo	0.00649 ( 15 of 2312 genes )	0.00259 ( 88 of 34011 annotated genes )	0.0006992	1	Brca2, Hook3, Tacc3, Taf8, Os9, Faf1, Sun2, Flna, Fbn2, Syne2, Sgol1, Pex14, Clasp1, Tln2, Morc3,
GO:0060074	synapse maturation	0.00216 ( 5 of 2312 genes )	0.00035 ( 12 of 34011 annotated genes )	0.000709	1	Reln, Erbb4, Camk2b, Arhgef15, Disc1,
GO:0046822	regulation of nucleocytop	0.00865 ( 20 of 2312 genes )	0.00400 ( 136 of 34011 annotated genes )	0.0007322	1	Tnfrsf1a, Tacc3, Cd36, Cdk5, Gsk3b, Fzd7, Jak2, Faf1, Hyal2, Tgfbr1, Ppp1r12a, Ubr5, Erbb4, Rbck1, Bard1, Flna, Hsp90ab1, Rbpms, Cyld, Fbxw11,
GO:0042391	regulation of membrane po	0.01427 ( 33 of 2312 genes )	0.00803 ( 273 of 34011 annotated genes )	0.0007438	1	Ndufs1, Trpm4, Cdk5, Slc9a3r2, Dpp6, Mpdz, Eif2b4, Cldn5, Best2, Ilk, Cnr2, Hes5, Kcnma1, Casq2, Atp1a4, Scn9a, Tsc1, Gclm, Gpc1, Jam3, Lgi4, Ppp3ca, Reln, Dicer1, Qk, Scn10a, Fam38b, Aifm3, Scn3a, Grin2c, Kcnk2, Chrnd, Gnpat,
GO:0048017	inositol lipid-mediated s	0.00303 ( 7 of 2312 genes )	0.00071 ( 24 of 34011 annotated genes )	0.000746	1	Csf1r, Pdgfra, Pik3ca, Plch1, Adap2, Pik3c2g, Car8,
GO:0060761	negative regulation of re	0.00303 ( 7 of 2312 genes )	0.00071 ( 24 of 34011 annotated genes )	0.000746	1	Nlrc5, Klf4, Aes, Pparg, Ccl5, Slit2, Ptprf,
GO:0016458	gene silencing	0.00692 ( 16 of 2312 genes )	0.00288 ( 98 of 34011 annotated genes )	0.0007683	1	Ubtf, Ncbp1, Tet1, Apobec1, Dicer1, Piwil4, Tarbp2, Phf8, Uty, Cbx8, Tdrd9, Mll2, Hells, Dnmt3a, Dnmt3b, Baz2a,
GO:0016525	negative regulation of an	0.00476 ( 11 of 2312 genes )	0.00159 ( 54 of 34011 annotated genes )	0.0007699	1	Bai1, Cd36, Vash1, Lect1, Klf4, Amot, Krit1, Serpinf1, Gtf2i, Sema4a, Rock2,
GO:0046530	photoreceptor cell differ	0.00433 ( 10 of 2312 genes )	0.00135 ( 46 of 34011 annotated genes )	0.0007748	1	Pax6, Rp1l1, Cnga3, Gnat2, Arl3, Rorb, Prkci, Ntrk2, Tulp1, Olfm3,
GO:0051320	S phase	0.00433 ( 10 of 2312 genes )	0.00135 ( 46 of 34011 annotated genes )	0.0007748	1	Apbb1, Ino80, Brca2, Dbf4, Apbb2, Chek1, Cul4b, Cdc73, Tfdp1, Anp32b,
GO:0060113	inner ear receptor cell d	0.00433 ( 10 of 2312 genes )	0.00135 ( 46 of 34011 annotated genes )	0.0007748	1	Myo6, Dicer1, Fgfr1, Cdh23, Ush1c, Hey2, Cux1, Kcnma1, Hes5, Mcoln3,
GO:0010657	muscle cell apoptosis	0.00346 ( 8 of 2312 genes )	0.00091 ( 31 of 34011 annotated genes )	0.0007769	1	Gnb1, Hey2, Pde1a, Ilk, Agtr1a, Nrg1, Il12a, Rbm10,
GO:0006261	DNA-dependent DNA replica	0.00562 ( 13 of 2312 genes )	0.00209 ( 71 of 34011 annotated genes )	0.0007779	1	Ino80, Nfkbil2, Brca2, Orc6, Clspn, Wrn, Rpain, Top2a, Mcm6, Dna2, Ciz1, Stra8, Stag2,
GO:0055074	calcium ion homeostasis	0.01384 ( 32 of 2312 genes )	0.00773 ( 263 of 34011 annotated genes )	0.0007932	1	Pdgfra, Gna13, Prkcb, Slc8a3, Atp2c1, Disc1, Sv2a, Gnb1, Gnas, Pygm, Jak2, Cacna1f, Mchr1, Ryr3, Atp2a2, Casq2, Asph, Lpar1, Agtr1a, Ccl5, Itgb3, Fkbp1b, Bank1, Cdh23, Ryr1, Ryr2, Lyn, Hc, Itgb1, Gtf2i, Plcg2, Uts2,
GO:0006874	cellular calcium ion home	0.01341 ( 31 of 2312 genes )	0.00744 ( 253 of 34011 annotated genes )	0.0008445	1	Pdgfra, Gna13, Prkcb, Slc8a3, Atp2c1, Disc1, Sv2a, Gnb1, Pygm, Jak2, Cacna1f, Mchr1, Ryr3, Atp2a2, Casq2, Asph, Lpar1, Agtr1a, Ccl5, Itgb3, Fkbp1b, Bank1, Cdh23, Ryr1, Ryr2, Lyn, Hc, Itgb1, Gtf2i, Plcg2, Uts2,
GO:0048193	Golgi vesicle transport	0.00692 ( 16 of 2312 genes )	0.00291 ( 99 of 34011 annotated genes )	0.0008604	1	Spast, Nbea, Vamp7, Macf1, Cux1, Copb2, Stx5a, Copg2, Rab1, Plcb3, Ergic1, Cog2, Ank1, Prkci, Rab6, Copb1,
GO:0050770	regulation of axonogenesi	0.00692 ( 16 of 2312 genes )	0.00291 ( 99 of 34011 annotated genes )	0.0008604	1	Dixdc1, Dscam, Ssh3, Slit2, Disc1, Nefl, Ilk, 2400003C14Rik, Sema7a, Mark2, Tnfrsf12a, Trpv2, Mapt, Chn1, Ntrk2, Ryk,
GO:0051222	positive regulation of pr	0.00952 ( 22 of 2312 genes )	0.00465 ( 158 of 34011 annotated genes )	0.0008695	1	Apbb1, Tnfrsf1a, Pcsk1, Cdk5, Gsk3b, Jak2, Hyal2, Tgfbr1, Ubr5, Tmem30b, Rbm22, Erbb4, Agtr1a, Rbck1, Panx1, Ankrd1, Nlrp1a, Csf1r, Flna, Hsp90ab1, Hc, Rbpms,
GO:0060537	muscle tissue development	0.01514 ( 35 of 2312 genes )	0.00876 ( 298 of 34011 annotated genes )	0.0008826	1	Pdgfra, Dll4, Nrg1, Cdk5, Boc, Stra6, Dok7, Ilk, Dmd, Myl3, Hdac4, Tsc1, Zfp238, Hey2, Itgb1, Mybpc3, Col11a1, Ppp3ca, Mbnl1, Fgfr1, Cacna1s, Itga8, Erbb4, AW551984, Dicer1, Col3a1, Ankrd1, Eln, Agrn, Tnnt2, Ryr1, Ryr2, Acvr1, Tpm1, Chrnd,
GO:0010001	glial cell differentiatio	0.00865 ( 20 of 2312 genes )	0.00406 ( 138 of 34011 annotated genes )	0.0008827	1	Mycn, Lgi4, Erbb3, Pparg, Nrg1, Cdk5, Sox5, Serpine2, Reln, Eif2b4, Sox10, Hes5, Pax6, Dmd, Nfib, Dicer1, Trp73, Gpc1, Sox11, Ntrk2,
GO:0019932	second-messenger-mediated	0.01384 ( 32 of 2312 genes )	0.00779 ( 265 of 34011 annotated genes )	0.0009017	1	Pclo, Pdgfra, Ppp3ca, Gna13, Cd36, Gnb1, Gnas, Fzd7, Slc9a3r1, Adap2, Pik3c2g, Casq2, Hdac4, Bhlha15, Gnat2, Lpar1, Ptgir, Adora2b, Plch1, Agtr1a, Dgkq, Gcg, Htr7, Fkbp1b, Grm3, Ryr2, Csf1r, Rxfp2, Pik3ca, Flna, Car8, Ntrk2,
GO:0000956	nuclear-transcribed mRNA	0.00476 ( 11 of 2312 genes )	0.00162 ( 55 of 34011 annotated genes )	0.0009049	1	Papd5, Ncbp1, Smg1, Lsm1, Dcp2, Patl1, Xrn1, Exosc3, Etf1, Exosc5, Exosc9,
GO:0001952	regulation of cell-matrix	0.00476 ( 11 of 2312 genes )	0.00162 ( 55 of 34011 annotated genes )	0.0009049	1	Ptprj, Sdc4, Onecut2, Cd36, Gsk3b, Tsc1, Disc1, Mink1, Macf1, Plekha2, Ilk,
GO:0030097	hemopoiesis	0.02336 ( 54 of 2312 genes )	0.01529 ( 520 of 34011 annotated genes )	0.0009339	1	Pcid2, Brca2, Il7, Pparg, Tacc3, Inhba, Sp3, Cdc73, Jag2, Gnas, Mink1, Fzd7, Msh2, Stk4, Ptpn6, Ncaph2, Pglyrp3, Mll5, Hmgb3, Lgals8, Ankrd54, Ahctf1, Csf1r, Hells, Rbfox2, Anxa1, Ank1, Jam3, Sgpl1, Sema4a, Il27, Mknk2, B2m, H2-DMa, Atp7a, Gmpr2, Klf4, Ctla4, Eomes, Jak2, Prmt1, Gas2l1, Cartpt, Il17a, Itgb3, Ccl5, Gab3, Clec2g, Mll1, Csf3, Lyn, Rbm15, Plcg2, Cd74,
GO:0033261	regulation of S phase	0.00346 ( 8 of 2312 genes )	0.00094 ( 32 of 34011 annotated genes )	0.0009757	1	Apbb1, Ino80, Brca2, Dbf4, Apbb2, Chek1, Cul4b, Cdc73,
GO:0000082	G1/S transition of mitoti	0.00692 ( 16 of 2312 genes )	0.00297 ( 101 of 34011 annotated genes )	0.001073	1	Ino80, Ppp3ca, Inhba, Brd7, Cdc73, Camk2b, Eif4e, Ptpn6, Rbbp8, Trp73, Usp37, Phf8, Rpl24, Acvr1, Itgb1, Ppp2r5c,
GO:0032271	regulation of protein pol	0.00692 ( 16 of 2312 genes )	0.00297 ( 101 of 34011 annotated genes )	0.001073	1	Map3k1, Kirrel, Jmy, Slit2, Clip3, Arpc3, Capza2, Evl, Sgk1, Grb2, Mapt, Arpc2, Eln, Fert2, Tpm1, Spna2,
GO:0010765	positive regulation of so	0.00216 ( 5 of 2312 genes )	0.00038 ( 13 of 34011 annotated genes )	0.001089	1	Gnas, Prss8, Sgk1, Nedd4l, Ahcyl1,
GO:0007044	cell-substrate junction a	0.00433 ( 10 of 2312 genes )	0.00141 ( 48 of 34011 annotated genes )	0.0011	1	Ptprj, Pxn, Sdc4, Tns1, Dst, Tsc1, Col17a1, Itgb3, Macf1, Itgb4,
GO:0014066	regulation of phosphatidy	0.00433 ( 10 of 2312 genes )	0.00141 ( 48 of 34011 annotated genes )	0.0011	1	Ptpn6, Cbl, Slc9a3r2, Serpine2, Ccl5, Reln, Klf4, Slc9a3r1, Jak2, Ntrk2,
GO:0014067	negative regulation of ph	0.00173 ( 4 of 2312 genes )	0.00024 ( 8 of 34011 annotated genes )	0.001123	1	Klf4, Slc9a3r1, Slc9a3r2, Serpine2,
GO:0090128	regulation of synapse mat	0.00173 ( 4 of 2312 genes )	0.00024 ( 8 of 34011 annotated genes )	0.001123	1	Reln, Camk2b, Arhgef15, Disc1,
GO:0010742	macrophage derived foam c	0.00260 ( 6 of 2312 genes )	0.00056 ( 19 of 34011 annotated genes )	0.00113	1	Apob, Pparg, Cd36, Soat1, Itgb3, Abcg1,
GO:0090077	foam cell differentiation	0.00260 ( 6 of 2312 genes )	0.00056 ( 19 of 34011 annotated genes )	0.00113	1	Apob, Pparg, Cd36, Soat1, Itgb3, Abcg1,
GO:0009636	response to toxin	0.00519 ( 12 of 2312 genes )	0.00191 ( 65 of 34011 annotated genes )	0.001134	1	Ercc6, Scn9a, Slc18a2, Ephx1, Ccl5, Atp7a, Scn3a, Pon1, Gucy2c, Trpm6, Slc6a14, Arnt,
GO:0000291	nuclear-transcribed mRNA	0.00130 ( 3 of 2312 genes )	0.00012 ( 4 of 34011 annotated genes )	0.001136	1	Exosc3, Exosc5, Exosc9,
GO:0071313	cellular response to caff	0.00130 ( 3 of 2312 genes )	0.00012 ( 4 of 34011 annotated genes )	0.001136	1	Ryr1, Ryr2, Casq2,
GO:0071415	cellular response to puri	0.00130 ( 3 of 2312 genes )	0.00012 ( 4 of 34011 annotated genes )	0.001136	1	Ryr1, Ryr2, Casq2,
GO:0008284	positive regulation of ce	0.02682 ( 62 of 2312 genes )	0.01829 ( 622 of 34011 annotated genes )	0.001154	1	Il7, Pdgfra, Trpm4, Nrg1, Disc1, Birc6, Areg, Fzd7, Ash2l, Mark4, Sox10, Cd276, Ilk, Hes5, Figf, Ptpn6, Pax6, Rptor, Hdac4, Adora2b, Agtr1a, Ube2a, Fgf21, Vcam1, Peli1, Hey2, Csf1r, Plac8, Txnl4b, Fabp4, Itgb1, Osr2, Prkci, Ntrk2, Efnb1, Mycn, Scg2, Rasip1, Osmr, Fgfr1, Jak2, Ctsh, Hoxa3, Tgfbr1, Akirin2, Rps4x, Erbb4, Gkn1, Rnf187, Suz12, Ccl5, Itgb3, Acer3, Fbxw4, Lifr, Csf3, Mll2, Lyn, Il12a, …
GO:0007229	integrin-mediated signali	0.00562 ( 13 of 2312 genes )	0.00218 ( 74 of 34011 annotated genes )	0.001163	1	Pxn, Itgb2l, Col3a1, Itgb3, Itga2b, Tyrobp, Ilk, Sema7a, Itgb1, Itga10, Itga8, Itgb7, Itgb4,
GO:0009314	response to radiation	0.01298 ( 30 of 2312 genes )	0.00726 ( 247 of 34011 annotated genes )	0.001167	1	Apbb1, Rad18, Ino80, Brca2, Ercc6, Apobec1, Cdk5, Wrn, Nipbl, Gnb1, Rpain, Msh2, Cacna1f, Hyal2, Trp53bp2, Tulp1, Nfatc4, Gnat2, Trp73, Sgk1, Grb2, Ube2a, Chek1, Col3a1, 5430437P03Rik, Clock, Cacna1e, Rgs14, Il12a, Lrp2,
GO:0043393	regulation of protein bin	0.00692 ( 16 of 2312 genes )	0.00300 ( 102 of 34011 annotated genes )	0.001195	1	Traf2, Nrg1, Cdk5, Gsk3b, Cald1, Fam72a, Krit1, Tgfbr1, Hdac4, Aes, Gcg, Aplp2, Spag9, Hsp90ab1, Pex14, Senp2,
GO:0019079	viral genome replication	0.00346 ( 8 of 2312 genes )	0.00097 ( 33 of 34011 annotated genes )	0.001213	1	Oas3, Oasl1, Dicer1, Tarbp2, Ccl5, Top2a, Inpp5k, Hbxip,
GO:0034968	histone lysine methylatio	0.00476 ( 11 of 2312 genes )	0.00168 ( 57 of 34011 annotated genes )	0.001234	1	Mll5, Suv420h1, Setd8, Ash2l, Mll1, Mll2, Dnmt3b, Whsc1, Dot1l, Mll3, Baz2a,
GO:0042787	protein ubiquitination in	0.00476 ( 11 of 2312 genes )	0.00168 ( 57 of 34011 annotated genes )	0.001234	1	Ubr5, Map3k1, Nedd4l, Disc1, Hectd1, Hectd2, Wwp2, Ube3c, Herc3, Os9, Rbbp6,
GO:0030900	forebrain development	0.01341 ( 31 of 2312 genes )	0.00762 ( 259 of 34011 annotated genes )	0.00124	1	Dixdc1, Creb1, Tacc3, Cdk5, Gsk3b, Fgfr1, Lhx3, Dclk1, Otx1, Atp7a, Slit2, Disc1, Reln, Frs2, Eomes, Dync2h1, Hes5, Pax6, Nfib, Erbb4, Hook3, Trp73, Dicer1, Tsc1, Aplp2, Zfp238, Lrp2, Mapk8ip3, Ntrk2, Ryk, Atrx,
GO:0032984	macromolecular complex di	0.00649 ( 15 of 2312 genes )	0.00273 ( 93 of 34011 annotated genes )	0.001258	1	Shroom2, Gas2l1, Sgk1, Smarce1, Nrg1, Kif5b, Smarcc1, Capza2, Mtrf1l, Clasp1, Aqp2, Etf1, Spna2, Tpm1, Evl,
GO:0010660	regulation of muscle cell	0.00303 ( 7 of 2312 genes )	0.00076 ( 26 of 34011 annotated genes )	0.00126	1	Hey2, Pde1a, Ilk, Agtr1a, Nrg1, Il12a, Rbm10,
GO:0030501	positive regulation of bo	0.00303 ( 7 of 2312 genes )	0.00076 ( 26 of 34011 annotated genes )	0.00126	1	Acvr1, Cd276, Bmpr1b, Fam20c, Fbn2, Osr2, Bmp7,
GO:0071496	cellular response to exte	0.00865 ( 20 of 2312 genes )	0.00418 ( 142 of 34011 annotated genes )	0.001265	1	Wac, Nbr1, Dspp, Wrn, Srebf1, Atg3, Ltk, Habp4, Aqp2, Slc39a4, Rptor, Aes, Gas2l1, Mll5, Adora2b, Cartpt, Ankrd1, Alb, Lyn, Stra8,
GO:0045596	negative regulation of ce	0.01946 ( 45 of 2312 genes )	0.01235 ( 420 of 34011 annotated genes )	0.001279	1	Apbb1, Pparg, Gsk3b, Frzb, Cdc73, Areg, Fzd7, Hes5, 2410016O06Rik, Pax6, Pglyrp3, Hdac4, Hmgb3, Med12, Itgb1, Ryk, Dixdc1, Mycn, Irx3, Nbr1, Fgfr1, Nipbl, Klf4, Ctla4, Eomes, Tgfbr1, Stag2, Prmt1, Tet1, Hook3, Gas2l1, Trp73, Dicer1, Suz12, Bmp7, Cartpt, Itgb3, Clec2g, Mib1, Lyn, Rbm15, Ltbp3, Sox11, Abcg1, Cd74,
GO:0030010	establishment of cell pol	0.00519 ( 12 of 2312 genes )	0.00194 ( 66 of 34011 annotated genes )	0.001303	1	Cyth1, Pard3, Gsk3b, Brsk2, Dock7, Fbf1, Amot, Fermt1, Krit1, Prkci, Jam3, Mark2,
GO:0051248	negative regulation of pr	0.01341 ( 31 of 2312 genes )	0.00764 ( 260 of 34011 annotated genes )	0.00132	1	Fmr1, Wac, Dedd, Nrg1, Cdk5, Kirrel, Igf2bp1, Serpine2, Slit2, Cpeb3, Ide, Fam129a, Eif2b4, Inpp5k, Gnb2l1, Cpeb2, Ptpn6, Bat3, Tsc1, Itgb3, Patl1, Furin, Cr1l, Grin2c, Lyn, Flna, Dnmt3b, St13, Usp44, Spink5, Ptpn3,
GO:0009895	negative regulation of ca	0.00562 ( 13 of 2312 genes )	0.00221 ( 75 of 34011 annotated genes )	0.001322	1	Wac, Dedd, Hdac4, Rasip1, Bat3, Nrg1, Serpine2, Furin, Grin2c, Flna, Ptpn3, Cpeb2, Usp44,
GO:0008016	regulation of heart contr	0.00692 ( 16 of 2312 genes )	0.00303 ( 103 of 34011 annotated genes )	0.001329	1	Srebf1, Jak2, Atp2a2, Casq2, Hdac4, Myl3, Scn10a, Fkbp1b, Adrbk1, Tnnt2, Ryr2, Hey2, Cacna1e, Tpm1, Mybpc3, Uts2,
GO:0010038	response to metal ion	0.00908 ( 21 of 2312 genes )	0.00450 ( 153 of 34011 annotated genes )	0.001353	1	Apobec1, Aanat, Ppp3ca, Pparg, Nedd4l, Atp7a, Camk2b, Kcnma1, Aqp2, Nfatc4, Asph, Aco1, Cnga3, Tat, Sord, Tnnt2, Ryr2, Aldob, Fabp4, Slc34a1, Plcg2,
GO:0051098	regulation of binding	0.01990 ( 46 of 2312 genes )	0.01273 ( 433 of 34011 annotated genes )	0.001354	1	Terf2ip, Traf2, Pparg, Prkcb, Nrg1, Cdk5, Gsk3b, Cald1, Foxp4, Fam72a, Krit1, Rsf1, Nfib, Hdac4, Runx1t1, Smad2, Traf3, Spag9, Peli1, Hsp90ab1, Flna, Prkci, Usp7, Pex14, Senp2, Rps3, Hr, Jmy, Nlrc5, Reln, Klf4, Jak2, Ikbkg, Glis2, Tgfbr1, Habp4, Aes, Rbck1, Aplp2, Gcg, Hipk3, Hmgn3, Fert2, Wwp2, Pon1, Cyld,
GO:0007179	transforming growth facto	0.00735 ( 17 of 2312 genes )	0.00332 ( 113 of 34011 annotated genes )	0.001372	1	Map3k1, Creb1, Htra3, Itga8, Fbn2, Tgfbr1, Ltbp1, Onecut2, Smad2, Col3a1, Npnt, Furin, Adamtsl2, Bmpr1b, Acvr1, Ltbp3, Usp9x,
GO:0050954	sensory perception of mec	0.00865 ( 20 of 2312 genes )	0.00420 ( 143 of 34011 annotated genes )	0.00138	1	Col11a1, Fgfr1, Serpine2, Nipbl, Otog, Col1a1, Rab3a, Sobp, Kcnma1, Gjb6, Myo6, Tmie, Col11a2, Htr7, Cdh23, Otoa, Ush1c, Bsnd, Mpv17, Mcoln3,
GO:0000377	RNA splicing, via transes	0.00606 ( 14 of 2312 genes )	0.00250 ( 85 of 34011 annotated genes )	0.001465	1	Rbm22, Bat1a, Wdr83, Mbnl1, Snrpa, Tra2b, Srrm1, Aqr, Snrpb2, Celf2, Txnl4b, Rbfox2, Srsf2ip, Ythdc1,
GO:0000398	nuclear mRNA splicing, vi	0.00606 ( 14 of 2312 genes )	0.00250 ( 85 of 34011 annotated genes )	0.001465	1	Rbm22, Bat1a, Wdr83, Mbnl1, Snrpa, Tra2b, Srrm1, Aqr, Snrpb2, Celf2, Txnl4b, Rbfox2, Srsf2ip, Ythdc1,
GO:0030041	actin filament polymeriza	0.00606 ( 14 of 2312 genes )	0.00250 ( 85 of 34011 annotated genes )	0.001465	1	Map3k1, Grb2, Kirrel, Jmy, Eln, Arpc2, Slit2, Diap2, Fert2, Arpc3, Capza2, Spna2, Tpm1, Evl,
GO:0090316	positive regulation of in	0.00606 ( 14 of 2312 genes )	0.00250 ( 85 of 34011 annotated genes )	0.001465	1	Ubr5, Rbm22, Tnfrsf1a, Tmem30b, Erbb4, Rbck1, Cdk5, Gsk3b, Jak2, Flna, Hsp90ab1, Rbpms, Hyal2, Tgfbr1,
GO:0001824	blastocyst development	0.00519 ( 12 of 2312 genes )	0.00197 ( 67 of 34011 annotated genes )	0.001492	1	Brca2, Tet1, Psmc3, Rbbp8, Taf8, Sp3, Xab2, G2e3, Eomes, Tgfbr1, Nasp, Gins1,
GO:0006405	RNA export from nucleus	0.00346 ( 8 of 2312 genes )	0.00100 ( 34 of 34011 annotated genes )	0.001494	1	Ncbp1, Bat1a, Nup160, Nup107, Tsc1, Rps28, Nxf1, Nup214,
GO:0070646	protein modification by s	0.00562 ( 13 of 2312 genes )	0.00223 ( 76 of 34011 annotated genes )	0.001498	1	Usp8, Usp37, 5430437P03Rik, Atxn7, Gps1, Usp42, Usp20, Cyld, Usp7, Usp44, Usp9x, Usp15, Senp2,
GO:0042306	regulation of protein imp	0.00735 ( 17 of 2312 genes )	0.00335 ( 114 of 34011 annotated genes )	0.001514	1	Tnfrsf1a, Tacc3, Cd36, Gsk3b, Fzd7, Jak2, Faf1, Hyal2, Tgfbr1, Ubr5, Erbb4, Rbck1, Flna, Hsp90ab1, Cyld, Rbpms, Fbxw11,
GO:0090257	regulation of muscle syst	0.00735 ( 17 of 2312 genes )	0.00335 ( 114 of 34011 annotated genes )	0.001514	1	Ppp3ca, Cald1, Klf4, Atp2a2, Kcnma1, Casq2, Myl3, Hdac4, Adora2b, Scn10a, Npnt, Fkbp1b, Adrbk1, Ryr1, Tnnt2, Tnnt3, Ryr2,
GO:0090329	regulation of DNA-depende	0.00260 ( 6 of 2312 genes )	0.00059 ( 20 of 34011 annotated genes )	0.001524	1	Ino80, Brca2, Clspn, Ciz1, Stra8, Stag2,
GO:0021953	central nervous system ne	0.00822 ( 19 of 2312 genes )	0.00394 ( 134 of 34011 annotated genes )	0.001524	1	Mycbp2, Kndc1, Cdk5, Fgfr1, Sox5, Lhx3, Dclk1, Atp7a, Tulp3, Slit2, Disc1, Eomes, Rgnef, Ighmbp2, Pax6, Nfib, Dicer1, Rora, Ntrk2,
GO:0006694	steroid biosynthetic proc	0.00779 ( 18 of 2312 genes )	0.00365 ( 124 of 34011 annotated genes )	0.001529	1	Hsd3b3, Srebf1, Cacna1h, Sc5d, Tm7sf2, Acbd3, Hsd17b3, Adora2b, Apob, Slc27a5, Hsd3b2, Dhcr7, Igfbp7, Hsd3b6, Hmgcs1, Bmpr1b, Hsd17b12, Abcg1,
GO:0045926	negative regulation of gr	0.01038 ( 24 of 2312 genes )	0.00547 ( 186 of 34011 annotated genes )	0.001533	1	Apbb1, Ptprj, Il7, Ing5, Pparg, Cd36, Inhba, Serpine2, Smarca2, Frzb, Slit2, Mpo, Pnpt1, Gnb2l1, Tro, Hyal2, Stk4, Gas2l1, Ip6k2, Apbb2, Ankrd26, Plac8, Ryk, Rbbp7,
GO:0015833	peptide transport	0.00952 ( 22 of 2312 genes )	0.00485 ( 165 of 34011 annotated genes )	0.001544	1	Dio2, Doc2b, Pclo, Ppp3ca, Slc18a2, Slc15a1, Srebf1, Slc9a3r1, Jak2, Cplx1, Smad2, Cartpt, Gcg, Fkbp1b, Hmgn3, Cacna1e, Anxa1, Myrip, Uts2, Pim3, Pfkfb2, Cd74,
GO:0002027	regulation of heart rate	0.00389 ( 9 of 2312 genes )	0.00123 ( 42 of 34011 annotated genes )	0.001565	1	Fkbp1b, Ryr2, Hey2, Srebf1, Cacna1e, Mybpc3, Tpm1, Casq2, Uts2,
GO:0010970	microtubule-based transpo	0.00389 ( 9 of 2312 genes )	0.00123 ( 42 of 34011 annotated genes )	0.001565	1	Arhgap21, Dst, Mapt, Ttc21b, Ift46, Kif5b, Arl3, Nefl, Pex14,
GO:0030705	cytoskeleton-dependent in	0.00389 ( 9 of 2312 genes )	0.00123 ( 42 of 34011 annotated genes )	0.001565	1	Arhgap21, Dst, Mapt, Ttc21b, Ift46, Kif5b, Arl3, Nefl, Pex14,
GO:0034109	homotypic cell-cell adhes	0.00389 ( 9 of 2312 genes )	0.00123 ( 42 of 34011 annotated genes )	0.001565	1	Megf11, Pdgfra, Serpine2, Ccl5, Itgb3, Bmp7, Ptpru, Itga2b, Lyn,
GO:0045055	regulated secretory pathw	0.00389 ( 9 of 2312 genes )	0.00123 ( 42 of 34011 annotated genes )	0.001565	1	Pi4k2a, Gm885, Adora2b, Rab27a, Cdk5, Vamp7, Abr, Lyn, Tac4,
GO:0006937	regulation of muscle cont	0.00649 ( 15 of 2312 genes )	0.00279 ( 95 of 34011 annotated genes )	0.001568	1	Myl3, Hdac4, Adora2b, Scn10a, Cald1, Fkbp1b, Npnt, Tnnt3, Adrbk1, Ryr1, Tnnt2, Ryr2, Atp2a2, Kcnma1, Casq2,
GO:0016486	peptide hormone processin	0.00216 ( 5 of 2312 genes )	0.00041 ( 14 of 34011 annotated genes )	0.001601	1	Corin, Pcsk1n, Furin, Pcsk1, Chst8,
GO:0043620	regulation of transcripti	0.00216 ( 5 of 2312 genes )	0.00041 ( 14 of 34011 annotated genes )	0.001601	1	Rgs14, Cd36, Chek1, Jmy, Arnt,
GO:0070169	positive regulation of bi	0.00303 ( 7 of 2312 genes )	0.00079 ( 27 of 34011 annotated genes )	0.001604	1	Acvr1, Cd276, Bmpr1b, Fam20c, Fbn2, Osr2, Bmp7,
GO:0022415	viral reproductive proces	0.00692 ( 16 of 2312 genes )	0.00309 ( 105 of 34011 annotated genes )	0.001634	1	Oas3, Map3k1, Bat1a, Oasl1, Tarbp2, Cul1, Top2a, Inpp5k, Rsf1, Hyal2, Etf1, Nlrx1, Dicer1, Ccl5, Vcam1, Hbxip,
GO:0000375	RNA splicing, via transes	0.00606 ( 14 of 2312 genes )	0.00253 ( 86 of 34011 annotated genes )	0.001644	1	Rbm22, Bat1a, Wdr83, Mbnl1, Snrpa, Tra2b, Srrm1, Aqr, Snrpb2, Celf2, Txnl4b, Rbfox2, Srsf2ip, Ythdc1,
GO:0048705	skeletal system morphogen	0.01038 ( 24 of 2312 genes )	0.00550 ( 187 of 34011 annotated genes )	0.00165	1	Mycn, Col11a1, Pdgfra, Mef2d, Col9a1, Tulp3, Nipbl, Gnas, Col1a1, Hoxb5, Hoxa3, Fbn2, Tgfbr1, Smad2, Dscaml1, Col11a2, Bmp7, Bmpr1b, Ltbp3, Osr2, Sox11, Sgpl1, Ryk, Alx4,
GO:0043392	negative regulation of DN	0.00779 ( 18 of 2312 genes )	0.00368 ( 125 of 34011 annotated genes )	0.001677	1	Rps3, Hr, Nlrc5, Klf4, Jak2, Glis2, Rsf1, Habp4, Hdac4, Nfib, Rbck1, Traf3, Peli1, Wwp2, Flna, Cyld, Pex14, Usp7,
GO:0009914	hormone transport	0.01081 ( 25 of 2312 genes )	0.00582 ( 198 of 34011 annotated genes )	0.001683	1	Dio2, Doc2b, Pclo, Creb1, Ppp3ca, Slc18a2, Inhba, Srebf1, Slc22a1, Jak2, Cplx1, Smad2, Cartpt, Gcg, Fkbp1b, Hmgn3, Cacna1e, Lyn, Anxa1, Sox11, Lrp2, Uts2, Pim3, Pfkfb2, Myrip,
GO:0030833	regulation of actin filam	0.00562 ( 13 of 2312 genes )	0.00226 ( 77 of 34011 annotated genes )	0.001694	1	Map3k1, Grb2, Kirrel, Jmy, Eln, Arpc2, Slit2, Fert2, Arpc3, Capza2, Spna2, Tpm1, Evl,
GO:0006402	mRNA catabolic process	0.00519 ( 12 of 2312 genes )	0.00200 ( 68 of 34011 annotated genes )	0.001704	1	Papd5, Ncbp1, Smg1, Lsm1, Dcp2, Patl1, Pnpt1, Xrn1, Exosc3, Etf1, Exosc5, Exosc9,
GO:0015931	nucleobase, nucleoside, n	0.00649 ( 15 of 2312 genes )	0.00282 ( 96 of 34011 annotated genes )	0.001745	1	Fmr1, Nup93, Ncbp1, Bat1a, Nup160, Qk, Nup107, Tsc1, Ahctf1, Nxf1, Rps28, Hnrnpa3, Lrpprc, Senp2, Nup214,
GO:0002263	cell activation involved	0.00822 ( 19 of 2312 genes )	0.00400 ( 136 of 34011 annotated genes )	0.001817	1	Il27, Pi4k2a, Gm885, Atp7a, Vamp7, Msh2, Abr, Eomes, Exosc3, Pglyrp3, Lgals8, Adora2b, Rab27a, Fert2, Tyrobp, Lyn, Tac4, Plcg2, Sema4a,
GO:0002366	leukocyte activation invo	0.00822 ( 19 of 2312 genes )	0.00400 ( 136 of 34011 annotated genes )	0.001817	1	Il27, Pi4k2a, Gm885, Atp7a, Vamp7, Msh2, Abr, Eomes, Exosc3, Pglyrp3, Lgals8, Adora2b, Rab27a, Fert2, Tyrobp, Lyn, Tac4, Plcg2, Sema4a,
GO:0007346	regulation of mitotic cel	0.01211 ( 28 of 2312 genes )	0.00682 ( 232 of 34011 annotated genes )	0.001833	1	Apbb1, Ino80, Pcid2, Brca2, Smc5, Csnk2a2, Afap1l2, Cul4b, Brd7, Cdc73, Top2a, Chfr, Eif4e, Ptpn6, Dbf4, Clspn, Trp73, Apbb2, Chek1, Kntc1, Rpl24, Bmp7, Cyld, Ptpn3, Usp44, Ppp2r5c, Pim3, Dmrt1,
GO:0030073	insulin secretion	0.00779 ( 18 of 2312 genes )	0.00370 ( 126 of 34011 annotated genes )	0.001837	1	Doc2b, Pclo, Ppp3ca, Slc18a2, Srebf1, Jak2, Cplx1, Smad2, Cartpt, Gcg, Fkbp1b, Hmgn3, Cacna1e, Anxa1, Myrip, Uts2, Pim3, Pfkfb2,
GO:0006413	translational initiation	0.00606 ( 14 of 2312 genes )	0.00256 ( 87 of 34011 annotated genes )	0.001841	1	Eif4e3, Lgtn, Fmr1, Ncbp1, Eif4a1, Eif3j, Eif4g2, Eif2b4, Eif3m, Eif4e1b, Rps6kb2, Eif1ax, Abcf1, Eif4e,
GO:0010564	regulation of cell cycle	0.01514 ( 35 of 2312 genes )	0.00914 ( 311 of 34011 annotated genes )	0.00185	1	Apbb1, Ino80, Pcid2, Brca2, Smc5, Chordc1, Csnk2a2, Ccdc52, Brd7, Cdc73, Top2a, Msh2, Chfr, Camk2b, Ptpn6, Dbf4, Clspn, 5430437P03Rik, Rpl24, Stra8, Taok1, Wac, Cul4b, Stag2, Rbbp8, Trp73, Apbb2, Kntc1, Chek1, Bmp7, Clock, Ppp2r5c, Usp44, Dmrt1, Rock2,
GO:0005975	carbohydrate metabolic pr	0.02465 ( 57 of 2312 genes )	0.01685 ( 573 of 34011 annotated genes )	0.00186	1	Chst2, Galnt2, Pck2, Pgls, Gdpd4, Glt6d1, Gsk3b, Lyve1, B3galt5, B4galt4, Pygm, St6galnac6, Otog, Impa1, Hs2st1, Galnt10, Chst8, Naga, Pglyrp3, Ext2, Hdac4, Dhdh, Ugp2, Gnpda2, Ppp1r1a, Sord, Shpk, Aldob, Gnptg, B4galt5, Pik3ca, Ppp1r3c, Pgp, Dhtkd1, Pfkfb2, Atp4b, Ganab, Slc4a10, Gfpt2, Dak, Slc2a4, Fktn, Ppp1cb, Inpp5k, Glb1l3, Hyal2, Man2b1, Habp4, G6pc3, Inpp4b, Ppp1r3b, St3gal1, Stt3a, Gpcpd…
GO:0007030	Golgi organization	0.00389 ( 9 of 2312 genes )	0.00126 ( 43 of 34011 annotated genes )	0.001864	1	Arhgap21, Bhlha15, Atl2, Cltc, Map2k2, Dync2h1, Vcpip1, Cog2, Plekhm2,
GO:0010171	body morphogenesis	0.00389 ( 9 of 2312 genes )	0.00126 ( 43 of 34011 annotated genes )	0.001864	1	Ift122, Asph, Pdgfra, Nipbl, Stra6, Cdk2ap1, Gnas, Col1a1, Sgpl1,
GO:0046879	hormone secretion	0.01038 ( 24 of 2312 genes )	0.00556 ( 189 of 34011 annotated genes )	0.001906	1	Dio2, Doc2b, Pclo, Creb1, Ppp3ca, Slc18a2, Inhba, Srebf1, Jak2, Cplx1, Smad2, Cartpt, Gcg, Fkbp1b, Hmgn3, Cacna1e, Lyn, Anxa1, Sox11, Lrp2, Uts2, Pim3, Pfkfb2, Myrip,
GO:0031935	regulation of chromatin s	0.00173 ( 4 of 2312 genes )	0.00026 ( 9 of 34011 annotated genes )	0.001915	1	Uty, Tet1, Apobec1, Phf8,
GO:0033235	positive regulation of pr	0.00173 ( 4 of 2312 genes )	0.00026 ( 9 of 34011 annotated genes )	0.001915	1	Hdac4, Pias1, Tollip, Arnt,
GO:0043206	fibril organization	0.00173 ( 4 of 2312 genes )	0.00026 ( 9 of 34011 annotated genes )	0.001915	1	Muc5ac, Col5a1, Ilk, Col3a1,
GO:0042060	wound healing	0.01168 ( 27 of 2312 genes )	0.00653 ( 222 of 34011 annotated genes )	0.001957	1	Ptprj, Proz, Map3k1, Pard3, Pdgfra, Gna13, Col5a1, Cd36, Nrg1, Serpine2, Ninj1, Fzd7, Itga2b, Otog, Macf1, Col1a1, Celsr1, Hps5, Evl, Fhad1, Erbb4, Rab27a, Col3a1, Itgb3, Lyn, Myh2, Tfpi,
GO:0071103	DNA conformation change	0.00779 ( 18 of 2312 genes )	0.00373 ( 127 of 34011 annotated genes )	0.002009	1	D6Mm5e, Ino80, Acin1, Ctcf, Wrn, Smarca2, Top2a, Top1, Mcm6, Ascc3, Rsf1, Smc4, Ncaph2, Smc2, Smarcc1, Hells, Stra8, Baz2a,
GO:0001539	ciliary or flagellar moti	0.00260 ( 6 of 2312 genes )	0.00062 ( 21 of 34011 annotated genes )	0.002013	1	Catsper4, Ift46, Catsper2, Ccdc135, Dnahc5, Catsper1,
GO:0048593	camera-type eye morphogen	0.00606 ( 14 of 2312 genes )	0.00259 ( 88 of 34011 annotated genes )	0.002057	1	Megf11, Ift122, Pax6, Shroom2, Cnga3, Gnat2, Dscam, Sp3, Bmp7, Stra6, Ahi1, Frs2, Sox11, Tspan12,
GO:0032387	negative regulation of in	0.00433 ( 10 of 2312 genes )	0.00153 ( 52 of 34011 annotated genes )	0.002086	1	Tacc3, Cd36, Cdk5, Gsk3b, Mapt, Bard1, Inpp5k, Faf1, Cyld, Fbxw11,
GO:0051259	protein oligomerization	0.01687 ( 39 of 2312 genes )	0.01058 ( 360 of 34011 annotated genes )	0.002123	1	Gchfr, Vasp, Traf2, Spast, Pam, Kcnc3, Ide, Shmt1, Pnpt1, Col1a1, Gnb2l1, Ilk, Ighmbp2, Atl1, Kcnma1, Grb2, Panx1, Tsc1, Spag9, Scara5, Gopc, St13, Pex14, Col6a1, Tnfrsf1a, Map3k1, Nbr1, Dhrs4, Hr, Evl, Slc1a1, Pdss1, Trp73, Ccl5, Kcnh6, Olfm1, Tnnt2, Atl2, Ccdc88c,
GO:0051168	nuclear export	0.00562 ( 13 of 2312 genes )	0.00232 ( 79 of 34011 annotated genes )	0.00215	1	Ncbp1, Bat1a, Nup160, Nup107, Cdk5, Gsk3b, Tsc1, Sdccag1, Bard1, Nxf1, Rps28, Ahcyl1, Nup214,
GO:0002009	morphogenesis of an epith	0.01730 ( 40 of 2312 genes )	0.01094 ( 372 of 34011 annotated genes )	0.002151	1	Ift122, Vasp, Spint1, Dll4, Ankrd6, Tulp3, Frzb, Jag2, Areg, Tead1, Ilk, Hs2st1, Stk4, Grb2, Agtr1a, Med12, Tsc1, Ift172, Ppp3r1, Gna13, Maged1, Fgfr1, Slit2, Hectd1, Frs2, Ctsh, Celsr1, Luzp1, Nfatc4, Bmp7, Npnt, Ahi1, Lias, Ryr2, Sema4c, Mib1, Rbm15, Acvr1, Sox11, Rock2,
GO:0045667	regulation of osteoblast	0.00692 ( 16 of 2312 genes )	0.00318 ( 108 of 34011 annotated genes )	0.0022	1	Nbr1, Pdlim7, Fgfr1, Gnas, Areg, Cd276, Ilk, Fam20c, Fbn2, 2410016O06Rik, Hdac4, Bmp7, Npnt, Bmpr1b, Acvr1, Sox11,
GO:0000084	S phase of mitotic cell c	0.00346 ( 8 of 2312 genes )	0.00106 ( 36 of 34011 annotated genes )	0.002211	1	Apbb1, Brca2, Dbf4, Apbb2, Cul4b, Cdc73, Tfdp1, Anp32b,
GO:0048008	platelet-derived growth f	0.00346 ( 8 of 2312 genes )	0.00106 ( 36 of 34011 annotated genes )	0.002211	1	Gab1, Ptprj, Pdgfra, Fert2, Slc9a3r1, Jak2, Rgs14, Sgpl1,
GO:0006349	regulation of gene expres	0.00216 ( 5 of 2312 genes )	0.00044 ( 15 of 34011 annotated genes )	0.00227	1	Airn, Ctcf, Dnmt3a, Gsk3b, Dnmt3b,
GO:0008334	histone mRNA metabolic pr	0.00216 ( 5 of 2312 genes )	0.00044 ( 15 of 34011 annotated genes )	0.00227	1	Papd5, Xrn1, Cpsf3, Lsm1, Dcp2,
GO:0042119	neutrophil activation	0.00216 ( 5 of 2312 genes )	0.00044 ( 15 of 34011 annotated genes )	0.00227	1	Vamp7, Tyrobp, Abr, Mll5, Ccl5,
GO:0001817	regulation of cytokine pr	0.01600 ( 37 of 2312 genes )	0.00994 ( 338 of 34011 annotated genes )	0.00227	1	Creb1, Traf2, Pparg, Trpm4, Map2k3, Cd276, Sema7a, Zfp287, Figf, Pglyrp3, Adora2b, Agtr1a, Panx1, Traf3, Peli1, Csf1r, Hc, Sulf2, Il27, Ltb, Tnfrsf1a, Cd36, Afap1l2, Klf4, Jak2, H2-Q1, Hyal2, Arnt, Akirin2, Il17a, Ccl5, Nlrp1a, Furin, Lyn, Il12a, Tbk1, Cd74,
GO:0006650	glycerophospholipid metab	0.00865 ( 20 of 2312 genes )	0.00438 ( 149 of 34011 annotated genes )	0.002274	1	Cdipt, Pi4k2a, Pip4k2c, Pikfyve, Pigc, Inpp5k, Pigx, Pik3c2g, Impa1, Sacm1l, Smg1, Ocrl, Ip6k2, Inpp4b, Pigk, Pign, Csf1r, Pon1, Pik3ca, Plcg2,
GO:0051346	negative regulation of hy	0.01514 ( 35 of 2312 genes )	0.00926 ( 315 of 34011 annotated genes )	0.002292	1	Pcid2, Gchfr, Lmtk3, Spint1, Serpine2, Birc6, Elfn2, Mug1, Sytl2, Kng2, Csrnp2, Sh3rf2, Serpina3b, Serpinb1c, Hbxip, Spink5, Tfpi, Spink10, Serpina1f, Spink13, Cast, Cd109, Klf4, Serpina3c, Cst8, Wnk1, Amot, Lepr, Pcsk1n, Fkbp15, Fkbp1b, Serpinb12, Tnnt2, Sh3rf1, Serpinf1,
GO:0021543	pallium development	0.00606 ( 14 of 2312 genes )	0.00262 ( 89 of 34011 annotated genes )	0.002294	1	Dixdc1, Pax6, Trp73, Dicer1, Tacc3, Cdk5, Gsk3b, Fgfr1, Tsc1, Slit2, Disc1, Zfp238, Reln, Ntrk2,
GO:0032388	positive regulation of in	0.00606 ( 14 of 2312 genes )	0.00262 ( 89 of 34011 annotated genes )	0.002294	1	Ubr5, Rbm22, Tnfrsf1a, Tmem30b, Erbb4, Rbck1, Cdk5, Gsk3b, Jak2, Flna, Hsp90ab1, Rbpms, Hyal2, Tgfbr1,
GO:0007268	synaptic transmission	0.01946 ( 45 of 2312 genes )	0.01273 ( 433 of 34011 annotated genes )	0.002327	1	Pclo, Slc18a2, Nrg1, Cdk5, Gsk3b, Serpine2, Gria4, Disc1, Kcnc3, Mink1, Sh3gl2, Rab3a, Camk2b, Cnr2, Arhgef15, Kcnma1, Ptprf, Dmd, Xbp1, Grm3, Rgs14, Ntrk2, Doc2b, Ppp3ca, Pcdhb16, Ap2b1, Apba2, Hnmt, Reln, Sv2a, Celsr1, Cplx1, Slc5a7, Nfatc4, Stx4a, Slc18a1, Pnoc, Myo6, Erbb4, Cartpt, Htr7, Agrn, Grin2c, Uts2, Lama2,
GO:0023057	negative regulation of si	0.02336 ( 54 of 2312 genes )	0.01594 ( 542 of 34011 annotated genes )	0.002328	1	Rgs9, Cilp, Erbb3, Pparg, Prkcb, Slc9a3r2, Gsk3b, Ankrd6, Atxn7, Serpine2, Tulp3, Frzb, Fam72a, Sox10, Camk2b, Scyl2, Cnr2, Rps6ka6, Ptprf, Stk4, Ptpn6, Onecut2, Med12, Tsc1, Gtf2h2, Adrbk1, Hey2, Gpc1, Adamtsl2, Rgs14, Sulf2, Dkk2, Ptprj, Rgs4, Arap3, Lect1, Slit2, Nlrc5, Klf4, Fktn, Slc9a3r1, Inpp5k, Htra3, Fbn2, Glis2, Ubr1, Hyal2, Aes, Bmp7, Ccl5, Acvr1, Lyn, Cyld, Cd74,
GO:0014706	striated muscle tissue de	0.01384 ( 32 of 2312 genes )	0.00826 ( 281 of 34011 annotated genes )	0.002344	1	Pdgfra, Dll4, Nrg1, Cdk5, Boc, Dok7, Ilk, Dmd, Myl3, Hdac4, Tsc1, Zfp238, Hey2, Itgb1, Mybpc3, Col11a1, Ppp3ca, Mbnl1, Fgfr1, Cacna1s, Erbb4, AW551984, Dicer1, Ankrd1, Eln, Agrn, Tnnt2, Ryr1, Ryr2, Acvr1, Tpm1, Chrnd,
GO:0006606	protein import into nucle	0.01038 ( 24 of 2312 genes )	0.00565 ( 192 of 34011 annotated genes )	0.002353	1	Tnfrsf1a, Ppp3r1, Ppp3ca, Tacc3, Cd36, Gsk3b, Kpna4, Rpain, Fzd7, Jak2, Faf1, Hyal2, Tgfbr1, Nup214, Ubr5, Rbm22, Erbb4, Nop58, Rbck1, Flna, Hsp90ab1, Rbpms, Cyld, Fbxw11,
GO:0051272	positive regulation of ce	0.01211 ( 28 of 2312 genes )	0.00694 ( 236 of 34011 annotated genes )	0.002357	1	Ptprj, Pdgfra, Itga2b, Map2k2, Col1a1, Gnb2l1, Amot, Ctsh, Jak2, Ilk, Tgfbr1, Figf, Erbb4, Onecut2, Lpar1, Itgb3, Ccl5, Spag9, Fert2, Plcg1, Furin, Csf1r, Sun2, Lyn, Itgb1, Syne2, Cd74, Uts2,
GO:0000075	cell cycle checkpoint	0.00779 ( 18 of 2312 genes )	0.00379 ( 129 of 34011 annotated genes )	0.002394	1	Pcid2, Wac, Csnk2a2, Top2a, Msh2, Chfr, Clspn, Rbbp8, Trp73, 5430437P03Rik, Kntc1, Chek1, Rpl24, Clock, Stra8, Ppp2r5c, Usp44, Taok1,
GO:0070507	regulation of microtubule	0.00562 ( 13 of 2312 genes )	0.00235 ( 80 of 34011 annotated genes )	0.002413	1	Dixdc1, Ska1, Gas2l1, Sgk1, Chordc1, Chek1, Dst, Mapt, Ccdc52, Clip3, Cyld, Clasp1, Rock2,
GO:0030111	regulation of Wnt recepto	0.00952 ( 22 of 2312 genes )	0.00503 ( 171 of 34011 annotated genes )	0.002438	1	Dixdc1, Rspo1, Trpm4, Ankrd6, Frzb, Disc1, Cdc73, Macf1, Col1a1, Sox10, Scyl2, Tnks2, Ilk, Als2cr4, Stk4, Ubr5, Aes, Ccny, Med12, Sulf2, Cyld, Dkk2,
GO:0002790	peptide secretion	0.00865 ( 20 of 2312 genes )	0.00441 ( 150 of 34011 annotated genes )	0.002462	1	Dio2, Doc2b, Pclo, Ppp3ca, Slc18a2, Srebf1, Jak2, Cplx1, Smad2, Cartpt, Gcg, Fkbp1b, Hmgn3, Cacna1e, Anxa1, Myrip, Uts2, Pim3, Pfkfb2, Cd74,
GO:0010639	negative regulation of or	0.00865 ( 20 of 2312 genes )	0.00441 ( 150 of 34011 annotated genes )	0.002462	1	Terf2ip, Pcid2, Map3k1, Apobec1, Slit2, Clip3, Inpp5k, Capza2, Evl, Shroom2, Tet1, Gas2l1, Sgk1, Chek1, Bmp7, Dnmt3b, Clasp1, Tpm1, Spna2, Usp44,
GO:0043624	cellular protein complex	0.00519 ( 12 of 2312 genes )	0.00209 ( 71 of 34011 annotated genes )	0.002489	1	Shroom2, Gas2l1, Sgk1, Nrg1, Capza2, Mtrf1l, Aqp2, Etf1, Spna2, Tpm1, Clasp1, Evl,
GO:0051605	protein maturation by pep	0.00476 ( 11 of 2312 genes )	0.00182 ( 62 of 34011 annotated genes )	0.002502	1	5033414D02Rik, Pcsk1n, Prss12, Pcsk1, Serpine2, Corin, Cr1l, Furin, Ctsh, C6, Chst8,
GO:0017038	protein import	0.01211 ( 28 of 2312 genes )	0.00697 ( 237 of 34011 annotated genes )	0.002506	1	Tnfrsf1a, Ppp3r1, Ppp3ca, Tacc3, Cd36, Gsk3b, Kpna4, Rpain, Fzd7, Tomm40, Jak2, Faf1, Hyal2, Pex26, Tgfbr1, Nup214, Ubr5, Rbm22, Erbb4, Nop58, Rbck1, Flna, Hsp90ab1, Rbpms, Cyld, Lrp2, Fbxw11, Pex14,
GO:0016574	histone ubiquitination	0.00303 ( 7 of 2312 genes )	0.00085 ( 29 of 34011 annotated genes )	0.002506	1	Wac, Skp1a, Cbx8, Ube2a, Suz12, Pcgf1, Cdc73,
GO:0061098	positive regulation of pr	0.00303 ( 7 of 2312 genes )	0.00085 ( 29 of 34011 annotated genes )	0.002506	1	Reln, Csf1r, Erbb3, Dok7, Nrg1, Afap1l2, Ccl5,
GO:0042692	muscle cell differentiati	0.01298 ( 30 of 2312 genes )	0.00764 ( 260 of 34011 annotated genes )	0.002583	1	Pdgfra, Ppp3ca, Pias1, Neb, Nrg1, Boc, Gsk3b, Mbnl1, Cacna1s, Dok7, Pbrm1, Ilk, Dmd, Nfatc4, Hdac4, Bnip2, Dicer1, AW551984, Qk, Tsc1, Agrn, Spag9, Tnnt2, Ryr1, Hey2, Sema4c, Acvr1, Itgb1, Mybpc3, Tpm1,
GO:0042278	purine nucleoside metabol	0.00389 ( 9 of 2312 genes )	0.00132 ( 45 of 34011 annotated genes )	0.002597	1	Ocln, AI314976, Aprt, Pank1, Ppcdc, Dnmt3a, Nt5c3, Dnmt3b, Pcmt1,
GO:0048814	regulation of dendrite mo	0.00389 ( 9 of 2312 genes )	0.00132 ( 45 of 34011 annotated genes )	0.002597	1	Kndc1, Sgk1, Cdk5, Gsk3b, Reln, Ilk, Camk2b, Ptprd, Ptprf,
GO:0010165	response to X-ray	0.00260 ( 6 of 2312 genes )	0.00065 ( 22 of 34011 annotated genes )	0.002613	1	Brca2, Ercc6, Msh2, Trp73, Lrp2, Nipbl,
GO:0042992	negative regulation of tr	0.00260 ( 6 of 2312 genes )	0.00065 ( 22 of 34011 annotated genes )	0.002613	1	Faf1, Tacc3, Cd36, Gsk3b, Cyld, Fbxw11,
GO:0071514	genetic imprinting	0.00260 ( 6 of 2312 genes )	0.00065 ( 22 of 34011 annotated genes )	0.002613	1	Gnas, Airn, Ctcf, Dnmt3a, Gsk3b, Dnmt3b,
GO:0043434	response to peptide hormo	0.00952 ( 22 of 2312 genes )	0.00506 ( 172 of 34011 annotated genes )	0.002623	1	Aanat, Pparg, Prkcb, Ghr, Eif2b4, Slc2a4, Serpina3c, Srebf1, Inpp5k, Jak2, Atp2a2, Ptprf, Pxn, Sgk1, Grb2, Tsc1, Fert2, Aldob, Smarcc1, Retn, Hadha, Prkci,
GO:0001754	eye photoreceptor cell di	0.00346 ( 8 of 2312 genes )	0.00109 ( 37 of 34011 annotated genes )	0.002657	1	Pax6, Cnga3, Gnat2, Rorb, Prkci, Ntrk2, Tulp1, Olfm3,
GO:0002028	regulation of sodium ion	0.00346 ( 8 of 2312 genes )	0.00109 ( 37 of 34011 annotated genes )	0.002657	1	Prss8, Sgk1, Nedd4l, Serpine2, Gnas, Slc9a3r1, Slc9a3, Ahcyl1,
GO:0010216	maintenance of DNA methyl	0.00130 ( 3 of 2312 genes )	0.00015 ( 5 of 34011 annotated genes )	0.002698	1	Hells, Ctcf, Dnmt3a,
GO:0010766	negative regulation of so	0.00130 ( 3 of 2312 genes )	0.00015 ( 5 of 34011 annotated genes )	0.002698	1	Slc9a3r1, Nedd4l, Serpine2,
GO:0031936	negative regulation of ch	0.00130 ( 3 of 2312 genes )	0.00015 ( 5 of 34011 annotated genes )	0.002698	1	Tet1, Apobec1, Phf8,
GO:0051146	striated muscle cell diff	0.01038 ( 24 of 2312 genes )	0.00570 ( 194 of 34011 annotated genes )	0.002698	1	Pdgfra, Ppp3ca, Neb, Nrg1, Boc, Gsk3b, Cacna1s, Dok7, Ilk, Dmd, Hdac4, Bnip2, AW551984, Dicer1, Tsc1, Agrn, Spag9, Ryr1, Tnnt2, Hey2, Acvr1, Itgb1, Mybpc3, Tpm1,
GO:0051170	nuclear import	0.01038 ( 24 of 2312 genes )	0.00570 ( 194 of 34011 annotated genes )	0.002698	1	Tnfrsf1a, Ppp3r1, Ppp3ca, Tacc3, Cd36, Gsk3b, Kpna4, Rpain, Fzd7, Jak2, Faf1, Hyal2, Tgfbr1, Nup214, Ubr5, Rbm22, Erbb4, Nop58, Rbck1, Flna, Hsp90ab1, Rbpms, Cyld, Fbxw11,
GO:0010648	negative regulation of ce	0.02336 ( 54 of 2312 genes )	0.01605 ( 546 of 34011 annotated genes )	0.00272	1	Rgs9, Cilp, Erbb3, Pparg, Prkcb, Slc9a3r2, Gsk3b, Ankrd6, Atxn7, Serpine2, Tulp3, Frzb, Fam72a, Sox10, Camk2b, Scyl2, Cnr2, Rps6ka6, Ptprf, Stk4, Ptpn6, Onecut2, Med12, Tsc1, Gtf2h2, Adrbk1, Hey2, Gpc1, Adamtsl2, Rgs14, Sulf2, Dkk2, Ptprj, Rgs4, Arap3, Lect1, Slit2, Nlrc5, Klf4, Fktn, Slc9a3r1, Inpp5k, Htra3, Fbn2, Glis2, Ubr1, Hyal2, Aes, Bmp7, Ccl5, Acvr1, Lyn, Cyld, Cd74,
GO:0009408	response to heat	0.00433 ( 10 of 2312 genes )	0.00159 ( 54 of 34011 annotated genes )	0.002795	1	Crnn, Mill2, Clpb, Dnaja2, Trpv2, Dhx9, Arpp21, Eif2b4, Scara5, Rbbp7,
GO:0060048	cardiac muscle contractio	0.00433 ( 10 of 2312 genes )	0.00159 ( 54 of 34011 annotated genes )	0.002795	1	Myl3, Hdac4, Scn10a, Map2k3, Fkbp1b, Adrbk1, Ryr2, Mybpc3, Tpm1, Casq2,
GO:0007610	behavior	0.02336 ( 54 of 2312 genes )	0.01608 ( 547 of 34011 annotated genes )	0.002826	1	Apbb1, Pdgfra, Slc18a2, Nrg1, Cdk5, Serpine2, Stra6, Gnas, Otog, Sobp, Cnr2, Mchr1, Kcnma1, Figf, Scn9a, Sgk1, Agtr1a, Mapt, Ankrd26, Rgs14, Hc, Ntrk2, Jam3, Ryk, Strbp, Mcoln3, Ptprj, Etv1, Lgi4, Scg2, Dscam, Atp7a, Apba2, Slit2, Reln, Celsr1, Lepr, Itga8, Man2b1, Myo6, Lpar1, Aplp2, Cartpt, Ccl5, Htr7, Ahi1, Cdh23, Aprt, Alb, Cacna1e, Lyn, Serpinf1, Uts2, Cd74,
GO:0016197	endosome transport	0.00606 ( 14 of 2312 genes )	0.00268 ( 91 of 34011 annotated genes )	0.002835	1	Vps36, Hook3, Arl4c, Vps4a, Pikfyve, Erc1, Spag9, D6Wsu116e, Stx5a, Vamp7, Scyl2, 2310035K24Rik, Flna, Lrp2,
GO:0031668	cellular response to extr	0.00779 ( 18 of 2312 genes )	0.00385 ( 131 of 34011 annotated genes )	0.00284	1	Wac, Nbr1, Dspp, Wrn, Srebf1, Atg3, Ltk, Aqp2, Slc39a4, Rptor, Aes, Gas2l1, Mll5, Adora2b, Cartpt, Alb, Lyn, Stra8,
GO:0019058	viral infectious cycle	0.00476 ( 11 of 2312 genes )	0.00185 ( 63 of 34011 annotated genes )	0.002851	1	Oas3, Map3k1, Oasl1, Dicer1, Tarbp2, Ccl5, Top2a, Inpp5k, Hbxip, Rsf1, Hyal2,
GO:0000910	cytokinesis	0.00562 ( 13 of 2312 genes )	0.00241 ( 82 of 34011 annotated genes )	0.003017	1	Usp8, Son, Brca2, Bin3, Vps4a, Spast, Ahctf1, Birc6, Cntrob, Arl3, Incenp, Prc1, Rock2,
GO:0009266	response to temperature s	0.00562 ( 13 of 2312 genes )	0.00241 ( 82 of 34011 annotated genes )	0.003017	1	Dio2, Crnn, Pcsk1n, Mill2, Clpb, Dnaja2, Trpv2, Dhx9, Arpp21, Eif2b4, Scara5, Plac8, Rbbp7,
GO:0046498	S-adenosylhomocysteine me	0.00173 ( 4 of 2312 genes )	0.00029 ( 10 of 34011 annotated genes )	0.003023	1	Ocln, Dnmt3a, Dnmt3b, Pcmt1,
GO:0061029	eyelid development in cam	0.00173 ( 4 of 2312 genes )	0.00029 ( 10 of 34011 annotated genes )	0.003023	1	Inhba, Osr2, Sox11, Stra6,
GO:0071044	histone mRNA catabolic pr	0.00173 ( 4 of 2312 genes )	0.00029 ( 10 of 34011 annotated genes )	0.003023	1	Papd5, Xrn1, Lsm1, Dcp2,
GO:2000147	positive regulation of ce	0.01168 ( 27 of 2312 genes )	0.00673 ( 229 of 34011 annotated genes )	0.003042	1	Ptprj, Pdgfra, Itga2b, Map2k2, Col1a1, Gnb2l1, Amot, Ctsh, Jak2, Ilk, Figf, Erbb4, Onecut2, Lpar1, Itgb3, Ccl5, Spag9, Fert2, Plcg1, Furin, Csf1r, Sun2, Lyn, Itgb1, Syne2, Cd74, Uts2,
GO:0006906	vesicle fusion	0.00303 ( 7 of 2312 genes )	0.00088 ( 30 of 34011 annotated genes )	0.003083	1	Stx5a, Doc2b, Vamp7, 5730419I09Rik, Rab3a, Anxa1, Eea1,
GO:0045069	regulation of viral genom	0.00303 ( 7 of 2312 genes )	0.00088 ( 30 of 34011 annotated genes )	0.003083	1	Oas3, Top2a, Inpp5k, Oasl1, Dicer1, Tarbp2, Ccl5,
GO:0060325	face morphogenesis	0.00303 ( 7 of 2312 genes )	0.00088 ( 30 of 34011 annotated genes )	0.003083	1	Asph, Cdk2ap1, Col1a1, Pdgfra, Nipbl, Sgpl1, Stra6,
GO:0043299	leukocyte degranulation	0.00346 ( 8 of 2312 genes )	0.00112 ( 38 of 34011 annotated genes )	0.003172	1	Pi4k2a, Gm885, Adora2b, Rab27a, Vamp7, Abr, Lyn, Tac4,
GO:0071345	cellular response to cyto	0.01211 ( 28 of 2312 genes )	0.00709 ( 241 of 34011 annotated genes )	0.003185	1	Duox1, Tnfrsf1a, Traf2, Pparg, Ptprn, Slit2, Ghr, Nlrc5, Pnpt1, Inpp5k, Jak2, Lepr, Hyal2, Ptprf, Gab1, Ptpn6, Il1r1, Cxcr6, Jak1, Ankrd1, Il17a, Ccl5, Npnt, Traf3, Fert2, Lifr, Csf1r, Cd74,
GO:0031098	stress-activated protein	0.00908 ( 21 of 2312 genes )	0.00482 ( 164 of 34011 annotated genes )	0.003193	1	Dixdc1, Ercc6, Map3k1, Nbr1, Map4k4, Traf2, Mink1, Fktn, Map2k2, Zfp622, Gab1, Map3k5, Trp73, Hipk3, Spag9, Sema4c, Sh3rf1, Lyn, Mapk8ip3, Magi3, Taok1,
GO:0001890	placenta development	0.00692 ( 16 of 2312 genes )	0.00329 ( 112 of 34011 annotated genes )	0.0032	1	Dedd, Pparg, Spint1, Sp3, Birc6, Eomes, Pbrm1, Stk4, Arnt, Gab1, Grb2, Vcam1, Hey2, Rbm15, Hsp90ab1, Tcfeb,
GO:0021954	central nervous system ne	0.00433 ( 10 of 2312 genes )	0.00162 ( 55 of 34011 annotated genes )	0.003214	1	Nfib, Mycbp2, Cdk5, Fgfr1, Dclk1, Atp7a, Slit2, Disc1, Rgnef, Ntrk2,
GO:0016579	protein deubiquitination	0.00476 ( 11 of 2312 genes )	0.00188 ( 64 of 34011 annotated genes )	0.003239	1	Usp8, Usp37, 5430437P03Rik, Atxn7, Usp42, Usp20, Cyld, Usp7, Usp44, Usp9x, Usp15,
GO:0001819	positive regulation of cy	0.00952 ( 22 of 2312 genes )	0.00515 ( 175 of 34011 annotated genes )	0.003251	1	Tnfrsf1a, Creb1, Traf2, Cd36, Afap1l2, Jak2, Sema7a, Akirin2, Arnt, Figf, Adora2b, Panx1, Il17a, Ccl5, Peli1, Nlrp1a, Csf1r, Hc, Il12a, Sulf2, Tbk1, Cd74,
GO:0009416	response to light stimulu	0.00952 ( 22 of 2312 genes )	0.00515 ( 175 of 34011 annotated genes )	0.003251	1	Apbb1, Rad18, Ino80, Brca2, Ercc6, Cdk5, Wrn, Gnb1, Rpain, Msh2, Cacna1f, Hyal2, Tulp1, Nfatc4, Gnat2, Sgk1, Trp73, Ube2a, Chek1, Cacna1e, Rgs14, Il12a,
GO:0019221	cytokine-mediated signali	0.00952 ( 22 of 2312 genes )	0.00515 ( 175 of 34011 annotated genes )	0.003251	1	Duox1, Tnfrsf1a, Traf2, Pparg, Ptprn, Slit2, Ghr, Nlrc5, Jak2, Lepr, Ptprf, Gab1, Ptpn6, Il1r1, Cxcr6, Ccl5, Jak1, Traf3, Fert2, Lifr, Csf1r, Cd74,
GO:0007517	muscle organ development	0.01384 ( 32 of 2312 genes )	0.00844 ( 287 of 34011 annotated genes )	0.003254	1	Dll4, Nrg1, Cdk5, Boc, Stra6, Dok7, Ilk, Unc45a, Dmd, Myl3, Hdac4, Mov10l1, Zfp238, Hey2, Mybpc3, Alx4, Etv1, Col11a1, Ppp3ca, Mbnl1, Fgfr1, Cacna1s, Erbb4, Col3a1, Ankrd1, Eln, Agrn, Tnnt2, Ryr1, Ryr2, Tpm1, Chrnd,
GO:0048015	phosphatidylinositol-medi	0.00260 ( 6 of 2312 genes )	0.00068 ( 23 of 34011 annotated genes )	0.003338	1	Csf1r, Pdgfra, Pik3ca, Plch1, Pik3c2g, Car8,
GO:0018108	peptidyl-tyrosine phospho	0.00952 ( 22 of 2312 genes )	0.00517 ( 176 of 34011 annotated genes )	0.003486	1	Tnfrsf1a, Pdgfra, Cd36, Fgfr1, Ghr, Reln, Jak2, Hes5, Ptpn6, Pxn, Erbb4, Agtr1a, Itgb3, Ccl5, Jak1, Fert2, Csf1r, Clk3, Lyn, Itgb1, Il12a, Cd74,
GO:0018212	peptidyl-tyrosine modific	0.00952 ( 22 of 2312 genes )	0.00517 ( 176 of 34011 annotated genes )	0.003486	1	Tnfrsf1a, Pdgfra, Cd36, Fgfr1, Ghr, Reln, Jak2, Hes5, Ptpn6, Pxn, Erbb4, Agtr1a, Itgb3, Ccl5, Jak1, Fert2, Csf1r, Clk3, Lyn, Itgb1, Il12a, Cd74,
GO:0002521	leukocyte differentiation	0.01557 ( 36 of 2312 genes )	0.00985 ( 335 of 34011 annotated genes )	0.003499	1	Pcid2, Il7, Pparg, Sp3, Jag2, Gnas, Mink1, Fzd7, Msh2, Ptpn6, Ncaph2, Pglyrp3, Mll5, Lgals8, Hmgb3, Csf1r, Hells, Anxa1, Sema4a, Il27, B2m, H2-DMa, Atp7a, Gmpr2, Ctla4, Eomes, Il17a, Cartpt, Itgb3, Ccl5, Clec2g, Gab3, Csf3, Lyn, Plcg2, Cd74,
GO:0016485	protein processing	0.00692 ( 16 of 2312 genes )	0.00332 ( 113 of 34011 annotated genes )	0.003501	1	Ift172, Prss12, Pcsk1, Vps35, Serpine2, Ctsh, Dync2h1, Chst8, 5033414D02Rik, Pcsk1n, Aph1c, Corin, Ctse, Cr1l, Furin, C6,
GO:0050866	negative regulation of ce	0.00692 ( 16 of 2312 genes )	0.00332 ( 113 of 34011 annotated genes )	0.003501	1	Ptpn6, Vtcn1, Gm885, Pglyrp3, Hmgb3, Pdgfra, Serpine2, Fert2, Peli1, Ctla4, Abr, Cd276, Lyn, Sox11, Cnr2, Cd74,
GO:0030072	peptide hormone secretion	0.00822 ( 19 of 2312 genes )	0.00423 ( 144 of 34011 annotated genes )	0.003502	1	Dio2, Doc2b, Pclo, Ppp3ca, Slc18a2, Srebf1, Jak2, Cplx1, Smad2, Cartpt, Gcg, Fkbp1b, Hmgn3, Cacna1e, Anxa1, Myrip, Uts2, Pim3, Pfkfb2,
GO:0035107	appendage morphogenesis	0.00822 ( 19 of 2312 genes )	0.00423 ( 144 of 34011 annotated genes )	0.003502	1	Ift122, Mycn, Tmem107, Aff3, Fgfr1, Atp7a, Tulp3, Nipbl, Gnas, Dync2h1, Fbn2, Asph, Dicer1, Bmp7, Fbxw4, Bmpr1b, Osr2, Sox11, Alx4,
GO:0035108	limb morphogenesis	0.00822 ( 19 of 2312 genes )	0.00423 ( 144 of 34011 annotated genes )	0.003502	1	Ift122, Mycn, Tmem107, Aff3, Fgfr1, Atp7a, Tulp3, Nipbl, Gnas, Dync2h1, Fbn2, Asph, Dicer1, Bmp7, Fbxw4, Bmpr1b, Osr2, Sox11, Alx4,
GO:0019637	organophosphate metabolic	0.01254 ( 29 of 2312 genes )	0.00747 ( 254 of 34011 annotated genes )	0.003508	1	Cdipt, Pi4k2a, Pla2g4d, Pip4k2c, Pla2g4f, Pikfyve, Smpdl3a, Pigc, Ept1, Inpp5k, Oc90, Pik3c2g, Pigx, Impa1, Sacm1l, Ocrl, Aspg, Smg1, Ip6k2, Inpp4b, Plcg1, Pigk, Pign, Csf1r, Plcb3, Pik3ca, Pon1, Plcg2, Gnpat,
GO:0051052	regulation of DNA metabol	0.00995 ( 23 of 2312 genes )	0.00550 ( 187 of 34011 annotated genes )	0.003513	1	Terf2ip, Apbb1, Rad18, Ino80, Rps3, Brca2, Pdgfra, Gsk3b, Areg, Msh2, Ciz1, Dna2, Dnmt3a, Stag2, Clspn, Chek1, 5430437P03Rik, Ankrd1, Pds5a, Pik3ca, Pcna, Stra8, Ccdc88a,
GO:0044262	cellular carbohydrate met	0.01946 ( 45 of 2312 genes )	0.01303 ( 443 of 34011 annotated genes )	0.003577	1	Chst2, Galnt2, Pck2, Pgls, Gdpd4, Gsk3b, B3galt5, Pygm, St6galnac6, Otog, Impa1, Hs2st1, Galnt10, Naga, Ext2, Hdac4, Dhdh, Ugp2, Gnpda2, Ppp1r1a, Sord, Gnptg, Aldob, Pik3ca, Ppp1r3c, Dhtkd1, Pfkfb2, Atp4b, Ganab, Slc4a10, Dak, Slc2a4, Fktn, Ppp1cb, Inpp5k, Man2b1, G6pc3, Inpp4b, Ppp1r3b, St3gal1, Stt3a, Gpcpd1, Pofut2, Alg6, Pdhb,
GO:0001816	cytokine production	0.01730 ( 40 of 2312 genes )	0.01126 ( 383 of 34011 annotated genes )	0.003599	1	Creb1, Traf2, Pparg, Trpm4, Map2k3, Cd276, Sema7a, Zfp287, Figf, Pglyrp3, Adora2b, Agtr1a, Panx1, Traf3, Peli1, Csf1r, Fabp4, Hc, Sulf2, Il27, Ltb, Vtcn1, Tnfrsf1a, Cd36, Afap1l2, Klf4, Jak2, Eomes, H2-Q1, Hyal2, Arnt, Akirin2, Il17a, Ccl5, Nlrp1a, Furin, Lyn, Il12a, Tbk1, Cd74,
GO:0007062	sister chromatid cohesion	0.00303 ( 7 of 2312 genes )	0.00091 ( 31 of 34011 annotated genes )	0.003755	1	Smc5, Stra8, Smc2, Stag2, Smc4, Nipbl, Pogz,
GO:0046854	phosphatidylinositol phos	0.00303 ( 7 of 2312 genes )	0.00091 ( 31 of 34011 annotated genes )	0.003755	1	Pi4k2a, Smg1, Inpp5k, Ip6k2, Pik3ca, Pik3c2g, Pikfyve,
GO:0042531	positive regulation of ty	0.00346 ( 8 of 2312 genes )	0.00115 ( 39 of 34011 annotated genes )	0.00376	1	Tnfrsf1a, Erbb4, Ccl5, Csf1r, Jak2, Lyn, Il12a, Hes5,
GO:0042445	hormone metabolic process	0.00822 ( 19 of 2312 genes )	0.00426 ( 145 of 34011 annotated genes )	0.003783	1	Dio2, Aanat, Pdgfra, Pcsk1, Ide, Reln, Cacna1h, Kcnma1, Chst8, Arnt, Pcsk1n, Dhrs9, Corin, Furin, Hsd11b2, Hsd3b6, Bmpr1b, Sgpl1, Kcnj6,
GO:0007259	JAK-STAT cascade	0.00606 ( 14 of 2312 genes )	0.00276 ( 94 of 34011 annotated genes )	0.003838	1	Tnfrsf1a, Erbb4, Pias1, Agtr1a, Cdk5, Ccl5, Ghr, Fert2, Csf1r, Jak2, Lyn, Il12a, Dot1l, Hes5,
GO:0042254	ribosome biogenesis	0.00865 ( 20 of 2312 genes )	0.00459 ( 156 of 34011 annotated genes )	0.003889	1	Rpf1, Tfb2m, Rpl5, Rps28, Rrn3, Isg20, Exosc3, Exosc5, 2410016O06Rik, Rplp0, Nop58, Tsc1, Rpl24, Rcl1, Gnl2, Exosc8, Utp14a, Utp6, Nol9, Exosc9,
GO:0001763	morphogenesis of a branch	0.01038 ( 24 of 2312 genes )	0.00588 ( 200 of 34011 annotated genes )	0.004001	1	Mycn, Ppp3r1, Maged1, Gna13, Spint1, Rasip1, Dll4, Fgfr1, Slit2, Frs2, Areg, Celsr1, Ctsh, Ilk, Stk4, Nfatc4, Pxn, Dicer1, Agtr1a, Grb2, Bmp7, Npnt, Acvr1, Rbm15,
GO:0007601	visual perception	0.00735 ( 17 of 2312 genes )	0.00368 ( 125 of 34011 annotated genes )	0.004073	1	Rgs9, Ercc6, Col11a1, Rp1l1, Cnga3, Gnat2, Pde6h, Abca4, Sag, Cdh23, Cngb3, Ush1c, Col1a1, Rorb, Myo3b, Cacna1f, Tulp1,
GO:0050953	sensory perception of lig	0.00735 ( 17 of 2312 genes )	0.00368 ( 125 of 34011 annotated genes )	0.004073	1	Rgs9, Ercc6, Col11a1, Rp1l1, Cnga3, Gnat2, Pde6h, Abca4, Sag, Cdh23, Cngb3, Ush1c, Col1a1, Rorb, Myo3b, Cacna1f, Tulp1,
GO:0090317	negative regulation of in	0.00389 ( 9 of 2312 genes )	0.00141 ( 48 of 34011 annotated genes )	0.004104	1	Tacc3, Cd36, Cdk5, Gsk3b, Bard1, Inpp5k, Faf1, Cyld, Fbxw11,
GO:0043270	positive regulation of io	0.00562 ( 13 of 2312 genes )	0.00250 ( 85 of 34011 annotated genes )	0.004151	1	Asph, Prss8, Sgk1, Trpv2, Nedd4l, Dpp6, Gcg, Ccl5, Gnas, Mchr1, Aqp2, Plcg2, Ahcyl1,
GO:0070372	regulation of ERK1 and ER	0.00692 ( 16 of 2312 genes )	0.00338 ( 115 of 34011 annotated genes )	0.004175	1	Ptpn6, Erbb4, Pdgfra, Gcg, Itgb3, Fgf21, Npnt, Klf4, Csf1r, Slc9a3r1, Ros1, Rgs14, Lyn, Sema7a, Rps6ka6, Cd74,
GO:0006826	iron ion transport	0.00260 ( 6 of 2312 genes )	0.00071 ( 24 of 34011 annotated genes )	0.004202	1	Slc39a14, Slc25a37, Scara5, Cltc, Hsd3b6, Fth1,
GO:0007090	regulation of S phase of	0.00260 ( 6 of 2312 genes )	0.00071 ( 24 of 34011 annotated genes )	0.004202	1	Apbb1, Brca2, Dbf4, Apbb2, Cul4b, Cdc73,
GO:0045494	photoreceptor cell mainte	0.00260 ( 6 of 2312 genes )	0.00071 ( 24 of 34011 annotated genes )	0.004202	1	Cdh23, Ercc6, Ush1c, Rp1l1, Abca4, Tulp1,
GO:0009566	fertilization	0.00606 ( 14 of 2312 genes )	0.00279 ( 95 of 34011 annotated genes )	0.004231	1	Zp1, Zp3r, Atp1a4, Apob, Cast, Clgn, Cacna1h, Catsper2, Trim36, Tdrd9, Izumo1, Camk2b, Stra8, Catsper1,
GO:0048738	cardiac muscle tissue dev	0.00779 ( 18 of 2312 genes )	0.00400 ( 136 of 34011 annotated genes )	0.004263	1	Col11a1, Pdgfra, Dll4, Nrg1, Fgfr1, Myl3, Erbb4, AW551984, Dicer1, Tsc1, Ankrd1, Tnnt2, Ryr2, Hey2, Acvr1, Itgb1, Tpm1, Mybpc3,
GO:0009719	response to endogenous st	0.02422 ( 56 of 2312 genes )	0.01714 ( 583 of 34011 annotated genes )	0.004272	1	Pdgfra, Pparg, Slc18a2, Prkcb, Inhba, Sox5, Eif2b4, Areg, Ash2l, Col1a1, Dnmt3a, Atp2a2, Kcnma1, Ptprf, Rptor, Sgk1, Grb2, Agtr1a, Tsc1, Tat, Sord, Aldob, Plcg1, Hmgcs1, Rora, Anxa1, Cuzd1, Prkci, Col6a1, Cpn1, Aanat, Naip2, Cd36, Ghr, Slc2a4, Serpina3c, Srebf1, Inpp5k, Rorb, Jak2, Ubr1, Hyal2, Tgfbr1, Pxn, Col3a1, Ankrd1, Bmp7, Htr7, Fert2, Smarcc1, Retn, Mll2, Hadha, Lyn, Dnmt3b, Abcg1,
GO:0006887	exocytosis	0.00995 ( 23 of 2312 genes )	0.00559 ( 190 of 34011 annotated genes )	0.004283	1	Doc2b, Pi4k2a, Gm885, Pclo, Exoc3, Stxbp5, Cdk5, Scfd2, Vamp7, Mical3, Cacna1h, Abr, Rab3a, Trim36, Cplx1, Sytl2, Stx4a, Adora2b, Rab27a, Ccl5, Exoc5, Lyn, Tac4,
GO:0007178	transmembrane receptor pr	0.01125 ( 26 of 2312 genes )	0.00659 ( 224 of 34011 annotated genes )	0.004421	1	Map3k1, Creb1, Inhba, Htra3, Ilk, Itga8, Fbn2, Hes5, Tgfbr1, Ltbp1, Onecut2, Smad2, Col3a1, Bmp7, Npnt, Rgmb, Ryr2, Furin, Adamtsl2, Acvr1, Bmpr1b, Rbpms, Sox11, Ltbp3, Zfp423, Usp9x,
GO:0030335	positive regulation of ce	0.01125 ( 26 of 2312 genes )	0.00659 ( 224 of 34011 annotated genes )	0.004421	1	Ptprj, Pdgfra, Itga2b, Col1a1, Gnb2l1, Amot, Ctsh, Jak2, Ilk, Figf, Erbb4, Onecut2, Lpar1, Itgb3, Ccl5, Spag9, Fert2, Plcg1, Furin, Csf1r, Sun2, Lyn, Itgb1, Syne2, Cd74, Uts2,
GO:0008610	lipid biosynthetic proces	0.01903 ( 44 of 2312 genes )	0.01282 ( 436 of 34011 annotated genes )	0.004426	1	Hsd3b3, Pi4k2a, Creb1, Dctn6, Ptpla, Pigc, St6galnac6, Ept1, Cacna1h, Sc5d, Pigx, Impa1, Acbd3, Hsd17b3, Apob, Adora2b, Far2, Slc27a5, Dhrs9, Igfbp7, Hmgcs1, Hsd3b6, Anxa1, Hsd17b12, Cdipt, Pla2g4f, Srebf1, Tm7sf2, 2810405K02Rik, Elovl5, Pdss1, Qk, Degs2, Hsd3b2, Lias, Acer3, Dhcr7, Pigk, Pign, Bmpr1b, Plcg2, Gnpat, Abcg1, Cd74,
GO:0043241	protein complex disassemb	0.00519 ( 12 of 2312 genes )	0.00223 ( 76 of 34011 annotated genes )	0.004435	1	Shroom2, Gas2l1, Sgk1, Nrg1, Capza2, Mtrf1l, Aqp2, Etf1, Spna2, Tpm1, Clasp1, Evl,
GO:0010035	response to inorganic sub	0.01384 ( 32 of 2312 genes )	0.00861 ( 293 of 34011 annotated genes )	0.00445	1	Ercc6, Pparg, Mpo, Pxdn, Camk2b, Kcnma1, Map3k5, Aco1, Cnga3, Tat, Sord, Aldob, Mpv17, Fabp4, Anxa1, Mknk2, Aanat, Apobec1, Ppp3ca, Ptprn, Nedd4l, Cd36, Atp7a, Aqp2, Hyal2, Asph, Nfatc4, Tnnt2, Fert2, Ryr2, Slc34a1, Plcg2,
GO:0003062	regulation of heart rate	0.00087 ( 2 of 2312 genes )	0.00006 ( 2 of 34011 annotated genes )	0.004472	1	Srebf1, Tpm1,
GO:0006429	leucyl-tRNA aminoacylatio	0.00087 ( 2 of 2312 genes )	0.00006 ( 2 of 34011 annotated genes )	0.004472	1	Lars2, Lars,
GO:0010070	zygote asymmetric cell di	0.00087 ( 2 of 2312 genes )	0.00006 ( 2 of 34011 annotated genes )	0.004472	1	Dicer1, Rgs14,
GO:0031022	nuclear migration along m	0.00087 ( 2 of 2312 genes )	0.00006 ( 2 of 34011 annotated genes )	0.004472	1	Sun2, Syne2,
GO:0031547	brain-derived neurotrophi	0.00087 ( 2 of 2312 genes )	0.00006 ( 2 of 34011 annotated genes )	0.004472	1	Fam72a, Ntrk2,
GO:0031914	negative regulation of sy	0.00087 ( 2 of 2312 genes )	0.00006 ( 2 of 34011 annotated genes )	0.004472	1	Rgs14, Cdk5,
GO:0034214	protein hexamerization	0.00087 ( 2 of 2312 genes )	0.00006 ( 2 of 34011 annotated genes )	0.004472	1	Panx1, Spast,
GO:0045815	positive regulation of ge	0.00173 ( 4 of 2312 genes )	0.00032 ( 11 of 34011 annotated genes )	0.0045	1	Tet1, Apobec1, Chek1, Phf8,
GO:0051383	kinetochore organization	0.00173 ( 4 of 2312 genes )	0.00032 ( 11 of 34011 annotated genes )	0.0045	1	Cenpt, Smc2, Smc4, Pogz,
GO:0030258	lipid modification	0.00779 ( 18 of 2312 genes )	0.00403 ( 137 of 34011 annotated genes )	0.004608	1	Pi4k2a, Pparg, Cd36, Pikfyve, Acoxl, Inpp5k, Pik3c2g, Soat1, Sacm1l, Hadhb, Ocrl, Smg1, Bdh2, Ip6k2, Inpp4b, Hadha, Pik3ca, Abcg1,
GO:0052547	regulation of peptidase a	0.01514 ( 35 of 2312 genes )	0.00967 ( 329 of 34011 annotated genes )	0.004623	1	Pcid2, Pparg, Spint1, Serpine2, Birc6, Mug1, Map3k5, Kng2, Pcolce2, Serpina3b, Serpinb1c, Hbxip, Spink5, Tfpi, Spink10, Rps3, Serpina1f, Spink13, Cast, Cd109, Serpina3c, Klf4, Cst8, Jak2, Ctsh, Akirin2, Clpx, Pcsk1n, Serpinb12, Aifm3, Nlrp1a, Furin, Sh3rf1, Serpinf1, C6,
GO:0001841	neural tube formation	0.00649 ( 15 of 2312 genes )	0.00312 ( 106 of 34011 annotated genes )	0.004632	1	Ift122, Ift172, Luzp1, Vasp, Med12, Tsc1, Tulp3, Hectd1, Lias, Sema4c, Mib1, Celsr1, Sox11, Stk4, Rock2,
GO:0010948	negative regulation of ce	0.00476 ( 11 of 2312 genes )	0.00197 ( 67 of 34011 annotated genes )	0.00466	1	Apbb1, Pcid2, Apbb2, Chek1, Brd7, Bmp7, Cdc73, Msh2, Stag2, Usp44, Dmrt1,
GO:0046427	positive regulation of JA	0.00389 ( 9 of 2312 genes )	0.00144 ( 49 of 34011 annotated genes )	0.004734	1	Tnfrsf1a, Erbb4, Ccl5, Ghr, Csf1r, Jak2, Lyn, Il12a, Hes5,
GO:0021537	telencephalon development	0.00822 ( 19 of 2312 genes )	0.00435 ( 148 of 34011 annotated genes )	0.004741	1	Dixdc1, Tacc3, Cdk5, Gsk3b, Fgfr1, Slit2, Disc1, Reln, Eomes, Hes5, Pax6, Erbb4, Nfib, Dicer1, Trp73, Tsc1, Zfp238, Ryk, Ntrk2,
GO:0055114	oxidation-reduction proce	0.03547 ( 82 of 2312 genes )	0.02699 ( 918 of 34011 annotated genes )	0.004774	1	Dio2, Hsd3b3, Ndufs1, Pparg, Pam, Acoxl, Pygm, Pxdn, Ndufa1, Sc5d, Cryzl1, 2410016O06Rik, Hsd17b3, Aco1, Ppp1r1a, Ndufa10, Kdm3b, Kdm2a, Fmo1, Aldob, Hsd11b2, Duox1, Tmx3, Dus1l, Cox8c, Gmpr2, Mical3, Ppp1cb, Inpp5k, Nfatc4, Tet1, Akr1b7, Aldh1l1, Fastkd2, Ppp1r3b, Cybasc3, Akr1c13, Hsd3b2, Dhcr7, Acad9, Rsad1, Pdhb, Kdm5a, Pgls, Ndufa8, Gsk3b, Mpo, Pnpt1, Gnas, Tyw1, Ndufa2, Ogfod2, Bdh2, Dhdh, …
GO:0043407	negative regulation of MA	0.00433 ( 10 of 2312 genes )	0.00171 ( 58 of 34011 annotated genes )	0.004782	1	Ptprj, Ptpn6, Trp73, Gsk3b, Bmp7, Hipk3, Inpp5k, Rgs14, Lyn, Hyal2,
GO:0003015	heart process	0.00735 ( 17 of 2312 genes )	0.00373 ( 127 of 34011 annotated genes )	0.004794	1	Map2k3, Srebf1, Jak2, Atp2a2, Casq2, Hdac4, Myl3, Scn10a, Fkbp1b, Adrbk1, Tnnt2, Ryr2, Hey2, Cacna1e, Tpm1, Mybpc3, Uts2,
GO:0060047	heart contraction	0.00735 ( 17 of 2312 genes )	0.00373 ( 127 of 34011 annotated genes )	0.004794	1	Map2k3, Srebf1, Jak2, Atp2a2, Casq2, Hdac4, Myl3, Scn10a, Fkbp1b, Adrbk1, Tnnt2, Ryr2, Hey2, Cacna1e, Tpm1, Mybpc3, Uts2,
GO:0000122	negative regulation of tr	0.02249 ( 52 of 2312 genes )	0.01579 ( 537 of 34011 annotated genes )	0.004897	1	Ciita, Pparg, Dll4, Sp3, Eid1, Cdc73, Foxp4, Zfp354a, Dnmt3a, Cux1, Hes5, Ighmbp2, Rfx5, Nfib, Hdac4, Atf7ip, Zfp238, Hey2, Trps1, Osr2, Rbbp7, Ift172, Nfix, Pias1, Cd36, Fgfr1, Nipbl, Klf4, Srebf1, Cbx8, Ripply3, Whsc1, Glis2, Tcfcp2l1, Rbm10, Akirin2, Aes, Trp73, Rbbp8, Per1, Dicer1, Setd8, Suz12, Ankrd1, Hipk3, Zfp148, Wwp2, Pcna, Rbm15, Dnmt3b, Sox11, Dmrt1,
GO:0031646	positive regulation of ne	0.00519 ( 12 of 2312 genes )	0.00226 ( 77 of 34011 annotated genes )	0.004941	1	Erbb4, Dicer1, Serpine2, Cartpt, Htr7, Gria4, Reln, Rgs14, Camk2b, Ntrk2, Lama2, Uts2,
GO:0045793	positive regulation of ce	0.00649 ( 15 of 2312 genes )	0.00315 ( 107 of 34011 annotated genes )	0.005062	1	Ino80, Trp73, Sgk1, Trpv2, Tnfrsf12a, Dscam, Nrg1, Mapt, Disc1, Ilk, 2400003C14Rik, Hsp90ab1, Sema7a, Tgfbr1, Exosc9,
GO:0006898	receptor-mediated endocyt	0.00606 ( 14 of 2312 genes )	0.00285 ( 97 of 34011 annotated genes )	0.005113	1	Rspo1, Grb2, Arhgap27, Gtf2h2, Ghr, Ahi1, Adrbk1, Cd2ap, Sh3gl2, Cltc, Hip1r, Scyl2, Slc9a3, Lrp2,
GO:0010881	regulation of cardiac mus	0.00130 ( 3 of 2312 genes )	0.00018 ( 6 of 34011 annotated genes )	0.005127	1	Ryr2, Fkbp1b, Casq2,
GO:0021800	cerebral cortex tangentia	0.00130 ( 3 of 2312 genes )	0.00018 ( 6 of 34011 annotated genes )	0.005127	1	Reln, Fgfr1, Slit2,
GO:0031581	hemidesmosome assembly	0.00130 ( 3 of 2312 genes )	0.00018 ( 6 of 34011 annotated genes )	0.005127	1	Dst, Col17a1, Itgb4,
GO:0045213	neurotransmitter receptor	0.00130 ( 3 of 2312 genes )	0.00018 ( 6 of 34011 annotated genes )	0.005127	1	Dmd, Nrg1, Agrn,
GO:0060907	positive regulation of ma	0.00130 ( 3 of 2312 genes )	0.00018 ( 6 of 34011 annotated genes )	0.005127	1	Cd36, Sema7a, Cd74,
GO:0070544	histone H3-K36 demethylat	0.00130 ( 3 of 2312 genes )	0.00018 ( 6 of 34011 annotated genes )	0.005127	1	Kdm2a, Phf8, 2410016O06Rik,
GO:0030516	regulation of axon extens	0.00346 ( 8 of 2312 genes )	0.00121 ( 41 of 34011 annotated genes )	0.005186	1	Trpv2, Tnfrsf12a, Dscam, Mapt, Disc1, Ilk, Sema7a, Ryk,
GO:0035335	peptidyl-tyrosine dephosp	0.00346 ( 8 of 2312 genes )	0.00121 ( 41 of 34011 annotated genes )	0.005186	1	Ptprj, Ptpn6, Ptpn9, Ptprd, Ptpn3, Ptprf, Ptpru, Dusp28,
GO:0046128	purine ribonucleoside met	0.00346 ( 8 of 2312 genes )	0.00121 ( 41 of 34011 annotated genes )	0.005186	1	Ocln, Aprt, Pank1, Dnmt3a, Nt5c3, Ppcdc, Dnmt3b, Pcmt1,
GO:0046823	negative regulation of nu	0.00346 ( 8 of 2312 genes )	0.00121 ( 41 of 34011 annotated genes )	0.005186	1	Tacc3, Cd36, Cdk5, Gsk3b, Bard1, Faf1, Cyld, Fbxw11,
GO:0006979	response to oxidative str	0.00995 ( 23 of 2312 genes )	0.00567 ( 193 of 34011 annotated genes )	0.005188	1	Ercc6, Ptprn, Cd36, Wrn, Atp7a, Mpo, Pnpt1, Pxdn, Jak2, Hyal2, Arnt, Gab1, Ndufb4, Map3k5, Mill2, Tat, Adrbk1, Gclm, Fert2, Lias, Mpv17, Rgs14, Anxa1,
GO:0045637	regulation of myeloid cel	0.00735 ( 17 of 2312 genes )	0.00376 ( 128 of 34011 annotated genes )	0.005192	1	Inhba, Cdc73, Gnas, Prmt1, Gas2l1, Hmgb3, Mll5, Ankrd54, Cartpt, Il17a, Itgb3, Ccl5, Clec2g, Csf1r, Lyn, Rbm15, Rbfox2,
GO:0060070	canonical Wnt receptor si	0.00952 ( 22 of 2312 genes )	0.00535 ( 182 of 34011 annotated genes )	0.005216	1	Dixdc1, Rspo1, Trpm4, Gsk3b, Ankrd6, Frzb, Disc1, Fzd7, Col1a1, Sox10, Ilk, Scyl2, Tnks2, Stk4, Ubr5, Aes, Ccny, Med12, Ptpru, Ryr2, Cyld, Dkk2,
GO:0006944	cellular membrane fusion	0.00476 ( 11 of 2312 genes )	0.00200 ( 68 of 34011 annotated genes )	0.005231	1	Doc2b, Stx4a, Stx5a, 5730419I09Rik, Vamp7, Vcpip1, Rab3a, Izumo1, Anxa1, Catsper1, Eea1,
GO:0045321	leukocyte activation	0.02206 ( 51 of 2312 genes )	0.01549 ( 527 of 34011 annotated genes )	0.005349	1	Pcid2, Pi4k2a, Slamf1, Il7, Gm885, Prkcb, Sp3, Jag2, Mink1, Fzd7, Msh2, Abr, Cd276, Exosc3, Cnr2, Ptpn6, Mill2, Ncaph2, Pglyrp3, Mll5, Adora2b, Hmgb3, Lgals8, Rab27a, Vcam1, Bank1, Peli1, Hells, Rora, Anxa1, Sema4a, Il27, Efnb1, Vtcn1, B2m, H2-DMa, Atp7a, Vamp7, Ctla4, Eomes, Hyal2, Ccl5, Fkbp1b, Fert2, Tyrobp, Lyn, Il12a, Sox11, Tac4, Plcg2, Cd74,
GO:0021549	cerebellum development	0.00433 ( 10 of 2312 genes )	0.00173 ( 59 of 34011 annotated genes )	0.005419	1	Dixdc1, Kndc1, Cdk5, Serpine2, Atp7a, Zfp238, Sema4c, Rora, Cntn1, Gnpat,
GO:0000186	activation of MAPKK activ	0.00303 ( 7 of 2312 genes )	0.00097 ( 33 of 34011 annotated genes )	0.005427	1	Map3k5, Ercc6, Map3k1, Araf, Jak2, Tgfbr1, Cartpt,
GO:0010743	regulation of macrophage	0.00216 ( 5 of 2312 genes )	0.00053 ( 18 of 34011 annotated genes )	0.005473	1	Apob, Pparg, Cd36, Itgb3, Abcg1,
GO:0048520	positive regulation of be	0.00519 ( 12 of 2312 genes )	0.00229 ( 78 of 34011 annotated genes )	0.005492	1	Figf, Ptprj, Scg2, Lpar1, Dscam, Ccl5, Stra6, Slit2, Alb, Hc, Uts2, Cd74,
GO:0007605	sensory perception of sou	0.00735 ( 17 of 2312 genes )	0.00379 ( 129 of 34011 annotated genes )	0.005617	1	Col11a1, Fgfr1, Nipbl, Otog, Col1a1, Sobp, Kcnma1, Gjb6, Myo6, Tmie, Col11a2, Cdh23, Ush1c, Otoa, Bsnd, Mpv17, Mcoln3,
GO:0048736	appendage development	0.00822 ( 19 of 2312 genes )	0.00444 ( 151 of 34011 annotated genes )	0.005891	1	Ift122, Mycn, Tmem107, Aff3, Fgfr1, Atp7a, Tulp3, Nipbl, Gnas, Dync2h1, Fbn2, Asph, Dicer1, Bmp7, Fbxw4, Bmpr1b, Osr2, Sox11, Alx4,
GO:0060173	limb development	0.00822 ( 19 of 2312 genes )	0.00444 ( 151 of 34011 annotated genes )	0.005891	1	Ift122, Mycn, Tmem107, Aff3, Fgfr1, Atp7a, Tulp3, Nipbl, Gnas, Dync2h1, Fbn2, Asph, Dicer1, Bmp7, Fbxw4, Bmpr1b, Osr2, Sox11, Alx4,
GO:0048754	branching morphogenesis o	0.00865 ( 20 of 2312 genes )	0.00476 ( 162 of 34011 annotated genes )	0.005946	1	Mycn, Ppp3r1, Maged1, Gna13, Rasip1, Dll4, Slit2, Areg, Celsr1, Ctsh, Ilk, Stk4, Nfatc4, Pxn, Dicer1, Agtr1a, Bmp7, Npnt, Rbm15, Acvr1,
GO:0043547	positive regulation of GT	0.00649 ( 15 of 2312 genes )	0.00320 ( 109 of 34011 annotated genes )	0.006019	1	Tbc1d15, Rgs9, Rap1gds1, Arfgap1, Rasgrp3, Gsk3b, Tsc1, Ralgapa1, Arhgef7, Arhgap27, Arhgap1, Dock7, Gnb2l1, Rgs14, Ralgapb,
GO:0006942	regulation of striated mu	0.00346 ( 8 of 2312 genes )	0.00123 ( 42 of 34011 annotated genes )	0.006038	1	Myl3, Hdac4, Scn10a, Fkbp1b, Adrbk1, Tnnt3, Ryr2, Casq2,
GO:0051494	negative regulation of cy	0.00519 ( 12 of 2312 genes )	0.00232 ( 79 of 34011 annotated genes )	0.006091	1	Shroom2, Map3k1, Gas2l1, Sgk1, Slit2, Clip3, Inpp5k, Capza2, Spna2, Tpm1, Clasp1, Evl,
GO:0045216	cell-cell junction organi	0.00433 ( 10 of 2312 genes )	0.00176 ( 60 of 34011 annotated genes )	0.006122	1	Shroom2, Ocln, Pard3, Plekha7, Fbf1, Csf1r, Mpp7, Prkci, Itgb1, Gnpat,
GO:0048709	oligodendrocyte different	0.00433 ( 10 of 2312 genes )	0.00176 ( 60 of 34011 annotated genes )	0.006122	1	Pax6, Trp73, Dicer1, Pparg, Cdk5, Sox5, Eif2b4, Sox10, Ntrk2, Hes5,
GO:0002275	myeloid cell activation i	0.00389 ( 9 of 2312 genes )	0.00150 ( 51 of 34011 annotated genes )	0.006219	1	Pi4k2a, Gm885, Adora2b, Fert2, Vamp7, Abr, Tyrobp, Lyn, Tac4,
GO:0019228	regulation of action pote	0.00692 ( 16 of 2312 genes )	0.00353 ( 120 of 34011 annotated genes )	0.006329	1	Lgi4, Dpp6, Mpdz, Eif2b4, Cldn5, Ilk, Hes5, Kcnma1, Dicer1, Scn9a, Qk, Tsc1, Scn3a, Gpc1, Jam3, Gnpat,
GO:0046328	regulation of JNK cascade	0.00692 ( 16 of 2312 genes )	0.00353 ( 120 of 34011 annotated genes )	0.006329	1	Dixdc1, Ercc6, Map3k1, Map4k4, Traf2, Mink1, Fktn, Zfp622, Gab1, Trp73, Hipk3, Spag9, Sh3rf1, Mapk8ip3, Taok1, Magi3,
GO:0010878	cholesterol storage	0.00173 ( 4 of 2312 genes )	0.00035 ( 12 of 34011 annotated genes )	0.006395	1	Apob, Pparg, Cd36, Soat1,
GO:0014808	release of sequestered ca	0.00173 ( 4 of 2312 genes )	0.00035 ( 12 of 34011 annotated genes )	0.006395	1	Ryr1, Ryr2, Fkbp1b, Casq2,
GO:0033160	positive regulation of pr	0.00173 ( 4 of 2312 genes )	0.00035 ( 12 of 34011 annotated genes )	0.006395	1	Ubr5, Tnfrsf1a, Jak2, Hsp90ab1,
GO:0033233	regulation of protein sum	0.00173 ( 4 of 2312 genes )	0.00035 ( 12 of 34011 annotated genes )	0.006395	1	Hdac4, Pias1, Tollip, Arnt,
GO:0045540	regulation of cholesterol	0.00173 ( 4 of 2312 genes )	0.00035 ( 12 of 34011 annotated genes )	0.006395	1	Srebf1, Dhcr7, Apob, Abcg1,
GO:0060968	regulation of gene silenc	0.00173 ( 4 of 2312 genes )	0.00035 ( 12 of 34011 annotated genes )	0.006395	1	Uty, Tet1, Apobec1, Phf8,
GO:0070296	sarcoplasmic reticulum ca	0.00173 ( 4 of 2312 genes )	0.00035 ( 12 of 34011 annotated genes )	0.006395	1	Ryr1, Ryr2, Fkbp1b, Casq2,
GO:0006406	mRNA export from nucleus	0.00260 ( 6 of 2312 genes )	0.00076 ( 26 of 34011 annotated genes )	0.006408	1	Nxf1, Ncbp1, Bat1a, Nup160, Nup107, Nup214,
GO:0030199	collagen fibril organizat	0.00303 ( 7 of 2312 genes )	0.00100 ( 34 of 34011 annotated genes )	0.006447	1	Col11a1, Col1a1, Col5a1, Col3a1, Col11a2, Tgfbr1, Atp7a,
GO:0043488	regulation of mRNA stabil	0.00303 ( 7 of 2312 genes )	0.00100 ( 34 of 34011 annotated genes )	0.006447	1	Pcid2, Elavl1, Apobec1, Carhsp1, Igf2bp1, Rbm10, Dhx9,
GO:0070555	response to interleukin-1	0.00303 ( 7 of 2312 genes )	0.00100 ( 34 of 34011 annotated genes )	0.006447	1	Il1r1, Aes, Hdac4, Prkci, Hyal2, Ankrd1, Il17a,
GO:0022037	metencephalon development	0.00476 ( 11 of 2312 genes )	0.00206 ( 70 of 34011 annotated genes )	0.006537	1	Dixdc1, Kndc1, Cdk5, Serpine2, Otx1, Atp7a, Zfp238, Sema4c, Rora, Cntn1, Gnpat,
GO:0001667	ameboidal cell migration	0.00649 ( 15 of 2312 genes )	0.00323 ( 110 of 34011 annotated genes )	0.006549	1	Efnb1, Tns1, Erbb4, Itgb3, Fert2, Plcg1, Macf1, Sox10, Amot, Ctsh, Acvr1, Syne2, Hyal2, Sgpl1, Uts2,
GO:0030902	hindbrain development	0.00649 ( 15 of 2312 genes )	0.00323 ( 110 of 34011 annotated genes )	0.006549	1	Dixdc1, Pax6, Nfib, Kndc1, Tbr1, Cdk5, Serpine2, Otx1, Atp7a, Ahi1, Zfp238, Sema4c, Rora, Cntn1, Gnpat,
GO:0008544	epidermis development	0.01081 ( 25 of 2312 genes )	0.00647 ( 220 of 34011 annotated genes )	0.006762	1	Ltb, Scel, Prss8, Col5a1, Tnfrsf19, Inhba, Atp2c1, Atp7a, Gnas, Klf4, Col1a1, Celsr1, Maff, Stk4, Gab1, Pax6, Dicer1, Krt71, Col3a1, Ryr1, Anxa1, Tfdp1, Spink5, Alx4, Rock2,
GO:0009411	response to UV	0.00562 ( 13 of 2312 genes )	0.00265 ( 90 of 34011 annotated genes )	0.006784	1	Rad18, Ino80, Nfatc4, Brca2, Ercc6, Trp73, Ube2a, Chek1, Wrn, Rpain, Msh2, Il12a, Hyal2,
GO:0050920	regulation of chemotaxis	0.00562 ( 13 of 2312 genes )	0.00265 ( 90 of 34011 annotated genes )	0.006784	1	Figf, Ptprj, Scg2, Pdgfra, Lpar1, Dscam, Ccl5, Slit2, Lyn, Hc, Ryk, Jam3, Cd74,
GO:0051604	protein maturation	0.00692 ( 16 of 2312 genes )	0.00356 ( 121 of 34011 annotated genes )	0.006853	1	Ift172, Prss12, Pcsk1, Vps35, Serpine2, Ctsh, Dync2h1, Chst8, 5033414D02Rik, Pcsk1n, Aph1c, Corin, Ctse, Cr1l, Furin, C6,
GO:0048675	axon extension	0.00433 ( 10 of 2312 genes )	0.00179 ( 61 of 34011 annotated genes )	0.006893	1	Trpv2, Tnfrsf12a, Dscam, Mapt, Dclk1, Slit2, Disc1, Ilk, Sema7a, Ryk,
GO:0051053	negative regulation of DN	0.00433 ( 10 of 2312 genes )	0.00179 ( 61 of 34011 annotated genes )	0.006893	1	Terf2ip, Rad18, Rps3, Brca2, Clspn, Ankrd1, Pds5a, Msh2, Stra8, Stag2,
GO:0070167	regulation of biomineral	0.00433 ( 10 of 2312 genes )	0.00179 ( 61 of 34011 annotated genes )	0.006893	1	Nbr1, Dicer1, Bmp7, Acvr1, Bmpr1b, Cd276, Fam20c, Osr2, Fbn2, Ltbp3,
GO:0060562	epithelial tube morphogen	0.01211 ( 28 of 2312 genes )	0.00750 ( 255 of 34011 annotated genes )	0.006917	1	Ift122, Ift172, Vasp, Maged1, Dll4, Tulp3, Slit2, Hectd1, Areg, Tead1, Celsr1, Ctsh, Ilk, Hs2st1, Stk4, Luzp1, Agtr1a, Med12, Tsc1, Ahi1, Npnt, Lias, Ryr2, Sema4c, Mib1, Acvr1, Sox11, Rock2,
GO:0000724	double-strand break repai	0.00346 ( 8 of 2312 genes )	0.00126 ( 43 of 34011 annotated genes )	0.006992	1	Terf2ip, Ino80, Nfkbil2, Brca2, Smc5, Rbbp8, 2310035K24Rik, Chek1,
GO:0000725	recombinational repair	0.00346 ( 8 of 2312 genes )	0.00126 ( 43 of 34011 annotated genes )	0.006992	1	Terf2ip, Ino80, Nfkbil2, Brca2, Smc5, Rbbp8, 2310035K24Rik, Chek1,
GO:0000819	sister chromatid segregat	0.00346 ( 8 of 2312 genes )	0.00126 ( 43 of 34011 annotated genes )	0.006992	1	Ino80, Smc5, Espl1, Smc2, Nipbl, Top2a, Smc4, Pogz,
GO:0055010	ventricular cardiac muscl	0.00346 ( 8 of 2312 genes )	0.00126 ( 43 of 34011 annotated genes )	0.006992	1	Tnnt2, Hey2, Ryr2, Myl3, Col11a1, Dll4, Tpm1, Mybpc3,
GO:0033198	response to ATP	0.00216 ( 5 of 2312 genes )	0.00056 ( 19 of 34011 annotated genes )	0.007024	1	Asph, Hsp90b1, Panx1, Dgkq, Plcg2,
GO:0034605	cellular response to heat	0.00216 ( 5 of 2312 genes )	0.00056 ( 19 of 34011 annotated genes )	0.007024	1	Arpp21, Clpb, Scara5, Rbbp7, Dhx9,
GO:0045672	positive regulation of os	0.00216 ( 5 of 2312 genes )	0.00056 ( 19 of 34011 annotated genes )	0.007024	1	Gnas, Csf1r, Ccl5, Itgb3, Il17a,
GO:0045822	negative regulation of he	0.00216 ( 5 of 2312 genes )	0.00056 ( 19 of 34011 annotated genes )	0.007024	1	Adrbk1, Jak2, Atp2a2, Fkbp1b, Uts2,
GO:0051898	negative regulation of pr	0.00216 ( 5 of 2312 genes )	0.00056 ( 19 of 34011 annotated genes )	0.007024	1	Ptprj, Klf4, Slc9a3r1, Inpp5k, Hyal2,
GO:0007260	tyrosine phosphorylation	0.00389 ( 9 of 2312 genes )	0.00153 ( 52 of 34011 annotated genes )	0.007084	1	Tnfrsf1a, Erbb4, Ccl5, Fert2, Csf1r, Jak2, Lyn, Il12a, Hes5,
GO:0030168	platelet activation	0.00389 ( 9 of 2312 genes )	0.00153 ( 52 of 34011 annotated genes )	0.007084	1	Ptprj, Fhad1, Pdgfra, Gna13, Serpine2, Itgb3, Itga2b, Lyn, Evl,
GO:0032269	negative regulation of ce	0.01168 ( 27 of 2312 genes )	0.00717 ( 244 of 34011 annotated genes )	0.007141	1	Fmr1, Wac, Cdk5, Kirrel, Igf2bp1, Serpine2, Slit2, Cpeb3, Ide, Fam129a, Eif2b4, Inpp5k, Gnb2l1, Cpeb2, Ptpn6, Bat3, Tsc1, Itgb3, Patl1, Furin, Cr1l, Lyn, Dnmt3b, St13, Spink5, Ptpn3, Usp44,
GO:0051047	positive regulation of se	0.01081 ( 25 of 2312 genes )	0.00650 ( 221 of 34011 annotated genes )	0.007153	1	Apbb1, Doc2b, Creb1, Pcsk1, Stxbp5, Cdk5, Cacna1h, Jak2, Hyal2, Sytl2, Slc18a1, Adora2b, Rab27a, Agtr1a, Panx1, Ankrd1, Cartpt, Adrbk1, Csf1r, Nlrp1a, Hc, Sox11, Tac4, Pfkfb2, Myrip,
GO:0007126	meiosis	0.00779 ( 18 of 2312 genes )	0.00420 ( 143 of 34011 annotated genes )	0.007194	1	Brca2, Clgn, Top2a, Msh2, Tdrd9, Camk2b, Smc4, Stag2, Pms2, Rbbp8, Bat3, Piwil4, Smc2, Espl1, Xrn1, Stra8, Sgol1, Dmrt1,
GO:0051327	M phase of meiotic cell c	0.00779 ( 18 of 2312 genes )	0.00420 ( 143 of 34011 annotated genes )	0.007194	1	Brca2, Clgn, Top2a, Msh2, Tdrd9, Camk2b, Smc4, Stag2, Pms2, Rbbp8, Bat3, Piwil4, Smc2, Espl1, Xrn1, Stra8, Sgol1, Dmrt1,
GO:0006310	DNA recombination	0.00865 ( 20 of 2312 genes )	0.00485 ( 165 of 34011 annotated genes )	0.007267	1	Terf2ip, Rad18, Ino80, Brca2, Smc5, Wrn, Rad51ap1, Rpain, Rad51l3, Top2a, Msh2, Exosc3, Smc4, Pms2, Nfkbil2, Rbbp8, Chek1, Smc2, 2310035K24Rik, Stra8,
GO:0010921	regulation of phosphatase	0.00562 ( 13 of 2312 genes )	0.00268 ( 91 of 34011 annotated genes )	0.007442	1	Ppp1r12a, Fkbp15, Lmtk3, Hsp90b1, Csrnp2, Sh3rf2, Tsc1, Fkbp1b, Npnt, Wnk1, Elfn2, Jak2, Sytl2,
GO:0015758	glucose transport	0.00519 ( 12 of 2312 genes )	0.00238 ( 81 of 34011 annotated genes )	0.007443	1	G6pc3, Erbb3, Erbb4, Slc45a1, Prkcb, Nrg1, Slc2a3, Fgf21, Slc2a4, Clip3, Inpp5k, Prkci,
GO:0048588	developmental cell growth	0.00519 ( 12 of 2312 genes )	0.00238 ( 81 of 34011 annotated genes )	0.007443	1	Trpv2, Tnfrsf12a, Dscam, Mapt, Dclk1, Slit2, Disc1, Mll2, Ilk, 2400003C14Rik, Sema7a, Ryk,
GO:0046486	glycerolipid metabolic pr	0.01081 ( 25 of 2312 genes )	0.00653 ( 222 of 34011 annotated genes )	0.007563	1	Cdipt, Pi4k2a, Pip4k2c, Cd36, Pikfyve, Pigc, Srebf1, Inpp5k, Pigx, Pik3c2g, Impa1, Sacm1l, Ocrl, Smg1, Ip6k2, Apob, Inpp4b, Slc27a5, Pigk, Pign, Csf1r, Pon1, Pik3ca, Plcg2, Gnpat,
GO:0007098	centrosome cycle	0.00303 ( 7 of 2312 genes )	0.00103 ( 35 of 34011 annotated genes )	0.007602	1	Cntrob, Brca2, Chordc1, Chek1, Sac3d1, Ccdc52, Rock2,
GO:0030838	positive regulation of ac	0.00303 ( 7 of 2312 genes )	0.00103 ( 35 of 34011 annotated genes )	0.007602	1	Fert2, Map3k1, Grb2, Kirrel, Jmy, Arpc2, Evl,
GO:0060323	head morphogenesis	0.00303 ( 7 of 2312 genes )	0.00103 ( 35 of 34011 annotated genes )	0.007602	1	Asph, Cdk2ap1, Col1a1, Pdgfra, Nipbl, Sgpl1, Stra6,
GO:0070371	ERK1 and ERK2 cascade	0.00735 ( 17 of 2312 genes )	0.00391 ( 133 of 34011 annotated genes )	0.007607	1	Pdgfra, Klf4, Slc9a3r1, Ctsh, Sema7a, Rps6ka6, Ptpn6, Erbb4, Itgb3, Gcg, Npnt, Fgf21, Csf1r, Lyn, Rgs14, Ros1, Cd74,
GO:0007052	mitotic spindle organizat	0.00260 ( 6 of 2312 genes )	0.00079 ( 27 of 34011 annotated genes )	0.007781	1	Cltc, Dctn2, Flna, Mybl2, Kif2a, Ccdc52,
GO:0051298	centrosome duplication	0.00260 ( 6 of 2312 genes )	0.00079 ( 27 of 34011 annotated genes )	0.007781	1	Cntrob, Brca2, Chordc1, Sac3d1, Ccdc52, Rock2,
GO:0045087	innate immune response	0.01298 ( 30 of 2312 genes )	0.00826 ( 281 of 34011 annotated genes )	0.007866	1	Il27, Oas3, Ciita, Oasl1, Pparg, Cd36, Polr3h, Nlrc5, Jak2, Isg20, Akirin2, Tollip, Ptpn6, Map3k5, Il1r1, Pglyrp3, Nlrx1, Rab27a, Ccl5, Traf3, Peli1, Klrg1, Csf1r, Cr1l, Lyn, Hc, Il12a, Mx1, Cd74, Tbk1,
GO:0003231	cardiac ventricle develop	0.00606 ( 14 of 2312 genes )	0.00300 ( 102 of 34011 annotated genes )	0.007978	1	Luzp1, Myl3, Col11a1, Dll4, Stra6, Frs2, Tnnt2, Ryr2, Hey2, Rbm15, Whsc1, Sox11, Mybpc3, Tpm1,
GO:0050731	positive regulation of pe	0.00606 ( 14 of 2312 genes )	0.00300 ( 102 of 34011 annotated genes )	0.007978	1	Tnfrsf1a, Erbb4, Cd36, Ccl5, Itgb3, Ghr, Reln, Csf1r, Jak2, Lyn, Itgb1, Il12a, Hes5, Cd74,
GO:0001655	urogenital system develop	0.01081 ( 25 of 2312 genes )	0.00656 ( 223 of 34011 annotated genes )	0.007992	1	Irx3, Maged1, Pdgfra, Stra6, Slit2, Frs2, Itga8, Slc12a1, Tgfbr1, Agtr1a, Bat3, Aph1c, Tsc1, Bmp7, Itgb3, Ahi1, Arl3, Mpv17, Hells, Acvr1, Serpinf1, Sulf2, Osr2, Sgpl1, Psap,
GO:0032147	activation of protein kin	0.00692 ( 16 of 2312 genes )	0.00362 ( 123 of 34011 annotated genes )	0.008003	1	Ercc6, Map3k1, Traf2, Nrg1, Ghr, Araf, Jak2, Ikbkg, Tgfbr1, Map3k5, Clspn, Agtr1a, Cartpt, Itgb3, Dgkq, Ccdc88a,
GO:0007173	epidermal growth factor r	0.00389 ( 9 of 2312 genes )	0.00156 ( 53 of 34011 annotated genes )	0.008038	1	Gab1, Ptprj, Emr4, Pde6h, Afap1l2, Aplp2, Areg, Fert2, Ptprf,
GO:0050792	regulation of viral repro	0.00389 ( 9 of 2312 genes )	0.00156 ( 53 of 34011 annotated genes )	0.008038	1	Oas3, Map3k1, Oasl1, Dicer1, Tarbp2, Ccl5, Top2a, Inpp5k, Rsf1,
GO:0048639	positive regulation of de	0.00346 ( 8 of 2312 genes )	0.00129 ( 44 of 34011 annotated genes )	0.008056	1	Trpv2, Tnfrsf12a, Dscam, Mapt, Disc1, Ilk, 2400003C14Rik, Sema7a,
GO:0060759	regulation of response to	0.00346 ( 8 of 2312 genes )	0.00129 ( 44 of 34011 annotated genes )	0.008056	1	Aes, Pparg, Ccl5, Slit2, Klf4, Nlrc5, Cd74, Ptprf,
GO:0051971	positive regulation of tr	0.00476 ( 11 of 2312 genes )	0.00212 ( 72 of 34011 annotated genes )	0.008085	1	Erbb4, Serpine2, Cartpt, Htr7, Gria4, Reln, Rgs14, Camk2b, Ntrk2, Lama2, Uts2,
GO:0061025	membrane fusion	0.00476 ( 11 of 2312 genes )	0.00212 ( 72 of 34011 annotated genes )	0.008085	1	Doc2b, Stx4a, Stx5a, 5730419I09Rik, Vamp7, Vcpip1, Rab3a, Izumo1, Anxa1, Catsper1, Eea1,
GO:0007218	neuropeptide signaling pa	0.00562 ( 13 of 2312 genes )	0.00271 ( 92 of 34011 annotated genes )	0.00815	1	Bai1, Pcsk1n, Emr4, Pnoc, Gpr97, Cartpt, Gpr64, Gpr56, Emr1, Lphn1, Celsr1, Pdyn, Mchr1,
GO:0031334	positive regulation of pr	0.00562 ( 13 of 2312 genes )	0.00271 ( 92 of 34011 annotated genes )	0.00815	1	Map3k1, Grb2, Kirrel, Gsk3b, Jmy, Mapt, Arpc2, Ide, Fert2, Gnb2l1, Faf1, Mpp7, Evl,
GO:0051291	protein heterooligomeriza	0.00562 ( 13 of 2312 genes )	0.00271 ( 92 of 34011 annotated genes )	0.00815	1	Tnfrsf1a, Gchfr, Pdss1, Traf2, Grb2, Hr, Tsc1, Ide, Kcnh6, Tnnt2, Col1a1, Ilk, Col6a1,
GO:0070925	organelle assembly	0.00562 ( 13 of 2312 genes )	0.00271 ( 92 of 34011 annotated genes )	0.00815	1	Ino80, Haus2, Cenpt, Dicer1, Mybl2, Sac3d1, Ccdc52, Rpl24, Cltc, Flna, Atg3, Haus6, Pogz,
GO:0071845	cellular component disass	0.00735 ( 17 of 2312 genes )	0.00394 ( 134 of 34011 annotated genes )	0.008184	1	Acin1, Nrg1, Top2a, Capza2, Aqp2, Etf1, Evl, Shroom2, Gas2l1, Sgk1, Smarce1, Kif5b, Smarcc1, Mtrf1l, Tpm1, Spna2, Clasp1,
GO:0008645	hexose transport	0.00519 ( 12 of 2312 genes )	0.00241 ( 82 of 34011 annotated genes )	0.008202	1	G6pc3, Erbb3, Erbb4, Slc45a1, Prkcb, Nrg1, Slc2a3, Fgf21, Slc2a4, Clip3, Inpp5k, Prkci,
GO:0018205	peptidyl-lysine modificat	0.00779 ( 18 of 2312 genes )	0.00426 ( 145 of 34011 annotated genes )	0.00828	1	Apbb1, Brca2, Ing5, Ctcf, Brd7, Eid1, Atp7a, Tada3, Meaf6, Whsc1, Dot1l, Phf16, Hdac4, Suv420h1, Bat3, Setd8, Mll1, Mll3,
GO:0045792	negative regulation of ce	0.00779 ( 18 of 2312 genes )	0.00426 ( 145 of 34011 annotated genes )	0.00828	1	Apbb1, Ptprj, Il7, Pparg, Inhba, Serpine2, Smarca2, Frzb, Slit2, Gnb2l1, Tro, Hyal2, Gas2l1, Ip6k2, Apbb2, Tsc1, Rbbp7, Ryk,
GO:0007028	cytoplasm organization	0.00130 ( 3 of 2312 genes )	0.00021 ( 7 of 34011 annotated genes )	0.008527	1	Kif5b, Rrn3, Tcfcp2l1,
GO:0007097	nuclear migration	0.00130 ( 3 of 2312 genes )	0.00021 ( 7 of 34011 annotated genes )	0.008527	1	Sun2, Cdc42bpa, Syne2,
GO:0031338	regulation of vesicle fus	0.00130 ( 3 of 2312 genes )	0.00021 ( 7 of 34011 annotated genes )	0.008527	1	Doc2b, Rab3a, Anxa1,
GO:0034374	low-density lipoprotein p	0.00130 ( 3 of 2312 genes )	0.00021 ( 7 of 34011 annotated genes )	0.008527	1	Apob, Abcg1, Mpo,
GO:0034755	iron ion transmembrane tr	0.00130 ( 3 of 2312 genes )	0.00021 ( 7 of 34011 annotated genes )	0.008527	1	Slc39a14, Slc25a37, Scara5,
GO:0042073	intraflagellar transport	0.00130 ( 3 of 2312 genes )	0.00021 ( 7 of 34011 annotated genes )	0.008527	1	Ttc21b, Ift46, Arl3,
GO:0045217	cell-cell junction mainte	0.00130 ( 3 of 2312 genes )	0.00021 ( 7 of 34011 annotated genes )	0.008527	1	Shroom2, Csf1r, Plekha7,
GO:0046689	response to mercury ion	0.00130 ( 3 of 2312 genes )	0.00021 ( 7 of 34011 annotated genes )	0.008527	1	Aqp2, Slc34a1, Tat,
GO:0055094	response to lipoprotein s	0.00130 ( 3 of 2312 genes )	0.00021 ( 7 of 34011 annotated genes )	0.008527	1	Pparg, Cd36, Abcg1,
GO:0060969	negative regulation of ge	0.00130 ( 3 of 2312 genes )	0.00021 ( 7 of 34011 annotated genes )	0.008527	1	Tet1, Apobec1, Phf8,
GO:0072567	chemokine (C-X-C motif) l	0.00130 ( 3 of 2312 genes )	0.00021 ( 7 of 34011 annotated genes )	0.008527	1	Klf4, Ccl5, Cd74,
GO:2000341	regulation of chemokine (	0.00130 ( 3 of 2312 genes )	0.00021 ( 7 of 34011 annotated genes )	0.008527	1	Klf4, Ccl5, Cd74,
GO:0001838	embryonic epithelial tube	0.00692 ( 16 of 2312 genes )	0.00365 ( 124 of 34011 annotated genes )	0.008634	1	Ift122, Ift172, Luzp1, Vasp, Med12, Tsc1, Tulp3, Hectd1, Lias, Sema4c, Mib1, Celsr1, Sox11, Hs2st1, Stk4, Rock2,
GO:0060828	regulation of canonical W	0.00692 ( 16 of 2312 genes )	0.00365 ( 124 of 34011 annotated genes )	0.008634	1	Dixdc1, Rspo1, Trpm4, Ankrd6, Frzb, Col1a1, Sox10, Scyl2, Tnks2, Ilk, Stk4, Ubr5, Aes, Ccny, Cyld, Dkk2,
GO:0072175	epithelial tube formation	0.00692 ( 16 of 2312 genes )	0.00365 ( 124 of 34011 annotated genes )	0.008634	1	Ift122, Ift172, Luzp1, Vasp, Med12, Tsc1, Tulp3, Hectd1, Lias, Sema4c, Mib1, Celsr1, Sox11, Hs2st1, Stk4, Rock2,
GO:0042158	lipoprotein biosynthetic	0.00433 ( 10 of 2312 genes )	0.00185 ( 63 of 34011 annotated genes )	0.00866	1	Zdhhc2, Atg10, Zdhhc1, Apobec1, Apob, Pigc, Clip3, Pigk, Pign, Pigx,
GO:0060041	retina development in cam	0.00606 ( 14 of 2312 genes )	0.00303 ( 103 of 34011 annotated genes )	0.008679	1	Megf11, Nphp1, Cnga3, Gnat2, Pdgfra, Dscam, Rpl24, Ahi1, Gnb1, Cacna1f, Bmpr1b, Crx, Tspan12, Tulp1,
GO:0033605	positive regulation of ca	0.00173 ( 4 of 2312 genes )	0.00038 ( 13 of 34011 annotated genes )	0.008754	1	Adrbk1, Slc18a1, Adora2b, Cartpt,
GO:0034505	tooth mineralization	0.00173 ( 4 of 2312 genes )	0.00038 ( 13 of 34011 annotated genes )	0.008754	1	Col1a1, Amelx, Dicer1, Fam20c,
GO:0090307	spindle assembly involved	0.00173 ( 4 of 2312 genes )	0.00038 ( 13 of 34011 annotated genes )	0.008754	1	Cltc, Flna, Mybl2, Ccdc52,
GO:2000104	negative regulation of DN	0.00173 ( 4 of 2312 genes )	0.00038 ( 13 of 34011 annotated genes )	0.008754	1	Brca2, Clspn, Stra8, Stag2,
GO:0030308	negative regulation of ce	0.00735 ( 17 of 2312 genes )	0.00397 ( 135 of 34011 annotated genes )	0.008796	1	Apbb1, Ptprj, Il7, Pparg, Inhba, Serpine2, Smarca2, Frzb, Slit2, Gnb2l1, Tro, Hyal2, Gas2l1, Ip6k2, Apbb2, Rbbp7, Ryk,
GO:0001960	negative regulation of cy	0.00216 ( 5 of 2312 genes )	0.00059 ( 20 of 34011 annotated genes )	0.008857	1	Nlrc5, Pparg, Ccl5, Slit2, Ptprf,
GO:0018022	peptidyl-lysine methylati	0.00216 ( 5 of 2312 genes )	0.00059 ( 20 of 34011 annotated genes )	0.008857	1	Suv420h1, Whsc1, Setd8, Dot1l, Mll3,
GO:0032312	regulation of ARF GTPase	0.00216 ( 5 of 2312 genes )	0.00059 ( 20 of 34011 annotated genes )	0.008857	1	Asap3, Arfgap1, Adap2, Arap2, Arap3,
GO:0070527	platelet aggregation	0.00216 ( 5 of 2312 genes )	0.00059 ( 20 of 34011 annotated genes )	0.008857	1	Itga2b, Pdgfra, Lyn, Serpine2, Itgb3,
GO:0042176	regulation of protein cat	0.00779 ( 18 of 2312 genes )	0.00429 ( 146 of 34011 annotated genes )	0.008871	1	Asb9, Wac, Dedd, Nrg1, Cul4b, Serpine2, Disc1, Gnb2l1, Faf1, Bat3, Pacsin3, Furin, Grin2c, Flna, Sgsm3, Nub1, Ptpn3, Usp44,
GO:0032313	regulation of Rab GTPase	0.00303 ( 7 of 2312 genes )	0.00106 ( 36 of 34011 annotated genes )	0.008904	1	Tbc1d15, Tbc1d5, Tbck, Sgsm1, Sgsm3, Tbc1d20, Tbc1d9,
GO:0032483	regulation of Rab protein	0.00303 ( 7 of 2312 genes )	0.00106 ( 36 of 34011 annotated genes )	0.008904	1	Tbc1d15, Tbc1d5, Tbck, Sgsm1, Sgsm3, Tbc1d20, Tbc1d9,
GO:0046834	lipid phosphorylation	0.00303 ( 7 of 2312 genes )	0.00106 ( 36 of 34011 annotated genes )	0.008904	1	Pi4k2a, Smg1, Inpp5k, Ip6k2, Pik3ca, Pik3c2g, Pikfyve,
GO:0015749	monosaccharide transport	0.00519 ( 12 of 2312 genes )	0.00244 ( 83 of 34011 annotated genes )	0.009019	1	G6pc3, Erbb3, Erbb4, Slc45a1, Prkcb, Nrg1, Slc2a3, Fgf21, Slc2a4, Clip3, Inpp5k, Prkci,
GO:0031623	receptor internalization	0.00389 ( 9 of 2312 genes )	0.00159 ( 54 of 34011 annotated genes )	0.009087	1	Rspo1, Grb2, Gtf2h2, Ghr, Ahi1, Adrbk1, Sh3gl2, Cltc, Scyl2,
GO:0008045	motor axon guidance	0.00260 ( 6 of 2312 genes )	0.00082 ( 28 of 34011 annotated genes )	0.009354	1	Alcam, Mycbp2, Chn1, Cdk5, Lhx3, Slit2,
GO:0030261	chromosome condensation	0.00260 ( 6 of 2312 genes )	0.00082 ( 28 of 34011 annotated genes )	0.009354	1	Acin1, Top2a, Ncaph2, Stra8, Smc2, Smc4,
GO:0033500	carbohydrate homeostasis	0.00606 ( 14 of 2312 genes )	0.00306 ( 104 of 34011 annotated genes )	0.009429	1	Pax6, Bhlha15, Ppp3ca, Pparg, Slc18a2, Cartpt, Fkbp1b, Vcam1, Slc2a4, Hmgn3, Inpp5k, Cacna1e, Hc, Pim3,
GO:0042593	glucose homeostasis	0.00606 ( 14 of 2312 genes )	0.00306 ( 104 of 34011 annotated genes )	0.009429	1	Pax6, Bhlha15, Ppp3ca, Pparg, Slc18a2, Cartpt, Fkbp1b, Vcam1, Slc2a4, Hmgn3, Inpp5k, Cacna1e, Hc, Pim3,
GO:0009119	ribonucleoside metabolic	0.00433 ( 10 of 2312 genes )	0.00188 ( 64 of 34011 annotated genes )	0.009664	1	Apobec1, Ocln, Aprt, Pank1, Ppcdc, Dnmt3a, Nt5c3, Umps, Dnmt3b, Pcmt1,
GO:0035725	sodium ion transmembrane	0.00433 ( 10 of 2312 genes )	0.00188 ( 64 of 34011 annotated genes )	0.009664	1	Atp1a4, Scn9a, Scn10a, Slc8a3, Scn4a, Scn3a, Slc5a7, Slc9a3, Slc9a5, Slc1a1,
GO:0001822	kidney development	0.00865 ( 20 of 2312 genes )	0.00500 ( 170 of 34011 annotated genes )	0.009993	1	Irx3, Maged1, Pdgfra, Stra6, Slit2, Itga8, Slc12a1, Tgfbr1, Agtr1a, Bat3, Aph1c, Tsc1, Bmp7, Itgb3, Ahi1, Arl3, Mpv17, Osr2, Sulf2, Sgpl1,
GO:0030278	regulation of ossificatio	0.00865 ( 20 of 2312 genes )	0.00500 ( 170 of 34011 annotated genes )	0.009993	1	Nbr1, Pdlim7, Fgfr1, Nipbl, Lect1, Gnas, Areg, Cd276, Ilk, Fam20c, Fbn2, 2410016O06Rik, Hdac4, Bmp7, Npnt, Acvr1, Bmpr1b, Ltbp3, Osr2, Sox11,
GO:0048762	mesenchymal cell differen	0.00692 ( 16 of 2312 genes )	0.00370 ( 126 of 34011 annotated genes )	0.01001	1	Efnb1, Ppp3r1, Gsk3b, Fgfr1, Sox10, Col1a1, Eomes, Tgfbr1, Erbb4, Smad2, Bmp7, Hey2, Pofut2, Flna, Acvr1, Sox11,
GO:0030324	lung development	0.00822 ( 19 of 2312 genes )	0.00467 ( 159 of 34011 annotated genes )	0.0101	1	Mycn, Ppp3r1, Pdgfra, Fgfr1, Sp3, Atp7a, Stra6, Rab3a, Celsr1, Ctsh, Cux1, Nfib, Dicer1, Bat3, Smad2, Dhcr7, Sox11, Ltbp3, Mapk8ip3,
GO:0051321	meiotic cell cycle	0.00779 ( 18 of 2312 genes )	0.00435 ( 148 of 34011 annotated genes )	0.01015	1	Brca2, Clgn, Top2a, Msh2, Tdrd9, Camk2b, Smc4, Stag2, Pms2, Rbbp8, Bat3, Piwil4, Smc2, Espl1, Xrn1, Stra8, Sgol1, Dmrt1,
GO:0071156	regulation of cell cycle	0.00779 ( 18 of 2312 genes )	0.00435 ( 148 of 34011 annotated genes )	0.01015	1	Pcid2, Wac, Csnk2a2, Top2a, Msh2, Chfr, Clspn, Rbbp8, Trp73, 5430437P03Rik, Kntc1, Chek1, Rpl24, Clock, Stra8, Ppp2r5c, Usp44, Taok1,
GO:0050885	neuromuscular process con	0.00389 ( 9 of 2312 genes )	0.00162 ( 55 of 34011 annotated genes )	0.01024	1	Tpp1, Aplp2, Cdh23, Ush1c, Abr, Nefl, Grin2c, Camk2b, Kcnma1,
GO:0006695	cholesterol biosynthetic	0.00303 ( 7 of 2312 genes )	0.00109 ( 37 of 34011 annotated genes )	0.01036	1	Srebf1, Dhcr7, Apob, Hmgcs1, Sc5d, Tm7sf2, Abcg1,
GO:0031929	TOR signaling cascade	0.00303 ( 7 of 2312 genes )	0.00109 ( 37 of 34011 annotated genes )	0.01036	1	Reln, Rptor, Ros1, Ubr1, Tsc1, Ccdc88a, Disc1,
GO:0032482	Rab protein signal transd	0.00303 ( 7 of 2312 genes )	0.00109 ( 37 of 34011 annotated genes )	0.01036	1	Tbc1d15, Tbc1d5, Tbck, Sgsm1, Sgsm3, Tbc1d20, Tbc1d9,
GO:0033993	response to lipid	0.00303 ( 7 of 2312 genes )	0.00109 ( 37 of 34011 annotated genes )	0.01036	1	Aanat, Pparg, Smad2, Pcna, Inhba, Tgfbr1, Abcg1,
GO:0048002	antigen processing and pr	0.00303 ( 7 of 2312 genes )	0.00109 ( 37 of 34011 annotated genes )	0.01036	1	Ctse, B2m, Bat3, H2-Q1, H2-DMa, H2-K1, Cd74,
GO:0071407	cellular response to orga	0.00303 ( 7 of 2312 genes )	0.00109 ( 37 of 34011 annotated genes )	0.01036	1	Ryr1, Ryr2, Pla2g4f, Pparg, Rae1, Ccl5, Casq2,
GO:0003014	renal system process	0.00346 ( 8 of 2312 genes )	0.00135 ( 46 of 34011 annotated genes )	0.01054	1	Agtr1a, Htr7, Slc9a3r1, Hsd11b2, Sulf2, Kcnma1, Aqp2, Uts2,
GO:0003229	ventricular cardiac muscl	0.00346 ( 8 of 2312 genes )	0.00135 ( 46 of 34011 annotated genes )	0.01054	1	Tnnt2, Hey2, Ryr2, Myl3, Col11a1, Dll4, Tpm1, Mybpc3,
GO:0006661	phosphatidylinositol bios	0.00346 ( 8 of 2312 genes )	0.00135 ( 46 of 34011 annotated genes )	0.01054	1	Cdipt, Pi4k2a, Pigc, Pigk, Pign, Pigx, Impa1, Plcg2,
GO:0031330	negative regulation of ce	0.00346 ( 8 of 2312 genes )	0.00135 ( 46 of 34011 annotated genes )	0.01054	1	Wac, Hdac4, Rasip1, Bat3, Furin, Ptpn3, Cpeb2, Usp44,
GO:0030326	embryonic limb morphogene	0.00649 ( 15 of 2312 genes )	0.00341 ( 116 of 34011 annotated genes )	0.01057	1	Ift122, Mycn, Tmem107, Dicer1, Aff3, Fgfr1, Tulp3, Bmp7, Nipbl, Gnas, Fbxw4, Dync2h1, Fbn2, Osr2, Alx4,
GO:0030336	negative regulation of ce	0.00649 ( 15 of 2312 genes )	0.00341 ( 116 of 34011 annotated genes )	0.01057	1	Ptprj, Dll4, Arap3, Vash1, Slit2, Ptpru, Klf4, Slc9a3r1, Abr, Rras, Krit1, Ilk, Hc, Muc2, Hyal2,
GO:0035113	embryonic appendage morph	0.00649 ( 15 of 2312 genes )	0.00341 ( 116 of 34011 annotated genes )	0.01057	1	Ift122, Mycn, Tmem107, Dicer1, Aff3, Fgfr1, Tulp3, Bmp7, Nipbl, Gnas, Fbxw4, Dync2h1, Fbn2, Osr2, Alx4,
GO:0048638	regulation of development	0.00649 ( 15 of 2312 genes )	0.00341 ( 116 of 34011 annotated genes )	0.01057	1	Erbb4, Trpv2, Tnfrsf12a, Dscam, Nrg1, Fgfr1, Mapt, Nipbl, Agrn, Disc1, Hey2, Ilk, 2400003C14Rik, Sema7a, Ryk,
GO:0008629	induction of apoptosis by	0.00433 ( 10 of 2312 genes )	0.00191 ( 65 of 34011 annotated genes )	0.01075	1	Map3k5, Brca2, Ercc6, Trp73, Bat3, Ryr2, Msh2, Jak2, Ppp2r5c, Zfp622,
GO:0030330	DNA damage response, sign	0.00433 ( 10 of 2312 genes )	0.00191 ( 65 of 34011 annotated genes )	0.01075	1	Brca2, Myo6, Trp73, Bat3, Setd8, Ankrd1, Msh2, Rps6ka6, Ppp2r5c, Cd74,
GO:0016052	carbohydrate catabolic pr	0.00692 ( 16 of 2312 genes )	0.00373 ( 127 of 34011 annotated genes )	0.01077	1	Naga, Pglyrp3, Hdac4, Dhdh, Pgls, Ppp1r3b, Lyve1, Sord, Pygm, Aldob, Ppp1cb, Ppp1r3c, Pdhb, Hyal2, Dhtkd1, Pfkfb2,
GO:0009743	response to carbohydrate	0.00519 ( 12 of 2312 genes )	0.00250 ( 85 of 34011 annotated genes )	0.01084	1	Apob, Ppp3ca, Smad2, Prkcb, Fkbp1b, Vcam1, Eif2b4, Hmgn3, Srebf1, Cacna1e, Pfkfb2, Pim3,
GO:0071901	negative regulation of pr	0.00519 ( 12 of 2312 genes )	0.00250 ( 85 of 34011 annotated genes )	0.01084	1	Ptprj, Ptpn6, Trp73, Chordc1, Gsk3b, Bmp7, Hipk3, Inpp5k, Wnk1, Rgs14, Lyn, Hyal2,
GO:0022411	cellular component disass	0.00735 ( 17 of 2312 genes )	0.00406 ( 138 of 34011 annotated genes )	0.01085	1	Acin1, Nrg1, Top2a, Capza2, Aqp2, Etf1, Evl, Shroom2, Gas2l1, Sgk1, Smarce1, Kif5b, Smarcc1, Mtrf1l, Tpm1, Spna2, Clasp1,
GO:0002478	antigen processing and pr	0.00216 ( 5 of 2312 genes )	0.00062 ( 21 of 34011 annotated genes )	0.011	1	Ctse, B2m, H2-DMa, H2-K1, Cd74,
GO:0043043	peptide biosynthetic proc	0.00216 ( 5 of 2312 genes )	0.00062 ( 21 of 34011 annotated genes )	0.011	1	Dmd, Gclm, Furin, Bdh2, Pcsk1,
GO:0009725	response to hormone stimu	0.01730 ( 40 of 2312 genes )	0.01205 ( 410 of 34011 annotated genes )	0.011	1	Pparg, Prkcb, Inhba, Eif2b4, Areg, Ash2l, Atp2a2, Kcnma1, Ptprf, Sgk1, Grb2, Agtr1a, Tsc1, Tat, Sord, Aldob, Rora, Anxa1, Cuzd1, Prkci, Cpn1, Aanat, Naip2, Ghr, Serpina3c, Slc2a4, Srebf1, Inpp5k, Jak2, Rorb, Tgfbr1, Pxn, Bmp7, Htr7, Fert2, Smarcc1, Retn, Hadha, Mll2, Lyn,
GO:0006066	alcohol metabolic process	0.01990 ( 46 of 2312 genes )	0.01426 ( 485 of 34011 annotated genes )	0.01106	1	Dio2, Chst2, Pck2, Pgls, Gdpd4, Otog, Sc5d, Abca2, Impa1, Soat1, Hdac4, Apob, Dhdh, Ugp2, Gnpda2, Sord, Aldob, Hmgcs1, Pik3ca, Ppp1r3c, Dhtkd1, Pfkfb2, Dhrs4, Ebpl, Atp7a, Dak, Reln, Srebf1, Ppp1cb, Inpp5k, Lepr, Slc5a7, Tm7sf2, Man2b1, G6pc3, Ppp1r3b, Degs2, Aplp2, Gpcpd1, Acer3, Dhcr7, Pon1, Pofut2, Pdhb, Abcg1, Kcnj6,
GO:0002683	negative regulation of im	0.00908 ( 21 of 2312 genes )	0.00538 ( 183 of 34011 annotated genes )	0.01107	1	Ptprj, Vtcn1, Gm885, Tarbp2, Slit2, Ctla4, Abr, Cd276, Cnr2, Ptpn6, Mill2, Pglyrp3, Hmgb3, Col3a1, Peli1, Fert2, Cr1l, Lyn, Hc, Sox11, Cd74,
GO:0006692	prostanoid metabolic proc	0.00260 ( 6 of 2312 genes )	0.00085 ( 29 of 34011 annotated genes )	0.01114	1	Tnfrsf1a, Pla2g4f, Anxa1, 2810405K02Rik, Cd74, Ptgr2,
GO:0006693	prostaglandin metabolic p	0.00260 ( 6 of 2312 genes )	0.00085 ( 29 of 34011 annotated genes )	0.01114	1	Tnfrsf1a, Pla2g4f, Anxa1, 2810405K02Rik, Cd74, Ptgr2,
GO:0021795	cerebral cortex cell migr	0.00260 ( 6 of 2312 genes )	0.00085 ( 29 of 34011 annotated genes )	0.01114	1	Reln, Dixdc1, Cdk5, Fgfr1, Slit2, Disc1,
GO:0042471	ear morphogenesis	0.00649 ( 15 of 2312 genes )	0.00344 ( 117 of 34011 annotated genes )	0.01139	1	Myo6, Gjb6, Col11a1, Fgfr1, Tmie, Otx1, Frzb, Nipbl, Cdh23, Ush1c, Abr, Celsr1, Sobp, Itga8, Osr2,
GO:0030323	respiratory tube developm	0.00822 ( 19 of 2312 genes )	0.00473 ( 161 of 34011 annotated genes )	0.01146	1	Mycn, Ppp3r1, Pdgfra, Fgfr1, Sp3, Atp7a, Stra6, Rab3a, Celsr1, Ctsh, Cux1, Nfib, Dicer1, Bat3, Smad2, Dhcr7, Sox11, Ltbp3, Mapk8ip3,
GO:0007422	peripheral nervous system	0.00389 ( 9 of 2312 genes )	0.00165 ( 56 of 34011 annotated genes )	0.01149	1	Dmd, Lgi4, Erbb3, Onecut2, Nrg1, Cdk5, Sox10, Gpc1, Ntrk2,
GO:0042991	transcription factor impo	0.00389 ( 9 of 2312 genes )	0.00165 ( 56 of 34011 annotated genes )	0.01149	1	Ppp3r1, Tacc3, Rbck1, Cd36, Gsk3b, Faf1, Flna, Cyld, Fbxw11,
GO:0021915	neural tube development	0.00779 ( 18 of 2312 genes )	0.00441 ( 150 of 34011 annotated genes )	0.01158	1	Ift122, Ift172, Vasp, Tmem107, Tulp3, Hectd1, Celsr1, Hes5, Stk4, Pax6, Luzp1, Tsc1, Med12, Lias, Sema4c, Mib1, Sox11, Rock2,
GO:0009991	response to extracellular	0.01081 ( 25 of 2312 genes )	0.00676 ( 230 of 34011 annotated genes )	0.01158	1	Wac, Nbr1, Dspp, Wrn, Klf4, Srebf1, Ctsh, Atg3, Ltk, Aqp2, Mill2, Slc39a4, Rptor, Aes, Gas2l1, Mll5, Igf2r, Adora2b, Gdap2, Mapt, Gcg, Cartpt, Alb, Lyn, Stra8,
GO:0010224	response to UV-B	0.00173 ( 4 of 2312 genes )	0.00041 ( 14 of 34011 annotated genes )	0.01161	1	Ercc6, Msh2, Il12a, Hyal2,
GO:0046856	phosphatidylinositol deph	0.00173 ( 4 of 2312 genes )	0.00041 ( 14 of 34011 annotated genes )	0.01161	1	Sacm1l, Ocrl, Inpp5k, Inpp4b,
GO:0070536	protein K63-linked deubiq	0.00173 ( 4 of 2312 genes )	0.00041 ( 14 of 34011 annotated genes )	0.01161	1	Usp8, Usp20, Cyld, 5430437P03Rik,
GO:0060541	respiratory system develo	0.00908 ( 21 of 2312 genes )	0.00541 ( 184 of 34011 annotated genes )	0.01173	1	Mycn, Ppp3r1, Pdgfra, Fgfr1, Sp3, Atp7a, Tulp3, Stra6, Rab3a, Celsr1, Ctsh, Cux1, Nfib, Dicer1, Bat3, Smad2, Dhcr7, Hydin, Sox11, Ltbp3, Mapk8ip3,
GO:0042770	signal transduction in re	0.00519 ( 12 of 2312 genes )	0.00253 ( 86 of 34011 annotated genes )	0.01186	1	Brca2, Ercc6, Myo6, Trp73, Grb2, Bat3, Setd8, Ankrd1, Msh2, Rps6ka6, Ppp2r5c, Cd74,
GO:0051224	negative regulation of pr	0.00519 ( 12 of 2312 genes )	0.00253 ( 86 of 34011 annotated genes )	0.01186	1	Tacc3, Cd36, Cdk5, Gsk3b, Bard1, Inpp5k, Wwp2, Faf1, Flna, Anxa1, Cyld, Fbxw11,
GO:0015844	monoamine transport	0.00433 ( 10 of 2312 genes )	0.00194 ( 66 of 34011 annotated genes )	0.01194	1	Slc18a1, Adora2b, Slc18a2, Prkcb, Xbp1, Cartpt, Htr7, Adrbk1, Slc22a1, Hc,
GO:0060415	muscle tissue morphogenes	0.00433 ( 10 of 2312 genes )	0.00194 ( 66 of 34011 annotated genes )	0.01194	1	Myl3, Col11a1, Dll4, Col3a1, Ankrd1, Tnnt2, Ryr2, Hey2, Mybpc3, Tpm1,
GO:0031960	response to corticosteroi	0.00346 ( 8 of 2312 genes )	0.00138 ( 47 of 34011 annotated genes )	0.01198	1	Areg, Cpn1, Sgk1, Agtr1a, Anxa1, Kcnma1, Tat, Htr7,
GO:0042509	regulation of tyrosine ph	0.00346 ( 8 of 2312 genes )	0.00138 ( 47 of 34011 annotated genes )	0.01198	1	Tnfrsf1a, Erbb4, Ccl5, Csf1r, Jak2, Lyn, Il12a, Hes5,
GO:0002792	negative regulation of pe	0.00303 ( 7 of 2312 genes )	0.00112 ( 38 of 34011 annotated genes )	0.01198	1	Srebf1, Ppp3ca, Cartpt, Cd74, Fkbp1b, Uts2, Pim3,
GO:0030317	sperm motility	0.00303 ( 7 of 2312 genes )	0.00112 ( 38 of 34011 annotated genes )	0.01198	1	Catsper4, Atp1a4, Apob, Catsper2, Cacna1e, Catsper1, Sord,
GO:0043487	regulation of RNA stabili	0.00303 ( 7 of 2312 genes )	0.00112 ( 38 of 34011 annotated genes )	0.01198	1	Pcid2, Elavl1, Apobec1, Carhsp1, Igf2bp1, Rbm10, Dhx9,
GO:0060324	face development	0.00303 ( 7 of 2312 genes )	0.00112 ( 38 of 34011 annotated genes )	0.01198	1	Asph, Cdk2ap1, Col1a1, Pdgfra, Nipbl, Sgpl1, Stra6,
GO:0002695	negative regulation of le	0.00606 ( 14 of 2312 genes )	0.00315 ( 107 of 34011 annotated genes )	0.01199	1	Ptpn6, Vtcn1, Gm885, Pglyrp3, Hmgb3, Fert2, Peli1, Ctla4, Abr, Lyn, Cd276, Sox11, Cnr2, Cd74,
GO:0016072	rRNA metabolic process	0.00606 ( 14 of 2312 genes )	0.00315 ( 107 of 34011 annotated genes )	0.01199	1	Rpf1, Tfb2m, Rpl5, Rcl1, Rps28, Xrn1, Exosc8, Utp14a, Isg20, Exosc3, Exosc5, Utp6, Nol9, Exosc9,
GO:0043433	negative regulation of tr	0.00606 ( 14 of 2312 genes )	0.00315 ( 107 of 34011 annotated genes )	0.01199	1	Rps3, Hdac4, Rbck1, Hr, Traf3, Nlrc5, Peli1, Klf4, Wwp2, Flna, Glis2, Cyld, Usp7, Pex14,
GO:0090048	negative regulation of tr	0.00606 ( 14 of 2312 genes )	0.00315 ( 107 of 34011 annotated genes )	0.01199	1	Rps3, Hdac4, Rbck1, Hr, Traf3, Nlrc5, Peli1, Klf4, Wwp2, Flna, Glis2, Cyld, Usp7, Pex14,
GO:0007623	circadian rhythm	0.00476 ( 11 of 2312 genes )	0.00223 ( 76 of 34011 annotated genes )	0.01202	1	Aanat, Creb1, Per1, Cartpt, Htr7, Dhx9, Clock, Alb, Fbxw11, Kcnma1, Uts2,
GO:2000146	negative regulation of ce	0.00649 ( 15 of 2312 genes )	0.00347 ( 118 of 34011 annotated genes )	0.01227	1	Ptprj, Dll4, Arap3, Vash1, Slit2, Ptpru, Klf4, Slc9a3r1, Abr, Rras, Krit1, Ilk, Hc, Muc2, Hyal2,
GO:0055001	muscle cell development	0.00779 ( 18 of 2312 genes )	0.00444 ( 151 of 34011 annotated genes )	0.01235	1	Pdgfra, Ppp3ca, Neb, Boc, Cacna1s, Dok7, Ilk, Nfatc4, Dmd, Hdac4, Dicer1, Agrn, Ryr1, Tnnt2, Hey2, Itgb1, Mybpc3, Tpm1,
GO:0006842	tricarboxylic acid transp	0.00087 ( 2 of 2312 genes )	0.00009 ( 3 of 34011 annotated genes )	0.01282	1	Sfxn5, Slc13a5,
GO:0007161	calcium-independent cell-	0.00087 ( 2 of 2312 genes )	0.00009 ( 3 of 34011 annotated genes )	0.01282	1	Itgb1, Vwa2,
GO:0015014	heparan sulfate proteogly	0.00087 ( 2 of 2312 genes )	0.00009 ( 3 of 34011 annotated genes )	0.01282	1	Ext2, Hs2st1,
GO:0015746	citrate transport	0.00087 ( 2 of 2312 genes )	0.00009 ( 3 of 34011 annotated genes )	0.01282	1	Sfxn5, Slc13a5,
GO:0021823	cerebral cortex tangentia	0.00087 ( 2 of 2312 genes )	0.00009 ( 3 of 34011 annotated genes )	0.01282	1	Fgfr1, Slit2,
GO:0021825	substrate-dependent cereb	0.00087 ( 2 of 2312 genes )	0.00009 ( 3 of 34011 annotated genes )	0.01282	1	Fgfr1, Slit2,
GO:0021827	postnatal olfactory bulb	0.00087 ( 2 of 2312 genes )	0.00009 ( 3 of 34011 annotated genes )	0.01282	1	Fgfr1, Slit2,
GO:0030007	cellular potassium ion ho	0.00087 ( 2 of 2312 genes )	0.00009 ( 3 of 34011 annotated genes )	0.01282	1	Bsnd, Kcnma1,
GO:0030263	apoptotic chromosome cond	0.00087 ( 2 of 2312 genes )	0.00009 ( 3 of 34011 annotated genes )	0.01282	1	Acin1, Top2a,
GO:0030422	production of siRNA invol	0.00087 ( 2 of 2312 genes )	0.00009 ( 3 of 34011 annotated genes )	0.01282	1	Dicer1, Tarbp2,
GO:0030423	targeting of mRNA for des	0.00087 ( 2 of 2312 genes )	0.00009 ( 3 of 34011 annotated genes )	0.01282	1	Dicer1, Tarbp2,
GO:0035674	tricarboxylic acid transm	0.00087 ( 2 of 2312 genes )	0.00009 ( 3 of 34011 annotated genes )	0.01282	1	Sfxn5, Slc13a5,
GO:0043633	polyadenylation-dependent	0.00087 ( 2 of 2312 genes )	0.00009 ( 3 of 34011 annotated genes )	0.01282	1	Pnpt1, Exosc9,
GO:0050904	diapedesis	0.00087 ( 2 of 2312 genes )	0.00009 ( 3 of 34011 annotated genes )	0.01282	1	Fert2, Ccl5,
GO:0060448	dichotomous subdivision o	0.00087 ( 2 of 2312 genes )	0.00009 ( 3 of 34011 annotated genes )	0.01282	1	Celsr1, Ctsh,
GO:0071671	regulation of smooth musc	0.00087 ( 2 of 2312 genes )	0.00009 ( 3 of 34011 annotated genes )	0.01282	1	Lpar1, Slit2,
GO:0071679	commissural neuron axon g	0.00087 ( 2 of 2312 genes )	0.00009 ( 3 of 34011 annotated genes )	0.01282	1	Nfib, Ryk,
GO:0090116	C-5 methylation of cytosi	0.00087 ( 2 of 2312 genes )	0.00009 ( 3 of 34011 annotated genes )	0.01282	1	Dnmt3a, Dnmt3b,
GO:0090310	negative regulation of me	0.00087 ( 2 of 2312 genes )	0.00009 ( 3 of 34011 annotated genes )	0.01282	1	Tet1, Apobec1,
GO:0009612	response to mechanical st	0.00389 ( 9 of 2312 genes )	0.00168 ( 57 of 34011 annotated genes )	0.01286	1	Etv1, Col11a1, Cd36, Serpine2, Ankrd1, Stra6, Htr7, Strbp, Habp4,
GO:0030500	regulation of bone minera	0.00389 ( 9 of 2312 genes )	0.00168 ( 57 of 34011 annotated genes )	0.01286	1	Nbr1, Bmp7, Bmpr1b, Cd276, Acvr1, Fam20c, Osr2, Fbn2, Ltbp3,
GO:0055008	cardiac muscle tissue mor	0.00389 ( 9 of 2312 genes )	0.00168 ( 57 of 34011 annotated genes )	0.01286	1	Myl3, Col11a1, Dll4, Ankrd1, Tnnt2, Ryr2, Hey2, Mybpc3, Tpm1,
GO:0010212	response to ionizing radi	0.00519 ( 12 of 2312 genes )	0.00256 ( 87 of 34011 annotated genes )	0.01294	1	Ino80, Brca2, Ercc6, Apobec1, Trp73, Grb2, 5430437P03Rik, Nipbl, Msh2, Clock, Trp53bp2, Lrp2,
GO:0000183	chromatin silencing at rD	0.00130 ( 3 of 2312 genes )	0.00024 ( 8 of 34011 annotated genes )	0.01297	1	Ubtf, Phf8, Baz2a,
GO:0031440	regulation of mRNA 3'-end	0.00130 ( 3 of 2312 genes )	0.00024 ( 8 of 34011 annotated genes )	0.01297	1	Ncbp1, Ahcyl1, Cdc73,
GO:0032026	response to magnesium ion	0.00130 ( 3 of 2312 genes )	0.00024 ( 8 of 34011 annotated genes )	0.01297	1	Ryr2, Cnga3, Plcg2,
GO:0032222	regulation of synaptic tr	0.00130 ( 3 of 2312 genes )	0.00024 ( 8 of 34011 annotated genes )	0.01297	1	Camk2b, Uts2, Lama2,
GO:0033004	negative regulation of ma	0.00130 ( 3 of 2312 genes )	0.00024 ( 8 of 34011 annotated genes )	0.01297	1	Fert2, Gm885, Cnr2,
GO:0034331	cell junction maintenance	0.00130 ( 3 of 2312 genes )	0.00024 ( 8 of 34011 annotated genes )	0.01297	1	Shroom2, Csf1r, Plekha7,
GO:0061081	positive regulation of my	0.00130 ( 3 of 2312 genes )	0.00024 ( 8 of 34011 annotated genes )	0.01297	1	Cd36, Sema7a, Cd74,
GO:0070166	enamel mineralization	0.00130 ( 3 of 2312 genes )	0.00024 ( 8 of 34011 annotated genes )	0.01297	1	Amelx, Dicer1, Fam20c,
GO:0001578	microtubule bundle format	0.00260 ( 6 of 2312 genes )	0.00088 ( 30 of 34011 annotated genes )	0.01315	1	Ift46, Ttll1, Gas2l1, Nav1, Spast, Clasp1,
GO:0009395	phospholipid catabolic pr	0.00260 ( 6 of 2312 genes )	0.00088 ( 30 of 34011 annotated genes )	0.01315	1	Pla2g4d, Plcg1, Plcb3, Pla2g4f, Smpdl3a, Plcg2,
GO:0051568	histone H3-K4 methylation	0.00260 ( 6 of 2312 genes )	0.00088 ( 30 of 34011 annotated genes )	0.01315	1	Mll1, Ash2l, Mll5, Mll2, Dnmt3b, Mll3,
GO:0009116	nucleoside metabolic proc	0.00476 ( 11 of 2312 genes )	0.00226 ( 77 of 34011 annotated genes )	0.0132	1	Apobec1, Ocln, AI314976, Aprt, Pank1, Ppcdc, Dnmt3a, Nt5c3, Umps, Dnmt3b, Pcmt1,
GO:0007254	JNK cascade	0.00735 ( 17 of 2312 genes )	0.00415 ( 141 of 34011 annotated genes )	0.01327	1	Dixdc1, Ercc6, Map3k1, Map4k4, Traf2, Mink1, Fktn, Zfp622, Map3k5, Gab1, Trp73, Hipk3, Spag9, Sh3rf1, Mapk8ip3, Magi3, Taok1,
GO:0014009	glial cell proliferation	0.00216 ( 5 of 2312 genes )	0.00065 ( 22 of 34011 annotated genes )	0.01346	1	Areg, Dicer1, Lyn, Prkci, Sox11,
GO:0035329	hippo signaling cascade	0.00216 ( 5 of 2312 genes )	0.00065 ( 22 of 34011 annotated genes )	0.01346	1	Tead1, Amot, Mobkl1a, Sox11, Stk4,
GO:0042771	DNA damage response, sign	0.00216 ( 5 of 2312 genes )	0.00065 ( 22 of 34011 annotated genes )	0.01346	1	Brca2, Msh2, Trp73, Bat3, Ppp2r5c,
GO:0046677	response to antibiotic	0.00216 ( 5 of 2312 genes )	0.00065 ( 22 of 34011 annotated genes )	0.01346	1	Scn3a, Ciita, Pla2g4f, Jak2, Jak1,
GO:0048596	embryonic camera-type eye	0.00216 ( 5 of 2312 genes )	0.00065 ( 22 of 34011 annotated genes )	0.01346	1	Frs2, Pax6, Sp3, Bmp7, Stra6,
GO:0070373	negative regulation of ER	0.00216 ( 5 of 2312 genes )	0.00065 ( 22 of 34011 annotated genes )	0.01346	1	Klf4, Slc9a3r1, Lyn, Rgs14, Rps6ka6,
GO:0072595	maintenance of protein lo	0.00216 ( 5 of 2312 genes )	0.00065 ( 22 of 34011 annotated genes )	0.01346	1	Os9, Sun2, Taf8, Fbn2, Morc3,
GO:0031032	actomyosin structure orga	0.00346 ( 8 of 2312 genes )	0.00141 ( 48 of 34011 annotated genes )	0.01355	1	Pdgfra, Cdc42bpa, Neb, Tnnt2, Limch1, Itgb1, Mybpc3, Tpm1,
GO:0090263	positive regulation of ca	0.00346 ( 8 of 2312 genes )	0.00141 ( 48 of 34011 annotated genes )	0.01355	1	Ubr5, Dixdc1, Rspo1, Trpm4, Col1a1, Tnks2, Ilk, Dkk2,
GO:0001764	neuron migration	0.00562 ( 13 of 2312 genes )	0.00288 ( 98 of 34011 annotated genes )	0.01357	1	Apbb1, Pax6, Apbb2, Cdk5, Mapt, Dclk1, Disc1, Reln, Fktn, Nav1, Celsr1, Ntrk2, Mark2,
GO:0006323	DNA packaging	0.00562 ( 13 of 2312 genes )	0.00288 ( 98 of 34011 annotated genes )	0.01357	1	D6Mm5e, Acin1, Ncaph2, Ctcf, Smc2, Smarca2, Top2a, Smarcc1, Hells, Stra8, Rsf1, Smc4, Baz2a,
GO:0051129	negative regulation of ce	0.01298 ( 30 of 2312 genes )	0.00861 ( 293 of 34011 annotated genes )	0.01368	1	Terf2ip, Pcid2, Map3k1, Apobec1, Prtn3, Gsk3b, Slit2, Clip3, Inpp5k, Gnb2l1, Capza2, Arhgef15, Ptprf, Evl, Shroom2, Tet1, Gas2l1, Lpar1, Sgk1, Chek1, Pacsin3, Bmp7, Hey2, Itgb1, Dnmt3b, Ryk, Spna2, Tpm1, Clasp1, Usp44,
GO:0000272	polysaccharide catabolic	0.00303 ( 7 of 2312 genes )	0.00115 ( 39 of 34011 annotated genes )	0.01378	1	Pygm, Ppp1cb, Pglyrp3, Ppp1r3b, Ppp1r3c, Lyve1, Hyal2,
GO:0003007	heart morphogenesis	0.00908 ( 21 of 2312 genes )	0.00550 ( 187 of 34011 annotated genes )	0.01391	1	Col11a1, Col5a1, Dll4, Nipbl, Ephb4, Tead1, Pbrm1, Whsc1, Myl3, Ankrd1, Ahi1, Ryr1, Tnnt2, Ryr2, Hey2, Mib1, Rbm15, Acvr1, Sox11, Mybpc3, Tpm1,
GO:0031669	cellular response to nutr	0.00606 ( 14 of 2312 genes )	0.00320 ( 109 of 34011 annotated genes )	0.01397	1	Wac, Slc39a4, Rptor, Gas2l1, Nbr1, Mll5, Wrn, Cartpt, Srebf1, Alb, Atg3, Lyn, Stra8, Ltk,
GO:0016331	morphogenesis of embryoni	0.00779 ( 18 of 2312 genes )	0.00450 ( 153 of 34011 annotated genes )	0.01401	1	Ift122, Ift172, Vasp, Tulp3, Hectd1, Jag2, Celsr1, Hs2st1, Stk4, Luzp1, Tsc1, Med12, Bmp7, Lias, Sema4c, Mib1, Sox11, Rock2,
GO:0001508	regulation of action pote	0.00735 ( 17 of 2312 genes )	0.00418 ( 142 of 34011 annotated genes )	0.01417	1	Lgi4, Dpp6, Mpdz, Eif2b4, Cldn5, Ilk, Cnr2, Hes5, Kcnma1, Dicer1, Scn9a, Qk, Tsc1, Scn3a, Gpc1, Jam3, Gnpat,
GO:0043161	proteasomal ubiquitin-dep	0.00735 ( 17 of 2312 genes )	0.00418 ( 142 of 34011 annotated genes )	0.01417	1	Wac, Skp1a, Cul1, Rnf103, Ube2w, Gnb2l1, Hsp90b1, Bat3, Rbck1, Rnf187, Cd2ap, Wwp2, Os9, Usp44, Nub1, Fbxw11, Ppp2r5c,
GO:0090092	regulation of transmembra	0.00735 ( 17 of 2312 genes )	0.00418 ( 142 of 34011 annotated genes )	0.01417	1	Inhba, Htra3, Ilk, Itga8, Fbn2, Hes5, Tgfbr1, Onecut2, Smad2, Bmp7, Npnt, Furin, Adamtsl2, Acvr1, Sox11, Rbpms, Zfp423,
GO:0003205	cardiac chamber developme	0.00649 ( 15 of 2312 genes )	0.00353 ( 120 of 34011 annotated genes )	0.01418	1	Luzp1, Myl3, Col11a1, Dll4, Stra6, Frs2, Tnnt2, Ryr2, Hey2, Acvr1, Rbm15, Whsc1, Sox11, Mybpc3, Tpm1,
GO:0007596	blood coagulation	0.00649 ( 15 of 2312 genes )	0.00353 ( 120 of 34011 annotated genes )	0.01418	1	Ptprj, Proz, Fhad1, Pdgfra, Gna13, Rab27a, Cd36, Serpine2, Itgb3, Itga2b, Otog, Hps5, Lyn, Evl, Tfpi,
GO:0035148	tube formation	0.00692 ( 16 of 2312 genes )	0.00385 ( 131 of 34011 annotated genes )	0.01423	1	Ift122, Ift172, Luzp1, Vasp, Med12, Tsc1, Tulp3, Hectd1, Lias, Sema4c, Mib1, Celsr1, Sox11, Hs2st1, Stk4, Rock2,
GO:0006952	defense response	0.02898 ( 67 of 2312 genes )	0.02246 ( 764 of 34011 annotated genes )	0.01452	1	Pparg, Map2k3, Isg20, Cnr2, Map3k5, Ptpn6, Scn9a, Adora2b, Agtr1a, Klrg1, Plac8, Fabp4, Hc, Anxa1, Mx1, H2-K1, Afap1l2, Slit2, Nlrc5, Cd163, Hyal2, Nlrx1, Trp73, Ccl5, Lias, Nlrp1a, Lyn, Serpinf1, Il12a, Cd74, Tbk1, Chst2, Ciita, Tarbp2, Mpo, Abr, Cd276, Sema7a, Lyz2, Mill2, Pglyrp3, Rab27a, Traf3, Peli1, Cr1l, Csf1r, Jam3, Il27, Oas3, Tnfrsf1a, Apobec1, B2m, Oasl1, Polr3h, Cd36, Jak2, Exosc5, To…
GO:0002062	chondrocyte differentiati	0.00433 ( 10 of 2312 genes )	0.00200 ( 68 of 34011 annotated genes )	0.01459	1	Nfib, Col11a1, Fgfr1, Sox5, Mef2d, Col11a2, Osr2, Ltbp3, Sulf2, Tgfbr1,
GO:0046425	regulation of JAK-STAT ca	0.00433 ( 10 of 2312 genes )	0.00200 ( 68 of 34011 annotated genes )	0.01459	1	Tnfrsf1a, Erbb4, Ccl5, Ghr, Csf1r, Jak2, Lyn, Il12a, Dot1l, Hes5,
GO:0050806	positive regulation of sy	0.00433 ( 10 of 2312 genes )	0.00200 ( 68 of 34011 annotated genes )	0.01459	1	Erbb4, Serpine2, Htr7, Gria4, Reln, Rgs14, Camk2b, Ntrk2, Lama2, Uts2,
GO:0031647	regulation of protein sta	0.00562 ( 13 of 2312 genes )	0.00291 ( 99 of 34011 annotated genes )	0.0147	1	Apbb1, Creb1, Apbb2, Bat3, Tsc1, Cdc73, Ift46, Ctsh, Flna, Ccdc88c, Fbxw11, Usp7, Morc3,
GO:0044275	cellular carbohydrate cat	0.00562 ( 13 of 2312 genes )	0.00291 ( 99 of 34011 annotated genes )	0.0147	1	Naga, Hdac4, Dhdh, Pgls, Ppp1r3b, Sord, Pygm, Aldob, Ppp1cb, Ppp1r3c, Pdhb, Dhtkd1, Pfkfb2,
GO:0010575	positive regulation vascu	0.00173 ( 4 of 2312 genes )	0.00044 ( 15 of 34011 annotated genes )	0.01501	1	Adora2b, Hc, Sulf2, Arnt,
GO:0010658	striated muscle cell apop	0.00173 ( 4 of 2312 genes )	0.00044 ( 15 of 34011 annotated genes )	0.01501	1	Gnb1, Hey2, Ilk, Nrg1,
GO:0010659	cardiac muscle cell apopt	0.00173 ( 4 of 2312 genes )	0.00044 ( 15 of 34011 annotated genes )	0.01501	1	Gnb1, Hey2, Ilk, Nrg1,
GO:0010762	regulation of fibroblast	0.00173 ( 4 of 2312 genes )	0.00044 ( 15 of 34011 annotated genes )	0.01501	1	Fert2, Hyal2, Itgb3, Uts2,
GO:0030201	heparan sulfate proteogly	0.00173 ( 4 of 2312 genes )	0.00044 ( 15 of 34011 annotated genes )	0.01501	1	Ext2, Gpc1, Sulf2, Hs2st1,
GO:0034390	smooth muscle cell apopto	0.00173 ( 4 of 2312 genes )	0.00044 ( 15 of 34011 annotated genes )	0.01501	1	Pde1a, Agtr1a, Il12a, Rbm10,
GO:0034391	regulation of smooth musc	0.00173 ( 4 of 2312 genes )	0.00044 ( 15 of 34011 annotated genes )	0.01501	1	Pde1a, Agtr1a, Il12a, Rbm10,
GO:0050775	positive regulation of de	0.00173 ( 4 of 2312 genes )	0.00044 ( 15 of 34011 annotated genes )	0.01501	1	Sgk1, Ilk, Ptprd, Ptprf,
GO:0090162	establishment of epitheli	0.00173 ( 4 of 2312 genes )	0.00044 ( 15 of 34011 annotated genes )	0.01501	1	Cyth1, Fbf1, Pard3, Fermt1,
GO:0030162	regulation of proteolysis	0.00952 ( 22 of 2312 genes )	0.00588 ( 200 of 34011 annotated genes )	0.01503	1	Serpina1f, Wac, Serpine2, Disc1, Ide, Serpina3c, Gnb2l1, 5033414D02Rik, Bat3, Pacsin3, Serpina3b, Serpinb12, Traf3, Serpinb1c, Cr1l, Serpinf1, Ptpn3, Spink5, Fbxw11, Nub1, Usp44, C6,
GO:0035303	regulation of dephosphory	0.00606 ( 14 of 2312 genes )	0.00323 ( 110 of 34011 annotated genes )	0.01505	1	Ppp1r12a, Fkbp15, Lmtk3, Hsp90b1, Csrnp2, Sh3rf2, Tsc1, Fkbp1b, Npnt, Inpp5k, Wnk1, Elfn2, Jak2, Sytl2,
GO:0007599	hemostasis	0.00649 ( 15 of 2312 genes )	0.00356 ( 121 of 34011 annotated genes )	0.01521	1	Ptprj, Proz, Fhad1, Pdgfra, Gna13, Rab27a, Cd36, Serpine2, Itgb3, Itga2b, Otog, Hps5, Lyn, Evl, Tfpi,
GO:0032868	response to insulin stimu	0.00649 ( 15 of 2312 genes )	0.00356 ( 121 of 34011 annotated genes )	0.01521	1	Aanat, Sgk1, Pparg, Grb2, Prkcb, Tsc1, Fert2, Slc2a4, Srebf1, Inpp5k, Smarcc1, Retn, Hadha, Prkci, Ptprf,
GO:0040013	negative regulation of lo	0.00692 ( 16 of 2312 genes )	0.00388 ( 132 of 34011 annotated genes )	0.01522	1	Ptprj, Dll4, Arap3, Vash1, Slit2, Klf4, Slc9a3r1, Abr, Rras, Krit1, Ilk, Muc2, Hyal2, Ptpru, Hc, Ryk,
GO:0032273	positive regulation of pr	0.00346 ( 8 of 2312 genes )	0.00144 ( 49 of 34011 annotated genes )	0.01527	1	Fert2, Map3k1, Grb2, Kirrel, Jmy, Mapt, Arpc2, Evl,
GO:0045861	negative regulation of pr	0.00346 ( 8 of 2312 genes )	0.00144 ( 49 of 34011 annotated genes )	0.01527	1	Wac, Bat3, Serpine2, Ide, Cr1l, Spink5, Ptpn3, Usp44,
GO:0030042	actin filament depolymeri	0.00260 ( 6 of 2312 genes )	0.00091 ( 31 of 34011 annotated genes )	0.01541	1	Shroom2, Capza2, Tpm1, Spna2, Aqp2, Evl,
GO:0031076	embryonic camera-type eye	0.00260 ( 6 of 2312 genes )	0.00091 ( 31 of 34011 annotated genes )	0.01541	1	Frs2, Pax6, Sp3, Tulp3, Bmp7, Stra6,
GO:0051591	response to cAMP	0.00260 ( 6 of 2312 genes )	0.00091 ( 31 of 34011 annotated genes )	0.01541	1	Pygm, Duox1, Aanat, Inpp5k, Cnga3, Slc8a3,
GO:0060249	anatomical structure home	0.00822 ( 19 of 2312 genes )	0.00488 ( 166 of 34011 annotated genes )	0.01551	1	Terf2ip, Smc5, Il7, Wrn, Col9a1, Gnas, Ctsh, Tnks2, Dmd, Tpp1, Erbb4, Col11a2, Cartpt, Itgb3, Xrn1, Csf1r, Itgb1, Ltbp3, Ctss,
GO:0000070	mitotic sister chromatid	0.00303 ( 7 of 2312 genes )	0.00118 ( 40 of 34011 annotated genes )	0.01577	1	Ino80, Smc5, Espl1, Smc2, Smc4, Nipbl, Pogz,
GO:0001569	patterning of blood vesse	0.00303 ( 7 of 2312 genes )	0.00118 ( 40 of 34011 annotated genes )	0.01577	1	Nfatc4, Ppp3r1, Gna13, Acvr1, Rbm15, Dll4, Stk4,
GO:0006418	tRNA aminoacylation for p	0.00303 ( 7 of 2312 genes )	0.00118 ( 40 of 34011 annotated genes )	0.01577	1	Iars2, Hars2, Vars, Dars2, Lars2, Lars, Nars2,
GO:0007568	aging	0.00562 ( 13 of 2312 genes )	0.00294 ( 100 of 34011 annotated genes )	0.01589	1	Brca2, Smc5, Slc18a2, Grb2, Wrn, Ide, Msh2, Xrn1, Mnt, Zfp354a, Ilk, Tcfcp2l1, Morc3,
GO:0030307	positive regulation of ce	0.00562 ( 13 of 2312 genes )	0.00294 ( 100 of 34011 annotated genes )	0.01589	1	Ino80, Sgk1, Trpv2, Tnfrsf12a, Dscam, Nrg1, Mapt, Disc1, Ilk, 2400003C14Rik, Sema7a, Tgfbr1, Exosc9,
GO:0043491	protein kinase B signalin	0.00562 ( 13 of 2312 genes )	0.00294 ( 100 of 34011 annotated genes )	0.01589	1	Itsn1, Ptprj, Nrg1, Ccl5, Klf4, Inpp5k, Slc9a3r1, Rps6kb2, Pik3ca, Ilk, Hyal2, Tgfbr1, Ntrk2,
GO:0043542	endothelial cell migratio	0.00562 ( 13 of 2312 genes )	0.00294 ( 100 of 34011 annotated genes )	0.01589	1	Dll4, Vash1, Itgb3, Plekhg5, Slit2, Ephb4, Klf4, Plcg1, Amot, Krit1, Itgb1, Tgfbr1, Sema4a,
GO:0050796	regulation of insulin sec	0.00562 ( 13 of 2312 genes )	0.00294 ( 100 of 34011 annotated genes )	0.01589	1	Doc2b, Ppp3ca, Gcg, Cartpt, Fkbp1b, Hmgn3, Srebf1, Jak2, Cacna1e, Pfkfb2, Pim3, Uts2, Myrip,
GO:0001707	mesoderm formation	0.00389 ( 9 of 2312 genes )	0.00173 ( 59 of 34011 annotated genes )	0.01595	1	Ext2, Smad2, Inhba, Fgfr1, Bmp7, Macf1, Eomes, Pofut2, Acvr1,
GO:0051261	protein depolymerization	0.00389 ( 9 of 2312 genes )	0.00173 ( 59 of 34011 annotated genes )	0.01595	1	Shroom2, Gas2l1, Sgk1, Capza2, Clasp1, Tpm1, Spna2, Aqp2, Evl,
GO:0006470	protein dephosphorylation	0.00735 ( 17 of 2312 genes )	0.00423 ( 144 of 34011 annotated genes )	0.0161	1	Ptprj, Ppp1r12a, Ptpn6, Ppp3r1, Ppp3ca, Ptprb, Ssh3, Ptprn, Ptpru, Dusp28, Ptpn9, Ppp1cb, Ptp4a2, Ptprd, Fbxw11, Ptpn3, Ptprf,
GO:0010596	negative regulation of en	0.00216 ( 5 of 2312 genes )	0.00068 ( 23 of 34011 annotated genes )	0.01627	1	Klf4, Krit1, Dll4, Vash1, Slit2,
GO:0010862	positive regulation of pa	0.00216 ( 5 of 2312 genes )	0.00068 ( 23 of 34011 annotated genes )	0.01627	1	Acvr1, Rbpms, Inhba, Tgfbr1, Bmp7,
GO:0042147	retrograde transport, end	0.00216 ( 5 of 2312 genes )	0.00068 ( 23 of 34011 annotated genes )	0.01627	1	D6Wsu116e, Stx5a, Pikfyve, Erc1, Spag9,
GO:0061077	chaperone-mediated protei	0.00216 ( 5 of 2312 genes )	0.00068 ( 23 of 34011 annotated genes )	0.01627	1	Chordc1, Unc45a, H2-DMa, St13, Cd74,
GO:0006836	neurotransmitter transpor	0.00649 ( 15 of 2312 genes )	0.00359 ( 122 of 34011 annotated genes )	0.01631	1	Doc2b, Stx4a, Slc18a1, Pclo, Slc18a2, Ap2b1, Xbp1, Kcnc3, Sv2a, Rab3a, Slc22a1, Celsr1, Cplx1, Ntrk2, Slc6a14,
GO:0072001	renal system development	0.00865 ( 20 of 2312 genes )	0.00526 ( 179 of 34011 annotated genes )	0.01692	1	Irx3, Maged1, Pdgfra, Stra6, Slit2, Itga8, Slc12a1, Tgfbr1, Agtr1a, Bat3, Aph1c, Tsc1, Bmp7, Itgb3, Ahi1, Arl3, Mpv17, Osr2, Sulf2, Sgpl1,
GO:0032844	regulation of homeostatic	0.01038 ( 24 of 2312 genes )	0.00664 ( 226 of 34011 annotated genes )	0.01708	1	Terf2ip, Inhba, Reln, Hes5, Casq2, Asph, Gas2l1, Dicer1, Ankrd54, Scn10a, Cartpt, Itgb3, Ccl5, Fkbp1b, Ryr1, Gclm, Ryr2, Csf1r, Lyn, Rbfox2, Anxa1, Ltbp3, Plcg2, Cd74,
GO:0001649	osteoblast differentiatio	0.00735 ( 17 of 2312 genes )	0.00426 ( 145 of 34011 annotated genes )	0.01713	1	Nbr1, Pdlim7, Fgfr1, Mef2d, Gnas, Areg, Cd276, Ilk, Fam20c, Fbn2, 2410016O06Rik, Hdac4, Bmp7, Npnt, Bmpr1b, Acvr1, Sox11,
GO:0002688	regulation of leukocyte c	0.00346 ( 8 of 2312 genes )	0.00147 ( 50 of 34011 annotated genes )	0.01714	1	Figf, Ptprj, Lyn, Hc, Ccl5, Jam3, Slit2, Cd74,
GO:0048284	organelle fusion	0.00346 ( 8 of 2312 genes )	0.00147 ( 50 of 34011 annotated genes )	0.01714	1	Stx5a, Doc2b, Vamp7, 5730419I09Rik, Rab3a, Vcpip1, Anxa1, Eea1,
GO:0001704	formation of primary germ	0.00476 ( 11 of 2312 genes )	0.00235 ( 80 of 34011 annotated genes )	0.01727	1	Ext2, Smad2, Inhba, Fgfr1, Bmp7, Cdc73, Fzd7, Macf1, Eomes, Pofut2, Acvr1,
GO:0002685	regulation of leukocyte m	0.00476 ( 11 of 2312 genes )	0.00235 ( 80 of 34011 annotated genes )	0.01727	1	Figf, Ptprj, Msn, Ccl5, Itgb3, Slit2, Itga2b, Lyn, Hc, Jam3, Cd74,
GO:0003073	regulation of systemic ar	0.00476 ( 11 of 2312 genes )	0.00235 ( 80 of 34011 annotated genes )	0.01727	1	Agtr1a, Nedd4l, Corin, Slc9a3r1, Wnk1, Hsd11b2, Plcb3, Enpep, Aqp2, Tpm1, Uts2,
GO:0006469	negative regulation of pr	0.00692 ( 16 of 2312 genes )	0.00394 ( 134 of 34011 annotated genes )	0.01736	1	Ptprj, Ptpn6, Trp73, Chordc1, Gsk3b, Bmp7, Hipk3, Fam72a, Inpp5k, Wnk1, Gnb2l1, Fabp4, Rgs14, Lyn, Ilk, Hyal2,
GO:0050708	regulation of protein sec	0.00606 ( 14 of 2312 genes )	0.00329 ( 112 of 34011 annotated genes )	0.01741	1	Apbb1, Traf2, Pcsk1, Agtr1a, Panx1, Pam, Ankrd1, Nlrp1a, Csf1r, Lyn, Hc, Anxa1, Hyal2, Dnajc1,
GO:0051271	negative regulation of ce	0.00649 ( 15 of 2312 genes )	0.00362 ( 123 of 34011 annotated genes )	0.01746	1	Ptprj, Dll4, Arap3, Vash1, Slit2, Ptpru, Klf4, Slc9a3r1, Abr, Rras, Krit1, Ilk, Hc, Muc2, Hyal2,
GO:0000041	transition metal ion tran	0.00433 ( 10 of 2312 genes )	0.00206 ( 70 of 34011 annotated genes )	0.01766	1	Slc39a14, Slc39a4, Fth1, Atp2c1, Atp7a, Cltc, Scara5, Slc25a37, Slc39a13, Hsd3b6,
GO:0007338	single fertilization	0.00389 ( 9 of 2312 genes )	0.00176 ( 60 of 34011 annotated genes )	0.01768	1	Zp1, Zp3r, Cast, Clgn, Cacna1h, Trim36, Izumo1, Camk2b, Catsper1,
GO:0034612	response to tumor necrosi	0.00389 ( 9 of 2312 genes )	0.00176 ( 60 of 34011 annotated genes )	0.01768	1	Tnfrsf1a, Traf2, Aff3, Ankrd1, Ccl5, Traf3, Npnt, Inpp5k, Jak2,
GO:0010466	negative regulation of pe	0.00995 ( 23 of 2312 genes )	0.00632 ( 215 of 34011 annotated genes )	0.01779	1	Serpina1f, Pcid2, Spink13, Cast, Spint1, Serpine2, Cd109, Birc6, Serpina3c, Klf4, Cst8, Mug1, Kng2, Pcsk1n, Serpina3b, Serpinb12, Serpinb1c, Sh3rf1, Hbxip, Serpinf1, Spink5, Spink10, Tfpi,
GO:0071322	cellular response to carb	0.00303 ( 7 of 2312 genes )	0.00121 ( 41 of 34011 annotated genes )	0.01795	1	Hmgn3, Cacna1e, Ppp3ca, Prkcb, Fkbp1b, Vcam1, Pim3,
GO:0001553	luteinization	0.00130 ( 3 of 2312 genes )	0.00026 ( 9 of 34011 annotated genes )	0.0185	1	Pdgfra, Inhba, Sgpl1,
GO:0001780	neutrophil homeostasis	0.00130 ( 3 of 2312 genes )	0.00026 ( 9 of 34011 annotated genes )	0.0185	1	Pde4b, Anxa1, Jam3,
GO:0002283	neutrophil activation inv	0.00130 ( 3 of 2312 genes )	0.00026 ( 9 of 34011 annotated genes )	0.0185	1	Vamp7, Tyrobp, Abr,
GO:0005981	regulation of glycogen ca	0.00130 ( 3 of 2312 genes )	0.00026 ( 9 of 34011 annotated genes )	0.0185	1	Ppp1cb, Ppp1r3b, Ppp1r3c,
GO:0006283	transcription-coupled nuc	0.00130 ( 3 of 2312 genes )	0.00026 ( 9 of 34011 annotated genes )	0.0185	1	Ercc6, Xab2, Usp7,
GO:0008631	induction of apoptosis by	0.00130 ( 3 of 2312 genes )	0.00026 ( 9 of 34011 annotated genes )	0.0185	1	Map3k5, Jak2, Zfp622,
GO:0010667	negative regulation of ca	0.00130 ( 3 of 2312 genes )	0.00026 ( 9 of 34011 annotated genes )	0.0185	1	Hey2, Ilk, Nrg1,
GO:0010745	negative regulation of ma	0.00130 ( 3 of 2312 genes )	0.00026 ( 9 of 34011 annotated genes )	0.0185	1	Pparg, Itgb3, Abcg1,
GO:0010758	regulation of macrophage	0.00130 ( 3 of 2312 genes )	0.00026 ( 9 of 34011 annotated genes )	0.0185	1	Ptprj, Hc, Ccl5,
GO:0010842	retina layer formation	0.00130 ( 3 of 2312 genes )	0.00026 ( 9 of 34011 annotated genes )	0.0185	1	Megf11, Tspan12, Ahi1,
GO:0010880	regulation of release of	0.00130 ( 3 of 2312 genes )	0.00026 ( 9 of 34011 annotated genes )	0.0185	1	Ryr2, Fkbp1b, Casq2,
GO:0030174	regulation of DNA-depende	0.00130 ( 3 of 2312 genes )	0.00026 ( 9 of 34011 annotated genes )	0.0185	1	Clspn, Ciz1, Stra8,
GO:0033120	positive regulation of RN	0.00130 ( 3 of 2312 genes )	0.00026 ( 9 of 34011 annotated genes )	0.0185	1	Rbm22, Tra2b, Khdrbs3,
GO:0042347	negative regulation of NF	0.00130 ( 3 of 2312 genes )	0.00026 ( 9 of 34011 annotated genes )	0.0185	1	Faf1, Cyld, Fbxw11,
GO:0042976	activation of Janus kinas	0.00130 ( 3 of 2312 genes )	0.00026 ( 9 of 34011 annotated genes )	0.0185	1	Jak2, Agtr1a, Ghr,
GO:0043618	regulation of transcripti	0.00130 ( 3 of 2312 genes )	0.00026 ( 9 of 34011 annotated genes )	0.0185	1	Cd36, Chek1, Arnt,
GO:0044030	regulation of DNA methyla	0.00130 ( 3 of 2312 genes )	0.00026 ( 9 of 34011 annotated genes )	0.0185	1	Pik3ca, Dnmt3a, Gsk3b,
GO:0045749	negative regulation of S	0.00130 ( 3 of 2312 genes )	0.00026 ( 9 of 34011 annotated genes )	0.0185	1	Apbb1, Apbb2, Cdc73,
GO:0046112	nucleobase biosynthetic p	0.00130 ( 3 of 2312 genes )	0.00026 ( 9 of 34011 annotated genes )	0.0185	1	Aprt, Umps, Shmt1,
GO:0051322	anaphase	0.00130 ( 3 of 2312 genes )	0.00026 ( 9 of 34011 annotated genes )	0.0185	1	Ska1, Espl1, Usp44,
GO:0060314	regulation of ryanodine-s	0.00130 ( 3 of 2312 genes )	0.00026 ( 9 of 34011 annotated genes )	0.0185	1	Jsrp1, Fkbp1b, Casq2,
GO:0071675	regulation of mononuclear	0.00130 ( 3 of 2312 genes )	0.00026 ( 9 of 34011 annotated genes )	0.0185	1	Ptprj, Ccl5, Slit2,
GO:0050817	coagulation	0.00649 ( 15 of 2312 genes )	0.00365 ( 124 of 34011 annotated genes )	0.01867	1	Ptprj, Proz, Fhad1, Pdgfra, Gna13, Rab27a, Cd36, Serpine2, Itgb3, Itga2b, Otog, Hps5, Lyn, Evl, Tfpi,
GO:0060560	developmental growth invo	0.00649 ( 15 of 2312 genes )	0.00365 ( 124 of 34011 annotated genes )	0.01867	1	Bin3, Trpv2, Tnfrsf12a, Dscam, Med12, Mapt, Dclk1, Col9a1, Slit2, Disc1, Areg, Ilk, 2400003C14Rik, Sema7a, Ryk,
GO:0006835	dicarboxylic acid transpo	0.00173 ( 4 of 2312 genes )	0.00047 ( 16 of 34011 annotated genes )	0.01898	1	Gm6614, Slc13a5, Slc1a1, Slc22a6,
GO:0010656	negative regulation of mu	0.00173 ( 4 of 2312 genes )	0.00047 ( 16 of 34011 annotated genes )	0.01898	1	Hey2, Ilk, Agtr1a, Nrg1,
GO:0021697	cerebellar cortex formati	0.00173 ( 4 of 2312 genes )	0.00047 ( 16 of 34011 annotated genes )	0.01898	1	Kndc1, Rora, Cdk5, Atp7a,
GO:0021889	olfactory bulb interneuro	0.00173 ( 4 of 2312 genes )	0.00047 ( 16 of 34011 annotated genes )	0.01898	1	Erbb4, Dicer1, Fgfr1, Slit2,
GO:0061178	regulation of insulin sec	0.00173 ( 4 of 2312 genes )	0.00047 ( 16 of 34011 annotated genes )	0.01898	1	Hmgn3, Cacna1e, Fkbp1b, Pim3,
GO:0071560	cellular response to tran	0.00173 ( 4 of 2312 genes )	0.00047 ( 16 of 34011 annotated genes )	0.01898	1	Sox5, Hyal2, Tgfbr1, Ankrd1,
GO:2000142	regulation of transcripti	0.00173 ( 4 of 2312 genes )	0.00047 ( 16 of 34011 annotated genes )	0.01898	1	Hey2, Rrn3, Creb1, Atf7ip,
GO:0002444	myeloid leukocyte mediate	0.00346 ( 8 of 2312 genes )	0.00150 ( 51 of 34011 annotated genes )	0.01918	1	Pi4k2a, Gm885, Mll5, Adora2b, Vamp7, Abr, Lyn, Tac4,
GO:0043467	regulation of generation	0.00346 ( 8 of 2312 genes )	0.00150 ( 51 of 34011 annotated genes )	0.01918	1	Hdac4, Ppp1r3b, Atp7a, Pnpt1, Inpp5k, Ppp1cb, Ppp1r3c, Cisd1,
GO:0048546	digestive tract morphogen	0.00346 ( 8 of 2312 genes )	0.00150 ( 51 of 34011 annotated genes )	0.01918	1	Foxp4, Sox10, Trp73, Pdgfra, Smad2, Sox11, Nipbl, Stra6,
GO:0014013	regulation of gliogenesis	0.00433 ( 10 of 2312 genes )	0.00209 ( 71 of 34011 annotated genes )	0.01936	1	Mycn, Trp73, Dicer1, Pparg, Serpine2, Sox10, Lyn, Sox11, Prkci, Hes5,
GO:0003209	cardiac atrium morphogene	0.00216 ( 5 of 2312 genes )	0.00071 ( 24 of 34011 annotated genes )	0.01945	1	Tnnt2, Hey2, Acvr1, Dll4, Whsc1,
GO:0015893	drug transport	0.00216 ( 5 of 2312 genes )	0.00071 ( 24 of 34011 annotated genes )	0.01945	1	Slc18a1, Slc47a1, Gm6614, Slc22a1, Slc18a2,
GO:0030835	negative regulation of ac	0.00216 ( 5 of 2312 genes )	0.00071 ( 24 of 34011 annotated genes )	0.01945	1	Shroom2, Capza2, Tpm1, Spna2, Evl,
GO:0043489	RNA stabilization	0.00216 ( 5 of 2312 genes )	0.00071 ( 24 of 34011 annotated genes )	0.01945	1	Elavl1, Apobec1, Igf2bp1, Rbm10, Dhx9,
GO:0048255	mRNA stabilization	0.00216 ( 5 of 2312 genes )	0.00071 ( 24 of 34011 annotated genes )	0.01945	1	Elavl1, Apobec1, Igf2bp1, Rbm10, Dhx9,
GO:0060291	long-term synaptic potent	0.00216 ( 5 of 2312 genes )	0.00071 ( 24 of 34011 annotated genes )	0.01945	1	Camk2b, Rgs14, Serpine2, Ntrk2, Htr7,
GO:0002443	leukocyte mediated immuni	0.00952 ( 22 of 2312 genes )	0.00603 ( 205 of 34011 annotated genes )	0.01946	1	Pi4k2a, Gm885, Traf2, B2m, Trpm4, H2-DMa, H2-K1, Vamp7, Msh2, Abr, Ctsh, Exosc3, Ptpn6, Mll5, Adora2b, Rab27a, Cr1l, Lyn, Hc, Il12a, Tac4, Cd74,
GO:0043506	regulation of JUN kinase	0.00389 ( 9 of 2312 genes )	0.00179 ( 61 of 34011 annotated genes )	0.01955	1	Gab1, Ercc6, Map3k1, Trp73, Traf2, Mapk8ip3, Hipk3, Magi3, Spag9,
GO:0006364	rRNA processing	0.00562 ( 13 of 2312 genes )	0.00303 ( 103 of 34011 annotated genes )	0.01991	1	Rpf1, Tfb2m, Rpl5, Rcl1, Rps28, Exosc8, Utp14a, Isg20, Exosc3, Exosc5, Utp6, Nol9, Exosc9,
GO:0002274	myeloid leukocyte activat	0.00606 ( 14 of 2312 genes )	0.00335 ( 114 of 34011 annotated genes )	0.02003	1	Pi4k2a, Gm885, Mll5, Adora2b, Ccl5, Fert2, Vamp7, Abr, Tyrobp, Lyn, Rora, Cnr2, Hyal2, Tac4,
GO:0002791	regulation of peptide sec	0.00606 ( 14 of 2312 genes )	0.00335 ( 114 of 34011 annotated genes )	0.02003	1	Doc2b, Ppp3ca, Gcg, Cartpt, Fkbp1b, Hmgn3, Srebf1, Jak2, Cacna1e, Cd74, Pfkfb2, Pim3, Uts2, Myrip,
GO:0090087	regulation of peptide tra	0.00606 ( 14 of 2312 genes )	0.00335 ( 114 of 34011 annotated genes )	0.02003	1	Doc2b, Ppp3ca, Gcg, Cartpt, Fkbp1b, Hmgn3, Srebf1, Jak2, Cacna1e, Cd74, Pfkfb2, Pim3, Uts2, Myrip,
GO:0050776	regulation of immune resp	0.01514 ( 35 of 2312 genes )	0.01070 ( 364 of 34011 annotated genes )	0.02007	1	Traf2, Pparg, Trpm4, Prkcb, Abr, Cd276, Sema7a, Ptpn6, Mill2, Pglyrp3, Adora2b, Traf3, Peli1, Plcg1, Cr1l, Hc, Il27, Ptprj, B2m, H2-K1, H2-DMa, Cd36, Nlrc5, Ctla4, Ctsh, Cacnb3, Rbck1, Col3a1, Fert2, Lyn, Il12a, Plcg2, Tbk1, C6, Cd74,
GO:0007189	activation of adenylate c	0.00303 ( 7 of 2312 genes )	0.00123 ( 42 of 34011 annotated genes )	0.02033	1	Gnas, Slc9a3r1, Rxfp2, Adora2b, Ptgir, Gna13, Htr7,
GO:0031532	actin cytoskeleton reorga	0.00303 ( 7 of 2312 genes )	0.00123 ( 42 of 34011 annotated genes )	0.02033	1	Fert2, Mink1, Csf1r, Cdc42bpa, Flna, Atp2c1, Spna2,
GO:0001892	embryonic placenta develo	0.00476 ( 11 of 2312 genes )	0.00241 ( 82 of 34011 annotated genes )	0.02046	1	Gab1, Spint1, Grb2, Sp3, Vcam1, Birc6, Hey2, Eomes, Tcfeb, Arnt, Stk4,
GO:0060485	mesenchyme development	0.00735 ( 17 of 2312 genes )	0.00435 ( 148 of 34011 annotated genes )	0.02056	1	Efnb1, Ppp3r1, Erbb3, Gsk3b, Fgfr1, Sox10, Col1a1, Eomes, Tgfbr1, Erbb4, Smad2, Bmp7, Hey2, Pofut2, Flna, Acvr1, Sox11,
GO:0061138	morphogenesis of a branch	0.00822 ( 19 of 2312 genes )	0.00503 ( 171 of 34011 annotated genes )	0.02059	1	Ppp3r1, Maged1, Gna13, Spint1, Dll4, Fgfr1, Frs2, Areg, Celsr1, Ctsh, Ilk, Stk4, Nfatc4, Agtr1a, Grb2, Bmp7, Npnt, Rbm15, Acvr1,
GO:0060627	regulation of vesicle-med	0.01038 ( 24 of 2312 genes )	0.00676 ( 230 of 34011 annotated genes )	0.02067	1	Doc2b, Rspo1, Pclo, Stxbp5, Prtn3, Cd36, Cdk5, Clip3, Sh3gl2, Abr, Cacna1h, Gnb2l1, Rab3a, Scyl2, Tulp1, Adora2b, Rab27a, Pacsin3, Ahi1, Cd2ap, Mib1, Lyn, Anxa1, Itgb1,
GO:0021587	cerebellum morphogenesis	0.00260 ( 6 of 2312 genes )	0.00097 ( 33 of 34011 annotated genes )	0.0207	1	Kndc1, Rora, Cdk5, Serpine2, Atp7a, Gnpat,
GO:0048524	positive regulation of vi	0.00260 ( 6 of 2312 genes )	0.00097 ( 33 of 34011 annotated genes )	0.0207	1	Top2a, Map3k1, Inpp5k, Tarbp2, Rsf1, Ccl5,
GO:0060021	palate development	0.00433 ( 10 of 2312 genes )	0.00212 ( 72 of 34011 annotated genes )	0.02118	1	Asph, Pdgfra, Smad2, Inhba, Col11a2, Sox11, Osr2, Sgpl1, Tgfbr1, Alx4,
GO:0045927	positive regulation of gr	0.00779 ( 18 of 2312 genes )	0.00470 ( 160 of 34011 annotated genes )	0.02123	1	Ino80, Il7, Creb1, Dscam, Nrg1, Nipbl, Disc1, Ghr, Ilk, 2400003C14Rik, Sema7a, Tgfbr1, Tcfcp2l1, Sgk1, Trpv2, Tnfrsf12a, Mapt, Exosc9,
GO:0034470	ncRNA processing	0.00908 ( 21 of 2312 genes )	0.00573 ( 195 of 34011 annotated genes )	0.0213	1	Ints9, Rpf1, Tarbp2, Dus1l, Tfb2m, Rpl5, Adat2, Rps28, Tyw1, Isg20, Exosc3, Exosc5, Ints5, Mettl1, Dicer1, Rcl1, Exosc8, Utp14a, Utp6, Nol9, Exosc9,
GO:0032088	negative regulation of NF	0.00346 ( 8 of 2312 genes )	0.00153 ( 52 of 34011 annotated genes )	0.02138	1	Rps3, Rbck1, Traf3, Klf4, Peli1, Nlrc5, Cyld, Usp7,
GO:0048489	synaptic vesicle transpor	0.00346 ( 8 of 2312 genes )	0.00153 ( 52 of 34011 annotated genes )	0.02138	1	Stx4a, Sh3gl2, Rab3a, Pclo, Slc18a2, Cplx1, Ap2b1, Cdk5,
GO:0060322	head development	0.00346 ( 8 of 2312 genes )	0.00153 ( 52 of 34011 annotated genes )	0.02138	1	Asph, Cdk2ap1, Col1a1, Pdgfra, Osr2, Nipbl, Sgpl1, Stra6,
GO:0008643	carbohydrate transport	0.00606 ( 14 of 2312 genes )	0.00338 ( 115 of 34011 annotated genes )	0.02145	1	G6pc3, Erbb3, Erbb4, Slc45a1, Slc2a6, Prkcb, Nrg1, Slc2a3, Fgf21, Slc2a4, Clip3, Inpp5k, Prkci, Aqp2,
GO:0014031	mesenchymal cell developm	0.00606 ( 14 of 2312 genes )	0.00338 ( 115 of 34011 annotated genes )	0.02145	1	Efnb1, Ppp3r1, Erbb4, Smad2, Gsk3b, Hey2, Sox10, Col1a1, Eomes, Pofut2, Acvr1, Flna, Sox11, Tgfbr1,
GO:0009100	glycoprotein metabolic pr	0.00952 ( 22 of 2312 genes )	0.00609 ( 207 of 34011 annotated genes )	0.0215	1	Atp4b, Galnt2, Col11a1, Ganab, Slc4a10, B3galt5, Atp7a, Ide, St6galnac6, Fktn, Galnt10, Hs2st1, Soat1, Chst8, Ext2, St3gal1, Stt3a, Gnptg, Gpc1, Alg6, Sulf2, Abcg1,
GO:0045665	negative regulation of ne	0.00389 ( 9 of 2312 genes )	0.00182 ( 62 of 34011 annotated genes )	0.02155	1	Apbb1, Dixdc1, Pax6, Irx3, Trp73, Bmp7, Mib1, Itgb1, Hes5,
GO:0042157	lipoprotein metabolic pro	0.00476 ( 11 of 2312 genes )	0.00244 ( 83 of 34011 annotated genes )	0.0222	1	Zdhhc2, Atg10, Zdhhc1, Apobec1, Apob, Itgb3, Pigc, Clip3, Pigk, Pign, Pigx,
GO:0031644	regulation of neurologica	0.01125 ( 26 of 2312 genes )	0.00753 ( 256 of 34011 annotated genes )	0.02251	1	Ppp3ca, Cdk5, Gsk3b, Fgfr1, Serpine2, Gria4, Kcnc3, Reln, Rab3a, Celsr1, Camk2b, Cnr2, Hes5, Nfatc4, Slc18a1, Myo6, Erbb4, Dicer1, Cartpt, Htr7, Grm3, Rgs14, Ntrk2, Ctss, Uts2, Lama2,
GO:0001678	cellular glucose homeosta	0.00303 ( 7 of 2312 genes )	0.00126 ( 43 of 34011 annotated genes )	0.02292	1	Hmgn3, Cacna1e, Ppp3ca, Cartpt, Fkbp1b, Vcam1, Pim3,
GO:0016126	sterol biosynthetic proce	0.00303 ( 7 of 2312 genes )	0.00126 ( 43 of 34011 annotated genes )	0.02292	1	Srebf1, Dhcr7, Apob, Hmgcs1, Sc5d, Tm7sf2, Abcg1,
GO:0031110	regulation of microtubule	0.00303 ( 7 of 2312 genes )	0.00126 ( 43 of 34011 annotated genes )	0.02292	1	Clip3, Ska1, Gas2l1, Sgk1, Dst, Mapt, Clasp1,
GO:0032272	negative regulation of pr	0.00303 ( 7 of 2312 genes )	0.00126 ( 43 of 34011 annotated genes )	0.02292	1	Clip3, Sgk1, Capza2, Tpm1, Spna2, Slit2, Evl,
GO:0043038	amino acid activation	0.00303 ( 7 of 2312 genes )	0.00126 ( 43 of 34011 annotated genes )	0.02292	1	Iars2, Hars2, Vars, Dars2, Lars2, Lars, Nars2,
GO:0043039	tRNA aminoacylation	0.00303 ( 7 of 2312 genes )	0.00126 ( 43 of 34011 annotated genes )	0.02292	1	Iars2, Hars2, Vars, Dars2, Lars2, Lars, Nars2,
GO:0045670	regulation of osteoclast	0.00303 ( 7 of 2312 genes )	0.00126 ( 43 of 34011 annotated genes )	0.02292	1	Gnas, Clec2g, Csf1r, Ccl5, Itgb3, Il17a, Cartpt,
GO:0071375	cellular response to pept	0.00606 ( 14 of 2312 genes )	0.00341 ( 116 of 34011 annotated genes )	0.02295	1	Pxn, Sgk1, Pparg, Grb2, Prkcb, Ghr, Fert2, Slc2a4, Srebf1, Inpp5k, Smarcc1, Jak2, Prkci, Ptprf,
GO:0003071	renal system process invo	0.00216 ( 5 of 2312 genes )	0.00074 ( 25 of 34011 annotated genes )	0.02301	1	Hsd11b2, Slc9a3r1, Agtr1a, Aqp2, Uts2,
GO:0003407	neural retina development	0.00216 ( 5 of 2312 genes )	0.00074 ( 25 of 34011 annotated genes )	0.02301	1	Megf11, Cnga3, Gnat2, Tspan12, Ahi1,
GO:0007257	activation of JUN kinase	0.00216 ( 5 of 2312 genes )	0.00074 ( 25 of 34011 annotated genes )	0.02301	1	Gab1, Ercc6, Map3k1, Mapk8ip3, Spag9,
GO:0010883	regulation of lipid stora	0.00216 ( 5 of 2312 genes )	0.00074 ( 25 of 34011 annotated genes )	0.02301	1	Apob, Pparg, Cd36, Itgb3, Abcg1,
GO:0016925	protein sumoylation	0.00216 ( 5 of 2312 genes )	0.00074 ( 25 of 34011 annotated genes )	0.02301	1	Hdac4, Pias1, Trpm4, Tollip, Arnt,
GO:0021696	cerebellar cortex morphog	0.00216 ( 5 of 2312 genes )	0.00074 ( 25 of 34011 annotated genes )	0.02301	1	Kndc1, Rora, Cdk5, Serpine2, Atp7a,
GO:0043113	receptor clustering	0.00216 ( 5 of 2312 genes )	0.00074 ( 25 of 34011 annotated genes )	0.02301	1	Ift122, Dok7, Flna, Cdk5, Agrn,
GO:0051656	establishment of organell	0.00433 ( 10 of 2312 genes )	0.00215 ( 73 of 34011 annotated genes )	0.02311	1	Brca2, Shroom2, Arhgap21, Pclo, Rab27a, Cdc42bpa, Mapt, Ccdc52, Sun2, Syne2,
GO:0000303	response to superoxide	0.00173 ( 4 of 2312 genes )	0.00050 ( 17 of 34011 annotated genes )	0.02353	1	Ercc6, Cd36, Atp7a, Mpo,
GO:0005980	glycogen catabolic proces	0.00173 ( 4 of 2312 genes )	0.00050 ( 17 of 34011 annotated genes )	0.02353	1	Pygm, Ppp1cb, Ppp1r3b, Ppp1r3c,
GO:0009251	glucan catabolic process	0.00173 ( 4 of 2312 genes )	0.00050 ( 17 of 34011 annotated genes )	0.02353	1	Pygm, Ppp1cb, Ppp1r3b, Ppp1r3c,
GO:0044247	cellular polysaccharide c	0.00173 ( 4 of 2312 genes )	0.00050 ( 17 of 34011 annotated genes )	0.02353	1	Pygm, Ppp1cb, Ppp1r3b, Ppp1r3c,
GO:0045071	negative regulation of vi	0.00173 ( 4 of 2312 genes )	0.00050 ( 17 of 34011 annotated genes )	0.02353	1	Oas3, Inpp5k, Oasl1, Ccl5,
GO:0046605	regulation of centrosome	0.00173 ( 4 of 2312 genes )	0.00050 ( 17 of 34011 annotated genes )	0.02353	1	Chordc1, Chek1, Ccdc52, Rock2,
GO:0046688	response to copper ion	0.00173 ( 4 of 2312 genes )	0.00050 ( 17 of 34011 annotated genes )	0.02353	1	Aanat, Atp7a, Aqp2, Sord,
GO:0060251	regulation of glial cell	0.00173 ( 4 of 2312 genes )	0.00050 ( 17 of 34011 annotated genes )	0.02353	1	Dicer1, Lyn, Prkci, Sox11,
GO:0002697	regulation of immune effe	0.00908 ( 21 of 2312 genes )	0.00579 ( 197 of 34011 annotated genes )	0.02355	1	Il27, Traf2, B2m, Tarbp2, Trpm4, Cd36, H2-K1, Abr, Sema7a, Ptpn6, Mill2, Pglyrp3, Adora2b, Ccl5, Traf3, Fert2, Cr1l, Lyn, Il12a, C6, Cd74,
GO:0031333	negative regulation of pr	0.00389 ( 9 of 2312 genes )	0.00185 ( 63 of 34011 annotated genes )	0.0237	1	Sgk1, Gsk3b, Slit2, Hey2, Clip3, Capza2, Spna2, Tpm1, Evl,
GO:0034764	positive regulation of tr	0.00389 ( 9 of 2312 genes )	0.00185 ( 63 of 34011 annotated genes )	0.0237	1	Ubr5, Erbb4, Trpv2, Rbck1, Gcg, Flna, Rbpms, Hyal2, Tgfbr1,
GO:0048332	mesoderm morphogenesis	0.00389 ( 9 of 2312 genes )	0.00185 ( 63 of 34011 annotated genes )	0.0237	1	Ext2, Smad2, Inhba, Fgfr1, Bmp7, Macf1, Eomes, Pofut2, Acvr1,
GO:0017148	negative regulation of tr	0.00346 ( 8 of 2312 genes )	0.00156 ( 53 of 34011 annotated genes )	0.02375	1	Eif2b4, Fmr1, Gnb2l1, Tsc1, Igf2bp1, Cpeb2, Cpeb3, Patl1,
GO:0060491	regulation of cell projec	0.00346 ( 8 of 2312 genes )	0.00156 ( 53 of 34011 annotated genes )	0.02375	1	Fert2, Ift46, Fnbp1l, Myo3b, Ssh3, Kbtbd10, Tgfbr1, Slit2,
GO:0016601	Rac protein signal transd	0.00260 ( 6 of 2312 genes )	0.00100 ( 34 of 34011 annotated genes )	0.02375	1	Chn1, Arap3, Ntrk2, Agrn, Eps8l1, Dbnl,
GO:0060042	retina morphogenesis in c	0.00260 ( 6 of 2312 genes )	0.00100 ( 34 of 34011 annotated genes )	0.02375	1	Megf11, Cnga3, Gnat2, Dscam, Tspan12, Ahi1,
GO:0006091	generation of precursor m	0.01254 ( 29 of 2312 genes )	0.00864 ( 294 of 34011 annotated genes )	0.02377	1	Ndufs1, Ndufa8, Gsk3b, Atp7a, Gnas, Pygm, Pnpt1, Msh2, Ppp1cb, Ndufa2, Ndufa1, Inpp5k, Nfatc4, Aco1, Hdac4, Fastkd2, Ndufb10, Ppp1r3b, Cybasc3, Ppp1r1a, Ndufa10, Aifm3, Aldob, Cr1l, Cisd1, Ppp1r3c, Pdhb, Dhtkd1, Pfkfb2,
GO:0048511	rhythmic process	0.00822 ( 19 of 2312 genes )	0.00512 ( 174 of 34011 annotated genes )	0.0242	1	Aanat, Creb1, Pdgfra, Inhba, Dhx9, Eif2b4, Gnb2l1, Kcnma1, Per1, Cartpt, Htr7, Adrbk1, Clock, Alb, Bmpr1b, Stra8, Fbxw11, Sgpl1, Uts2,
GO:0002689	negative regulation of le	0.00087 ( 2 of 2312 genes )	0.00012 ( 4 of 34011 annotated genes )	0.0245	1	Hc, Slit2,
GO:0003177	pulmonary valve developme	0.00087 ( 2 of 2312 genes )	0.00012 ( 4 of 34011 annotated genes )	0.0245	1	Hey2, Stra6,
GO:0003184	pulmonary valve morphogen	0.00087 ( 2 of 2312 genes )	0.00012 ( 4 of 34011 annotated genes )	0.0245	1	Hey2, Stra6,
GO:0003289	atrial septum primum morp	0.00087 ( 2 of 2312 genes )	0.00012 ( 4 of 34011 annotated genes )	0.0245	1	Acvr1, Whsc1,
GO:0006407	rRNA export from nucleus	0.00087 ( 2 of 2312 genes )	0.00012 ( 4 of 34011 annotated genes )	0.0245	1	Rps28, Tsc1,
GO:0010815	bradykinin catabolic proc	0.00087 ( 2 of 2312 genes )	0.00012 ( 4 of 34011 annotated genes )	0.0245	1	Ctsh, Ide,
GO:0016246	RNA interference	0.00087 ( 2 of 2312 genes )	0.00012 ( 4 of 34011 annotated genes )	0.0245	1	Dicer1, Tarbp2,
GO:0030050	vesicle transport along a	0.00087 ( 2 of 2312 genes )	0.00012 ( 4 of 34011 annotated genes )	0.0245	1	Fnbp1l, Myrip,
GO:0031034	myosin filament assembly	0.00087 ( 2 of 2312 genes )	0.00012 ( 4 of 34011 annotated genes )	0.0245	1	Rap1gds1, Mybpc3,
GO:0031340	positive regulation of ve	0.00087 ( 2 of 2312 genes )	0.00012 ( 4 of 34011 annotated genes )	0.0245	1	Doc2b, Anxa1,
GO:0034770	histone H4-K20 methylatio	0.00087 ( 2 of 2312 genes )	0.00012 ( 4 of 34011 annotated genes )	0.0245	1	Suv420h1, Baz2a,
GO:0043501	skeletal muscle adaptatio	0.00087 ( 2 of 2312 genes )	0.00012 ( 4 of 34011 annotated genes )	0.0245	1	Ppp3ca, Cacna1s,
GO:0045006	DNA deamination	0.00087 ( 2 of 2312 genes )	0.00012 ( 4 of 34011 annotated genes )	0.0245	1	Exosc3, Exosc5,
GO:0045091	regulation of retroviral	0.00087 ( 2 of 2312 genes )	0.00012 ( 4 of 34011 annotated genes )	0.0245	1	Top2a, Inpp5k,
GO:0045345	positive regulation of MH	0.00087 ( 2 of 2312 genes )	0.00012 ( 4 of 34011 annotated genes )	0.0245	1	Nlrc5, Ciita,
GO:0046499	S-adenosylmethioninamine	0.00087 ( 2 of 2312 genes )	0.00012 ( 4 of 34011 annotated genes )	0.0245	1	Dnmt3a, Dnmt3b,
GO:0050689	negative regulation of de	0.00087 ( 2 of 2312 genes )	0.00012 ( 4 of 34011 annotated genes )	0.0245	1	Mill2, Tarbp2,
GO:0051764	actin crosslink formation	0.00087 ( 2 of 2312 genes )	0.00012 ( 4 of 34011 annotated genes )	0.0245	1	Tnnt2, Flna,
GO:0051775	response to redox state	0.00087 ( 2 of 2312 genes )	0.00012 ( 4 of 34011 annotated genes )	0.0245	1	Ryr2, Fkbp1b,
GO:0061038	uterus morphogenesis	0.00087 ( 2 of 2312 genes )	0.00012 ( 4 of 34011 annotated genes )	0.0245	1	Nipbl, Stra6,
GO:0061156	pulmonary artery morphoge	0.00087 ( 2 of 2312 genes )	0.00012 ( 4 of 34011 annotated genes )	0.0245	1	Hey2, Stra6,
GO:0070099	regulation of chemokine-m	0.00087 ( 2 of 2312 genes )	0.00012 ( 4 of 34011 annotated genes )	0.0245	1	Ccl5, Slit2,
GO:0070100	negative regulation of ch	0.00087 ( 2 of 2312 genes )	0.00012 ( 4 of 34011 annotated genes )	0.0245	1	Ccl5, Slit2,
GO:0071025	RNA surveillance	0.00087 ( 2 of 2312 genes )	0.00012 ( 4 of 34011 annotated genes )	0.0245	1	Xrn1, Exosc9,
GO:0071027	nuclear RNA surveillance	0.00087 ( 2 of 2312 genes )	0.00012 ( 4 of 34011 annotated genes )	0.0245	1	Xrn1, Exosc9,
GO:0071028	nuclear mRNA surveillance	0.00087 ( 2 of 2312 genes )	0.00012 ( 4 of 34011 annotated genes )	0.0245	1	Xrn1, Exosc9,
GO:0071670	smooth muscle cell chemot	0.00087 ( 2 of 2312 genes )	0.00012 ( 4 of 34011 annotated genes )	0.0245	1	Lpar1, Slit2,
GO:0090286	cytoskeletal anchoring at	0.00087 ( 2 of 2312 genes )	0.00012 ( 4 of 34011 annotated genes )	0.0245	1	Sun2, Syne2,
GO:0090308	regulation of methylation	0.00087 ( 2 of 2312 genes )	0.00012 ( 4 of 34011 annotated genes )	0.0245	1	Tet1, Apobec1,
GO:0006275	regulation of DNA replica	0.00519 ( 12 of 2312 genes )	0.00279 ( 95 of 34011 annotated genes )	0.02453	1	Ino80, Brca2, Clspn, Pdgfra, Pds5a, Areg, Dna2, Ciz1, Pcna, Stra8, Stag2, Ccdc88a,
GO:0031214	biomineral tissue develop	0.00562 ( 13 of 2312 genes )	0.00312 ( 106 of 34011 annotated genes )	0.02466	1	Nbr1, Dicer1, Bmp7, Amtn, Col1a1, Amelx, Acvr1, Bmpr1b, Cd276, Fam20c, Ltbp3, Osr2, Fbn2,
[truncated: 2,236 more rows]
