# Supplementary material for: The Y chromosome as a regulatory element shaping immune cell transcriptomes and susceptibility to autoimmune disease
Source: HighWire-hosted journal article supplement (doi:10.1101/gr.156703.113), 2013-06-25
Supplement: Supplemental_Tables.zip [file Table S8_SJLMac_GOTerms.xlsx]

## Sheet: YmusvsSJLMacFDR0.05Unique.txt
Table S8. GO term analysis on macrophage differentially expressed transcripts (FDR<0.05) from SJL-ChrYB10.S vs. SJL dataset. Terms with P<1.0E-3 are shown.
GOID	GO_term	Frequency	Genome frequency	P-value	Corrected P-value	Gene(s) Directly Annotated GOID list
GO:0009987	cellular process	0.47187 ( 1065 of 2257 genes )	0.39346 (13382 of 34011 annotated genes )	2.253e-41	7.163e-38	Clec7a, Nfe2l2, Mybpc2, Farp1, 4930447C04Rik, Ddx56, Psma3, Lhb, Olfr196, Ccl7, Tada2a, Mtl5, Gspt1, Rapgefl1, Mapk6, Aldh1a1, Jmjd6, Nsfl1c, Tspo, Mthfd1l, Nupr1, Prpf6, Dab2ip, Gbp6, Gypa, Rbpj, Chaf1b, Tmed10, Olfr1137, Pkm2, Cenpj, Pea15a, Vdac3, Snx6, Oas1a, Usp36, Daam1, Ccl12, Pla2g16, Pilra, Degs1, Ndufb5, Smurf1, Mir331, Tnik, Cnr1, Ndel1, Psma5, Slc37a3, Ankrd13c, Ddx4, Cnksr2, Irgm1, N…
GO:0008152	metabolic process	0.32743 ( 739 of 2257 genes )	0.26565 ( 9035 of 34011 annotated genes )	1.284e-27	4.084e-24	Nfe2l2, Cox4i1, Suclg1, Cyp51, Farp1, Mapkapk2, 4930447C04Rik, Ddx56, Fkbp9, Psma3, Lhb, Atp6v0c, Rest, Tada2a, Gpi1, Cst7, Ttn, Gspt1, Dgkh, Mapk6, Aldh1a1, Jmjd6, Prpf4, Tspo, Mthfd1l, Nupr1, Ptpn11, Adam7, Prpf6, Papd7, Galk2, Dab2ip, Mras, Tap1, Nlrc5, Rbpj, Chaf1b, Tmed10, Itih3, 2700060E02Rik, Wfdc6b, Pkm2, Mcpt8, Sgms2, Dpp10, Snx6, Oas1a, Mir34c, Usp36, Pla2g16, Acly, Rhot1, Degs1, Ndufb5…
GO:0044238	primary metabolic process	0.27426 ( 619 of 2257 genes )	0.22525 ( 7661 of 34011 annotated genes )	9.797e-21	3.115e-17	Nfe2l2, Cyp51, Mapkapk2, 4930447C04Rik, Ddx56, Fkbp9, Psma3, Lhb, Atp6v0c, Rest, Tada2a, Gpi1, Ttn, Gspt1, Dgkh, Mapk6, Aldh1a1, Jmjd6, Prpf4, Tspo, Nupr1, Ptpn11, Adam7, Prpf6, Papd7, Galk2, Dab2ip, Mras, Tap1, Nlrc5, Rbpj, Chaf1b, Itih3, 2700060E02Rik, Pkm2, Mcpt8, Sgms2, Dpp10, Snx6, Oas1a, Usp36, Pla2g16, Acly, Rhot1, Degs1, Mrpl39, Smurf1, Fkbp7, Tmem195, Smpdl3b, Hdlbp, 2010106G01Rik, Tnik,…
GO:0044237	cellular metabolic proces	0.27249 ( 615 of 2257 genes )	0.22384 ( 7613 of 34011 annotated genes )	1.495e-20	4.755e-17	Nfe2l2, Suclg1, Cyp51, Farp1, Mapkapk2, 4930447C04Rik, Ddx56, Fkbp9, Psma3, Lhb, Atp6v0c, Rest, Tada2a, Gpi1, Ttn, Gspt1, Dgkh, Mapk6, Aldh1a1, Jmjd6, Prpf4, Tspo, Mthfd1l, Nupr1, Ptpn11, Prpf6, Papd7, Galk2, Dab2ip, Mras, Tap1, Nlrc5, Rbpj, Chaf1b, Tmed10, 2700060E02Rik, Pkm2, Sgms2, Snx6, Oas1a, Usp36, Pla2g16, Acly, Rhot1, Degs1, Ndufb5, Mrpl39, Smurf1, Fkbp7, Tmem195, Smpdl3b, Tnik, Gemin7, C…
GO:0051179	localization	0.15906 ( 359 of 2257 genes )	0.11543 ( 3926 of 34011 annotated genes )	3.821e-19	1.215e-15	Clec7a, Sec22b, Vps54, Rassf9, Ndufb7, Atp6v0c, Hsp90aa1, Txnl1, Ccl7, Rest, Cybb, Pllp, Slc6a12, Gsn, Jmjd6, Tspo, Ptpn11, Prpf6, Slco1a4, Dab2ip, Ndufa5, Tap1, Hmgcr, Trappc6b, Abca1, Kcnb1, Fam40b, P2ry2, Pycard, S100a6, Ndufb6, Il1a, Exoc6b, Gypa, Rbpj, Tmed10, Cd209a, Rab8a, Nr1i2, Ndufa4, Nphs1, Pea15a, Ndufb3, Dpysl3, Xpo7, Vdac3, Snx6, Ergic3, Nat3, Ccl12, Fyttd1, Tlr2, Rhot1, Bnip3, Accn…
GO:0051234	establishment of localiza	0.13381 ( 302 of 2257 genes )	0.09470 ( 3221 of 34011 annotated genes )	1.652e-17	5.255e-14	Clec7a, Sec22b, Vps54, Rassf9, Ndufb7, Atp6v0c, Hsp90aa1, Txnl1, Rest, Cybb, Pllp, Slc6a12, Gsn, Jmjd6, Tspo, Ptpn11, Slco1a4, Dab2ip, Ndufa5, Tap1, Hmgcr, Trappc6b, Abca1, Kcnb1, P2ry2, Pycard, S100a6, Ndufb6, Il1a, Exoc6b, Rbpj, Tmed10, Cd209a, Rab8a, Nr1i2, Ndufa4, Nphs1, Pea15a, Ndufb3, Xpo7, Snx6, Vdac3, Ergic3, Nat3, Fyttd1, Tlr2, Rhot1, Bnip3, Accn3, Psg22, Ndufb5, Smurf1, Hdlbp, Lyst, Acv…
GO:0006810	transport	0.13115 ( 296 of 2257 genes )	0.09306 ( 3165 of 34011 annotated genes )	5.22e-17	1.66e-13	Clec7a, Sec22b, Vps54, Rassf9, Ndufb7, Atp6v0c, Hsp90aa1, Txnl1, Rest, Cybb, Pllp, Slc6a12, Gsn, Jmjd6, Tspo, Ptpn11, Slco1a4, Dab2ip, Ndufa5, Tap1, Hmgcr, Trappc6b, Abca1, Kcnb1, P2ry2, Pycard, S100a6, Ndufb6, Il1a, Exoc6b, Rbpj, Tmed10, Cd209a, Rab8a, Nr1i2, Ndufa4, Nphs1, Pea15a, Ndufb3, Xpo7, Snx6, Vdac3, Ergic3, Nat3, Fyttd1, Tlr2, Rhot1, Bnip3, Accn3, Psg22, Ndufb5, Smurf1, Hdlbp, Lyst, Acv…
GO:0009056	catabolic process	0.07887 ( 178 of 2257 genes )	0.04828 ( 1642 of 34011 annotated genes )	4.538e-16	1.443e-12	Suclg1, Psmb10, Dnase1l3, Tuba8, Prdx6, Adh4, Ywhah, Psma3, Glb1, Atg13, Ccr7, Arhgap6, Atp6v0c, Hsp90aa1, Gpi1, Gspt1, Cnn3, Psmc4, Chi3l1, Acot2, Aldh3b1, Pcnp, Mdh2, Gch1, Ddhd1, Dab2ip, Mras, Tap1, Allc, Tbcc, Adam8, Dram1, Cyp2c65, Hdc, Tbc1d5, Tceb1, Tmed10, Pkm2, Psmb4, Nr1i2, Usp18, Gnai2, Scoc, Dpysl3, Larp1, Rnf4, Rap2c, Cycs, Pgam1, Usp36, Aldoc, Naalad2, Pla2g16, Psmd14, Aadat, Rhot1,…
GO:0019538	protein metabolic process	0.13912 ( 314 of 2257 genes )	0.10229 ( 3479 of 34011 annotated genes )	6.741e-16	2.144e-12	Anpep, Mapkapk2, Fkbp9, Psma3, Denr, Hsp90aa1, Eif4e, Rest, Tada2a, Ttn, Gspt1, Dgkh, Mapk6, Jmjd6, Ikbkap, Eif3k, Pcnp, Nupr1, Ptpn11, Adam7, Dab2ip, Serpinb8, Hmgcr, Abca1, Tbcc, Tceb1, Cops4, Rpn1, Myo3a, Rplp1, Mcpt8, Usp18, Gnai2, Dpp10, Adam24, Rnf4, Mrpl23, Leprel1, Usp36, Tlr2, Bnip3, Adam2, Mrpl39, Smurf1, Fkbp7, Fbxl5, 2010106G01Rik, Ctsl, Acvr2a, Tnik, Mtpn, Dusp6, Mipep, Polr2h, Psma5…
GO:0042221	response to chemical stim	0.09437 ( 213 of 2257 genes )	0.06392 ( 2174 of 34011 annotated genes )	2.437e-14	7.751e-11	Mir148a, Clec7a, Nfe2l2, Vmn1r208, Mirlet7f-2, Scn1b, Prdx6, Mapkapk2, Sva, Mir297-1, Mir133b, Ccr7, Xcl1, Hsp90aa1, Ccl7, Rest, Cysltr1, Cybb, Npepps, Ttn, Mir335, Gsn, Aldh1a1, Acot2, Vmn1r47, Aldh3b1, Nfkb1, Nupr1, Vmn1r231, Gch1, Ptpn11, Nr5a2, Papd7, Grin3a, Dab2ip, Hmgcr, Nlrc5, Abca1, Stat1, Gbp6, Adam8, Emx2, Pycard, Rps6ka4, Tnip3, Cyp2c65, Il1a, Vmn1r73, Nr1i2, Gm4951, Mir216b, Mir669c,…
GO:0006950	response to stress	0.08950 ( 202 of 2257 genes )	0.05977 ( 2033 of 34011 annotated genes )	3.158e-14	1.004e-10	Clec7a, Nfe2l2, Prdx6, Mapkapk2, Nlrp4a, Sbno2, Atg13, Ccr7, Xcl1, Hsp90aa1, Ccl7, Cysltr1, Cybb, Darc, Npepps, Clec4n, Aldh1a1, Acot2, Aldh3b1, Tspo, Cfp, Nfkb1, Reg3g, Nupr1, Gch1, Ptpn11, Dab2ip, Defb3, Tap1, Hmgcr, Nlrc5, Stat1, Gbp6, Plek, Adam8, Pycard, Rps6ka4, Tnip3, Tlr12, Prg2, Il1a, Gypa, Rbpj, Chaf1b, Slc2a1, Defb2, Pkm2, Psmb4, Nphs1, Scoc, Itgax, Fech, Larp1, Vdac3, Oas1a, Cycs, Gm1…
GO:0043170	macromolecule metabolic p	0.22331 ( 504 of 2257 genes )	0.18900 ( 6428 of 34011 annotated genes )	6.052e-14	1.925e-10	Nfe2l2, Anpep, Mapkapk2, 4930447C04Rik, Sbno2, Ddx56, Asz1, Fkbp9, Psma3, Mir133b, Denr, Hsp90aa1, Eif4e, Rest, Tada2a, Ttn, Gspt1, Dgkh, Mapk6, Jmjd6, Prpf4, Ikbkap, Eif3k, Zfp516, Pcnp, Nupr1, Ptpn11, Adam7, Lhx5, Prpf6, Papd7, Npas3, Dab2ip, 0610031J06Rik, Foxn3, Serpinb8, Hmgcr, Nlrc5, Abca1, Tbcc, Pycard, Tceb1, Cops4, Rpn1, Il1a, Rbpj, Chaf1b, Tmed10, Myo3a, Itih3, Rplp1, 2700060E02Rik, Nr1…
GO:0065007	biological regulation	0.30173 ( 681 of 2257 genes )	0.27182 ( 9245 of 34011 annotated genes )	1.567e-13	4.983e-10	Clec7a, Nfe2l2, Farp1, Mapkapk2, Olfr821, 4930447C04Rik, Lhb, Atp6v0c, Olfr196, Ccl7, Rest, Tada2a, Gpi1, Txndc9, Siglece, Cst7, Ttn, Rapgefl1, Dgkh, Gsn, Mapk6, Aldh1a1, Jmjd6, Tspo, Nupr1, Ptpn11, Prpf6, Dab2ip, Mras, Tap1, Nlrc5, Gypa, Rbpj, Chaf1b, Olfr1137, Nucb2, Olfr1341, Itih3, Cd209a, 2700060E02Rik, Wfdc6b, Cenpj, Pea15a, Vdac3, Snx6, Oas1a, Mir34c, Pla2g16, Pilra, Rhot1, Smurf1, 2010106…
GO:0009611	response to wounding	0.03589 ( 81 of 2257 genes )	0.01746 ( 594 of 34011 annotated genes )	9.04e-13	2.875e-09	Clec7a, Nfe2l2, Tnfrsf1b, Mapkapk2, Sbno2, Plaa, Ccr7, Xcl1, Cd44, Cyr61, Ccl7, Cysltr1, Darc, Serpinb9, C9, F5, Tnf, Reg3g, Nupr1, Fcgr3, Cd47, Apoe, Hmgcr, Ccr1, Fga, Plek, Adam8, Pycard, Rps6ka4, Tlr12, Il1a, Rbpj, Cd34, Pkm2, Psmb4, Cxcl1, Cx3cl1, Ccl12, Ppap2b, Prkca, Tlr2, Slc7a11, Vwf, Saa3, Ccl4, Fn1, Lyst, Thbs1, Cnr1, Ndel1, Hif1a, Ccl24, Calca, Serpinb2, Bcr, Mefv, Tlr1, Csf1, Pdgfa, A…
GO:0006952	defense response	0.04253 ( 96 of 2257 genes )	0.02246 ( 764 of 34011 annotated genes )	9.998e-13	3.179e-09	Clec7a, Tnfrsf1b, Mapkapk2, Nlrp4a, Sbno2, Plaa, Ccr7, Xcl1, Cd44, Ccl7, Cysltr1, Cybb, Ccl17, Darc, Serpinb9, Clec4n, C9, Ripk2, Tnf, Cfp, Reg3g, Nupr1, Gch1, Ecsit, Fcgr3, Cd47, Defb3, Tap1, Apoe, Trafd1, Ccr1, Nlrc5, Stat1, Gbp6, Adam8, Tmem173, Pycard, Rps6ka4, Tnip3, Tlr12, Pvr, Prg2, Il1a, Rbpj, Defb2, Psmb4, Trim30a, Cxcl1, Itgax, Vdac3, Oas1a, Dnaja3, Ccl12, Prkca, Tlr2, Bnip3, Clec4d, Sa…
GO:0051649	establishment of localiza	0.06203 ( 140 of 2257 genes )	0.03878 ( 1319 of 34011 annotated genes )	3.566e-12	1.134e-08	Sec22b, Vps54, Ipo7, Rassf9, Ywhah, Ccr7, Hsp90aa1, Rest, Clec4n, Chi3l1, Rab3c, Ptpn11, Dab2ip, Tap1, Hmgcr, Abca1, Plek, Pycard, Kpnb1, Il1a, Exoc6b, Rbpj, Tmed10, Rab8a, Xpo6, Snx6, Xpo7, Cx3cl1, Edn1, Fyttd1, Prl, Rhot1, Tlr2, Ucp2, Bnip3, Psg22, Smurf1, Tnpo3, Chmp5, Lyst, Acvr2a, Timm8a1, Txn1, Cnr1, Rrs1, Ica1, Ndel1, Hif1a, Akap13, Atp5o, Ifit1, Mrpl45, Ppp3cb, Kpna6, Exoc4, Pip5k1a, Pnp,…
GO:0006955	immune response	0.03722 ( 84 of 2257 genes )	0.01926 ( 655 of 34011 annotated genes )	9.204e-12	2.927e-08	Clec7a, Tnfrsf1b, Mapkapk2, Psen1, Sbno2, Ccr7, Xcl1, Cd44, Osm, Ccl7, Cybb, Cd38, Serpinb9, Lgals1, Clec4n, C9, Ripk2, Tnf, Cfp, Gch1, Ecsit, Clec4e, Fcgr3, Tap1, Trafd1, Ccr1, Nlrc5, Stat1, Gbp6, Adam8, Cx3cr1, Tmem173, Tnfsf10, Pycard, Pld2, Tnip3, Tlr12, Pvr, Prg2, Il1a, Rbpj, Psmb4, Trim30a, Cxcl1, Oas1a, Dnaja3, Cx3cl1, Ccl12, Tlr2, Clec4d, Rnf8, Ccl4, 2010106G01Rik, Lyst, C5ar1, Il18bp, Cd…
GO:0002376	immune system process	0.06026 ( 136 of 2257 genes )	0.03822 ( 1300 of 34011 annotated genes )	2.031e-11	6.457e-08	Clec7a, Psmb10, Mapkapk2, Sbno2, Ccr7, Xcl1, Hsp90aa1, Ccl7, Cybb, Lgals1, Clec4n, Jmjd6, Cfp, Nfkb1, Gch1, Tap1, Crip2, Nlrc5, Stat1, Gbp6, Adam8, Pycard, Tnip3, Tlr12, Prg2, Il1a, Rbpj, Cd209a, Psmb4, Itgax, Fech, Oas1a, Cx3cl1, Ccl12, Edn1, Spnb1, Tlr2, Bnip3, Clec4d, Psme2, Ccl4, Csf3r, 2010106G01Rik, Lyst, Acvr2a, Il18bp, Thbs1, Kdr, Cnr1, Cxcl9, Hif1a, Ifit1, Ppp3cb, Ube2n, Tlr1, Socs6, Sma…
GO:0051641	cellular localization	0.06823 ( 154 of 2257 genes )	0.04510 ( 1534 of 34011 annotated genes )	2.092e-11	6.653e-08	Bub1b, Sec22b, Vps54, Ipo7, Rassf9, Ywhah, Ccr7, Hsp90aa1, Rest, Clec4n, Chi3l1, Rab3c, Ptpn11, Dab2ip, Tln1, Tap1, Hmgcr, Abca1, Plek, Pycard, Kpnb1, Il1a, Exoc6b, Gypa, Rbpj, Tmed10, Rab8a, Xpo6, Snx6, Xpo7, Gm14160, Cx3cl1, Edn1, Fyttd1, Prl, Rhot1, Tlr2, Ucp2, Bnip3, Psg22, Smurf1, Tnpo3, Ppp2r5a, Chmp5, Lyst, Acvr2a, Timm8a1, Txn1, Cnr1, Rrs1, Ica1, Ndel1, Sumo3, Hif1a, Akap13, Atp5o, Ifit1,…
GO:0044248	cellular catabolic proces	0.06292 ( 142 of 2257 genes )	0.04055 ( 1379 of 34011 annotated genes )	2.232e-11	7.097e-08	Suclg1, Psmb10, Dnase1l3, Tuba8, Prdx6, Psma3, Atg13, Ccr7, Arhgap6, Atp6v0c, Hsp90aa1, Gpi1, Gspt1, Cnn3, Acot2, Aldh3b1, Pcnp, Mdh2, Gch1, Dab2ip, Mras, Tap1, Allc, Tbcc, Adam8, Dram1, Cyp2c65, Hdc, Tbc1d5, Tceb1, Psmb4, Nr1i2, Usp18, Gnai2, Scoc, Dpysl3, Larp1, Rnf4, Rap2c, Cycs, Pgam1, Usp36, Naalad2, Psmd14, Rhot1, Aadat, Bnip3, Psmb6, Smurf1, Smpdl3b, Fbxl5, Tbc1d2b, Cnr1, Srgap2, Ndel1, Su…
GO:0050789	regulation of biological	0.28356 ( 640 of 2257 genes )	0.25965 ( 8831 of 34011 annotated genes )	3.387e-11	1.077e-07	Clec7a, Nfe2l2, Farp1, Mapkapk2, Olfr821, 4930447C04Rik, Lhb, Olfr196, Ccl7, Rest, Tada2a, Gpi1, Txndc9, Siglece, Cst7, Ttn, Rapgefl1, Dgkh, Gsn, Mapk6, Aldh1a1, Jmjd6, Tspo, Nupr1, Ptpn11, Prpf6, Dab2ip, Mras, Tap1, Nlrc5, Gypa, Rbpj, Chaf1b, Olfr1137, Olfr1341, Itih3, Cd209a, 2700060E02Rik, Wfdc6b, Cenpj, Pea15a, Vdac3, Snx6, Oas1a, Mir34c, Pla2g16, Pilra, Rhot1, Smurf1, 2010106G01Rik, Tnik, Ol…
GO:0050896	response to stimulus	0.22907 ( 517 of 2257 genes )	0.20335 ( 6916 of 34011 annotated genes )	7.563e-11	2.405e-07	Clec7a, Nfe2l2, Mapkapk2, Olfr821, Olfr196, Ccl7, Rest, Siglece, Ttn, Rapgefl1, Dgkh, Gsn, Mapk6, Aldh1a1, Jmjd6, Tspo, Nupr1, Ptpn11, Papd7, Dab2ip, Mras, Tap1, Nlrc5, Gbp6, Gypa, Rbpj, Chaf1b, Olfr1137, Olfr1341, Pkm2, Gm4951, Mir669c, Cenpj, Pea15a, Vdac3, Snx6, Oas1a, Mir34c, Ccl12, Pilra, Rhot1, Smurf1, 2010106G01Rik, Mir331, Tnik, Olfr902, Cnr1, Srgap2, Ndel1, Cnksr2, Pip5k1a, Irgm1, Pnp, I…
GO:0044267	cellular protein metaboli	0.11077 ( 250 of 2257 genes )	0.08527 ( 2900 of 34011 annotated genes )	1.124e-10	3.573e-07	Sec11a, Bub1b, Psmb10, Mapkapk2, Fkbp9, Psma3, Ccr7, Denr, Hsp90aa1, Eif4e, Rest, Tada2a, Ttn, Gspt1, Chi3l1, Dgkh, Ppme1, Mapk6, Jmjd6, Ikbkap, Eif3k, Ppia, Pcnp, Mdh2, Nupr1, Ppap2a, Ptpn11, Dab2ip, Hmgcr, Abca1, Tbcc, Adam8, Rps6ka4, Tceb1, Cops4, Rpn1, Myo3a, Rplp1, Psmb4, Cish, Usp18, Gnai2, Pebp1, Fech, Rnf4, Rap2c, Mrpl23, Leprel1, Usp36, Edn1, Psmd14, Mlkl, Tlr2, Bnip3, St3gal5, Prlr, Psm…
GO:0006508	proteolysis	0.04608 ( 104 of 2257 genes )	0.02770 ( 942 of 34011 annotated genes )	2.645e-10	8.411e-07	Sec11a, Anpep, Psmb10, Adamts7, Dab2, Tnfrsf1b, Casp4, Psen1, Psma3, Senp5, Kel, Parl, Klk1b27, Npepps, Adamts3, Senp6, Serpinb9, Tnf, Adam9, Psmd10, Adam25, Dnajc3, Birc2, Pcnp, Adam7, Rnf180, Dub1, Tnfaip1, Bace2, Sec61b, Serpinb8, Apoe, Serpinh1, Usp31, Adam8, Adam15, Adamts5, Tceb1, Mmp19, Erap1, Pion, Mep1a, Psmb4, Mcpt8, Usp18, Dpp10, Adam24, Rnf4, Usp36, Naalad2, Psmd14, Sh3d19, Psmb6, Ada…
GO:0006954	inflammatory response	0.02393 ( 54 of 2257 genes )	0.01085 ( 369 of 34011 annotated genes )	4.278e-10	1.361e-06	Clec7a, Tlr2, Tnfrsf1b, Saa3, Mapkapk2, Sbno2, Ccl4, Plaa, Xcl1, Ccr7, Cd44, Ccl7, Cysltr1, Thbs1, Cnr1, Darc, Serpinb9, Hif1a, Ccl24, Tnf, Calca, Mefv, Bcr, Tlr1, Reg3g, Csf1, Nupr1, Fcgr3, Cd47, Apoe, Ccr1, Adam8, Crh, Pycard, Rps6ka4, Mif, Cd59b, Ccrl2, Tlr12, Fcgr2b, Il1a, Rbpj, P2rx1, Psmb4, Tgm2, Ier3, Stat3, Il1b, Ager, Cxcl1, Kit, Cd14, Ccl12, Prkca,
GO:0009057	macromolecule catabolic p	0.03234 ( 73 of 2257 genes )	0.01723 ( 586 of 34011 annotated genes )	7.763e-10	2.469e-06	Agl, Psmb10, Dnase1l3, Dab2, Tnfrsf1b, Psen1, Psma3, Cd44, Gspt1, Psmc4, Chi3l1, Ppt1, Tnf, Lsm5, Adam9, Psmd10, Dnajc3, Birc2, Pcnp, Dcps, Rnf180, Dub1, Tnfaip1, Sec61b, Apoe, Fbxo44, Adam8, Smg7, Tceb1, Pion, Tmed10, Ldlr, Psmb4, Trim30a, Usp18, Vip, Rnf4, Cycs, Usp36, Zfp36l2, Psmd14, Bnip3, Sh3d19, Psmb6, Pygl, Smurf1, Fbxl5, Gzma, Sumo3, Psma5, Afg3l1, Ube2n, Commd1, Psmb3, Psmc5, Socs6, Fkb…
GO:0044260	cellular macromolecule me	0.18830 ( 425 of 2257 genes )	0.16512 ( 5616 of 34011 annotated genes )	1.584e-09	5.038e-06	Nfe2l2, Mapkapk2, 4930447C04Rik, Sbno2, Ddx56, Asz1, Fkbp9, Psma3, Denr, Hsp90aa1, Eif4e, Rest, Tada2a, Ttn, Gspt1, Dgkh, Mapk6, Jmjd6, Prpf4, Ikbkap, Eif3k, Zfp516, Pcnp, Nupr1, Ptpn11, Lhx5, Prpf6, Papd7, Npas3, Dab2ip, 0610031J06Rik, Foxn3, Hmgcr, Nlrc5, Abca1, Tbcc, Pycard, Tceb1, Cops4, Rpn1, Il1a, Rbpj, Chaf1b, Tmed10, Myo3a, Rplp1, 2700060E02Rik, Nr1i2, Usp18, Gnai2, Snx6, Rnf4, Mrpl23, Le…
GO:0080134	regulation of response to	0.03013 ( 68 of 2257 genes )	0.01597 ( 543 of 34011 annotated genes )	2.362e-09	7.511e-06	Clec7a, Nfe2l2, Tnfrsf1b, Mapkapk2, Sbno2, Ccr7, Xcl1, Cd44, Stk3, Ripk2, Tnf, Psmd10, Dab2ip, Fcgr3, Cd47, Tap1, Apoe, Hmgcr, Trafd1, Ccr1, Nlrc5, Plek, Adam8, Tmem173, Pafah1b2, Pycard, Tnip3, Pvr, Il1a, Gypa, Cd34, Ltbr, Psmb4, Trim30a, Scoc, Fech, Larp1, Dnaja3, Ppap2b, Prkca, Edn1, Tlr2, Rnf8, Thbs1, Cd86, Cnr1, Myo1f, Ndel1, Ifit1, Ccl24, Calca, Ube2n, Bcr, Mefv, Pdgfa, Pnp, Gimap5, Spred2,…
GO:0045184	establishment of protein	0.04874 ( 110 of 2257 genes )	0.03111 ( 1058 of 34011 annotated genes )	2.53e-09	8.047e-06	Sec22b, Vps54, Timm23, Ipo7, Xpo5, Sar1a, Psen1, Ywhah, Gpr89, Rangap1, Ccr7, Hsp90aa1, Sar1b, Ehd1, Yif1a, Agxt, S100a13, Clec4n, Chi3l1, Ppt1, Tnf, Snx25, Rab3c, Adam9, Psmd10, Ptpn11, Lmf1, Dab2ip, Clec4e, Sec61b, Tap1, Abca1, l7Rn6, Plek, Chmp4b, Tmem173, 2610002M06Rik, Bcl2l1, Snx12, Pycard, Kpnb1, Il1a, Rbpj, Tmed10, Rab8a, Xpo6, Litaf, Sec61a1, Snap23, Xpo7, Snx6, Cx3cl1, Vps29, Snupn, Snx…
GO:0046907	intracellular transport	0.03943 ( 89 of 2257 genes )	0.02337 ( 795 of 34011 annotated genes )	2.652e-09	8.433e-06	Sec22b, Vps54, Timm23, Ipo7, Xpo5, Rassf9, Psen1, Ywhah, Chic2, Rangap1, Hsp90aa1, Sar1b, Ddx39, Ehd1, Agxt, Tnf, Rer1, Ehd2, Psmd10, Ptpn11, Lmf1, Dab2ip, Sec61b, Tap1, Abca1, l7Rn6, Tmem173, Bcl2l1, Kpnb1, Tmed10, Trdn, Rab8a, Xpo6, Trappc1, Litaf, Xpo7, Snx6, Vps29, Snupn, Fyttd1, Egr2, Prl, Snx4, Rhot1, Ap3s1, Tlr2, Ucp2, Bnip3, Stx8, Slc30a6, Smurf1, Tnpo3, Ipo13, Chmp5, Ranbp1, Lyst, Txnip,…
GO:0015031	protein transport	0.04696 ( 106 of 2257 genes )	0.02993 ( 1018 of 34011 annotated genes )	4.57e-09	1.453e-05	Sec22b, Vps54, Timm23, Ipo7, Xpo5, Sar1a, Psen1, Ywhah, Gpr89, Rangap1, Ccr7, Hsp90aa1, Sar1b, Ehd1, Yif1a, Agxt, S100a13, Clec4n, Chi3l1, Ppt1, Tnf, Snx25, Rab3c, Adam9, Psmd10, Ptpn11, Lmf1, Dab2ip, Clec4e, Sec61b, Tap1, Abca1, l7Rn6, Plek, Chmp4b, Tmem173, 2610002M06Rik, Snx12, Pycard, Kpnb1, Il1a, Rbpj, Tmed10, Rab8a, Xpo6, Litaf, Sec61a1, Snap23, Xpo7, Snx6, Cx3cl1, Vps29, Snupn, Snx4, Egr2,…
GO:0055114	oxidation-reduction proce	0.04342 ( 98 of 2257 genes )	0.02699 ( 918 of 34011 annotated genes )	5.011e-09	1.594e-05	Kdm3a, CYTB, Cox4i1, Suclg1, Agl, Akr1c14, Pcbd2, Ndufs3, Cyp51, Prdx6, Adh4, Ndufb7, Bbox1, Gm4847, Scd2, Aldh1a7, Cyc1, Txnl1, Ldha, Egln1, Ogfod1, Mosc2, Cybb, Ndufb9, Ndufs4, Tmx1, Aldh1a1, Fdft1, Jmjd6, Aox4, Aldh3b1, Plod3, Mthfd1l, Hibadh, Blvrb, Hpgd, Mdh2, Cyp3a57, Epx, Ndufa5, Hsdl1, Gys2, Hmgcr, Aldh18a1, Loxl2, Plod1, Lao1, Ndufb6, Cyp2c65, Retsat, Vat1l, Ndufa4, Ndufb3, Cycs, Pgam1, …
GO:0045087	innate immune response	0.01905 ( 43 of 2257 genes )	0.00826 ( 281 of 34011 annotated genes )	6.476e-09	2.06e-05	Clec7a, Tlr2, Clec4d, Mapkapk2, Xcl1, Lyst, Cd86, Cybb, Myo1f, Kynu, Clec4n, C9, Ripk2, Ifit1, Tlr1, Cfp, Csf1, Gch1, Irgm1, Il18r1, Clec5a, Ecsit, Iigp1, Tap1, Trafd1, Ccr1, Nlrc5, Stat1, Gimap5, Gbp6, Adam8, Tmem173, Sp110, Pycard, Mif, Tnip3, Pvr, Tlr12, Trim30a, Oas1a, Dnaja3, Fcnb, Cd14,
GO:0010033	response to organic subst	0.05848 ( 132 of 2257 genes )	0.04019 ( 1367 of 34011 annotated genes )	6.855e-09	2.18e-05	Mir148a, Clec7a, Nfe2l2, Vmn1r208, Mirlet7f-2, Mapkapk2, Sva, Mir297-1, Ccr7, Xcl1, Hsp90aa1, Ccl7, Rest, Aldh1a1, Vmn1r47, Gch1, Vmn1r231, Ptpn11, Nr5a2, Grin3a, Dab2ip, Hmgcr, Nlrc5, Abca1, Stat1, Gbp6, Pycard, Rps6ka4, Tnip3, Il1a, Vmn1r73, Nr1i2, Gm4951, Mir216b, Mir669c, Cx3cl1, Cxcr7, Tlr2, Prlr, Srsf3, Nedd8, Vmn1r28, Vmn1r43, Thbs1, Cnr1, Nr1d2, Ifit1, Ppp3cb, Tlr1, Smad5, Vmn1r227, Serpi…
GO:0044281	small molecule metabolic	0.08330 ( 188 of 2257 genes )	0.06304 ( 2144 of 34011 annotated genes )	8.463e-09	2.691e-05	Suclg1, Tuba8, Cyp51, Adh4, Atic, Asz1, Glb1, Lhb, Ccr7, Arhgap6, Atp6v0c, Hddc3, Hsp90aa1, Txnl1, Gpi1, Ak2, Gspt1, Cnn3, Dgkh, Ppme1, Aldh1a1, Jmjd6, Acot2, Mthfd1l, Mdh2, Ppap2a, Gch1, Ptpn11, Nr5a2, Galk2, Dab2ip, Mras, Tap1, Hmgcr, Abca1, Aldh18a1, Tbcc, Hemk1, Hdc, Tbc1d5, Retsat, Pkm2, Gnai2, Pebp1, Fech, Dpysl3, Oas1a, Rap2c, Pgam1, Aldoc, Edn1, Acly, Aadat, Rhot1, Degs1, Tmem195, Hdlbp, …
GO:0050794	regulation of cellular pr	0.26052 ( 588 of 2257 genes )	0.24345 ( 8280 of 34011 annotated genes )	9.657e-09	3.071e-05	Clec7a, Nfe2l2, Farp1, Mapkapk2, Olfr821, 4930447C04Rik, Lhb, Olfr196, Ccl7, Rest, Tada2a, Gpi1, Txndc9, Siglece, Ttn, Rapgefl1, Dgkh, Gsn, Mapk6, Aldh1a1, Jmjd6, Tspo, Nupr1, Ptpn11, Prpf6, Dab2ip, Mras, Tap1, Nlrc5, Rbpj, Chaf1b, Olfr1137, Olfr1341, Cd209a, 2700060E02Rik, Cenpj, Pea15a, Snx6, Pla2g16, Pilra, Rhot1, Smurf1, Tnik, Olfr902, Cnr1, Srgap2, Ndel1, Ankrd13c, Cnksr2, Pip5k1a, Pnp, Il18…
GO:0033036	macromolecule localizatio	0.06292 ( 142 of 2257 genes )	0.04475 ( 1522 of 34011 annotated genes )	1.605e-08	5.103e-05	Bub1b, Sec22b, Vps54, Ipo7, Ywhah, Ccr7, Chst11, Hsp90aa1, Clec4n, Chi3l1, Rab3c, Ptpn11, Prpf6, Dab2ip, Tln1, Tap1, Abca1, Plek, P2ry2, Snx12, Pycard, Kpnb1, Il1a, Gypa, Rbpj, Tmed10, Rab8a, Xpo6, Snx6, Xpo7, Cx3cl1, Fyttd1, Prl, Tlr2, Psg22, Nedd8, Smurf1, Tnpo3, Ppp2r5a, Hdlbp, Chmp5, Vps53, Rab44, Lyst, Timm8a1, Hspg2, Txn1, Thbs1, Sumo3, Ifit1, Mrpl45, Ankrd13c, Kpna6, Dmbt1, Exoc4, Ddx4, Pi…
GO:0046483	heterocycle metabolic pro	0.04431 ( 100 of 2257 genes )	0.02846 ( 968 of 34011 annotated genes )	1.866e-08	5.935e-05	Pcbd2, Tuba8, Nme5, Tbc1d8, Atic, Nme4, Lhb, Ccr7, Arhgap6, Atp6v0c, Hddc3, Hsp90aa1, Ldha, Atp5b, Ak2, Cnn3, Gnai3, Dock4, Atp5f1, Dpysl2, Ak4, Mthfd1l, Blvrb, Hibadh, Mdh2, Gch1, Dab2ip, Nampt, Mras, Tap1, Apoe, Allc, Abca1, Aldh18a1, Rhoa, Tbcc, Cyp2c65, Hdc, Tbc1d5, Rnf213, Pkm2, Abcg2, Gnai2, Vip, Dpysl3, Fech, Oas1a, Rap2c, Pgam1, Edn1, Ctps, Spnb1, Macrod2, Rhot1, Aadat, Nppa, Pygl, Nudt9,…
GO:0051716	cellular response to stim	0.18432 ( 416 of 2257 genes )	0.16486 ( 5607 of 34011 annotated genes )	2.84e-08	9.032e-05	Clec7a, Nfe2l2, Olfr707, Prdx6, Rassf9, Mapkapk2, Olfr821, Olfr740, Sva, Olfr196, Olfr263-ps1, Olfr1457, Ccl7, Rest, Siglece, Ttn, Rapgefl1, Dgkh, Gsn, Mapk6, Jmjd6, Ikbkap, Vmn1r47, Olfr787, Olfr187, Nupr1, Ptpn11, Dab2ip, 0610031J06Rik, Mras, Hmgcr, Nlrc5, Abca1, Olfr837, Gbp6, P2ry2, Pycard, Tlr12, Il1a, Rbpj, Chaf1b, Rgs6, Olfr1137, Olfr1341, Rab8a, Nr1i2, Gm4951, Nphs1, Gnai2, Mir216b, Mir66…
GO:0008104	protein localization	0.05583 ( 126 of 2257 genes )	0.03893 ( 1324 of 34011 annotated genes )	3.508e-08	0.0001115	Bub1b, Tmsb10, Sec22b, Vps54, Timm23, Ipo7, Xpo5, Sar1a, Psen1, Ywhah, Gpr89, Rangap1, Ccr7, Hsp90aa1, Sar1b, Ehd1, Yif1a, Agxt, S100a13, Clec4n, Chi3l1, Ppt1, Tnf, Snx25, Mapksp1, Rab3c, Armcx3, Plod3, Adam9, Psmd10, Ptpn11, Lmf1, Dab2ip, Clec4e, Tln1, Sec61b, Tap1, Abca1, l7Rn6, Plek, Chmp4b, Tmem173, 2610002M06Rik, Bcl2l1, Snx12, Pycard, Kpnb1, Diap1, Il1a, Gypa, Rbpj, Tmed10, Rab8a, Xpo6, Lit…
GO:0070887	cellular response to chem	0.04741 ( 107 of 2257 genes )	0.03152 ( 1072 of 34011 annotated genes )	3.589e-08	0.0001141	Mir148a, Nfe2l2, Kdm3a, Mirlet7f-2, Higd1a, Ptpn1, Prdx6, Tnfrsf1b, Mir196a-1, Sva, Mir297-1, Ccr7, Xcl1, Mir322, Eno1, Cd44, Ccl7, Rest, Npepps, Ripk2, Gsn, Ppp2r5d, Dock4, Tnf, Pou3f2, Mapksp1, Aldh3b1, Dnajc3, Ptpn11, Nr5a2, Dab2ip, Epx, Fcgr3, Mir101b, Hmgcr, Ccr1, Nlrc5, Abca1, Csf2rb2, Stat1, Smad1, Gbp6, Adam8, Cx3cr1, Tmem173, Bcl2l1, Pycard, Rps6ka4, Diap1, Il1a, Nr1i2, Gm4951, Mir216b, …
GO:0030163	protein catabolic process	0.02393 ( 54 of 2257 genes )	0.01235 ( 420 of 34011 annotated genes )	4.227e-08	0.0001344	Psmd14, Psmb10, Bnip3, Dab2, Tnfrsf1b, Sh3d19, Psmb6, Psen1, Smurf1, Psma3, Fbxl5, Gzma, Sumo3, Psma5, Psmc4, Ppt1, Tnf, Afg3l1, Commd1, Ube2n, Psmb3, Adam9, Psmd10, Dnajc3, Psmc5, Birc2, Pcnp, Socs6, Dub1, Rnf180, Tnfaip1, Sec61b, Apoe, Fbxo44, Afg3l2, Anapc10, Adam8, Tgfb1i1, Isg15, Psma6, Tceb1, Usp25, Psmb2, Gja1, Snx1, Psmb4, Trim30a, Ier3, Usp18, Il1b, Psmb7, Vip, Rnf4, Usp36,
GO:0031347	regulation of defense res	0.01817 ( 41 of 2257 genes )	0.00826 ( 281 of 34011 annotated genes )	5.655e-08	0.0001798	Clec7a, Tlr2, Tnfrsf1b, Mapkapk2, Sbno2, Xcl1, Ccr7, Cd86, Cnr1, Myo1f, Ripk2, Ifit1, Ccl24, Tnf, Calca, Mefv, Bcr, Fcgr3, Cd47, Apoe, Tap1, Trafd1, Ccr1, Nlrc5, Gimap5, Adam8, Tmem173, Pycard, Mif, Tnip3, Cd59b, Fcgr2b, Pvr, Psmb4, Trim30a, Ier3, Tgm2, Il1b, Ager, Dnaja3, Prkca,
GO:0048584	positive regulation of re	0.04209 ( 95 of 2257 genes )	0.02729 ( 928 of 34011 annotated genes )	6.508e-08	0.000207	Clec7a, Dab2, Mapkapk2, Psen1, Ccr7, Xcl1, Cd44, Cyr61, Osm, Stk3, Cd38, A430084P05Rik, S100a13, Lgals1, Clec4n, C9, Chi3l1, Ripk2, Ppp2r5d, Tnf, Mapksp1, Cfp, Nfkb1, Ptpn11, Dab2ip, Fcgr3, Cd47, Tap1, Hmgcr, Ccr1, Nlrc5, Adam8, Tmem173, Pafah1b2, Pycard, Pld2, Tnip3, Pvr, Il1a, Rbpj, Eef1d, Ltbr, Trim30a, Litaf, Scoc, Cenpj, Pebp1, Larp1, Cx3cl1, Ppap2b, Prkca, Edn1, Prl, Tlr2, Rnf8, Ccl4, Acvr2…
GO:0006509	membrane protein ectodoma	0.00532 ( 12 of 2257 genes )	0.00097 ( 33 of 34011 annotated genes )	1.624e-07	0.0005165	Erap1, Bace2, Tnfrsf1b, Sh3d19, Apoe, Psen1, Il1b, Tnf, 2010106G01Rik, Myh9, Adam8, Adam9,
GO:0034097	response to cytokine stim	0.01905 ( 43 of 2257 genes )	0.00929 ( 316 of 34011 annotated genes )	2.033e-07	0.0006465	Cxcr7, Tnfrsf1b, Prlr, Xcl1, Ccr7, Ddost, Kynu, Ripk2, Ifit1, Csnk2b, Tnf, Ppp3cb, Adam9, Gch1, Dab2ip, Serpina3n, Iigp1, Fkbp1a, Ccr1, Nlrc5, Stat1, Csf2rb2, Gbp6, Tmem173, Cx3cr1, Pycard, Bcl2l1, Rps6ka4, Ccrl2, Rqcd1, Il1a, Il2rb, Gm4951, Stat3, Il1b, Ifit3, Robo1, Ifit2, Kit, Dnaja3, Cx3cl1, Csf2rb, Prkca,
GO:0060326	cell chemotaxis	0.01063 ( 24 of 2257 genes )	0.00368 ( 125 of 34011 annotated genes )	2.075e-07	0.0006598	Pip5k1a, Fcgr3, Cmklr1, Ccr1, Ccl4, Csf3r, Xcl1, Ccr7, Lyst, Adam8, C5ar1, Cx3cr1, Ccl7, Ccl6, Il1b, Ccl24, Dock4, Calca, Cxcl1, Kit, Cx3cl1, Ccl12, Edn1, Prkca,
GO:0048583	regulation of response to	0.07222 ( 163 of 2257 genes )	0.05548 ( 1887 of 34011 annotated genes )	2.305e-07	0.0007329	Clec7a, Nfe2l2, Mapkapk2, Sbno2, Ccr7, Xcl1, Chst11, Ttn, A430084P05Rik, Lgals1, Clec4n, Chi3l1, Cfp, Nfkb1, Ptpn11, Grin3a, Dab2ip, Tap1, Hmgcr, Nlrc5, Stat1, Plek, Adam8, Pycard, Tnip3, Tbc1d5, Il1a, Gypa, Rbpj, Rgs6, Psmb4, Cish, Scoc, Cenpj, Pebp1, Fech, Larp1, Snx6, Cx3cl1, Edn1, Prl, Tlr2, Fgd5, Smurf1, Ccl4, 2010106G01Rik, Acvr2a, Dusp6, Tbc1d2b, Thbs1, Kdr, Cnr1, Srgap2, Ndel1, Hif1a, Ifi…
GO:0048518	positive regulation of bi	0.11121 ( 251 of 2257 genes )	0.09382 ( 3191 of 34011 annotated genes )	3.622e-07	0.001152	Clec7a, Nfe2l2, Scn1b, Mapkapk2, Ywhah, Mir133b, Ets2, Ccr7, Xcl1, Hsp90aa1, Eif4e, Ccl7, Rest, Cysltr1, A430084P05Rik, Lamb1, Lgals1, Clec4n, Chi3l1, Aldh1a1, Tspo, Cfp, Sgip1, Nfkb1, Nupr1, Ptpn11, Lhx5, Prpf6, Nr5a2, Dab2ip, 0610031J06Rik, Tap1, Hmgcr, Crip2, Nlrc5, Abca1, Stat1, Plek, Adam8, P2ry2, Pycard, Rps6ka4, Tnip3, Tceb1, Il1a, Erap1, Rbpj, Rgs6, Myo3a, 2700060E02Rik, Nr1i2, Nphs1, Gna…
GO:0043065	positive regulation of ap	0.02703 ( 61 of 2257 genes )	0.01564 ( 532 of 34011 annotated genes )	3.638e-07	0.001157	Ndufs3, Bnip3, Casp4, Psen1, Xcl1, Txnip, Cd44, Lyst, Tm2d1, Gzma, Cyr61, Ldha, Rest, Senp1, Dusp6, Thbs1, Cnr1, Stk3, Niacr1, Klf11, Casp1, Serpinb9, Hif1a, C9, Ripk2, Tnf, Aldh1a1, Ppp3cb, Tspo, Rnf7, Nupr1, Pnp, Dab2ip, Fcgr3, Ctnnbl1, Tap1, Apoe, Hmgcr, Stat1, Gimap5, Rhoa, Adam8, Sav1, Fam162a, Tnfsf10, Bcl2l1, Sp110, Crh, Pycard, Pvr, Eef1e1, Tgm2, Ier3, Apaf1, Il1b, Ager, Ncoa1, Cycs, Dnaj…
GO:0048522	positive regulation of ce	0.10146 ( 229 of 2257 genes )	0.08441 ( 2871 of 34011 annotated genes )	4.499e-07	0.001431	Clec7a, Nfe2l2, Scn1b, Ywhah, Ets2, Ccr7, Xcl1, Hsp90aa1, Eif4e, Ccl7, Rest, A430084P05Rik, Lamb1, Lgals1, Clec4n, Chi3l1, Aldh1a1, Tspo, Sgip1, Nfkb1, Nupr1, Ptpn11, Lhx5, Prpf6, Nr5a2, Dab2ip, 0610031J06Rik, Tap1, Hmgcr, Crip2, Nlrc5, Abca1, Stat1, Plek, Adam8, P2ry2, Pycard, Rps6ka4, Tceb1, Il1a, Rbpj, Rgs6, Myo3a, 2700060E02Rik, Nr1i2, Nphs1, Gnai2, Scoc, Cenpj, Pebp1, Dpysl3, Larp1, Rnf4, Ra…
GO:0043068	positive regulation of pr	0.02703 ( 61 of 2257 genes )	0.01579 ( 537 of 34011 annotated genes )	5.007e-07	0.001592	Ndufs3, Bnip3, Casp4, Psen1, Xcl1, Txnip, Cd44, Lyst, Tm2d1, Gzma, Cyr61, Ldha, Rest, Senp1, Dusp6, Thbs1, Cnr1, Stk3, Niacr1, Klf11, Casp1, Serpinb9, Hif1a, C9, Ripk2, Tnf, Aldh1a1, Ppp3cb, Tspo, Rnf7, Nupr1, Pnp, Dab2ip, Fcgr3, Ctnnbl1, Tap1, Apoe, Hmgcr, Stat1, Gimap5, Rhoa, Adam8, Sav1, Fam162a, Tnfsf10, Bcl2l1, Sp110, Crh, Pycard, Pvr, Eef1e1, Tgm2, Ier3, Apaf1, Il1b, Ager, Ncoa1, Cycs, Dnaj…
GO:0016192	vesicle-mediated transpor	0.03545 ( 80 of 2257 genes )	0.02282 ( 776 of 34011 annotated genes )	5.322e-07	0.001693	Clec7a, Sec22b, Ptpn1, Vps54, Dab2, Sar1a, Psen1, Chic2, Ccr7, Sar1b, Rest, Ehd1, Atp5b, Yif1a, Ly75, Gnai3, Ppt1, Trappc6a, Gsn, Jmjd6, Rer1, Rab3c, Grk4, Ehd2, Dpysl2, Sgip1, Lmf1, Fcgr3, Cd47, Apoe, Trappc6b, Ccr1, Abca1, Plek, Pld2, Exoc6b, Tmed10, Ldlr, Cd209a, Rab8a, Trappc1, Snap23, Snx6, Ergic3, Clint1, Vps29, Prkca, Snx4, Ap3s1, Stx8, Slc30a6, Chmp5, Lyst, Ap1g1, D030016E14Rik, Thbs1, My…
GO:0071345	cellular response to cyto	0.01551 ( 35 of 2257 genes )	0.00709 ( 241 of 34011 annotated genes )	5.747e-07	0.001827	Cxcr7, Tnfrsf1b, Prlr, Xcl1, Ccr7, Ripk2, Ifit1, Csnk2b, Tnf, Dab2ip, Iigp1, Fkbp1a, Ccr1, Nlrc5, Stat1, Csf2rb2, Gbp6, Tmem173, Cx3cr1, Pycard, Rps6ka4, Ccrl2, Il1a, Rqcd1, Il2rb, Gm4951, Stat3, Il1b, Ifit3, Robo1, Ifit2, Kit, Dnaja3, Cx3cl1, Csf2rb,
GO:0030595	leukocyte chemotaxis	0.00930 ( 21 of 2257 genes )	0.00309 ( 105 of 34011 annotated genes )	5.787e-07	0.00184	Fcgr3, Cmklr1, Ccr1, Ccl4, Csf3r, Xcl1, Ccr7, Lyst, Adam8, C5ar1, Cx3cr1, Ccl7, Il1b, Ccl24, Calca, Cxcl1, Kit, Cx3cl1, Ccl12, Edn1, Prkca,
GO:0052548	regulation of endopeptida	0.01595 ( 36 of 2257 genes )	0.00747 ( 254 of 34011 annotated genes )	7.254e-07	0.002307	Psmd14, Psme2, Cd44, Cflar, Cyr61, Rest, Pdcd6, Senp1, Gpi1, Thbs1, Cstb, Serpinb9, C9, Tnf, Serpinb2, Rnf7, Serpina3n, Serpinb8, Serpinh1, Rhoa, Prol1, Serpinb3a, Fam162a, Tnfsf10, Pycard, Bcl2l1, Serpinb11, P2rx1, Psme1, Csnk2a1, Apaf1, Xdh, Robo1, Cycs, Dnaja3, Serpinb3c,
GO:0050663	cytokine secretion	0.00798 ( 18 of 2257 genes )	0.00241 ( 82 of 34011 annotated genes )	8.744e-07	0.00278	Pnp, Tlr2, Clec5a, Clec4e, Psg22, Abca1, Ccr7, Pycard, Mif, Il1a, Rbpj, Casp1, S100a13, Chi3l1, Clec4n, Tnf, Cd14, Cx3cl1,
GO:0033619	membrane protein proteoly	0.00532 ( 12 of 2257 genes )	0.00112 ( 38 of 34011 annotated genes )	9.442e-07	0.003003	Erap1, Bace2, Tnfrsf1b, Sh3d19, Apoe, Psen1, Il1b, Tnf, 2010106G01Rik, Myh9, Adam8, Adam9,
GO:0042558	pteridine-containing comp	0.00487 ( 11 of 2257 genes )	0.00094 ( 32 of 34011 annotated genes )	1.03e-06	0.003275	Mthfd1, Mthfd1l, Qdpr, Gch1, Gphn, Pcbd2, Mocos, Aldh1l2, Atic, Folh1, Mocs2,
GO:0012501	programmed cell death	0.05627 ( 127 of 2257 genes )	0.04187 ( 1424 of 34011 annotated genes )	1.047e-06	0.003328	Bub1b, Hk2, Dnase1l3, Ndufs3, Higd1a, Nme5, Casp4, Psen1, Ywhah, Ccr7, Xcl1, Cd44, Tm2d1, Chst11, Cyr61, Osm, Ldha, Rest, Gpi1, Rassf6, Stk3, Niacr1, Parl, Cd38, Tex11, Serpinb9, Tsc22d3, C9, Ppt1, Ripk2, Gsn, Tmx1, Tnf, Aldh1a1, Jmjd6, Slc4a7, Tspo, Psmd10, Nfkb1, Birc2, Nupr1, Dab2ip, Fcgr3, Tap1, Apoe, Hmgcr, Stat1, Rhoa, Asah2, Adam8, Cx3cr1, Tnfsf10, Tmem173, Bcl2l1, Pycard, Dram1, Pvr, 1110…
GO:0071840	cellular component organi	0.12450 ( 281 of 2257 genes )	0.10864 ( 3695 of 34011 annotated genes )	1.179e-06	0.003748	Clec7a, Vps54, Prdx6, Ddx56, Atp6v0c, Hsp90aa1, Ccl7, Rest, Tada2a, Ttn, Dgkh, Gsn, Zmym4, Aldh1a1, Jmjd6, Dact2, Nsfl1c, Nupr1, Ptpn11, Prpf6, Papd7, Dab2ip, Hmgcr, Abca1, Kcnb1, Fam40b, Tbcc, P2ry2, Epb4.1, Il1a, Gypa, Rbpj, Chaf1b, Tmed10, Myo3a, Cd209a, Rab8a, Nphs1, Cenpj, Dpysl3, Mapre2, Rnf4, Daam1, Bnip3, Mrpl39, Lyst, Tnik, Mtpn, Hspg2, Cnr1, Rrs1, Srgap2, Ndel1, Ube2n, Exoc4, Pip5k1a, C…
GO:0010952	positive regulation of pe	0.00930 ( 21 of 2257 genes )	0.00323 ( 110 of 34011 annotated genes )	1.29e-06	0.004103	Psmd14, Rnf7, Psme2, Rhoa, Fn1, Fam162a, Tnfsf10, Cyr61, Pycard, Rest, Pdcd6, Senp1, P2rx1, Psme1, C9, Xdh, Apaf1, Tnf, Robo1, Cycs, Dnaja3,
GO:0010942	positive regulation of ce	0.02703 ( 61 of 2257 genes )	0.01626 ( 553 of 34011 annotated genes )	1.338e-06	0.004255	Ndufs3, Bnip3, Casp4, Psen1, Xcl1, Txnip, Cd44, Lyst, Tm2d1, Gzma, Cyr61, Ldha, Rest, Senp1, Dusp6, Thbs1, Cnr1, Stk3, Niacr1, Klf11, Casp1, Serpinb9, Hif1a, C9, Ripk2, Tnf, Aldh1a1, Ppp3cb, Tspo, Rnf7, Nupr1, Pnp, Dab2ip, Fcgr3, Ctnnbl1, Tap1, Apoe, Hmgcr, Stat1, Gimap5, Rhoa, Adam8, Sav1, Fam162a, Tnfsf10, Bcl2l1, Sp110, Crh, Pycard, Pvr, Eef1e1, Tgm2, Ier3, Apaf1, Il1b, Ager, Ncoa1, Cycs, Dnaj…
GO:0051044	positive regulation of me	0.00310 ( 7 of 2257 genes )	0.00035 ( 12 of 34011 annotated genes )	1.356e-06	0.004313	Il1b, Tnf, Tnfrsf1b, Sh3d19, Adam8, Adam9, Apoe,
GO:0016265	death	0.05848 ( 132 of 2257 genes )	0.04422 ( 1504 of 34011 annotated genes )	1.491e-06	0.004742	Bub1b, Dnase1l3, Ywhah, Ccr7, Xcl1, Chst11, Rest, Gpi1, Rassf6, Parl, Gsn, Aldh1a1, Jmjd6, Slc4a7, Tspo, Nfkb1, Nupr1, Dab2ip, Tap1, Hmgcr, Stat1, Adam8, Pycard, Dram1, Pkm2, Pea15a, Cycs, Cx3cl1, Aldoc, Edn1, Cxcr7, Rhot1, Bnip3, Pdcd5, Lyst, Dusp6, Thbs1, Kdr, Cnr1, Hif1a, Ankrd13c, Tmem85, Ppp3cb, Tox3, Rnf7, Pnp, Ctnnbl1, Pdcd11, Sp110, Mif, P2rx1, Aipl1, Ier3, Il1b, Ager, Robo1, Ncoa1, Hk2, …
GO:0050900	leukocyte migration	0.01152 ( 26 of 2257 genes )	0.00465 ( 158 of 34011 annotated genes )	1.498e-06	0.004762	Tlr2, Fcgr3, Cmklr1, Ccr1, Ccl4, Csf3r, Xcl1, Ccr7, Lyst, Adam8, C5ar1, Cx3cr1, Ccl7, Cd34, Il1b, Ccl24, Tnf, Calca, Aimp1, Cxcl1, Icam1, Kit, Cx3cl1, Ccl12, Prkca, Edn1,
GO:0007165	signal transduction	0.15330 ( 346 of 2257 genes )	0.13851 ( 4711 of 34011 annotated genes )	1.536e-06	0.004885	Clec7a, Nfe2l2, Olfr707, Rassf9, Mapkapk2, Olfr821, Olfr740, Olfr196, Olfr263-ps1, Olfr1457, Siglece, Ttn, Rapgefl1, Dgkh, Gsn, Mapk6, Jmjd6, Ikbkap, Vmn1r47, Olfr787, Olfr187, Nupr1, Ptpn11, Dab2ip, 0610031J06Rik, Mras, Hmgcr, Nlrc5, Abca1, Olfr837, P2ry2, Pycard, Tlr12, Il1a, Rbpj, Rgs6, Olfr1137, Olfr1341, Rab8a, Nr1i2, Nphs1, Gnai2, Cenpj, Pea15a, Snx6, Tas2r136, Pilra, Cxcr7, Tlr2, Rhot1, Ol…
GO:0052547	regulation of peptidase a	0.01861 ( 42 of 2257 genes )	0.00967 ( 329 of 34011 annotated genes )	1.553e-06	0.00494	Psmd14, Psme2, Cd44, Cflar, Fn1, Cyr61, Rest, Pdcd6, Senp1, Gpi1, Thbs1, Stfa3, Cst7, Cstb, Serpinb9, C9, Tnf, Serpinb2, Rnf7, Serpina3n, Serpinb8, Serpinh1, Rhoa, Prol1, Serpinb3a, Fam162a, Tnfsf10, Bcl2l1, Pycard, Serpinb11, P2rx1, Psme1, Itih3, Wfdc6b, Csnk2a1, Apaf1, Xdh, Pebp1, Robo1, Cycs, Dnaja3, Serpinb3c,
GO:0007249	I-kappaB kinase/NF-kappaB	0.01196 ( 27 of 2257 genes )	0.00497 ( 169 of 34011 annotated genes )	1.714e-06	0.005451	Tlr2, Dab2ip, Pdcd11, Fkbp1a, Stat1, Rhoa, Tnip3, Il1a, Tank, Gja1, Eef1d, S100a13, Lgals1, Clec4n, Tgm2, Chi3l1, Litaf, Ripk2, Il1b, Zdhhc17, Trim38, Tnf, Ikbkap, Ube2n, Dnaja3, Tlr1, Psmd10,
GO:0006629	lipid metabolic process	0.04032 ( 91 of 2257 genes )	0.02779 ( 945 of 34011 annotated genes )	1.735e-06	0.005519	Sult1d1, Cyp51, Prdx6, Adh4, Ywhah, Scd2, Pgs1, Gbgt1, Cyr61, Rest, Ebp, Atp5b, Elovl3, Niacr1, Ppt1, Dgkh, Tnf, Aldh1a1, Fdft1, Plbd1, Agk, Acot2, Nphp3, Elovl2, Tspo, Hpgd, Ppap2a, Ptpn11, Nr5a2, Ddhd1, Lmf1, Apoe, Hmgcr, Mboat1, Abca1, Plek, Asah2, Pafah1b2, Pld2, Pip5kl1, Cyp2c65, Retsat, Il1a, Ldlr, Sgms2, Fech, Ppap2b, Pla2g16, Edn1, Acly, Alg9, Degs1, Ppp2r5a, Tmem195, Smpdl3b, Hdlbp, Lyst…
GO:0016477	cell migration	0.03367 ( 76 of 2257 genes )	0.02199 ( 748 of 34011 annotated genes )	1.757e-06	0.005586	Nck1, Psen1, Ccr7, Xcl1, Cd44, Hsp90aa1, Cyr61, Tns3, Ccl7, Atp5b, Lamb1, Dock4, Tnf, Pou3f2, Tspo, Adam9, Tnfaip1, Fcgr3, Cd47, Apoe, Ccr1, Fam40b, Rhoa, Loxl2, Adam8, P2ry2, Cx3cr1, Emx2, Pld2, Pvr, Diap1, Cd34, Cxcl1, Dpysl3, Rap2c, Cx3cl1, Ccl12, Zfp640, Ppap2b, Prkca, Edn1, Tlr2, Ccl4, Csf3r, Lamc1, Lyst, Vcan, C5ar1, Thbs1, Kdr, Srgap2, Myo1f, Ndel1, Hif1a, Ccl24, Csnk2b, Calca, Amotl1, Bcr…
GO:0032103	positive regulation of re	0.01063 ( 24 of 2257 genes )	0.00412 ( 140 of 34011 annotated genes )	1.775e-06	0.005644	Cd47, Fcgr3, Cmklr1, Ccr1, Xcl1, Ccr7, Adam8, Pafah1b2, Mif, Thbs1, Kdr, Cnr1, Ndel1, Tgm2, Il1b, Ccl24, Scarf1, Tnf, Scoc, Ager, Larp1, Cx3cl1, Prkca, Edn1,
GO:0008219	cell death	0.05804 ( 131 of 2257 genes )	0.04399 ( 1496 of 34011 annotated genes )	1.838e-06	0.005844	Bub1b, Dnase1l3, Ywhah, Ccr7, Xcl1, Chst11, Rest, Gpi1, Rassf6, Parl, Gsn, Aldh1a1, Jmjd6, Slc4a7, Tspo, Nfkb1, Nupr1, Dab2ip, Tap1, Hmgcr, Stat1, Adam8, Pycard, Dram1, Pkm2, Pea15a, Cycs, Cx3cl1, Aldoc, Edn1, Cxcr7, Rhot1, Bnip3, Pdcd5, Lyst, Dusp6, Thbs1, Kdr, Cnr1, Hif1a, Ankrd13c, Tmem85, Ppp3cb, Tox3, Rnf7, Pnp, Ctnnbl1, Pdcd11, Sp110, Mif, P2rx1, Aipl1, Ier3, Il1b, Ager, Robo1, Ncoa1, Hk2, …
GO:0042559	pteridine-containing comp	0.00399 ( 9 of 2257 genes )	0.00065 ( 22 of 34011 annotated genes )	1.852e-06	0.005891	Mthfd1, Mthfd1l, Qdpr, Gch1, Gphn, Pcbd2, Mocos, Atic, Mocs2,
GO:0009607	response to biotic stimul	0.02836 ( 64 of 2257 genes )	0.01752 ( 596 of 34011 annotated genes )	1.855e-06	0.0059	Clec7a, Nfe2l2, Ptpn1, Tnfrsf1b, Mapkapk2, Xcl1, Ccr7, Hsp90aa1, Serpinb9, Clec4n, Ripk2, Tnf, Adam9, Dnajc3, Gch1, Cd47, Defb3, Ccr1, Abca1, Stat1, Gbp6, Tmem173, Bcl2l1, Pycard, Tnip3, Ppp1r15b, Prg2, Pvr, Rbpj, Mir484, Tmbim6, Defb2, Litaf, Itgax, Oas1a, Ifit2, Prkca, Tlr2, Bnip3, Lyst, Txnip, C5ar1, Ddx1, Cd86, Cnr1, Cxcl9, Myo1f, Casp1, Mir217, Ifit1, Bcr, Tlr1, Clec5a, Iigp1, Sp110, Isg15, …
GO:0006915	apoptosis	0.05494 ( 124 of 2257 genes )	0.04131 ( 1405 of 34011 annotated genes )	2.366e-06	0.007525	Bub1b, Hk2, Dnase1l3, Ndufs3, Higd1a, Nme5, Casp4, Psen1, Ywhah, Ccr7, Xcl1, Cd44, Tm2d1, Chst11, Cyr61, Osm, Ldha, Rest, Gpi1, Rassf6, Stk3, Niacr1, Parl, Cd38, Tex11, Serpinb9, Tsc22d3, C9, Ppt1, Ripk2, Gsn, Tmx1, Tnf, Aldh1a1, Jmjd6, Tspo, Psmd10, Nfkb1, Birc2, Nupr1, Dab2ip, Fcgr3, Tap1, Apoe, Hmgcr, Stat1, Rhoa, Asah2, Adam8, Cx3cr1, Tnfsf10, Tmem173, Bcl2l1, Pycard, Dram1, Pvr, 1110007C09Ri…
GO:0030335	positive regulation of ce	0.01418 ( 32 of 2257 genes )	0.00659 ( 224 of 34011 annotated genes )	2.465e-06	0.007839	Csf1, Pdgfa, Tlr2, Cmklr1, Ccr1, Xcl1, Ccr7, Adam8, P2ry2, Cyr61, Ccl7, Plau, Mif, Pld2, Thbs1, Kdr, Diap1, Myo1f, Lamb1, Hif1a, Ccl24, Ager, Amotl1, Icam1, Kit, Adam9, Cx3cl1, Zfp640, Ppap2b, Prkca, Map2k1, Edn1,
GO:0032101	regulation of response to	0.01861 ( 42 of 2257 genes )	0.00991 ( 337 of 34011 annotated genes )	2.893e-06	0.009201	Nfe2l2, Tnfrsf1b, Sbno2, Xcl1, Ccr7, Thbs1, Kdr, Cnr1, Ndel1, Ccl24, Tnf, Calca, Fabp7, Mefv, Bcr, Pdgfa, Grin3a, Fcgr3, Cd47, Apoe, Cmklr1, Hmgcr, Ccr1, Plek, Adam8, Pafah1b2, Mif, Cd59b, Fcgr2b, Cd34, Psmb4, Tgm2, Ier3, Il1b, Scarf1, Scoc, Robo1, Ager, Larp1, Cx3cl1, Edn1, Prkca,
GO:0044282	small molecule catabolic	0.03367 ( 76 of 2257 genes )	0.02235 ( 760 of 34011 annotated genes )	3.16e-06	0.01005	Hk2, Tuba8, Tbc1d8, Adh4, Glb1, Ccr7, Arhgap6, Atp6v0c, Hsp90aa1, Ldha, Atp5b, Gpi1, Agxt, Cnn3, Gnai3, Dock4, Atp5f1, Acot2, Bpgm, Dpysl2, Hibadh, Gch1, Dab2ip, Mras, Tap1, Rhoa, Tbcc, Lao1, BC026590, Hdc, Tbc1d5, Rnf213, Pkm2, Gnai2, Dpysl3, Rap2c, Pgam1, Aldoc, Rhot1, Aadat, Nudt9, Gnb4, Mthfd1, Tbc1d2b, Cnr1, Srgap2, Ndel1, Aldoa, Kynu, Hif1a, Atp5o, Ccl24, Rragc, Rfc3, Pgm2, Psmc5, Abcc5, Pi…
GO:0023052	signaling	0.16216 ( 366 of 2257 genes )	0.14883 ( 5062 of 34011 annotated genes )	3.168e-06	0.01007	Clec7a, Nfe2l2, Olfr707, Rassf9, Mapkapk2, Olfr821, Olfr740, Olfr196, Olfr263-ps1, Olfr1457, Rest, Siglece, Ttn, Rapgefl1, Dgkh, Gsn, Mapk6, Jmjd6, Ikbkap, Vmn1r47, Olfr787, Olfr187, Nupr1, Ptpn11, Lhx5, Dab2ip, 0610031J06Rik, Mras, Hmgcr, Nlrc5, Abca1, Olfr837, P2ry2, Pycard, Tlr12, Il1a, Rbpj, Rgs6, Olfr1137, Olfr1341, Rab8a, Nr1i2, Nphs1, Gnai2, Cenpj, Pea15a, Vdac3, Snx6, Tas2r136, Pilra, Cxc…
GO:0006807	nitrogen compound metabol	0.15286 ( 345 of 2257 genes )	0.13916 ( 4733 of 34011 annotated genes )	3.184e-06	0.01013	Nfe2l2, Mapkapk2, 4930447C04Rik, Sbno2, Atic, Ddx56, Asz1, Lhb, Atp6v0c, Hsp90aa1, Rest, Tada2a, Ak2, Gspt1, Jmjd6, Prpf4, Ikbkap, Tspo, Zfp516, Mthfd1l, Lhx5, Prpf6, Papd7, Npas3, Dab2ip, 0610031J06Rik, Foxn3, Mras, Tap1, Nlrc5, Abca1, Tbcc, Pycard, Tceb1, Il1a, Rbpj, Chaf1b, Itih3, 2700060E02Rik, Pkm2, Nr1i2, Gnai2, Dpysl3, Snx6, Oas1a, Rnf4, Hivep1, Tlr2, Rhot1, Bnip3, Srsf3, Mtpn, Tsen2, Gemi…
GO:0019221	cytokine-mediated signali	0.01196 ( 27 of 2257 genes )	0.00515 ( 175 of 34011 annotated genes )	3.396e-06	0.0108	Cxcr7, Tnfrsf1b, Prlr, Iigp1, Fkbp1a, Ccr1, Nlrc5, Csf2rb2, Stat1, Ccr7, Cx3cr1, Pycard, Rps6ka4, Ccrl2, Rqcd1, Il1a, Il2rb, Stat3, Ripk2, Il1b, Csnk2b, Tnf, Robo1, Kit, Dnaja3, Cx3cl1, Csf2rb,
GO:0043412	macromolecule modificatio	0.08241 ( 186 of 2257 genes )	0.06795 ( 2311 of 34011 annotated genes )	3.432e-06	0.01091	Bub1b, Mapkapk2, Asz1, Fkbp9, Ccr7, Rest, Tada2a, Ttn, Gspt1, Chi3l1, Dgkh, Ppme1, Mapk6, Jmjd6, Ikbkap, Ppia, Pcnp, Mdh2, Nupr1, Ppap2a, Ptpn11, Dab2ip, Hmgcr, Abca1, Adam8, Rps6ka4, Cops4, Rpn1, Myo3a, Cish, Usp18, Gnai2, Pebp1, Fech, Rnf4, Rap2c, Leprel1, Edn1, Mlkl, Tlr2, St3gal5, Prlr, Nedd8, Smurf1, Ppp2r5a, Fkbp7, Fkbp2, Fbxl5, Acvr2a, Tnik, Dusp6, Kdr, Thbs1, Gm7168, Polr2g, Sumo3, Polr2h…
GO:0006091	generation of precursor m	0.01684 ( 38 of 2257 genes )	0.00864 ( 294 of 34011 annotated genes )	3.557e-06	0.01131	Hk2, CYTB, Suclg1, Agl, Ndufs3, Ndufb5, Pygl, Ndufb7, Cyc1, Txnl1, Ldha, Gpi1, Txn1, Cybb, Ndufb9, Aldoa, Hif1a, Ndufs4, Tmx1, Ndufs6, Bpgm, Pgm2, Mdh2, Ndufa5, Gys2, Ndufb6, Mif, Pkm2, Ndufa4, Ier3, Ndufb3, Pgk1, Ero1l, Cycs, Glrx2, Pgam1, Cs, Aldoc,
GO:2000147	positive regulation of ce	0.01418 ( 32 of 2257 genes )	0.00673 ( 229 of 34011 annotated genes )	3.972e-06	0.01263	Csf1, Pdgfa, Tlr2, Cmklr1, Ccr1, Xcl1, Ccr7, Adam8, P2ry2, Cyr61, Ccl7, Plau, Mif, Pld2, Thbs1, Kdr, Diap1, Myo1f, Lamb1, Hif1a, Ccl24, Ager, Amotl1, Icam1, Kit, Adam9, Cx3cl1, Zfp640, Ppap2b, Prkca, Map2k1, Edn1,
GO:0065009	regulation of molecular f	0.06646 ( 150 of 2257 genes )	0.05272 ( 1793 of 34011 annotated genes )	4.251e-06	0.01352	Farp1, 4930447C04Rik, Tmem225, Ccr7, Xcl1, Arhgap6, Rest, Gpi1, Cst7, Ttn, Cnn3, Chi3l1, Dgkh, Nfkb1, Gch1, Ptpn11, Dab2ip, Foxn3, Serpinb8, Hmgcr, Nlrc5, Prol1, Plek, Adam8, Pycard, Tbc1d5, Epb4.1, Itih3, Wfdc6b, Cish, Gnai2, Pebp1, Rap2c, Cycs, Edn1, Psmd14, Tlr2, Psme2, Prlr, Ppp2r5a, Acvr2a, Tnik, Mtpn, Dusp6, Txn1, Tbc1d2b, Thbs1, Cnr1, Ica1, Srgap2, Ndel1, Cstb, Hif1a, Akap13, Ifit1, Ube2n,…
GO:0009058	biosynthetic process	0.13912 ( 314 of 2257 genes )	0.12543 ( 4266 of 34011 annotated genes )	4.365e-06	0.01388	Nfe2l2, Cyp51, 4930447C04Rik, Sbno2, Atic, Denr, Hsp90aa1, Eif4e, Rest, Tada2a, Gpi1, Ak2, Cybb, Gspt1, Aldh1a1, Jmjd6, Ikbkap, Eif3k, Tspo, Zfp516, Mthfd1l, Lhx5, Prpf6, Papd7, Npas3, Dab2ip, 0610031J06Rik, Foxn3, Hmgcr, Nlrc5, Abca1, Mboat1, Pycard, Tceb1, Rpn1, Il1a, Rbpj, Chaf1b, Rplp1, 2700060E02Rik, Pkm2, Nr1i2, Gnai2, Sgms2, Snx6, Oas1a, Rnf4, Mrpl23, Pla2g16, Hivep1, Acly, Tlr2, Degs1, Mr…
GO:0006464	protein modification proc	0.07975 ( 180 of 2257 genes )	0.06563 ( 2232 of 34011 annotated genes )	4.422e-06	0.01406	Bub1b, Mapkapk2, Fkbp9, Ccr7, Rest, Tada2a, Ttn, Gspt1, Chi3l1, Dgkh, Ppme1, Mapk6, Jmjd6, Ikbkap, Ppia, Pcnp, Mdh2, Nupr1, Ppap2a, Ptpn11, Dab2ip, Hmgcr, Abca1, Adam8, Rps6ka4, Cops4, Rpn1, Myo3a, Cish, Usp18, Gnai2, Pebp1, Fech, Rnf4, Rap2c, Leprel1, Edn1, Mlkl, Tlr2, St3gal5, Prlr, Nedd8, Smurf1, Ppp2r5a, Fkbp7, Fkbp2, Fbxl5, Acvr2a, Tnik, Dusp6, Kdr, Thbs1, Gm7168, Polr2g, Sumo3, Polr2h, Dpag…
GO:0031349	positive regulation of de	0.01063 ( 24 of 2257 genes )	0.00435 ( 148 of 34011 annotated genes )	4.848e-06	0.01542	Clec7a, Tlr2, Cd47, Fcgr3, Mapkapk2, Gimap5, Xcl1, Ccr7, Adam8, Tmem173, Pycard, Mif, Tnip3, Cd86, Cnr1, Pvr, Trim30a, Tgm2, Ripk2, Il1b, Ccl24, Tnf, Ager, Prkca,
GO:0045732	positive regulation of pr	0.00709 ( 16 of 2257 genes )	0.00221 ( 75 of 34011 annotated genes )	5.192e-06	0.01651	Rnf180, Dab2, Tnfrsf1b, Sh3d19, Apoe, Psen1, Adam8, Gja1, Snx1, Ier3, Trim30a, Il1b, Tnf, Vip, Adam9, Psmd10,
GO:0048870	cell motility	0.03500 ( 79 of 2257 genes )	0.02385 ( 811 of 34011 annotated genes )	5.411e-06	0.01721	Nck1, Psen1, Ccr7, Xcl1, Cd44, Hsp90aa1, Cyr61, Tns3, Ccl7, Atp5b, Lamb1, Dock4, Tnf, Pou3f2, Tspo, Adam9, Tnfaip1, Fcgr3, Cd47, Apoe, Ccr1, Fam40b, Rhoa, Loxl2, Adam8, P2ry2, Cx3cr1, Emx2, Pld2, Pvr, Diap1, Cd34, Cxcl1, Dpysl3, Rap2c, Cx3cl1, Slc9a10, Ccl12, Zfp640, Ppap2b, Prkca, Edn1, Tlr2, Ccl4, Csf3r, Lamc1, Lyst, C5ar1, Vcan, Thbs1, Kdr, Srgap2, Myo1f, Ndel1, Hif1a, Ccl24, Csnk2b, Calca, Am…
GO:0051674	localization of cell	0.03500 ( 79 of 2257 genes )	0.02385 ( 811 of 34011 annotated genes )	5.411e-06	0.01721	Nck1, Psen1, Ccr7, Xcl1, Cd44, Hsp90aa1, Cyr61, Tns3, Ccl7, Atp5b, Lamb1, Dock4, Tnf, Pou3f2, Tspo, Adam9, Tnfaip1, Fcgr3, Cd47, Apoe, Ccr1, Fam40b, Rhoa, Loxl2, Adam8, P2ry2, Cx3cr1, Emx2, Pld2, Pvr, Diap1, Cd34, Cxcl1, Dpysl3, Rap2c, Cx3cl1, Slc9a10, Ccl12, Zfp640, Ppap2b, Prkca, Edn1, Tlr2, Ccl4, Csf3r, Lamc1, Lyst, C5ar1, Vcan, Thbs1, Kdr, Srgap2, Myo1f, Ndel1, Hif1a, Ccl24, Csnk2b, Calca, Am…
GO:0034641	cellular nitrogen compoun	0.14931 ( 337 of 2257 genes )	0.13631 ( 4636 of 34011 annotated genes )	5.423e-06	0.01725	Nfe2l2, Mapkapk2, 4930447C04Rik, Sbno2, Atic, Ddx56, Asz1, Lhb, Atp6v0c, Hsp90aa1, Rest, Tada2a, Ak2, Gspt1, Jmjd6, Prpf4, Ikbkap, Tspo, Zfp516, Mthfd1l, Lhx5, Prpf6, Papd7, Npas3, Dab2ip, 0610031J06Rik, Foxn3, Mras, Tap1, Nlrc5, Abca1, Tbcc, Pycard, Tceb1, Il1a, Rbpj, Chaf1b, 2700060E02Rik, Pkm2, Nr1i2, Gnai2, Dpysl3, Snx6, Oas1a, Rnf4, Hivep1, Tlr2, Rhot1, Bnip3, Srsf3, Mtpn, Tsen2, Gemin7, Txn…
GO:0032879	regulation of localizatio	0.05228 ( 118 of 2257 genes )	0.03960 ( 1347 of 34011 annotated genes )	5.875e-06	0.01868	Clec7a, Hk2, Scn1b, Ptpn1, Ywhah, Gpr89, Rangap1, Ccr7, Xcl1, Hsp90aa1, Cyr61, Osm, Ccl7, Rest, Ehd1, Cybb, Niacr1, Cd38, Lamb1, Clec4n, Ppt1, Tnf, Plcb4, Kcne3, Rab3c, Tspo, Adam9, Dpysl2, Psmd10, Sgip1, Ptpn11, Dab2ip, Clec4e, Fcgr3, Cd47, Apoe, Hmgcr, Ccr1, Abca1, Kcnb1, Rhoa, Adam8, P2ry2, Cx3cr1, Tmem173, Bcl2l1, Pycard, Rfx6, Pld2, Diap1, Il1a, Trdn, Rab8a, Litaf, Nphs1, Snap23, Vip, Pea15a…
GO:0044265	cellular macromolecule ca	0.02215 ( 50 of 2257 genes )	0.01305 ( 444 of 34011 annotated genes )	6.577e-06	0.02091	Psmd14, Psmb10, Dnase1l3, Bnip3, Dab2, Psmb6, Psen1, Smurf1, Psma3, Fbxl5, Gzma, Sumo3, Gspt1, Psma5, Ppt1, Commd1, Ube2n, Lsm5, Psmb3, Psmd10, Psmc5, Dnajc3, Birc2, Pcnp, Socs6, Dcps, Dub1, Rnf180, Tnfaip1, Sec61b, Apoe, Anapc10, Tgfb1i1, Isg15, Smg7, Psma6, Tceb1, Usp25, Lin28b, Psmb2, Ldlr, Psmb4, Usp18, Apaf1, Psmb7, Ncbp2, Rnf4, Cycs, Usp36, Zfp36l2,
GO:0043067	regulation of programmed	0.04652 ( 105 of 2257 genes )	0.03437 ( 1169 of 34011 annotated genes )	6.649e-06	0.02114	Ndufs3, Higd1a, Nme5, Casp4, Psen1, Ywhah, Ccr7, Xcl1, Cd44, Tm2d1, Chst11, Cyr61, Ldha, Rest, Gpi1, Rassf6, Stk3, Niacr1, Parl, Cd38, Tex11, Serpinb9, Tsc22d3, C9, Ppt1, Ripk2, Tmx1, Tnf, Aldh1a1, Tspo, Psmd10, Nfkb1, Birc2, Nupr1, Dab2ip, Fcgr3, Tap1, Apoe, Hmgcr, Stat1, Rhoa, Adam8, Cx3cr1, Tnfsf10, Bcl2l1, Pycard, Pvr, 1110007C09Rik, Tmbim6, Vip, Pea15a, Api5, Cycs, Dnaja3, Cx3cl1, Plagl2, Pr…
GO:0051707	response to other organis	0.02437 ( 55 of 2257 genes )	0.01488 ( 506 of 34011 annotated genes )	6.707e-06	0.02133	Clec7a, Tlr2, Bnip3, Tnfrsf1b, Mapkapk2, Xcl1, Ccr7, Lyst, C5ar1, Cd86, Ddx1, Cnr1, Myo1f, Cxcl9, Casp1, Serpinb9, Clec4n, Mir217, Ripk2, Ifit1, Tnf, Bcr, Adam9, Tlr1, Gch1, Clec5a, Cd47, Defb3, Iigp1, Ccr1, Abca1, Stat1, Gbp6, Tmem173, Bcl2l1, Sp110, Pycard, Isg15, Mif, Tnip3, Fcgr2b, Prg2, Rbpj, Mir484, Defb2, Ier3, Litaf, Il1b, Ace2, Itgax, Oas1a, Ifit2, Cd14, Adm, Prkca,
GO:0042981	regulation of apoptosis	0.04608 ( 104 of 2257 genes )	0.03405 ( 1158 of 34011 annotated genes )	7.387e-06	0.02349	Ndufs3, Higd1a, Nme5, Casp4, Psen1, Ywhah, Ccr7, Xcl1, Cd44, Tm2d1, Chst11, Cyr61, Ldha, Rest, Gpi1, Rassf6, Stk3, Niacr1, Parl, Cd38, Tex11, Serpinb9, Tsc22d3, C9, Ppt1, Ripk2, Tmx1, Tnf, Aldh1a1, Tspo, Psmd10, Nfkb1, Birc2, Nupr1, Dab2ip, Fcgr3, Tap1, Apoe, Hmgcr, Stat1, Rhoa, Adam8, Cx3cr1, Tnfsf10, Bcl2l1, Pycard, Pvr, 1110007C09Rik, Tmbim6, Vip, Pea15a, Api5, Cycs, Dnaja3, Cx3cl1, Plagl2, Pr…
GO:0050790	regulation of catalytic a	0.05494 ( 124 of 2257 genes )	0.04231 ( 1439 of 34011 annotated genes )	7.499e-06	0.02385	Farp1, Tbc1d8, Psen1, Plaa, Tmem225, Ccr7, Arhgap6, Cd44, Rrp1b, Cyr61, Rest, Gpi1, Stk3, Cst7, Dusp19, Stfa3, Ttn, Serpinb9, Cnn3, C9, Gnai3, Chi3l1, Ppt1, Dgkh, Dock4, Tnf, Mapksp1, Agk, Adam9, Psmd10, Nfkb1, Dnajc3, Gch1, Ptpn11, Lmf1, Dab2ip, Ecsit, Serpinb8, Apoe, Serpinh1, Hmgcr, Nlrc5, Rhoa, Prol1, Plek, Adam8, Tnfsf10, Bcl2l1, Pycard, Tbc1d5, Itih3, Psme1, Wfdc6b, Cish, Gnai2, Vip, Pebp1,…
GO:0051272	positive regulation of ce	0.01418 ( 32 of 2257 genes )	0.00694 ( 236 of 34011 annotated genes )	7.524e-06	0.02393	Csf1, Pdgfa, Tlr2, Cmklr1, Ccr1, Xcl1, Ccr7, Adam8, P2ry2, Cyr61, Ccl7, Plau, Mif, Pld2, Thbs1, Kdr, Diap1, Myo1f, Lamb1, Hif1a, Ccl24, Ager, Amotl1, Icam1, Kit, Adam9, Cx3cl1, Zfp640, Ppap2b, Prkca, Map2k1, Edn1,
GO:0006886	intracellular protein tra	0.02437 ( 55 of 2257 genes )	0.01494 ( 508 of 34011 annotated genes )	7.527e-06	0.02394	Snupn, Prl, Egr2, Tlr2, Ap3s1, Timm23, Ipo7, Xpo5, Tnpo3, Smurf1, Ywhah, Ipo13, Rangap1, Txnip, Ap1g1, Timm8a1, Hsp90aa1, Sar1b, Ehd1, Pdcd6, Txn1, Agxt, Ifit1, Mrpl45, Tnf, Kpna6, Exoc4, Psmd10, Pip5k1a, Ptpn11, Dab2ip, Ap3b1, Ywhab, Sec61b, Tap1, Tmem30a, Fzd1, Stx6, l7Rn6, Tmem173, Timm17a, Kpnb1, Srpr, Tmed10, Snx1, Xpo6, Kpna3, Stat3, Litaf, Il1b, Sec23b, Blzf1, Snx6, Xpo7, Kpna2,
GO:0044271	cellular nitrogen compoun	0.02393 ( 54 of 2257 genes )	0.01458 ( 496 of 34011 annotated genes )	7.731e-06	0.02458	Ctps, Spnb1, Tlr2, Pcbd2, Nme5, Nppa, Bbox1, Atic, Nme4, Hsp90aa1, Atp5b, Mthfd1, Ak2, Gphn, Guk1, Agxt, Mocos, Kynu, Aldoa, Atp5o, Gnai3, Atp5f1, Tnf, Calca, Qtrtd1, Tspo, Gmps, Mthfd1l, Gch1, Pnp, Nampt, Apoe, Abca1, Aldh18a1, Gimap5, Tmem14c, Crh, Hdc, Qdpr, Cd34, Lgsn, Pkm2, Prpsap1, Il1b, Gnai2, Rrm1, Odc1, Vip, Fech, Oas1a, Mocs2, Icam1, Adm, Edn1,
GO:0001775	cell activation	0.02747 ( 62 of 2257 genes )	0.01755 ( 597 of 34011 annotated genes )	7.761e-06	0.02468	Clec7a, Psmb10, Tlr2, Nck1, Slc7a11, Vwf, Pdcd1lg2, Rnf8, Psen1, Sbno2, Ccr7, Lyst, Hsp90aa1, Cd86, Thbs1, Cnr1, Ddost, Myo1f, Casp1, Cd38, Lgals1, Ripk2, Tnf, Jmjd6, Ppp3cb, Bcr, Adam9, Il2rg, Tlr1, Gapt, Socs6, Pdgfa, Pnp, Ap3b1, Fcgr3, Cd47, Apoe, Fkbp1a, Gimap5, Plek, Myh9, Adam8, Pfdn1, Entpd1, Cx3cr1, Pld2, Mif, Cd59b, Fcgr2b, Rbpj, P2rx1, Il2rb, Cd209a, Fgg, Il1b, Ndrg1, Icam1, Dnaja3, Kit…
GO:0018130	heterocycle biosynthetic	0.01772 ( 40 of 2257 genes )	0.00970 ( 330 of 34011 annotated genes )	9.64e-06	0.03065	Ctps, Spnb1, Pcbd2, Nme5, Nppa, Atic, Nme4, Atp5b, Mthfd1, Ak2, Gphn, Guk1, Mocos, Kynu, Aldoa, Atp5o, Gnai3, Atp5f1, Calca, Qtrtd1, Gmps, Mthfd1l, Gch1, Pnp, Nampt, Apoe, Abca1, Aldh18a1, Tmem14c, Crh, Hdc, Qdpr, Pkm2, Gnai2, Vip, Fech, Oas1a, Mocs2, Adm, Edn1,
GO:0040017	positive regulation of lo	0.01418 ( 32 of 2257 genes )	0.00703 ( 239 of 34011 annotated genes )	9.795e-06	0.03115	Csf1, Pdgfa, Tlr2, Cmklr1, Ccr1, Xcl1, Ccr7, Adam8, P2ry2, Cyr61, Ccl7, Plau, Mif, Pld2, Thbs1, Kdr, Diap1, Myo1f, Lamb1, Hif1a, Ccl24, Ager, Amotl1, Icam1, Kit, Adam9, Cx3cl1, Zfp640, Ppap2b, Prkca, Map2k1, Edn1,
GO:0051186	cofactor metabolic proces	0.01418 ( 32 of 2257 genes )	0.00703 ( 239 of 34011 annotated genes )	9.795e-06	0.03115	Spnb1, Mthfd1l, Blvrb, Hibadh, Acly, Mdh2, Suclg1, Gch1, Pnp, Pcbd2, Acot10, Nampt, Adh4, Hmgcr, Atic, Tmem14c, Ldha, Mthfd1, Qdpr, Gphn, Mocos, Tdo2, Coq5, Kynu, Aldh1l2, Ppt1, Folh1, Fech, Acot2, Mocs2, Pgam1, Cs,
GO:0071310	cellular response to orga	0.03323 ( 75 of 2257 genes )	0.02273 ( 773 of 34011 annotated genes )	1.064e-05	0.03384	Mir148a, Nfe2l2, Kdm3a, Mirlet7f-2, Ptpn1, Tnfrsf1b, Sva, Mir297-1, Xcl1, Ccr7, Cd44, Ccl7, Rest, Ripk2, Ppp2r5d, Tnf, Pou3f2, Mapksp1, Dnajc3, Ptpn11, Nr5a2, Dab2ip, Mir101b, Hmgcr, Ccr1, Nlrc5, Csf2rb2, Stat1, Smad1, Gbp6, Cx3cr1, Tmem173, Bcl2l1, Pycard, Rps6ka4, Diap1, Il1a, Nr1i2, Gm4951, Mir216b, Mir669c, Ifit2, Dnaja3, Cx3cl1, Prkca, Cxcr7, Egr2, Prlr, Srsf3, Casp1, Nr1d2, Mir217, Ifit1, C…
GO:0019320	hexose catabolic process	0.00665 ( 15 of 2257 genes )	0.00209 ( 71 of 34011 annotated genes )	1.151e-05	0.0366	Gpi1, Hibadh, Hk2, Aldoa, Pkm2, Hif1a, Ier3, Glb1, Pgk1, Bpgm, Pgam1, Aldoc, Pgm2, Ldha, Mif,
GO:0055086	nucleobase, nucleoside an	0.03633 ( 82 of 2257 genes )	0.02555 ( 869 of 34011 annotated genes )	1.178e-05	0.03748	Tuba8, Nme5, Tbc1d8, Atic, Nme4, Lhb, Ccr7, Arhgap6, Atp6v0c, Hddc3, Hsp90aa1, Ldha, Atp5b, Ak2, Cnn3, Gnai3, Dock4, Atp5f1, Dpysl2, Ak4, Hibadh, Mdh2, Gch1, Dab2ip, Nampt, Mras, Tap1, Apoe, Abca1, Rhoa, Tbcc, Tbc1d5, Rnf213, Pkm2, Gnai2, Vip, Dpysl3, Oas1a, Rap2c, Pgam1, Edn1, Ctps, Macrod2, Rhot1, Nppa, Nudt9, Gnb4, Mthfd1, Tbc1d2b, Srgap2, Guk1, Ndel1, Aldoa, Kynu, Atp5o, Ccl24, Calca, Atp1b3,…
GO:0009896	positive regulation of ca	0.00930 ( 21 of 2257 genes )	0.00370 ( 126 of 34011 annotated genes )	1.205e-05	0.03832	Rnf180, Dab2, Tnfrsf1b, Sh3d19, Apoe, Psen1, Acsl5, Adam8, Pafah1b2, Mif, Gja1, Snx1, Ier3, Trim30a, Il1b, Tnf, Scoc, Vip, Larp1, Adam9, Psmd10,
GO:0044249	cellular biosynthetic pro	0.13425 ( 303 of 2257 genes )	0.12202 ( 4150 of 34011 annotated genes )	1.267e-05	0.04029	Nfe2l2, 4930447C04Rik, Sbno2, Atic, Denr, Hsp90aa1, Eif4e, Rest, Tada2a, Gpi1, Ak2, Cybb, Gspt1, Aldh1a1, Jmjd6, Ikbkap, Eif3k, Tspo, Zfp516, Mthfd1l, Lhx5, Prpf6, Papd7, Npas3, Dab2ip, 0610031J06Rik, Foxn3, Hmgcr, Nlrc5, Abca1, Mboat1, Pycard, Tceb1, Rpn1, Il1a, Rbpj, Chaf1b, Rplp1, 2700060E02Rik, Pkm2, Nr1i2, Gnai2, Sgms2, Snx6, Oas1a, Rnf4, Mrpl23, Pla2g16, Hivep1, Acly, Tlr2, Degs1, Mrpl39, T…
GO:0051704	multi-organism process	0.03101 ( 70 of 2257 genes )	0.02099 ( 714 of 34011 annotated genes )	1.473e-05	0.04683	Clec7a, Tnfrsf1b, Mapkapk2, Xcl1, Ccr7, Rest, Serpinb9, Lamb1, Clec4n, Ripk2, Tnf, Adam9, Hpgd, Gch1, Npas3, Cd47, Defb3, Tap1, Ccr1, Abca1, Stat1, Gbp6, P2ry2, Tmem173, Bcl2l1, Pycard, Tnip3, Prg2, Rbpj, Mir484, Defb2, Litaf, Abcg2, Itgax, Oas1a, Ifit2, Prkca, Tlr2, Bnip3, Psg22, Ccl4, Lyst, Acvr2a, C5ar1, Ddx1, Cd86, Cnr1, Cxcl9, Myo1f, Casp1, Mir217, Ifit1, Calca, Bcr, Tlr1, Clec5a, Iigp1, Crh…
GO:0010941	regulation of cell death	0.04696 ( 106 of 2257 genes )	0.03546 ( 1206 of 34011 annotated genes )	1.515e-05	0.04818	Ndufs3, Higd1a, Nme5, Casp4, Psen1, Ywhah, Ccr7, Xcl1, Cd44, Tm2d1, Chst11, Cyr61, Ldha, Rest, Gpi1, Rassf6, Stk3, Niacr1, Parl, Cd38, Tex11, Serpinb9, Tsc22d3, C9, Ppt1, Ripk2, Tmx1, Tnf, Aldh1a1, Tspo, Psmd10, Nfkb1, Birc2, Nupr1, Dab2ip, Fcgr3, Tap1, Apoe, Hmgcr, Stat1, Rhoa, Adam8, Cx3cr1, Tnfsf10, Bcl2l1, Pycard, Pvr, 1110007C09Rik, Cd34, Tmbim6, Vip, Pea15a, Api5, Cycs, Dnaja3, Cx3cl1, Plag…
GO:0006928	cellular component moveme	0.03545 ( 80 of 2257 genes )	0.02496 ( 849 of 34011 annotated genes )	1.576e-05	0.05012	Nck1, Psen1, Ccr7, Xcl1, Cd44, Hsp90aa1, Cyr61, Tns3, Ccl7, Atp5b, Lamb1, Dock4, Tnf, Pou3f2, Tspo, Adam9, Tnfaip1, Fcgr3, Cd47, Apoe, Ccr1, Fam40b, Rhoa, Loxl2, Adam8, P2ry2, Cx3cr1, Emx2, Pafah1b2, Pld2, Pvr, Diap1, Cd34, Cxcl1, Dpysl3, Rap2c, Cx3cl1, Slc9a10, Ccl12, Zfp640, Ppap2b, Prkca, Edn1, Tlr2, Ccl4, Csf3r, Lamc1, Lyst, C5ar1, Vcan, Thbs1, Kdr, Srgap2, Myo1f, Ndel1, Hif1a, Ccl24, Csnk2b,…
GO:0051043	regulation of membrane pr	0.00310 ( 7 of 2257 genes )	0.00047 ( 16 of 34011 annotated genes )	1.593e-05	0.05065	Il1b, Tnf, Tnfrsf1b, Sh3d19, Adam8, Adam9, Apoe,
GO:0006066	alcohol metabolic process	0.02304 ( 52 of 2257 genes )	0.01426 ( 485 of 34011 annotated genes )	1.721e-05	0.05474	Hk2, Sult1d1, Cyp51, Pygl, Csgalnact1, Adh4, Hdlbp, Glb1, Ldha, Lss, Ebp, Moxd1, Gpi1, Cyp27a1, Guk1, Dpagt1, Aldoa, Hif1a, Man2c1, Tnf, Fdft1, Bpgm, Pgm2, G6pd2, Hibadh, Insig2, Ppap2a, Gch1, Ch25h, Lmf1, Galk2, Apoe, Hmgcr, Dusp12, Abca1, Ly6e, Sc4mol, Mif, Pdk1, Hdc, Pfkfb3, Pgcp, Ldlr, Pkm2, Ier3, Ip6k1, Pebp1, Pgk1, Fech, Hsd17b7, Pgam1, Aldoc,
GO:0071216	cellular response to biot	0.01108 ( 25 of 2257 genes )	0.00500 ( 170 of 34011 annotated genes )	1.801e-05	0.05726	Clec7a, Nfe2l2, Tlr2, Ptpn1, Tnfrsf1b, Abca1, Stat1, Gbp6, Txnip, Mif, Tnip3, Ppp1r15b, Fcgr2b, Mir484, Litaf, Mir217, Ripk2, Il1b, Tnf, Ero1l, Adam9, Cd14, Tlr1, Dnajc3, Prkca,
GO:0071841	cellular component organi	0.09703 ( 219 of 2257 genes )	0.08456 ( 2876 of 34011 annotated genes )	1.899e-05	0.06038	Bub1b, Scn1b, Dnase1l3, Tuba8, Vps54, Prdx6, Ywhah, Ddx56, Atg13, Ccr7, Arhgap6, Atp6v0c, Hsp90aa1, Ccl7, Rest, Tada2a, Parl, Ttn, Cnn3, Lamb1, Lgals1, Gsn, Zmym4, Jmjd6, Nsfl1c, Ptpn11, Prpf6, Papd7, Grin3a, Tln1, Abca1, Fam40b, Plek, Pfn4, P2ry2, Kif3b, Rps6ka4, Trove2, Epb4.1, Il1a, Gypa, Chaf1b, Nop10, Tmed10, Myo3a, Rab8a, Pstpip2, Nphs1, Cenpj, Pebp1, Dpysl3, Mapre2, Rnf4, Cycs, Gm14160, Cl…
GO:0046365	monosaccharide catabolic	0.00665 ( 15 of 2257 genes )	0.00218 ( 74 of 34011 annotated genes )	1.947e-05	0.06191	Gpi1, Hibadh, Hk2, Aldoa, Pkm2, Hif1a, Ier3, Glb1, Pgk1, Bpgm, Pgam1, Aldoc, Pgm2, Ldha, Mif,
GO:0043122	regulation of I-kappaB ki	0.00930 ( 21 of 2257 genes )	0.00382 ( 130 of 34011 annotated genes )	1.969e-05	0.06261	Dab2ip, Pdcd11, Fkbp1a, Stat1, Rhoa, Tnip3, Il1a, Gja1, Eef1d, S100a13, Lgals1, Clec4n, Litaf, Tgm2, Ripk2, Il1b, Zdhhc17, Trim38, Tnf, Ube2n, Dnaja3,
GO:0043280	positive regulation of ca	0.00753 ( 17 of 2257 genes )	0.00271 ( 92 of 34011 annotated genes )	2.014e-05	0.06404	Rnf7, Rhoa, Fam162a, Tnfsf10, Cyr61, Pycard, Rest, Pdcd6, Senp1, P2rx1, C9, Xdh, Apaf1, Tnf, Robo1, Cycs, Dnaja3,
GO:0050715	positive regulation of cy	0.00532 ( 12 of 2257 genes )	0.00147 ( 50 of 34011 annotated genes )	2.209e-05	0.07025	Il1a, Tlr2, Clec5a, Casp1, Clec4e, Psg22, Clec4n, Tnf, Ccr7, Cd14, Pycard, Mif,
GO:0051049	regulation of transport	0.04032 ( 91 of 2257 genes )	0.02964 ( 1008 of 34011 annotated genes )	2.231e-05	0.07094	Clec7a, Hk2, Scn1b, Ptpn1, Ywhah, Gpr89, Rangap1, Xcl1, Ccr7, Hsp90aa1, Osm, Rest, Cybb, Niacr1, Cd38, Clec4n, Ppt1, Tnf, Plcb4, Kcne3, Rab3c, Tspo, Adam9, Dpysl2, Psmd10, Sgip1, Ptpn11, Dab2ip, Clec4e, Fcgr3, Cd47, Apoe, Hmgcr, Ccr1, Kcnb1, Abca1, P2ry2, Tmem173, Pycard, Rfx6, Pld2, Diap1, Il1a, Trdn, Rab8a, Litaf, Nphs1, Snap23, Vip, Pea15a, Cxcl1, Vdac3, Cx3cl1, Prkca, Edn1, Tlr2, Psg22, Ccl4,…
GO:0009259	ribonucleotide metabolic	0.02437 ( 55 of 2257 genes )	0.01552 ( 528 of 34011 annotated genes )	2.267e-05	0.07209	Ctps, Rhot1, Tuba8, Nme5, Tbc1d8, Atic, Nme4, Nudt9, Ccr7, Arhgap6, Atp6v0c, Gnb4, Hsp90aa1, Atp5b, Tbc1d2b, Ak2, Guk1, Srgap2, Ndel1, Aldoa, Atp5o, Gnai3, Ccl24, Dock4, Atp5f1, Atp1b3, Rragc, Rfc3, Gmps, Ak4, Psmc5, Pip5k1a, Abcc5, Gch1, Pnp, Rhoj, Dab2ip, Mras, Tap1, Iigp1, Abcb1b, Rhoa, Tbcc, Myh9, Entpd1, Tbc1d5, Entpd7, Srpr, Rnf213, Pkp4, Pkm2, Gnai2, Tubb5, Rap2c, Map2k1,
GO:0043281	regulation of caspase act	0.01063 ( 24 of 2257 genes )	0.00476 ( 162 of 34011 annotated genes )	2.319e-05	0.07374	Rnf7, Rhoa, Cd44, Cflar, Tnfsf10, Fam162a, Cyr61, Bcl2l1, Pycard, Rest, Pdcd6, Senp1, Gpi1, Thbs1, P2rx1, Serpinb9, Csnk2a1, C9, Xdh, Apaf1, Tnf, Robo1, Cycs, Dnaja3,
GO:0030155	regulation of cell adhesi	0.01418 ( 32 of 2257 genes )	0.00735 ( 250 of 34011 annotated genes )	2.456e-05	0.07809	Prlr, Arhgap6, Cd44, Cyr61, Atp5b, Thbs1, Kdr, Myo1f, Lamb1, Lgals1, Gsn, Tnf, Calca, Rnd1, Dact2, Adam9, Csf1, Ptpn11, Jam2, Cd47, Nid1, Adam8, Pld2, Plau, Rbpj, Tgm2, Il1b, Icam1, Ppap2b, Cx3cl1, Prkca, Map2k1,
GO:0044257	cellular protein cataboli	0.01728 ( 39 of 2257 genes )	0.00976 ( 332 of 34011 annotated genes )	2.541e-05	0.0808	Psmd14, Psmb10, Bnip3, Dab2, Psmb6, Psen1, Smurf1, Psma3, Fbxl5, Gzma, Sumo3, Psma5, Ppt1, Commd1, Ube2n, Psmb3, Psmd10, Dnajc3, Psmc5, Birc2, Pcnp, Socs6, Dub1, Rnf180, Tnfaip1, Sec61b, Apoe, Anapc10, Isg15, Tgfb1i1, Psma6, Tceb1, Usp25, Psmb2, Psmb4, Usp18, Psmb7, Rnf4, Usp36,
GO:0019222	regulation of metabolic p	0.14400 ( 325 of 2257 genes )	0.13337 ( 4536 of 34011 annotated genes )	2.689e-05	0.08552	Nfe2l2, Farp1, Mapkapk2, 4930447C04Rik, Sbno2, Asz1, Mir133b, Lhb, Hsp90aa1, Eif4e, Rest, Tada2a, Gpi1, Cst7, Ttn, Dgkh, Jmjd6, Ikbkap, Eif3k, Tspo, Zfp516, Nupr1, Ptpn11, Lhx5, Prpf6, Npas3, Dab2ip, 0610031J06Rik, Foxn3, Serpinb8, Hmgcr, Nlrc5, Abca1, Prol1, Pycard, Tceb1, Il1a, Rbpj, Chaf1b, Itih3, 2700060E02Rik, Wfdc6b, Nr1i2, Gnai2, Snx6, Rnf4, Mir34c, Hivep1, Tlr2, Bnip3, Smurf1, Acvr2a, Tni…
GO:0051336	regulation of hydrolase a	0.03101 ( 70 of 2257 genes )	0.02143 ( 729 of 34011 annotated genes )	2.885e-05	0.09174	Farp1, Tbc1d8, Tmem225, Ccr7, Arhgap6, Cd44, Rrp1b, Cyr61, Rest, Gpi1, Cst7, Stfa3, Serpinb9, Cnn3, C9, Ppt1, Dock4, Tnf, Lmf1, Dab2ip, Serpinb8, Serpinh1, Rhoa, Prol1, Plek, Tnfsf10, Bcl2l1, Pycard, Tbc1d5, Itih3, Psme1, Wfdc6b, Pebp1, Cycs, Dnaja3, Edn1, Psmd14, Psme2, Fn1, Cflar, Gzma, Senp1, Pdcd6, Thbs1, Tbc1d2b, Srgap2, Ndel1, Cstb, Ifit1, Ccl24, Calca, Serpinb2, Rnf7, Pip5k1a, Gpr139, Mki6…
GO:0040011	locomotion	0.03899 ( 88 of 2257 genes )	0.02864 ( 974 of 34011 annotated genes )	2.942e-05	0.09357	Scn1b, Nck1, Psen1, Ccr7, Xcl1, Cd44, Hsp90aa1, Cyr61, Tns3, Ccl7, Cysltr1, Atp5b, Ccl17, Ttn, Lamb1, Dock4, Tnf, Pou3f2, Tspo, Adam9, Tnfaip1, Fcgr3, Cd47, Apoe, Ccr1, Fam40b, Rhoa, Loxl2, Adam8, P2ry2, Cx3cr1, Emx2, Pld2, Pvr, Diap1, Cd34, Cxcl1, Dpysl3, Rap2c, Cx3cl1, Slc9a10, Ccl12, Zfp640, Ppap2b, Prkca, Edn1, Egr2, Klf7, Tlr2, Ccl4, Csf3r, Lamc1, Lyst, C5ar1, Vcan, Thbs1, Kdr, Cmtm3, Srgap2…
GO:0009199	ribonucleoside triphospha	0.02304 ( 52 of 2257 genes )	0.01455 ( 495 of 34011 annotated genes )	2.987e-05	0.09499	Ctps, Rhot1, Tuba8, Nme5, Tbc1d8, Nme4, Ccr7, Arhgap6, Atp6v0c, Gnb4, Hsp90aa1, Atp5b, Tbc1d2b, Ak2, Guk1, Srgap2, Ndel1, Aldoa, Atp5o, Gnai3, Ccl24, Dock4, Atp5f1, Atp1b3, Rragc, Rfc3, Ak4, Psmc5, Pip5k1a, Abcc5, Gch1, Pnp, Dab2ip, Rhoj, Mras, Tap1, Iigp1, Abcb1b, Rhoa, Tbcc, Myh9, Entpd1, Tbc1d5, Entpd7, Srpr, Rnf213, Pkp4, Pkm2, Gnai2, Tubb5, Rap2c, Map2k1,
GO:0001816	cytokine production	0.01905 ( 43 of 2257 genes )	0.01126 ( 383 of 34011 annotated genes )	3.027e-05	0.09626	Clec7a, Tlr2, Psg22, Mapkapk2, Ccl4, Xcl1, Ccr7, Thbs1, Darc, Casp1, S100a13, Hif1a, Clec4n, Chi3l1, Ripk2, Tnf, Calca, Mefv, Tspo, Tlr1, Nfkb1, Pnp, Clec5a, Fcgr3, Clec4e, Cmklr1, Abca1, Gimap5, Adam8, P2ry2, Tmem173, Pycard, Mif, Fcgr2b, Il1a, Rbpj, Cd34, Trim30a, Litaf, Il1b, Kit, Cx3cl1, Cd14,
GO:0022900	electron transport chain	0.00842 ( 19 of 2257 genes )	0.00335 ( 114 of 34011 annotated genes )	3.08e-05	0.09793	CYTB, Ndufs3, Ndufa5, Ndufb5, Ndufb7, Cyc1, Txnl1, Ndufb6, Txn1, Ndufb9, Cybb, Ndufa4, Tmx1, Ndufs4, Ndufb3, Ndufs6, Ero1l, Cycs, Glrx2,
GO:0002526	acute inflammatory respon	0.00753 ( 17 of 2257 genes )	0.00279 ( 95 of 34011 annotated genes )	3.105e-05	0.09875	Reg3g, Nupr1, Fcgr3, Saa3, Ccr1, Ccr7, Adam8, Mif, Cd59b, Fcgr2b, Cnr1, Il1a, Serpinb9, Stat3, Il1b, Tnf, Cxcl1,
GO:0050817	coagulation	0.00886 ( 20 of 2257 genes )	0.00365 ( 124 of 34011 annotated genes )	3.146e-05	0.1	Nfe2l2, Pdgfa, Slc7a11, Ap3b1, Vwf, Apoe, Psen1, F13a1, Fga, Plek, Lyst, Entpd1, Thbs1, Cd34, P2rx1, Fgg, C9, F5, Cx3cl1, Prkca,
GO:0006753	nucleoside phosphate meta	0.03412 ( 77 of 2257 genes )	0.02429 ( 826 of 34011 annotated genes )	3.248e-05	0.1033	Tuba8, Nme5, Tbc1d8, Atic, Nme4, Lhb, Ccr7, Arhgap6, Atp6v0c, Hddc3, Hsp90aa1, Ldha, Atp5b, Ak2, Cnn3, Gnai3, Dock4, Atp5f1, Ak4, Hibadh, Mdh2, Gch1, Dab2ip, Nampt, Mras, Tap1, Apoe, Abca1, Rhoa, Tbcc, Tbc1d5, Rnf213, Pkm2, Gnai2, Vip, Oas1a, Rap2c, Pgam1, Edn1, Ctps, Rhot1, Nppa, Nudt9, Gnb4, Mthfd1, Tbc1d2b, Srgap2, Guk1, Ndel1, Aldoa, Kynu, Atp5o, Ccl24, Calca, Atp1b3, Rragc, Rfc3, Psmc5, Gmps…
GO:0009117	nucleotide metabolic proc	0.03412 ( 77 of 2257 genes )	0.02429 ( 826 of 34011 annotated genes )	3.248e-05	0.1033	Tuba8, Nme5, Tbc1d8, Atic, Nme4, Lhb, Ccr7, Arhgap6, Atp6v0c, Hddc3, Hsp90aa1, Ldha, Atp5b, Ak2, Cnn3, Gnai3, Dock4, Atp5f1, Ak4, Hibadh, Mdh2, Gch1, Dab2ip, Nampt, Mras, Tap1, Apoe, Abca1, Rhoa, Tbcc, Tbc1d5, Rnf213, Pkm2, Gnai2, Vip, Oas1a, Rap2c, Pgam1, Edn1, Ctps, Rhot1, Nppa, Nudt9, Gnb4, Mthfd1, Tbc1d2b, Srgap2, Guk1, Ndel1, Aldoa, Kynu, Atp5o, Ccl24, Calca, Atp1b3, Rragc, Rfc3, Psmc5, Gmps…
GO:0065008	regulation of biological	0.07842 ( 177 of 2257 genes )	0.06668 ( 2268 of 34011 annotated genes )	3.428e-05	0.109	Nfe2l2, Scn1b, Vps54, Ckb, Adh4, Ywhah, Xcl1, Atp6v0c, Csrp3, Hsp90aa1, Txnl1, Ccl7, Rest, Cysltr1, Txndc9, Slc6a12, Gsn, Aldh1a1, Jmjd6, Tspo, Uts2d, Nupr1, Gch1, Ptpn11, Nr5a2, Dab2ip, Tln1, Tap1, Hmgcr, Abca1, Fam40b, Plek, Adam8, P2ry2, Epb4.1, Retsat, Il1a, Gypa, Nucb2, Rab8a, Nphs1, Pebp1, Fech, Cx3cl1, Naalad2, Edn1, Rhot1, Tlr2, Bnip3, Prlr, Ccl4, Fbxl5, Lyst, Acvr2a, Mtpn, Txn1, Thbs1, K…
GO:0050727	regulation of inflammator	0.01063 ( 24 of 2257 genes )	0.00488 ( 166 of 34011 annotated genes )	3.484e-05	0.1108	Tnfrsf1b, Cd47, Fcgr3, Apoe, Sbno2, Ccr1, Xcl1, Ccr7, Adam8, Mif, Cd59b, Cnr1, Fcgr2b, Psmb4, Tgm2, Ier3, Ccl24, Il1b, Tnf, Calca, Ager, Bcr, Mefv, Prkca,
GO:0019438	aromatic compound biosynt	0.00399 ( 9 of 2257 genes )	0.00088 ( 30 of 34011 annotated genes )	3.487e-05	0.1109	Mthfd1, Mthfd1l, Qdpr, Gch1, Gphn, Pcbd2, Mocos, Atic, Mocs2,
GO:0006732	coenzyme metabolic proces	0.01152 ( 26 of 2257 genes )	0.00553 ( 188 of 34011 annotated genes )	3.675e-05	0.1169	Mthfd1l, Hibadh, Acly, Mdh2, Suclg1, Gch1, Pnp, Pcbd2, Acot10, Nampt, Hmgcr, Atic, Ldha, Mthfd1, Qdpr, Gphn, Mocos, Tdo2, Coq5, Kynu, Aldh1l2, Folh1, Acot2, Mocs2, Pgam1, Cs,
GO:0046903	secretion	0.02836 ( 64 of 2257 genes )	0.01929 ( 656 of 34011 annotated genes )	3.89e-05	0.1237	Dab2, Psen1, Ccr7, Osm, Rest, Niacr1, Agxt, Cd38, S100a13, Clec4n, Chi3l1, Ppt1, Tnf, Rab3c, Adam9, Dpysl2, Ptpn11, Lmf1, Fcgr3, Clec4e, Hmgcr, Ccr1, Abca1, Plek, P2ry2, Rfx6, Pycard, Pld2, Il1a, Exoc6b, Rbpj, Rab8a, Nphs1, Snap23, Cx3cl1, Prkca, Edn1, Tlr2, Psg22, Prlr, Lyst, Acvr2a, Cnr1, Myo1f, Ica1, Casp1, Hif1a, Unc13c, Ppp3cb, Bcr, Exoc4, Pnp, Scamp1, Clec5a, Ly6e, Crh, Mif, Csn3, P2rx1, Il…
GO:0006796	phosphate metabolic proce	0.06114 ( 138 of 2257 genes )	0.04987 ( 1696 of 34011 annotated genes )	3.945e-05	0.1255	Bub1b, Farp1, Ckb, Mapkapk2, Tmem225, Ccr7, Ak2, Ttn, Chi3l1, Dgkh, Mapk6, Ikbkap, Ppef1, Ppap2a, Ptpn11, Dab2ip, Galk2, Hmgcr, Nlrc5, Aldh18a1, Plek, Adam8, Rps6ka4, Pip5kl1, Myo3a, Pkm2, Cish, Gnai2, Sgms2, Pebp1, Fech, Rap2c, Cycs, Edn1, Mlkl, Tlr2, Prlr, Ppp2r5a, Acvr2a, Tnik, Dusp6, Thbs1, Kdr, Gm7168, Polr2g, Polr2h, Prkd3, Akap13, Ppp3cb, Prkab1, Tlr1, Cnksr2, Pip5k1a, Smad5, Ywhab, Fkbp1a…
GO:0042060	wound healing	0.01285 ( 29 of 2257 genes )	0.00653 ( 222 of 34011 annotated genes )	3.966e-05	0.1261	Nfe2l2, Pdgfa, Slc7a11, Ap3b1, Vwf, Apoe, Hmgcr, F13a1, Fga, Plek, Fn1, Lyst, Cd44, Entpd1, Cyr61, Plau, Thbs1, Gja1, P2rx1, Cd34, Hif1a, Pkm2, Fgg, C9, F5, Serpinb2, Cx3cl1, Ppap2b, Prkca,
GO:0048519	negative regulation of bi	0.09703 ( 219 of 2257 genes )	0.08559 ( 2911 of 34011 annotated genes )	4.035e-05	0.1283	Mapkapk2, Sbno2, Ywhah, Asz1, Mir133b, Ccr7, Xcl1, Arhgap6, Chst11, Rest, Gpi1, Parl, Lamb1, Lgals1, Gsn, Dact2, Tspo, Nfkb1, Nupr1, Ptpn11, Grin3a, Dab2ip, Foxn3, Tap1, Hmgcr, Nlrc5, Stat1, Plek, Adam8, P2ry2, Tnip3, Il1a, Rbpj, Rgs6, Psmb4, Cish, Nr1i2, Gnai2, Pea15a, Pebp1, Dpysl3, Snx6, Oas1a, Rap2c, Leprel1, Mir34c, Cx3cl1, Pla2g16, Hivep1, Edn1, Cxcr7, Tlr2, Bnip3, Smurf1, Ppp2r5a, Ccl4, Du…
GO:0051246	regulation of protein met	0.04564 ( 103 of 2257 genes )	0.03508 ( 1193 of 34011 annotated genes )	4.074e-05	0.1296	Kdm3a, Nck1, Dab2, Tnfrsf1b, Igf2bp2, Psen1, Ccr7, Cd44, Cyr61, Eif4e, Osm, Stk3, Dusp19, Ttn, Serpinb9, Chi3l1, Ripk2, Dgkh, Ndufs4, Ppp2r5d, Tnf, Mapksp1, Agk, Eif3k, Adam9, Psmd10, Dnajc3, Nupr1, Ptpn11, Rnf180, Dab2ip, Serpinb8, Apoe, Serpinh1, Hmgcr, Adam8, Rps6ka4, Ppp1r15b, Pion, Cish, Trim30a, Gnai2, Aimp2, Vip, Pebp1, Fech, Rap2c, Dnaja3, Ppap2b, Prkca, Edn1, Psmd14, Eif2s1, Sh3d19, Prlr…
GO:0006793	phosphorus metabolic proc	0.06114 ( 138 of 2257 genes )	0.04993 ( 1698 of 34011 annotated genes )	4.168e-05	0.1326	Bub1b, Farp1, Ckb, Mapkapk2, Tmem225, Ccr7, Ak2, Ttn, Chi3l1, Dgkh, Mapk6, Ikbkap, Ppef1, Ppap2a, Ptpn11, Dab2ip, Galk2, Hmgcr, Nlrc5, Aldh18a1, Plek, Adam8, Rps6ka4, Pip5kl1, Myo3a, Pkm2, Cish, Gnai2, Sgms2, Pebp1, Fech, Rap2c, Cycs, Edn1, Mlkl, Tlr2, Prlr, Ppp2r5a, Acvr2a, Tnik, Dusp6, Thbs1, Kdr, Gm7168, Polr2g, Polr2h, Prkd3, Akap13, Ppp3cb, Prkab1, Tlr1, Cnksr2, Pip5k1a, Smad5, Ywhab, Fkbp1a…
GO:0050776	regulation of immune resp	0.01817 ( 41 of 2257 genes )	0.01070 ( 364 of 34011 annotated genes )	4.248e-05	0.1351	Clec7a, Tlr2, Mapkapk2, Psen1, 2010106G01Rik, Xcl1, Ccr7, Cd44, C5ar1, Cd86, Cnr1, Myo1f, Cd38, C9, Ripk2, Tnf, Ppp3cb, Bcr, Ube2n, Cfp, Pnp, Fcgr3, Tap1, Trafd1, Fkbp1a, Ccr1, Nlrc5, Gimap5, Adam8, Tmem173, Pycard, Pld2, Mif, Tnip3, Cd59b, Pvr, Fcgr2b, Psmb4, Trim30a, Dnaja3, Fcnb,
GO:0002684	positive regulation of im	0.02038 ( 46 of 2257 genes )	0.01253 ( 426 of 34011 annotated genes )	4.306e-05	0.1369	Clec7a, Tlr2, Nck1, Pdcd1lg2, Mapkapk2, Psen1, Xcl1, Ccr7, Cd44, Lyst, Hsp90aa1, C5ar1, Cd86, Thbs1, Cnr1, Cd38, Lgals1, C9, Ripk2, Tnf, Ube2n, Il2rg, Cfp, Pnp, Fcgr3, Cd47, Ap3b1, Tap1, Cmklr1, Ccr1, Gimap5, Adam8, Tmem173, Pycard, Pld2, Mif, Tnip3, Cd59b, Pvr, Trim30a, Il1b, Icam1, Fcnb, Dnaja3, Cx3cl1, Edn1,
GO:0046700	heterocycle catabolic pro	0.02437 ( 55 of 2257 genes )	0.01591 ( 541 of 34011 annotated genes )	4.428e-05	0.1408	Aadat, Rhot1, Tuba8, Tbc1d8, Nudt9, Ccr7, Arhgap6, Atp6v0c, Gnb4, Hsp90aa1, Atp5b, Mthfd1, Tbc1d2b, Srgap2, Ndel1, Kynu, Aldh1l2, Cnn3, Atp5o, Gnai3, Ccl24, Dock4, Atp5f1, Rragc, Rfc3, Dpysl2, Psmc5, Blvrb, Pip5k1a, Abcc5, Gch1, Pnp, Rhoj, Dab2ip, Mras, Tap1, Allc, Iigp1, Abcb1b, Rhoa, Tbcc, Myh9, Entpd1, Hdc, Tbc1d5, Srpr, Tdo2, Rnf213, Pkp4, Xdh, Gnai2, Tubb5, Dpysl3, Rap2c, Map2k1,
GO:0016052	carbohydrate catabolic pr	0.00886 ( 20 of 2257 genes )	0.00373 ( 127 of 34011 annotated genes )	4.473e-05	0.1423	Hibadh, Hk2, Agl, Pygl, Glb1, Cd44, Ldha, Mif, Gpi1, Gns, Aldoa, Hif1a, Pkm2, Chi3l1, Ier3, Bpgm, Pgk1, Pgam1, Pgm2, Aldoc,
GO:0009150	purine ribonucleotide met	0.02348 ( 53 of 2257 genes )	0.01517 ( 516 of 34011 annotated genes )	4.605e-05	0.1464	Rhot1, Tuba8, Nme5, Tbc1d8, Atic, Nme4, Nudt9, Ccr7, Arhgap6, Atp6v0c, Gnb4, Hsp90aa1, Atp5b, Tbc1d2b, Ak2, Guk1, Srgap2, Ndel1, Aldoa, Atp5o, Gnai3, Ccl24, Dock4, Atp5f1, Atp1b3, Rragc, Rfc3, Gmps, Ak4, Psmc5, Pip5k1a, Abcc5, Gch1, Pnp, Rhoj, Dab2ip, Mras, Tap1, Iigp1, Abcb1b, Rhoa, Tbcc, Myh9, Entpd1, Tbc1d5, Srpr, Rnf213, Pkp4, Pkm2, Gnai2, Tubb5, Rap2c, Map2k1,
GO:0002682	regulation of immune syst	0.02880 ( 65 of 2257 genes )	0.01982 ( 674 of 34011 annotated genes )	4.811e-05	0.153	Clec7a, Nck1, Pdcd1lg2, Mapkapk2, Psen1, Xcl1, Ccr7, Cd44, Hsp90aa1, Niacr1, Cd38, Lgals1, C9, Ripk2, Tnf, Il2rg, Cfp, Fcgr3, Cd47, Tap1, Trafd1, Ccr1, Nlrc5, Adam8, Tmem173, Pycard, Pld2, Tnip3, Pvr, Cd209a, Psmb4, Trim30a, Dnaja3, Cx3cl1, Prkca, Edn1, Tlr2, 2010106G01Rik, Lyst, Acvr2a, C5ar1, Thbs1, Cd86, Cnr1, Myo1f, Hif1a, Ifit1, Calca, Ppp3cb, Ube2n, Bcr, Csf1, Socs6, Pnp, Ap3b1, Cmklr1, Fkb…
GO:0006725	cellular aromatic compoun	0.01063 ( 24 of 2257 genes )	0.00500 ( 170 of 34011 annotated genes )	5.152e-05	0.1638	Mthfd1l, Anpep, Sult1d1, Gch1, Aadat, Pcbd2, Atic, Ly6e, Moxd1, Mthfd1, Hdc, Qdpr, Gphn, Mocos, Tdo2, Pgcp, Kynu, Aldh1l2, Xdh, Folh1, Dpysl3, Fech, Mocs2, Dpysl2,
GO:0009306	protein secretion	0.00975 ( 22 of 2257 genes )	0.00438 ( 149 of 34011 annotated genes )	5.252e-05	0.167	Pnp, Tlr2, Lmf1, Clec5a, Clec4e, Psg22, Abca1, Ccr7, Plek, Lyst, Pycard, Mif, Il1a, Rbpj, Casp1, S100a13, Clec4n, Chi3l1, Tnf, Adam9, Cx3cl1, Cd14,
GO:0044275	cellular carbohydrate cat	0.00753 ( 17 of 2257 genes )	0.00291 ( 99 of 34011 annotated genes )	5.362e-05	0.1705	Hibadh, Hk2, Agl, Pygl, Glb1, Ldha, Mif, Gpi1, Aldoa, Hif1a, Pkm2, Ier3, Bpgm, Pgk1, Pgam1, Pgm2, Aldoc,
GO:0016043	cellular component organi	0.11520 ( 260 of 2257 genes )	0.10476 ( 3563 of 34011 annotated genes )	5.959e-05	0.1895	Clec7a, Vps54, Prdx6, Atp6v0c, Hsp90aa1, Ccl7, Rest, Tada2a, Ttn, Dgkh, Gsn, Zmym4, Aldh1a1, Jmjd6, Dact2, Nsfl1c, Nupr1, Ptpn11, Prpf6, Papd7, Dab2ip, Hmgcr, Abca1, Kcnb1, Fam40b, P2ry2, Epb4.1, Il1a, Gypa, Rbpj, Chaf1b, Tmed10, Myo3a, Cd209a, Rab8a, Nphs1, Cenpj, Dpysl3, Mapre2, Rnf4, Daam1, Bnip3, Mrpl39, Lyst, Tnik, Mtpn, Hspg2, Cnr1, Rrs1, Srgap2, Ndel1, Ube2n, Pip5k1a, Caprin1, Ywhab, D7Ert…
GO:0006096	glycolysis	0.00532 ( 12 of 2257 genes )	0.00162 ( 55 of 34011 annotated genes )	6.094e-05	0.1938	Gpi1, Hk2, Aldoa, Pkm2, Hif1a, Ier3, Bpgm, Pgk1, Pgam1, Aldoc, Ldha, Mif,
GO:0009141	nucleoside triphosphate m	0.02304 ( 52 of 2257 genes )	0.01497 ( 509 of 34011 annotated genes )	6.214e-05	0.1976	Ctps, Rhot1, Tuba8, Nme5, Tbc1d8, Nme4, Ccr7, Arhgap6, Atp6v0c, Gnb4, Hsp90aa1, Atp5b, Tbc1d2b, Ak2, Guk1, Srgap2, Ndel1, Aldoa, Atp5o, Gnai3, Ccl24, Dock4, Atp5f1, Atp1b3, Rragc, Rfc3, Ak4, Psmc5, Pip5k1a, Abcc5, Gch1, Pnp, Dab2ip, Rhoj, Mras, Tap1, Iigp1, Abcb1b, Rhoa, Tbcc, Myh9, Entpd1, Tbc1d5, Entpd7, Srpr, Rnf213, Pkp4, Pkm2, Gnai2, Tubb5, Rap2c, Map2k1,
GO:0009605	response to external stim	0.03545 ( 80 of 2257 genes )	0.02599 ( 884 of 34011 annotated genes )	6.306e-05	0.2005	Clec7a, Nfe2l2, Agl, Scn1b, Higd1a, Tnfrsf1b, Psen1, Sbno2, Atg13, Ccr7, Xcl1, Cyr61, Ccl7, Ldha, Cysltr1, Ccl17, Dock4, Tnf, Fabp7, Grin3a, Fcgr3, Cd47, Apoe, Hmgcr, Ccr1, Abca1, Stat1, Plek, Adam8, Cx3cr1, Pafah1b2, Gsdmd, Slc2a1, Cd34, Psmb4, Scoc, Cxcl1, Larp1, Fech, Cx3cl1, Ccl12, Prkca, Edn1, Egr2, Klf7, Tlr2, Accn3, Ccl4, Csf3r, Lyst, C5ar1, Thbs1, Kdr, Cnr1, Cmtm3, Ndel1, Kynu, Ccl24, Cal…
GO:0006163	purine nucleotide metabol	0.02969 ( 67 of 2257 genes )	0.02079 ( 707 of 34011 annotated genes )	6.307e-05	0.2006	Tuba8, Nme5, Tbc1d8, Atic, Nme4, Lhb, Ccr7, Arhgap6, Atp6v0c, Hddc3, Hsp90aa1, Atp5b, Ak2, Cnn3, Gnai3, Dock4, Atp5f1, Ak4, Gch1, Dab2ip, Mras, Tap1, Apoe, Abca1, Rhoa, Tbcc, Tbc1d5, Rnf213, Pkm2, Gnai2, Vip, Oas1a, Rap2c, Edn1, Rhot1, Nppa, Nudt9, Gnb4, Tbc1d2b, Mthfd1, Srgap2, Guk1, Ndel1, Aldoa, Atp5o, Ccl24, Atp1b3, Calca, Rragc, Rfc3, Psmc5, Gmps, Abcc5, Pip5k1a, Pnp, Rhoj, Iigp1, Abcb1b, My…
GO:0007243	intracellular protein kin	0.03146 ( 71 of 2257 genes )	0.02238 ( 761 of 34011 annotated genes )	6.313e-05	0.2008	Psen1, Ccr7, Cd44, Cyr61, Osm, Stk3, Dusp19, A430084P05Rik, S100a13, Lgals1, Clec4n, Chi3l1, Ripk2, Tnf, Mapk6, Mapksp1, Ikbkap, Adam9, Psmd10, Ptpn11, Dab2ip, Hmgcr, Ccr1, Stat1, Rhoa, Smad1, Plek, Adam8, Rps6ka4, Tnip3, Il1a, Eef1d, Ltbr, Litaf, B230120H23Rik, Nphs1, Gnai2, Cenpj, Pebp1, Dnaja3, Prkca, Edn1, Prl, Tlr2, Prlr, Tnik, Dusp6, Thbs1, Kdr, Cnksr3, Zdhhc17, Trim38, Ube2n, Tlr1, Pdgfa, …
GO:0007596	blood coagulation	0.00842 ( 19 of 2257 genes )	0.00353 ( 120 of 34011 annotated genes )	6.367e-05	0.2025	Nfe2l2, Pdgfa, Slc7a11, Ap3b1, Vwf, Apoe, F13a1, Fga, Plek, Lyst, Entpd1, Thbs1, Cd34, P2rx1, Fgg, C9, F5, Cx3cl1, Prkca,
GO:0045088	regulation of innate immu	0.00842 ( 19 of 2257 genes )	0.00353 ( 120 of 34011 annotated genes )	6.367e-05	0.2025	Clec7a, Tlr2, Mapkapk2, Tap1, Trafd1, Ccr1, Nlrc5, Gimap5, Xcl1, Adam8, Tmem173, Pycard, Tnip3, Cd86, Pvr, Myo1f, Trim30a, Ripk2, Dnaja3,
GO:0023014	signal transduction via p	0.03190 ( 72 of 2257 genes )	0.02279 ( 775 of 34011 annotated genes )	6.425e-05	0.2043	Psen1, Ccr7, Cd44, Cyr61, Osm, Stk3, Dusp19, A430084P05Rik, S100a13, Lgals1, Clec4n, Chi3l1, Ripk2, Tnf, Mapk6, Mapksp1, Ikbkap, Adam9, Psmd10, Ptpn11, Dab2ip, Hmgcr, Ccr1, Stat1, Rhoa, Smad1, Plek, Adam8, Rps6ka4, Tnip3, Il1a, Eef1d, Ltbr, Litaf, B230120H23Rik, Nphs1, Gnai2, Cenpj, Pebp1, Dnaja3, Prkca, Edn1, Prl, Tlr2, Prlr, Acvr2a, Tnik, Dusp6, Thbs1, Kdr, Cnksr3, Zdhhc17, Trim38, Ube2n, Tlr1,…
GO:0071706	tumor necrosis factor sup	0.00620 ( 14 of 2257 genes )	0.00215 ( 73 of 34011 annotated genes )	6.951e-05	0.221	Clec7a, Thbs1, Tlr2, Fcgr3, Cd34, Mapkapk2, Trim30a, Ripk2, Ccl4, Ccr7, Adam8, Tspo, Cd14, Tlr1,
GO:0072521	purine-containing compoun	0.03101 ( 70 of 2257 genes )	0.02205 ( 750 of 34011 annotated genes )	7.005e-05	0.2228	Tuba8, Nme5, Tbc1d8, Atic, Nme4, Lhb, Ccr7, Arhgap6, Atp6v0c, Hddc3, Hsp90aa1, Atp5b, Ak2, Cnn3, Gnai3, Dock4, Atp5f1, Ak4, Gch1, Dab2ip, Mras, Tap1, Apoe, Abca1, Rhoa, Tbcc, Tbc1d5, Rnf213, Pkm2, Gnai2, Vip, Oas1a, Rap2c, Edn1, Macrod2, Rhot1, Nppa, Nudt9, Gnb4, Mthfd1, Tbc1d2b, Srgap2, Guk1, Ndel1, Aldoa, Atp5o, Ccl24, Calca, Atp1b3, Qtrtd1, Rragc, Rfc3, Psmc5, Gmps, Abcc5, Pip5k1a, Pnp, Rhoj, …
GO:0042592	homeostatic process	0.04386 ( 99 of 2257 genes )	0.03390 ( 1153 of 34011 annotated genes )	7.029e-05	0.2235	Immt, Scn1b, Vps54, Ckb, Psen1, Xcl1, Atp6v0c, Cd44, Csrp3, Txnl1, Ehd1, Egln1, Atp5b, Txndc9, Niacr1, Cd38, Dnajc16, Slc6a12, Ppt1, Tmx1, Tnf, Jmjd6, Pou3f2, Sfxn1, Bpgm, Rhag, Tspo, Ptpn11, Nr5a2, Vsig1, Tap1, Apoe, Hmgcr, Ccr1, Abca1, Smad1, Adam8, P2ry2, Bcl2l1, Rfx6, Diap1, Il1a, Trdn, Cd34, Ldlr, Nucb2, Cxcl1, Fech, Dnaja3, Glrx2, Cx3cl1, Prkca, Edn1, Egr2, Rhot1, Bnip3, Pygl, Fbxl5, Lyst, …
GO:0007599	hemostasis	0.00842 ( 19 of 2257 genes )	0.00356 ( 121 of 34011 annotated genes )	7.147e-05	0.2273	Nfe2l2, Pdgfa, Slc7a11, Ap3b1, Vwf, Apoe, F13a1, Fga, Plek, Lyst, Entpd1, Thbs1, Cd34, P2rx1, Fgg, C9, F5, Cx3cl1, Prkca,
GO:0050880	regulation of blood vesse	0.00842 ( 19 of 2257 genes )	0.00356 ( 121 of 34011 annotated genes )	7.147e-05	0.2273	Gch1, Nppa, Apoe, Hmgcr, P2ry2, Cysltr1, Kdr, Cd38, P2rx1, Hif1a, Calca, Vip, Nts, Icam1, Plod3, Adm, Cx3cl1, Edn1, Map2k1,
GO:0032940	secretion by cell	0.02481 ( 56 of 2257 genes )	0.01658 ( 564 of 34011 annotated genes )	7.21e-05	0.2293	Tlr2, Psg22, Psen1, Ccr7, Lyst, Acvr2a, Osm, Rest, Cnr1, Ica1, Myo1f, Niacr1, Casp1, Cd38, S100a13, Clec4n, Chi3l1, Ppt1, Tnf, Unc13c, Ppp3cb, Rab3c, Bcr, Adam9, Dpysl2, Exoc4, Ptpn11, Pnp, Scamp1, Lmf1, Clec5a, Fcgr3, Clec4e, Hmgcr, Ccr1, Abca1, Ly6e, Plek, Rfx6, Crh, Pycard, Pld2, Mif, Il1a, Exoc6b, Rbpj, P2rx1, Rab8a, Il1b, Snap23, Kit, Cx3cl1, Cd14, Adm, Edn1, Prkca,
GO:0035556	intracellular signal tran	0.05893 ( 133 of 2257 genes )	0.04837 ( 1645 of 34011 annotated genes )	7.23e-05	0.2299	Ccr7, Ttn, A430084P05Rik, Rapgefl1, Lgals1, Clec4n, Chi3l1, Gsn, Mapk6, Ikbkap, Rab3c, Nupr1, Ptpn11, Dab2ip, Mras, Hmgcr, Abca1, Stat1, Plek, Adam8, Rps6ka4, Tnip3, Tbc1d5, Il1a, Rgs6, Rab8a, Cish, Nphs1, Gnai2, Cenpj, Pea15a, Pebp1, Rap2c, Edn1, Prl, Rhot1, Tlr2, Prlr, Fgd5, Ccl4, Rab44, Tnik, Dusp6, Thbs1, Kdr, Tbc1d2b, Cnr1, Srgap2, Ndel1, Hif1a, Prkd3, Amotl1, Ube2n, Rgl1, Exoc4, Tlr1, Tox3,…
GO:0035150	regulation of tube size	0.00842 ( 19 of 2257 genes )	0.00359 ( 122 of 34011 annotated genes )	8.01e-05	0.2547	Gch1, Nppa, Apoe, Hmgcr, P2ry2, Cysltr1, Kdr, Cd38, P2rx1, Hif1a, Calca, Vip, Nts, Icam1, Plod3, Adm, Cx3cl1, Edn1, Map2k1,
GO:0046164	alcohol catabolic process	0.00709 ( 16 of 2257 genes )	0.00273 ( 93 of 34011 annotated genes )	8.596e-05	0.2733	Hibadh, Hk2, Adh4, Glb1, Ldha, Mif, Gpi1, Aldoa, Hif1a, Pkm2, Ier3, Bpgm, Pgk1, Pgam1, Pgm2, Aldoc,
GO:0044270	cellular nitrogen compoun	0.02393 ( 54 of 2257 genes )	0.01599 ( 544 of 34011 annotated genes )	9.674e-05	0.3076	Aadat, Rhot1, Tuba8, Tbc1d8, Nudt9, Ccr7, Arhgap6, Atp6v0c, Gnb4, Hsp90aa1, Atp5b, Tbc1d2b, Srgap2, Ndel1, Kynu, Aldh1l2, Cnn3, Atp5o, Gnai3, Ccl24, Dock4, Atp5f1, Rragc, Rfc3, Dpysl2, Psmc5, Blvrb, Pip5k1a, Abcc5, Gch1, Pnp, Rhoj, Dab2ip, Mras, Tap1, Allc, Iigp1, Abcb1b, Rhoa, Tbcc, Myh9, Entpd1, Tbc1d5, Entpd7, Srpr, Tdo2, Rnf213, Pkp4, Xdh, Gnai2, Tubb5, Dpysl3, Rap2c, Map2k1,
GO:0009205	purine ribonucleoside tri	0.02215 ( 50 of 2257 genes )	0.01447 ( 492 of 34011 annotated genes )	9.695e-05	0.3083	Rhot1, Tuba8, Nme5, Tbc1d8, Nme4, Ccr7, Arhgap6, Atp6v0c, Gnb4, Hsp90aa1, Atp5b, Tbc1d2b, Ak2, Guk1, Srgap2, Ndel1, Aldoa, Atp5o, Gnai3, Ccl24, Dock4, Atp5f1, Atp1b3, Rragc, Rfc3, Ak4, Psmc5, Pip5k1a, Abcc5, Gch1, Pnp, Dab2ip, Rhoj, Mras, Tap1, Iigp1, Abcb1b, Rhoa, Tbcc, Myh9, Entpd1, Tbc1d5, Srpr, Rnf213, Pkp4, Pkm2, Gnai2, Tubb5, Rap2c, Map2k1,
GO:0031331	positive regulation of ce	0.00709 ( 16 of 2257 genes )	0.00276 ( 94 of 34011 annotated genes )	9.806e-05	0.3118	Rnf180, Dab2, Tnfrsf1b, Sh3d19, Apoe, Psen1, Acsl5, Adam8, Pafah1b2, Mif, Il1b, Tnf, Scoc, Larp1, Adam9, Psmd10,
GO:0007010	cytoskeleton organization	0.02924 ( 66 of 2257 genes )	0.02073 ( 705 of 34011 annotated genes )	0.0001019	0.324	Tmsb10, Nck1, Tuba8, Ptpn1, Vps54, Ywhah, Ccr7, Arhgap6, Fmn2, Ccl7, Gan, Ttn, Senp6, Cnn3, Gsn, Zmym4, Rnd1, Ehd2, Dpysl2, Tnfaip1, Tln1, Fam40b, Add2, Rhoa, Pfn4, Plek, Kif3b, Iqsec2, Epb4.1, Diap1, Gypa, Pstpip2, B230120H23Rik, Nphs1, Dync1li2, Cenpj, Dpysl3, Myo1b, Rnf4, Daam1, Edn1, Sh3d19, Vim, Ranbp1, Ap1g1, Gzma, Tnik, Prex1, Cnn1, Srgap2, Epb4.9, Myo1f, Ndel1, Ccl24, Bcr, Mtm1, Pdgfa, Pi…
GO:0016310	phosphorylation	0.05272 ( 119 of 2257 genes )	0.04272 ( 1453 of 34011 annotated genes )	0.0001022	0.325	Bub1b, Hk2, Nck1, Dab2, Nme5, Ckb, Mapkapk2, Psen1, Nme4, Ccr7, Cd44, Cyr61, Osm, Ak2, Stk3, Dusp19, Ttn, Chi3l1, Polr2i, Ripk2, Dgkh, Ndufs4, Ppp2r5d, Tnf, Mapk6, Mapksp1, Agk, Ikbkap, Grk4, Adam9, Psmd10, Ak4, Dnajc3, Ptpn11, Dab2ip, Galk2, Apoe, Hmgcr, Nlrc5, Tlk2, Aldh18a1, Smad1, Adam8, Stk31, Rps6ka4, Pdk1, Pip5kl1, Pfkfb3, Myo3a, Camk2g, Pkm2, Cish, B230120H23Rik, Gnai2, Sgms2, Pebp1, Fech…
GO:0009108	coenzyme biosynthetic pro	0.00620 ( 14 of 2257 genes )	0.00223 ( 76 of 34011 annotated genes )	0.0001097	0.349	Mthfd1, Mthfd1l, Acly, Qdpr, Gch1, Gphn, Pnp, Pcbd2, Mocos, Nampt, Coq5, Kynu, Atic, Mocs2,
GO:0050707	regulation of cytokine se	0.00576 ( 13 of 2257 genes )	0.00197 ( 67 of 34011 annotated genes )	0.0001104	0.3509	Il1a, Tlr2, Clec5a, Casp1, Clec4e, Psg22, Clec4n, Tnf, Ccr7, Cx3cl1, Cd14, Pycard, Mif,
GO:0044085	cellular component biogen	0.05228 ( 118 of 2257 genes )	0.04243 ( 1443 of 34011 annotated genes )	0.0001162	0.3694	Tmsb10, Pcbd2, Nck1, Tuba8, Nudt21, Prdx6, Psen1, Ddx56, Atg13, Ccr7, Arhgap6, Hsp90aa1, Aldh1a7, Rrp1b, Cyr61, Ehd1, Capg, Ttn, Tex11, Senp6, Mphosph6, Dgkh, Ndufs4, Gsn, Tnf, Aldh1a1, Plod3, Psmd10, Birc2, Pin4, Nupr1, Gch1, Prpf6, Rps2, Tnfaip1, Tln1, Rpl5, Apoe, Hmgcr, Kcnb1, Abca1, Add2, Rhoa, Smad1, Plek, Tbcc, Kif3b, Cyfip1, Bysl, Diap1, Chaf1b, Tmed10, Cd34, Nop10, Myo3a, Rab8a, Prpf31, N…
GO:0044093	positive regulation of mo	0.03633 ( 82 of 2257 genes )	0.02731 ( 929 of 34011 annotated genes )	0.0001181	0.3755	Psen1, Plaa, Ccr7, Arhgap6, Eno1, Cyr61, Rest, Stk3, C9, Chi3l1, Ripk2, Dgkh, Dock4, Tnf, Mapksp1, Agk, Adam9, Psmd10, Gch1, Ptpn11, Lmf1, Dab2ip, Apoe, Add2, Rhoa, Plek, Adam8, Tmem173, Tnfsf10, Pycard, Epb4.1, Psme1, Cish, Gnai2, Vip, Cycs, Dnaja3, Ppap2b, Edn1, Psmd14, Tlr2, Psme2, Prlr, Fn1, Tnik, Mtpn, Senp1, Pdcd6, Thbs1, Txn1, Srgap2, Ndel1, Ccl24, Calca, Ube2n, Tlr1, Csf1, Pdgfa, Rnf7, Pi…
GO:0002237	response to molecule of b	0.01196 ( 27 of 2257 genes )	0.00626 ( 213 of 34011 annotated genes )	0.0001203	0.3824	Gch1, Tlr2, Tnfrsf1b, Mapkapk2, Ccr1, Abca1, Stat1, Ccr7, Gbp6, C5ar1, Mif, Tnip3, Cnr1, Fcgr2b, Mir484, Casp1, Litaf, Mir217, Ripk2, Il1b, Tnf, Bcr, Adam9, Cd14, Adm, Tlr1, Prkca,
GO:0008015	blood circulation	0.01595 ( 36 of 2257 genes )	0.00941 ( 320 of 34011 annotated genes )	0.0001236	0.3932	Scn1b, Nppa, Ccl4, Csrp3, Cysltr1, Kdr, Cnr1, Cd38, Hif1a, F5, Calca, Plod3, Uts2d, Gch1, Smad5, Apoe, Hmgcr, Stat1, P2ry2, Crh, Mif, Gja1, Trdn, Cd34, P2rx1, Ier3, Pebp1, Vip, Ace2, Nts, Icam1, Adm, Cx3cl1, Edn1, Map2k1, Prkca,
GO:0006913	nucleocytoplasmic transpo	0.01462 ( 33 of 2257 genes )	0.00835 ( 284 of 34011 annotated genes )	0.0001262	0.4015	Snupn, Fyttd1, Prl, Egr2, Tlr2, Ipo7, Xpo5, Tnpo3, Smurf1, Ipo13, Rangap1, Txnip, Hsp90aa1, Ddx39, Txn1, Akap13, Tnf, Kpna6, Psmd10, Ptpn11, Dab2ip, Sec61b, Fzd1, l7Rn6, Tmem173, Kpnb1, Xpo6, Litaf, Stat3, Kpna3, Il1b, Xpo7, Kpna2,
GO:0006935	chemotaxis	0.01684 ( 38 of 2257 genes )	0.01014 ( 345 of 34011 annotated genes )	0.0001269	0.4036	Egr2, Scn1b, Klf7, Ccl4, Csf3r, Xcl1, Ccr7, Lyst, C5ar1, Cyr61, Ccl7, Cysltr1, Thbs1, Kdr, Cmtm3, Ccl17, Ccl24, Dock4, Calca, Fpr1, Pdgfa, Pip5k1a, Fcgr3, Cmklr1, Ccr1, Cx3cr1, Adam8, Mif, Ccl6, Il1b, Cxcl1, Robo1, Ager, Kit, Ccl12, Cx3cl1, Edn1, Prkca,
GO:0006007	glucose catabolic process	0.00576 ( 13 of 2257 genes )	0.00200 ( 68 of 34011 annotated genes )	0.0001293	0.411	Gpi1, Hibadh, Hk2, Aldoa, Pkm2, Hif1a, Ier3, Pgk1, Bpgm, Pgam1, Aldoc, Ldha, Mif,
GO:0009144	purine nucleoside triphos	0.02215 ( 50 of 2257 genes )	0.01464 ( 498 of 34011 annotated genes )	0.0001305	0.415	Rhot1, Tuba8, Nme5, Tbc1d8, Nme4, Ccr7, Arhgap6, Atp6v0c, Gnb4, Hsp90aa1, Atp5b, Tbc1d2b, Ak2, Guk1, Srgap2, Ndel1, Aldoa, Atp5o, Gnai3, Ccl24, Dock4, Atp5f1, Atp1b3, Rragc, Rfc3, Ak4, Psmc5, Pip5k1a, Abcc5, Gch1, Pnp, Dab2ip, Rhoj, Mras, Tap1, Iigp1, Abcb1b, Rhoa, Tbcc, Myh9, Entpd1, Tbc1d5, Srpr, Rnf213, Pkp4, Pkm2, Gnai2, Tubb5, Rap2c, Map2k1,
GO:0003013	circulatory system proces	0.01595 ( 36 of 2257 genes )	0.00944 ( 321 of 34011 annotated genes )	0.0001316	0.4186	Scn1b, Nppa, Ccl4, Csrp3, Cysltr1, Kdr, Cnr1, Cd38, Hif1a, F5, Calca, Plod3, Uts2d, Gch1, Smad5, Apoe, Hmgcr, Stat1, P2ry2, Crh, Mif, Gja1, Trdn, Cd34, P2rx1, Ier3, Pebp1, Vip, Ace2, Nts, Icam1, Adm, Cx3cl1, Edn1, Map2k1, Prkca,
GO:0003018	vascular process in circu	0.00886 ( 20 of 2257 genes )	0.00403 ( 137 of 34011 annotated genes )	0.0001321	0.4201	Gch1, Nppa, Apoe, Hmgcr, Ccl4, P2ry2, Cysltr1, Kdr, Cd38, P2rx1, Hif1a, Calca, Vip, Nts, Icam1, Plod3, Adm, Cx3cl1, Edn1, Map2k1,
GO:0042330	taxis	0.01684 ( 38 of 2257 genes )	0.01017 ( 346 of 34011 annotated genes )	0.0001347	0.4284	Egr2, Scn1b, Klf7, Ccl4, Csf3r, Xcl1, Ccr7, Lyst, C5ar1, Cyr61, Ccl7, Cysltr1, Thbs1, Kdr, Cmtm3, Ccl17, Ccl24, Dock4, Calca, Fpr1, Pdgfa, Pip5k1a, Fcgr3, Cmklr1, Ccr1, Cx3cr1, Adam8, Mif, Ccl6, Il1b, Cxcl1, Robo1, Ager, Kit, Ccl12, Cx3cl1, Edn1, Prkca,
GO:0016126	sterol biosynthetic proce	0.00443 ( 10 of 2257 genes )	0.00126 ( 43 of 34011 annotated genes )	0.0001409	0.4482	Insig2, Ch25h, Cyp51, Apoe, Hmgcr, Fdft1, Hsd17b7, Sc4mol, Ebp, Lss,
GO:0070727	cellular macromolecule lo	0.02880 ( 65 of 2257 genes )	0.02058 ( 700 of 34011 annotated genes )	0.0001444	0.4591	Bub1b, Timm23, Ipo7, Xpo5, Ywhah, Rangap1, Hsp90aa1, Sar1b, Ehd1, Agxt, Tnf, Mapksp1, Armcx3, Psmd10, Ptpn11, Dab2ip, Stau1, Sec61b, Tap1, l7Rn6, Tmem173, Bcl2l1, Kpnb1, Diap1, Tmed10, Xpo6, Litaf, Xpo7, Snx6, Snupn, Egr2, Prl, Ap3s1, Tlr2, Smurf1, Tnpo3, Ipo13, Ppp2r5a, Txnip, Timm8a1, Ap1g1, Pdcd6, Txn1, Sumo3, Ifit1, Mrpl45, Ankrd13c, Kpna6, Exoc4, Pip5k1a, Ap3b1, Ywhab, Tmem30a, Fzd1, Stx6, T…
GO:0051345	positive regulation of hy	0.01639 ( 37 of 2257 genes )	0.00985 ( 335 of 34011 annotated genes )	0.0001462	0.4649	Psmd14, Psme2, Ccr7, Arhgap6, Fn1, Cyr61, Rest, Pdcd6, Senp1, Srgap2, Ndel1, C9, Ccl24, Dock4, Tnf, Calca, Rnf7, Pip5k1a, Gpr139, Lmf1, Dab2ip, Rhoa, Plek, Fam162a, Tnfsf10, Pycard, P2rx1, Psme1, Pkp4, Tgm2, Xdh, Apaf1, Robo1, Cycs, Dnaja3, Edn1, Map2k1,
GO:0051603	proteolysis involved in c	0.01595 ( 36 of 2257 genes )	0.00950 ( 323 of 34011 annotated genes )	0.000149	0.4737	Psmd14, Psmb10, Dab2, Psmb6, Psen1, Smurf1, Psma3, Fbxl5, Gzma, Sumo3, Psma5, Commd1, Ube2n, Psmb3, Dnajc3, Psmc5, Psmd10, Pcnp, Birc2, Socs6, Dub1, Rnf180, Tnfaip1, Sec61b, Anapc10, Isg15, Tgfb1i1, Psma6, Tceb1, Usp25, Psmb2, Psmb4, Usp18, Psmb7, Rnf4, Usp36,
GO:0006979	response to oxidative str	0.01108 ( 25 of 2257 genes )	0.00567 ( 193 of 34011 annotated genes )	0.0001496	0.4758	Nfe2l2, Ucp2, Bnip3, Nme5, Epx, Prdx6, Apoe, Psen1, Crygd, Oxsr1, Txnip, Pld2, Ppp1r15b, Cd38, Hif1a, Trpm2, Camk2g, Aldh1a1, Cycs, Glrx2, Aldh3b1, Adam9, Nfkb1, Map2k1, Prkca,
GO:0009966	regulation of signal tran	0.05272 ( 119 of 2257 genes )	0.04313 ( 1467 of 34011 annotated genes )	0.0001506	0.4789	Ptpn1, Dab2, Tbc1d8, Psen1, Ccr7, Cd44, Chst11, Cyr61, Osm, Stk3, Dusp19, Ttn, A430084P05Rik, S100a13, Lgals1, Clec4n, Chi3l1, Ripk2, Ppp2r5d, Dock4, Tnf, Rgs16, Mapksp1, Nphp3, Grk4, Psmd10, Nfkb1, Ptpn11, Tnfaip1, Dab2ip, Apoe, Hmgcr, Ccr1, Nlrc5, Stat1, Rhoa, Plek, Adam8, Iqsec2, Pld2, Tnip3, Tbc1d5, Il1a, Rbpj, Rgs6, Eef1d, Ltbr, Cish, Trim30a, Litaf, Cenpj, Vip, Pebp1, Snx6, Dnaja3, Aspn, Pp…
GO:0006919	activation of caspase act	0.00576 ( 13 of 2257 genes )	0.00203 ( 69 of 34011 annotated genes )	0.0001509	0.4798	Rnf7, P2rx1, C9, Apaf1, Xdh, Tnf, Robo1, Cycs, Dnaja3, Fam162a, Pycard, Pdcd6, Senp1,
GO:0061024	membrane organization	0.02437 ( 55 of 2257 genes )	0.01667 ( 567 of 34011 annotated genes )	0.0001524	0.4846	Clec7a, Spnb1, Bnip3, Ptpn1, Dab2, Stx8, Ppp2r5a, Ccr7, Ap1g1, Hsp90aa1, Ehd1, Atp5b, Thbs1, Ly75, Ndel1, Gnai3, Ppt1, Calca, Jmjd6, Afg3l1, Grk4, Nsfl1c, Bcr, Ehd2, Sgip1, Pip5k1a, Scamp1, Chchd3, Fcgr3, Cd47, Ap3b1, Apoe, Abca1, Stx6, Gimap5, Afg3l2, Vamp8, Adam8, Lrp8, Bcl2l1, Pld2, Fcgr2b, Ldlr, Cd209a, Rab8a, Tgm2, Gria2, Snap23, Arr3, Ndrg1, Dnaja3, Cd14, Adm, Clint1, Prkca,
GO:0048585	negative regulation of re	0.02703 ( 61 of 2257 genes )	0.01908 ( 649 of 34011 annotated genes )	0.0001642	0.5223	Dab2, Tnfrsf1b, Phb2, Psen1, Smurf1, Xcl1, Cd44, Chst11, Skor2, Dusp6, Thbs1, Stk3, Cnksr3, Hif1a, Ifit1, Rgs16, Calca, Ppp3cb, Fabp7, Nphp3, Grk4, Mefv, Bcr, Psmd10, Socs6, Grin3a, Tnfaip1, Dab2ip, Tap1, Apoe, Hmgcr, Trafd1, Ccr1, Nlrc5, Rgs18, Fzd1, Stat1, Rhoa, Mapkapk5, Plek, Tgfb1i1, Pld2, Mif, Tnip3, Cd59b, Fcgr2b, Pak1ip1, Rgs6, Psmb4, Cish, Trim30a, Ier3, Xdh, Il1b, Robo1, Pebp1, Snx6, Dn…
GO:0051169	nuclear transport	0.01462 ( 33 of 2257 genes )	0.00847 ( 288 of 34011 annotated genes )	0.0001644	0.5229	Snupn, Fyttd1, Prl, Egr2, Tlr2, Ipo7, Xpo5, Tnpo3, Smurf1, Ipo13, Rangap1, Txnip, Hsp90aa1, Ddx39, Txn1, Akap13, Tnf, Kpna6, Psmd10, Ptpn11, Dab2ip, Sec61b, Fzd1, l7Rn6, Tmem173, Kpnb1, Xpo6, Litaf, Stat3, Kpna3, Il1b, Xpo7, Kpna2,
GO:0006605	protein targeting	0.01639 ( 37 of 2257 genes )	0.00991 ( 337 of 34011 annotated genes )	0.0001648	0.5242	Snupn, Prl, Egr2, Tlr2, Ipo7, Xpo5, Tnpo3, Smurf1, Ipo13, Rangap1, Txnip, Timm8a1, Hsp90aa1, Txn1, Agxt, Tnf, Kpna6, Exoc4, Psmd10, Pip5k1a, Ptpn11, Dab2ip, Ap3b1, Ywhab, Sec61b, Fzd1, l7Rn6, Tmem173, Kpnb1, Srpr, Xpo6, Litaf, Stat3, Kpna3, Il1b, Xpo7, Kpna2,
GO:0006139	nucleobase, nucleoside, n	0.13381 ( 302 of 2257 genes )	0.12602 ( 4286 of 34011 annotated genes )	0.0001788	0.5686	Nfe2l2, Mapkapk2, 4930447C04Rik, Sbno2, Atic, Ddx56, Asz1, Lhb, Atp6v0c, Hsp90aa1, Rest, Tada2a, Ak2, Gspt1, Jmjd6, Prpf4, Ikbkap, Zfp516, Lhx5, Prpf6, Papd7, Npas3, Dab2ip, 0610031J06Rik, Foxn3, Mras, Tap1, Nlrc5, Abca1, Tbcc, Pycard, Tceb1, Il1a, Rbpj, Chaf1b, 2700060E02Rik, Pkm2, Nr1i2, Gnai2, Dpysl3, Snx6, Oas1a, Rnf4, Hivep1, Tlr2, Rhot1, Bnip3, Srsf3, Mtpn, Tsen2, Gemin7, Txn1, Srgap2, Ndel…
GO:0010646	regulation of cell commun	0.04785 ( 108 of 2257 genes )	0.03861 ( 1313 of 34011 annotated genes )	0.0001795	0.5708	Dab2, Psen1, Ccr7, Cd44, Chst11, Cyr61, Osm, Rest, Stk3, Niacr1, Cd38, A430084P05Rik, S100a13, Lgals1, Clec4n, Chi3l1, Ripk2, Ppp2r5d, Tnf, Rgs16, Mapksp1, Nphp3, Grk4, Dpysl2, Psmd10, Nfkb1, Ptpn11, Tnfaip1, Dab2ip, Hmgcr, Ccr1, Nlrc5, Stat1, Rhoa, Plek, Adam8, Pafah1b2, Rfx6, Pld2, Tnip3, Il1a, Rbpj, Rgs6, Eef1d, Rab8a, Ltbr, Cish, Trim30a, Litaf, Gnai2, Scoc, Cenpj, Pebp1, Snx6, Larp1, Dnaja3,…
GO:0006412	translation	0.01949 ( 44 of 2257 genes )	0.01255 ( 427 of 34011 annotated genes )	0.0001813	0.5764	Nck1, Eif3c, Eif2s1, Igf2bp2, Mrpl39, Mrpl15, Denr, Eif4e, Thbs1, Eif4a1, Gspt1, Eif1b, Mrpl9, Tnf, Igf2bp3, Eif3k, Hars, Eif3b, Rps2, Caprin1, Eif1ad, Sarnp, Rpl5, Pa2g4, Mapkapk5, Rpl23, Rps5, Ppp1r15b, Eef1e1, Eftud2, Mrpl35, Mrpl51, Mrps30, Rpl10, Eef1d, Rpl3, Rars, Rplp1, Aimp2, Ncbp2, Mrpl27, Fech, Mrpl23, Prkca,
GO:0010467	gene expression	0.11874 ( 268 of 2257 genes )	0.11032 ( 3752 of 34011 annotated genes )	0.000186	0.5915	Nfe2l2, Mapkapk2, 4930447C04Rik, Sbno2, Ddx56, Asz1, Mir133b, Denr, Eif4e, Rest, Tada2a, Gspt1, Jmjd6, Prpf4, Ikbkap, Eif3k, Zfp516, Lhx5, Prpf6, Npas3, Dab2ip, 0610031J06Rik, Foxn3, Nlrc5, Pycard, Tceb1, Il1a, Rbpj, Chaf1b, Rplp1, 2700060E02Rik, Nr1i2, Snx6, Rnf4, Mrpl23, Mir34c, Hivep1, Tlr2, Bnip3, Srsf3, Mrpl39, Mtpn, Tsen2, Gemin7, Txn1, Polr2h, Qtrtd1, Ube2n, Tox3, Sox21, Caprin1, Ywhab, D7…
GO:0009967	positive regulation of si	0.02658 ( 60 of 2257 genes )	0.01879 ( 639 of 34011 annotated genes )	0.0001899	0.604	Prl, Tlr2, Dab2, Ccl4, Ccr7, Cd44, Acvr2a, Cyr61, Osm, Kdr, Thbs1, Stk3, A430084P05Rik, S100a13, Hif1a, Lgals1, Clec4n, Chi3l1, Ripk2, Trim38, Zdhhc17, Ppp2r5d, Csnk2b, Tnf, Mapksp1, Ube2n, Exoc4, Nfkb1, Csf1, Pdgfa, Ptpn11, Dab2ip, Pdcd11, Fkbp1a, Hmgcr, Ccr1, Nlrc5, Adam8, Spred2, Tgfb1i1, Shoc2, Pld2, Mif, Il1a, Eef1e1, Rbpj, Gja1, Eef1d, Ltbr, Csnk2a1, Tgm2, Stat3, Litaf, Il1b, Cenpj, Pebp1, …
GO:0034205	beta-amyloid formation	0.00133 ( 3 of 2257 genes )	0.00009 ( 3 of 34011 annotated genes )	0.0001961	0.6237	Pion, Tmed10, Fkbp1a,
GO:0072679	thymocyte migration	0.00133 ( 3 of 2257 genes )	0.00009 ( 3 of 34011 annotated genes )	0.0001961	0.6237	Ccr7, Xcl1, Adam8,
GO:2000410	regulation of thymocyte m	0.00133 ( 3 of 2257 genes )	0.00009 ( 3 of 34011 annotated genes )	0.0001961	0.6237	Ccr7, Xcl1, Adam8,
GO:2000412	positive regulation of th	0.00133 ( 3 of 2257 genes )	0.00009 ( 3 of 34011 annotated genes )	0.0001961	0.6237	Ccr7, Xcl1, Adam8,
GO:0032640	tumor necrosis factor pro	0.00576 ( 13 of 2257 genes )	0.00209 ( 71 of 34011 annotated genes )	0.0002035	0.6473	Clec7a, Thbs1, Tlr2, Fcgr3, Cd34, Mapkapk2, Trim30a, Ripk2, Ccl4, Ccr7, Tspo, Cd14, Tlr1,
GO:0032680	regulation of tumor necro	0.00576 ( 13 of 2257 genes )	0.00209 ( 71 of 34011 annotated genes )	0.0002035	0.6473	Clec7a, Thbs1, Tlr2, Fcgr3, Cd34, Mapkapk2, Trim30a, Ripk2, Ccl4, Ccr7, Tspo, Cd14, Tlr1,
GO:0051188	cofactor biosynthetic pro	0.00753 ( 17 of 2257 genes )	0.00323 ( 110 of 34011 annotated genes )	0.0002048	0.6513	Spnb1, Mthfd1l, Acly, Gch1, Pnp, Pcbd2, Nampt, Atic, Tmem14c, Mthfd1, Gphn, Qdpr, Mocos, Kynu, Coq5, Fech, Mocs2,
GO:0034613	cellular protein localiza	0.02836 ( 64 of 2257 genes )	0.02049 ( 697 of 34011 annotated genes )	0.0002203	0.7005	Bub1b, Timm23, Ipo7, Xpo5, Ywhah, Rangap1, Hsp90aa1, Sar1b, Ehd1, Agxt, Tnf, Mapksp1, Armcx3, Psmd10, Ptpn11, Dab2ip, Sec61b, Tap1, l7Rn6, Tmem173, Bcl2l1, Kpnb1, Diap1, Tmed10, Xpo6, Litaf, Xpo7, Snx6, Snupn, Egr2, Prl, Ap3s1, Tlr2, Smurf1, Tnpo3, Ipo13, Ppp2r5a, Txnip, Timm8a1, Ap1g1, Pdcd6, Txn1, Sumo3, Ifit1, Mrpl45, Ankrd13c, Kpna6, Exoc4, Pip5k1a, Ap3b1, Ywhab, Tmem30a, Stx6, Fzd1, Timm17a,…
GO:0016044	cellular membrane organiz	0.02393 ( 54 of 2257 genes )	0.01652 ( 562 of 34011 annotated genes )	0.0002205	0.7012	Clec7a, Spnb1, Bnip3, Ptpn1, Dab2, Stx8, Ppp2r5a, Ccr7, Ap1g1, Hsp90aa1, Ehd1, Atp5b, Thbs1, Ly75, Ndel1, Gnai3, Ppt1, Calca, Jmjd6, Afg3l1, Grk4, Bcr, Ehd2, Sgip1, Pip5k1a, Scamp1, Chchd3, Fcgr3, Cd47, Ap3b1, Apoe, Abca1, Stx6, Gimap5, Afg3l2, Vamp8, Adam8, Lrp8, Bcl2l1, Pld2, Fcgr2b, Ldlr, Cd209a, Rab8a, Tgm2, Gria2, Snap23, Arr3, Ndrg1, Dnaja3, Cd14, Adm, Clint1, Prkca,
GO:0045785	positive regulation of ce	0.00798 ( 18 of 2257 genes )	0.00356 ( 121 of 34011 annotated genes )	0.0002208	0.702	Csf1, Cd47, Nid1, Cd44, Adam8, Cyr61, Pld2, Thbs1, Kdr, Lgals1, Tgm2, Il1b, Tnf, Calca, Ppap2b, Cx3cl1, Adam9, Prkca,
GO:0044255	cellular lipid metabolic	0.02747 ( 62 of 2257 genes )	0.01973 ( 671 of 34011 annotated genes )	0.0002317	0.7369	Acly, Degs1, Alg9, Prdx6, Adh4, Tmem195, Smpdl3b, Scd2, Pgs1, Lyst, Gbgt1, Cyr61, Pla2g2d, Fasn, Elovl3, Cnr1, Slc22a4, Dpagt1, Acsm2, Dgkh, Aldh1a1, Fdft1, Agk, Acot2, Mtm1, Elovl2, Prkab1, Crat, Hpgd, Pip5k1a, Insig2, Ppap2a, Pdgfa, Ptpn11, Ch25h, Lmf1, Apoe, Hmgcr, Mboat1, Acsl5, Plek, Asah2, Pla2g2a, Sc4mol, Ptgr1, Pld2, Mif, Pip5kl1, Cyp2c65, Retsat, Pigu, P2rx1, Ldlr, Lass6, Ip6k1, Inpp5b, …
GO:0019236	response to pheromone	0.00709 ( 16 of 2257 genes )	0.00297 ( 101 of 34011 annotated genes )	0.0002329	0.7406	Vmn1r43, Vmn1r206, Vmn1r208, Vmn1r231, Vmn1r227, Vmn1r188, Vmn1r73, Vmn1r192, Vmn1r28, Vmn1r218, Vmn1r18, Vmn1r203, Vmn1r47, Vmn1r19, Vmn1r235, Vmn1r220,
GO:0010647	positive regulation of ce	0.02836 ( 64 of 2257 genes )	0.02055 ( 699 of 34011 annotated genes )	0.0002382	0.7575	Dab2, Ccr7, Cd44, Cyr61, Osm, Stk3, A430084P05Rik, S100a13, Lgals1, Clec4n, Chi3l1, Ripk2, Ppp2r5d, Tnf, Mapksp1, Nfkb1, Ptpn11, Dab2ip, Hmgcr, Ccr1, Nlrc5, Adam8, Pafah1b2, Pld2, Il1a, Rbpj, Eef1d, Ltbr, Litaf, Scoc, Cenpj, Pebp1, Larp1, Prkca, Prl, Tlr2, Ccl4, Acvr2a, Thbs1, Kdr, Hif1a, Zdhhc17, Trim38, Csnk2b, Ube2n, Exoc4, Csf1, Pdgfa, Pdcd11, Fkbp1a, Spred2, Mif, Shoc2, Tgfb1i1, Eef1e1, Gja1…
GO:0050729	positive regulation of in	0.00532 ( 12 of 2257 genes )	0.00185 ( 63 of 34011 annotated genes )	0.0002409	0.766	Cnr1, Cd47, Fcgr3, Tgm2, Il1b, Ccl24, Tnf, Ager, Ccr7, Adam8, Mif, Prkca,
GO:0050878	regulation of body fluid	0.01108 ( 25 of 2257 genes )	0.00585 ( 199 of 34011 annotated genes )	0.0002423	0.7704	Nfe2l2, Pdgfa, Slc7a11, Ap3b1, Vwf, Prlr, Apoe, F13a1, Fga, Plek, Lyst, P2ry2, Entpd1, Thbs1, Csn3, Cd34, P2rx1, Hif1a, Fgg, C9, Xdh, F5, Cx3cl1, Prkca, Edn1,
GO:0001666	response to hypoxia	0.00798 ( 18 of 2257 genes )	0.00359 ( 122 of 34011 annotated genes )	0.0002451	0.7794	Birc2, Bnip3, Higd1a, Hyou1, Loxl2, Adam8, Fam162a, Plau, Pld2, Egln1, Kdr, Cd38, Casp1, Npepps, Hif1a, Camk2g, Acot2, Edn1,
GO:0072593	reactive oxygen species m	0.00753 ( 17 of 2257 genes )	0.00329 ( 112 of 34011 annotated genes )	0.0002555	0.8125	Nfe2l2, Prdx4, Thbs1, Cybb, Ndufs3, Bnip3, Epx, Prdx6, Trim30a, Ier3, Ndufs4, Xdh, Cycs, Tspo, Cyr61, Plau, Edn1,
GO:0030162	regulation of proteolysis	0.01108 ( 25 of 2257 genes )	0.00588 ( 200 of 34011 annotated genes )	0.0002619	0.8327	Psmd14, Rnf180, Dab2, Tnfrsf1b, Sh3d19, Serpina3n, Serpinb8, Apoe, Serpinh1, Psen1, Serpinb3a, Adam8, Cd59b, Thbs1, Pion, Serpinb11, Sumo3, Serpinb9, Il1b, Tnf, Serpinb2, Commd1, Adam9, Psmd10, Serpinb3c,
GO:0045321	leukocyte activation	0.02260 ( 51 of 2257 genes )	0.01549 ( 527 of 34011 annotated genes )	0.0002743	0.8722	Clec7a, Psmb10, Tlr2, Nck1, Pdcd1lg2, Rnf8, Psen1, Sbno2, Ccr7, Lyst, Hsp90aa1, Cd86, Thbs1, Cnr1, Ddost, Myo1f, Casp1, Cd38, Lgals1, Ripk2, Jmjd6, Ppp3cb, Bcr, Adam9, Il2rg, Tlr1, Gapt, Socs6, Pnp, Fcgr3, Cd47, Ap3b1, Fkbp1a, Gimap5, Myh9, Adam8, Pfdn1, Cx3cr1, Pld2, Mif, Cd59b, Fcgr2b, Rbpj, Il2rb, Cd209a, Il1b, Ndrg1, Icam1, Kit, Dnaja3, Zfp36l2,
GO:0006811	ion transport	0.03500 ( 79 of 2257 genes )	0.02687 ( 914 of 34011 annotated genes )	0.0002986	0.9495	Scn1b, Psen1, Ano3, Ywhah, Gpr89, Atp10a, Xcl1, Atp6v0c, Atp2b4, Slc38a11, Rest, Cysltr1, Atp5b, Cybb, Pllp, Agxt, Atp11a, Atp5f1, Tnf, Sfxn1, Plcb4, Kcne3, Slc12a4, Rhag, Tspo, Clca6, Slco1a4, Grin3a, Slc39a10, Ccr1, Kcnb1, Add2, S100a6, Slc13a1, Diap1, Trdn, Camk2g, Vip, Cxcl1, Vdac3, Slc44a1, Slc9a10, Lasp1, Accn3, Slc30a6, Cox6c, Ccl4, Vdac2, Slc31a1, Clcn7, Cnr1, Slc22a4, Cnksr3, Slc4a1, Trp…
GO:0006996	organelle organization	0.06336 ( 143 of 2257 genes )	0.05448 ( 1853 of 34011 annotated genes )	0.0003183	1	Bub1b, Tuba8, Vps54, Ywhah, Atg13, Ccr7, Arhgap6, Atp6v0c, Hsp90aa1, Ccl7, Rest, Tada2a, Parl, Ttn, Cnn3, Gsn, Zmym4, Jmjd6, Nsfl1c, Papd7, Tln1, Abca1, Fam40b, Plek, Pfn4, Kif3b, Rps6ka4, Epb4.1, Il1a, Gypa, Chaf1b, Tmed10, Rab8a, Pstpip2, Nphs1, Cenpj, Pebp1, Dpysl3, Mapre2, Rnf4, Gm14160, Clint1, Daam1, Edn1, Bnip3, Syce2, Mrpl39, Chmp5, Lyst, H2afz, Timm8a1, Tnik, Rrs1, Srgap2, Ndel1, Ube2n, …
GO:0043123	positive regulation of I-	0.00709 ( 16 of 2257 genes )	0.00306 ( 104 of 34011 annotated genes )	0.000328	1	Pdcd11, Fkbp1a, Il1a, Gja1, Eef1d, Lgals1, S100a13, Litaf, Tgm2, Clec4n, Zdhhc17, Il1b, Trim38, Ripk2, Tnf, Ube2n,
GO:0002252	immune effector process	0.01684 ( 38 of 2257 genes )	0.01067 ( 363 of 34011 annotated genes )	0.0003537	1	Clec7a, Tlr2, Bnip3, Rnf8, Psen1, Sbno2, Xcl1, Ccr7, Lyst, Cd86, Myo1f, Cxcl9, Serpinb9, Lgals1, C9, Ripk2, Ifit1, Tnf, Ppp3cb, Bcr, Cfp, Pnp, Fcgr3, Cd47, Tap1, Gimap5, Tmem173, Cx3cr1, Pycard, Pld2, Mif, Cd59b, Fcgr2b, Pvr, Itgax, Icam1, Kit, Fcnb,
GO:0030334	regulation of cell migrat	0.01728 ( 39 of 2257 genes )	0.01106 ( 376 of 34011 annotated genes )	0.0003585	1	Tlr2, Xcl1, Ccr7, Cyr61, Ccl7, Thbs1, Kdr, Myo1f, Lamb1, Hif1a, Ccl24, Csnk2b, Amotl1, Bcr, Adam9, Csf1, Pdgfa, Apoe, Cmklr1, Ccr1, Rhoa, Cx3cr1, P2ry2, Adam8, Pld2, Mif, Plau, Diap1, Ager, Dpysl3, Rap2c, Icam1, Kit, Cx3cl1, Ppap2b, Zfp640, Edn1, Map2k1, Prkca,
GO:0001817	regulation of cytokine pr	0.01595 ( 36 of 2257 genes )	0.00994 ( 338 of 34011 annotated genes )	0.0003598	1	Clec7a, Tlr2, Psg22, Mapkapk2, Ccl4, Xcl1, Ccr7, Thbs1, Darc, Casp1, Hif1a, Clec4n, Ripk2, Tnf, Calca, Mefv, Tspo, Tlr1, Nfkb1, Clec5a, Fcgr3, Clec4e, Cmklr1, Gimap5, P2ry2, Adam8, Pycard, Mif, Fcgr2b, Il1a, Cd34, Litaf, Trim30a, Il1b, Cd14, Cx3cl1,
GO:0045833	negative regulation of li	0.00443 ( 10 of 2257 genes )	0.00141 ( 48 of 34011 annotated genes )	0.0003688	1	Cnr1, Pdgfa, Insig2, Niacr1, Apoe, Ppp2r5a, Il1b, Tnf, Gimap5, Rest,
GO:0001660	fever generation	0.00222 ( 5 of 2257 genes )	0.00035 ( 12 of 34011 annotated genes )	0.0003704	1	Ccr1, Il1b, Cnr1, Tnf, Il1a,
GO:0022610	biological adhesion	0.03146 ( 71 of 2257 genes )	0.02376 ( 808 of 34011 annotated genes )	0.000372	1	Clec7a, Mybpc2, Dsg4, Psen1, Arhgap6, Cd44, Cyr61, Parvb, Atp5b, Siglece, Lamb1, Lgals1, F5, Gsn, Tnf, Rnd1, Dact2, Fat3, Adam9, Ptpn11, Cd47, Tln1, Rhoa, Gbp6, Plek, Mllt4, Adam8, Adam15, Pld2, Bysl, Pvr, Rbpj, Cd34, Nphs1, Itgax, Cx3cl1, Ppap2b, Prkca, Tgfbi, Cxcr7, Slc7a11, Vwf, Prlr, Adam2, Csf3r, Lamc1, Fn1, Thbs1, Kdr, Srgap2, Fbln7, Myo1f, D930014E17Rik, Cntnap5b, Calca, Csf1, Pip5k1a, Jam…
GO:0009185	ribonucleoside diphosphat	0.00266 ( 6 of 2257 genes )	0.00053 ( 18 of 34011 annotated genes )	0.0003872	1	Ak2, Nudt9, Entpd7, Guk1, Entpd1, Atp5b,
GO:0050714	positive regulation of pr	0.00576 ( 13 of 2257 genes )	0.00223 ( 76 of 34011 annotated genes )	0.0004084	1	Il1a, Tlr2, Clec5a, Casp1, Clec4e, Psg22, Clec4n, Tnf, Ccr7, Adam9, Cd14, Pycard, Mif,
GO:0009617	response to bacterium	0.01639 ( 37 of 2257 genes )	0.01038 ( 353 of 34011 annotated genes )	0.0004095	1	Tlr2, Tnfrsf1b, Mapkapk2, Ccr7, Lyst, C5ar1, Cnr1, Myo1f, Casp1, Serpinb9, Mir217, Ripk2, Tnf, Bcr, Adam9, Tlr1, Gch1, Cd47, Defb3, Iigp1, Ccr1, Abca1, Stat1, Gbp6, Sp110, Mif, Tnip3, Prg2, Fcgr2b, Mir484, Rbpj, Defb2, Litaf, Il1b, Cd14, Adm, Prkca,
GO:0030593	neutrophil chemotaxis	0.00443 ( 10 of 2257 genes )	0.00144 ( 49 of 34011 annotated genes )	0.0004394	1	Fcgr3, Il1b, Csf3r, Xcl1, Ccr7, Cxcl1, C5ar1, Cx3cl1, Edn1, Prkca,
GO:0051341	regulation of oxidoreduct	0.00443 ( 10 of 2257 genes )	0.00144 ( 49 of 34011 annotated genes )	0.0004394	1	Cnr1, Gch1, Ecsit, Apoe, Il1b, Tnf, Acvr2a, Gzma, Edn1, Nfkb1,
GO:0071842	cellular component organi	0.08906 ( 201 of 2257 genes )	0.08100 ( 2755 of 34011 annotated genes )	0.0004399	1	Bub1b, Scn1b, Dnase1l3, Tuba8, Vps54, Prdx6, Ywhah, Atg13, Ccr7, Arhgap6, Atp6v0c, Hsp90aa1, Ccl7, Rest, Tada2a, Parl, Ttn, Cnn3, Lamb1, Lgals1, Gsn, Zmym4, Jmjd6, Nsfl1c, Ptpn11, Prpf6, Papd7, Grin3a, Tln1, Abca1, Fam40b, Plek, Pfn4, P2ry2, Kif3b, Rps6ka4, Trove2, Epb4.1, Il1a, Gypa, Chaf1b, Tmed10, Myo3a, Rab8a, Pstpip2, Nphs1, Cenpj, Pebp1, Dpysl3, Mapre2, Rnf4, Cycs, Gm14160, Clint1, Daam1, E…
GO:0032501	multicellular organismal	0.17545 ( 396 of 2257 genes )	0.17218 ( 5856 of 34011 annotated genes )	0.0004424	1	Clec7a, Nfe2l2, Olfr707, Anpep, Mybpc2, Vps54, Mapkapk2, Olfr821, Olfr740, 4930447C04Rik, Asz1, Mir133b, Olfr196, Hsp90aa1, Olfr1457, Rest, Gpi1, Ttn, Mtl5, Aldh1a1, Jmjd6, Dact2, Vmn1r47, Tspo, Olfr787, Olfr187, Nupr1, Ptpn11, Lhx5, Npas3, Dab2ip, Foxn3, Hmgcr, Abca1, Prol1, Olfr837, P2ry2, Pycard, Il1a, Rbpj, Rgs6, Olfr1137, Olfr1341, Myo3a, Rab8a, Pkm2, Nphs1, Gnai2, Adam24, Dpysl3, Vdac3, Tas…
GO:0030029	actin filament-based proc	0.01772 ( 40 of 2257 genes )	0.01156 ( 393 of 34011 annotated genes )	0.0004446	1	Tmsb10, Nck1, Ptpn1, Ccr7, Arhgap6, Tnik, Fmn2, Prex1, Cnn1, Myo1f, Epb4.9, Srgap2, Ttn, Cnn3, Gsn, Ccl24, Rnd1, Bcr, Ehd2, Pip5k1a, Pdgfa, Tnfaip1, Rhoj, Tln1, Add2, Rhoa, Pfn4, Plek, Myh9, Pfdn1, Iqsec2, Epb4.1, Myl6, Diap1, Nphs1, Dpysl3, Myo1b, Kit, Daam1, Edn1,
GO:0016125	sterol metabolic process	0.00709 ( 16 of 2257 genes )	0.00315 ( 107 of 34011 annotated genes )	0.000455	1	Cyp27a1, Insig2, Ch25h, Cyp51, Lmf1, Ldlr, Apoe, Hmgcr, Abca1, Hdlbp, Fdft1, Fech, Hsd17b7, Sc4mol, Lss, Ebp,
GO:0006413	translational initiation	0.00620 ( 14 of 2257 genes )	0.00256 ( 87 of 34011 annotated genes )	0.0004753	1	Ppp1r15b, Eif3b, Rps2, Eif3c, Eif2s1, Eif1ad, Eif4a1, Eif1b, Tnf, Ncbp2, Fech, Denr, Eif3k, Eif4e,
GO:0009132	nucleoside diphosphate me	0.00354 ( 8 of 2257 genes )	0.00097 ( 33 of 34011 annotated genes )	0.000482	1	Nme4, Ak2, Nudt9, Entpd7, Guk1, Nme5, Entpd1, Atp5b,
GO:0009894	regulation of catabolic p	0.01994 ( 45 of 2257 genes )	0.01353 ( 460 of 34011 annotated genes )	0.0004828	1	Psmd14, Dab2, Tnfrsf1b, Sh3d19, Tbc1d8, Psen1, Ccr7, Arhgap6, Tbc1d2b, Cnr1, Srgap2, Niacr1, Sumo3, Ndel1, Cnn3, Hif1a, Ccl24, Dock4, Tnf, Commd1, Adam9, Psmd10, Pip5k1a, Rnf180, Dab2ip, Iigp1, Apoe, Gimap5, Acsl5, Adam8, Pafah1b2, Mif, Tbc1d5, Gja1, Ldlr, Snx1, Pkp4, Trim30a, Ier3, Il1b, Scoc, Vip, Larp1, Pgam1, Map2k1,
GO:0007155	cell adhesion	0.03101 ( 70 of 2257 genes )	0.02358 ( 802 of 34011 annotated genes )	0.0004907	1	Clec7a, Mybpc2, Dsg4, Psen1, Arhgap6, Cd44, Cyr61, Parvb, Atp5b, Siglece, Lamb1, Lgals1, F5, Gsn, Tnf, Rnd1, Dact2, Fat3, Adam9, Ptpn11, Cd47, Tln1, Rhoa, Plek, Mllt4, Adam8, Adam15, Pld2, Bysl, Pvr, Rbpj, Cd34, Nphs1, Itgax, Cx3cl1, Ppap2b, Prkca, Tgfbi, Cxcr7, Slc7a11, Vwf, Prlr, Adam2, Csf3r, Lamc1, Fn1, Thbs1, Kdr, Srgap2, Fbln7, Myo1f, D930014E17Rik, Cntnap5b, Calca, Csf1, Pip5k1a, Jam2, Nid…
GO:0022603	regulation of anatomical	0.02082 ( 47 of 2257 genes )	0.01432 ( 487 of 34011 annotated genes )	0.0004941	1	Bnip3, Dab2, Sh3d19, Psg22, Phb2, Psen1, Ywhah, Vim, Cd44, Tnik, Cysltr1, Egln1, Dusp6, Kdr, Thbs1, Ndel1, Chi3l1, Ccl24, Tnf, Zmym4, Pou3f2, Adam9, Csf1, Pdgfa, Mtap1b, Dab2ip, Caprin1, Fzd1, Stat1, Cx3cr1, Lrp8, Tgfb1i1, Mif, Plau, Erap1, Il1a, Rbpj, Gja1, Cd34, Il1b, Scarf1, Robo1, Cx3cl1, Adm, Aspn, Edn1, Prkca,
GO:0070482	response to oxygen levels	0.00975 ( 22 of 2257 genes )	0.00512 ( 174 of 34011 annotated genes )	0.0005077	1	Birc2, Bnip3, Higd1a, Hyou1, Mir133b, Loxl2, Mir379, Adam8, Fam162a, Plau, Egln1, Pld2, Kdr, Cd38, Casp1, Npepps, Camk2g, Hif1a, Mir335, Mir365-1, Acot2, Edn1,
GO:0006760	folic acid-containing com	0.00266 ( 6 of 2257 genes )	0.00056 ( 19 of 34011 annotated genes )	0.0005382	1	Mthfd1, Mthfd1l, Folh1, Gch1, Aldh1l2, Atic,
GO:0008610	lipid biosynthetic proces	0.01905 ( 43 of 2257 genes )	0.01282 ( 436 of 34011 annotated genes )	0.0005384	1	Acly, Degs1, Alg9, Cyp51, Tmem195, Scd2, Pgs1, Cyr61, Rest, Lss, Ebp, Fasn, Elovl3, Dpagt1, Tnf, Aldh1a1, Fdft1, Agk, Tspo, Elovl2, Prkab1, Insig2, Ppap2a, Pdgfa, Pip5k1a, Ch25h, Apoe, Hmgcr, Mboat1, Acsl5, Sc4mol, Crh, Mif, Pigu, Il1a, P2rx1, Ldlr, Lass6, Sgms2, Far1, Hsd17b7, Edn1, Pla2g16,
GO:0071219	cellular response to mole	0.00798 ( 18 of 2257 genes )	0.00382 ( 130 of 34011 annotated genes )	0.0005394	1	Tlr2, Tnfrsf1b, Abca1, Stat1, Gbp6, Mif, Tnip3, Fcgr2b, Mir484, Litaf, Mir217, Il1b, Ripk2, Tnf, Cd14, Adam9, Tlr1, Prkca,
GO:0007154	cell communication	0.06114 ( 138 of 2257 genes )	0.05298 ( 1802 of 34011 annotated genes )	0.0005514	1	Scn1b, Atg13, Ccr7, Xcl1, Chst11, Rest, A430084P05Rik, Lgals1, Clec4n, Chi3l1, Nfkb1, Ptpn11, Lhx5, Dab2ip, Hmgcr, Nlrc5, Abca1, Stat1, Plek, Adam8, Snx12, Tnip3, Il1a, Rbpj, Slc2a1, Rgs6, Rab8a, Cish, Gnai2, Scoc, Cenpj, Pebp1, Larp1, Snx6, Vdac3, Cx3cl1, Naalad2, Edn1, Prl, Tlr2, Smurf1, Ccl4, Ctsl, Acvr2a, Dusp6, Thbs1, Kdr, Cnr1, Ica1, Hif1a, Ppp3cb, Ube2n, Exoc4, Socs6, Gpr139, Pdcd11, Fkbp1…
GO:0030036	actin cytoskeleton organi	0.01684 ( 38 of 2257 genes )	0.01094 ( 372 of 34011 annotated genes )	0.0005678	1	Tmsb10, Nck1, Ptpn1, Ccr7, Arhgap6, Tnik, Fmn2, Prex1, Cnn1, Myo1f, Epb4.9, Ttn, Cnn3, Gsn, Ccl24, Rnd1, Bcr, Ehd2, Pdgfa, Pip5k1a, Tnfaip1, Rhoj, Tln1, Add2, Rhoa, Pfn4, Plek, Myh9, Pfdn1, Iqsec2, Epb4.1, Diap1, Nphs1, Dpysl3, Myo1b, Kit, Daam1, Edn1,
GO:0009135	purine nucleoside diphosp	0.00222 ( 5 of 2257 genes )	0.00038 ( 13 of 34011 annotated genes )	0.0005731	1	Ak2, Nudt9, Guk1, Entpd1, Atp5b,
GO:0009179	purine ribonucleoside dip	0.00222 ( 5 of 2257 genes )	0.00038 ( 13 of 34011 annotated genes )	0.0005731	1	Ak2, Nudt9, Guk1, Entpd1, Atp5b,
GO:0034109	homotypic cell-cell adhes	0.00399 ( 9 of 2257 genes )	0.00123 ( 42 of 34011 annotated genes )	0.0005779	1	Slc7a11, Lgals1, Il1b, Cd44, Plek, Adam8, Ppap2b, Map2k1, Prkca,
GO:0051247	positive regulation of pr	0.01994 ( 45 of 2257 genes )	0.01364 ( 464 of 34011 annotated genes )	0.0005798	1	Dab2, Tnfrsf1b, Sh3d19, Psen1, Smurf1, Ppp2r5a, Cd44, Acvr2a, Cyr61, Mtpn, Osm, Thbs1, Sumo3, Chi3l1, Ripk2, Csnk2b, Tnf, Commd1, Ube2n, Adam9, Psmd10, Csf1, Pdgfa, Nupr1, Rnf180, Apoe, Fkbp1a, Fzd1, Adam8, Lrp8, Crh, Rps6ka4, Mif, Gja1, Snx1, Trim30a, Ier3, Il1b, Aimp2, Vip, Rap2c, Kit, Dnaja3, Ppap2b, Prkca,
GO:0001525	angiogenesis	0.01551 ( 35 of 2257 genes )	0.00982 ( 334 of 34011 annotated genes )	0.00058	1	Anpep, Psg22, Cyr61, Cysltr1, Hspg2, Egln1, Atp5b, Gpi1, Thbs1, Kdr, Hif1a, Chi3l1, Ccl24, Jmjd6, Pdgfa, Smad5, Stat1, Loxl2, Myh9, Cx3cr1, Adam8, Adam15, Plau, Mmp19, Erap1, Il1a, Rbpj, Cd34, Il1b, Robo1, Adm, Ccl12, Cx3cl1, Edn1, Prkca,
GO:0005975	carbohydrate metabolic pr	0.02348 ( 53 of 2257 genes )	0.01685 ( 573 of 34011 annotated genes )	0.0006179	1	Acly, Hk2, Agl, St3gal5, Pygl, Csgalnact1, Psen1, Glb1, Cd44, Chst11, Mlec, Gbgt1, Ldha, Gpi1, Ddost, Guk1, Dpagt1, Aldoa, Hif1a, Chi3l1, Man2c1, Tnf, Rpn2, Bpgm, Pgm2, G6pd2, Hibadh, Mdh2, Lmf1, Galk2, Alg8, Gys2, Dusp12, Plek, Mif, Pdk1, Rpn1, Gns, Pomt2, Fggy, Fut11, Pfkfb3, Itih3, Pkm2, Ier3, Ip6k1, Il1b, Pgk1, Pgam1, Ggta1, Cs, Aldoc, St3gal4,
GO:0043085	positive regulation of ca	0.02924 ( 66 of 2257 genes )	0.02217 ( 754 of 34011 annotated genes )	0.0006488	1	Psen1, Plaa, Ccr7, Arhgap6, Cyr61, Rest, Stk3, C9, Chi3l1, Dgkh, Dock4, Tnf, Mapksp1, Agk, Adam9, Psmd10, Gch1, Ptpn11, Lmf1, Dab2ip, Apoe, Rhoa, Plek, Adam8, Tnfsf10, Pycard, Psme1, Cish, Gnai2, Vip, Cycs, Dnaja3, Edn1, Psmd14, Psme2, Prlr, Fn1, Tnik, Senp1, Pdcd6, Thbs1, Srgap2, Ndel1, Ccl24, Calca, Ube2n, Tlr1, Csf1, Rnf7, Pdgfa, Pip5k1a, Gpr139, Ywhab, Dusp12, Fam162a, Lrp8, Mif, P2rx1, Pkp4,…
GO:0008203	cholesterol metabolic pro	0.00665 ( 15 of 2257 genes )	0.00294 ( 100 of 34011 annotated genes )	0.0006542	1	Cyp27a1, Insig2, Ch25h, Cyp51, Lmf1, Ldlr, Apoe, Hmgcr, Abca1, Hdlbp, Fdft1, Fech, Hsd17b7, Lss, Ebp,
GO:0023056	positive regulation of si	0.02747 ( 62 of 2257 genes )	0.02055 ( 699 of 34011 annotated genes )	0.0006691	1	Prl, Tlr2, Dab2, Psen1, Ccl4, Ccr7, Cd44, Acvr2a, Cyr61, Osm, Kdr, Thbs1, Stk3, A430084P05Rik, S100a13, Hif1a, Lgals1, Clec4n, Chi3l1, Ripk2, Trim38, Zdhhc17, Ppp2r5d, Csnk2b, Tnf, Mapksp1, Ube2n, Exoc4, Nfkb1, Csf1, Pdgfa, Ptpn11, Dab2ip, Pdcd11, Fkbp1a, Hmgcr, Ccr1, Nlrc5, Adam8, Spred2, Tgfb1i1, Shoc2, Pld2, Mif, Il1a, Eef1e1, Rbpj, Gja1, Eef1d, Ltbr, Csnk2a1, Tgm2, Stat3, Litaf, Il1b, Gria2, …
GO:0051239	regulation of multicellul	0.06070 ( 137 of 2257 genes )	0.05281 ( 1796 of 34011 annotated genes )	0.0006746	1	Clec7a, Nfe2l2, Scn1b, Mapkapk2, Ywhah, Mir133b, Ccr7, Xcl1, Csrp3, Hsp90aa1, Rest, Cysltr1, Darc, Lgals1, Clec4n, Chi3l1, Bglap, Tspo, Nfkb1, Nupr1, Ptpn11, Lhx5, Dab2ip, Hmgcr, Stat1, Prol1, Plek, Adam8, P2ry2, Pycard, Il1a, Erap1, Rbpj, Rgs6, Rab8a, Nphs1, Gnai2, Pebp1, Dpysl3, Cx3cl1, Edn1, Prl, Tlr2, Prlr, Psg22, Smurf1, Ccl4, Acvr2a, Tnik, Mtpn, Dusp6, Thbs1, Kdr, Cnr1, Ica1, Ndel1, Hif1a, …
GO:0042493	response to drug	0.00975 ( 22 of 2257 genes )	0.00523 ( 178 of 34011 annotated genes )	0.000693	1	Pnp, Tlr2, Papd7, Abcb1b, Fzd1, Stat1, Rhoa, Smad1, Lyst, Emx2, Rest, Cyp2c65, Cybb, Cd38, Casp1, Slco1b2, Nr1i2, Il1b, Abcg2, Aldh1a1, Ppp3cb, Ggh,
GO:0055085	transmembrane transport	0.03234 ( 73 of 2257 genes )	0.02514 ( 855 of 34011 annotated genes )	0.0006981	1	Scn1b, Psen1, Gpr89, Atp6v0c, Slc25a3, Hsp90aa1, Rest, Atp5b, Cybb, Slc35b1, Slc25a40, Atp5f1, Tnf, Sfxn1, Kcne3, Slc12a4, Rhag, Clca6, Psmd10, Slco1a4, Grin3a, Dab2ip, Slc39a10, Tap1, Kcnb1, Tmem173, S100a6, Slc13a1, Slc2a1, Ldlr, Litaf, Abcg2, Sec61a1, Vdac3, Slc44a1, Nat3, Slc9a10, Tlr2, Slc7a11, Lasp1, Accn3, Slc30a6, Cox6c, Vdac2, Slc31a1, Txn1, Clcn7, Slc22a4, Slc4a1, Trpm2, Atp5o, Slc37a3,…
GO:0002673	regulation of acute infla	0.00443 ( 10 of 2257 genes )	0.00153 ( 52 of 34011 annotated genes )	0.0007218	1	Cd59b, Cnr1, Fcgr2b, Fcgr3, Ccr1, Il1b, Tnf, Ccr7, Adam8, Mif,
GO:0030168	platelet activation	0.00443 ( 10 of 2257 genes )	0.00153 ( 52 of 34011 annotated genes )	0.0007218	1	Pdgfa, Slc7a11, P2rx1, Vwf, Apoe, Fgg, Plek, Entpd1, Cx3cl1, Prkca,
GO:0023051	regulation of signaling	0.05848 ( 132 of 2257 genes )	0.05069 ( 1724 of 34011 annotated genes )	0.0007284	1	Ccr7, Chst11, Rest, Ttn, A430084P05Rik, Lgals1, Clec4n, Chi3l1, Nfkb1, Ptpn11, Dab2ip, Hmgcr, Nlrc5, Stat1, Plek, Adam8, Tnip3, Tbc1d5, Il1a, Rbpj, Rgs6, Rab8a, Cish, Gnai2, Cenpj, Pebp1, Snx6, Edn1, Prl, Tlr2, Fgd5, Smurf1, Ccl4, Chmp5, Acvr2a, Dusp6, Thbs1, Kdr, Tbc1d2b, Cnr1, Ica1, Srgap2, Ndel1, Hif1a, Ppp3cb, Ube2n, Rgl1, Exoc4, Tlr1, Cnksr2, Pip5k1a, Socs6, Pdcd11, Fkbp1a, Cmklr1, Lrp8, Mif…
GO:2000145	regulation of cell motili	0.01728 ( 39 of 2257 genes )	0.01147 ( 390 of 34011 annotated genes )	0.0007305	1	Tlr2, Xcl1, Ccr7, Cyr61, Ccl7, Thbs1, Kdr, Myo1f, Lamb1, Hif1a, Ccl24, Csnk2b, Amotl1, Bcr, Adam9, Csf1, Pdgfa, Apoe, Cmklr1, Ccr1, Rhoa, Cx3cr1, P2ry2, Adam8, Pld2, Mif, Plau, Diap1, Ager, Dpysl3, Rap2c, Icam1, Kit, Cx3cl1, Ppap2b, Zfp640, Edn1, Map2k1, Prkca,
GO:0000768	syncytium formation by pl	0.00266 ( 6 of 2257 genes )	0.00059 ( 20 of 34011 annotated genes )	0.0007312	1	Nphs1, Cd44, Casp1, Myh9, Adam8, Adam9,
GO:0035458	cellular response to inte	0.00266 ( 6 of 2257 genes )	0.00059 ( 20 of 34011 annotated genes )	0.0007312	1	Ifit1, Ifit3, Gbp6, Tmem173, Iigp1, Gm4951,
GO:0044262	cellular carbohydrate met	0.01905 ( 43 of 2257 genes )	0.01303 ( 443 of 34011 annotated genes )	0.0007446	1	Acly, Hk2, Agl, St3gal5, Pygl, Csgalnact1, Psen1, Glb1, Ldha, Gpi1, Ddost, Guk1, Dpagt1, Aldoa, Hif1a, Man2c1, Tnf, Rpn2, Bpgm, Pgm2, G6pd2, Hibadh, Mdh2, Lmf1, Galk2, Alg8, Gys2, Dusp12, Plek, Mif, Pdk1, Rpn1, Pomt2, Pfkfb3, Fut11, Pkm2, Ier3, Ip6k1, Pgk1, Pgam1, Cs, Aldoc, St3gal4,
GO:0050778	positive regulation of im	0.01285 ( 29 of 2257 genes )	0.00776 ( 264 of 34011 annotated genes )	0.000786	1	Clec7a, Pnp, Tlr2, Fcgr3, Mapkapk2, Tap1, Psen1, Gimap5, Xcl1, Ccr7, Cd44, Adam8, C5ar1, Tmem173, Pycard, Mif, Tnip3, Cd59b, Cd86, Cnr1, Pvr, Cd38, Trim30a, C9, Ripk2, Tnf, Fcnb, Ube2n, Cfp,
GO:0006396	RNA processing	0.02171 ( 49 of 2257 genes )	0.01544 ( 525 of 34011 annotated genes )	0.0007981	1	Nudt21, Mir196a-1, Srsf3, Rtcd1, Ddx56, Rrp1b, Fbl, Ddx39, Tsen2, Gemin7, Ddx1, Magohb, Wdr12, Mphosph6, Cwc15, Jmjd6, Prpf4, Qtrtd1, Lsm5, Ints8, Pin4, Prpf6, 0610007P22Rik, Rpl5, Pdcd11, Ptbp1, Pa2g4, Rbm17, Sf3a1, Lsm3, Dkc1, Esrp2, Nsun2, Lin28b, Eftud2, Nop10, Hnrnpc, Snrpe, Prpf31, Lsm10, Syf2, Prpf38a, Ftsjd2, Ncbp2, Dimt1, Snrpa1, Hnrnpa3, Pop4, Tbl3,
GO:0006606	protein import into nucle	0.01019 ( 23 of 2257 genes )	0.00565 ( 192 of 34011 annotated genes )	0.0008213	1	Snupn, Prl, Tlr2, Dab2ip, Ipo7, Sec61b, Tnpo3, Fzd1, Ipo13, l7Rn6, Txnip, Hsp90aa1, Tmem173, Txn1, Kpnb1, Kpna3, Stat3, Litaf, Il1b, Tnf, Kpna2, Kpna6, Psmd10,
GO:0051346	negative regulation of hy	0.01462 ( 33 of 2257 genes )	0.00926 ( 315 of 34011 annotated genes )	0.000822	1	Farp1, Tmem225, Cd44, Cflar, Gzma, Rrp1b, Gpi1, Thbs1, Stfa3, Cst7, Cstb, Serpinb9, Cnn3, Ifit1, Tnf, Serpinb2, Dab2ip, Mki67ip, Serpina3n, Serpinb8, Fkbp1a, Serpinh1, Prol1, Plek, Serpinb3a, Bcl2l1, Serpinb11, Itih3, Csnk2a1, Wfdc6b, Pebp1, Dnaja3, Serpinb3c,
GO:0042176	regulation of protein cat	0.00842 ( 19 of 2257 genes )	0.00429 ( 146 of 34011 annotated genes )	0.0008343	1	Psmd14, Rnf180, Dab2, Tnfrsf1b, Sh3d19, Apoe, Psen1, Adam8, Gja1, Sumo3, Snx1, Ier3, Trim30a, Il1b, Tnf, Vip, Commd1, Adam9, Psmd10,
GO:0044283	small molecule biosynthet	0.02481 ( 56 of 2257 genes )	0.01829 ( 622 of 34011 annotated genes )	0.000839	1	Ctps, Acly, Kdm3a, Degs1, Nme5, Pygl, Nppa, Bbox1, Atic, Nme4, Tmem195, Scd2, Atp5b, Mthfd1, Gpi1, Ak2, Fasn, Elovl3, Guk1, Agxt, Kynu, Dpagt1, Aldoa, Atp5o, Gnai3, Atp5f1, Tnf, Calca, Aldh1a1, Qtrtd1, Elovl2, Prkab1, Gmps, Insig2, Gch1, Pnp, Ch25h, Nampt, Apoe, Abca1, Aldh18a1, Sc4mol, Crh, Mif, Hdc, Lgsn, Pkm2, Prpsap1, Gnai2, Far1, Rrm1, Vip, Pgk1, Oas1a, Adm, Edn1,
GO:0008360	regulation of cell shape	0.00620 ( 14 of 2257 genes )	0.00271 ( 92 of 34011 annotated genes )	0.0008447	1	Kdr, Epb4.1, Diap1, Rhoj, Aldoa, S100a13, Brwd3, Ccl24, Fam40b, Myh9, Icam1, Kit, Ccl7, Cyfip1,
GO:0061025	membrane fusion	0.00532 ( 12 of 2257 genes )	0.00212 ( 72 of 34011 annotated genes )	0.0008559	1	Bnip3, Chchd3, Stx8, Rab8a, Gnai3, Stx6, Snap23, Afg3l2, Afg3l1, Vamp8, Adam8, Nsfl1c,
GO:0009260	ribonucleotide biosynthet	0.00576 ( 13 of 2257 genes )	0.00241 ( 82 of 34011 annotated genes )	0.0008634	1	Ctps, Ak2, Pnp, Guk1, Nme5, Aldoa, Pkm2, Atp5o, Atic, Nme4, Atp5f1, Gmps, Atp5b,
GO:0032496	response to lipopolysacch	0.01019 ( 23 of 2257 genes )	0.00567 ( 193 of 34011 annotated genes )	0.0008822	1	Gch1, Tnfrsf1b, Mapkapk2, Ccr1, Abca1, Stat1, Ccr7, Gbp6, Mif, Tnip3, Cnr1, Mir484, Casp1, Litaf, Mir217, Ripk2, Il1b, Tnf, Bcr, Adam9, Cd14, Adm, Prkca,
GO:0002675	positive regulation of ac	0.00310 ( 7 of 2257 genes )	0.00082 ( 28 of 34011 annotated genes )	0.0008903	1	Il1b, Cnr1, Tnf, Ccr7, Fcgr3, Adam8, Mif,
GO:0006364	rRNA processing	0.00665 ( 15 of 2257 genes )	0.00303 ( 103 of 34011 annotated genes )	0.0008959	1	Dkc1, Pin4, 0610007P22Rik, Wdr12, Nop10, Mphosph6, Rpl5, Pdcd11, Pa2g4, Ddx56, Dimt1, Rrp1b, Pop4, Tbl3, Fbl,
GO:0002274	myeloid leukocyte activat	0.00709 ( 16 of 2257 genes )	0.00335 ( 114 of 34011 annotated genes )	0.0009238	1	Tlr2, Fcgr3, Sbno2, Gimap5, Cx3cr1, Pld2, Thbs1, Cnr1, Myo1f, Casp1, Jmjd6, Ndrg1, Kit, Bcr, Adam9, Tlr1,
GO:0051170	nuclear import	0.01019 ( 23 of 2257 genes )	0.00570 ( 194 of 34011 annotated genes )	0.0009469	1	Snupn, Prl, Tlr2, Dab2ip, Ipo7, Sec61b, Tnpo3, Fzd1, Ipo13, l7Rn6, Txnip, Hsp90aa1, Tmem173, Txn1, Kpnb1, Kpna3, Stat3, Litaf, Il1b, Tnf, Kpna2, Kpna6, Psmd10,
GO:0070271	protein complex biogenesi	0.02836 ( 64 of 2257 genes )	0.02167 ( 737 of 34011 annotated genes )	0.0009484	1	Tmsb10, Pcbd2, Nck1, Tuba8, Nudt21, Hsp90aa1, Aldh1a7, Ehd1, Ttn, Senp6, Dgkh, Ndufs4, Gsn, Tnf, Aldh1a1, Psmd10, Birc2, Gch1, Nupr1, Tnfaip1, Hmgcr, Kcnb1, Add2, Rhoa, Smad1, Plek, Tbcc, Diap1, Tmed10, Nphs1, Snap23, Cenpj, Dpysl3, Rnf4, Dnaja3, Clint1, Aldoc, Vwf, Prlr, Pomp, Lamc1, Vdac2, Prex1, Gphn, Epb4.9, Ccl24, Prkab1, Psmg1, Mtap1b, Ssna1, Ywhab, Fkbp1a, Vamp8, Mif, Gja1, P2rx1, Xaf1, Tg…
GO:0035456	response to interferon-be	0.00266 ( 6 of 2257 genes )	0.00062 ( 21 of 34011 annotated genes )	0.0009737	1	Ifit1, Ifit3, Gbp6, Tmem173, Iigp1, Gm4951,
GO:0031329	regulation of cellular ca	0.01728 ( 39 of 2257 genes )	0.01164 ( 396 of 34011 annotated genes )	0.0009744	1	Psmd14, Dab2, Tnfrsf1b, Sh3d19, Tbc1d8, Psen1, Ccr7, Arhgap6, Tbc1d2b, Cnr1, Srgap2, Sumo3, Ndel1, Cnn3, Hif1a, Ccl24, Dock4, Tnf, Commd1, Adam9, Psmd10, Pip5k1a, Rnf180, Dab2ip, Iigp1, Apoe, Acsl5, Adam8, Pafah1b2, Mif, Tbc1d5, Ldlr, Pkp4, Ier3, Il1b, Scoc, Larp1, Pgam1, Map2k1,
GO:0080135	regulation of cellular re	0.01152 ( 26 of 2257 genes )	0.00679 ( 231 of 34011 annotated genes )	0.001001	1	Nfe2l2, Pnp, Dab2ip, Rnf8, Hmgcr, Ccr7, Cd44, Pafah1b2, Spred2, Mif, Il1a, Stk3, Eef1e1, Ndel1, Ltbr, Ripk2, Scarf1, Il1b, Tnf, Scoc, Fech, Larp1, Ube2n, Edn1, Map2k1, Psmd10,
GO:0006695	cholesterol biosynthetic	0.00354 ( 8 of 2257 genes )	0.00109 ( 37 of 34011 annotated genes )	0.001089	1	Insig2, Fdft1, Cyp51, Hsd17b7, Apoe, Hmgcr, Lss, Ebp,
GO:0009152	purine ribonucleotide bio	0.00532 ( 12 of 2257 genes )	0.00218 ( 74 of 34011 annotated genes )	0.001098	1	Ak2, Pnp, Guk1, Nme5, Aldoa, Pkm2, Atp5o, Atic, Nme4, Atp5f1, Gmps, Atp5b,
GO:0021795	cerebral cortex cell migr	0.00310 ( 7 of 2257 genes )	0.00085 ( 29 of 34011 annotated genes )	0.001115	1	Robo1, Pou3f2, Srgap2, Ndel1, Cx3cr1, Lrp8, Psen1,
GO:0032768	regulation of monooxygena	0.00310 ( 7 of 2257 genes )	0.00085 ( 29 of 34011 annotated genes )	0.001115	1	Il1b, Cnr1, Tnf, Gch1, Acvr2a, Apoe, Nfkb1,
GO:0050870	positive regulation of T	0.00709 ( 16 of 2257 genes )	0.00341 ( 116 of 34011 annotated genes )	0.001116	1	Cd59b, Cd86, Pnp, Nck1, Ap3b1, Pdcd1lg2, Cd47, Lgals1, Ripk2, Il1b, Gimap5, Ccr7, Hsp90aa1, Adam8, Dnaja3, Il2rg,
GO:0048523	negative regulation of ce	0.08374 ( 189 of 2257 genes )	0.07706 ( 2621 of 34011 annotated genes )	0.001129	1	Mapkapk2, Sbno2, Ywhah, Mir133b, Ccr7, Xcl1, Arhgap6, Chst11, Rest, Gpi1, Parl, Lamb1, Lgals1, Gsn, Dact2, Tspo, Nfkb1, Nupr1, Ptpn11, Dab2ip, Foxn3, Hmgcr, Nlrc5, Stat1, Plek, Adam8, Tnip3, Il1a, Rbpj, Rgs6, Cish, Nr1i2, Gnai2, Pea15a, Pebp1, Dpysl3, Snx6, Rap2c, Leprel1, Cx3cl1, Pla2g16, Hivep1, Edn1, Cxcr7, Bnip3, Smurf1, Ppp2r5a, Ccl4, Dusp6, Txn1, Kdr, Thbs1, Cnr1, Obfc2a, Hif1a, Tox3, Psmc5…
GO:0010627	regulation of intracellul	0.02127 ( 48 of 2257 genes )	0.01529 ( 520 of 34011 annotated genes )	0.001131	1	Prl, Ccr7, Cd44, Cyr61, Osm, Dusp6, Kdr, Thbs1, Stk3, Cnksr3, A430084P05Rik, S100a13, Lgals1, Clec4n, Chi3l1, Ripk2, Trim38, Zdhhc17, Tnf, Ube2n, Psmd10, Pdgfa, Dab2ip, Pdcd11, Fkbp1a, Hmgcr, Ccr1, Stat1, Rhoa, Adam8, Mif, Tnip3, Il1a, Pigu, Gja1, Eef1d, Ltbr, Tgm2, Litaf, Il1b, Xdh, Cenpj, Pebp1, Dnaja3, Kit, Edn1, Map2k1, Prkca,
GO:0031620	regulation of fever gener	0.00177 ( 4 of 2257 genes )	0.00026 ( 9 of 34011 annotated genes )	0.001132	1	Ccr1, Il1b, Cnr1, Tnf,
GO:0042987	amyloid precursor protein	0.00177 ( 4 of 2257 genes )	0.00026 ( 9 of 34011 annotated genes )	0.001132	1	Pion, Tmed10, Fkbp1a, Psen1,
GO:0048661	positive regulation of sm	0.00443 ( 10 of 2257 genes )	0.00162 ( 55 of 34011 annotated genes )	0.001139	1	Nampt, Hif1a, Tgm2, Hmgcr, Stat1, Tnf, Ager, Cx3cl1, Edn1, Prkca,
GO:0043086	negative regulation of ca	0.02304 ( 52 of 2257 genes )	0.01691 ( 575 of 34011 annotated genes )	0.001141	1	Farp1, Psen1, Ppp2r5a, Tmem225, Txnip, Cd44, Cflar, Rrp1b, Gzma, Dusp6, Gpi1, Thbs1, Cnr1, Stfa3, Dusp19, Cst7, Cstb, Serpinb9, Cnn3, Gnai3, Ifit1, Tnf, Serpinb2, Nfkb1, Dnajc3, Dab2ip, Mki67ip, Serpina3n, Apoe, Serpinb8, Serpinh1, Fkbp1a, Hmgcr, Ppp1r14b, Prol1, Ppp1r11, Plek, Serpinb3a, Bcl2l1, Spred2, Serpinb11, Itih3, Wfdc6b, Csnk2a1, Prpsap1, Il1b, Gnai2, Pebp1, Calu, Dnaja3, Prkca, Serpinb3…
GO:0046034	ATP metabolic process	0.00842 ( 19 of 2257 genes )	0.00441 ( 150 of 34011 annotated genes )	0.001158	1	Abcc5, Tap1, Abcb1b, Atp6v0c, Hsp90aa1, Myh9, Entpd1, Atp5b, Ak2, Guk1, Rnf213, Aldoa, Pkm2, Atp5o, Atp5f1, Atp1b3, Rfc3, Ak4, Psmc5,
GO:0051050	positive regulation of tr	0.01994 ( 45 of 2257 genes )	0.01411 ( 480 of 34011 annotated genes )	0.001164	1	Clec7a, Tlr2, Psg22, Ccl4, Xcl1, Ccr7, Acvr2a, Hsp90aa1, Niacr1, Casp1, Cd38, Cnksr3, Clec4n, Ppt1, Tnf, Bcr, Tspo, Adam9, Dpysl2, Sgip1, Ptpn11, Clec5a, Fcgr3, Cd47, Clec4e, Apoe, Tmem30a, Ccr1, Abca1, Gimap5, Acsl5, P2ry2, Tmem173, Crh, Pycard, Pld2, Mif, Fcgr2b, Il1a, P2rx1, Il1b, Cxcl1, Cd14, Edn1, Prkca,
GO:0045766	positive regulation of an	0.00620 ( 14 of 2257 genes )	0.00279 ( 95 of 34011 annotated genes )	0.001165	1	Kdr, Thbs1, Il1a, Erap1, Cd34, Psg22, Chi3l1, Il1b, Ccl24, Cx3cr1, Cx3cl1, Adm, Cysltr1, Prkca,
GO:0070201	regulation of establishme	0.01329 ( 30 of 2257 genes )	0.00835 ( 284 of 34011 annotated genes )	0.001211	1	Ptpn11, Tlr2, Dab2ip, Clec5a, Clec4e, Ywhab, Psg22, Tmem30a, Ppp2r5a, Fzd1, Rangap1, Ccr7, Hsp90aa1, Tmem173, Bcl2l1, Pycard, Mif, Txn1, Il1a, Casp1, Rab8a, Clec4n, Litaf, Il1b, Tnf, Adam9, Cx3cl1, Cd14, Exoc4, Psmd10,
GO:0006949	syncytium formation	0.00266 ( 6 of 2257 genes )	0.00065 ( 22 of 34011 annotated genes )	0.001273	1	Nphs1, Cd44, Casp1, Myh9, Adam8, Adam9,
GO:0006953	acute-phase response	0.00354 ( 8 of 2257 genes )	0.00112 ( 38 of 34011 annotated genes )	0.00131	1	Reg3g, Cnr1, Il1a, Saa3, Stat3, Il1b, Ccr1, Tnf,
GO:0009261	ribonucleotide catabolic	0.01905 ( 43 of 2257 genes )	0.01341 ( 456 of 34011 annotated genes )	0.001319	1	Rhot1, Tuba8, Tbc1d8, Nudt9, Ccr7, Arhgap6, Atp6v0c, Gnb4, Hsp90aa1, Atp5b, Tbc1d2b, Srgap2, Ndel1, Atp5o, Gnai3, Ccl24, Dock4, Atp5f1, Rragc, Rfc3, Psmc5, Gch1, Abcc5, Pip5k1a, Dab2ip, Rhoj, Mras, Iigp1, Tap1, Abcb1b, Rhoa, Tbcc, Myh9, Entpd1, Tbc1d5, Entpd7, Srpr, Rnf213, Pkp4, Gnai2, Tubb5, Rap2c, Map2k1,
GO:0016072	rRNA metabolic process	0.00665 ( 15 of 2257 genes )	0.00315 ( 107 of 34011 annotated genes )	0.001332	1	Dkc1, Pin4, 0610007P22Rik, Wdr12, Nop10, Mphosph6, Rpl5, Pdcd11, Pa2g4, Ddx56, Dimt1, Rrp1b, Pop4, Tbl3, Fbl,
GO:0034404	nucleobase, nucleoside an	0.01329 ( 30 of 2257 genes )	0.00841 ( 286 of 34011 annotated genes )	0.001353	1	Ctps, Pnp, Nme5, Nampt, Nppa, Apoe, Atic, Nme4, Abca1, Crh, Atp5b, Mthfd1, Ak2, Guk1, Kynu, Aldoa, Pkm2, Atp5o, Gnai3, Prpsap1, Gnai2, Atp5f1, Calca, Rrm1, Vip, Qtrtd1, Oas1a, Adm, Gmps, Edn1,
GO:0034654	nucleobase, nucleoside, n	0.01329 ( 30 of 2257 genes )	0.00841 ( 286 of 34011 annotated genes )	0.001353	1	Ctps, Pnp, Nme5, Nampt, Nppa, Apoe, Atic, Nme4, Abca1, Crh, Atp5b, Mthfd1, Ak2, Guk1, Kynu, Aldoa, Pkm2, Atp5o, Gnai3, Prpsap1, Gnai2, Atp5f1, Calca, Rrm1, Vip, Qtrtd1, Oas1a, Adm, Gmps, Edn1,
GO:0022409	positive regulation of ce	0.00310 ( 7 of 2257 genes )	0.00088 ( 30 of 34011 annotated genes )	0.001382	1	Il1b, Tnf, Cd44, Cd47, Cx3cl1, Ppap2b, Lgals1,
GO:0032268	regulation of cellular pr	0.03855 ( 87 of 2257 genes )	0.03178 ( 1081 of 34011 annotated genes )	0.0014	1	Kdm3a, Nck1, Dab2, Tnfrsf1b, Igf2bp2, Psen1, Ccr7, Cd44, Cyr61, Eif4e, Osm, Stk3, Dusp19, Ttn, Chi3l1, Ripk2, Dgkh, Ndufs4, Ppp2r5d, Tnf, Mapksp1, Agk, Eif3k, Adam9, Psmd10, Dnajc3, Nupr1, Ptpn11, Rnf180, Dab2ip, Apoe, Hmgcr, Adam8, Rps6ka4, Ppp1r15b, Cish, Gnai2, Aimp2, Pebp1, Fech, Rap2c, Dnaja3, Ppap2b, Prkca, Edn1, Psmd14, Eif2s1, Sh3d19, Prlr, Smurf1, Ppp2r5a, Acvr2a, Tnik, Dusp6, Thbs1, Sum…
GO:0034655	nucleobase, nucleoside, n	0.02127 ( 48 of 2257 genes )	0.01547 ( 526 of 34011 annotated genes )	0.001435	1	Rhot1, Tuba8, Tbc1d8, Nudt9, Ccr7, Arhgap6, Atp6v0c, Gnb4, Hsp90aa1, Atp5b, Tbc1d2b, Srgap2, Ndel1, Cnn3, Atp5o, Gnai3, Ccl24, Dock4, Atp5f1, Rragc, Rfc3, Dpysl2, Psmc5, Pip5k1a, Gch1, Abcc5, Pnp, Dab2ip, Rhoj, Mras, Tap1, Iigp1, Abcb1b, Rhoa, Tbcc, Myh9, Entpd1, Tbc1d5, Entpd7, Srpr, Rnf213, Pkp4, Xdh, Gnai2, Tubb5, Dpysl3, Rap2c, Map2k1,
GO:0034656	nucleobase, nucleoside an	0.02127 ( 48 of 2257 genes )	0.01547 ( 526 of 34011 annotated genes )	0.001435	1	Rhot1, Tuba8, Tbc1d8, Nudt9, Ccr7, Arhgap6, Atp6v0c, Gnb4, Hsp90aa1, Atp5b, Tbc1d2b, Srgap2, Ndel1, Cnn3, Atp5o, Gnai3, Ccl24, Dock4, Atp5f1, Rragc, Rfc3, Dpysl2, Psmc5, Pip5k1a, Gch1, Abcc5, Pnp, Dab2ip, Rhoj, Mras, Tap1, Iigp1, Abcb1b, Rhoa, Tbcc, Myh9, Entpd1, Tbc1d5, Entpd7, Srpr, Rnf213, Pkp4, Xdh, Gnai2, Tubb5, Dpysl3, Rap2c, Map2k1,
GO:0006461	protein complex assembly	0.02791 ( 63 of 2257 genes )	0.02164 ( 736 of 34011 annotated genes )	0.001467	1	Tmsb10, Pcbd2, Nck1, Tuba8, Nudt21, Vwf, Prlr, Lamc1, Pomp, Hsp90aa1, Aldh1a7, Vdac2, Ehd1, Prex1, Gphn, Epb4.9, Ttn, Senp6, Dgkh, Ndufs4, Gsn, Ccl24, Tnf, Aldh1a1, Prkab1, Psmd10, Birc2, Psmg1, Gch1, Nupr1, Mtap1b, Tnfaip1, Ywhab, Ssna1, Fkbp1a, Hmgcr, Kcnb1, Add2, Rhoa, Smad1, Vamp8, Plek, Mif, Diap1, Gja1, Tmed10, Xaf1, P2rx1, Fgg, Tgm2, Apaf1, Nphs1, Gria2, Snap23, Rrm1, Cenpj, Tubb5, Dpysl3,…
GO:0051223	regulation of protein tra	0.01241 ( 28 of 2257 genes )	0.00773 ( 263 of 34011 annotated genes )	0.001538	1	Ptpn11, Tlr2, Dab2ip, Clec5a, Clec4e, Ywhab, Psg22, Tmem30a, Fzd1, Rangap1, Ccr7, Hsp90aa1, Tmem173, Pycard, Mif, Txn1, Il1a, Casp1, Rab8a, Clec4n, Litaf, Il1b, Tnf, Adam9, Cx3cl1, Cd14, Exoc4, Psmd10,
GO:0050793	regulation of development	0.04608 ( 104 of 2257 genes )	0.03931 ( 1337 of 34011 annotated genes )	0.001562	1	Nfe2l2, Scn1b, Med14, Dab2, Psen1, Ywhah, Mir133b, Ccr7, Cd44, Hsp90aa1, Cyr61, Rest, Cysltr1, Egln1, Tsc22d3, Lgals1, Chi3l1, Ripk2, Bglap, Ppp2r5d, Zmym4, Tnf, Pou3f2, Nphp3, Tspo, Adam9, Il2rg, Dpysl2, Nupr1, Wdr77, Lhx5, Dab2ip, Hmgcr, Ccr1, Stat1, Rhoa, Loxl2, Smad1, Adam8, P2ry2, Cx3cr1, Il1a, Erap1, Rbpj, Rgs6, Cd34, Dpysl3, Cx3cl1, Aspn, Prkca, Edn1, Bnip3, Sh3d19, Prlr, Psg22, Phb2, Vim,…
GO:0009165	nucleotide biosynthetic p	0.01285 ( 29 of 2257 genes )	0.00812 ( 276 of 34011 annotated genes )	0.001569	1	Ctps, Pnp, Nme5, Nampt, Nppa, Apoe, Atic, Nme4, Abca1, Crh, Atp5b, Mthfd1, Ak2, Guk1, Kynu, Aldoa, Pkm2, Atp5o, Gnai3, Prpsap1, Gnai2, Atp5f1, Calca, Rrm1, Vip, Oas1a, Adm, Gmps, Edn1,
GO:0048871	multicellular organismal	0.00842 ( 19 of 2257 genes )	0.00453 ( 154 of 34011 annotated genes )	0.001584	1	Ldb2, Csf1, Vps54, Vsig1, Ccr1, Gimap5, Adam8, Kdr, Cnr1, Il1a, Cd34, Cd38, Ctsk, Aipl1, Stat3, Il1b, Xdh, Tnf, Calca,
GO:0040012	regulation of locomotion	0.01772 ( 40 of 2257 genes )	0.01238 ( 421 of 34011 annotated genes )	0.001656	1	Tlr2, Xcl1, Ccr7, Cyr61, Ccl7, Thbs1, Kdr, Myo1f, Lamb1, Hif1a, Ccl24, Csnk2b, Amotl1, Bcr, Adam9, Csf1, Pdgfa, Apoe, Cmklr1, Ccr1, Rhoa, Adam8, Cx3cr1, P2ry2, Pld2, Mif, Plau, Diap1, Robo1, Ager, Dpysl3, Rap2c, Icam1, Kit, Cx3cl1, Ppap2b, Zfp640, Edn1, Map2k1, Prkca,
GO:0009203	ribonucleoside triphospha	0.01861 ( 42 of 2257 genes )	0.01317 ( 448 of 34011 annotated genes )	0.001663	1	Rhot1, Tuba8, Tbc1d8, Ccr7, Arhgap6, Atp6v0c, Gnb4, Hsp90aa1, Atp5b, Tbc1d2b, Srgap2, Ndel1, Atp5o, Gnai3, Ccl24, Dock4, Atp5f1, Rragc, Rfc3, Psmc5, Gch1, Abcc5, Pip5k1a, Dab2ip, Rhoj, Mras, Iigp1, Tap1, Abcb1b, Rhoa, Tbcc, Myh9, Entpd1, Tbc1d5, Entpd7, Srpr, Rnf213, Pkp4, Gnai2, Tubb5, Rap2c, Map2k1,
GO:0006944	cellular membrane fusion	0.00487 ( 11 of 2257 genes )	0.00200 ( 68 of 34011 annotated genes )	0.001781	1	Bnip3, Chchd3, Stx8, Rab8a, Gnai3, Stx6, Snap23, Afg3l2, Afg3l1, Vamp8, Adam8,
GO:0045862	positive regulation of pr	0.00487 ( 11 of 2257 genes )	0.00200 ( 68 of 34011 annotated genes )	0.001781	1	Rnf180, Dab2, Tnfrsf1b, Sh3d19, Apoe, Psen1, Il1b, Tnf, Adam8, Adam9, Psmd10,
GO:0032610	interleukin-1 alpha produ	0.00133 ( 3 of 2257 genes )	0.00015 ( 5 of 34011 annotated genes )	0.001794	1	Calca, Casp1, S100a13,
GO:0034116	positive regulation of he	0.00133 ( 3 of 2257 genes )	0.00015 ( 5 of 34011 annotated genes )	0.001794	1	Il1b, Tnf, Cd44,
GO:0042159	lipoprotein catabolic pro	0.00133 ( 3 of 2257 genes )	0.00015 ( 5 of 34011 annotated genes )	0.001794	1	Ppt1, Ldlr, Apoe,
GO:0046654	tetrahydrofolate biosynth	0.00133 ( 3 of 2257 genes )	0.00015 ( 5 of 34011 annotated genes )	0.001794	1	Mthfd1l, Gch1, Atic,
GO:0042254	ribosome biogenesis	0.00842 ( 19 of 2257 genes )	0.00459 ( 156 of 34011 annotated genes )	0.001842	1	Pin4, Rps2, 0610007P22Rik, Rpl5, Pdcd11, Pa2g4, Ddx56, Rrp1b, Fbl, Bysl, Dkc1, Rrs1, Wdr12, Nop10, Mphosph6, Brix1, Dimt1, Tbl3, Pop4,
GO:0019229	regulation of vasoconstri	0.00399 ( 9 of 2257 genes )	0.00144 ( 49 of 34011 annotated genes )	0.001847	1	P2rx1, Cd38, Hif1a, Icam1, Adm, Cx3cl1, Edn1, Map2k1, Cysltr1,
GO:0090305	nucleic acid phosphodiest	0.00399 ( 9 of 2257 genes )	0.00144 ( 49 of 34011 annotated genes )	0.001847	1	Ddx1, Dnase1l3, Bnip3, Nudt21, Mir196a-1, Ppt1, Apaf1, Cycs, Pop4,
GO:0006611	protein export from nucle	0.00354 ( 8 of 2257 genes )	0.00118 ( 40 of 34011 annotated genes )	0.001859	1	Txn1, Rangap1, Egr2, Ptpn11, Xpo7, Xpo5, Xpo6, Smurf1,
GO:0032612	interleukin-1 production	0.00354 ( 8 of 2257 genes )	0.00118 ( 40 of 34011 annotated genes )	0.001859	1	Casp1, S100a13, Il1b, Abca1, Ccr7, Calca, Mefv, Pycard,
GO:0009154	purine ribonucleotide cat	0.01861 ( 42 of 2257 genes )	0.01329 ( 452 of 34011 annotated genes )	0.001963	1	Rhot1, Tuba8, Tbc1d8, Nudt9, Ccr7, Arhgap6, Atp6v0c, Gnb4, Hsp90aa1, Atp5b, Tbc1d2b, Srgap2, Ndel1, Atp5o, Gnai3, Ccl24, Dock4, Atp5f1, Rragc, Rfc3, Psmc5, Gch1, Abcc5, Pip5k1a, Dab2ip, Rhoj, Mras, Iigp1, Tap1, Abcb1b, Rhoa, Tbcc, Myh9, Entpd1, Tbc1d5, Srpr, Rnf213, Pkp4, Gnai2, Tubb5, Rap2c, Map2k1,
GO:0072523	purine-containing compoun	0.01994 ( 45 of 2257 genes )	0.01450 ( 493 of 34011 annotated genes )	0.00197	1	Rhot1, Tuba8, Tbc1d8, Nudt9, Ccr7, Arhgap6, Atp6v0c, Gnb4, Hsp90aa1, Atp5b, Tbc1d2b, Srgap2, Ndel1, Cnn3, Atp5o, Gnai3, Ccl24, Dock4, Atp5f1, Rragc, Rfc3, Psmc5, Pip5k1a, Gch1, Abcc5, Pnp, Dab2ip, Rhoj, Mras, Iigp1, Tap1, Abcb1b, Rhoa, Tbcc, Myh9, Entpd1, Tbc1d5, Srpr, Rnf213, Pkp4, Xdh, Gnai2, Tubb5, Rap2c, Map2k1,
GO:2000026	regulation of multicellul	0.03943 ( 89 of 2257 genes )	0.03305 ( 1124 of 34011 annotated genes )	0.001993	1	Nfe2l2, Scn1b, Dab2, Psen1, Ywhah, Mir133b, Ccr7, Cd44, Hsp90aa1, Cyr61, Rest, Cysltr1, Egln1, Tsc22d3, Lgals1, Chi3l1, Ripk2, Bglap, Ppp2r5d, Tnf, Pou3f2, Tspo, Il2rg, Dpysl2, Nupr1, Wdr77, Lhx5, Dab2ip, Hmgcr, Ccr1, Stat1, Rhoa, Loxl2, Smad1, Adam8, P2ry2, Cx3cr1, Il1a, Erap1, Rbpj, Rgs6, Cd34, Dpysl3, Cx3cl1, Aspn, Prkca, Edn1, Prlr, Psg22, Phb2, Vim, Acvr2a, Tnik, Dusp6, Thbs1, Kdr, Cd86, Pre…
GO:0019220	regulation of phosphate m	0.03101 ( 70 of 2257 genes )	0.02490 ( 847 of 34011 annotated genes )	0.002045	1	Dab2, Farp1, Psen1, Tmem225, Ccr7, Cd44, Rrp1b, Cyr61, Osm, Stk3, Dusp19, Ttn, Chi3l1, Dgkh, Ndufs4, Ppp2r5d, Tnf, Mapksp1, Agk, Adam9, Psmd10, Dnajc3, Ptpn11, Dab2ip, Apoe, Hmgcr, Nlrc5, Plek, Adam8, Rps6ka4, Cish, Gnai2, Pebp1, Fech, Rap2c, Dnaja3, Ppap2b, Prkca, Edn1, Prlr, Ppp2r5a, Acvr2a, Tnik, Dusp6, Thbs1, Cnksr3, Akap13, Csnk2b, Calca, Tlr1, Csf1, Pdgfa, Mki67ip, Ywhab, Fkbp1a, Fzd1, Dusp…
GO:0071456	cellular response to hypo	0.00266 ( 6 of 2257 genes )	0.00071 ( 24 of 34011 annotated genes )	0.002079	1	Bnip3, Higd1a, Npepps, Adam8, Fam162a, Hif1a,
GO:0051270	regulation of cellular co	0.01728 ( 39 of 2257 genes )	0.01214 ( 413 of 34011 annotated genes )	0.002094	1	Tlr2, Xcl1, Ccr7, Cyr61, Ccl7, Thbs1, Kdr, Myo1f, Lamb1, Hif1a, Ccl24, Csnk2b, Amotl1, Bcr, Adam9, Csf1, Pdgfa, Apoe, Cmklr1, Ccr1, Rhoa, Cx3cr1, P2ry2, Adam8, Pld2, Mif, Plau, Diap1, Ager, Dpysl3, Rap2c, Icam1, Kit, Cx3cl1, Ppap2b, Zfp640, Edn1, Map2k1, Prkca,
GO:0051174	regulation of phosphorus	0.03101 ( 70 of 2257 genes )	0.02493 ( 848 of 34011 annotated genes )	0.002105	1	Dab2, Farp1, Psen1, Tmem225, Ccr7, Cd44, Rrp1b, Cyr61, Osm, Stk3, Dusp19, Ttn, Chi3l1, Dgkh, Ndufs4, Ppp2r5d, Tnf, Mapksp1, Agk, Adam9, Psmd10, Dnajc3, Ptpn11, Dab2ip, Apoe, Hmgcr, Nlrc5, Plek, Adam8, Rps6ka4, Cish, Gnai2, Pebp1, Fech, Rap2c, Dnaja3, Ppap2b, Prkca, Edn1, Prlr, Ppp2r5a, Acvr2a, Tnik, Dusp6, Thbs1, Cnksr3, Akap13, Csnk2b, Calca, Tlr1, Csf1, Pdgfa, Mki67ip, Ywhab, Fkbp1a, Fzd1, Dusp…
GO:0050867	positive regulation of ce	0.00975 ( 22 of 2257 genes )	0.00570 ( 194 of 34011 annotated genes )	0.002137	1	Pnp, Nck1, Ap3b1, Pdcd1lg2, Cd47, Gimap5, Ccr7, Plek, Lyst, Hsp90aa1, Adam8, Mif, Pld2, Cd59b, Thbs1, Cd86, Cd38, Lgals1, Ripk2, Il1b, Dnaja3, Il2rg,
GO:0048284	organelle fusion	0.00399 ( 9 of 2257 genes )	0.00147 ( 50 of 34011 annotated genes )	0.002138	1	Bnip3, Chchd3, Stx8, Rab8a, Gnai3, Stx6, Afg3l2, Afg3l1, Vamp8,
GO:0006897	endocytosis	0.01506 ( 34 of 2257 genes )	0.01020 ( 347 of 34011 annotated genes )	0.002153	1	Clec7a, Ptpn1, Dab2, Ccr7, Ap1g1, Ehd1, Atp5b, Thbs1, Ly75, Ppt1, Calca, Jmjd6, Grk4, Bcr, Ehd2, Sgip1, Scamp1, Fcgr3, Cd47, Ap3b1, Apoe, Abca1, Vamp8, Lrp8, Pld2, Fcgr2b, Ldlr, Cd209a, Tgm2, Gria2, Arr3, Adm, Cd14, Prkca,
GO:0010324	membrane invagination	0.01506 ( 34 of 2257 genes )	0.01020 ( 347 of 34011 annotated genes )	0.002153	1	Clec7a, Ptpn1, Dab2, Ccr7, Ap1g1, Ehd1, Atp5b, Thbs1, Ly75, Ppt1, Calca, Jmjd6, Grk4, Bcr, Ehd2, Sgip1, Scamp1, Fcgr3, Cd47, Ap3b1, Apoe, Abca1, Vamp8, Lrp8, Pld2, Fcgr2b, Ldlr, Cd209a, Tgm2, Gria2, Arr3, Adm, Cd14, Prkca,
GO:0010959	regulation of metal ion t	0.00930 ( 21 of 2257 genes )	0.00535 ( 182 of 34011 annotated genes )	0.002154	1	Homer1, Fkbp1a, Ccr1, Ywhah, Ccl4, Gimap5, Xcl1, Crh, Mif, Diap1, Gja1, Cnksr3, Trdn, P2rx1, Calca, Vip, Cxcl1, Plcb4, Kcne3, Tspo, Icam1,
GO:0005996	monosaccharide metabolic	0.01152 ( 26 of 2257 genes )	0.00717 ( 244 of 34011 annotated genes )	0.002189	1	Hibadh, G6pd2, Hk2, Galk2, Pygl, Csgalnact1, Dusp12, Glb1, Ldha, Mif, Gpi1, Pdk1, Guk1, Pfkfb3, Aldoa, Dpagt1, Hif1a, Pkm2, Ier3, Man2c1, Tnf, Bpgm, Pgk1, Pgam1, Pgm2, Aldoc,
GO:0002437	inflammatory response to	0.00354 ( 8 of 2257 genes )	0.00121 ( 41 of 34011 annotated genes )	0.002193	1	Cnr1, Tnf, Fcgr2b, Ccr7, Rbpj, Fcgr3, Serpinb9, Psmb4,
GO:0045428	regulation of nitric oxid	0.00354 ( 8 of 2257 genes )	0.00121 ( 41 of 34011 annotated genes )	0.002193	1	Tlr2, Cd34, Il1b, Tnf, Gimap5, Hsp90aa1, Tspo, Icam1,
GO:0042325	regulation of phosphoryla	0.02836 ( 64 of 2257 genes )	0.02243 ( 763 of 34011 annotated genes )	0.002195	1	Dab2, Prlr, Psen1, Ppp2r5a, Ccr7, Cd44, Acvr2a, Tnik, Cyr61, Osm, Dusp6, Thbs1, Stk3, Dusp19, Ttn, Cnksr3, Akap13, Chi3l1, Dgkh, Ndufs4, Ppp2r5d, Csnk2b, Tnf, Calca, Mapksp1, Agk, Adam9, Tlr1, Psmd10, Dnajc3, Csf1, Pdgfa, Ptpn11, Dab2ip, Apoe, Fkbp1a, Hmgcr, Nlrc5, Ppp1r14b, Dusp12, Fzd1, Adam8, Lrp8, Spred2, Crh, Rps6ka4, Mif, Cish, Xdh, Prpsap1, Il1b, Gnai2, Pebp1, Arr3, Fech, Rap2c, Ccnh, Rbl1…
GO:0031649	heat generation	0.00222 ( 5 of 2257 genes )	0.00050 ( 17 of 34011 annotated genes )	0.002267	1	Ccr1, Il1b, Cnr1, Tnf, Il1a,
GO:0042982	amyloid precursor protein	0.00222 ( 5 of 2257 genes )	0.00050 ( 17 of 34011 annotated genes )	0.002267	1	Pion, Bace2, Tmed10, Fkbp1a, Psen1,
GO:0050995	negative regulation of li	0.00222 ( 5 of 2257 genes )	0.00050 ( 17 of 34011 annotated genes )	0.002267	1	Il1b, Cnr1, Gimap5, Tnf, Niacr1,
GO:0016197	endosome transport	0.00576 ( 13 of 2257 genes )	0.00268 ( 91 of 34011 annotated genes )	0.002289	1	Snx4, Vps54, Stx8, Snx1, Slc30a6, Abca1, Stx6, Chmp5, Snx6, Lyst, Mtm1, Ehd2, Ehd1,
GO:0009143	nucleoside triphosphate c	0.01861 ( 42 of 2257 genes )	0.01341 ( 456 of 34011 annotated genes )	0.002309	1	Rhot1, Tuba8, Tbc1d8, Ccr7, Arhgap6, Atp6v0c, Gnb4, Hsp90aa1, Atp5b, Tbc1d2b, Srgap2, Ndel1, Atp5o, Gnai3, Ccl24, Dock4, Atp5f1, Rragc, Rfc3, Psmc5, Gch1, Abcc5, Pip5k1a, Dab2ip, Rhoj, Mras, Iigp1, Tap1, Abcb1b, Rhoa, Tbcc, Myh9, Entpd1, Tbc1d5, Entpd7, Srpr, Rnf213, Pkp4, Gnai2, Tubb5, Rap2c, Map2k1,
GO:0051130	positive regulation of ce	0.01994 ( 45 of 2257 genes )	0.01464 ( 498 of 34011 annotated genes )	0.00239	1	Clec7a, Scn1b, Bnip3, Nck1, Ranbp1, Ccr7, Hsp90aa1, Kdr, Cnr1, Ndel1, Ppt1, Ccl24, Ppp2r5d, Tnf, Bcr, Ube2n, Adam9, Sgip1, Mtap1b, Fcgr3, Cd47, Caprin1, Rhoa, Plek, P2ry2, Fam162a, Tnfsf10, Lrp8, Tgfb1i1, Pld2, Rps6ka4, Mif, Fcgr2b, Il1a, Myo3a, Il1b, Nphs1, Scarf1, Pebp1, Robo1, Dpysl3, Kit, Cd14, Edn1, Prkca,
GO:0001935	endothelial cell prolifer	0.00532 ( 12 of 2257 genes )	0.00238 ( 81 of 34011 annotated genes )	0.002437	1	Kdr, Thbs1, Cd34, Apoe, Xdh, Ccl24, Stat1, Calca, Aimp1, Vip, Loxl2, Prkca,
GO:0051047	positive regulation of se	0.01063 ( 24 of 2257 genes )	0.00650 ( 221 of 34011 annotated genes )	0.00247	1	Ptpn11, Tlr2, Clec5a, Clec4e, Psg22, Ccr7, Acvr2a, P2ry2, Pycard, Crh, Mif, Pld2, Il1a, Niacr1, Cd38, Casp1, Clec4n, Il1b, Tnf, Adam9, Cd14, Dpysl2, Edn1, Prkca,
GO:0001659	temperature homeostasis	0.00310 ( 7 of 2257 genes )	0.00097 ( 33 of 34011 annotated genes )	0.00249	1	Ccr1, Il1b, Cnr1, Gimap5, Tnf, Il1a, Stat3,
GO:0060548	negative regulation of ce	0.02481 ( 56 of 2257 genes )	0.01920 ( 653 of 34011 annotated genes )	0.002494	1	Cxcr7, Bnip3, Higd1a, Nme5, Casp4, Psen1, Ywhah, Ccr7, Cd44, Cflar, Fn1, Chst11, C5ar1, Cyr61, Gpi1, Kdr, Thbs1, Cd38, Tex11, Serpinb9, Tsc22d3, Hif1a, Ppt1, Tmx1, Tnf, Psmd10, Tox3, Nfkb1, Birc2, Rnf7, Pnp, Clec5a, Apoe, Hmgcr, Gimap5, Rhoa, Adam8, Cx3cr1, Bcl2l1, Crh, Mif, Cd59b, Cd34, Il2rb, Tmbim6, Aipl1, Il1b, Api5, Pea15a, Vip, Dnaja3, Kit, Cx3cl1, Adm, Prkca, Edn1,
GO:0045089	positive regulation of in	0.00576 ( 13 of 2257 genes )	0.00271 ( 92 of 34011 annotated genes )	0.002526	1	Tnip3, Clec7a, Cd86, Pvr, Tlr2, Mapkapk2, Trim30a, Ripk2, Gimap5, Xcl1, Adam8, Tmem173, Pycard,
GO:0006397	mRNA processing	0.01374 ( 31 of 2257 genes )	0.00914 ( 311 of 34011 annotated genes )	0.002533	1	Prpf6, Nudt21, Mir196a-1, Srsf3, Pdcd11, Ptbp1, Rbm17, Sf3a1, Ddx39, Lsm3, Tsen2, Esrp2, Gemin7, Ddx1, Eftud2, Magohb, Hnrnpc, Snrpe, Prpf31, Lsm10, Syf2, Ftsjd2, Prpf38a, Cwc15, Jmjd6, Prpf4, Ncbp2, Snrpa1, Hnrnpa3, Lsm5, Pop4,
GO:0019318	hexose metabolic process	0.01019 ( 23 of 2257 genes )	0.00615 ( 209 of 34011 annotated genes )	0.002535	1	Hibadh, G6pd2, Hk2, Galk2, Dusp12, Glb1, Ldha, Mif, Gpi1, Pdk1, Guk1, Pfkfb3, Aldoa, Hif1a, Pkm2, Ier3, Man2c1, Tnf, Bpgm, Pgk1, Pgam1, Pgm2, Aldoc,
GO:0043623	cellular protein complex	0.01329 ( 30 of 2257 genes )	0.00876 ( 298 of 34011 annotated genes )	0.002537	1	Psmg1, Tmsb10, Mtap1b, Nck1, Tuba8, Prlr, Ssna1, Fkbp1a, Add2, Rhoa, Pomp, Smad1, Hsp90aa1, Vdac2, Prex1, Diap1, Epb4.9, Ttn, Senp6, Fgg, Ccl24, Gsn, Nphs1, Ndufs4, Cenpj, Tubb5, Rnf4, Dnaja3, Clint1, Psmd10,
GO:0021885	forebrain cell migration	0.00354 ( 8 of 2257 genes )	0.00123 ( 42 of 34011 annotated genes )	0.002573	1	Robo1, Pou3f2, Srgap2, Ndel1, Cx3cr1, Emx2, Lrp8, Psen1,
GO:0043069	negative regulation of pr	0.02393 ( 54 of 2257 genes )	0.01841 ( 626 of 34011 annotated genes )	0.002603	1	Cxcr7, Bnip3, Higd1a, Nme5, Casp4, Psen1, Ywhah, Ccr7, Cd44, Cflar, Fn1, Chst11, C5ar1, Cyr61, Gpi1, Thbs1, Kdr, Cd38, Tex11, Serpinb9, Tsc22d3, Hif1a, Ppt1, Tmx1, Tnf, Psmd10, Tox3, Nfkb1, Birc2, Rnf7, Pnp, Clec5a, Apoe, Hmgcr, Gimap5, Rhoa, Adam8, Cx3cr1, Bcl2l1, Mif, Cd59b, Il2rb, Tmbim6, Aipl1, Il1b, Api5, Pea15a, Vip, Dnaja3, Kit, Cx3cl1, Adm, Edn1, Prkca,
GO:0002696	positive regulation of le	0.00930 ( 21 of 2257 genes )	0.00544 ( 185 of 34011 annotated genes )	0.002628	1	Pnp, Nck1, Ap3b1, Pdcd1lg2, Cd47, Gimap5, Ccr7, Lyst, Hsp90aa1, Adam8, Mif, Pld2, Cd59b, Thbs1, Cd86, Cd38, Lgals1, Ripk2, Il1b, Dnaja3, Il2rg,
GO:0006917	induction of apoptosis	0.01329 ( 30 of 2257 genes )	0.00879 ( 299 of 34011 annotated genes )	0.002667	1	Rnf7, Nupr1, Pnp, Ndufs3, Bnip3, Fcgr3, Casp4, Ctnnbl1, Tap1, Apoe, Gimap5, Stat1, Xcl1, Lyst, Tm2d1, Pycard, Crh, Sp110, Senp1, Thbs1, Pvr, Casp1, Serpinb9, Tgm2, C9, Apaf1, Tnf, Ppp3cb, Plagl2, Prkca,
GO:0002031	G-protein coupled recepto	0.00177 ( 4 of 2257 genes )	0.00032 ( 11 of 34011 annotated genes )	0.002699	1	Calca, Grk4, Adm, Pld2,
GO:0009396	folic acid-containing com	0.00177 ( 4 of 2257 genes )	0.00032 ( 11 of 34011 annotated genes )	0.002699	1	Mthfd1, Mthfd1l, Gch1, Atic,
GO:0031650	regulation of heat genera	0.00177 ( 4 of 2257 genes )	0.00032 ( 11 of 34011 annotated genes )	0.002699	1	Ccr1, Il1b, Cnr1, Tnf,
GO:0032695	negative regulation of in	0.00177 ( 4 of 2257 genes )	0.00032 ( 11 of 34011 annotated genes )	0.002699	1	Thbs1, Tlr2, Mefv, Cmklr1,
GO:0042535	positive regulation of tu	0.00177 ( 4 of 2257 genes )	0.00032 ( 11 of 34011 annotated genes )	0.002699	1	Thbs1, Tlr2, Fcgr3, Tlr1,
GO:0050435	beta-amyloid metabolic pr	0.00177 ( 4 of 2257 genes )	0.00032 ( 11 of 34011 annotated genes )	0.002699	1	Pion, Tmed10, Fkbp1a, Psen1,
GO:0070372	regulation of ERK1 and ER	0.00665 ( 15 of 2257 genes )	0.00338 ( 115 of 34011 annotated genes )	0.002747	1	Kdr, Pdgfa, Il1a, Cnksr3, A430084P05Rik, Hmgcr, Chi3l1, Ccr1, Ripk2, Il1b, Cd44, Cyr61, Prkca, Dusp6, Mif,
GO:0009207	purine ribonucleoside tri	0.01817 ( 41 of 2257 genes )	0.01314 ( 447 of 34011 annotated genes )	0.002781	1	Rhot1, Tuba8, Tbc1d8, Ccr7, Arhgap6, Atp6v0c, Gnb4, Hsp90aa1, Atp5b, Tbc1d2b, Srgap2, Ndel1, Atp5o, Gnai3, Ccl24, Dock4, Atp5f1, Rragc, Rfc3, Psmc5, Gch1, Abcc5, Pip5k1a, Dab2ip, Rhoj, Mras, Iigp1, Tap1, Abcb1b, Rhoa, Tbcc, Myh9, Entpd1, Tbc1d5, Srpr, Rnf213, Pkp4, Gnai2, Tubb5, Rap2c, Map2k1,
GO:0043549	regulation of kinase acti	0.02038 ( 46 of 2257 genes )	0.01517 ( 516 of 34011 annotated genes )	0.002795	1	Prlr, Psen1, Ppp2r5a, Ccr7, Tnik, Cyr61, Dusp6, Thbs1, Stk3, Dusp19, Ttn, Akap13, Chi3l1, Dgkh, Tnf, Calca, Mapksp1, Agk, Adam9, Tlr1, Psmd10, Dnajc3, Csf1, Pdgfa, Ptpn11, Dab2ip, Apoe, Hmgcr, Nlrc5, Dusp12, Adam8, Lrp8, Spred2, Mif, Cish, Il1b, Prpsap1, Gnai2, Rbl1, Ccnh, Rap2c, Kit, Dnaja3, Edn1, Map2k1, Prkca,
GO:0012502	induction of programmed c	0.01329 ( 30 of 2257 genes )	0.00882 ( 300 of 34011 annotated genes )	0.002803	1	Rnf7, Nupr1, Pnp, Ndufs3, Bnip3, Fcgr3, Casp4, Ctnnbl1, Tap1, Apoe, Gimap5, Stat1, Xcl1, Lyst, Tm2d1, Pycard, Crh, Sp110, Senp1, Thbs1, Pvr, Casp1, Serpinb9, Tgm2, C9, Apaf1, Tnf, Ppp3cb, Plagl2, Prkca,
GO:0042311	vasodilation	0.00399 ( 9 of 2257 genes )	0.00153 ( 52 of 34011 annotated genes )	0.002829	1	Kdr, Gch1, Apoe, Hmgcr, Calca, Vip, P2ry2, Adm, Plod3,
GO:0032502	developmental process	0.12007 ( 271 of 2257 genes )	0.11705 ( 3981 of 34011 annotated genes )	0.002841	1	Nfe2l2, Anpep, Mapkapk2, 4930447C04Rik, Asz1, Mir133b, Hsp90aa1, Rest, Gpi1, Ttn, Mtl5, Gsn, Zmym4, Aldh1a1, Jmjd6, Dact2, Tspo, Nupr1, Ptpn11, Lhx5, Dab2ip, Foxn3, Hmgcr, P2ry2, Il1a, Rbpj, Rgs6, Myo3a, Rab8a, Pkm2, Nphs1, Adam24, Dpysl3, Ccl12, Cxcr7, Bnip3, Psg22, Smurf1, Ctsl, Acvr2a, Tnik, Hspg2, Dusp6, Cnr1, Srgap2, Ndel1, Exoc4, Ddx4, Insig2, Pnp, Nmt1, Sox21, Spata19, Caprin1, Ctnnbl1, Ly…
GO:0008202	steroid metabolic process	0.01108 ( 25 of 2257 genes )	0.00694 ( 236 of 34011 annotated genes )	0.002844	1	Insig2, Ch25h, Nr5a2, Cyp51, Lmf1, Apoe, Hmgcr, Ywhah, Abca1, Hdlbp, Sc4mol, Crh, Rest, Lss, Ebp, Cyp2c65, Cyp27a1, Il1a, Ldlr, Tnf, Fdft1, Fech, Hsd17b7, Tspo, Adm,
GO:0044092	negative regulation of mo	0.02658 ( 60 of 2257 genes )	0.02102 ( 715 of 34011 annotated genes )	0.002925	1	Dab2, Farp1, Psen1, Ppp2r5a, Tmem225, Xcl1, Txnip, Cd44, Cflar, Rrp1b, Gzma, Egln1, Dusp6, Gpi1, Thbs1, Cnr1, Cst7, Dusp19, Stfa3, Cstb, Serpinb9, Cnn3, Gnai3, Ifit1, Tnf, Serpinb2, Commd1, Psmd10, Nfkb1, Dnajc3, Mki67ip, Dab2ip, Serpina3n, Serpinb8, Apoe, Serpinh1, Fkbp1a, Hmgcr, Cmklr1, Nlrc5, Ppp1r14b, Prol1, Ppp1r11, Plek, Serpinb3a, Bcl2l1, Spred2, Serpinb11, Itih3, Wfdc6b, Csnk2a1, Prpsap1,…
GO:0000737	DNA catabolic process, en	0.00222 ( 5 of 2257 genes )	0.00053 ( 18 of 34011 annotated genes )	0.00299	1	Ppt1, Apaf1, Dnase1l3, Bnip3, Cycs,
GO:0006309	DNA fragmentation involve	0.00222 ( 5 of 2257 genes )	0.00053 ( 18 of 34011 annotated genes )	0.00299	1	Ppt1, Apaf1, Dnase1l3, Bnip3, Cycs,
GO:0043124	negative regulation of I-	0.00222 ( 5 of 2257 genes )	0.00053 ( 18 of 34011 annotated genes )	0.00299	1	Tnip3, Stat1, Rhoa, Dab2ip, Dnaja3,
GO:0001819	positive regulation of cy	0.00886 ( 20 of 2257 genes )	0.00515 ( 175 of 34011 annotated genes )	0.003028	1	Clec7a, Tlr2, Ccl4, Gimap5, Xcl1, Ccr7, Adam8, P2ry2, Pycard, Mif, Il1a, Cd34, Casp1, Hif1a, Il1b, Ripk2, Tnf, Calca, Cx3cl1, Cd14,
GO:0043269	regulation of ion transpo	0.01418 ( 32 of 2257 genes )	0.00964 ( 328 of 34011 annotated genes )	0.003046	1	Scn1b, Ywhah, Gpr89, Ccl4, Xcl1, Vdac2, Cnr1, Cybb, Cnksr3, Tnf, Calca, Plcb4, Kcne3, Tspo, Homer1, Fkbp1a, Kcnb1, Ccr1, Gimap5, Kcnj2, Crh, Mif, Scn2a1, Diap1, Clic3, Gja1, Trdn, P2rx1, Cxcl1, Vip, Vdac3, Icam1,
GO:0034504	protein localization to n	0.01063 ( 24 of 2257 genes )	0.00662 ( 225 of 34011 annotated genes )	0.003119	1	Snupn, Prl, Tlr2, Dab2ip, Ipo7, Sec61b, Tnpo3, Fzd1, Ipo13, l7Rn6, Txnip, Hsp90aa1, Tmem173, Txn1, Kpnb1, Sumo3, Kpna3, Stat3, Litaf, Il1b, Tnf, Kpna2, Kpna6, Psmd10,
GO:0043112	receptor metabolic proces	0.00709 ( 16 of 2257 genes )	0.00376 ( 128 of 34011 annotated genes )	0.003126	1	Ssna1, Apoe, Psen1, Smurf1, Chmp5, Pld2, Hif1a, Tnf, Gria2, Calca, Ankrd13c, Ace2, Dnaja3, Grk4, Adm, Edn1,
GO:0009146	purine nucleoside triphos	0.01817 ( 41 of 2257 genes )	0.01323 ( 450 of 34011 annotated genes )	0.003131	1	Rhot1, Tuba8, Tbc1d8, Ccr7, Arhgap6, Atp6v0c, Gnb4, Hsp90aa1, Atp5b, Tbc1d2b, Srgap2, Ndel1, Atp5o, Gnai3, Ccl24, Dock4, Atp5f1, Rragc, Rfc3, Psmc5, Gch1, Abcc5, Pip5k1a, Dab2ip, Rhoj, Mras, Iigp1, Tap1, Abcb1b, Rhoa, Tbcc, Myh9, Entpd1, Tbc1d5, Srpr, Rnf213, Pkp4, Gnai2, Tubb5, Rap2c, Map2k1,
GO:0019725	cellular homeostasis	0.02614 ( 59 of 2257 genes )	0.02067 ( 703 of 34011 annotated genes )	0.003143	1	Immt, Egr2, Scn1b, Rhot1, Bnip3, Ckb, Psen1, Xcl1, Atp6v0c, Csrp3, C5ar1, Txnl1, Atp5b, Txn1, Kdr, Txndc9, Cnr1, Cd38, Dnajc16, Aldoa, Slc6a12, Hif1a, Ppt1, Tmx1, Calca, Pou3f2, Rhag, Mtm1, Commd1, Tspo, Magt1, Apoe, Fkbp1a, Hmgcr, Ccr1, Gimap5, Mir379, Afg3l2, P2ry2, Bcl2l1, Diap1, Scn2a1, Fggy, Gja1, Clns1a, P2rx1, Trdn, Nucb2, Tgm2, Pdia5, Il1b, Cxcl1, Ndrg1, Icam1, Glrx2, Cx3cl1, Adm, Prkca, …
GO:0071822	protein complex subunit o	0.02836 ( 64 of 2257 genes )	0.02279 ( 775 of 34011 annotated genes )	0.003147	1	Tmsb10, Pcbd2, Nck1, Tuba8, Nudt21, Hsp90aa1, Aldh1a7, Ehd1, Ttn, Senp6, Dgkh, Ndufs4, Gsn, Tnf, Aldh1a1, Psmd10, Birc2, Gch1, Nupr1, Tnfaip1, Hmgcr, Kcnb1, Add2, Rhoa, Smad1, Plek, Diap1, Tmed10, Nphs1, Snap23, Cenpj, Dpysl3, Rnf4, Dnaja3, Clint1, Aldoc, Bnip3, Vwf, Prlr, Pomp, Lamc1, Vdac2, Prex1, Gphn, Epb4.9, Ccl24, Prkab1, Psmg1, Mtap1b, Ssna1, Ywhab, Fkbp1a, Vamp8, Mif, Gja1, P2rx1, Xaf1, T…
GO:0007166	cell surface receptor lin	0.09925 ( 224 of 2257 genes )	0.09518 ( 3237 of 34011 annotated genes )	0.003149	1	Clec7a, Olfr707, Vmn1r208, Mirlet7f-2, Mapkapk2, Olfr821, Olfr740, Olfr325, Ccr7, Olfr196, Chst11, Vmn2r105, Olfr263-ps1, Olfr1457, Cysltr1, Olfr1504, Olfr811, Darc, Olfr228, Vmn2r27, Olfr1080, Dgkh, Olfr1404, Jmjd6, Olfr649, Olfr815, Vmn1r47, Olfr787, Olfr771, Nfkb1, Olfr187, Vmn1r231, Ptpn11, Grin3a, Dab2ip, Olfr1246, Nlrc5, Abca1, Stat1, Olfr837, Plek, Mir182, Adam8, P2ry2, Olfr850, Pycard, Rp…
GO:0002218	activation of innate immu	0.00443 ( 10 of 2257 genes )	0.00185 ( 63 of 34011 annotated genes )	0.003268	1	Tnip3, Clec7a, Cd86, Tlr2, Mapkapk2, Trim30a, Ripk2, Tmem173, Adam8, Pycard,
GO:0048856	anatomical structure deve	0.10412 ( 235 of 2257 genes )	0.10044 ( 3416 of 34011 annotated genes )	0.003319	1	Anpep, Psmb10, Scn1b, Mapkapk2, Ywhah, Asz1, Mir133b, Ccr7, Catsperb, Csrp3, Chst11, Hsp90aa1, Rest, Cysltr1, Szt2, Gpi1, Ttn, Lamb1, Lgals1, Psmc4, Chi3l1, Bglap, Gsn, Zmym4, Aldh1a1, Jmjd6, Dact2, Slc4a7, Tspo, Nfkb1, Ppia, Nupr1, Ptpn11, Lhx5, Grin3a, Dab2ip, Foxn3, Hmgcr, Crip2, Stat1, Adam8, P2ry2, Emx2, Trove2, Myl6, Mmp19, Il1a, Erap1, Rbpj, Rgs6, Myo3a, Rab8a, Pkm2, Nphs1, Pebp1, Fech, Dp…
GO:0002752	cell surface pattern reco	0.00089 ( 2 of 2257 genes )	0.00006 ( 2 of 34011 annotated genes )	0.003377	1	Clec7a, Tlr2,
GO:0017185	peptidyl-lysine hydroxyla	0.00089 ( 2 of 2257 genes )	0.00006 ( 2 of 34011 annotated genes )	0.003377	1	Jmjd6, Plod1,
GO:0019442	tryptophan catabolic proc	0.00089 ( 2 of 2257 genes )	0.00006 ( 2 of 34011 annotated genes )	0.003377	1	Tdo2, Kynu,
GO:0042495	detection of triacyl bact	0.00089 ( 2 of 2257 genes )	0.00006 ( 2 of 34011 annotated genes )	0.003377	1	Tlr2, Tlr1,
GO:0051295	establishment of meiotic	0.00089 ( 2 of 2257 genes )	0.00006 ( 2 of 34011 annotated genes )	0.003377	1	Myh9, Fmn2,
GO:0070162	adiponectin secretion	0.00089 ( 2 of 2257 genes )	0.00006 ( 2 of 34011 annotated genes )	0.003377	1	Il1b, Niacr1,
GO:0070163	regulation of adiponectin	0.00089 ( 2 of 2257 genes )	0.00006 ( 2 of 34011 annotated genes )	0.003377	1	Il1b, Niacr1,
GO:0071725	response to triacyl bacte	0.00089 ( 2 of 2257 genes )	0.00006 ( 2 of 34011 annotated genes )	0.003377	1	Tlr2, Tlr1,
GO:0071727	cellular response to tria	0.00089 ( 2 of 2257 genes )	0.00006 ( 2 of 34011 annotated genes )	0.003377	1	Tlr2, Tlr1,
GO:0090169	regulation of spindle ass	0.00089 ( 2 of 2257 genes )	0.00006 ( 2 of 34011 annotated genes )	0.003377	1	Rnf4, Senp6,
GO:0090230	regulation of centromere	0.00089 ( 2 of 2257 genes )	0.00006 ( 2 of 34011 annotated genes )	0.003377	1	Rnf4, Senp6,
GO:0090234	regulation of kinetochore	0.00089 ( 2 of 2257 genes )	0.00006 ( 2 of 34011 annotated genes )	0.003377	1	Rnf4, Senp6,
GO:0043066	negative regulation of ap	0.02348 ( 53 of 2257 genes )	0.01823 ( 620 of 34011 annotated genes )	0.003411	1	Cxcr7, Bnip3, Higd1a, Nme5, Casp4, Psen1, Ywhah, Ccr7, Cd44, Cflar, Fn1, Chst11, C5ar1, Cyr61, Gpi1, Thbs1, Kdr, Cd38, Tex11, Serpinb9, Tsc22d3, Hif1a, Ppt1, Tmx1, Tnf, Psmd10, Tox3, Nfkb1, Birc2, Rnf7, Pnp, Clec5a, Apoe, Hmgcr, Gimap5, Rhoa, Adam8, Cx3cr1, Bcl2l1, Mif, Cd59b, Il2rb, Tmbim6, Aipl1, Il1b, Api5, Pea15a, Vip, Dnaja3, Cx3cl1, Adm, Edn1, Prkca,
GO:0006729	tetrahydrobiopterin biosy	0.00133 ( 3 of 2257 genes )	0.00018 ( 6 of 34011 annotated genes )	0.003434	1	Qdpr, Gch1, Pcbd2,
GO:0006777	Mo-molybdopterin cofactor	0.00133 ( 3 of 2257 genes )	0.00018 ( 6 of 34011 annotated genes )	0.003434	1	Gphn, Mocos, Mocs2,
GO:0019720	Mo-molybdopterin cofactor	0.00133 ( 3 of 2257 genes )	0.00018 ( 6 of 34011 annotated genes )	0.003434	1	Gphn, Mocos, Mocs2,
GO:0032324	molybdopterin cofactor bi	0.00133 ( 3 of 2257 genes )	0.00018 ( 6 of 34011 annotated genes )	0.003434	1	Gphn, Mocos, Mocs2,
GO:0042908	xenobiotic transport	0.00133 ( 3 of 2257 genes )	0.00018 ( 6 of 34011 annotated genes )	0.003434	1	Slc2a1, Abcb1b, Nr1i2,
GO:0043248	proteasome assembly	0.00133 ( 3 of 2257 genes )	0.00018 ( 6 of 34011 annotated genes )	0.003434	1	Psmg1, Pomp, Psmd10,
GO:0043545	molybdopterin cofactor me	0.00133 ( 3 of 2257 genes )	0.00018 ( 6 of 34011 annotated genes )	0.003434	1	Gphn, Mocos, Mocs2,
GO:0048680	positive regulation of ax	0.00133 ( 3 of 2257 genes )	0.00018 ( 6 of 34011 annotated genes )	0.003434	1	Scarf1, Ndel1, Mif,
GO:0051189	prosthetic group metaboli	0.00133 ( 3 of 2257 genes )	0.00018 ( 6 of 34011 annotated genes )	0.003434	1	Gphn, Mocos, Mocs2,
GO:0070572	positive regulation of ne	0.00133 ( 3 of 2257 genes )	0.00018 ( 6 of 34011 annotated genes )	0.003434	1	Scarf1, Ndel1, Mif,
GO:0032880	regulation of protein loc	0.01418 ( 32 of 2257 genes )	0.00973 ( 331 of 34011 annotated genes )	0.003498	1	Tlr2, Psg22, Ppp2r5a, Rangap1, Ccr7, Hsp90aa1, Txn1, Casp1, Clec4n, Tnf, Adam9, Exoc4, Psmd10, Ddx4, Ptpn11, Dab2ip, Clec4e, Clec5a, Ywhab, Tmem30a, Fzd1, Tmem173, Pycard, Bcl2l1, Mif, Il1a, Rab8a, Litaf, Il1b, Vip, Cd14, Cx3cl1,
GO:0072522	purine-containing compoun	0.01108 ( 25 of 2257 genes )	0.00706 ( 240 of 34011 annotated genes )	0.00355	1	Pnp, Nme5, Nppa, Apoe, Atic, Nme4, Abca1, Crh, Atp5b, Mthfd1, Ak2, Guk1, Aldoa, Pkm2, Atp5o, Gnai3, Gnai2, Atp5f1, Calca, Vip, Qtrtd1, Oas1a, Adm, Gmps, Edn1,
GO:0070374	positive regulation of ER	0.00532 ( 12 of 2257 genes )	0.00250 ( 85 of 34011 annotated genes )	0.003664	1	Kdr, Pdgfa, Il1a, A430084P05Rik, Hmgcr, Chi3l1, Ccr1, Ripk2, Il1b, Cd44, Mif, Prkca,
GO:0002821	positive regulation of ad	0.00443 ( 10 of 2257 genes )	0.00188 ( 64 of 34011 annotated genes )	0.003676	1	Pvr, Pnp, Fcgr3, Tap1, Ripk2, Tnf, Gimap5, Xcl1, Cd44, Mif,
GO:0009201	ribonucleoside triphospha	0.00399 ( 9 of 2257 genes )	0.00159 ( 54 of 34011 annotated genes )	0.003685	1	Ctps, Pnp, Nme5, Aldoa, Pkm2, Atp5o, Nme4, Atp5f1, Atp5b,
GO:0009408	response to heat	0.00399 ( 9 of 2257 genes )	0.00159 ( 54 of 34011 annotated genes )	0.003685	1	Hsf3, Il1a, Accn3, Tcfec, Calca, l7Rn6, Dnaja3, Osm, Tgfb1i1,
GO:0016071	mRNA metabolic process	0.01595 ( 36 of 2257 genes )	0.01135 ( 386 of 34011 annotated genes )	0.003705	1	Nudt21, Mir196a-1, Mapkapk2, Srsf3, Ddx39, Tsen2, Gemin7, Ddx1, Magohb, Gspt1, Cwc15, Jmjd6, Prpf4, Lsm5, Dcps, Prpf6, Pdcd11, Ptbp1, Rbm17, Lsm3, Sf3a1, Smg7, Esrp2, Eftud2, Hnrnpc, Prpf31, Snrpe, Syf2, Lsm10, Prpf38a, Ftsjd2, Ncbp2, Snrpa1, Hnrnpa3, Pop4, Zfp36l2,
GO:0010035	response to inorganic sub	0.01285 ( 29 of 2257 genes )	0.00861 ( 293 of 34011 annotated genes )	0.003775	1	Nfe2l2, Ucp2, Bnip3, Nme5, Epx, Prdx6, Homer1, Mir196a-1, Crygd, Mir331, Ccr7, Mir322, Fga, Pdcd6, Egln1, Pld2, Thbs1, Ppp1r15b, Il1a, Ttn, Fgg, Gsn, Xdh, Rnf4, Ggh, Glrx2, Mir34c, Adam9, Prkca,
GO:0001944	vasculature development	0.01949 ( 44 of 2257 genes )	0.01461 ( 497 of 34011 annotated genes )	0.003857	1	Anpep, Psg22, Psen1, Cyr61, Cysltr1, Hspg2, Egln1, Atp5b, Gpi1, Thbs1, Kdr, Hif1a, Chi3l1, Ccl24, Calca, Jmjd6, Slc4a7, Pdgfa, Smad5, Apoe, Fzd1, Stat1, Loxl2, Myh9, Adam8, Cx3cr1, Adam15, Plau, Mmp19, Il1a, Erap1, Rbpj, Gja1, Cd34, Il1b, Cdh5, Robo1, Cx3cl1, Ppap2b, Ccl12, Adm, Edn1, Map2k1, Prkca,
GO:0046653	tetrahydrofolate metaboli	0.00177 ( 4 of 2257 genes )	0.00035 ( 12 of 34011 annotated genes )	0.003864	1	Mthfd1l, Gch1, Aldh1l2, Atic,
GO:0071453	cellular response to oxyg	0.00266 ( 6 of 2257 genes )	0.00079 ( 27 of 34011 annotated genes )	0.003937	1	Bnip3, Higd1a, Npepps, Adam8, Fam162a, Hif1a,
GO:0051251	positive regulation of ly	0.00842 ( 19 of 2257 genes )	0.00491 ( 167 of 34011 annotated genes )	0.003982	1	Pnp, Nck1, Ap3b1, Pdcd1lg2, Cd47, Gimap5, Ccr7, Lyst, Hsp90aa1, Adam8, Mif, Cd86, Cd59b, Cd38, Lgals1, Ripk2, Il1b, Dnaja3, Il2rg,
GO:0006662	glycerol ether metabolic	0.00576 ( 13 of 2257 genes )	0.00285 ( 97 of 34011 annotated genes )	0.004037	1	Txn1, Ppap2a, Insig2, Ptpn11, Lmf1, Slc22a4, Ldlr, Apoe, Dgkh, Tmem195, Pdia5, Acsl5, Txnl1,
GO:0008380	RNA splicing	0.01108 ( 25 of 2257 genes )	0.00714 ( 243 of 34011 annotated genes )	0.004171	1	Prpf6, Srsf3, Ptbp1, Rbm17, Sf3a1, Ddx39, Lsm3, Tsen2, Esrp2, Gemin7, Eftud2, Magohb, Hnrnpc, Snrpe, Prpf31, Lsm10, Syf2, Prpf38a, Cwc15, Prpf4, Ncbp2, Jmjd6, Snrpa1, Hnrnpa3, Lsm5,
GO:0006195	purine nucleotide catabol	0.01905 ( 43 of 2257 genes )	0.01429 ( 486 of 34011 annotated genes )	0.00429	1	Rhot1, Tuba8, Tbc1d8, Nudt9, Ccr7, Arhgap6, Atp6v0c, Gnb4, Hsp90aa1, Atp5b, Tbc1d2b, Srgap2, Ndel1, Cnn3, Atp5o, Gnai3, Ccl24, Dock4, Atp5f1, Rragc, Rfc3, Psmc5, Pip5k1a, Gch1, Abcc5, Dab2ip, Rhoj, Mras, Iigp1, Tap1, Abcb1b, Rhoa, Tbcc, Myh9, Entpd1, Tbc1d5, Srpr, Rnf213, Pkp4, Gnai2, Tubb5, Rap2c, Map2k1,
GO:0010740	positive regulation of in	0.01462 ( 33 of 2257 genes )	0.01026 ( 349 of 34011 annotated genes )	0.004299	1	Pdgfa, Prl, Pdcd11, Fkbp1a, Hmgcr, Ccr1, Cd44, Adam8, Osm, Mif, Thbs1, Kdr, Il1a, Stk3, Gja1, Eef1d, A430084P05Rik, Ltbr, S100a13, Lgals1, Clec4n, Tgm2, Chi3l1, Litaf, Ripk2, Trim38, Il1b, Zdhhc17, Tnf, Cenpj, Kit, Ube2n, Prkca,
GO:0006468	protein phosphorylation	0.04032 ( 91 of 2257 genes )	0.03487 ( 1186 of 34011 annotated genes )	0.004318	1	Bub1b, Dab2, Mapkapk2, Psen1, Ccr7, Cd44, Cyr61, Osm, Stk3, Dusp19, Ttn, Chi3l1, Polr2i, Ripk2, Dgkh, Ndufs4, Ppp2r5d, Tnf, Mapk6, Mapksp1, Agk, Ikbkap, Grk4, Adam9, Psmd10, Dnajc3, Ptpn11, Dab2ip, Apoe, Hmgcr, Tlk2, Smad1, Adam8, Stk31, Rps6ka4, Pdk1, Myo3a, Camk2g, Cish, B230120H23Rik, Gnai2, Pebp1, Fech, Rap2c, Dnaja3, Ppap2b, Prkca, Edn1, Mlkl, Tlr2, Eif2s1, Prlr, Acvr2a, Tesk1, Tnik, Dusp6, …
GO:0006164	purine nucleotide biosynt	0.01063 ( 24 of 2257 genes )	0.00679 ( 231 of 34011 annotated genes )	0.004359	1	Pnp, Nme5, Nppa, Apoe, Atic, Nme4, Abca1, Crh, Atp5b, Mthfd1, Ak2, Guk1, Aldoa, Pkm2, Atp5o, Gnai3, Gnai2, Atp5f1, Calca, Vip, Oas1a, Adm, Gmps, Edn1,
GO:0051128	regulation of cellular co	0.03810 ( 86 of 2257 genes )	0.03270 ( 1112 of 34011 annotated genes )	0.004418	1	Clec7a, Kdm3a, Tmsb10, Scn1b, Ndufs3, Nck1, Ptpn1, Dab2, Psen1, Ywhah, Ccr7, Arhgap6, Eno1, Cd44, Hsp90aa1, Cyr61, Parl, Cd38, Senp6, Lgals1, Ppt1, Gsn, Ppp2r5d, Zmym4, Tnf, Pou3f2, Adam9, Psmd10, Sgip1, Dab2ip, Fcgr3, Cd47, Tlk2, Add2, Rhoa, Plek, P2ry2, Tnfsf10, Bcl2l1, Pld2, Rps6ka4, Il1a, Myo3a, Nphs1, Cenpj, Pebp1, Dpysl3, Rnf4, Prkca, Edn1, Bnip3, Sh3d19, Nppa, Ppp2r5a, Vim, Ranbp1, Vdac2, …
GO:0009968	negative regulation of si	0.01949 ( 44 of 2257 genes )	0.01473 ( 501 of 34011 annotated genes )	0.004453	1	Dab2, Phb2, Psen1, Smurf1, Cd44, Chst11, Skor2, Dusp6, Thbs1, Stk3, Cnksr3, Hif1a, Rgs16, Calca, Nphp3, Grk4, Psmd10, Socs6, Tnfaip1, Dab2ip, Nlrc5, Rgs18, Fzd1, Stat1, Rhoa, Mapkapk5, Plek, Tgfb1i1, Pld2, Mif, Tnip3, Rgs6, Pak1ip1, Cish, Trim30a, Il1b, Xdh, Pebp1, Robo1, Snx6, Dnaja3, Adm, Aspn, Prkca,
GO:0031399	regulation of protein mod	0.03013 ( 68 of 2257 genes )	0.02487 ( 846 of 34011 annotated genes )	0.004505	1	Kdm3a, Dab2, Psen1, Ccr7, Cd44, Cyr61, Osm, Stk3, Dusp19, Ttn, Chi3l1, Ripk2, Dgkh, Ndufs4, Ppp2r5d, Tnf, Mapksp1, Agk, Adam9, Psmd10, Dnajc3, Nupr1, Ptpn11, Dab2ip, Apoe, Hmgcr, Adam8, Rps6ka4, Cish, Gnai2, Aimp2, Pebp1, Fech, Rap2c, Dnaja3, Ppap2b, Prkca, Edn1, Prlr, Smurf1, Ppp2r5a, Acvr2a, Tnik, Dusp6, Thbs1, Sumo3, Cnksr3, Akap13, Csnk2b, Calca, Ube2n, Commd1, Tlr1, Csf1, Pdgfa, Ywhab, Fkbp1…
GO:0050673	epithelial cell prolifera	0.01063 ( 24 of 2257 genes )	0.00682 ( 232 of 34011 annotated genes )	0.004601	1	Prl, Wdr77, Dab2ip, Phb2, Apoe, Psen1, Stat1, Loxl2, Pla2g2a, Sav1, Plau, Thbs1, Kdr, Cd34, Xdh, Ccl24, Tnf, Calca, Aimp1, Robo1, Vip, Fabp7, Kit, Prkca,
GO:0001932	regulation of protein pho	0.02570 ( 58 of 2257 genes )	0.02064 ( 702 of 34011 annotated genes )	0.00471	1	Dab2, Prlr, Psen1, Ccr7, Cd44, Acvr2a, Tnik, Cyr61, Osm, Dusp6, Thbs1, Stk3, Dusp19, Cnksr3, Ttn, Akap13, Chi3l1, Dgkh, Ndufs4, Ppp2r5d, Csnk2b, Tnf, Calca, Mapksp1, Agk, Adam9, Tlr1, Psmd10, Dnajc3, Csf1, Pdgfa, Ptpn11, Dab2ip, Apoe, Fkbp1a, Hmgcr, Fzd1, Adam8, Lrp8, Spred2, Crh, Rps6ka4, Mif, Cish, Xdh, Il1b, Gnai2, Pebp1, Arr3, Fech, Rap2c, Ccnh, Dnaja3, Kit, Ppap2b, Prkca, Edn1, Map2k1,
GO:0032370	positive regulation of li	0.00266 ( 6 of 2257 genes )	0.00082 ( 28 of 34011 annotated genes )	0.004768	1	Abca1, Il1b, Acsl5, P2ry2, Apoe, Mif,
GO:0018904	organic ether metabolic p	0.00576 ( 13 of 2257 genes )	0.00291 ( 99 of 34011 annotated genes )	0.004815	1	Txn1, Ppap2a, Insig2, Ptpn11, Lmf1, Slc22a4, Ldlr, Apoe, Dgkh, Tmem195, Pdia5, Acsl5, Txnl1,
GO:0048193	Golgi vesicle transport	0.00576 ( 13 of 2257 genes )	0.00291 ( 99 of 34011 annotated genes )	0.004815	1	Sec22b, Lmf1, Snx1, Rab8a, Slc30a6, Trappc1, Chic2, Stx6, Sec23b, Blzf1, Rer1, Exoc4, Vps29,
GO:0065003	macromolecular complex as	0.03101 ( 70 of 2257 genes )	0.02582 ( 878 of 34011 annotated genes )	0.004829	1	Tmsb10, Pcbd2, Nck1, Tuba8, Nudt21, Hsp90aa1, Aldh1a7, Ehd1, Ttn, Senp6, Dgkh, Ndufs4, Gsn, Tnf, Aldh1a1, Psmd10, Birc2, Gch1, Nupr1, Prpf6, Rps2, Tnfaip1, Apoe, Hmgcr, Kcnb1, Abca1, Add2, Rhoa, Smad1, Plek, Diap1, Tmed10, Prpf31, Nphs1, Snap23, Cenpj, Fech, Dpysl3, Rnf4, Dnaja3, Aldoc, Clint1, Vwf, Prlr, Pomp, Lamc1, H2afz, Vdac2, Prex1, Gphn, Epb4.9, Ccl24, Prkab1, Psmg1, Mtap1b, Ywhab, Ssna1, …
GO:0071222	cellular response to lipo	0.00665 ( 15 of 2257 genes )	0.00359 ( 122 of 34011 annotated genes )	0.004837	1	Tnip3, Mir484, Tnfrsf1b, Mir217, Litaf, Ripk2, Il1b, Abca1, Stat1, Tnf, Gbp6, Adam9, Cd14, Prkca, Mif,
GO:0051051	negative regulation of tr	0.01196 ( 27 of 2257 genes )	0.00800 ( 272 of 34011 annotated genes )	0.004869	1	Ptpn11, Mtap1b, Dab2ip, Ywhab, Hmgcr, Fzd1, Rangap1, Osm, Crh, Rest, Thbs1, Txn1, Cnr1, Fcgr2b, Litaf, Il1b, Tnf, Calca, Pea15a, Vip, Plcb4, Icam1, Bcr, Cx3cl1, Prkca, Edn1, Psmd10,
GO:0018208	peptidyl-proline modifica	0.00222 ( 5 of 2257 genes )	0.00059 ( 20 of 34011 annotated genes )	0.00491	1	Fkbp7, Fkbp2, Fkbp9, Leprel1, Fkbp1a,
GO:0044060	regulation of endocrine p	0.00222 ( 5 of 2257 genes )	0.00059 ( 20 of 34011 annotated genes )	0.00491	1	Il1b, Ptpn11, Niacr1, Acvr2a, Crh,
GO:0046939	nucleotide phosphorylatio	0.00222 ( 5 of 2257 genes )	0.00059 ( 20 of 34011 annotated genes )	0.00491	1	Nme4, Ak2, Guk1, Nme5, Ak4,
GO:0032270	positive regulation of ce	0.01728 ( 39 of 2257 genes )	0.01279 ( 435 of 34011 annotated genes )	0.005074	1	Dab2, Tnfrsf1b, Sh3d19, Psen1, Smurf1, Ppp2r5a, Cd44, Acvr2a, Cyr61, Osm, Thbs1, Sumo3, Chi3l1, Ripk2, Csnk2b, Tnf, Commd1, Ube2n, Adam9, Psmd10, Csf1, Pdgfa, Nupr1, Rnf180, Apoe, Fkbp1a, Fzd1, Adam8, Crh, Lrp8, Rps6ka4, Mif, Il1b, Aimp2, Rap2c, Kit, Dnaja3, Ppap2b, Prkca,
GO:0050921	positive regulation of ch	0.00443 ( 10 of 2257 genes )	0.00197 ( 67 of 34011 annotated genes )	0.005143	1	Kdr, Thbs1, Cmklr1, Ccr1, Xcl1, Ccr7, Ager, Cx3cl1, Edn1, Prkca,
GO:0010823	negative regulation of mi	0.00177 ( 4 of 2257 genes )	0.00038 ( 13 of 34011 annotated genes )	0.005326	1	Bnip3, Parl, Bcl2l1, Psmd10,
GO:0010829	negative regulation of gl	0.00177 ( 4 of 2257 genes )	0.00038 ( 13 of 34011 annotated genes )	0.005326	1	Il1b, Tnf, Pea15a, Prkca,
GO:0048520	positive regulation of be	0.00487 ( 11 of 2257 genes )	0.00229 ( 78 of 34011 annotated genes )	0.005328	1	Kdr, Thbs1, Casp1, Cmklr1, Ccr1, Ager, Xcl1, Ccr7, Cx3cl1, Edn1, Prkca,
GO:0009142	nucleoside triphosphate b	0.00399 ( 9 of 2257 genes )	0.00168 ( 57 of 34011 annotated genes )	0.005336	1	Ctps, Pnp, Nme5, Aldoa, Pkm2, Atp5o, Nme4, Atp5f1, Atp5b,
GO:0051338	regulation of transferase	0.02038 ( 46 of 2257 genes )	0.01573 ( 535 of 34011 annotated genes )	0.005452	1	Prlr, Psen1, Ppp2r5a, Ccr7, Tnik, Cyr61, Dusp6, Thbs1, Stk3, Dusp19, Ttn, Akap13, Chi3l1, Dgkh, Tnf, Calca, Mapksp1, Agk, Adam9, Tlr1, Psmd10, Dnajc3, Csf1, Pdgfa, Ptpn11, Dab2ip, Apoe, Hmgcr, Nlrc5, Dusp12, Adam8, Lrp8, Spred2, Mif, Cish, Il1b, Prpsap1, Gnai2, Rbl1, Ccnh, Rap2c, Kit, Dnaja3, Edn1, Map2k1, Prkca,
GO:0050708	regulation of protein sec	0.00620 ( 14 of 2257 genes )	0.00329 ( 112 of 34011 annotated genes )	0.00549	1	Il1a, Tlr2, Clec5a, Casp1, Clec4e, Psg22, Clec4n, Tnf, Ccr7, Adam9, Cx3cl1, Cd14, Pycard, Mif,
GO:0048514	blood vessel morphogenesi	0.01639 ( 37 of 2257 genes )	0.01205 ( 410 of 34011 annotated genes )	0.005607	1	Anpep, Psg22, Cyr61, Cysltr1, Hspg2, Egln1, Atp5b, Gpi1, Thbs1, Kdr, Hif1a, Chi3l1, Ccl24, Jmjd6, Pdgfa, Smad5, Apoe, Stat1, Loxl2, Myh9, Cx3cr1, Adam8, Adam15, Plau, Mmp19, Erap1, Il1a, Gja1, Rbpj, Cd34, Il1b, Robo1, Cx3cl1, Adm, Ccl12, Edn1, Prkca,
GO:0006694	steroid biosynthetic proc	0.00665 ( 15 of 2257 genes )	0.00365 ( 124 of 34011 annotated genes )	0.005628	1	Insig2, Il1a, Ch25h, Cyp51, Apoe, Hmgcr, Tnf, Fdft1, Hsd17b7, Sc4mol, Tspo, Crh, Rest, Ebp, Lss,
GO:0080090	regulation of primary met	0.11342 ( 256 of 2257 genes )	0.11152 ( 3793 of 34011 annotated genes )	0.00564	1	Nfe2l2, Mapkapk2, 4930447C04Rik, Sbno2, Ywhah, Ets2, Lhb, Ccr7, Xcl1, Arhgap6, Eif4e, Rest, Tada2a, Ttn, Cnn3, Chi3l1, Dgkh, Jmjd6, Ikbkap, Eif3k, Tspo, Zfp516, Nfkb1, Nupr1, Ptpn11, Lhx5, Prpf6, Nr5a2, Npas3, Dab2ip, 0610031J06Rik, Foxn3, Serpinb8, Hmgcr, Nlrc5, Abca1, Stat1, Plek, Adam8, Tfdp2, Pycard, Rps6ka4, Esrp2, Tbc1d5, Tceb1, Il1a, Rnf141, Rbpj, Chaf1b, 2700060E02Rik, Cish, Nr1i2, Lrrfip…
GO:0009166	nucleotide catabolic proc	0.01949 ( 44 of 2257 genes )	0.01494 ( 508 of 34011 annotated genes )	0.005685	1	Rhot1, Tuba8, Tbc1d8, Nudt9, Ccr7, Arhgap6, Atp6v0c, Gnb4, Hsp90aa1, Atp5b, Tbc1d2b, Srgap2, Ndel1, Cnn3, Atp5o, Gnai3, Ccl24, Dock4, Atp5f1, Rragc, Rfc3, Psmc5, Pip5k1a, Gch1, Abcc5, Dab2ip, Rhoj, Mras, Iigp1, Tap1, Abcb1b, Rhoa, Tbcc, Myh9, Entpd1, Tbc1d5, Entpd7, Srpr, Rnf213, Pkp4, Gnai2, Tubb5, Rap2c, Map2k1,
GO:0006082	organic acid metabolic pr	0.02525 ( 57 of 2257 genes )	0.02041 ( 694 of 34011 annotated genes )	0.005693	1	Ctps, Acly, Suclg1, Aadat, Degs1, Csgalnact1, Bbox1, Tmem195, Scd2, Ldha, Mthfd1, Fasn, Elovl3, Cnr1, Agxt, Slc22a4, Kynu, Acsm2, Hif1a, Aldh1a1, Acmsd, Acot2, Elovl2, Hars, Prkab1, Crat, Gmps, Hibadh, Hpgd, Mthfd1l, Mdh2, Insig2, Nr5a2, Ch25h, Pnp, Aldh18a1, Acsl5, Lao1, BC026590, Pla2g2a, Sc4mol, Slc23a2, Ptgr1, Mif, Hdc, Bckdk, Tdo2, Pgcp, Cd34, Lgsn, Pkm2, Rars, Abcg2, Far1, Ggh, Cs, Edn1,
GO:0006446	regulation of translation	0.00310 ( 7 of 2257 genes )	0.00112 ( 38 of 34011 annotated genes )	0.005712	1	Tnf, Ppp1r15b, Eif3b, Ncbp2, Eif2s1, Fech, Eif3k,
GO:0001913	T cell mediated cytotoxic	0.00266 ( 6 of 2257 genes )	0.00085 ( 29 of 34011 annotated genes )	0.005721	1	Pvr, Pnp, Xcl1, Ppp3cb, Serpinb9, Tap1,
GO:0006921	cellular component disass	0.00266 ( 6 of 2257 genes )	0.00085 ( 29 of 34011 annotated genes )	0.005721	1	Ppt1, Apaf1, Dnase1l3, Bnip3, Cycs, Gzma,
GO:0032722	positive regulation of ch	0.00266 ( 6 of 2257 genes )	0.00085 ( 29 of 34011 annotated genes )	0.005721	1	Ripk2, Il1b, Tnf, Tlr2, P2ry2, Mif,
GO:0006569	tryptophan catabolic proc	0.00133 ( 3 of 2257 genes )	0.00021 ( 7 of 34011 annotated genes )	0.00575	1	Aadat, Tdo2, Kynu,
GO:0009191	ribonucleoside diphosphat	0.00133 ( 3 of 2257 genes )	0.00021 ( 7 of 34011 annotated genes )	0.00575	1	Nudt9, Entpd7, Entpd1,
GO:0010950	positive regulation of en	0.00133 ( 3 of 2257 genes )	0.00021 ( 7 of 34011 annotated genes )	0.00575	1	Psmd14, Psme2, Psme1,
GO:0019441	tryptophan catabolic proc	0.00133 ( 3 of 2257 genes )	0.00021 ( 7 of 34011 annotated genes )	0.00575	1	Aadat, Tdo2, Kynu,
GO:0035457	cellular response to inte	0.00133 ( 3 of 2257 genes )	0.00021 ( 7 of 34011 annotated genes )	0.00575	1	Ifit1, Ifit3, Ifit2,
GO:0042436	indole-containing compoun	0.00133 ( 3 of 2257 genes )	0.00021 ( 7 of 34011 annotated genes )	0.00575	1	Aadat, Tdo2, Kynu,
GO:0042482	positive regulation of od	0.00133 ( 3 of 2257 genes )	0.00021 ( 7 of 34011 annotated genes )	0.00575	1	Csf1, Cd34, Edn1,
GO:0045651	positive regulation of ma	0.00133 ( 3 of 2257 genes )	0.00021 ( 7 of 34011 annotated genes )	0.00575	1	Csf1, Calca, Prkca,
GO:0046218	indolalkylamine catabolic	0.00133 ( 3 of 2257 genes )	0.00021 ( 7 of 34011 annotated genes )	0.00575	1	Aadat, Tdo2, Kynu,
GO:0060558	regulation of calcidiol 1	0.00133 ( 3 of 2257 genes )	0.00021 ( 7 of 34011 annotated genes )	0.00575	1	Il1b, Tnf, Nfkb1,
GO:0070391	response to lipoteichoic	0.00133 ( 3 of 2257 genes )	0.00021 ( 7 of 34011 annotated genes )	0.00575	1	Ripk2, Tlr2, Cd14,
GO:0071223	cellular response to lipo	0.00133 ( 3 of 2257 genes )	0.00021 ( 7 of 34011 annotated genes )	0.00575	1	Ripk2, Tlr2, Cd14,
GO:0051092	positive regulation of NF	0.00487 ( 11 of 2257 genes )	0.00232 ( 79 of 34011 annotated genes )	0.005872	1	Psma6, Tlr2, Il1b, Ripk2, Tnf, Ager, Icam1, Adam8, Ube2n, Mtpn, Pycard,
GO:0051168	nuclear export	0.00487 ( 11 of 2257 genes )	0.00232 ( 79 of 34011 annotated genes )	0.005872	1	Fyttd1, Txn1, Egr2, Ptpn11, Xpo5, Xpo6, Akap13, Smurf1, Rangap1, Xpo7, Ddx39,
GO:0051094	positive regulation of de	0.02481 ( 56 of 2257 genes )	0.02002 ( 681 of 34011 annotated genes )	0.005945	1	Bnip3, Psg22, Vim, Ccr7, Fndc3b, Acvr2a, Hsp90aa1, Cyr61, Cysltr1, Thbs1, Kdr, Ndel1, Hif1a, Chi3l1, Ripk2, Ccl24, Tnf, Calca, Tspo, Adam9, Dmbt1, Il2rg, Csf1, Smad5, Pnp, Mtap1b, Caprin1, Ap3b1, Hmgcr, Ccr1, Gimap5, Rhoa, Loxl2, Smad1, Adam8, Cx3cr1, Lrp8, Tgfb1i1, Mif, Il1a, Erap1, Rbpj, Gja1, Cd34, Rgs6, Il1b, Scarf1, Robo1, Tbx2, Ncoa1, Kit, Cx3cl1, Adm, Edn1, Map2k1, Prkca,
GO:0006644	phospholipid metabolic pr	0.01019 ( 23 of 2257 genes )	0.00659 ( 224 of 34011 annotated genes )	0.005961	1	Pip5k1a, Pdgfa, Alg9, Prdx6, Mboat1, Smpdl3b, Acsl5, Pgs1, Plek, Lyst, Pla2g2a, Pld2, Pla2g2d, Pip5kl1, Pigu, Ldlr, Ip6k1, Inpp5b, Sgms2, Fdft1, Mtm1, Ppap2b, Pla2g16,
GO:0017038	protein import	0.01063 ( 24 of 2257 genes )	0.00697 ( 237 of 34011 annotated genes )	0.005985	1	Snupn, Prl, Tlr2, Dab2ip, Ipo7, Sec61b, Tnpo3, Fzd1, Ipo13, l7Rn6, Txnip, Timm8a1, Hsp90aa1, Tmem173, Txn1, Kpnb1, Kpna3, Stat3, Litaf, Il1b, Tnf, Kpna2, Kpna6, Psmd10,
GO:0006809	nitric oxide biosynthetic	0.00354 ( 8 of 2257 genes )	0.00141 ( 48 of 34011 annotated genes )	0.006047	1	Tlr2, Cd34, Il1b, Tnf, Gimap5, Hsp90aa1, Tspo, Icam1,
GO:0032642	regulation of chemokine p	0.00354 ( 8 of 2257 genes )	0.00141 ( 48 of 34011 annotated genes )	0.006047	1	Tlr2, Darc, Il1b, Ripk2, Tnf, Mefv, P2ry2, Mif,
GO:0002438	acute inflammatory respon	0.00222 ( 5 of 2257 genes )	0.00062 ( 21 of 34011 annotated genes )	0.00614	1	Cnr1, Fcgr2b, Ccr7, Fcgr3, Serpinb9,
GO:0032800	receptor biosynthetic pro	0.00222 ( 5 of 2257 genes )	0.00062 ( 21 of 34011 annotated genes )	0.00614	1	Tnf, Ace2, Ankrd13c, Hif1a, Edn1,
GO:0046513	ceramide biosynthetic pro	0.00222 ( 5 of 2257 genes )	0.00062 ( 21 of 34011 annotated genes )	0.00614	1	Sgms2, Agk, P2rx1, Lass6, Cyr61,
GO:0031323	regulation of cellular me	0.11564 ( 261 of 2257 genes )	0.11417 ( 3883 of 34011 annotated genes )	0.006331	1	Nfe2l2, Farp1, Mapkapk2, 4930447C04Rik, Sbno2, Lhb, Hsp90aa1, Eif4e, Rest, Tada2a, Ttn, Dgkh, Jmjd6, Ikbkap, Eif3k, Tspo, Zfp516, Nupr1, Ptpn11, Lhx5, Prpf6, Npas3, Dab2ip, 0610031J06Rik, Foxn3, Hmgcr, Nlrc5, Abca1, Pycard, Tceb1, Il1a, Rbpj, Chaf1b, 2700060E02Rik, Nr1i2, Gnai2, Snx6, Rnf4, Hivep1, Tlr2, Smurf1, Acvr2a, Tnik, Mtpn, Dusp6, Txn1, Cnr1, Srgap2, Ndel1, Ankrd13c, Ube2n, Tox3, Pip5k1a,…
GO:0000302	response to reactive oxyg	0.00532 ( 12 of 2257 genes )	0.00268 ( 91 of 34011 annotated genes )	0.006391	1	Nfe2l2, Ppp1r15b, Ucp2, Bnip3, Nme5, Epx, Prdx6, Crygd, Glrx2, Adam9, Pld2, Prkca,
GO:0050680	negative regulation of ep	0.00487 ( 11 of 2257 genes )	0.00235 ( 80 of 34011 annotated genes )	0.006459	1	Thbs1, Wdr77, Dab2ip, Phb2, Apoe, Xdh, Stat1, Aimp1, Robo1, Pla2g2a, Sav1,
GO:0000165	MAPKKK cascade	0.01728 ( 39 of 2257 genes )	0.01300 ( 442 of 34011 annotated genes )	0.006573	1	Psen1, Ccr7, Cd44, Tnik, Cyr61, Osm, Dusp6, Thbs1, Kdr, Stk3, Dusp19, Cnksr3, A430084P05Rik, Chi3l1, Ripk2, Tnf, Mapk6, Mapksp1, Adam9, Psmd10, Pdgfa, Ptpn11, Dab2ip, Hmgcr, Ccr1, Smad1, Adam8, Spred2, Mif, Il1a, Ltbr, Il1b, Nphs1, Gnai2, Pebp1, Kit, Edn1, Map2k1, Prkca,
GO:0007006	mitochondrial membrane or	0.00310 ( 7 of 2257 genes )	0.00115 ( 39 of 34011 annotated genes )	0.006619	1	Gimap5, Afg3l2, Bnip3, Afg3l1, Chchd3, Hsp90aa1, Bcl2l1,
GO:0022029	telencephalon cell migrat	0.00310 ( 7 of 2257 genes )	0.00115 ( 39 of 34011 annotated genes )	0.006619	1	Robo1, Pou3f2, Srgap2, Ndel1, Cx3cr1, Lrp8, Psen1,
GO:0046039	GTP metabolic process	0.01418 ( 32 of 2257 genes )	0.01017 ( 346 of 34011 annotated genes )	0.006711	1	Rhot1, Tuba8, Nme5, Tbc1d8, Nme4, Ccr7, Arhgap6, Gnb4, Tbc1d2b, Srgap2, Ndel1, Gnai3, Ccl24, Dock4, Rragc, Ak4, Gch1, Pip5k1a, Pnp, Dab2ip, Rhoj, Iigp1, Mras, Rhoa, Tbcc, Tbc1d5, Srpr, Pkp4, Gnai2, Tubb5, Rap2c, Map2k1,
GO:0002861	regulation of inflammator	0.00266 ( 6 of 2257 genes )	0.00088 ( 30 of 34011 annotated genes )	0.006806	1	Cnr1, Tnf, Fcgr2b, Ccr7, Fcgr3, Psmb4,
GO:0006308	DNA catabolic process	0.00266 ( 6 of 2257 genes )	0.00088 ( 30 of 34011 annotated genes )	0.006806	1	Ppt1, Apaf1, Dnase1l3, Bnip3, Cycs, Ube2n,
GO:0090199	regulation of release of	0.00266 ( 6 of 2257 genes )	0.00088 ( 30 of 34011 annotated genes )	0.006806	1	Bnip3, Parl, Tnfsf10, Fam162a, Bcl2l1, Psmd10,
GO:0001568	blood vessel development	0.01817 ( 41 of 2257 genes )	0.01385 ( 471 of 34011 annotated genes )	0.006809	1	Anpep, Psg22, Psen1, Cyr61, Cysltr1, Hspg2, Egln1, Atp5b, Gpi1, Thbs1, Kdr, Hif1a, Chi3l1, Ccl24, Jmjd6, Pdgfa, Smad5, Apoe, Stat1, Loxl2, Myh9, Adam8, Cx3cr1, Adam15, Plau, Mmp19, Erap1, Il1a, Rbpj, Gja1, Cd34, Il1b, Cdh5, Robo1, Cx3cl1, Ppap2b, Ccl12, Adm, Edn1, Map2k1, Prkca,
GO:0023057	negative regulation of si	0.02038 ( 46 of 2257 genes )	0.01594 ( 542 of 34011 annotated genes )	0.006865	1	Dab2, Phb2, Psen1, Smurf1, Cd44, Chst11, Skor2, Dusp6, Thbs1, Stk3, Cnksr3, Cd38, Hif1a, Rgs16, Calca, Nphp3, Grk4, Psmd10, Socs6, Tnfaip1, Dab2ip, Nlrc5, Rgs18, Fzd1, Stat1, Rhoa, Mapkapk5, Plek, Tgfb1i1, Pld2, Mif, Tnip3, Rgs6, Pak1ip1, Cish, Trim30a, Il1b, Xdh, Gnai2, Pebp1, Robo1, Snx6, Dnaja3, Adm, Aspn, Prkca,
GO:0008053	mitochondrial fusion	0.00177 ( 4 of 2257 genes )	0.00041 ( 14 of 34011 annotated genes )	0.007117	1	Afg3l2, Bnip3, Afg3l1, Chchd3,
GO:0010466	negative regulation of pe	0.00975 ( 22 of 2257 genes )	0.00632 ( 215 of 34011 annotated genes )	0.007324	1	Serpina3n, Serpinb8, Serpinh1, Prol1, Cflar, Cd44, Serpinb3a, Bcl2l1, Gpi1, Thbs1, Stfa3, Cst7, Serpinb11, Cstb, Serpinb9, Itih3, Csnk2a1, Wfdc6b, Pebp1, Serpinb2, Dnaja3, Serpinb3c,
GO:0050865	regulation of cell activa	0.01329 ( 30 of 2257 genes )	0.00944 ( 321 of 34011 annotated genes )	0.007342	1	Socs6, Pdgfa, Pnp, Nck1, Ap3b1, Pdcd1lg2, Cd47, Apoe, Gimap5, Ccr7, Plek, Lyst, Hsp90aa1, Adam8, Mif, Pld2, Cd59b, Cd86, Thbs1, Cnr1, Fcgr2b, Cd38, Cd209a, Lgals1, Ripk2, Il1b, Dnaja3, Bcr, Il2rg, Prkca,
GO:0060255	regulation of macromolecu	0.11210 ( 253 of 2257 genes )	0.11073 ( 3766 of 34011 annotated genes )	0.007346	1	Nfe2l2, Mapkapk2, 4930447C04Rik, Sbno2, Ywhah, Asz1, Mir133b, Ets2, Ccr7, Xcl1, Eif4e, Rest, Tada2a, Ttn, Chi3l1, Dgkh, Jmjd6, Ikbkap, Eif3k, Zfp516, Nfkb1, Nupr1, Ptpn11, Lhx5, Prpf6, Nr5a2, Npas3, Dab2ip, 0610031J06Rik, Foxn3, Serpinb8, Hmgcr, Nlrc5, Stat1, Adam8, Tfdp2, Emx2, Pycard, Rps6ka4, Esrp2, Tceb1, Il1a, Rnf141, Rbpj, Chaf1b, 2700060E02Rik, Cish, Nr1i2, Lrrfip1, Gnai2, Pebp1, Fech, Snx…
GO:0050701	interleukin-1 secretion	0.00222 ( 5 of 2257 genes )	0.00065 ( 22 of 34011 annotated genes )	0.007572	1	Abca1, Ccr7, Casp1, S100a13, Pycard,
GO:2000191	regulation of fatty acid	0.00222 ( 5 of 2257 genes )	0.00065 ( 22 of 34011 annotated genes )	0.007572	1	Il1b, Thbs1, Acsl5, P2ry2, Mif,
GO:0050994	regulation of lipid catab	0.00310 ( 7 of 2257 genes )	0.00118 ( 40 of 34011 annotated genes )	0.007628	1	Il1b, Cnr1, Gimap5, Tnf, Niacr1, Acsl5, Ldlr,
GO:0002456	T cell mediated immunity	0.00354 ( 8 of 2257 genes )	0.00147 ( 50 of 34011 annotated genes )	0.007767	1	Pvr, Pnp, Serpinb9, Tap1, Xcl1, Lyst, Ppp3cb, Icam1,
GO:0032602	chemokine production	0.00354 ( 8 of 2257 genes )	0.00147 ( 50 of 34011 annotated genes )	0.007767	1	Tlr2, Darc, Il1b, Ripk2, Tnf, Mefv, P2ry2, Mif,
GO:0022407	regulation of cell-cell a	0.00443 ( 10 of 2257 genes )	0.00209 ( 71 of 34011 annotated genes )	0.007771	1	Cd47, Lgals1, Il1b, Tnf, Cd44, Adam8, Cx3cl1, Ppap2b, Map2k1, Prkca,
GO:0010648	negative regulation of ce	0.02038 ( 46 of 2257 genes )	0.01605 ( 546 of 34011 annotated genes )	0.007802	1	Dab2, Phb2, Psen1, Smurf1, Cd44, Chst11, Skor2, Dusp6, Thbs1, Stk3, Cnksr3, Cd38, Hif1a, Rgs16, Calca, Nphp3, Grk4, Psmd10, Socs6, Tnfaip1, Dab2ip, Nlrc5, Rgs18, Fzd1, Stat1, Rhoa, Mapkapk5, Plek, Tgfb1i1, Pld2, Mif, Tnip3, Rgs6, Pak1ip1, Cish, Trim30a, Il1b, Xdh, Gnai2, Pebp1, Robo1, Snx6, Dnaja3, Adm, Aspn, Prkca,
GO:0051098	regulation of binding	0.01684 ( 38 of 2257 genes )	0.01273 ( 433 of 34011 annotated genes )	0.007863	1	Tlr2, Dab2, 4930447C04Rik, Psen1, Xcl1, Eno1, Gzma, Mtpn, Egln1, Txn1, Ica1, Ripk2, Ifit1, Tnf, Commd1, Ube2n, Psmd10, Dab2ip, Foxn3, Cmklr1, Fkbp1a, Nlrc5, Fzd1, Add2, Adam8, Tmem173, Pycard, Lrp8, Cytl1, Psma6, Epb4.1, Il1b, Ager, Ifit2, Icam1, Kit, Dnaja3, Ppap2b,
GO:0002819	regulation of adaptive im	0.00576 ( 13 of 2257 genes )	0.00309 ( 105 of 34011 annotated genes )	0.007894	1	Pvr, Fcgr2b, Pnp, Fcgr3, Tap1, Ripk2, Tnf, Gimap5, Xcl1, Ccr7, Ppp3cb, Cd44, Mif,
GO:0051258	protein polymerization	0.00709 ( 16 of 2257 genes )	0.00415 ( 141 of 34011 annotated genes )	0.007994	1	Tmsb10, Mtap1b, Nck1, Tuba8, Add2, Rhoa, Vdac2, Prex1, Epb4.9, Diap1, Fgg, Nphs1, Ccl24, Gsn, Cenpj, Tubb5,
GO:0006812	cation transport	0.02525 ( 57 of 2257 genes )	0.02076 ( 706 of 34011 annotated genes )	0.007997	1	Scn1b, Accn3, Slc30a6, Cox6c, Psen1, Ywhah, Ccl4, Atp10a, Xcl1, Atp6v0c, Atp2b4, Slc38a11, Slc31a1, Rest, Cysltr1, Atp5b, Atp11a, Cnksr3, Slc22a4, Trpm2, Atp5o, Zdhhc17, Atp5f1, Calca, Atp1b3, Sfxn1, Plcb4, Kcne3, Slc12a4, Rhag, Tspo, Magt1, Grin3a, Slc39a10, Homer1, Ap3b1, Fkbp1a, Ccr1, Kcnb1, Gimap5, Kcnj2, Slc23a2, Crh, Slc13a1, Mif, Diap1, Scn2a1, Gja1, Trdn, P2rx1, Camk2g, Cxcl1, Vip, Slc44a…
GO:0070098	chemokine-mediated signal	0.00266 ( 6 of 2257 genes )	0.00091 ( 31 of 34011 annotated genes )	0.008032	1	Ccr1, Ccrl2, Cxcr7, Robo1, Ccr7, Cx3cr1,
GO:0002687	positive regulation of le	0.00399 ( 9 of 2257 genes )	0.00179 ( 61 of 34011 annotated genes )	0.008364	1	Tlr2, Cmklr1, Ccr1, Xcl1, Ccr7, Adam8, Icam1, Cx3cl1, Edn1,
GO:0019882	antigen processing and pr	0.00399 ( 9 of 2257 genes )	0.00179 ( 61 of 34011 annotated genes )	0.008364	1	Thbs1, Fcgr2b, Psme2, Ap3b1, Fcgr3, Psme1, Tap1, Ccr7, Icam1,
GO:0009893	positive regulation of me	0.05361 ( 121 of 2257 genes )	0.04934 ( 1678 of 34011 annotated genes )	0.008369	1	Nfe2l2, Kdm3a, Pcbd2, Med14, Nck1, Dab2, Tnfrsf1b, Psen1, Ywhah, Mir133b, Ets2, Cd44, Hsp90aa1, Cyr61, Osm, Rest, Cd38, Chi3l1, Ripk2, Ppp2r5d, Tnf, Pou3f2, Armcx3, Tspo, Adam9, Il2rg, Psmd10, Nfkb1, Nupr1, Rnf180, Lhx5, Nr5a2, Prpf6, Tnfaip1, Dab2ip, Fcgr3, Nampt, 0610031J06Rik, Apoe, Nlrc5, Abca1, Stat1, Mir135a-2, Smad1, Adam8, Tmem173, Pafah1b2, Rfx6, Rps6ka4, Tceb1, Il1a, Rbpj, Ldlr, 2700060…
GO:0007162	negative regulation of ce	0.00487 ( 11 of 2257 genes )	0.00244 ( 83 of 34011 annotated genes )	0.008499	1	Thbs1, Myo1f, Jam2, Lamb1, Lgals1, Rnd1, Dact2, Arhgap6, Adam8, Atp5b, Map2k1,
GO:0019752	carboxylic acid metabolic	0.02437 ( 55 of 2257 genes )	0.01999 ( 680 of 34011 annotated genes )	0.008746	1	Ctps, Acly, Suclg1, Aadat, Degs1, Csgalnact1, Bbox1, Tmem195, Scd2, Ldha, Mthfd1, Fasn, Elovl3, Cnr1, Agxt, Slc22a4, Kynu, Acsm2, Hif1a, Aldh1a1, Acmsd, Acot2, Elovl2, Hars, Prkab1, Crat, Gmps, Hibadh, Hpgd, Mthfd1l, Mdh2, Insig2, Nr5a2, Ch25h, Aldh18a1, Acsl5, Lao1, BC026590, Pla2g2a, Sc4mol, Slc23a2, Ptgr1, Mif, Hdc, Bckdk, Tdo2, Cd34, Pgcp, Lgsn, Pkm2, Rars, Far1, Ggh, Cs, Edn1,
GO:0043436	oxoacid metabolic process	0.02437 ( 55 of 2257 genes )	0.01999 ( 680 of 34011 annotated genes )	0.008746	1	Ctps, Acly, Suclg1, Aadat, Degs1, Csgalnact1, Bbox1, Tmem195, Scd2, Ldha, Mthfd1, Fasn, Elovl3, Cnr1, Agxt, Slc22a4, Kynu, Acsm2, Hif1a, Aldh1a1, Acmsd, Acot2, Elovl2, Hars, Prkab1, Crat, Gmps, Hibadh, Hpgd, Mthfd1l, Mdh2, Insig2, Nr5a2, Ch25h, Aldh18a1, Acsl5, Lao1, BC026590, Pla2g2a, Sc4mol, Slc23a2, Ptgr1, Mif, Hdc, Bckdk, Tdo2, Cd34, Pgcp, Lgsn, Pkm2, Rars, Far1, Ggh, Cs, Edn1,
GO:0035335	peptidyl-tyrosine dephosp	0.00310 ( 7 of 2257 genes )	0.00121 ( 41 of 34011 annotated genes )	0.008747	1	Ubash3b, Ptpn11, Ptpn12, Ptpn1, Mtm1, Ptpn13, Dusp6,
GO:0006012	galactose metabolic proce	0.00133 ( 3 of 2257 genes )	0.00024 ( 8 of 34011 annotated genes )	0.008804	1	Glb1, Galk2, Pgm2,
GO:0009134	nucleoside diphosphate ca	0.00133 ( 3 of 2257 genes )	0.00024 ( 8 of 34011 annotated genes )	0.008804	1	Nudt9, Entpd7, Entpd1,
GO:0010759	positive regulation of ma	0.00133 ( 3 of 2257 genes )	0.00024 ( 8 of 34011 annotated genes )	0.008804	1	Ccr7, Cx3cl1, Cmklr1,
GO:0031622	positive regulation of fe	0.00133 ( 3 of 2257 genes )	0.00024 ( 8 of 34011 annotated genes )	0.008804	1	Il1b, Cnr1, Tnf,
GO:0032456	endocytic recycling	0.00133 ( 3 of 2257 genes )	0.00024 ( 8 of 34011 annotated genes )	0.008804	1	Snx4, Ehd2, Ehd1,
GO:0046146	tetrahydrobiopterin metab	0.00133 ( 3 of 2257 genes )	0.00024 ( 8 of 34011 annotated genes )	0.008804	1	Qdpr, Gch1, Pcbd2,
GO:0046185	aldehyde catabolic proces	0.00133 ( 3 of 2257 genes )	0.00024 ( 8 of 34011 annotated genes )	0.008804	1	Gpi1, Agxt, Aldh3b1,
GO:0060379	cardiac muscle cell myobl	0.00133 ( 3 of 2257 genes )	0.00024 ( 8 of 34011 annotated genes )	0.008804	1	Tbx2, Rbpj, Rest,
GO:0070486	leukocyte aggregation	0.00133 ( 3 of 2257 genes )	0.00024 ( 8 of 34011 annotated genes )	0.008804	1	Il1b, Cd44, Adam8,
GO:0009059	macromolecule biosyntheti	0.10235 ( 231 of 2257 genes )	0.10073 ( 3426 of 34011 annotated genes )	0.008813	1	Nfe2l2, Mcm3, 4930447C04Rik, Sbno2, Ywhah, Ets2, Xcl1, Denr, Chst11, Eif4e, Rest, Tada2a, Gspt1, Jmjd6, Ikbkap, Eif3k, Zfp516, Nfkb1, Lhx5, Prpf6, Papd7, Nr5a2, Npas3, Dab2ip, 0610031J06Rik, Foxn3, Nlrc5, Abca1, Stat1, Adam8, Tfdp2, Pycard, Rps6ka4, Tceb1, Rpn1, Il1a, Rnf141, Rbpj, Chaf1b, Rplp1, 2700060E02Rik, Nr1i2, Lrrfip1, Fech, Snx6, Rnf4, Mrpl23, Hivep1, Plagl1, Edn1, Tlr2, St3gal5, Nedd8, …
GO:0006417	regulation of translation	0.00798 ( 18 of 2257 genes )	0.00494 ( 168 of 34011 annotated genes )	0.00916	1	Eif3b, Nck1, Eif2s1, Caprin1, Sarnp, Igf2bp2, Pa2g4, Mapkapk5, Eif4e, Thbs1, Ppp1r15b, Rps5, Tnf, Ncbp2, Igf2bp3, Fech, Eif3k, Prkca,
GO:0042180	cellular ketone metabolic	0.02525 ( 57 of 2257 genes )	0.02091 ( 711 of 34011 annotated genes )	0.009167	1	Ctps, Acly, Suclg1, Aadat, Degs1, Csgalnact1, Bbox1, Tmem195, Scd2, Ldha, Mthfd1, Fasn, Elovl3, Cnr1, Agxt, Slc22a4, Coq5, Kynu, Acsm2, Hif1a, Aldh1a1, Acmsd, Acot2, Elovl2, Hars, Prkab1, Crat, Gmps, Hibadh, Hpgd, Mthfd1l, Mdh2, Insig2, Nr5a2, Ch25h, Hmgcr, Aldh18a1, Acsl5, Lao1, BC026590, Pla2g2a, Sc4mol, Slc23a2, Ptgr1, Mif, Hdc, Bckdk, Tdo2, Cd34, Pgcp, Lgsn, Pkm2, Rars, Far1, Ggh, Cs, Edn1,
GO:0001937	negative regulation of en	0.00222 ( 5 of 2257 genes )	0.00068 ( 23 of 34011 annotated genes )	0.00922	1	Thbs1, Xdh, Stat1, Aimp1, Apoe,
GO:0006911	phagocytosis, engulfment	0.00222 ( 5 of 2257 genes )	0.00068 ( 23 of 34011 annotated genes )	0.00922	1	Clec7a, Abca1, Thbs1, Fcgr2b, Fcgr3,
GO:0032770	positive regulation of mo	0.00177 ( 4 of 2257 genes )	0.00044 ( 15 of 34011 annotated genes )	0.009264	1	Il1b, Tnf, Gch1, Apoe,
GO:0048247	lymphocyte chemotaxis	0.00177 ( 4 of 2257 genes )	0.00044 ( 15 of 34011 annotated genes )	0.009264	1	Ccr7, Xcl1, Adam8, Cx3cl1,
GO:0021987	cerebral cortex developme	0.00399 ( 9 of 2257 genes )	0.00182 ( 62 of 34011 annotated genes )	0.009292	1	Srgap2, Ndel1, Hif1a, Psen1, Pou3f2, Robo1, Emx2, Cx3cr1, Lrp8,
GO:0031398	positive regulation of pr	0.00399 ( 9 of 2257 genes )	0.00182 ( 62 of 34011 annotated genes )	0.009292	1	Sumo3, Fkbp1a, Smurf1, Ripk2, Aimp2, Ube2n, Commd1, Dnaja3, Psmd10,
GO:0042312	regulation of vasodilatio	0.00266 ( 6 of 2257 genes )	0.00094 ( 32 of 34011 annotated genes )	0.009409	1	Kdr, Calca, Vip, P2ry2, Adm, Hmgcr,
GO:0009615	response to virus	0.00753 ( 17 of 2257 genes )	0.00459 ( 156 of 34011 annotated genes )	0.00946	1	Bnip3, Clec5a, Xcl1, Lyst, Tmem173, Bcl2l1, Pycard, Isg15, Ddx1, Cd86, Cxcl9, Ifit1, Tnf, Itgax, Ace2, Ifit2, Oas1a,
GO:0071843	cellular component biogen	0.00975 ( 22 of 2257 genes )	0.00647 ( 220 of 34011 annotated genes )	0.00948	1	Pin4, Prpf6, Rps2, 0610007P22Rik, Rpl5, Pdcd11, Pa2g4, Ddx56, Rrp1b, Fbl, Dkc1, Bysl, Rrs1, Wdr12, Nop10, Mphosph6, Brix1, Prpf31, Dimt1, Tbl3, Pop4, Exoc4,
GO:0022613	ribonucleoprotein complex	0.00930 ( 21 of 2257 genes )	0.00609 ( 207 of 34011 annotated genes )	0.009488	1	Pin4, Prpf6, Rps2, 0610007P22Rik, Rpl5, Pdcd11, Pa2g4, Ddx56, Rrp1b, Fbl, Dkc1, Bysl, Rrs1, Wdr12, Nop10, Mphosph6, Brix1, Prpf31, Dimt1, Tbl3, Pop4,
GO:0006470	protein dephosphorylation	0.00709 ( 16 of 2257 genes )	0.00423 ( 144 of 34011 annotated genes )	0.00971	1	Ppap2a, Ptpn11, Ptpn12, Dusp19, Ptpn1, Ywhab, Ptpn23, Ppp2r5a, Dusp12, Ubash3b, Ppp3cb, Dupd1, Mtm1, Ptpn13, Ptpn2, Dusp6,
GO:0000244	assembly of spliceosomal	0.00089 ( 2 of 2257 genes )	0.00009 ( 3 of 34011 annotated genes )	0.00974	1	Prpf6, Prpf31,
GO:0002693	positive regulation of ce	0.00089 ( 2 of 2257 genes )	0.00009 ( 3 of 34011 annotated genes )	0.00974	1	Icam1, Adam8,
GO:0007132	meiotic metaphase I	0.00089 ( 2 of 2257 genes )	0.00009 ( 3 of 34011 annotated genes )	0.00974	1	Myh9, Fmn2,
GO:0009137	purine nucleoside diphosp	0.00089 ( 2 of 2257 genes )	0.00009 ( 3 of 34011 annotated genes )	0.00974	1	Nudt9, Entpd1,
GO:0009181	purine ribonucleoside dip	0.00089 ( 2 of 2257 genes )	0.00009 ( 3 of 34011 annotated genes )	0.00974	1	Nudt9, Entpd1,
GO:0009256	10-formyltetrahydrofolate	0.00089 ( 2 of 2257 genes )	0.00009 ( 3 of 34011 annotated genes )	0.00974	1	Mthfd1l, Aldh1l2,
GO:0016926	protein desumoylation	0.00089 ( 2 of 2257 genes )	0.00009 ( 3 of 34011 annotated genes )	0.00974	1	Senp6, Senp1,
GO:0019388	galactose catabolic proce	0.00089 ( 2 of 2257 genes )	0.00009 ( 3 of 34011 annotated genes )	0.00974	1	Glb1, Pgm2,
GO:0031666	positive regulation of li	0.00089 ( 2 of 2257 genes )	0.00009 ( 3 of 34011 annotated genes )	0.00974	1	Prkca, Mif,
GO:0032829	regulation of CD4-positiv	0.00089 ( 2 of 2257 genes )	0.00009 ( 3 of 34011 annotated genes )	0.00974	1	Gimap5, Il2rg,
GO:0032831	positive regulation of CD	0.00089 ( 2 of 2257 genes )	0.00009 ( 3 of 34011 annotated genes )	0.00974	1	Gimap5, Il2rg,
GO:0033029	regulation of neutrophil	0.00089 ( 2 of 2257 genes )	0.00009 ( 3 of 34011 annotated genes )	0.00974	1	Niacr1, Cd44,
GO:0033031	positive regulation of ne	0.00089 ( 2 of 2257 genes )	0.00009 ( 3 of 34011 annotated genes )	0.00974	1	Niacr1, Cd44,
GO:0034238	macrophage fusion	0.00089 ( 2 of 2257 genes )	0.00009 ( 3 of 34011 annotated genes )	0.00974	1	Cd44, Adam9,
GO:0042494	detection of bacterial li	0.00089 ( 2 of 2257 genes )	0.00009 ( 3 of 34011 annotated genes )	0.00974	1	Tlr2, Tlr1,
GO:0043400	cortisol secretion	0.00089 ( 2 of 2257 genes )	0.00009 ( 3 of 34011 annotated genes )	0.00974	1	Ptpn11, Crh,
GO:0046813	virion attachment, bindin	0.00089 ( 2 of 2257 genes )	0.00009 ( 3 of 34011 annotated genes )	0.00974	1	Ace2, Icam1,
GO:0051462	regulation of cortisol se	0.00089 ( 2 of 2257 genes )	0.00009 ( 3 of 34011 annotated genes )	0.00974	1	Ptpn11, Crh,
GO:0060559	positive regulation of ca	0.00089 ( 2 of 2257 genes )	0.00009 ( 3 of 34011 annotated genes )	0.00974	1	Il1b, Tnf,
GO:0070340	detection of bacterial li	0.00089 ( 2 of 2257 genes )	0.00009 ( 3 of 34011 annotated genes )	0.00974	1	Tlr2, Tlr1,
GO:0070487	monocyte aggregation	0.00089 ( 2 of 2257 genes )	0.00009 ( 3 of 34011 annotated genes )	0.00974	1	Il1b, Cd44,
GO:0071224	cellular response to pept	0.00089 ( 2 of 2257 genes )	0.00009 ( 3 of 34011 annotated genes )	0.00974	1	Ripk2, Tlr2,
GO:0009206	purine ribonucleoside tri	0.00354 ( 8 of 2257 genes )	0.00153 ( 52 of 34011 annotated genes )	0.009831	1	Nme4, Atp5f1, Pnp, Nme5, Aldoa, Pkm2, Atp5o, Atp5b,
GO:0046209	nitric oxide metabolic pr	0.00354 ( 8 of 2257 genes )	0.00153 ( 52 of 34011 annotated genes )	0.009831	1	Tlr2, Cd34, Il1b, Tnf, Gimap5, Hsp90aa1, Tspo, Icam1,
GO:0007275	multicellular organismal	0.10589 ( 239 of 2257 genes )	0.10479 ( 3564 of 34011 annotated genes )	0.009834	1	Nfe2l2, Anpep, Scn1b, Mapkapk2, 4930447C04Rik, Ywhah, Asz1, Mir133b, Ccr7, Catsperb, Csrp3, Chst11, Hsp90aa1, Rest, Cysltr1, Szt2, Gpi1, Ttn, Mtl5, Lamb1, Lgals1, Psmc4, Chi3l1, Bglap, Aldh1a1, Jmjd6, Dact2, Slc4a7, Tspo, Nfkb1, Ppia, Nupr1, Ptpn11, Lhx5, Grin3a, Dab2ip, Foxn3, Hmgcr, Crip2, Stat1, Tmem2, Adam8, P2ry2, Emx2, Myl6, Mmp19, Il1a, Erap1, Rbpj, Rgs6, Myo3a, Pkm2, Nphs1, Adam24, Fech, …
GO:0045859	regulation of protein kin	0.01817 ( 41 of 2257 genes )	0.01417 ( 482 of 34011 annotated genes )	0.009878	1	Prlr, Psen1, Ccr7, Tnik, Cyr61, Dusp6, Thbs1, Stk3, Dusp19, Ttn, Akap13, Chi3l1, Dgkh, Tnf, Calca, Mapksp1, Agk, Adam9, Tlr1, Psmd10, Dnajc3, Csf1, Pdgfa, Ptpn11, Dab2ip, Apoe, Hmgcr, Adam8, Spred2, Lrp8, Mif, Cish, Il1b, Gnai2, Ccnh, Rap2c, Kit, Dnaja3, Edn1, Map2k1, Prkca,
GO:0042110	T cell activation	0.01241 ( 28 of 2257 genes )	0.00885 ( 301 of 34011 annotated genes )	0.00992	1	Socs6, Psmb10, Pnp, Nck1, Ap3b1, Pdcd1lg2, Cd47, Fkbp1a, Psen1, Gimap5, Ccr7, Hsp90aa1, Myh9, Adam8, Cd59b, Cd86, Ddost, Cd209a, Lgals1, Ripk2, Il1b, Jmjd6, Ppp3cb, Icam1, Kit, Dnaja3, Il2rg, Zfp36l2,
GO:0034470	ncRNA processing	0.00886 ( 20 of 2257 genes )	0.00573 ( 195 of 34011 annotated genes )	0.009965	1	Pin4, 0610007P22Rik, Rpl5, Pdcd11, Pa2g4, Ddx56, Rrp1b, Fbl, Tsen2, Dkc1, Nsun2, Lin28b, Wdr12, Nop10, Mphosph6, Dimt1, Qtrtd1, Tbl3, Ints8, Pop4,
GO:0016042	lipid catabolic process	0.00930 ( 21 of 2257 genes )	0.00612 ( 208 of 34011 annotated genes )	0.009993	1	Ddhd1, Prdx6, Apoe, Ywhah, Smpdl3b, Gimap5, Acsl5, Pla2g2a, Pafah1b2, Pld2, Pla2g2d, Cnr1, Lipf, Niacr1, Ldlr, Ppt1, Il1b, Tnf, Plbd1, Acot2, Pla2g16,
GO:0030001	metal ion transport	0.02127 ( 48 of 2257 genes )	0.01714 ( 583 of 34011 annotated genes )	0.01004	1	Scn1b, Accn3, Slc30a6, Psen1, Ywhah, Ccl4, Xcl1, Atp2b4, Slc38a11, Slc31a1, Rest, Cysltr1, Cnksr3, Slc22a4, Trpm2, Zdhhc17, Calca, Atp1b3, Sfxn1, Plcb4, Kcne3, Slc12a4, Tspo, Magt1, Grin3a, Slc39a10, Homer1, Ap3b1, Fkbp1a, Ccr1, Kcnb1, Gimap5, Kcnj2, Slc23a2, Crh, Slc13a1, Mif, Diap1, Scn2a1, Gja1, Trdn, P2rx1, Camk2g, Cxcl1, Vip, Slc31a2, Icam1, Slc9a10,
GO:0070838	divalent metal ion transp	0.01196 ( 27 of 2257 genes )	0.00847 ( 288 of 34011 annotated genes )	0.01015	1	Magt1, Grin3a, Ap3b1, Homer1, Slc39a10, Slc30a6, Fkbp1a, Psen1, Ccr1, Ccl4, Gimap5, Kcnj2, Xcl1, Atp2b4, Crh, Rest, Cysltr1, Diap1, Gja1, Trdn, P2rx1, Trpm2, Camk2g, Zdhhc17, Calca, Icam1, Tspo,
GO:0022607	cellular component assemb	0.04253 ( 96 of 2257 genes )	0.03831 ( 1303 of 34011 annotated genes )	0.01026	1	Tmsb10, Pcbd2, Nck1, Tuba8, Nudt21, Prdx6, Psen1, Atg13, Ccr7, Arhgap6, Hsp90aa1, Aldh1a7, Ehd1, Capg, Ttn, Tex11, Senp6, Dgkh, Ndufs4, Gsn, Tnf, Aldh1a1, Plod3, Psmd10, Birc2, Nupr1, Gch1, Prpf6, Rps2, Tnfaip1, Tln1, Apoe, Hmgcr, Kcnb1, Abca1, Add2, Rhoa, Smad1, Plek, Kif3b, Cyfip1, Diap1, Chaf1b, Tmed10, Cd34, Myo3a, Rab8a, Prpf31, Nphs1, Snap23, Cenpj, Myo1b, Fech, Dpysl3, Rnf4, Dnaja3, Syce1,…
GO:0051046	regulation of secretion	0.01595 ( 36 of 2257 genes )	0.01214 ( 413 of 34011 annotated genes )	0.01047	1	Tlr2, Psg22, Ccr7, Acvr2a, Osm, Rest, Cnr1, Ica1, Niacr1, Casp1, Cd38, Clec4n, Tnf, Ppp3cb, Rab3c, Bcr, Adam9, Dpysl2, Ptpn11, Clec5a, Clec4e, Hmgcr, P2ry2, Rfx6, Crh, Pycard, Pld2, Mif, Il1a, Nphs1, Il1b, Snap23, Cd14, Cx3cl1, Edn1, Prkca,
GO:0051099	positive regulation of bi	0.00975 ( 22 of 2257 genes )	0.00653 ( 222 of 34011 annotated genes )	0.01047	1	Tlr2, Fkbp1a, Fzd1, Add2, Eno1, Adam8, Tmem173, Mtpn, Cytl1, Lrp8, Pycard, Txn1, Psma6, Epb4.1, Il1b, Ripk2, Tnf, Ager, Icam1, Ube2n, Kit, Ppap2b,
GO:0006898	receptor-mediated endocyt	0.00532 ( 12 of 2257 genes )	0.00285 ( 97 of 34011 annotated genes )	0.01052	1	Dab2, Apoe, Ppt1, Gria2, Calca, Ccr7, Grk4, Adm, Atp5b, Pld2, Sgip1, Prkca,
GO:0070371	ERK1 and ERK2 cascade	0.00665 ( 15 of 2257 genes )	0.00391 ( 133 of 34011 annotated genes )	0.01057	1	Kdr, Pdgfa, Il1a, Cnksr3, A430084P05Rik, Hmgcr, Chi3l1, Ccr1, Ripk2, Il1b, Cd44, Cyr61, Prkca, Dusp6, Mif,
GO:0051222	positive regulation of pr	0.00753 ( 17 of 2257 genes )	0.00465 ( 158 of 34011 annotated genes )	0.01067	1	Tlr2, Clec5a, Clec4e, Psg22, Tmem30a, Ccr7, Hsp90aa1, Tmem173, Pycard, Mif, Il1a, Casp1, Clec4n, Il1b, Tnf, Cd14, Adam9,
GO:0046638	positive regulation of al	0.00266 ( 6 of 2257 genes )	0.00097 ( 33 of 34011 annotated genes )	0.01095	1	Ripk2, Gimap5, Pnp, Ccr7, Ap3b1, Il2rg,
GO:0007033	vacuole organization	0.00354 ( 8 of 2257 genes )	0.00156 ( 53 of 34011 annotated genes )	0.011	1	Psen1, Abca1, Ppt1, Chmp5, Atg13, Lyst, Atp6v0c, Mtm1,
GO:0009145	purine nucleoside triphos	0.00354 ( 8 of 2257 genes )	0.00156 ( 53 of 34011 annotated genes )	0.011	1	Nme4, Atp5f1, Pnp, Nme5, Aldoa, Pkm2, Atp5o, Atp5b,
GO:0002253	activation of immune resp	0.00842 ( 19 of 2257 genes )	0.00541 ( 184 of 34011 annotated genes )	0.01102	1	Clec7a, Tlr2, Mapkapk2, Psen1, Ccr7, Adam8, C5ar1, Tmem173, Pycard, Tnip3, Cd86, Cd59b, Cd38, C9, Trim30a, Ripk2, Ube2n, Fcnb, Cfp,
GO:0001914	regulation of T cell medi	0.00222 ( 5 of 2257 genes )	0.00071 ( 24 of 34011 annotated genes )	0.0111	1	Pvr, Pnp, Xcl1, Ppp3cb, Tap1,
GO:0015893	drug transport	0.00222 ( 5 of 2257 genes )	0.00071 ( 24 of 34011 annotated genes )	0.0111	1	Abcg2, Tlr2, Slco1b2, Abcb1b, Nr1i2,
GO:0043330	response to exogenous dsR	0.00222 ( 5 of 2257 genes )	0.00071 ( 24 of 34011 annotated genes )	0.0111	1	Ripk2, Ddx1, Ifit1, Stat1, Tmem173,
GO:0016311	dephosphorylation	0.01241 ( 28 of 2257 genes )	0.00894 ( 304 of 34011 annotated genes )	0.01124	1	Ppef1, Ppap2a, Ptpn11, Ptpn1, Mki67ip, Farp1, Ywhab, Fkbp1a, Mtmr9, Ppp2r5a, Dusp12, Ubash3b, Tmem225, Dupd1, Plek, Rrp1b, Ptpn2, Dusp6, Ppp1r15b, Ptpn12, Dusp19, Ptpn23, Inpp5b, Tnf, Ppp3cb, Mtm1, Ptpn13, Ppap2b,
GO:0042116	macrophage activation	0.00310 ( 7 of 2257 genes )	0.00126 ( 43 of 34011 annotated genes )	0.01134	1	Thbs1, Jmjd6, Tlr2, Casp1, Cx3cr1, Tlr1, Sbno2,
GO:0032946	positive regulation of mo	0.00532 ( 12 of 2257 genes )	0.00288 ( 98 of 34011 annotated genes )	0.01137	1	Cd59b, Cd86, Csf1, Pnp, Nck1, Cd38, Pdcd1lg2, Ripk2, Il1b, Ccr7, Dnaja3, Mif,
GO:0042310	vasoconstriction	0.00399 ( 9 of 2257 genes )	0.00188 ( 64 of 34011 annotated genes )	0.01138	1	P2rx1, Cd38, Hif1a, Icam1, Adm, Cx3cl1, Edn1, Map2k1, Cysltr1,
GO:0060341	regulation of cellular lo	0.02082 ( 47 of 2257 genes )	0.01685 ( 573 of 34011 annotated genes )	0.01146	1	Tlr2, Psg22, Ppp2r5a, Rangap1, Ccr7, Acvr2a, Hsp90aa1, Osm, Rest, Txn1, Cnr1, Ica1, Niacr1, Casp1, Cd38, Clec4n, Tnf, Ppp3cb, Rab3c, Bcr, Adam9, Dpysl2, Psmd10, Ptpn11, Mtap1b, Dab2ip, Clec5a, Clec4e, Tmem30a, Hmgcr, Fzd1, Tmem173, Bcl2l1, Rfx6, Crh, Pycard, Pld2, Mif, Il1a, Trdn, Litaf, Il1b, Snap23, Cx3cl1, Cd14, Edn1, Prkca,
GO:0072511	divalent inorganic cation	0.01196 ( 27 of 2257 genes )	0.00856 ( 291 of 34011 annotated genes )	0.01154	1	Magt1, Grin3a, Ap3b1, Homer1, Slc39a10, Slc30a6, Fkbp1a, Psen1, Ccr1, Ccl4, Gimap5, Kcnj2, Xcl1, Atp2b4, Crh, Rest, Cysltr1, Diap1, Gja1, Trdn, P2rx1, Trpm2, Camk2g, Zdhhc17, Calca, Icam1, Tspo,
GO:0006516	glycoprotein catabolic pr	0.00177 ( 4 of 2257 genes )	0.00047 ( 16 of 34011 annotated genes )	0.01179	1	Pion, Tmed10, Fkbp1a, Psen1,
GO:0032488	Cdc42 protein signal tran	0.00177 ( 4 of 2257 genes )	0.00047 ( 16 of 34011 annotated genes )	0.01179	1	Abca1, Ccr7, Ndel1, Apoe,
GO:0032874	positive regulation of st	0.00177 ( 4 of 2257 genes )	0.00047 ( 16 of 34011 annotated genes )	0.01179	1	Ripk2, Il1b, Il1a, Hmgcr,
GO:0034110	regulation of homotypic c	0.00177 ( 4 of 2257 genes )	0.00047 ( 16 of 34011 annotated genes )	0.01179	1	Adam8, Lgals1, Prkca, Map2k1,
GO:0042533	tumor necrosis factor bio	0.00177 ( 4 of 2257 genes )	0.00047 ( 16 of 34011 annotated genes )	0.01179	1	Thbs1, Tlr2, Fcgr3, Tlr1,
GO:0042534	regulation of tumor necro	0.00177 ( 4 of 2257 genes )	0.00047 ( 16 of 34011 annotated genes )	0.01179	1	Thbs1, Tlr2, Fcgr3, Tlr1,
GO:0051767	nitric-oxide synthase bio	0.00177 ( 4 of 2257 genes )	0.00047 ( 16 of 34011 annotated genes )	0.01179	1	Kdr, Tlr2, Nampt, Edn1,
GO:0051769	regulation of nitric-oxid	0.00177 ( 4 of 2257 genes )	0.00047 ( 16 of 34011 annotated genes )	0.01179	1	Kdr, Tlr2, Nampt, Edn1,
GO:2000193	positive regulation of fa	0.00177 ( 4 of 2257 genes )	0.00047 ( 16 of 34011 annotated genes )	0.01179	1	Il1b, Acsl5, P2ry2, Mif,
GO:0045860	positive regulation of pr	0.01285 ( 29 of 2257 genes )	0.00938 ( 319 of 34011 annotated genes )	0.01185	1	Csf1, Pdgfa, Ptpn11, Dab2ip, Prlr, Psen1, Ccr7, Adam8, Tnik, Cyr61, Lrp8, Mif, Thbs1, Stk3, Cish, Chi3l1, Il1b, Dgkh, Gnai2, Tnf, Calca, Mapksp1, Agk, Kit, Adam9, Tlr1, Edn1, Map2k1, Psmd10,
GO:0090066	regulation of anatomical	0.01994 ( 45 of 2257 genes )	0.01605 ( 546 of 34011 annotated genes )	0.01214	1	Tmsb10, Ndufs3, Nck1, Dab2, Nppa, Eno1, Cd44, Hsp90aa1, Cyr61, Mtpn, Cysltr1, Prex1, Kdr, Epb4.9, Ndel1, Cd38, Hif1a, Ppt1, Gsn, Ccl24, Calca, Plod3, Psmd10, Gch1, Nupr1, Mtap1b, Dab2ip, Apoe, Hmgcr, D7Ertd443e, Add2, Rhoa, Plek, P2ry2, Cyfip1, P2rx1, Nphs1, Vip, Mll2, Nts, Icam1, Cx3cl1, Adm, Edn1, Map2k1,
GO:0006916	anti-apoptosis	0.00930 ( 21 of 2257 genes )	0.00623 ( 212 of 34011 annotated genes )	0.01223	1	Rnf7, Bnip3, Clec5a, Nme5, Apoe, Psen1, Cflar, Fn1, Bcl2l1, Cd59b, Serpinb9, Il2rb, Tsc22d3, Il1b, Tmx1, Tnf, Api5, Pea15a, Adm, Nfkb1, Tox3,
GO:0034645	cellular macromolecule bi	0.09925 ( 224 of 2257 genes )	0.09820 ( 3340 of 34011 annotated genes )	0.01224	1	Nfe2l2, Mcm3, 4930447C04Rik, Sbno2, Ywhah, Ets2, Xcl1, Denr, Chst11, Eif4e, Rest, Tada2a, Gspt1, Jmjd6, Ikbkap, Eif3k, Zfp516, Nfkb1, Lhx5, Prpf6, Nr5a2, Npas3, Papd7, Dab2ip, 0610031J06Rik, Foxn3, Nlrc5, Abca1, Stat1, Adam8, Tfdp2, Pycard, Rps6ka4, Tceb1, Rpn1, Il1a, Rnf141, Rbpj, Chaf1b, Rplp1, 2700060E02Rik, Nr1i2, Lrrfip1, Fech, Snx6, Rnf4, Mrpl23, Hivep1, Plagl1, Edn1, Tlr2, St3gal5, Nedd8, …
GO:0032147	activation of protein kin	0.00620 ( 14 of 2257 genes )	0.00362 ( 123 of 34011 annotated genes )	0.01225	1	Prlr, Cish, Psen1, Chi3l1, Dgkh, Gnai2, Tnf, Calca, Mapksp1, Agk, Tnik, Adam9, Tlr1, Edn1,
GO:0001818	negative regulation of cy	0.00532 ( 12 of 2257 genes )	0.00291 ( 99 of 34011 annotated genes )	0.01227	1	Thbs1, Fcgr2b, Tlr2, Cd34, Trim30a, Cmklr1, Gimap5, Tnf, Xcl1, Mefv, Tspo, Nfkb1,
GO:0045582	positive regulation of T	0.00354 ( 8 of 2257 genes )	0.00159 ( 54 of 34011 annotated genes )	0.01228	1	Ripk2, Gimap5, Pnp, Ccr7, Ap3b1, Hsp90aa1, Adam8, Il2rg,
GO:0001909	leukocyte mediated cytoto	0.00399 ( 9 of 2257 genes )	0.00191 ( 65 of 34011 annotated genes )	0.01255	1	Pvr, Pnp, Fcgr3, Serpinb9, Tap1, Gimap5, Xcl1, Lyst, Ppp3cb,
GO:0006733	oxidoreduction coenzyme m	0.00399 ( 9 of 2257 genes )	0.00191 ( 65 of 34011 annotated genes )	0.01255	1	Hibadh, Mdh2, Pnp, Nampt, Coq5, Kynu, Hmgcr, Pgam1, Ldha,
GO:0042102	positive regulation of T	0.00399 ( 9 of 2257 genes )	0.00191 ( 65 of 34011 annotated genes )	0.01255	1	Cd59b, Cd86, Pnp, Nck1, Pdcd1lg2, Il1b, Ripk2, Ccr7, Dnaja3,
GO:0006183	GTP biosynthetic process	0.00133 ( 3 of 2257 genes )	0.00026 ( 9 of 34011 annotated genes )	0.01264	1	Nme4, Pnp, Nme5,
GO:0006241	CTP biosynthetic process	0.00133 ( 3 of 2257 genes )	0.00026 ( 9 of 34011 annotated genes )	0.01264	1	Ctps, Nme4, Nme5,
GO:0006568	tryptophan metabolic proc	0.00133 ( 3 of 2257 genes )	0.00026 ( 9 of 34011 annotated genes )	0.01264	1	Aadat, Tdo2, Kynu,
GO:0009136	purine nucleoside diphosp	0.00133 ( 3 of 2257 genes )	0.00026 ( 9 of 34011 annotated genes )	0.01264	1	Ak2, Guk1, Atp5b,
GO:0009180	purine ribonucleoside dip	0.00133 ( 3 of 2257 genes )	0.00026 ( 9 of 34011 annotated genes )	0.01264	1	Ak2, Guk1, Atp5b,
GO:0009437	carnitine metabolic proce	0.00133 ( 3 of 2257 genes )	0.00026 ( 9 of 34011 annotated genes )	0.01264	1	Slc22a4, Crat, Bbox1,
GO:0010758	regulation of macrophage	0.00133 ( 3 of 2257 genes )	0.00026 ( 9 of 34011 annotated genes )	0.01264	1	Ccr7, Cx3cl1, Cmklr1,
GO:0032306	regulation of prostagland	0.00133 ( 3 of 2257 genes )	0.00026 ( 9 of 34011 annotated genes )	0.01264	1	Il1b, P2ry2, Mif,
GO:0032308	positive regulation of pr	0.00133 ( 3 of 2257 genes )	0.00026 ( 9 of 34011 annotated genes )	0.01264	1	Il1b, P2ry2, Mif,
GO:0032310	prostaglandin secretion	0.00133 ( 3 of 2257 genes )	0.00026 ( 9 of 34011 annotated genes )	0.01264	1	Il1b, P2ry2, Mif,
GO:0035455	response to interferon-al	0.00133 ( 3 of 2257 genes )	0.00026 ( 9 of 34011 annotated genes )	0.01264	1	Ifit1, Ifit3, Ifit2,
GO:0045906	negative regulation of va	0.00133 ( 3 of 2257 genes )	0.00026 ( 9 of 34011 annotated genes )	0.01264	1	Cx3cl1, Adm, Hif1a,
GO:0046036	CTP metabolic process	0.00133 ( 3 of 2257 genes )	0.00026 ( 9 of 34011 annotated genes )	0.01264	1	Ctps, Nme4, Nme5,
GO:0070189	kynurenine metabolic proc	0.00133 ( 3 of 2257 genes )	0.00026 ( 9 of 34011 annotated genes )	0.01264	1	Aadat, Tdo2, Kynu,
GO:0071675	regulation of mononuclear	0.00133 ( 3 of 2257 genes )	0.00026 ( 9 of 34011 annotated genes )	0.01264	1	Ccr7, Cx3cl1, Cmklr1,
GO:0072677	eosinophil migration	0.00133 ( 3 of 2257 genes )	0.00026 ( 9 of 34011 annotated genes )	0.01264	1	Ccl24, Adam8, Ccl7,
GO:0090201	negative regulation of re	0.00133 ( 3 of 2257 genes )	0.00026 ( 9 of 34011 annotated genes )	0.01264	1	Parl, Bcl2l1, Psmd10,
GO:0007159	leukocyte cell-cell adhes	0.00266 ( 6 of 2257 genes )	0.00100 ( 34 of 34011 annotated genes )	0.01265	1	Il1b, Tnf, Calca, Cd44, Icam1, Adam8,
GO:0032760	positive regulation of tu	0.00266 ( 6 of 2257 genes )	0.00100 ( 34 of 34011 annotated genes )	0.01265	1	Clec7a, Ripk2, Ccl4, Tlr2, Ccr7, Cd14,
GO:0006006	glucose metabolic process	0.00798 ( 18 of 2257 genes )	0.00512 ( 174 of 34011 annotated genes )	0.01288	1	Hibadh, G6pd2, Hk2, Dusp12, Ldha, Mif, Pdk1, Gpi1, Aldoa, Hif1a, Pkm2, Ier3, Tnf, Bpgm, Pgk1, Pgam1, Pgm2, Aldoc,
GO:0034446	substrate adhesion-depend	0.00222 ( 5 of 2257 genes )	0.00074 ( 25 of 34011 annotated genes )	0.01322	1	D930014E17Rik, Lamc1, Srgap2, Fn1, Lamb1,
GO:0043516	regulation of DNA damage	0.00222 ( 5 of 2257 genes )	0.00074 ( 25 of 34011 annotated genes )	0.01322	1	Eef1e1, Cd44, Spred2, Psmd10, Mif,
GO:0060986	endocrine hormone secreti	0.00222 ( 5 of 2257 genes )	0.00074 ( 25 of 34011 annotated genes )	0.01322	1	Il1b, Ptpn11, Niacr1, Acvr2a, Crh,
GO:0043542	endothelial cell migratio	0.00532 ( 12 of 2257 genes )	0.00294 ( 100 of 34011 annotated genes )	0.01323	1	Kdr, Thbs1, Apoe, Csnk2b, Calca, Loxl2, Robo1, Amotl1, Myh9, Adam8, Ppap2b, Prkca,
GO:0006200	ATP catabolic process	0.00576 ( 13 of 2257 genes )	0.00329 ( 112 of 34011 annotated genes )	0.01325	1	Abcc5, Rnf213, Tap1, Atp5o, Abcb1b, Atp5f1, Atp6v0c, Hsp90aa1, Myh9, Entpd1, Rfc3, Atp5b, Psmc5,
GO:0008284	positive regulation of ce	0.02215 ( 50 of 2257 genes )	0.01829 ( 622 of 34011 annotated genes )	0.0133	1	Prl, Nck1, Pdcd1lg2, Vim, Ccr7, Cyr61, Tns3, Osm, Cd86, Kdr, Cd38, S100a13, Hif1a, Ripk2, Ndufs4, Ccl24, Tnf, Pou3f2, Tspo, Csf1, Pdgfa, Wdr77, Pnp, Lhx5, Nampt, Cd47, Crip2, Hmgcr, Stat1, Bcl2l1, Crh, Plau, Mif, Cd59b, Rbpj, Epcam, Tgm2, Il1b, Gnai2, Ager, Odc1, Vip, Tbx2, Mll2, Dnaja3, Kit, Cx3cl1, Adm, Edn1, Prkca,
GO:0033365	protein localization to o	0.01374 ( 31 of 2257 genes )	0.01029 ( 350 of 34011 annotated genes )	0.01347	1	Snupn, Bub1b, Prl, Tlr2, Dab2ip, Ipo7, Ap3b1, Sec61b, Tnpo3, Fzd1, Ipo13, l7Rn6, Txnip, Timm8a1, Hsp90aa1, Tmem173, Txn1, Kpnb1, Diap1, Srpr, Agxt, Sumo3, Kpna3, Stat3, Litaf, Il1b, Tnf, Ankrd13c, Kpna2, Kpna6, Psmd10,
GO:0019637	organophosphate metabolic	0.01063 ( 24 of 2257 genes )	0.00747 ( 254 of 34011 annotated genes )	0.01347	1	Pip5k1a, Pdgfa, Alg9, Prdx6, Mboat1, Smpdl3b, Acsl5, Pgs1, Plek, Lyst, Phex, Pla2g2a, Pld2, Pla2g2d, Pip5kl1, Pigu, Ldlr, Ip6k1, Inpp5b, Sgms2, Fdft1, Mtm1, Ppap2b, Pla2g16,
GO:0043534	blood vessel endothelial	0.00354 ( 8 of 2257 genes )	0.00162 ( 55 of 34011 annotated genes )	0.01365	1	Thbs1, Csnk2b, Robo1, Amotl1, Myh9, Adam8, Apoe, Prkca,
GO:0002250	adaptive immune response	0.00842 ( 19 of 2257 genes )	0.00556 ( 189 of 34011 annotated genes )	0.01436	1	Pnp, Fcgr3, Tap1, Rnf8, Gimap5, Xcl1, Ccr7, Lyst, Cd44, Il18bp, Mif, Fcgr2b, Pvr, Serpinb9, C9, Ripk2, Tnf, Ppp3cb, Icam1,
GO:0032611	interleukin-1 beta produc	0.00266 ( 6 of 2257 genes )	0.00103 ( 35 of 34011 annotated genes )	0.01454	1	Abca1, Il1b, Ccr7, Casp1, Mefv, Pycard,
GO:0032890	regulation of organic aci	0.00266 ( 6 of 2257 genes )	0.00103 ( 35 of 34011 annotated genes )	0.01454	1	Il1b, Thbs1, Tnf, Acsl5, P2ry2, Mif,
GO:0002833	positive regulation of re	0.00177 ( 4 of 2257 genes )	0.00050 ( 17 of 34011 annotated genes )	0.01472	1	Pvr, Xcl1, Prkca, Mif,
GO:0002863	positive regulation of in	0.00177 ( 4 of 2257 genes )	0.00050 ( 17 of 34011 annotated genes )	0.01472	1	Cnr1, Tnf, Ccr7, Fcgr3,
GO:0021799	cerebral cortex radially	0.00177 ( 4 of 2257 genes )	0.00050 ( 17 of 34011 annotated genes )	0.01472	1	Pou3f2, Srgap2, Ndel1, Lrp8,
GO:0048246	macrophage chemotaxis	0.00177 ( 4 of 2257 genes )	0.00050 ( 17 of 34011 annotated genes )	0.01472	1	Ccr7, Cx3cr1, Cx3cl1, Cmklr1,
GO:0070265	necrotic cell death	0.00177 ( 4 of 2257 genes )	0.00050 ( 17 of 34011 annotated genes )	0.01472	1	Birc2, Tnf, Cd34, Tspo,
GO:0008283	cell proliferation	0.04209 ( 95 of 2257 genes )	0.03846 ( 1308 of 34011 annotated genes )	0.0151	1	Psmb10, Nck1, Tnfrsf1b, Pdcd1lg2, Psen1, Ccr7, Chst11, Cyr61, Tns3, Osm, Rest, Stk3, Cd38, S100a13, Ripk2, Ndufs4, Tnf, Pou3f2, Fabp7, Tspo, Nupr1, Wdr77, Lhx5, Nr5a2, Dab2ip, Nampt, Cd47, Apoe, Hmgcr, Crip2, Stat1, Rhoa, Loxl2, Smad1, Slfn2, Asah2, Emx2, Bcl2l1, Il1a, Rbpj, Cd34, Cd209a, Gnai2, Aimp2, Vip, Dnaja3, Leprel1, Cx3cl1, Prkca, Edn1, Prl, Phb2, Vim, Txnip, Acvr2a, C5ar1, Cd86, Thbs1, K…
GO:0045454	cell redox homeostasis	0.00354 ( 8 of 2257 genes )	0.00165 ( 56 of 34011 annotated genes )	0.01514	1	Txn1, Pdia5, Tmx1, Txndc9, Magt1, Dnajc16, Glrx2, Txnl1,
GO:0050920	regulation of chemotaxis	0.00487 ( 11 of 2257 genes )	0.00265 ( 90 of 34011 annotated genes )	0.01518	1	Kdr, Thbs1, Cmklr1, Ccr1, Ager, Xcl1, Ccr7, Robo1, Cx3cl1, Edn1, Prkca,
GO:0070665	positive regulation of le	0.00532 ( 12 of 2257 genes )	0.00300 ( 102 of 34011 annotated genes )	0.01531	1	Cd59b, Cd86, Csf1, Pnp, Nck1, Cd38, Pdcd1lg2, Ripk2, Il1b, Ccr7, Dnaja3, Mif,
GO:0009888	tissue development	0.03810 ( 86 of 2257 genes )	0.03443 ( 1171 of 34011 annotated genes )	0.01559	1	Dsg4, Dab2, Psen1, Cd44, Csrp3, Chst11, Cyr61, Egln1, Stk3, Ttn, Tsc22d3, Pdzrn3, Bglap, Tnf, Aldh1a1, Pou3f2, Dact2, Plod3, Wdr77, Dab2ip, Vsig1, Ecsit, Foxn3, Hmgcr, Ccr1, Rhoa, Loxl2, Smad1, Plod1, Adam8, Adam15, Myl6, Flnb, Il1a, Rbpj, Pkm2, Nphs1, Aimp2, Dnaja3, Aspn, Prkca, Edn1, Prlr, Csgalnact1, Phb2, Txnip, Acvr2a, Phex, Dusp6, Hoxb13, Hspg2, Thbs1, Kdr, Gphn, Hif1a, Csnk2b, Bglap-rs1, D…
GO:0031401	positive regulation of pr	0.01374 ( 31 of 2257 genes )	0.01041 ( 354 of 34011 annotated genes )	0.01559	1	Nupr1, Pdgfa, Dab2, Fkbp1a, Psen1, Smurf1, Ppp2r5a, Fzd1, Cd44, Acvr2a, Cyr61, Lrp8, Osm, Crh, Mif, Rps6ka4, Sumo3, Chi3l1, Ripk2, Il1b, Csnk2b, Tnf, Aimp2, Rap2c, Dnaja3, Commd1, Kit, Ube2n, Ppap2b, Prkca, Psmd10,
GO:0002920	regulation of humoral imm	0.00222 ( 5 of 2257 genes )	0.00076 ( 26 of 34011 annotated genes )	0.01561	1	Cd59b, Gimap5, Tnf, Fcgr2b, Ccr7,
GO:0019884	antigen processing and pr	0.00222 ( 5 of 2257 genes )	0.00076 ( 26 of 34011 annotated genes )	0.01561	1	Fcgr2b, Psme2, Ap3b1, Fcgr3, Psme1,
GO:0030262	apoptotic nuclear change	0.00222 ( 5 of 2257 genes )	0.00076 ( 26 of 34011 annotated genes )	0.01561	1	Ppt1, Apaf1, Dnase1l3, Bnip3, Cycs,
GO:0046520	sphingoid biosynthetic pr	0.00222 ( 5 of 2257 genes )	0.00076 ( 26 of 34011 annotated genes )	0.01561	1	Sgms2, Agk, P2rx1, Lass6, Cyr61,
GO:0033674	positive regulation of ki	0.01329 ( 30 of 2257 genes )	0.01003 ( 341 of 34011 annotated genes )	0.01617	1	Csf1, Pdgfa, Ptpn11, Dab2ip, Prlr, Psen1, Dusp12, Ccr7, Adam8, Tnik, Cyr61, Lrp8, Mif, Thbs1, Stk3, Cish, Chi3l1, Dgkh, Il1b, Gnai2, Tnf, Calca, Mapksp1, Agk, Kit, Adam9, Tlr1, Edn1, Map2k1, Psmd10,
GO:0031348	negative regulation of de	0.00487 ( 11 of 2257 genes )	0.00268 ( 91 of 34011 annotated genes )	0.01639	1	Fcgr2b, Tnfrsf1b, Tap1, Apoe, Psmb4, Trafd1, Ier3, Ccr1, Ifit1, Bcr, Mefv,
GO:0001503	ossification	0.01152 ( 26 of 2257 genes )	0.00841 ( 286 of 34011 annotated genes )	0.01648	1	Csf1, Smad5, Prl, Egr2, Clec5a, Csgalnact1, Smurf1, H3f3b, Ccr1, Fzd1, Rhoa, Smad1, Acvr2a, Phex, P2ry2, Cyr61, Hspg2, Gja1, Hif1a, Ripply2, Mir217, Bglap, Tnf, Calca, Bglap-rs1, Aspn,
GO:0048731	system development	0.08950 ( 202 of 2257 genes )	0.08850 ( 3010 of 34011 annotated genes )	0.01654	1	Anpep, Scn1b, Mapkapk2, Ywhah, Mir133b, Ccr7, Csrp3, Chst11, Hsp90aa1, Rest, Cysltr1, Szt2, Gpi1, Ttn, Lamb1, Lgals1, Chi3l1, Bglap, Aldh1a1, Jmjd6, Dact2, Slc4a7, Tspo, Nfkb1, Ppia, Nupr1, Ptpn11, Lhx5, Grin3a, Dab2ip, Hmgcr, Crip2, Stat1, Adam8, P2ry2, Emx2, Myl6, Mmp19, Il1a, Erap1, Rbpj, Rgs6, Myo3a, Pkm2, Nphs1, Fech, Dpysl3, Cx3cl1, Ccl12, Edn1, Spnb1, Prl, Prlr, Psg22, Acvr2a, Phex, Tnik, …
GO:0043900	regulation of multi-organ	0.00399 ( 9 of 2257 genes )	0.00200 ( 68 of 34011 annotated genes )	0.01658	1	Cnr1, Tlr2, Ifit1, Tnf, P2ry2, Tmem173, Pycard, Mif, Prkca,
GO:0031663	lipopolysaccharide-mediat	0.00266 ( 6 of 2257 genes )	0.00106 ( 36 of 34011 annotated genes )	0.01661	1	Ripk2, Il1b, Tnf, Stat1, Prkca, Mif,
GO:0050818	regulation of coagulation	0.00354 ( 8 of 2257 genes )	0.00168 ( 57 of 34011 annotated genes )	0.01674	1	Nfe2l2, Thbs1, Pdgfa, Cd34, Apoe, Psen1, Plek, Prkca,
GO:0050886	endocrine process	0.00354 ( 8 of 2257 genes )	0.00168 ( 57 of 34011 annotated genes )	0.01674	1	Il1b, Ptpn11, Niacr1, Ace2, Acvr2a, Crh, Mif, Edn1,
GO:0060249	anatomical structure home	0.00753 ( 17 of 2257 genes )	0.00488 ( 166 of 34011 annotated genes )	0.01679	1	Ldb2, Csf1, Vps54, Vsig1, Adam8, Kdr, Fggy, Cd34, Cd38, Ctsk, Aldoa, Hif1a, Aipl1, Xdh, Pinx1, Calca, Mtm1,
GO:0050863	regulation of T cell acti	0.00798 ( 18 of 2257 genes )	0.00526 ( 179 of 34011 annotated genes )	0.0168	1	Socs6, Pnp, Nck1, Ap3b1, Pdcd1lg2, Cd47, Gimap5, Ccr7, Hsp90aa1, Adam8, Cd86, Cd59b, Cd209a, Lgals1, Il1b, Ripk2, Dnaja3, Il2rg,
GO:0043933	macromolecular complex su	0.03190 ( 72 of 2257 genes )	0.02828 ( 962 of 34011 annotated genes )	0.01727	1	Tmsb10, Pcbd2, Nck1, Tuba8, Nudt21, Hsp90aa1, Aldh1a7, Ehd1, Ttn, Senp6, Dgkh, Ndufs4, Gsn, Tnf, Aldh1a1, Psmd10, Birc2, Gch1, Nupr1, Prpf6, Rps2, Tnfaip1, Apoe, Hmgcr, Kcnb1, Abca1, Add2, Rhoa, Smad1, Plek, Diap1, Tmed10, Prpf31, Nphs1, Snap23, Cenpj, Fech, Dpysl3, Rnf4, Dnaja3, Aldoc, Clint1, Bnip3, Vwf, Prlr, Rnf8, Pomp, Lamc1, H2afz, Vdac2, Prex1, Gphn, Epb4.9, Ccl24, Prkab1, Psmg1, Mtap1b, Y…
GO:0006379	mRNA cleavage	0.00133 ( 3 of 2257 genes )	0.00029 ( 10 of 34011 annotated genes )	0.01729	1	Nudt21, Mir196a-1, Pop4,
GO:0006577	betaine metabolic process	0.00133 ( 3 of 2257 genes )	0.00029 ( 10 of 34011 annotated genes )	0.01729	1	Slc22a4, Crat, Bbox1,
GO:0009151	purine deoxyribonucleotid	0.00133 ( 3 of 2257 genes )	0.00029 ( 10 of 34011 annotated genes )	0.01729	1	Ak2, Pnp, Guk1,
GO:0009188	ribonucleoside diphosphat	0.00133 ( 3 of 2257 genes )	0.00029 ( 10 of 34011 annotated genes )	0.01729	1	Ak2, Guk1, Atp5b,
GO:0009209	pyrimidine ribonucleoside	0.00133 ( 3 of 2257 genes )	0.00029 ( 10 of 34011 annotated genes )	0.01729	1	Ctps, Nme4, Nme5,
GO:0009215	purine deoxyribonucleosid	0.00133 ( 3 of 2257 genes )	0.00029 ( 10 of 34011 annotated genes )	0.01729	1	Ak2, Pnp, Guk1,
GO:0009435	NAD biosynthetic process	0.00133 ( 3 of 2257 genes )	0.00029 ( 10 of 34011 annotated genes )	0.01729	1	Pnp, Nampt, Kynu,
GO:0010763	positive regulation of fi	0.00133 ( 3 of 2257 genes )	0.00029 ( 10 of 34011 annotated genes )	0.01729	1	Thbs1, Ager, Zfp640,
GO:0016239	positive regulation of ma	0.00133 ( 3 of 2257 genes )	0.00029 ( 10 of 34011 annotated genes )	0.01729	1	Scoc, Larp1, Pafah1b2,
GO:0031652	positive regulation of he	0.00133 ( 3 of 2257 genes )	0.00029 ( 10 of 34011 annotated genes )	0.01729	1	Il1b, Cnr1, Tnf,
GO:0045019	negative regulation of ni	0.00133 ( 3 of 2257 genes )	0.00029 ( 10 of 34011 annotated genes )	0.01729	1	Gimap5, Cd34, Tspo,
GO:0046031	ADP metabolic process	0.00133 ( 3 of 2257 genes )	0.00029 ( 10 of 34011 annotated genes )	0.01729	1	Ak2, Nudt9, Atp5b,
GO:0046113	nucleobase catabolic proc	0.00133 ( 3 of 2257 genes )	0.00029 ( 10 of 34011 annotated genes )	0.01729	1	Xdh, Dpysl3, Dpysl2,
GO:0046325	negative regulation of gl	0.00133 ( 3 of 2257 genes )	0.00029 ( 10 of 34011 annotated genes )	0.01729	1	Tnf, Pea15a, Prkca,
GO:0060333	interferon-gamma-mediated	0.00133 ( 3 of 2257 genes )	0.00029 ( 10 of 34011 annotated genes )	0.01729	1	Nlrc5, Stat1, Dnaja3,
GO:0071622	regulation of granulocyte	0.00133 ( 3 of 2257 genes )	0.00029 ( 10 of 34011 annotated genes )	0.01729	1	Ccr7, Cx3cl1, Cmklr1,
GO:0010498	proteasomal protein catab	0.00709 ( 16 of 2257 genes )	0.00453 ( 154 of 34011 annotated genes )	0.01761	1	Birc2, Psmd14, Pcnp, Socs6, Rnf180, Dab2, Tnfaip1, Sec61b, Psen1, Smurf1, Fbxl5, Rnf4, Anapc10, Commd1, Psmc5, Psmd10,
GO:0051091	positive regulation of tr	0.00709 ( 16 of 2257 genes )	0.00453 ( 154 of 34011 annotated genes )	0.01761	1	Tlr2, Fzd1, Adam8, Mtpn, Cytl1, Lrp8, Pycard, Psma6, Il1b, Ripk2, Tnf, Ager, Ube2n, Kit, Icam1, Ppap2b,
GO:0090047	positive regulation of tr	0.00709 ( 16 of 2257 genes )	0.00453 ( 154 of 34011 annotated genes )	0.01761	1	Tlr2, Fzd1, Adam8, Mtpn, Cytl1, Lrp8, Pycard, Psma6, Il1b, Ripk2, Tnf, Ager, Ube2n, Kit, Icam1, Ppap2b,
GO:0048878	chemical homeostasis	0.02747 ( 62 of 2257 genes )	0.02387 ( 812 of 34011 annotated genes )	0.01779	1	Immt, Egr2, Scn1b, Bnip3, Ckb, Pygl, Psen1, Fbxl5, Xcl1, Atp6v0c, Lyst, Csrp3, C5ar1, Ehd1, Egln1, Atp5b, Kdr, Cnr1, Cd38, Slc6a12, Hif1a, Ppt1, Ifit1, Calca, Pou3f2, Sfxn1, Rhag, Commd1, Tspo, Ptpn11, Nr5a2, Tap1, Apoe, Fkbp1a, Hmgcr, Ccr1, Abca1, Gimap5, Mir379, Afg3l2, P2ry2, Bcl2l1, Rfx6, Diap1, Scn2a1, Gja1, Trdn, P2rx1, Ldlr, Nucb2, Tgm2, Stat3, Il1b, Ager, Cxcl1, Fech, Ndrg1, Icam1, Cx3cl1…
GO:0000003	reproduction	0.02924 ( 66 of 2257 genes )	0.02567 ( 873 of 34011 annotated genes )	0.01804	1	Kdm3a, Nme5, Asz1, Cd44, Catsperb, Fmn2, Rest, Hyal5, Tbata, Antxr2, Tex11, Mtl5, Lamb1, Tnf, Adam25, Ppia, Hpgd, Nupr1, Ptpn11, Wdr77, Nr5a2, Npas3, Tap1, Tlk2, Smad1, P2ry2, Bcl2l1, Pafah1b2, Abcg2, Pebp1, Adam24, Gm14160, Slc9a10, Psg22, Prlr, Rnf8, Phb2, Ccl4, Acvr2a, Hoxb13, Kdr, Cnr1, Hif1a, Ifit1, Calca, Csf1, Ddx4, Smad5, Spata19, Fzd1, Meig1, Crh, Mif, Plau, Csn3, P2rx1, Stat3, Xdh, Inpp…
GO:0000188	inactivation of MAPK acti	0.00177 ( 4 of 2257 genes )	0.00053 ( 18 of 34011 annotated genes )	0.01808	1	Dusp19, Spred2, Prkca, Dusp6,
GO:0002720	positive regulation of cy	0.00177 ( 4 of 2257 genes )	0.00053 ( 18 of 34011 annotated genes )	0.01808	1	Gimap5, Tlr2, Xcl1, Mif,
GO:0002864	regulation of acute infla	0.00177 ( 4 of 2257 genes )	0.00053 ( 18 of 34011 annotated genes )	0.01808	1	Cnr1, Fcgr2b, Ccr7, Fcgr3,
GO:0030866	cortical actin cytoskelet	0.00177 ( 4 of 2257 genes )	0.00053 ( 18 of 34011 annotated genes )	0.01808	1	Epb4.1, Plek, Tln1, Ehd2,
GO:0071604	transforming growth facto	0.00177 ( 4 of 2257 genes )	0.00053 ( 18 of 34011 annotated genes )	0.01808	1	Xcl1, Cd34, Cx3cl1, Hif1a,
GO:0071634	regulation of transformin	0.00177 ( 4 of 2257 genes )	0.00053 ( 18 of 34011 annotated genes )	0.01808	1	Xcl1, Cd34, Cx3cl1, Hif1a,
GO:0061041	regulation of wound heali	0.00399 ( 9 of 2257 genes )	0.00203 ( 69 of 34011 annotated genes )	0.01811	1	Nfe2l2, Thbs1, Pdgfa, Cd34, Apoe, Hmgcr, Plek, Ppap2b, Prkca,
GO:0018149	peptide cross-linking	0.00222 ( 5 of 2257 genes )	0.00079 ( 27 of 34011 annotated genes )	0.01826	1	Sprr3, Thbs1, F13a1, Fn1, Tgm2,
GO:0032872	regulation of stress-acti	0.00222 ( 5 of 2257 genes )	0.00079 ( 27 of 34011 annotated genes )	0.01826	1	Ripk2, Il1b, Il1a, Hmgcr, Map2k1,
GO:0002758	innate immune response-ac	0.00354 ( 8 of 2257 genes )	0.00171 ( 58 of 34011 annotated genes )	0.01846	1	Tnip3, Clec7a, Cd86, Tlr2, Mapkapk2, Trim30a, Ripk2, Adam8,
GO:0008637	apoptotic mitochondrial c	0.00354 ( 8 of 2257 genes )	0.00171 ( 58 of 34011 annotated genes )	0.01846	1	Hk2, Rnf7, Bnip3, Parl, Fam162a, Tnfsf10, Bcl2l1, Psmd10,
GO:0043407	negative regulation of MA	0.00354 ( 8 of 2257 genes )	0.00171 ( 58 of 34011 annotated genes )	0.01846	1	Dusp19, Dab2ip, Apoe, Hmgcr, Il1b, Spred2, Dusp6, Prkca,
GO:0002220	innate immune response ac	0.00089 ( 2 of 2257 genes )	0.00012 ( 4 of 34011 annotated genes )	0.01873	1	Clec7a, Tlr2,
GO:0003056	regulation of vascular sm	0.00089 ( 2 of 2257 genes )	0.00012 ( 4 of 34011 annotated genes )	0.01873	1	P2rx1, Map2k1,
GO:0008617	guanosine metabolic proce	0.00089 ( 2 of 2257 genes )	0.00012 ( 4 of 34011 annotated genes )	0.01873	1	Pnp, Qtrtd1,
GO:0018279	protein N-linked glycosyl	0.00089 ( 2 of 2257 genes )	0.00012 ( 4 of 34011 annotated genes )	0.01873	1	Ddost, Rpn2,
GO:0019060	intracellular transport o	0.00089 ( 2 of 2257 genes )	0.00012 ( 4 of 34011 annotated genes )	0.01873	1	Ifit1, Tap1,
GO:0019062	virion attachment to host	0.00089 ( 2 of 2257 genes )	0.00012 ( 4 of 34011 annotated genes )	0.01873	1	Ace2, Icam1,
GO:0030581	symbiont intracellular pr	0.00089 ( 2 of 2257 genes )	0.00012 ( 4 of 34011 annotated genes )	0.01873	1	Ifit1, Tap1,
GO:0032650	regulation of interleukin	0.00089 ( 2 of 2257 genes )	0.00012 ( 4 of 34011 annotated genes )	0.01873	1	Calca, Casp1,
GO:0032730	positive regulation of in	0.00089 ( 2 of 2257 genes )	0.00012 ( 4 of 34011 annotated genes )	0.01873	1	Calca, Casp1,
GO:0034626	fatty acid elongation, po	0.00089 ( 2 of 2257 genes )	0.00012 ( 4 of 34011 annotated genes )	0.01873	1	Elovl3, Elovl2,
GO:0034982	mitochondrial protein pro	0.00089 ( 2 of 2257 genes )	0.00012 ( 4 of 34011 annotated genes )	0.01873	1	Afg3l2, Afg3l1,
GO:0045591	positive regulation of re	0.00089 ( 2 of 2257 genes )	0.00012 ( 4 of 34011 annotated genes )	0.01873	1	Gimap5, Il2rg,
GO:0046184	aldehyde biosynthetic pro	0.00089 ( 2 of 2257 genes )	0.00012 ( 4 of 34011 annotated genes )	0.01873	1	Gpi1, Kdm3a,
GO:0046618	drug export	0.00089 ( 2 of 2257 genes )	0.00012 ( 4 of 34011 annotated genes )	0.01873	1	Abcg2, Nr1i2,
GO:0046719	regulation of viral prote	0.00089 ( 2 of 2257 genes )	0.00012 ( 4 of 34011 annotated genes )	0.01873	1	Ifit1, Tap1,
GO:0050703	interleukin-1 alpha secre	0.00089 ( 2 of 2257 genes )	0.00012 ( 4 of 34011 annotated genes )	0.01873	1	Casp1, S100a13,
GO:0051708	intracellular protein tra	0.00089 ( 2 of 2257 genes )	0.00012 ( 4 of 34011 annotated genes )	0.01873	1	Ifit1, Tap1,
GO:0090005	negative regulation of es	0.00089 ( 2 of 2257 genes )	0.00012 ( 4 of 34011 annotated genes )	0.01873	1	Ppp2r5a, Bcl2l1,
GO:0046649	lymphocyte activation	0.01639 ( 37 of 2257 genes )	0.01308 ( 445 of 34011 annotated genes )	0.01886	1	Psmb10, Nck1, Pdcd1lg2, Rnf8, Psen1, Ccr7, Lyst, Hsp90aa1, Cd86, Ddost, Cd38, Lgals1, Ripk2, Jmjd6, Ppp3cb, Il2rg, Gapt, Socs6, Pnp, Cd47, Ap3b1, Fkbp1a, Gimap5, Myh9, Pfdn1, Adam8, Mif, Cd59b, Fcgr2b, Rbpj, Il2rb, Cd209a, Il1b, Icam1, Kit, Dnaja3, Zfp36l2,
GO:0032655	regulation of interleukin	0.00266 ( 6 of 2257 genes )	0.00109 ( 37 of 34011 annotated genes )	0.01888	1	Thbs1, Tlr2, Ccr7, Mefv, Cmklr1, Nfkb1,
GO:0043271	negative regulation of io	0.00266 ( 6 of 2257 genes )	0.00109 ( 37 of 34011 annotated genes )	0.01888	1	Cnr1, Tnf, Calca, Vip, Plcb4, Icam1,
GO:0051240	positive regulation of mu	0.01817 ( 41 of 2257 genes )	0.01479 ( 503 of 34011 annotated genes )	0.01891	1	Clec7a, Nfe2l2, Tlr2, Psen1, Ccl4, Xcl1, Ccr7, Acvr2a, Mtpn, Cysltr1, Thbs1, Kdr, Cnr1, Casp1, Cd38, Hif1a, Ripk2, Tnf, Calca, Pou3f2, Csf1, Gimap5, Adam8, P2ry2, Crh, Pycard, Mif, Plau, Il1a, Rbpj, Cd34, Il1b, Gria2, Vip, Tbx2, Icam1, Cx3cl1, Cd14, Adm, Edn1, Prkca,
GO:0048660	regulation of smooth musc	0.00487 ( 11 of 2257 genes )	0.00273 ( 93 of 34011 annotated genes )	0.01902	1	Nampt, Hif1a, Tgm2, Hmgcr, Stat1, Tnf, Ager, Vip, Cx3cl1, Edn1, Prkca,
GO:0006633	fatty acid biosynthetic p	0.00620 ( 14 of 2257 genes )	0.00382 ( 130 of 34011 annotated genes )	0.01913	1	Fasn, Acly, Elovl3, Insig2, Ch25h, Degs1, Tmem195, Scd2, Far1, Sc4mol, Elovl2, Prkab1, Edn1, Mif,
GO:0019941	modification-dependent pr	0.01152 ( 26 of 2257 genes )	0.00853 ( 290 of 34011 annotated genes )	0.0193	1	Birc2, Pcnp, Rnf180, Dub1, Dab2, Tnfaip1, Sec61b, Psen1, Smurf1, Psma3, Fbxl5, Anapc10, Tgfb1i1, Isg15, Psma6, Tceb1, Usp25, Sumo3, Psma5, Usp18, Rnf4, Ube2n, Commd1, Usp36, Psmc5, Psmd10,
GO:0000279	M phase	0.01639 ( 37 of 2257 genes )	0.01311 ( 446 of 34011 annotated genes )	0.01945	1	Bub1b, Syce2, Rnf8, Ywhah, Ruvbl1, Asz1, Ranbp1, Osm, Fmn2, Rrs1, Tex11, Senp6, Pinx1, Tnf, Rbm7, Ddx4, Papd7, Rhoa, Meig1, Myh9, Anapc10, Kif3b, Nsun2, Il1a, Cts7, Nudc, Il1b, Pebp1, Cenpj, Tubb5, Mapre2, Rnf4, Syce1, Gm14160, Map2k1, Anapc13, Edn1,
GO:0034660	ncRNA metabolic process	0.01019 ( 23 of 2257 genes )	0.00732 ( 249 of 34011 annotated genes )	0.0195	1	Pin4, 0610007P22Rik, Rpl5, Pdcd11, Pa2g4, Ddx56, Asz1, Rrp1b, Fbl, Tsen2, Dkc1, Nsun2, Lin28b, Wdr12, Nop10, Mphosph6, Rars, Dimt1, Qtrtd1, Hars, Pop4, Ints8, Tbl3,
GO:0045765	regulation of angiogenesi	0.00709 ( 16 of 2257 genes )	0.00459 ( 156 of 34011 annotated genes )	0.01966	1	Psg22, Stat1, Cx3cr1, Cysltr1, Egln1, Thbs1, Kdr, Erap1, Il1a, Cd34, Chi3l1, Ccl24, Il1b, Adm, Cx3cl1, Prkca,
GO:0045807	positive regulation of en	0.00443 ( 10 of 2257 genes )	0.00241 ( 82 of 34011 annotated genes )	0.02034	1	Clec7a, Fcgr2b, Cd47, Fcgr3, Ppt1, Ccr7, Bcr, Cd14, Pld2, Sgip1,
GO:0030278	regulation of ossificatio	0.00753 ( 17 of 2257 genes )	0.00500 ( 170 of 34011 annotated genes )	0.02072	1	Csf1, Smad5, Prl, Egr2, Smurf1, Ccr1, Smad1, Acvr2a, P2ry2, Cyr61, Gja1, Hif1a, Mir217, Bglap, Tnf, Calca, Bglap-rs1,
GO:0003300	cardiac muscle hypertroph	0.00222 ( 5 of 2257 genes )	0.00082 ( 28 of 34011 annotated genes )	0.02119	1	Nppa, Mtpn, Akap13, Prkca, Edn1,
GO:0007040	lysosome organization	0.00222 ( 5 of 2257 genes )	0.00082 ( 28 of 34011 annotated genes )	0.02119	1	Ppt1, Abca1, Chmp5, Atp6v0c, Lyst,
GO:0009167	purine ribonucleoside mon	0.00222 ( 5 of 2257 genes )	0.00082 ( 28 of 34011 annotated genes )	0.02119	1	Ak2, Guk1, Gmps, Ak4, Atic,
GO:0014897	striated muscle hypertrop	0.00222 ( 5 of 2257 genes )	0.00082 ( 28 of 34011 annotated genes )	0.02119	1	Nppa, Mtpn, Akap13, Prkca, Edn1,
GO:0043266	regulation of potassium i	0.00222 ( 5 of 2257 genes )	0.00082 ( 28 of 34011 annotated genes )	0.02119	1	Vip, Cxcl1, Plcb4, Kcne3, Mif,
GO:0051353	positive regulation of ox	0.00222 ( 5 of 2257 genes )	0.00082 ( 28 of 34011 annotated genes )	0.02119	1	Il1b, Tnf, Gch1, Apoe, Edn1,
GO:2000379	positive regulation of re	0.00222 ( 5 of 2257 genes )	0.00082 ( 28 of 34011 annotated genes )	0.02119	1	Nfe2l2, Thbs1, Xdh, Tspo, Plau,
GO:0002697	regulation of immune effe	0.00842 ( 19 of 2257 genes )	0.00579 ( 197 of 34011 annotated genes )	0.0213	1	Pnp, Tlr2, Fcgr3, Tap1, Gimap5, Xcl1, Ccr7, Tmem173, Pycard, Mif, Pld2, Cd59b, Fcgr2b, Pvr, Ifit1, Ripk2, Tnf, Ppp3cb, Bcr,
GO:0043331	response to dsRNA	0.00266 ( 6 of 2257 genes )	0.00112 ( 38 of 34011 annotated genes )	0.02134	1	Ripk2, Ddx1, Ifit1, Lin28b, Stat1, Tmem173,
GO:0072358	cardiovascular system dev	0.02481 ( 56 of 2257 genes )	0.02146 ( 730 of 34011 annotated genes )	0.02152	1	Anpep, Psg22, Psen1, Csrp3, Vcan, Cyr61, Rest, Cysltr1, Hspg2, Egln1, Dusp6, Atp5b, Gpi1, Kdr, Thbs1, Stk3, Ttn, Hif1a, Chi3l1, Ccl24, Calca, Jmjd6, Ppp3cb, Slc4a7, Alpk3, Smad5, Pdgfa, Apoe, Fkbp1a, Fzd1, Stat1, Loxl2, Ly6e, Myh9, Adam8, Sav1, Cx3cr1, Adam15, Plau, Mmp19, Il1a, Erap1, Rbpj, Gja1, Cd34, Il1b, Cdh5, Robo1, Tbx2, Cx3cl1, Ccl12, Ppap2b, Adm, Edn1, Map2k1, Prkca,
GO:0072359	circulatory system develo	0.02481 ( 56 of 2257 genes )	0.02146 ( 730 of 34011 annotated genes )	0.02152	1	Anpep, Psg22, Psen1, Csrp3, Vcan, Cyr61, Rest, Cysltr1, Hspg2, Egln1, Dusp6, Atp5b, Gpi1, Kdr, Thbs1, Stk3, Ttn, Hif1a, Chi3l1, Ccl24, Calca, Jmjd6, Ppp3cb, Slc4a7, Alpk3, Smad5, Pdgfa, Apoe, Fkbp1a, Fzd1, Stat1, Loxl2, Ly6e, Myh9, Adam8, Sav1, Cx3cr1, Adam15, Plau, Mmp19, Il1a, Erap1, Rbpj, Gja1, Cd34, Il1b, Cdh5, Robo1, Tbx2, Cx3cl1, Ccl12, Ppap2b, Adm, Edn1, Map2k1, Prkca,
GO:0051924	regulation of calcium ion	0.00620 ( 14 of 2257 genes )	0.00388 ( 132 of 34011 annotated genes )	0.02155	1	Diap1, Gja1, Homer1, P2rx1, Trdn, Fkbp1a, Ccr1, Ccl4, Gimap5, Calca, Xcl1, Icam1, Tspo, Crh,
GO:0010608	posttranscriptional regul	0.01285 ( 29 of 2257 genes )	0.00985 ( 335 of 34011 annotated genes )	0.0216	1	Eif3b, Nck1, Eif2s1, Mir153, Tnfrsf1b, Caprin1, Sarnp, Mir196a-1, Mapkapk2, Igf2bp2, D7Ertd443e, Pa2g4, Fbxo7, Mapkapk5, Eif4e, Thbs1, Rps5, Ppp1r15b, Lin28b, Tnf, Ncbp2, Fech, Igf2bp3, Dnaja3, Eif3k, Mir34c, Ppap2b, Zfp36l2, Prkca,
GO:0043632	modification-dependent ma	0.01152 ( 26 of 2257 genes )	0.00861 ( 293 of 34011 annotated genes )	0.02166	1	Birc2, Pcnp, Rnf180, Dub1, Dab2, Tnfaip1, Sec61b, Psen1, Smurf1, Psma3, Fbxl5, Anapc10, Tgfb1i1, Isg15, Psma6, Tceb1, Usp25, Sumo3, Psma5, Usp18, Rnf4, Ube2n, Commd1, Usp36, Psmc5, Psmd10,
GO:0002029	desensitization of G-prot	0.00177 ( 4 of 2257 genes )	0.00056 ( 19 of 34011 annotated genes )	0.02186	1	Calca, Grk4, Adm, Pld2,
GO:0006110	regulation of glycolysis	0.00177 ( 4 of 2257 genes )	0.00056 ( 19 of 34011 annotated genes )	0.02186	1	Pgam1, Hif1a, Mif, Ier3,
GO:0006541	glutamine metabolic proce	0.00177 ( 4 of 2257 genes )	0.00056 ( 19 of 34011 annotated genes )	0.02186	1	Ctps, Ggh, Lgsn, Gmps,
GO:0010611	regulation of cardiac mus	0.00177 ( 4 of 2257 genes )	0.00056 ( 19 of 34011 annotated genes )	0.02186	1	Mtpn, Akap13, Prkca, Edn1,
GO:0022401	negative adaptation of si	0.00177 ( 4 of 2257 genes )	0.00056 ( 19 of 34011 annotated genes )	0.02186	1	Calca, Grk4, Adm, Pld2,
GO:0034605	cellular response to heat	0.00177 ( 4 of 2257 genes )	0.00056 ( 19 of 34011 annotated genes )	0.02186	1	Hsf3, Il1a, Tcfec, l7Rn6,
GO:0043372	positive regulation of CD	0.00177 ( 4 of 2257 genes )	0.00056 ( 19 of 34011 annotated genes )	0.02186	1	Ripk2, Gimap5, Ccr7, Il2rg,
GO:0050702	interleukin-1 beta secret	0.00177 ( 4 of 2257 genes )	0.00056 ( 19 of 34011 annotated genes )	0.02186	1	Abca1, Ccr7, Casp1, Pycard,
GO:0050999	regulation of nitric-oxid	0.00177 ( 4 of 2257 genes )	0.00056 ( 19 of 34011 annotated genes )	0.02186	1	Cnr1, Gch1, Acvr2a, Apoe,
GO:0042157	lipoprotein metabolic pro	0.00443 ( 10 of 2257 genes )	0.00244 ( 83 of 34011 annotated genes )	0.02196	1	Pigu, Alg9, Zdhhc5, Nmt1, Ldlr, Aipl1, Apoe, Ppt1, Abca1, Zdhhc17,
GO:0002824	positive regulation of ad	0.00354 ( 8 of 2257 genes )	0.00176 ( 60 of 34011 annotated genes )	0.02227	1	Ripk2, Pvr, Gimap5, Tnf, Pnp, Xcl1, Fcgr3, Tap1,
GO:0033043	regulation of organelle o	0.01595 ( 36 of 2257 genes )	0.01282 ( 436 of 34011 annotated genes )	0.02229	1	Kdm3a, Tmsb10, Bnip3, Nck1, Ywhah, Ranbp1, Arhgap6, Prex1, Myo1f, Epb4.9, Parl, Senp6, Gsn, Ccl24, Tnf, Mtm1, Ube2n, Psmd10, Mtap1b, Add2, Tlk2, Rhoa, Plek, Tnfsf10, Fam162a, Anapc10, Bcl2l1, Rps6ka4, Il1a, Nphs1, Il1b, Pebp1, Cenpj, Rnf4, Map2k1, Edn1,
GO:0007186	G-protein coupled recepto	0.06159 ( 139 of 2257 genes )	0.05951 ( 2024 of 34011 annotated genes )	0.02247	1	Olfr707, Vmn1r208, Olfr821, Olfr740, Olfr325, Ccr7, Olfr196, Vmn2r105, Olfr263-ps1, Olfr1457, Cysltr1, Olfr1504, Olfr811, Darc, Olfr228, Vmn2r27, Olfr1080, Dgkh, Olfr1404, Olfr649, Olfr815, Vmn1r47, Olfr787, Olfr771, Olfr187, Vmn1r231, Olfr1246, Abca1, Olfr837, Plek, P2ry2, Olfr850, Vmn1r73, Rgs6, Olfr58, Olfr1137, Olfr1341, Cish, Gnai2, Olfr224, Tas2r136, Edn1, Olfr1051, Cxcr7, Olfr119, Olfr512,…
GO:0002923	regulation of humoral imm	0.00133 ( 3 of 2257 genes )	0.00032 ( 11 of 34011 annotated genes )	0.02276	1	Gimap5, Tnf, Fcgr2b,
GO:0009208	pyrimidine ribonucleoside	0.00133 ( 3 of 2257 genes )	0.00032 ( 11 of 34011 annotated genes )	0.02276	1	Ctps, Nme4, Nme5,
GO:0010613	positive regulation of ca	0.00133 ( 3 of 2257 genes )	0.00032 ( 11 of 34011 annotated genes )	0.02276	1	Mtpn, Prkca, Edn1,
GO:0014742	positive regulation of mu	0.00133 ( 3 of 2257 genes )	0.00032 ( 11 of 34011 annotated genes )	0.02276	1	Mtpn, Prkca, Edn1,
GO:0034377	plasma lipoprotein partic	0.00133 ( 3 of 2257 genes )	0.00032 ( 11 of 34011 annotated genes )	0.02276	1	Abca1, Fech, Apoe,
GO:0043518	negative regulation of DN	0.00133 ( 3 of 2257 genes )	0.00032 ( 11 of 34011 annotated genes )	0.02276	1	Cd44, Psmd10, Mif,
GO:0045649	regulation of macrophage	0.00133 ( 3 of 2257 genes )	0.00032 ( 11 of 34011 annotated genes )	0.02276	1	Csf1, Calca, Prkca,
GO:0048240	sperm capacitation	0.00133 ( 3 of 2257 genes )	0.00032 ( 11 of 34011 annotated genes )	0.02276	1	Calca, Pebp1, Catsperb,
GO:0071312	cellular response to alka	0.00133 ( 3 of 2257 genes )	0.00032 ( 11 of 34011 annotated genes )	0.02276	1	Tnf, Bcl2l1, Crh,
GO:0071621	granulocyte chemotaxis	0.00133 ( 3 of 2257 genes )	0.00032 ( 11 of 34011 annotated genes )	0.02276	1	Ccr7, Cx3cl1, Cmklr1,
GO:0071636	positive regulation of tr	0.00133 ( 3 of 2257 genes )	0.00032 ( 11 of 34011 annotated genes )	0.02276	1	Xcl1, Cd34, Cx3cl1,
GO:0071674	mononuclear cell migratio	0.00133 ( 3 of 2257 genes )	0.00032 ( 11 of 34011 annotated genes )	0.02276	1	Ccr7, Cx3cl1, Cmklr1,
GO:0033002	muscle cell proliferation	0.00620 ( 14 of 2257 genes )	0.00391 ( 133 of 34011 annotated genes )	0.02284	1	Rbpj, Nampt, Hif1a, Tgm2, Hmgcr, Stat1, Tnf, Ager, Vip, Tbx2, Sav1, Cx3cl1, Edn1, Prkca,
GO:0042127	regulation of cell prolif	0.03456 ( 78 of 2257 genes )	0.03140 ( 1068 of 34011 annotated genes )	0.02294	1	Nck1, Pdcd1lg2, Ccr7, Chst11, Cyr61, Tns3, Osm, Rest, Stk3, Cd38, S100a13, Ripk2, Ndufs4, Tnf, Pou3f2, Tspo, Nupr1, Wdr77, Nr5a2, Lhx5, Dab2ip, Nampt, Cd47, Apoe, Hmgcr, Crip2, Stat1, Rhoa, Smad1, Slfn2, Bcl2l1, Il1a, Rbpj, Cd209a, Gnai2, Aimp2, Vip, Dnaja3, Leprel1, Cx3cl1, Prkca, Edn1, Prl, Phb2, Vim, Txnip, Thbs1, Kdr, Cd86, Klf11, Hif1a, Ccl24, Csf1, Pdgfa, Pnp, Pla2g2a, Sav1, Crh, Mif, Plau,…
GO:0022414	reproductive process	0.02880 ( 65 of 2257 genes )	0.02555 ( 869 of 34011 annotated genes )	0.02297	1	Kdm3a, Nme5, Asz1, Cd44, Catsperb, Fmn2, Rest, Hyal5, Tbata, Antxr2, Tex11, Mtl5, Lamb1, Tnf, Adam25, Ppia, Hpgd, Nupr1, Ptpn11, Wdr77, Nr5a2, Npas3, Tap1, Tlk2, Smad1, P2ry2, Bcl2l1, Pafah1b2, Abcg2, Pebp1, Adam24, Gm14160, Slc9a10, Psg22, Prlr, Rnf8, Phb2, Ccl4, Acvr2a, Hoxb13, Kdr, Cnr1, Hif1a, Ifit1, Calca, Csf1, Ddx4, Smad5, Spata19, Fzd1, Meig1, Crh, Mif, Plau, Csn3, P2rx1, Xdh, Inpp5b, Mea…
GO:0031344	regulation of cell projec	0.01108 ( 25 of 2257 genes )	0.00826 ( 281 of 34011 annotated genes )	0.0233	1	Scn1b, Mtap1b, Caprin1, Psen1, Ywhah, Vim, Rhoa, Ccr7, Hsp90aa1, P2ry2, Tnik, Lrp8, Mif, Prex1, Cnr1, Ndel1, Myo3a, Lgals1, Il1b, Ppp2r5d, Scarf1, Pou3f2, Robo1, Dpysl3, Kit,
GO:0001936	regulation of endothelial	0.00399 ( 9 of 2257 genes )	0.00212 ( 72 of 34011 annotated genes )	0.02333	1	Kdr, Thbs1, Apoe, Xdh, Ccl24, Stat1, Vip, Aimp1, Prkca,
GO:0051090	regulation of transcripti	0.01152 ( 26 of 2257 genes )	0.00867 ( 295 of 34011 annotated genes )	0.02335	1	Tlr2, Dab2ip, Foxn3, 4930447C04Rik, Cmklr1, Nlrc5, Fzd1, Xcl1, Adam8, Mtpn, Cytl1, Lrp8, Pycard, Egln1, Psma6, Ripk2, Il1b, Tnf, Ager, Icam1, Dnaja3, Kit, Ube2n, Commd1, Ppap2b, Psmd10,
GO:0090046	regulation of transcripti	0.01152 ( 26 of 2257 genes )	0.00867 ( 295 of 34011 annotated genes )	0.02335	1	Tlr2, Dab2ip, Foxn3, 4930447C04Rik, Cmklr1, Nlrc5, Fzd1, Xcl1, Adam8, Mtpn, Cytl1, Lrp8, Pycard, Egln1, Psma6, Ripk2, Il1b, Tnf, Ager, Icam1, Dnaja3, Kit, Ube2n, Commd1, Ppap2b, Psmd10,
GO:0048659	smooth muscle cell prolif	0.00487 ( 11 of 2257 genes )	0.00282 ( 96 of 34011 annotated genes )	0.02354	1	Nampt, Hif1a, Tgm2, Hmgcr, Stat1, Tnf, Ager, Vip, Cx3cl1, Edn1, Prkca,
GO:0044057	regulation of system proc	0.01684 ( 38 of 2257 genes )	0.01373 ( 467 of 34011 annotated genes )	0.02364	1	Scn1b, Psen1, Acvr2a, Csrp3, Mtpn, Cysltr1, Kdr, Cnr1, Ica1, Niacr1, Cd38, Hif1a, Akap13, Tnf, Calca, Ptpn11, Hmgcr, Prol1, P2ry2, Crh, Lrp8, Il1a, Gja1, P2rx1, Rab8a, Nphs1, Il1b, Gnai2, Gria2, Vip, Pebp1, Icam1, Kit, Cx3cl1, Adm, Map2k1, Edn1, Prkca,
GO:0002367	cytokine production invol	0.00266 ( 6 of 2257 genes )	0.00115 ( 39 of 34011 annotated genes )	0.02402	1	Gimap5, Tnf, Tlr2, Xcl1, Kit, Mif,
GO:0010821	regulation of mitochondri	0.00266 ( 6 of 2257 genes )	0.00115 ( 39 of 34011 annotated genes )	0.02402	1	Bnip3, Parl, Tnfsf10, Fam162a, Bcl2l1, Psmd10,
GO:0032615	interleukin-12 production	0.00266 ( 6 of 2257 genes )	0.00115 ( 39 of 34011 annotated genes )	0.02402	1	Thbs1, Tlr2, Ccr7, Mefv, Cmklr1, Nfkb1,
GO:0006457	protein folding	0.00665 ( 15 of 2257 genes )	0.00432 ( 147 of 34011 annotated genes )	0.02435	1	Tor3a, Dnajc16, Aipl1, Sec63, Fkbp1a, Fkbp7, Fkbp2, Fkbp9, Cct6a, Ero1l, Tbcc, Hsp90aa1, Dnaja3, Cwc27, Dnajc3,
GO:0006839	mitochondrial transport	0.00354 ( 8 of 2257 genes )	0.00179 ( 61 of 34011 annotated genes )	0.02437	1	Ucp2, Bnip3, Atp5o, Psen1, Gimap5, Timm8a1, Hsp90aa1, Bcl2l1,
GO:0050777	negative regulation of im	0.00354 ( 8 of 2257 genes )	0.00179 ( 61 of 34011 annotated genes )	0.02437	1	Cd59b, Fcgr2b, Tap1, Psmb4, Trafd1, Ccr1, Xcl1, Ppp3cb,
GO:0009126	purine nucleoside monopho	0.00222 ( 5 of 2257 genes )	0.00085 ( 29 of 34011 annotated genes )	0.02441	1	Ak2, Guk1, Gmps, Ak4, Atic,
GO:0019674	NAD metabolic process	0.00222 ( 5 of 2257 genes )	0.00085 ( 29 of 34011 annotated genes )	0.02441	1	Mdh2, Pnp, Nampt, Kynu, Ldha,
GO:0030279	negative regulation of os	0.00222 ( 5 of 2257 genes )	0.00085 ( 29 of 34011 annotated genes )	0.02441	1	Ccr1, Calca, P2ry2, Hif1a, Smurf1,
GO:0042345	regulation of NF-kappaB i	0.00222 ( 5 of 2257 genes )	0.00085 ( 29 of 34011 annotated genes )	0.02441	1	Il1b, Tnf, Tlr2, Psmd10, Litaf,
GO:0042348	NF-kappaB import into nuc	0.00222 ( 5 of 2257 genes )	0.00085 ( 29 of 34011 annotated genes )	0.02441	1	Il1b, Tnf, Tlr2, Psmd10, Litaf,
GO:0051347	positive regulation of tr	0.01329 ( 30 of 2257 genes )	0.01038 ( 353 of 34011 annotated genes )	0.02464	1	Csf1, Pdgfa, Ptpn11, Dab2ip, Prlr, Psen1, Dusp12, Ccr7, Adam8, Tnik, Cyr61, Lrp8, Mif, Thbs1, Stk3, Cish, Chi3l1, Dgkh, Il1b, Gnai2, Tnf, Calca, Mapksp1, Agk, Kit, Adam9, Tlr1, Edn1, Map2k1, Psmd10,
GO:0033554	cellular response to stre	0.02969 ( 67 of 2257 genes )	0.02655 ( 903 of 34011 annotated genes )	0.02471	1	Nfe2l2, Higd1a, Ptpn1, Prdx6, Mapkapk2, Psen1, Ruvbl1, Atg13, Ccr7, Cd44, Stk3, Dusp19, Npepps, Ripk2, Tnf, Aldh3b1, Psmd10, Dnajc3, Nupr1, Ptpn11, Dab2ip, Epx, Hmgcr, Tlk2, Rhoa, l7Rn6, Adam8, Pafah1b2, Ppp1r15b, Il1a, Chaf1b, Slc2a1, Ltbr, Nphs1, Scoc, Tcfec, Fech, Larp1, Gm14160, Edn1, Parp2, Eif2s1, Bnip3, Rnf8, Crygd, Tnik, Cry1, Pdcd6, Ddx1, Ndel1, Obfc2a, Hif1a, Ube2n, Insig2, Pnp, D7Ertd4…
GO:0045471	response to ethanol	0.00310 ( 7 of 2257 genes )	0.00147 ( 50 of 34011 annotated genes )	0.02477	1	Cnr1, Aldh1a1, Grin3a, Ggh, Apoe, Ccl7, Prkca,
GO:0002822	regulation of adaptive im	0.00487 ( 11 of 2257 genes )	0.00285 ( 97 of 34011 annotated genes )	0.02521	1	Pvr, Fcgr2b, Pnp, Fcgr3, Tap1, Ripk2, Tnf, Gimap5, Xcl1, Ccr7, Ppp3cb,
GO:0050671	positive regulation of ly	0.00487 ( 11 of 2257 genes )	0.00285 ( 97 of 34011 annotated genes )	0.02521	1	Cd59b, Cd86, Pnp, Nck1, Cd38, Pdcd1lg2, Ripk2, Il1b, Ccr7, Dnaja3, Mif,
GO:0051656	establishment of organell	0.00399 ( 9 of 2257 genes )	0.00215 ( 73 of 34011 annotated genes )	0.02529	1	Rrs1, Rhot1, Mtap1b, Psen1, Nudc, Pinx1, Myh9, Fmn2, Map2k1,
GO:0030041	actin filament polymeriza	0.00443 ( 10 of 2257 genes )	0.00250 ( 85 of 34011 annotated genes )	0.02549	1	Prex1, Tmsb10, Diap1, Epb4.9, Nck1, Gsn, Ccl24, Nphs1, Add2, Rhoa,
GO:0043270	positive regulation of io	0.00443 ( 10 of 2257 genes )	0.00250 ( 85 of 34011 annotated genes )	0.02549	1	P2rx1, Cnksr3, Ccr1, Ccl4, Gimap5, Xcl1, Cxcl1, Tspo, Crh, Mif,
GO:0006511	ubiquitin-dependent prote	0.01108 ( 25 of 2257 genes )	0.00835 ( 284 of 34011 annotated genes )	0.0261	1	Birc2, Pcnp, Rnf180, Dub1, Dab2, Tnfaip1, Sec61b, Psen1, Smurf1, Psma3, Fbxl5, Anapc10, Tgfb1i1, Psma6, Tceb1, Usp25, Sumo3, Psma5, Usp18, Rnf4, Ube2n, Commd1, Usp36, Psmc5, Psmd10,
GO:0006482	protein demethylation	0.00177 ( 4 of 2257 genes )	0.00059 ( 20 of 34011 annotated genes )	0.0261	1	Kdm5c, Kdm3a, Ppme1, Jmjd6,
GO:0006904	vesicle docking involved	0.00177 ( 4 of 2257 genes )	0.00059 ( 20 of 34011 annotated genes )	0.0261	1	Exoc6b, Plek, Rab8a, Exoc4,
GO:0008214	protein dealkylation	0.00177 ( 4 of 2257 genes )	0.00059 ( 20 of 34011 annotated genes )	0.0261	1	Kdm5c, Kdm3a, Ppme1, Jmjd6,
GO:0010543	regulation of platelet ac	0.00177 ( 4 of 2257 genes )	0.00059 ( 20 of 34011 annotated genes )	0.0261	1	Pdgfa, Plek, Apoe, Prkca,
GO:0014743	regulation of muscle hype	0.00177 ( 4 of 2257 genes )	0.00059 ( 20 of 34011 annotated genes )	0.0261	1	Mtpn, Akap13, Prkca, Edn1,
GO:0032732	positive regulation of in	0.00177 ( 4 of 2257 genes )	0.00059 ( 20 of 34011 annotated genes )	0.0261	1	Calca, Ccr7, Casp1, Pycard,
GO:0031589	cell-substrate adhesion	0.00798 ( 18 of 2257 genes )	0.00553 ( 188 of 34011 annotated genes )	0.02615	1	Csf1, Pip5k1a, Vwf, Rhoa, Nid1, Lamc1, Arhgap6, Fn1, Adam8, Cyr61, Plau, Thbs1, Kdr, Srgap2, D930014E17Rik, Lgals1, Lamb1, Adam9,
GO:0030512	negative regulation of tr	0.00266 ( 6 of 2257 genes )	0.00118 ( 40 of 34011 annotated genes )	0.02691	1	Snx6, Chst11, Aspn, Tgfb1i1, Skor2, Smurf1,
GO:0002263	cell activation involved	0.00620 ( 14 of 2257 genes )	0.00400 ( 136 of 34011 annotated genes )	0.02707	1	Clec7a, Myo1f, Tlr2, Rnf8, Lgals1, Psen1, Sbno2, Ripk2, Ccr7, Icam1, Kit, Cx3cr1, Bcr, Pld2,
GO:0002366	leukocyte activation invo	0.00620 ( 14 of 2257 genes )	0.00400 ( 136 of 34011 annotated genes )	0.02707	1	Clec7a, Myo1f, Tlr2, Rnf8, Lgals1, Psen1, Sbno2, Ripk2, Ccr7, Icam1, Kit, Cx3cr1, Bcr, Pld2,
GO:0048869	cellular developmental pr	0.07709 ( 174 of 2257 genes )	0.07645 ( 2600 of 34011 annotated genes )	0.02728	1	Lrg1, Anpep, Psmb10, Scn1b, Ywhah, Asz1, Mir133b, Ccr7, Catsperb, Csrp3, Chst11, Hsp90aa1, Rest, Ttn, Mtl5, Lamb1, Lgals1, Gsn, Zmym4, Jmjd6, Dact2, Slc4a7, Tspo, Ppia, Ptpn11, Lhx5, Grin3a, Dab2ip, Adam8, P2ry2, Emx2, Trove2, Mmp19, Il1a, Rbpj, Rgs6, Rab8a, Nphs1, Pebp1, Adam24, Fech, Dpysl3, Slc9a10, Edn1, Bnip3, Prlr, Smurf1, Ctsl, Acvr2a, Tnik, Hspg2, Dusp6, Kdr, Cnr1, Srgap2, Ndel1, Hif1a, P…
GO:0002275	myeloid cell activation i	0.00310 ( 7 of 2257 genes )	0.00150 ( 51 of 34011 annotated genes )	0.02732	1	Myo1f, Tlr2, Bcr, Cx3cr1, Kit, Sbno2, Pld2,
GO:0030193	regulation of blood coagu	0.00310 ( 7 of 2257 genes )	0.00150 ( 51 of 34011 annotated genes )	0.02732	1	Nfe2l2, Thbs1, Pdgfa, Plek, Cd34, Apoe, Prkca,
GO:2000377	regulation of reactive ox	0.00310 ( 7 of 2257 genes )	0.00150 ( 51 of 34011 annotated genes )	0.02732	1	Nfe2l2, Thbs1, Xdh, Tspo, Trim30a, Plau, Ier3,
GO:0001906	cell killing	0.00399 ( 9 of 2257 genes )	0.00218 ( 74 of 34011 annotated genes )	0.02736	1	Pvr, Pnp, Fcgr3, Serpinb9, Tap1, Gimap5, Xcl1, Lyst, Ppp3cb,
GO:0000375	RNA splicing, via transes	0.00443 ( 10 of 2257 genes )	0.00253 ( 86 of 34011 annotated genes )	0.02739	1	Prpf6, Prpf31, Ptbp1, Prpf4, Jmjd6, Cwc15, Rbm17, Sf3a1, Lsm3, Ddx39,
GO:0006643	membrane lipid metabolic	0.00443 ( 10 of 2257 genes )	0.00253 ( 86 of 34011 annotated genes )	0.02739	1	Ppap2a, P2rx1, Lass6, Tmem195, Sgms2, Smpdl3b, Agk, Asah2, Kit, Cyr61,
GO:0010951	negative regulation of en	0.00443 ( 10 of 2257 genes )	0.00253 ( 86 of 34011 annotated genes )	0.02739	1	Serpinb11, Serpina3n, Cstb, Serpinb9, Serpinb8, Serpinh1, Prol1, Serpinb2, Serpinb3a, Serpinb3c,
GO:0048468	cell development	0.04253 ( 96 of 2257 genes )	0.03993 ( 1358 of 34011 annotated genes )	0.02749	1	Kdm3a, Scn1b, Med14, Dab2, Nme5, Psen1, Ywhah, Asz1, Mir133b, Cd44, Catsperb, Chst11, Cyr61, Rest, Ttn, Lamb1, Lgals1, Pdzrn3, Ppp2r5d, Jmjd6, Pou3f2, Rnd1, Dact2, Bpgm, Slc4a7, Tspo, Plod3, Sdc1, Dpysl2, Ptpn11, Grin3a, Dab2ip, Vsig1, Rhoa, Loxl2, P2ry2, Bcl2l1, Adam15, Cyfip1, Pld2, Diap1, Rbpj, Rgs6, Pebp1, Dpysl3, Dnaja3, Prkca, Edn1, Egr2, Klf7, Rnf8, Vim, Lamc1, Fn1, Tnik, Hoxb13, Prex1, Kd…
GO:0010604	positive regulation of ma	0.04741 ( 107 of 2257 genes )	0.04501 ( 1531 of 34011 annotated genes )	0.02755	1	Nfe2l2, Kdm3a, Pcbd2, Med14, Nck1, Dab2, Tnfrsf1b, Psen1, Ywhah, Mir133b, Ets2, Cd44, Cyr61, Osm, Rest, Cd38, Chi3l1, Ripk2, Ppp2r5d, Tnf, Pou3f2, Armcx3, Adam9, Il2rg, Psmd10, Nfkb1, Nupr1, Rnf180, Lhx5, Nr5a2, Prpf6, Tnfaip1, Dab2ip, Fcgr3, Nampt, 0610031J06Rik, Apoe, Nlrc5, Stat1, Mir135a-2, Smad1, Adam8, Tmem173, Rfx6, Rps6ka4, Tceb1, Il1a, Rbpj, 2700060E02Rik, Trim30a, Nr1i2, Aimp2, Vip, Rnf…
GO:0043388	positive regulation of DN	0.00753 ( 17 of 2257 genes )	0.00517 ( 176 of 34011 annotated genes )	0.02789	1	Tlr2, Fzd1, Adam8, Mtpn, Cytl1, Lrp8, Pycard, Txn1, Psma6, Il1b, Ripk2, Tnf, Ager, Icam1, Ube2n, Kit, Ppap2b,
GO:0006906	vesicle fusion	0.00222 ( 5 of 2257 genes )	0.00088 ( 30 of 34011 annotated genes )	0.02793	1	Stx6, Vamp8, Stx8, Rab8a, Gnai3,
GO:0014896	muscle hypertrophy	0.00222 ( 5 of 2257 genes )	0.00088 ( 30 of 34011 annotated genes )	0.02793	1	Nppa, Mtpn, Akap13, Prkca, Edn1,
GO:0002694	regulation of leukocyte a	0.01152 ( 26 of 2257 genes )	0.00882 ( 300 of 34011 annotated genes )	0.02802	1	Socs6, Pnp, Nck1, Ap3b1, Pdcd1lg2, Cd47, Gimap5, Ccr7, Lyst, Hsp90aa1, Adam8, Mif, Pld2, Cd59b, Cd86, Thbs1, Cnr1, Fcgr2b, Cd38, Cd209a, Lgals1, Ripk2, Il1b, Dnaja3, Bcr, Il2rg,
GO:0006887	exocytosis	0.00798 ( 18 of 2257 genes )	0.00559 ( 190 of 34011 annotated genes )	0.02867	1	Scamp1, Psen1, Ccr1, Plek, Rest, Pld2, Exoc6b, Myo1f, P2rx1, Rab8a, Snap23, Unc13c, Ppp3cb, Rab3c, Bcr, Kit, Prkca, Exoc4,
GO:0016070	RNA metabolic process	0.09127 ( 206 of 2257 genes )	0.09182 ( 3123 of 34011 annotated genes )	0.02879	1	Nfe2l2, Mapkapk2, 4930447C04Rik, Sbno2, Ywhah, Ddx56, Asz1, Ets2, Xcl1, Rest, Tada2a, Gspt1, Cwc15, Jmjd6, Prpf4, Ikbkap, Zfp516, Nfkb1, Lhx5, Prpf6, Nr5a2, Npas3, Dab2ip, 0610031J06Rik, Foxn3, Nlrc5, Stat1, Adam8, Tfdp2, Pycard, Rps6ka4, Esrp2, Tceb1, Il1a, Rnf141, Rbpj, Chaf1b, Nop10, 2700060E02Rik, Nr1i2, Lrrfip1, Snx6, Rnf4, Hivep1, Plagl1, Edn1, Tlr2, Srsf3, Nedd8, Ccl4, Mtpn, Fbl, Tsen2, Ge…
GO:0044087	regulation of cellular co	0.01196 ( 27 of 2257 genes )	0.00926 ( 315 of 34011 annotated genes )	0.02888	1	Ldb2, Tmsb10, Mtap1b, Nck1, Add2, Rhoa, Ccr7, Arhgap6, Plek, Hsp90aa1, Vdac2, Cyr61, Prex1, Kdr, Epb4.9, Xaf1, Senp6, Myo3a, Gsn, Ccl24, Nphs1, Tnf, Dpysl3, Rnf4, Kit, Edn1, Prkca,
GO:0051241	negative regulation of mu	0.01196 ( 27 of 2257 genes )	0.00926 ( 315 of 34011 annotated genes )	0.02888	1	Pdgfa, Tlr2, Apoe, Hmgcr, Smurf1, Cmklr1, Ccr1, Gimap5, Xcl1, P2ry2, Sav1, Thbs1, Fcgr2b, Cd34, Cd38, Hif1a, Trim30a, Gnai2, Tnf, Calca, Mefv, Tspo, Cx3cl1, Aspn, Adm, Prkca, Nfkb1,
GO:0007051	spindle organization	0.00354 ( 8 of 2257 genes )	0.00185 ( 63 of 34011 annotated genes )	0.02897	1	Senp6, Cenpj, Rhoa, Ranbp1, Tubb5, Myh9, Rnf4, Kif3b,
GO:0019058	viral infectious cycle	0.00354 ( 8 of 2257 genes )	0.00185 ( 63 of 34011 annotated genes )	0.02897	1	Ifit1, Ccl4, Tnf, Nr5a2, Ace2, Icam1, Rest, Ppia,
GO:0042158	lipoprotein biosynthetic	0.00354 ( 8 of 2257 genes )	0.00185 ( 63 of 34011 annotated genes )	0.02897	1	Pigu, Alg9, Zdhhc5, Nmt1, Aipl1, Apoe, Abca1, Zdhhc17,
GO:0045621	positive regulation of ly	0.00354 ( 8 of 2257 genes )	0.00185 ( 63 of 34011 annotated genes )	0.02897	1	Ripk2, Gimap5, Pnp, Ccr7, Ap3b1, Hsp90aa1, Adam8, Il2rg,
GO:0002070	epithelial cell maturatio	0.00133 ( 3 of 2257 genes )	0.00035 ( 12 of 34011 annotated genes )	0.02905	1	Gja1, Hif1a, Hoxb13,
GO:0009148	pyrimidine nucleoside tri	0.00133 ( 3 of 2257 genes )	0.00035 ( 12 of 34011 annotated genes )	0.02905	1	Ctps, Nme4, Nme5,
GO:0015732	prostaglandin transport	0.00133 ( 3 of 2257 genes )	0.00035 ( 12 of 34011 annotated genes )	0.02905	1	Il1b, P2ry2, Mif,
GO:0034114	regulation of heterotypic	0.00133 ( 3 of 2257 genes )	0.00035 ( 12 of 34011 annotated genes )	0.02905	1	Il1b, Tnf, Cd44,
GO:0048679	regulation of axon regene	0.00133 ( 3 of 2257 genes )	0.00035 ( 12 of 34011 annotated genes )	0.02905	1	Scarf1, Ndel1, Mif,
GO:0051770	positive regulation of ni	0.00133 ( 3 of 2257 genes )	0.00035 ( 12 of 34011 annotated genes )	0.02905	1	Kdr, Tlr2, Nampt,
GO:0065005	protein-lipid complex ass	0.00133 ( 3 of 2257 genes )	0.00035 ( 12 of 34011 annotated genes )	0.02905	1	Abca1, Fech, Apoe,
GO:0070570	regulation of neuron proj	0.00133 ( 3 of 2257 genes )	0.00035 ( 12 of 34011 annotated genes )	0.02905	1	Scarf1, Ndel1, Mif,
GO:0070587	regulation of cell-cell a	0.00133 ( 3 of 2257 genes )	0.00035 ( 12 of 34011 annotated genes )	0.02905	1	Il1b, Tnf, Cd44,
GO:0071775	regulation of cell cycle	0.00133 ( 3 of 2257 genes )	0.00035 ( 12 of 34011 annotated genes )	0.02905	1	Rhoa, Cspp1, Pkp4,
GO:0071777	positive regulation of ce	0.00133 ( 3 of 2257 genes )	0.00035 ( 12 of 34011 annotated genes )	0.02905	1	Rhoa, Cspp1, Pkp4,
GO:2000403	positive regulation of ly	0.00133 ( 3 of 2257 genes )	0.00035 ( 12 of 34011 annotated genes )	0.02905	1	Ccr7, Xcl1, Adam8,
GO:2000406	positive regulation of T	0.00133 ( 3 of 2257 genes )	0.00035 ( 12 of 34011 annotated genes )	0.02905	1	Ccr7, Xcl1, Adam8,
GO:0002460	adaptive immune response	0.00753 ( 17 of 2257 genes )	0.00520 ( 177 of 34011 annotated genes )	0.02925	1	Pvr, Fcgr2b, Pnp, Fcgr3, Serpinb9, Tap1, Rnf8, C9, Ripk2, Tnf, Gimap5, Xcl1, Ccr7, Ppp3cb, Lyst, Icam1, Il18bp,
GO:0043405	regulation of MAP kinase	0.00842 ( 19 of 2257 genes )	0.00600 ( 204 of 34011 annotated genes )	0.02927	1	Pdgfa, Ptpn11, Dab2ip, Apoe, Hmgcr, Psen1, Ccr7, Adam8, Spred2, Mif, Dusp6, Thbs1, Dusp19, Il1b, Tnf, Kit, Edn1, Map2k1, Prkca,
GO:0030030	cell projection organizat	0.02570 ( 58 of 2257 genes )	0.02276 ( 774 of 34011 annotated genes )	0.02934	1	Egr2, Scn1b, Klf7, Nck1, Prdx6, Psen1, Ywhah, Vim, Lamc1, Ccr7, Cd44, Hsp90aa1, Tnik, Prex1, Kdr, Capg, Cnr1, Srgap2, Ndel1, Lamb1, Lgals1, Ppp2r5d, Gsn, Pou3f2, Nphp3, Pdgfa, Ptpn11, Atxn10, Mtap1b, Grin3a, Caprin1, Ssna1, Fzd1, Rhoa, Afg3l2, Plek, Myh9, P2ry2, Lrp8, Cyfip1, Pld2, Mif, Trove2, Diap1, Gja1, Myo3a, Ptpn23, Rab8a, Il1b, Scarf1, Ager, Robo1, Dpysl3, Ntng1, Kit, Adm, Map2k1, Prkca,
GO:0032504	multicellular organism re	0.01861 ( 42 of 2257 genes )	0.01570 ( 534 of 34011 annotated genes )	0.02964	1	Kdm3a, Nme5, Prlr, Rnf8, Asz1, Catsperb, Acvr2a, Fmn2, Hyal5, Tbata, Kdr, Cnr1, Mtl5, Hif1a, Calca, Adam25, Ddx4, Smad5, Npas3, Ptpn11, Spata19, Tlk2, Smad1, Meig1, P2ry2, Pafah1b2, Bcl2l1, Mif, Plau, Csn3, P2rx1, Abcg2, Xdh, Inpp5b, Mea1, Pebp1, Adam24, Mll2, Ncoa1, Kit, Gm14160, Slc9a10,
GO:0048609	multicellular organismal	0.01861 ( 42 of 2257 genes )	0.01570 ( 534 of 34011 annotated genes )	0.02964	1	Kdm3a, Nme5, Prlr, Rnf8, Asz1, Catsperb, Acvr2a, Fmn2, Hyal5, Tbata, Kdr, Cnr1, Mtl5, Hif1a, Calca, Adam25, Ddx4, Smad5, Npas3, Ptpn11, Spata19, Tlk2, Smad1, Meig1, P2ry2, Pafah1b2, Bcl2l1, Mif, Plau, Csn3, P2rx1, Abcg2, Xdh, Inpp5b, Mea1, Pebp1, Adam24, Mll2, Ncoa1, Kit, Gm14160, Slc9a10,
GO:0034220	ion transmembrane transpo	0.01684 ( 38 of 2257 genes )	0.01397 ( 475 of 34011 annotated genes )	0.02969	1	Scn1b, Accn3, Lasp1, Slc30a6, Cox6c, Psen1, Gpr89, Atp6v0c, Slc31a1, Rest, Atp5b, Cybb, Slc22a4, Slc4a1, Trpm2, Atp5o, Atp5f1, Kcne3, Rhag, Clca6, Magt1, Grin3a, Slco1a4, Homer1, Fkbp1a, Kcnb1, Kcnj2, Slc23a2, Crh, S100a6, Slc13a1, Scn2a1, Clic3, Slco6b1, P2rx1, Slco1b2, Gria2, Slc31a2,
GO:0010975	regulation of neuron proj	0.00930 ( 21 of 2257 genes )	0.00682 ( 232 of 34011 annotated genes )	0.03001	1	Scn1b, Mtap1b, Caprin1, Psen1, Ywhah, Vim, Rhoa, P2ry2, Tnik, Lrp8, Mif, Prex1, Cnr1, Ndel1, Lgals1, Il1b, Ppp2r5d, Scarf1, Pou3f2, Robo1, Dpysl3,
GO:0000154	rRNA modification	0.00089 ( 2 of 2257 genes )	0.00015 ( 5 of 34011 annotated genes )	0.03002	1	Dkc1, Dimt1,
GO:0001767	establishment of lymphocy	0.00089 ( 2 of 2257 genes )	0.00015 ( 5 of 34011 annotated genes )	0.03002	1	Ccr7, Myh9,
GO:0001768	establishment of T cell p	0.00089 ( 2 of 2257 genes )	0.00015 ( 5 of 34011 annotated genes )	0.03002	1	Ccr7, Myh9,
GO:0001781	neutrophil apoptosis	0.00089 ( 2 of 2257 genes )	0.00015 ( 5 of 34011 annotated genes )	0.03002	1	Niacr1, Cd44,
GO:0002051	osteoblast fate commitmen	0.00089 ( 2 of 2257 genes )	0.00015 ( 5 of 34011 annotated genes )	0.03002	1	Smad5, Smad1,
GO:0002238	response to molecule of f	0.00089 ( 2 of 2257 genes )	0.00015 ( 5 of 34011 annotated genes )	0.03002	1	Clec7a, Tlr2,
GO:0002246	wound healing involved in	0.00089 ( 2 of 2257 genes )	0.00015 ( 5 of 34011 annotated genes )	0.03002	1	Cd44, Hif1a,
GO:0002361	CD4-positive, CD25-positi	0.00089 ( 2 of 2257 genes )	0.00015 ( 5 of 34011 annotated genes )	0.03002	1	Gimap5, Il2rg,
GO:0002901	mature B cell apoptosis	0.00089 ( 2 of 2257 genes )	0.00015 ( 5 of 34011 annotated genes )	0.03002	1	Cd44, Mif,
GO:0002905	regulation of mature B ce	0.00089 ( 2 of 2257 genes )	0.00015 ( 5 of 34011 annotated genes )	0.03002	1	Cd44, Mif,
GO:0002906	negative regulation of ma	0.00089 ( 2 of 2257 genes )	0.00015 ( 5 of 34011 annotated genes )	0.03002	1	Cd44, Mif,
GO:0007042	lysosomal lumen acidifica	0.00089 ( 2 of 2257 genes )	0.00015 ( 5 of 34011 annotated genes )	0.03002	1	Ppt1, Atp6v0c,
GO:0015871	choline transport	0.00089 ( 2 of 2257 genes )	0.00015 ( 5 of 34011 annotated genes )	0.03002	1	Slc44a1, Psen1,
GO:0018196	peptidyl-asparagine modif	0.00089 ( 2 of 2257 genes )	0.00015 ( 5 of 34011 annotated genes )	0.03002	1	Ddost, Rpn2,
GO:0032364	oxygen homeostasis	0.00089 ( 2 of 2257 genes )	0.00015 ( 5 of 34011 annotated genes )	0.03002	1	Hif1a, Egln1,
GO:0032493	response to bacterial lip	0.00089 ( 2 of 2257 genes )	0.00015 ( 5 of 34011 annotated genes )	0.03002	1	Tlr2, Tlr1,
GO:0032927	positive regulation of ac	0.00089 ( 2 of 2257 genes )	0.00015 ( 5 of 34011 annotated genes )	0.03002	1	Csnk2b, Acvr2a,
GO:0033034	positive regulation of my	0.00089 ( 2 of 2257 genes )	0.00015 ( 5 of 34011 annotated genes )	0.03002	1	Niacr1, Cd44,
GO:0034643	establishment of mitochon	0.00089 ( 2 of 2257 genes )	0.00015 ( 5 of 34011 annotated genes )	0.03002	1	Rhot1, Mtap1b,
GO:0046826	negative regulation of pr	0.00089 ( 2 of 2257 genes )	0.00015 ( 5 of 34011 annotated genes )	0.03002	1	Txn1, Rangap1,
GO:0046874	quinolinate metabolic pro	0.00089 ( 2 of 2257 genes )	0.00015 ( 5 of 34011 annotated genes )	0.03002	1	Acmsd, Kynu,
GO:0047497	mitochondrion transport a	0.00089 ( 2 of 2257 genes )	0.00015 ( 5 of 34011 annotated genes )	0.03002	1	Rhot1, Mtap1b,
GO:0060763	mammary duct terminal end	0.00089 ( 2 of 2257 genes )	0.00015 ( 5 of 34011 annotated genes )	0.03002	1	Csf1, Robo1,
GO:0061003	positive regulation of de	0.00089 ( 2 of 2257 genes )	0.00015 ( 5 of 34011 annotated genes )	0.03002	1	Caprin1, Lrp8,
GO:0070339	response to bacterial lip	0.00089 ( 2 of 2257 genes )	0.00015 ( 5 of 34011 annotated genes )	0.03002	1	Tlr2, Tlr1,
GO:0071220	cellular response to bact	0.00089 ( 2 of 2257 genes )	0.00015 ( 5 of 34011 annotated genes )	0.03002	1	Tlr2, Tlr1,
GO:0071221	cellular response to bact	0.00089 ( 2 of 2257 genes )	0.00015 ( 5 of 34011 annotated genes )	0.03002	1	Tlr2, Tlr1,
GO:2000343	positive regulation of ch	0.00089 ( 2 of 2257 genes )	0.00015 ( 5 of 34011 annotated genes )	0.03002	1	Tnf, Mif,
GO:0046637	regulation of alpha-beta	0.00266 ( 6 of 2257 genes )	0.00121 ( 41 of 34011 annotated genes )	0.03003	1	Ripk2, Gimap5, Pnp, Ccr7, Ap3b1, Il2rg,
GO:0046823	negative regulation of nu	0.00266 ( 6 of 2257 genes )	0.00121 ( 41 of 34011 annotated genes )	0.03003	1	Txn1, Fzd1, Rangap1, Dab2ip, Psmd10, Litaf,
GO:0050766	positive regulation of ph	0.00266 ( 6 of 2257 genes )	0.00121 ( 41 of 34011 annotated genes )	0.03003	1	Clec7a, Fcgr2b, Ccr7, Cd47, Fcgr3, Bcr,
GO:0032321	positive regulation of Rh	0.00310 ( 7 of 2257 genes )	0.00153 ( 52 of 34011 annotated genes )	0.03004	1	Ccl24, Pip5k1a, Dock4, Ccr7, Srgap2, Ndel1, Pkp4,
GO:0032387	negative regulation of in	0.00310 ( 7 of 2257 genes )	0.00153 ( 52 of 34011 annotated genes )	0.03004	1	Txn1, Fzd1, Rangap1, Mtap1b, Dab2ip, Psmd10, Litaf,
GO:0022411	cellular component disass	0.00620 ( 14 of 2257 genes )	0.00406 ( 138 of 34011 annotated genes )	0.03019	1	Epb4.9, Dnase1l3, Bnip3, Mtap1b, Ndel1, Ppt1, Apaf1, Gsn, Tnf, Add2, Lamc1, Plek, Cycs, Gzma,
GO:0007005	mitochondrion organizatio	0.00842 ( 19 of 2257 genes )	0.00603 ( 205 of 34011 annotated genes )	0.03056	1	Hk2, Rnf7, Bnip3, Chchd3, Mrpl39, Gimap5, Afg3l2, Mrpl15, Timm8a1, Hsp90aa1, Fam162a, Tnfsf10, Bcl2l1, Parl, Ndufs4, Afg3l1, Mtm1, Dnaja3, Psmd10,
GO:0001562	response to protozoan	0.00177 ( 4 of 2257 genes )	0.00062 ( 21 of 34011 annotated genes )	0.0308	1	Gbp6, Lyst, Iigp1, Ier3,
GO:0001916	positive regulation of T	0.00177 ( 4 of 2257 genes )	0.00062 ( 21 of 34011 annotated genes )	0.0308	1	Pvr, Pnp, Xcl1, Tap1,
GO:0002704	negative regulation of le	0.00177 ( 4 of 2257 genes )	0.00062 ( 21 of 34011 annotated genes )	0.0308	1	Fcgr2b, Xcl1, Ppp3cb, Tap1,
GO:0002707	negative regulation of ly	0.00177 ( 4 of 2257 genes )	0.00062 ( 21 of 34011 annotated genes )	0.0308	1	Fcgr2b, Xcl1, Ppp3cb, Tap1,
GO:0023058	adaptation of signaling p	0.00177 ( 4 of 2257 genes )	0.00062 ( 21 of 34011 annotated genes )	0.0308	1	Calca, Grk4, Adm, Pld2,
GO:0032892	positive regulation of or	0.00177 ( 4 of 2257 genes )	0.00062 ( 21 of 34011 annotated genes )	0.0308	1	Il1b, Acsl5, P2ry2, Mif,
GO:0000902	cell morphogenesis	0.02260 ( 51 of 2257 genes )	0.01973 ( 671 of 34011 annotated genes )	0.03138	1	Egr2, Psmb10, Scn1b, Klf7, Dab2, Sh3d19, Psen1, Ywhah, Vim, Lamc1, Fn1, Tnik, Kdr, D930014E17Rik, Srgap2, Ndel1, Lamb1, Hif1a, Gsn, Zmym4, Pou3f2, Dact2, Nphp3, Plod3, Ptpn11, Mtap1b, Dab2ip, Caprin1, Vsig1, Fzd1, Rhoa, Afg3l2, Loxl2, Myh9, Adam8, Lrp8, Adam15, Tgfb1i1, Cyfip1, Mif, Trove2, Rbpj, Gja1, Ptpn23, Rab8a, Scarf1, Robo1, Ntng1, Adm, Map2k1, Prkca,
GO:0001894	tissue homeostasis	0.00532 ( 12 of 2257 genes )	0.00332 ( 113 of 34011 annotated genes )	0.03148	1	Ldb2, Kdr, Csf1, Vps54, Ctsk, Vsig1, Cd38, Cd34, Aipl1, Xdh, Calca, Adam8,
GO:0008064	regulation of actin polym	0.00443 ( 10 of 2257 genes )	0.00259 ( 88 of 34011 annotated genes )	0.0315	1	Prex1, Tmsb10, Epb4.9, Nck1, Gsn, Ccl24, Nphs1, Add2, Rhoa, Plek,
GO:0009063	cellular amino acid catab	0.00399 ( 9 of 2257 genes )	0.00223 ( 76 of 34011 annotated genes )	0.03185	1	Mthfd1, Hdc, Bckdk, Aadat, Agxt, Tdo2, Kynu, BC026590, Lao1,
GO:0003008	system process	0.07355 ( 166 of 2257 genes )	0.07304 ( 2484 of 34011 annotated genes )	0.03189	1	Olfr707, Mybpc2, Scn1b, Olfr821, Olfr740, Olfr325, Csrp3, Olfr196, Olfr1457, Cysltr1, Olfr1504, Olfr811, Ttn, Olfr228, Olfr1080, Lamb1, Olfr1404, Olfr649, Olfr815, Slc4a7, Vmn1r47, Olfr787, Olfr771, Uts2d, Ppef1, Olfr187, Gch1, Ptpn11, Grin3a, Olfr1246, Hmgcr, Stat1, Prol1, Olfr837, P2ry2, Olfr850, Myl6, Il1a, Olfr58, Olfr1137, Olfr1341, Myo3a, Rab8a, Nphs1, Gnai2, Olfr224, Pebp1, Vdac3, Vmn1r29,…
GO:0032271	regulation of protein pol	0.00487 ( 11 of 2257 genes )	0.00297 ( 101 of 34011 annotated genes )	0.03273	1	Prex1, Tmsb10, Epb4.9, Mtap1b, Nck1, Gsn, Ccl24, Nphs1, Add2, Rhoa, Vdac2,
GO:0009064	glutamine family amino ac	0.00310 ( 7 of 2257 genes )	0.00156 ( 53 of 34011 annotated genes )	0.03294	1	Ctps, Aldh18a1, Aadat, Ggh, Cd34, Lgsn, Gmps,
GO:0046496	nicotinamide nucleotide m	0.00310 ( 7 of 2257 genes )	0.00156 ( 53 of 34011 annotated genes )	0.03294	1	Hibadh, Mdh2, Pnp, Nampt, Pgam1, Kynu, Ldha,
GO:0050792	regulation of viral repro	0.00310 ( 7 of 2257 genes )	0.00156 ( 53 of 34011 annotated genes )	0.03294	1	Ifit1, Ccl4, Tnf, Nr5a2, Oas1a, Rest, Ppia,
GO:0009100	glycoprotein metabolic pr	0.00842 ( 19 of 2257 genes )	0.00609 ( 207 of 34011 annotated genes )	0.03329	1	Lmf1, Bace2, St3gal5, Alg8, Csgalnact1, Fkbp1a, Psen1, Chst11, Cytl1, Ddost, Rpn1, Pomt2, Pion, Fut11, Tmed10, Dpagt1, Hif1a, Rpn2, St3gal4,
GO:0002690	positive regulation of le	0.00266 ( 6 of 2257 genes )	0.00123 ( 42 of 34011 annotated genes )	0.03337	1	Ccr1, Ccr7, Xcl1, Cx3cl1, Cmklr1, Edn1,
GO:0010970	microtubule-based transpo	0.00266 ( 6 of 2257 genes )	0.00123 ( 42 of 34011 annotated genes )	0.03337	1	Rhot1, Mtap1b, Ndel1, Ssna1, Hif1a, Map2k1,
GO:0030705	cytoskeleton-dependent in	0.00266 ( 6 of 2257 genes )	0.00123 ( 42 of 34011 annotated genes )	0.03337	1	Rhot1, Mtap1b, Ndel1, Ssna1, Hif1a, Map2k1,
GO:0031532	actin cytoskeleton reorga	0.00266 ( 6 of 2257 genes )	0.00123 ( 42 of 34011 annotated genes )	0.03337	1	Pip5k1a, Ptpn1, Plek, Myh9, Tnik, Kit,
GO:0097006	regulation of plasma lipo	0.00266 ( 6 of 2257 genes )	0.00123 ( 42 of 34011 annotated genes )	0.03337	1	Abca1, Fech, Lmf1, Ldlr, Apoe, Ehd1,
GO:0021543	pallium development	0.00443 ( 10 of 2257 genes )	0.00262 ( 89 of 34011 annotated genes )	0.03371	1	Lhx5, Srgap2, Ndel1, Hif1a, Psen1, Pou3f2, Robo1, Emx2, Cx3cr1, Lrp8,
GO:0030832	regulation of actin filam	0.00443 ( 10 of 2257 genes )	0.00262 ( 89 of 34011 annotated genes )	0.03371	1	Prex1, Tmsb10, Epb4.9, Nck1, Gsn, Ccl24, Nphs1, Add2, Rhoa, Plek,
GO:0055074	calcium ion homeostasis	0.01019 ( 23 of 2257 genes )	0.00773 ( 263 of 34011 annotated genes )	0.0339	1	Immt, Apoe, Fkbp1a, Psen1, Ccr1, Gimap5, Xcl1, Csrp3, P2ry2, C5ar1, Kdr, Diap1, Trdn, Cd38, Nucb2, Tgm2, Il1b, Calca, Cxcl1, Ager, Adm, Edn1, Prkca,
GO:0030833	regulation of actin filam	0.00399 ( 9 of 2257 genes )	0.00226 ( 77 of 34011 annotated genes )	0.03427	1	Prex1, Tmsb10, Epb4.9, Nck1, Gsn, Ccl24, Nphs1, Add2, Rhoa,
GO:0043408	regulation of MAPKKK casc	0.01152 ( 26 of 2257 genes )	0.00900 ( 306 of 34011 annotated genes )	0.03455	1	Pdgfa, Dab2ip, Hmgcr, Ccr1, Ccr7, Cd44, Cyr61, Osm, Mif, Dusp6, Kdr, Il1a, Stk3, Cnksr3, A430084P05Rik, Ltbr, Chi3l1, Ripk2, Il1b, Tnf, Pebp1, Kit, Prkca, Edn1, Map2k1, Psmd10,
GO:0031175	neuron projection develop	0.01861 ( 42 of 2257 genes )	0.01588 ( 540 of 34011 annotated genes )	0.03458	1	Egr2, Scn1b, Klf7, Psen1, Ywhah, Vim, Lamc1, Cd44, Tnik, Prex1, Kdr, Cnr1, Srgap2, Ndel1, Lamb1, Lgals1, Ppp2r5d, Pou3f2, Atxn10, Ptpn11, Mtap1b, Grin3a, Caprin1, Fzd1, Rhoa, Afg3l2, P2ry2, Lrp8, Cyfip1, Pld2, Mif, Diap1, Gja1, Il1b, Scarf1, Robo1, Ager, Dpysl3, Ntng1, Adm, Map2k1, Prkca,
GO:0031325	positive regulation of ce	0.04785 ( 108 of 2257 genes )	0.04593 ( 1562 of 34011 annotated genes )	0.03464	1	Nfe2l2, Kdm3a, Pcbd2, Med14, Nck1, Dab2, Tnfrsf1b, Psen1, Ywhah, Ets2, Cd44, Hsp90aa1, Cyr61, Osm, Rest, Cd38, Chi3l1, Ripk2, Ppp2r5d, Tnf, Pou3f2, Armcx3, Tspo, Adam9, Psmd10, Nfkb1, Nupr1, Rnf180, Lhx5, Nr5a2, Prpf6, Tnfaip1, Dab2ip, Fcgr3, 0610031J06Rik, Apoe, Nlrc5, Abca1, Stat1, Smad1, Adam8, Tmem173, Pafah1b2, Rfx6, Rps6ka4, Tceb1, Il1a, Rbpj, Ldlr, 2700060E02Rik, Nr1i2, Aimp2, Scoc, Pebp1,…
GO:0008154	actin polymerization or d	0.00487 ( 11 of 2257 genes )	0.00300 ( 102 of 34011 annotated genes )	0.03483	1	Prex1, Tmsb10, Diap1, Epb4.9, Nck1, Gsn, Ccl24, Nphs1, Add2, Rhoa, Plek,
GO:0031346	positive regulation of ce	0.00665 ( 15 of 2257 genes )	0.00453 ( 154 of 34011 annotated genes )	0.03493	1	Cnr1, Scn1b, Mtap1b, Caprin1, Ndel1, Myo3a, Scarf1, Ppp2r5d, Robo1, Ccr7, Dpysl3, Hsp90aa1, P2ry2, Kit, Mif,
GO:0009308	amine metabolic process	0.01684 ( 38 of 2257 genes )	0.01414 ( 481 of 34011 annotated genes )	0.03495	1	Ctps, Sult1d1, Aadat, Csgalnact1, Bbox1, Cd44, Chst11, Moxd1, Mthfd1, Agxt, Slc22a4, Kynu, Chi3l1, Hars, Crat, Gmps, Hibadh, Ppap2a, Gch1, Allc, Aldh18a1, Ly6e, BC026590, Lao1, Hdc, Gns, Bckdk, Cd34, Pgcp, Tdo2, Ldlr, Lgsn, Itih3, Rars, Il1b, Pebp1, Odc1, Ggh,
GO:0046486	glycerolipid metabolic pr	0.00886 ( 20 of 2257 genes )	0.00653 ( 222 of 34011 annotated genes )	0.03502	1	Pip5k1a, Pdgfa, Ppap2a, Insig2, Ptpn11, Alg9, Lmf1, Apoe, Tmem195, Acsl5, Plek, Pla2g2a, Pip5kl1, Pigu, Slc22a4, Ldlr, Ip6k1, Dgkh, Inpp5b, Mtm1,
GO:0030154	cell differentiation	0.07355 ( 166 of 2257 genes )	0.07327 ( 2492 of 34011 annotated genes )	0.03505	1	Lrg1, Anpep, Scn1b, Ywhah, Asz1, Mir133b, Ccr7, Catsperb, Csrp3, Chst11, Hsp90aa1, Rest, Ttn, Mtl5, Lamb1, Lgals1, Jmjd6, Dact2, Slc4a7, Tspo, Ppia, Ptpn11, Lhx5, Grin3a, Dab2ip, Adam8, P2ry2, Emx2, Mmp19, Il1a, Rbpj, Rgs6, Nphs1, Pebp1, Adam24, Fech, Dpysl3, Slc9a10, Edn1, Bnip3, Prlr, Smurf1, Ctsl, Acvr2a, Tnik, Hspg2, Dusp6, Kdr, Cnr1, Srgap2, Ndel1, Hif1a, Ppp3cb, Dmbt1, Exoc4, Ldb2, Smad5, P…
GO:0032787	monocarboxylic acid metab	0.01329 ( 30 of 2257 genes )	0.01070 ( 364 of 34011 annotated genes )	0.03512	1	Mthfd1l, Hpgd, Acly, Insig2, Ch25h, Nr5a2, Degs1, Csgalnact1, Tmem195, Scd2, Acsl5, Sc4mol, Ptgr1, Ldha, Mif, Fasn, Elovl3, Cnr1, Agxt, Kynu, Hif1a, Acsm2, Pkm2, Far1, Aldh1a1, Acot2, Elovl2, Prkab1, Crat, Edn1,
GO:0070085	glycosylation	0.00532 ( 12 of 2257 genes )	0.00338 ( 115 of 34011 annotated genes )	0.03539	1	Rpn1, Ddost, Pomt2, Fut11, Lmf1, St3gal5, Dpagt1, Alg8, Psen1, Rpn2, Gbgt1, St3gal4,
GO:0006081	cellular aldehyde metabol	0.00222 ( 5 of 2257 genes )	0.00094 ( 32 of 34011 annotated genes )	0.0359	1	Gpi1, Kdm3a, Agxt, Aldh3b1, Adh4,
GO:0035587	purinergic receptor signa	0.00222 ( 5 of 2257 genes )	0.00094 ( 32 of 34011 annotated genes )	0.0359	1	Gnai2, Niacr1, P2rx1, P2ry2, P2ry13,
GO:0045429	positive regulation of ni	0.00222 ( 5 of 2257 genes )	0.00094 ( 32 of 34011 annotated genes )	0.0359	1	Il1b, Tnf, Tlr2, Hsp90aa1, Icam1,
GO:0045744	negative regulation of G-	0.00222 ( 5 of 2257 genes )	0.00094 ( 32 of 34011 annotated genes )	0.0359	1	Calca, Plek, Grk4, Adm, Pld2,
GO:0010470	regulation of gastrulatio	0.00177 ( 4 of 2257 genes )	0.00065 ( 22 of 34011 annotated genes )	0.03596	1	Il1b, Tnf, Cd44, Dusp6,
GO:0010761	fibroblast migration	0.00177 ( 4 of 2257 genes )	0.00065 ( 22 of 34011 annotated genes )	0.03596	1	Thbs1, Pip5k1a, Ager, Zfp640,
GO:0015695	organic cation transport	0.00177 ( 4 of 2257 genes )	0.00065 ( 22 of 34011 annotated genes )	0.03596	1	Slc44a1, Rhag, Slc22a4, Psen1,
GO:0030865	cortical cytoskeleton org	0.00177 ( 4 of 2257 genes )	0.00065 ( 22 of 34011 annotated genes )	0.03596	1	Epb4.1, Plek, Tln1, Ehd2,
GO:0042481	regulation of odontogenes	0.00177 ( 4 of 2257 genes )	0.00065 ( 22 of 34011 annotated genes )	0.03596	1	Csf1, Cd34, Aspn, Edn1,
GO:0048278	vesicle docking	0.00177 ( 4 of 2257 genes )	0.00065 ( 22 of 34011 annotated genes )	0.03596	1	Exoc6b, Plek, Rab8a, Exoc4,
GO:0072384	organelle transport along	0.00177 ( 4 of 2257 genes )	0.00065 ( 22 of 34011 annotated genes )	0.03596	1	Rhot1, Mtap1b, Ndel1, Map2k1,
GO:0002831	regulation of response to	0.00310 ( 7 of 2257 genes )	0.00159 ( 54 of 34011 annotated genes )	0.03602	1	Ifit1, Pvr, Xcl1, Tmem173, Pycard, Prkca, Mif,
GO:0032368	regulation of lipid trans	0.00310 ( 7 of 2257 genes )	0.00159 ( 54 of 34011 annotated genes )	0.03602	1	Abca1, Il1b, Thbs1, Acsl5, P2ry2, Apoe, Mif,
GO:0006184	GTP catabolic process	0.01241 ( 28 of 2257 genes )	0.00988 ( 336 of 34011 annotated genes )	0.03611	1	Pip5k1a, Gch1, Rhot1, Tuba8, Rhoj, Dab2ip, Tbc1d8, Mras, Iigp1, Rhoa, Ccr7, Arhgap6, Tbcc, Gnb4, Tbc1d2b, Tbc1d5, Srgap2, Srpr, Ndel1, Pkp4, Gnai3, Ccl24, Gnai2, Dock4, Tubb5, Rragc, Rap2c, Map2k1,
GO:0051101	regulation of DNA binding	0.01241 ( 28 of 2257 genes )	0.00988 ( 336 of 34011 annotated genes )	0.03611	1	Tlr2, Dab2ip, Foxn3, 4930447C04Rik, Cmklr1, Nlrc5, Fzd1, Xcl1, Adam8, Gzma, Mtpn, Cytl1, Lrp8, Pycard, Egln1, Psma6, Txn1, Ripk2, Il1b, Tnf, Ager, Icam1, Dnaja3, Kit, Ube2n, Commd1, Ppap2b, Psmd10,
GO:0001774	microglial cell activatio	0.00133 ( 3 of 2257 genes )	0.00038 ( 13 of 34011 annotated genes )	0.03617	1	Tlr2, Casp1, Cx3cr1,
GO:0001820	serotonin secretion	0.00133 ( 3 of 2257 genes )	0.00038 ( 13 of 34011 annotated genes )	0.03617	1	P2rx1, Fcgr3, Crh,
GO:0002866	positive regulation of ac	0.00133 ( 3 of 2257 genes )	0.00038 ( 13 of 34011 annotated genes )	0.03617	1	Cnr1, Ccr7, Fcgr3,
GO:0002922	positive regulation of hu	0.00133 ( 3 of 2257 genes )	0.00038 ( 13 of 34011 annotated genes )	0.03617	1	Gimap5, Tnf, Ccr7,
GO:0007130	synaptonemal complex asse	0.00133 ( 3 of 2257 genes )	0.00038 ( 13 of 34011 annotated genes )	0.03617	1	Syce2, Tex11, Syce1,
GO:0009074	aromatic amino acid famil	0.00133 ( 3 of 2257 genes )	0.00038 ( 13 of 34011 annotated genes )	0.03617	1	Aadat, Tdo2, Kynu,
GO:0009133	nucleoside diphosphate bi	0.00133 ( 3 of 2257 genes )	0.00038 ( 13 of 34011 annotated genes )	0.03617	1	Ak2, Guk1, Atp5b,
GO:0009147	pyrimidine nucleoside tri	0.00133 ( 3 of 2257 genes )	0.00038 ( 13 of 34011 annotated genes )	0.03617	1	Ctps, Nme4, Nme5,
GO:0009200	deoxyribonucleoside triph	0.00133 ( 3 of 2257 genes )	0.00038 ( 13 of 34011 annotated genes )	0.03617	1	Ak2, Pnp, Guk1,
GO:0010939	regulation of necrotic ce	0.00133 ( 3 of 2257 genes )	0.00038 ( 13 of 34011 annotated genes )	0.03617	1	Tnf, Cd34, Tspo,
GO:0015697	quaternary ammonium group	0.00133 ( 3 of 2257 genes )	0.00038 ( 13 of 34011 annotated genes )	0.03617	1	Slc44a1, Slc22a4, Psen1,
GO:0019359	nicotinamide nucleotide b	0.00133 ( 3 of 2257 genes )	0.00038 ( 13 of 34011 annotated genes )	0.03617	1	Pnp, Nampt, Kynu,
GO:0032305	positive regulation of ic	0.00133 ( 3 of 2257 genes )	0.00038 ( 13 of 34011 annotated genes )	0.03617	1	Il1b, P2ry2, Mif,
GO:0034113	heterotypic cell-cell adh	0.00133 ( 3 of 2257 genes )	0.00038 ( 13 of 34011 annotated genes )	0.03617	1	Il1b, Tnf, Cd44,
GO:0046902	regulation of mitochondri	0.00133 ( 3 of 2257 genes )	0.00038 ( 13 of 34011 annotated genes )	0.03617	1	Gimap5, Bnip3, Bcl2l1,
GO:0050650	chondroitin sulfate prote	0.00133 ( 3 of 2257 genes )	0.00038 ( 13 of 34011 annotated genes )	0.03617	1	Chst11, Csgalnact1, Cytl1,
GO:0070586	cell-cell adhesion involv	0.00133 ( 3 of 2257 genes )	0.00038 ( 13 of 34011 annotated genes )	0.03617	1	Il1b, Tnf, Cd44,
GO:0022403	cell cycle phase	0.02038 ( 46 of 2257 genes )	0.01770 ( 602 of 34011 annotated genes )	0.03637	1	Bub1b, Syce2, Rnf8, Ywhah, Ruvbl1, Asz1, Ranbp1, Eif4e, Osm, Fmn2, Rrs1, Npat, Klf11, Tex11, Senp6, Pinx1, Tnf, Rbm7, Ddx4, Papd7, Taf2, D7Ertd443e, Rhoa, Meig1, Myh9, Anapc10, Kif3b, Bcl2l1, Nsun2, Il1a, Cdc123, Cts7, Camk2g, Nudc, Lsm10, Il1b, Pebp1, Cenpj, Tubb5, Mapre2, Rnf4, Syce1, Gm14160, Anapc13, Edn1, Map2k1,
GO:0006084	acetyl-CoA metabolic proc	0.00266 ( 6 of 2257 genes )	0.00126 ( 43 of 34011 annotated genes )	0.03694	1	Acly, Mdh2, Suclg1, Tdo2, Kynu, Cs,
GO:0006984	ER-nucleus signaling path	0.00266 ( 6 of 2257 genes )	0.00126 ( 43 of 34011 annotated genes )	0.03694	1	Nfe2l2, Insig2, Ppp1r15b, Ptpn1, Ero1l, Dnajc3,
GO:0007030	Golgi organization	0.00266 ( 6 of 2257 genes )	0.00126 ( 43 of 34011 annotated genes )	0.03694	1	Gorasp2, Blzf1, l7Rn6, Tmed10, Nsfl1c, Map2k1,
GO:0034341	response to interferon-ga	0.00266 ( 6 of 2257 genes )	0.00126 ( 43 of 34011 annotated genes )	0.03694	1	Nlrc5, Gch1, Stat1, Gbp6, Kynu, Dnaja3,
GO:0043648	dicarboxylic acid metabol	0.00266 ( 6 of 2257 genes )	0.00126 ( 43 of 34011 annotated genes )	0.03694	1	Mdh2, Suclg1, Aadat, Acmsd, Kynu, Cs,
GO:0045670	regulation of osteoclast	0.00266 ( 6 of 2257 genes )	0.00126 ( 43 of 34011 annotated genes )	0.03694	1	Ccr1, Csf1, Tnf, Calca, 5730469M10Rik, Adam8,
GO:0030010	establishment of cell pol	0.00354 ( 8 of 2257 genes )	0.00194 ( 66 of 34011 annotated genes )	0.03695	1	Cdh5, Frmd4a, Ccr7, Mtap1b, Gja1, Amotl1, Myh9, Exoc4,
GO:0032675	regulation of interleukin	0.00354 ( 8 of 2257 genes )	0.00194 ( 66 of 34011 annotated genes )	0.03695	1	Il1a, Tlr2, Mapkapk2, Trim30a, Il1b, Ripk2, Tnf, Tlr1,
GO:0043154	negative regulation of ca	0.00354 ( 8 of 2257 genes )	0.00194 ( 66 of 34011 annotated genes )	0.03695	1	Gpi1, Thbs1, Serpinb9, Csnk2a1, Cflar, Cd44, Dnaja3, Bcl2l1,
GO:0043161	proteasomal ubiquitin-dep	0.00620 ( 14 of 2257 genes )	0.00418 ( 142 of 34011 annotated genes )	0.0372	1	Birc2, Pcnp, Rnf180, Dab2, Tnfaip1, Sec61b, Psen1, Smurf1, Fbxl5, Rnf4, Anapc10, Commd1, Psmc5, Psmd10,
GO:0002699	positive regulation of im	0.00532 ( 12 of 2257 genes )	0.00341 ( 116 of 34011 annotated genes )	0.03747	1	Pvr, Pnp, Tlr2, Fcgr3, Tap1, Ripk2, Tnf, Gimap5, Xcl1, Ccr7, Mif, Pld2,
GO:0050795	regulation of behavior	0.00576 ( 13 of 2257 genes )	0.00379 ( 129 of 34011 annotated genes )	0.03749	1	Kdr, Thbs1, Cnr1, Casp1, Cmklr1, Ccr1, Ager, Robo1, Xcl1, Ccr7, Cx3cl1, Edn1, Prkca,
GO:0007178	transmembrane receptor pr	0.00886 ( 20 of 2257 genes )	0.00659 ( 224 of 34011 annotated genes )	0.03792	1	Hpgd, Smad5, Mirlet7f-2, Dsg4, Ecsit, Fkbp1a, Smurf1, Fzd1, Smad1, Acvr2a, Chst11, Cyr61, Tgfb1i1, Skor2, Thbs1, Rbpj, Csnk2b, Snx6, Adam9, Aspn,
GO:0002683	negative regulation of im	0.00753 ( 17 of 2257 genes )	0.00538 ( 183 of 34011 annotated genes )	0.03843	1	Socs6, Pdcd1lg2, Tap1, Trafd1, Ccr1, Gimap5, Xcl1, Thbs1, Cd86, Cd59b, Fcgr2b, Cnr1, Psmb4, Trim30a, Ifit1, Ppp3cb, Bcr,
GO:0048513	organ development	0.06557 ( 148 of 2257 genes )	0.06501 ( 2211 of 34011 annotated genes )	0.03924	1	Mapkapk2, Ccr7, Csrp3, Chst11, Hsp90aa1, Rest, Ttn, Lamb1, Lgals1, Chi3l1, Bglap, Aldh1a1, Jmjd6, Dact2, Slc4a7, Nfkb1, Nupr1, Lhx5, Dab2ip, Hmgcr, Crip2, Adam8, Emx2, Myl6, Il1a, Rbpj, Myo3a, Pkm2, Nphs1, Fech, Edn1, Spnb1, Prl, Prlr, Acvr2a, Phex, Hspg2, Dusp6, Thbs1, Kdr, Srgap2, Ndel1, Hif1a, Ppp3cb, Bglap-rs1, Ldb2, Smad5, Insig2, Pnp, Sox21, Homer1, Fkbp1a, Nid1, Ly6e, Pfdn1, Cytl1, Lrp8, H…
GO:0002221	pattern recognition recep	0.00310 ( 7 of 2257 genes )	0.00162 ( 55 of 34011 annotated genes )	0.03928	1	Tnip3, Clec7a, Ripk2, Cd86, Tlr2, Mapkapk2, Trim30a,
GO:0070304	positive regulation of st	0.00310 ( 7 of 2257 genes )	0.00162 ( 55 of 34011 annotated genes )	0.03928	1	Ripk2, Il1b, Tnf, Il1a, Stk3, Ltbr, Hmgcr,
GO:0006874	cellular calcium ion home	0.00975 ( 22 of 2257 genes )	0.00744 ( 253 of 34011 annotated genes )	0.03939	1	Immt, Apoe, Fkbp1a, Psen1, Ccr1, Gimap5, Xcl1, Csrp3, P2ry2, C5ar1, Kdr, Diap1, Trdn, Cd38, Nucb2, Tgm2, Il1b, Calca, Cxcl1, Adm, Edn1, Prkca,
GO:0006639	acylglycerol metabolic pr	0.00399 ( 9 of 2257 genes )	0.00232 ( 79 of 34011 annotated genes )	0.0395	1	Ppap2a, Insig2, Ptpn11, Lmf1, Slc22a4, Ldlr, Apoe, Dgkh, Acsl5,
GO:0016050	vesicle organization	0.00399 ( 9 of 2257 genes )	0.00232 ( 79 of 34011 annotated genes )	0.0395	1	Ap3b1, Stx8, Rab8a, Gnai3, Abca1, Stx6, Lyst, Vamp8, Clint1,
GO:0032320	positive regulation of Ra	0.00399 ( 9 of 2257 genes )	0.00232 ( 79 of 34011 annotated genes )	0.0395	1	Pip5k1a, Srgap2, Dab2ip, Ndel1, Pkp4, Ccl24, Dock4, Ccr7, Map2k1,
GO:0007264	small GTPase mediated sig	0.01728 ( 39 of 2257 genes )	0.01473 ( 501 of 34011 annotated genes )	0.03998	1	Rhot1, Tbc1d8, Fgd5, Ccr7, Rab44, Prex1, Tbc1d2b, Srgap2, Ndel1, Ttn, Rapgefl1, Ccl24, Dock4, Rap1gap2, Rnd1, Rab3c, Bcr, Rgl1, Csf1, Pip5k1a, Tnfaip1, Dab2ip, Rhoj, Mras, Apoe, Abca1, Arf3, Rhoa, Mapkapk5, Rnd3, Iqsec2, Shoc2, Tbc1d5, Arhgap31, Rab8a, Pkp4, Rap2c, Dnaja3, Map2k1,
GO:0032989	cellular component morpho	0.02393 ( 54 of 2257 genes )	0.02140 ( 728 of 34011 annotated genes )	0.04033	1	Egr2, Psmb10, Scn1b, Klf7, Dab2, Sh3d19, Psen1, Ywhah, Vim, Lamc1, Fn1, Tnik, Kdr, D930014E17Rik, Srgap2, Ndel1, Ttn, Lamb1, Hif1a, Gsn, Zmym4, Pou3f2, Dact2, Nphp3, Mtm1, Plod3, Ptpn11, Mtap1b, Dab2ip, Caprin1, Vsig1, Fzd1, Rhoa, Afg3l2, Loxl2, Myh9, Adam8, Lrp8, Adam15, Tgfb1i1, Cyfip1, Mif, Trove2, Rbpj, Gja1, Ptpn23, Rab8a, Scarf1, Robo1, Ntng1, Adm, Edn1, Map2k1, Prkca,
GO:0000186	activation of MAPKK activ	0.00222 ( 5 of 2257 genes )	0.00097 ( 33 of 34011 annotated genes )	0.04036	1	Gnai2, Mapksp1, Tnik, Adam9, Psen1,
GO:0002718	regulation of cytokine pr	0.00222 ( 5 of 2257 genes )	0.00097 ( 33 of 34011 annotated genes )	0.04036	1	Gimap5, Tnf, Tlr2, Xcl1, Mif,
GO:0009161	ribonucleoside monophosph	0.00222 ( 5 of 2257 genes )	0.00097 ( 33 of 34011 annotated genes )	0.04036	1	Ak2, Guk1, Gmps, Ak4, Atic,
GO:0015914	phospholipid transport	0.00222 ( 5 of 2257 genes )	0.00097 ( 33 of 34011 annotated genes )	0.04036	1	Abca1, Atp10a, Atp11a, Ldlr, Apoe,
GO:0045840	positive regulation of mi	0.00222 ( 5 of 2257 genes )	0.00097 ( 33 of 34011 annotated genes )	0.04036	1	Il1b, Tnf, Il1a, Pebp1, Edn1,
GO:0051403	stress-activated MAPK cas	0.00222 ( 5 of 2257 genes )	0.00097 ( 33 of 34011 annotated genes )	0.04036	1	Ripk2, Il1b, Il1a, Hmgcr, Map2k1,
GO:0051785	positive regulation of nu	0.00222 ( 5 of 2257 genes )	0.00097 ( 33 of 34011 annotated genes )	0.04036	1	Il1b, Tnf, Il1a, Pebp1, Edn1,
GO:0009101	glycoprotein biosynthetic	0.00665 ( 15 of 2257 genes )	0.00462 ( 157 of 34011 annotated genes )	0.04036	1	Rpn1, Ddost, Pomt2, Fut11, Lmf1, Bace2, St3gal5, Dpagt1, Alg8, Csgalnact1, Psen1, Rpn2, Chst11, Cytl1, St3gal4,
GO:0046890	regulation of lipid biosy	0.00443 ( 10 of 2257 genes )	0.00271 ( 92 of 34011 annotated genes )	0.04099	1	Pdgfa, Insig2, Il1a, Ldlr, Apoe, Tnf, Acsl5, Tspo, Cyr61, Rest,
GO:0032844	regulation of homeostatic	0.00886 ( 20 of 2257 genes )	0.00664 ( 226 of 34011 annotated genes )	0.041	1	Scn1b, Fkbp1a, Ccr1, Gimap5, Xcl1, Cd44, Acvr2a, Adam8, Mif, Cnr1, Diap1, Niacr1, Gja1, Trdn, Cd38, Hif1a, Il1b, Tnf, Calca, Tspo,
GO:0007049	cell cycle	0.03500 ( 79 of 2257 genes )	0.03281 ( 1116 of 34011 annotated genes )	0.04107	1	Bub1b, Mcm3, Mapkapk2, Ywhah, Ruvbl1, Asz1, Senp5, Eif4e, Osm, Fmn2, Tex11, Senp6, Gnai3, Tnf, Mapk6, Psmd10, Birc2, Pcnp, Hpgd, Nupr1, Ptpn11, Papd7, Foxn3, Tlk2, Rhoa, 2610002M06Rik, Bcl2l1, Kif3b, Nsun2, Il1a, Chaf1b, Camk2g, B230120H23Rik, Cks1b, Gnai2, Cenpj, Pebp1, Mapre2, Rnf4, Gm14160, Syce1, Pla2g16, Prkca, Edn1, Erh, Syce2, Rnf8, Ranbp1, Txnip, Cspp1, Thbs1, Rrs1, Npat, Klf11, Obfc2a, P…
GO:0002702	positive regulation of pr	0.00177 ( 4 of 2257 genes )	0.00068 ( 23 of 34011 annotated genes )	0.04159	1	Gimap5, Tlr2, Xcl1, Mif,
GO:0009262	deoxyribonucleotide metab	0.00177 ( 4 of 2257 genes )	0.00068 ( 23 of 34011 annotated genes )	0.04159	1	Ak2, Rrm1, Pnp, Guk1,
GO:0032855	positive regulation of Ra	0.00177 ( 4 of 2257 genes )	0.00068 ( 23 of 34011 annotated genes )	0.04159	1	Ccl24, Pip5k1a, Dock4, Srgap2,
GO:0042147	retrograde transport, end	0.00177 ( 4 of 2257 genes )	0.00068 ( 23 of 34011 annotated genes )	0.04159	1	Stx6, Vps54, Snx6, Snx1,
GO:0045909	positive regulation of va	0.00177 ( 4 of 2257 genes )	0.00068 ( 23 of 34011 annotated genes )	0.04159	1	Kdr, Calca, Vip, Adm,
GO:0043410	positive regulation of MA	0.00753 ( 17 of 2257 genes )	0.00544 ( 185 of 34011 annotated genes )	0.04191	1	Pdgfa, Hmgcr, Ccr1, Cd44, Osm, Mif, Kdr, Stk3, Il1a, A430084P05Rik, Ltbr, Chi3l1, Il1b, Ripk2, Tnf, Kit, Prkca,
GO:0002685	regulation of leukocyte m	0.00399 ( 9 of 2257 genes )	0.00235 ( 80 of 34011 annotated genes )	0.04231	1	Tlr2, Cmklr1, Ccr1, Xcl1, Ccr7, Adam8, Icam1, Cx3cl1, Edn1,
GO:0019362	pyridine nucleotide metab	0.00310 ( 7 of 2257 genes )	0.00165 ( 56 of 34011 annotated genes )	0.04273	1	Hibadh, Mdh2, Pnp, Nampt, Pgam1, Kynu, Ldha,
GO:0046888	negative regulation of ho	0.00310 ( 7 of 2257 genes )	0.00165 ( 56 of 34011 annotated genes )	0.04273	1	Il1b, Ptpn11, Osm, Crh, Rest, Hmgcr, Edn1,
GO:0072524	pyridine-containing compo	0.00310 ( 7 of 2257 genes )	0.00165 ( 56 of 34011 annotated genes )	0.04273	1	Hibadh, Mdh2, Pnp, Nampt, Pgam1, Kynu, Ldha,
GO:0032635	interleukin-6 production	0.00354 ( 8 of 2257 genes )	0.00200 ( 68 of 34011 annotated genes )	0.04302	1	Il1a, Tlr2, Mapkapk2, Trim30a, Il1b, Ripk2, Tnf, Tlr1,
GO:0002468	dendritic cell antigen pr	0.00089 ( 2 of 2257 genes )	0.00018 ( 6 of 34011 annotated genes )	0.04331	1	Thbs1, Ccr7,
GO:0002576	platelet degranulation	0.00089 ( 2 of 2257 genes )	0.00018 ( 6 of 34011 annotated genes )	0.04331	1	Plek, P2rx1,
GO:0002604	regulation of dendritic c	0.00089 ( 2 of 2257 genes )	0.00018 ( 6 of 34011 annotated genes )	0.04331	1	Thbs1, Ccr7,
GO:0002691	regulation of cellular ex	0.00089 ( 2 of 2257 genes )	0.00018 ( 6 of 34011 annotated genes )	0.04331	1	Icam1, Adam8,
GO:0003256	regulation of transcripti	0.00089 ( 2 of 2257 genes )	0.00018 ( 6 of 34011 annotated genes )	0.04331	1	Tbx2, Rbpj,
GO:0006370	mRNA capping	0.00089 ( 2 of 2257 genes )	0.00018 ( 6 of 34011 annotated genes )	0.04331	1	Ftsjd2, Ncbp2,
GO:0006548	histidine catabolic proce	0.00089 ( 2 of 2257 genes )	0.00018 ( 6 of 34011 annotated genes )	0.04331	1	Mthfd1, Hdc,
GO:0007016	cytoskeletal anchoring at	0.00089 ( 2 of 2257 genes )	0.00018 ( 6 of 34011 annotated genes )	0.04331	1	Gypa, Tln1,
GO:0008635	activation of caspase act	0.00089 ( 2 of 2257 genes )	0.00018 ( 6 of 34011 annotated genes )	0.04331	1	Apaf1, Cycs,
GO:0009077	histidine family amino ac	0.00089 ( 2 of 2257 genes )	0.00018 ( 6 of 34011 annotated genes )	0.04331	1	Mthfd1, Hdc,
GO:0010544	negative regulation of pl	0.00089 ( 2 of 2257 genes )	0.00018 ( 6 of 34011 annotated genes )	0.04331	1	Pdgfa, Apoe,
GO:0010746	regulation of plasma memb	0.00089 ( 2 of 2257 genes )	0.00018 ( 6 of 34011 annotated genes )	0.04331	1	Thbs1, Acsl5,
GO:0010940	positive regulation of ne	0.00089 ( 2 of 2257 genes )	0.00018 ( 6 of 34011 annotated genes )	0.04331	1	Tnf, Tspo,
GO:0018126	protein hydroxylation	0.00089 ( 2 of 2257 genes )	0.00018 ( 6 of 34011 annotated genes )	0.04331	1	Jmjd6, Plod1,
GO:0019368	fatty acid elongation, un	0.00089 ( 2 of 2257 genes )	0.00018 ( 6 of 34011 annotated genes )	0.04331	1	Elovl3, Elovl2,
GO:0030579	ubiquitin-dependent SMAD	0.00089 ( 2 of 2257 genes )	0.00018 ( 6 of 34011 annotated genes )	0.04331	1	Tgfb1i1, Smurf1,
GO:0032020	ISG15-protein conjugation	0.00089 ( 2 of 2257 genes )	0.00018 ( 6 of 34011 annotated genes )	0.04331	1	Usp18, Isg15,
GO:0033600	negative regulation of ma	0.00089 ( 2 of 2257 genes )	0.00018 ( 6 of 34011 annotated genes )	0.04331	1	Robo1, Phb2,
GO:0035434	copper ion transmembrane	0.00089 ( 2 of 2257 genes )	0.00018 ( 6 of 34011 annotated genes )	0.04331	1	Slc31a2, Slc31a1,
GO:0042407	cristae formation	0.00089 ( 2 of 2257 genes )	0.00018 ( 6 of 34011 annotated genes )	0.04331	1	Afg3l2, Afg3l1,
GO:0042866	pyruvate biosynthetic pro	0.00089 ( 2 of 2257 genes )	0.00018 ( 6 of 34011 annotated genes )	0.04331	1	Agxt, Pkm2,
GO:0045627	positive regulation of T-	0.00089 ( 2 of 2257 genes )	0.00018 ( 6 of 34011 annotated genes )	0.04331	1	Ripk2, Ccr7,
GO:0046060	dATP metabolic process	0.00089 ( 2 of 2257 genes )	0.00018 ( 6 of 34011 annotated genes )	0.04331	1	Ak2, Guk1,
GO:0051014	actin filament severing	0.00089 ( 2 of 2257 genes )	0.00018 ( 6 of 34011 annotated genes )	0.04331	1	Gsn, Srgap2,
GO:0070266	necroptosis	0.00089 ( 2 of 2257 genes )	0.00018 ( 6 of 34011 annotated genes )	0.04331	1	Birc2, Tnf,
GO:0071731	response to nitric oxide	0.00089 ( 2 of 2257 genes )	0.00018 ( 6 of 34011 annotated genes )	0.04331	1	Ccr7, Egln1,
GO:0071803	positive regulation of po	0.00089 ( 2 of 2257 genes )	0.00018 ( 6 of 34011 annotated genes )	0.04331	1	Tnf, Rhoa,
GO:0090304	nucleic acid metabolic pr	0.10058 ( 227 of 2257 genes )	0.10308 ( 3506 of 34011 annotated genes )	0.04331	1	Nfe2l2, Dnase1l3, Mcm3, Mapkapk2, 4930447C04Rik, Sbno2, Ywhah, Ddx56, Asz1, Ets2, Xcl1, Rest, Tada2a, Gspt1, Cwc15, Jmjd6, Prpf4, Ikbkap, Zfp516, Nfkb1, Lhx5, Prpf6, Papd7, Nr5a2, Npas3, Dab2ip, 0610031J06Rik, Foxn3, Nlrc5, Stat1, Adam8, Tfdp2, Pycard, Rps6ka4, Esrp2, Tceb1, Il1a, Rnf141, Rbpj, Chaf1b, Nop10, 2700060E02Rik, Nr1i2, Lrrfip1, Snx6, Rnf4, Cycs, Gm14160, Hivep1, Plagl1, Edn1, Tlr2, Bn…
GO:0071902	positive regulation of pr	0.00753 ( 17 of 2257 genes )	0.00547 ( 186 of 34011 annotated genes )	0.04374	1	Pdgfa, Ptpn11, Dab2ip, Psen1, Ccr7, Adam8, Mif, Thbs1, Stk3, Chi3l1, Il1b, Tnf, Kit, Tlr1, Edn1, Map2k1, Psmd10,
GO:0002281	macrophage activation inv	0.00133 ( 3 of 2257 genes )	0.00041 ( 14 of 34011 annotated genes )	0.04409	1	Tlr2, Cx3cr1, Sbno2,
GO:0007520	myoblast fusion	0.00133 ( 3 of 2257 genes )	0.00041 ( 14 of 34011 annotated genes )	0.04409	1	Nphs1, Casp1, Myh9,
GO:0014829	vascular smooth muscle co	0.00133 ( 3 of 2257 genes )	0.00041 ( 14 of 34011 annotated genes )	0.04409	1	P2rx1, Map2k1, Edn1,
GO:0015693	magnesium ion transport	0.00133 ( 3 of 2257 genes )	0.00041 ( 14 of 34011 annotated genes )	0.04409	1	Zdhhc17, Magt1, Kcnj2,
GO:0032303	regulation of icosanoid s	0.00133 ( 3 of 2257 genes )	0.00041 ( 14 of 34011 annotated genes )	0.04409	1	Il1b, P2ry2, Mif,
GO:0032467	positive regulation of cy	0.00133 ( 3 of 2257 genes )	0.00041 ( 14 of 34011 annotated genes )	0.04409	1	Rhoa, Cspp1, Pkp4,
GO:0042572	retinol metabolic process	0.00133 ( 3 of 2257 genes )	0.00041 ( 14 of 34011 annotated genes )	0.04409	1	Retsat, Aldh1a1, Adh4,
GO:0043084	penile erection	0.00133 ( 3 of 2257 genes )	0.00041 ( 14 of 34011 annotated genes )	0.04409	1	Cnr1, Acvr2a, P2ry2,
GO:0043243	positive regulation of pr	0.00133 ( 3 of 2257 genes )	0.00041 ( 14 of 34011 annotated genes )	0.04409	1	Tnf, Bnip3, Plek,
GO:0046716	muscle cell homeostasis	0.00133 ( 3 of 2257 genes )	0.00041 ( 14 of 34011 annotated genes )	0.04409	1	Mtm1, Aldoa, Hif1a,
GO:0050716	positive regulation of in	0.00133 ( 3 of 2257 genes )	0.00041 ( 14 of 34011 annotated genes )	0.04409	1	Ccr7, Casp1, Pycard,
GO:0050718	positive regulation of in	0.00133 ( 3 of 2257 genes )	0.00041 ( 14 of 34011 annotated genes )	0.04409	1	Ccr7, Casp1, Pycard,
GO:0051482	elevation of cytosolic ca	0.00133 ( 3 of 2257 genes )	0.00041 ( 14 of 34011 annotated genes )	0.04409	1	Calca, Tgm2, Edn1,
GO:2000404	regulation of T cell migr	0.00133 ( 3 of 2257 genes )	0.00041 ( 14 of 34011 annotated genes )	0.04409	1	Ccr7, Xcl1, Adam8,
GO:2000241	regulation of reproductiv	0.00487 ( 11 of 2257 genes )	0.00312 ( 106 of 34011 annotated genes )	0.04421	1	Cnr1, Nupr1, Wdr77, Nr5a2, Ifit1, Ccl4, Tnf, P2ry2, Rest, Ppia, Plau,
GO:0001836	release of cytochrome c f	0.00266 ( 6 of 2257 genes )	0.00132 ( 45 of 34011 annotated genes )	0.0448	1	Bnip3, Parl, Tnfsf10, Fam162a, Bcl2l1, Psmd10,
GO:0051384	response to glucocorticoi	0.00266 ( 6 of 2257 genes )	0.00132 ( 45 of 34011 annotated genes )	0.0448	1	Agl, Tnf, Agxt, Adam9, Rest, Map2k1,
GO:0032652	regulation of interleukin	0.00222 ( 5 of 2257 genes )	0.00100 ( 34 of 34011 annotated genes )	0.04513	1	Calca, Ccr7, Casp1, Mefv, Pycard,
GO:0032755	positive regulation of in	0.00222 ( 5 of 2257 genes )	0.00100 ( 34 of 34011 annotated genes )	0.04513	1	Ripk2, Il1b, Tnf, Il1a, Tlr2,
GO:0006638	neutral lipid metabolic p	0.00399 ( 9 of 2257 genes )	0.00238 ( 81 of 34011 annotated genes )	0.04524	1	Ppap2a, Insig2, Ptpn11, Lmf1, Slc22a4, Ldlr, Apoe, Dgkh, Acsl5,
GO:0046883	regulation of hormone sec	0.00620 ( 14 of 2257 genes )	0.00429 ( 146 of 34011 annotated genes )	0.04531	1	Cnr1, Ptpn11, Niacr1, Cd38, Hmgcr, Il1b, Tnf, Ppp3cb, Acvr2a, Rfx6, Crh, Osm, Rest, Edn1,
GO:0030316	osteoclast differentiatio	0.00310 ( 7 of 2257 genes )	0.00168 ( 57 of 34011 annotated genes )	0.04637	1	Ccr1, Csf1, Tnf, Calca, 5730469M10Rik, Cd300lf, Adam8,
GO:0042542	response to hydrogen pero	0.00310 ( 7 of 2257 genes )	0.00168 ( 57 of 34011 annotated genes )	0.04637	1	Ppp1r15b, Bnip3, Epx, Prdx6, Glrx2, Adam9, Pld2,
GO:0043244	regulation of protein com	0.00310 ( 7 of 2257 genes )	0.00168 ( 57 of 34011 annotated genes )	0.04637	1	Gsn, Add2, Tnf, Epb4.9, Bnip3, Mtap1b, Plek,
GO:0071495	cellular response to endo	0.01374 ( 31 of 2257 genes )	0.01141 ( 388 of 34011 annotated genes )	0.04637	1	Mir148a, Kdm3a, Ptpn11, Mirlet7f-2, Nr5a2, Ptpn1, Dab2ip, Srsf3, Mir101b, Sva, Mir297-1, Stat1, Xcl1, Mir379, Bcl2l1, Ptpn2, Rest, Diap1, Nr1d2, Nr1i2, Stat3, Mir217, Apaf1, Il1b, Tnf, Mir216b, Mir669c, Mir365-1, Mapksp1, Ncoa1, Prkca,
GO:0010741	negative regulation of in	0.00443 ( 10 of 2257 genes )	0.00276 ( 94 of 34011 annotated genes )	0.0464	1	Tnip3, Dab2ip, Cnksr3, Xdh, Stat1, Pebp1, Rhoa, Dnaja3, Dusp6, Psmd10,
GO:0007204	elevation of cytosolic ca	0.00709 ( 16 of 2257 genes )	0.00512 ( 174 of 34011 annotated genes )	0.0471	1	Fkbp1a, Ccr1, Gimap5, Xcl1, P2ry2, C5ar1, Kdr, Diap1, Trdn, Cd38, Tgm2, Il1b, Cxcl1, Calca, Adm, Edn1,
GO:0051249	regulation of lymphocyte	0.00975 ( 22 of 2257 genes )	0.00759 ( 258 of 34011 annotated genes )	0.0471	1	Socs6, Pnp, Nck1, Ap3b1, Pdcd1lg2, Cd47, Gimap5, Ccr7, Lyst, Hsp90aa1, Adam8, Mif, Cd59b, Cd86, Fcgr2b, Cd38, Cd209a, Lgals1, Ripk2, Il1b, Dnaja3, Il2rg,
GO:0006487	protein N-linked glycosyl	0.00177 ( 4 of 2257 genes )	0.00071 ( 24 of 34011 annotated genes )	0.04769	1	Ddost, Rpn2, Dpagt1, Alg8,
GO:0007620	copulation	0.00177 ( 4 of 2257 genes )	0.00071 ( 24 of 34011 annotated genes )	0.04769	1	Cnr1, Acvr2a, P2rx1, P2ry2,
GO:0008299	isoprenoid biosynthetic p	0.00177 ( 4 of 2257 genes )	0.00071 ( 24 of 34011 annotated genes )	0.04769	1	Aldh1a1, Fdft1, Dpagt1, Hmgcr,
GO:0022406	membrane docking	0.00177 ( 4 of 2257 genes )	0.00071 ( 24 of 34011 annotated genes )	0.04769	1	Exoc6b, Plek, Rab8a, Exoc4,
GO:0035590	purinergic nucleotide rec	0.00177 ( 4 of 2257 genes )	0.00071 ( 24 of 34011 annotated genes )	0.04769	1	Niacr1, P2rx1, P2ry2, P2ry13,
GO:0006665	sphingolipid metabolic pr	0.00399 ( 9 of 2257 genes )	0.00241 ( 82 of 34011 annotated genes )	0.04831	1	Smpdl3b, Sgms2, Ppap2a, Agk, P2rx1, Asah2, Kit, Lass6, Cyr61,
GO:0009266	response to temperature s	0.00399 ( 9 of 2257 genes )	0.00241 ( 82 of 34011 annotated genes )	0.04831	1	Hsf3, Il1a, Accn3, Tcfec, Calca, l7Rn6, Dnaja3, Osm, Tgfb1i1,
GO:0030100	regulation of endocytosis	0.00576 ( 13 of 2257 genes )	0.00394 ( 134 of 34011 annotated genes )	0.04847	1	Clec7a, Fcgr2b, Ptpn1, Cd47, Fcgr3, Ppt1, Ccr7, Vamp8, Bcr, Cd14, Pld2, Sgip1, Prkca,
GO:0071845	cellular component disass	0.00576 ( 13 of 2257 genes )	0.00394 ( 134 of 34011 annotated genes )	0.04847	1	Epb4.9, Dnase1l3, Bnip3, Mtap1b, Ndel1, Ppt1, Apaf1, Gsn, Add2, Lamc1, Plek, Cycs, Gzma,
GO:0000904	cell morphogenesis involv	0.01684 ( 38 of 2257 genes )	0.01452 ( 494 of 34011 annotated genes )	0.0488	1	Egr2, Scn1b, Klf7, Dab2, Psen1, Ywhah, Vim, Lamc1, Fn1, Tnik, D930014E17Rik, Srgap2, Ndel1, Lamb1, Hif1a, Pou3f2, Dact2, Plod3, Ptpn11, Mtap1b, Dab2ip, Vsig1, Caprin1, Fzd1, Afg3l2, Loxl2, Myh9, Adam15, Lrp8, Tgfb1i1, Mif, Cyfip1, Gja1, Rbpj, Scarf1, Robo1, Ntng1, Prkca,
GO:0046635	positive regulation of al	0.00266 ( 6 of 2257 genes )	0.00135 ( 46 of 34011 annotated genes )	0.04909	1	Ripk2, Gimap5, Pnp, Ccr7, Ap3b1, Il2rg,
GO:0006486	protein glycosylation	0.00487 ( 11 of 2257 genes )	0.00318 ( 108 of 34011 annotated genes )	0.04948	1	Rpn1, Ddost, Pomt2, Fut11, Lmf1, St3gal5, Dpagt1, Alg8, Psen1, Rpn2, St3gal4,
GO:0006576	cellular biogenic amine m	0.00487 ( 11 of 2257 genes )	0.00318 ( 108 of 34011 annotated genes )	0.04948	1	Hdc, Sult1d1, Gch1, Aadat, Tdo2, Ldlr, Kynu, Ly6e, Pebp1, Odc1, Moxd1,
GO:0043413	macromolecule glycosylati	0.00487 ( 11 of 2257 genes )	0.00318 ( 108 of 34011 annotated genes )	0.04948	1	Rpn1, Ddost, Pomt2, Fut11, Lmf1, St3gal5, Dpagt1, Alg8, Psen1, Rpn2, St3gal4,
GO:0006497	protein lipidation	0.00310 ( 7 of 2257 genes )	0.00171 ( 58 of 34011 annotated genes )	0.0502	1	Zdhhc17, Abca1, Pigu, Alg9, Zdhhc5, Nmt1, Aipl1,
GO:0007127	meiosis I	0.00310 ( 7 of 2257 genes )	0.00171 ( 58 of 34011 annotated genes )	0.0502	1	Ddx4, Syce2, Myh9, Tex11, Syce1, Gm14160, Fmn2,
GO:0001933	negative regulation of pr	0.00399 ( 9 of 2257 genes )	0.00244 ( 83 of 34011 annotated genes )	0.05152	1	Cnksr3, Fkbp1a, Psen1, Xdh, Pebp1, Spred2, Ppap2b, Dusp6, Prkca,
GO:0006959	humoral immune response	0.00399 ( 9 of 2257 genes )	0.00244 ( 83 of 34011 annotated genes )	0.05152	1	Cd59b, Fcgr2b, Rbpj, C9, Tnf, Gimap5, Ccr7, Fcnb, Cfp,
GO:0019216	regulation of lipid metab	0.00753 ( 17 of 2257 genes )	0.00559 ( 190 of 34011 annotated genes )	0.05159	1	Cnr1, Pdgfa, Insig2, Il1a, Niacr1, Lmf1, Ldlr, Apoe, Ppp2r5a, Il1b, Gimap5, Tnf, Acsl5, Rbl1, Tspo, Cyr61, Rest,
GO:0048646	anatomical structure form	0.02525 ( 57 of 2257 genes )	0.02314 ( 787 of 34011 annotated genes )	0.05219	1	Anpep, Egr2, Psg22, Psen1, Cd44, Cyr61, Cysltr1, Hspg2, Egln1, Dusp6, Atp5b, Gpi1, Kdr, Thbs1, Stk3, Casp1, Ttn, Hif1a, Ripply2, Chi3l1, Ccl24, Aldh1a1, Jmjd6, Adam9, Smad5, Pdgfa, Lhx5, Ecsit, Fkbp1a, Fzd1, Stat1, Loxl2, Smad1, Myh9, Adam8, Cx3cr1, Lrp8, Adam15, Plau, Mmp19, Il1a, Erap1, Rbpj, Gja1, Cd34, Rab8a, Tgm2, Il1b, Apaf1, Nphs1, Robo1, Tbx2, Cx3cl1, Ccl12, Adm, Edn1, Prkca,
GO:0030855	epithelial cell different	0.00975 ( 22 of 2257 genes )	0.00767 ( 261 of 34011 annotated genes )	0.05223	1	Wdr77, Dsg4, Vsig1, Prlr, Abcb1b, Sprr3, Fzd1, Txnip, Sav1, Tgfb1i1, Hoxb13, Kdr, Il1a, Gja1, Rbpj, Hif1a, Xdh, Aimp2, Dact2, Plod3, Dmbt1, Map2k1,
GO:0006816	calcium ion transport	0.00930 ( 21 of 2257 genes )	0.00726 ( 247 of 34011 annotated genes )	0.05277	1	Grin3a, Homer1, Fkbp1a, Psen1, Ccr1, Ccl4, Gimap5, Xcl1, Atp2b4, Crh, Rest, Cysltr1, Diap1, Gja1, Trdn, P2rx1, Trpm2, Camk2g, Calca, Tspo, Icam1,
GO:0016053	organic acid biosynthetic	0.00930 ( 21 of 2257 genes )	0.00726 ( 247 of 34011 annotated genes )	0.05277	1	Acly, Insig2, Ch25h, Degs1, Bbox1, Tmem195, Scd2, Aldh18a1, Sc4mol, Mif, Mthfd1, Fasn, Elovl3, Agxt, Kynu, Lgsn, Pkm2, Far1, Elovl2, Prkab1, Edn1,
GO:0046394	carboxylic acid biosynthe	0.00930 ( 21 of 2257 genes )	0.00726 ( 247 of 34011 annotated genes )	0.05277	1	Acly, Insig2, Ch25h, Degs1, Bbox1, Tmem195, Scd2, Aldh18a1, Sc4mol, Mif, Mthfd1, Fasn, Elovl3, Agxt, Kynu, Lgsn, Pkm2, Far1, Elovl2, Prkab1, Edn1,
GO:0000002	mitochondrial genome main	0.00133 ( 3 of 2257 genes )	0.00044 ( 15 of 34011 annotated genes )	0.0528	1	Mrpl15, Dnaja3, Mrpl39,
GO:0002446	neutrophil mediated immun	0.00133 ( 3 of 2257 genes )	0.00044 ( 15 of 34011 annotated genes )	0.0528	1	Myo1f, Lyst, Bcr,
GO:0002524	hypersensitivity	0.00133 ( 3 of 2257 genes )	0.00044 ( 15 of 34011 annotated genes )	0.0528	1	Fcgr2b, Ccr7, Fcgr3,
GO:0002823	negative regulation of ad	0.00133 ( 3 of 2257 genes )	0.00044 ( 15 of 34011 annotated genes )	0.0528	1	Fcgr2b, Xcl1, Ppp3cb,
GO:0002883	regulation of hypersensit	0.00133 ( 3 of 2257 genes )	0.00044 ( 15 of 34011 annotated genes )	0.0528	1	Fcgr2b, Ccr7, Fcgr3,
GO:0006929	substrate-dependent cell	0.00133 ( 3 of 2257 genes )	0.00044 ( 15 of 34011 annotated genes )	0.0528	1	Robo1, Adam8, Atp5b,
GO:0007007	inner mitochondrial membr	0.00133 ( 3 of 2257 genes )	0.00044 ( 15 of 34011 annotated genes )	0.0528	1	Afg3l2, Afg3l1, Chchd3,
GO:0010575	positive regulation vascu	0.00133 ( 3 of 2257 genes )	0.00044 ( 15 of 34011 annotated genes )	0.0528	1	Il1b, Il1a, Hif1a,
GO:0010762	regulation of fibroblast	0.00133 ( 3 of 2257 genes )	0.00044 ( 15 of 34011 annotated genes )	0.0528	1	Thbs1, Ager, Zfp640,
GO:0010894	negative regulation of st	0.00133 ( 3 of 2257 genes )	0.00044 ( 15 of 34011 annotated genes )	0.0528	1	Insig2, Apoe, Rest,
GO:0015985	energy coupled proton tra	0.00133 ( 3 of 2257 genes )	0.00044 ( 15 of 34011 annotated genes )	0.0528	1	Atp5f1, Atp5o, Atp5b,
GO:0015986	ATP synthesis coupled pro	0.00133 ( 3 of 2257 genes )	0.00044 ( 15 of 34011 annotated genes )	0.0528	1	Atp5f1, Atp5o, Atp5b,
GO:0032106	positive regulation of re	0.00133 ( 3 of 2257 genes )	0.00044 ( 15 of 34011 annotated genes )	0.0528	1	Scoc, Larp1, Pafah1b2,
GO:0032109	positive regulation of re	0.00133 ( 3 of 2257 genes )	0.00044 ( 15 of 34011 annotated genes )	0.0528	1	Scoc, Larp1, Pafah1b2,
GO:0032494	response to peptidoglycan	0.00133 ( 3 of 2257 genes )	0.00044 ( 15 of 34011 annotated genes )	0.0528	1	Ripk2, Tlr2, C5ar1,
GO:0043537	negative regulation of bl	0.00133 ( 3 of 2257 genes )	0.00044 ( 15 of 34011 annotated genes )	0.0528	1	Thbs1, Csnk2b, Apoe,
GO:0045939	negative regulation of st	0.00133 ( 3 of 2257 genes )	0.00044 ( 15 of 34011 annotated genes )	0.0528	1	Insig2, Apoe, Rest,
GO:0050706	regulation of interleukin	0.00133 ( 3 of 2257 genes )	0.00044 ( 15 of 34011 annotated genes )	0.0528	1	Ccr7, Casp1, Pycard,
GO:0070193	synaptonemal complex orga	0.00133 ( 3 of 2257 genes )	0.00044 ( 15 of 34011 annotated genes )	0.0528	1	Syce2, Tex11, Syce1,
GO:0090023	positive regulation of ne	0.00133 ( 3 of 2257 genes )	0.00044 ( 15 of 34011 annotated genes )	0.0528	1	Ccr7, Xcl1, Edn1,
GO:0055080	cation homeostasis	0.01374 ( 31 of 2257 genes )	0.01156 ( 393 of 34011 annotated genes )	0.05327	1	Immt, Apoe, Fkbp1a, Psen1, Ccr1, Gimap5, Fbxl5, Xcl1, Atp6v0c, Csrp3, P2ry2, C5ar1, Atp5b, Kdr, Diap1, Trdn, Cd38, Nucb2, Hif1a, Tgm2, Ppt1, Il1b, Calca, Ager, Cxcl1, Sfxn1, Fech, Commd1, Adm, Edn1, Prkca,
GO:0007088	regulation of mitosis	0.00354 ( 8 of 2257 genes )	0.00209 ( 71 of 34011 annotated genes )	0.0533	1	Il1a, Il1b, Ywhah, Tnf, Pebp1, Ranbp1, Anapc10, Edn1,
GO:0010976	positive regulation of ne	0.00354 ( 8 of 2257 genes )	0.00209 ( 71 of 34011 annotated genes )	0.0533	1	Scarf1, Ppp2r5d, Cnr1, Scn1b, Dpysl3, Ndel1, P2ry2, Mif,
GO:0051783	regulation of nuclear div	0.00354 ( 8 of 2257 genes )	0.00209 ( 71 of 34011 annotated genes )	0.0533	1	Il1a, Il1b, Ywhah, Tnf, Pebp1, Ranbp1, Anapc10, Edn1,
GO:0007266	Rho protein signal transd	0.00709 ( 16 of 2257 genes )	0.00520 ( 177 of 34011 annotated genes )	0.05348	1	Pip5k1a, Rhoj, Tnfaip1, Apoe, Fgd5, Abca1, Rhoa, Ccr7, Prex1, Srgap2, Ndel1, Ttn, Pkp4, Ccl24, Dock4, Bcr,
GO:0001910	regulation of leukocyte m	0.00266 ( 6 of 2257 genes )	0.00138 ( 47 of 34011 annotated genes )	0.05362	1	Pvr, Gimap5, Pnp, Xcl1, Ppp3cb, Tap1,
GO:0003158	endothelium development	0.00266 ( 6 of 2257 genes )	0.00138 ( 47 of 34011 annotated genes )	0.05362	1	Kdr, Xdh, Csnk2b, Rbpj, Plod3, Abcb1b,
GO:0031960	response to corticosteroi	0.00266 ( 6 of 2257 genes )	0.00138 ( 47 of 34011 annotated genes )	0.05362	1	Agl, Tnf, Agxt, Adam9, Rest, Map2k1,
GO:0002443	leukocyte mediated immuni	0.00798 ( 18 of 2257 genes )	0.00603 ( 205 of 34011 annotated genes )	0.05371	1	Pnp, Fcgr3, Tap1, Rnf8, Gimap5, Xcl1, Lyst, Pld2, Fcgr2b, Pvr, Myo1f, Serpinb9, C9, Tnf, Ppp3cb, Icam1, Kit, Bcr,
GO:0042108	positive regulation of cy	0.00310 ( 7 of 2257 genes )	0.00173 ( 59 of 34011 annotated genes )	0.05422	1	Il1b, Thbs1, Tnf, Il1a, Tlr2, Fcgr3, Tlr1,
GO:0002026	regulation of the force o	0.00177 ( 4 of 2257 genes )	0.00074 ( 25 of 34011 annotated genes )	0.05426	1	Pebp1, Csrp3, Adm, Prkca,
GO:0006368	transcription elongation	0.00177 ( 4 of 2257 genes )	0.00074 ( 25 of 34011 annotated genes )	0.05426	1	Tceb1, Ikbkap, Hif1a, Map2k1,
GO:0007129	synapsis	0.00177 ( 4 of 2257 genes )	0.00074 ( 25 of 34011 annotated genes )	0.05426	1	Syce2, Tex11, Syce1, Gm14160,
GO:0070979	protein K11-linked ubiqui	0.00177 ( 4 of 2257 genes )	0.00074 ( 25 of 34011 annotated genes )	0.05426	1	Ube2e3, Rnf4, Anapc10, Anapc13,
GO:0032944	regulation of mononuclear	0.00620 ( 14 of 2257 genes )	0.00441 ( 150 of 34011 annotated genes )	0.05458	1	Cd59b, Cd86, Csf1, Fcgr2b, Pnp, Nck1, Cd38, Pdcd1lg2, Cd209a, Ripk2, Il1b, Ccr7, Dnaja3, Mif,
GO:0006403	RNA localization	0.00399 ( 9 of 2257 genes )	0.00247 ( 84 of 34011 annotated genes )	0.05486	1	Snupn, Fyttd1, Prpf6, Magohb, Stau1, Ncbp2, Xpo7, Hnrnpa3, Ddx39,
GO:0040007	growth	0.02437 ( 55 of 2257 genes )	0.02232 ( 759 of 34011 annotated genes )	0.0552	1	Tlr2, Dsg4, Ndufs3, Vps54, Dab2, Prlr, Nppa, Psen1, Ruvbl1, Ube2e3, Eno1, Cd44, Chst11, Cyr61, Mtpn, Osm, Hoxb13, Dusp6, Thbs1, Stk3, Cd38, Ndel1, Hif1a, Ppt1, Tnf, Pou3f2, Dmbt1, Psmd10, Csf1, Socs6, Nupr1, Ptpn11, Mtap1b, Dab2ip, Apoe, D7Ertd443e, Rhoa, Ly6e, Afg3l2, Pla2g2a, Sav1, Bcl2l1, Cyfip1, Plau, Rbpj, Gja1, Pkm2, Cish, Stat3, Robo1, Tbx2, Mll2, Zfp640, Adm, Edn1,
GO:0031098	stress-activated protein	0.00665 ( 15 of 2257 genes )	0.00482 ( 164 of 34011 annotated genes )	0.05532	1	Il1a, Stk3, Dusp19, Dab2ip, Ltbr, Hmgcr, Ripk2, Il1b, Nphs1, Tnf, Rhoa, Ccr7, Tnik, Edn1, Map2k1,
GO:0010595	positive regulation of en	0.00222 ( 5 of 2257 genes )	0.00106 ( 36 of 34011 annotated genes )	0.05565	1	Kdr, Thbs1, Amotl1, Ppap2b, Prkca,
GO:0043535	regulation of blood vesse	0.00222 ( 5 of 2257 genes )	0.00106 ( 36 of 34011 annotated genes )	0.05565	1	Thbs1, Csnk2b, Amotl1, Apoe, Prkca,
GO:0046834	lipid phosphorylation	0.00222 ( 5 of 2257 genes )	0.00106 ( 36 of 34011 annotated genes )	0.05565	1	Ip6k1, Inpp5b, Pip5kl1, Pip5k1a, Agk,
GO:0051187	cofactor catabolic proces	0.00222 ( 5 of 2257 genes )	0.00106 ( 36 of 34011 annotated genes )	0.05565	1	Blvrb, Mdh2, Suclg1, Aldh1l2, Cs,
GO:0051225	spindle assembly	0.00222 ( 5 of 2257 genes )	0.00106 ( 36 of 34011 annotated genes )	0.05565	1	Rhoa, Tubb5, Rnf4, Senp6, Kif3b,
GO:0045597	positive regulation of ce	0.01639 ( 37 of 2257 genes )	0.01426 ( 485 of 34011 annotated genes )	0.05652	1	Vim, Ccr7, Fndc3b, Acvr2a, Hsp90aa1, Cyr61, Kdr, Ndel1, Hif1a, Ripk2, Tnf, Calca, Tspo, Dmbt1, Il2rg, Csf1, Smad5, Pnp, Mtap1b, Ap3b1, Caprin1, Ccr1, Gimap5, Loxl2, Rhoa, Smad1, Adam8, Mif, Tgfb1i1, Rgs6, Scarf1, Il1b, Robo1, Ncoa1, Kit, Map2k1, Prkca,
GO:0015833	peptide transport	0.00665 ( 15 of 2257 genes )	0.00485 ( 165 of 34011 annotated genes )	0.05773	1	Cnr1, Ptpn11, Cd38, Tap1, Slco1b2, Hmgcr, Il1b, Abca1, Tnf, Ppp3cb, Slc15a5, Rfx6, Crh, Rest, Edn1,
GO:0071900	regulation of protein ser	0.01063 ( 24 of 2257 genes )	0.00861 ( 293 of 34011 annotated genes )	0.0578	1	Pdgfa, Ptpn11, Dab2ip, Apoe, Hmgcr, Psen1, Ccr7, Adam8, Spred2, Mif, Dusp6, Thbs1, Stk3, Dusp19, Chi3l1, Il1b, Tnf, Ccnh, Kit, Tlr1, Prkca, Psmd10, Edn1, Map2k1,
GO:0007015	actin filament organizati	0.00753 ( 17 of 2257 genes )	0.00567 ( 193 of 34011 annotated genes )	0.0581	1	Tmsb10, Nck1, Tnfaip1, Add2, Rhoa, Arhgap6, Plek, Prex1, Diap1, Epb4.9, Ttn, Ccl24, Gsn, Nphs1, Rnd1, Dpysl3, Myo1b,
GO:0010638	positive regulation of or	0.00753 ( 17 of 2257 genes )	0.00567 ( 193 of 34011 annotated genes )	0.0581	1	Bnip3, Mtap1b, Nck1, Ranbp1, Rhoa, Plek, Fam162a, Tnfsf10, Rps6ka4, Il1a, Ccl24, Il1b, Nphs1, Tnf, Pebp1, Ube2n, Edn1,
GO:0000387	spliceosomal snRNP assemb	0.00089 ( 2 of 2257 genes )	0.00021 ( 7 of 34011 annotated genes )	0.05834	1	Prpf6, Prpf31,
GO:0003159	morphogenesis of an endot	0.00089 ( 2 of 2257 genes )	0.00021 ( 7 of 34011 annotated genes )	0.05834	1	Csnk2b, Rbpj,
GO:0006089	lactate metabolic process	0.00089 ( 2 of 2257 genes )	0.00021 ( 7 of 34011 annotated genes )	0.05834	1	Hif1a, Ldha,
GO:0006101	citrate metabolic process	0.00089 ( 2 of 2257 genes )	0.00021 ( 7 of 34011 annotated genes )	0.05834	1	Acly, Cs,
GO:0006547	histidine metabolic proce	0.00089 ( 2 of 2257 genes )	0.00021 ( 7 of 34011 annotated genes )	0.05834	1	Mthfd1, Hdc,
GO:0006907	pinocytosis	0.00089 ( 2 of 2257 genes )	0.00021 ( 7 of 34011 annotated genes )	0.05834	1	Ppt1, Dab2,
GO:0006927	transformed cell apoptosi	0.00089 ( 2 of 2257 genes )	0.00021 ( 7 of 34011 annotated genes )	0.05834	1	Tnf, Fam162a,
GO:0009075	histidine family amino ac	0.00089 ( 2 of 2257 genes )	0.00021 ( 7 of 34011 annotated genes )	0.05834	1	Mthfd1, Hdc,
GO:0009452	RNA capping	0.00089 ( 2 of 2257 genes )	0.00021 ( 7 of 34011 annotated genes )	0.05834	1	Ftsjd2, Ncbp2,
GO:0016090	prenol metabolic process	0.00089 ( 2 of 2257 genes )	0.00021 ( 7 of 34011 annotated genes )	0.05834	1	Fdft1, Dpagt1,
GO:0030260	entry into host cell	0.00089 ( 2 of 2257 genes )	0.00021 ( 7 of 34011 annotated genes )	0.05834	1	Ace2, Icam1,
GO:0030388	fructose 1,6-bisphosphate	0.00089 ( 2 of 2257 genes )	0.00021 ( 7 of 34011 annotated genes )	0.05834	1	Aldoa, Aldoc,
GO:0033194	response to hydroperoxide	0.00089 ( 2 of 2257 genes )	0.00021 ( 7 of 34011 annotated genes )	0.05834	1	Cd38, Trpm2,
GO:0033483	gas homeostasis	0.00089 ( 2 of 2257 genes )	0.00021 ( 7 of 34011 annotated genes )	0.05834	1	Hif1a, Egln1,
GO:0034380	high-density lipoprotein	0.00089 ( 2 of 2257 genes )	0.00021 ( 7 of 34011 annotated genes )	0.05834	1	Abca1, Apoe,
GO:0034382	chylomicron remnant clear	0.00089 ( 2 of 2257 genes )	0.00021 ( 7 of 34011 annotated genes )	0.05834	1	Lmf1, Apoe,
GO:0042761	very long-chain fatty aci	0.00089 ( 2 of 2257 genes )	0.00021 ( 7 of 34011 annotated genes )	0.05834	1	Elovl3, Elovl2,
GO:0043312	neutrophil degranulation	0.00089 ( 2 of 2257 genes )	0.00021 ( 7 of 34011 annotated genes )	0.05834	1	Myo1f, Bcr,
GO:0044409	entry into host	0.00089 ( 2 of 2257 genes )	0.00021 ( 7 of 34011 annotated genes )	0.05834	1	Ace2, Icam1,
GO:0045116	protein neddylation	0.00089 ( 2 of 2257 genes )	0.00021 ( 7 of 34011 annotated genes )	0.05834	1	Rnf7, Nedd8,
GO:0046718	entry of virus into host	0.00089 ( 2 of 2257 genes )	0.00021 ( 7 of 34011 annotated genes )	0.05834	1	Ace2, Icam1,
GO:0048170	positive regulation of lo	0.00089 ( 2 of 2257 genes )	0.00021 ( 7 of 34011 annotated genes )	0.05834	1	Kdr, Kit,
GO:0048245	eosinophil chemotaxis	0.00089 ( 2 of 2257 genes )	0.00021 ( 7 of 34011 annotated genes )	0.05834	1	Ccl24, Ccl7,
GO:0051654	establishment of mitochon	0.00089 ( 2 of 2257 genes )	0.00021 ( 7 of 34011 annotated genes )	0.05834	1	Rhot1, Mtap1b,
GO:0051806	entry into cell of other	0.00089 ( 2 of 2257 genes )	0.00021 ( 7 of 34011 annotated genes )	0.05834	1	Ace2, Icam1,
GO:0051828	entry into other organism	0.00089 ( 2 of 2257 genes )	0.00021 ( 7 of 34011 annotated genes )	0.05834	1	Ace2, Icam1,
GO:0052126	movement in host environm	0.00089 ( 2 of 2257 genes )	0.00021 ( 7 of 34011 annotated genes )	0.05834	1	Ace2, Icam1,
GO:0052192	movement in environment o	0.00089 ( 2 of 2257 genes )	0.00021 ( 7 of 34011 annotated genes )	0.05834	1	Ace2, Icam1,
GO:0060334	regulation of interferon-	0.00089 ( 2 of 2257 genes )	0.00021 ( 7 of 34011 annotated genes )	0.05834	1	Nlrc5, Dnaja3,
GO:0061154	endothelial tube morphoge	0.00089 ( 2 of 2257 genes )	0.00021 ( 7 of 34011 annotated genes )	0.05834	1	Csnk2b, Rbpj,
GO:0071357	cellular response to type	0.00089 ( 2 of 2257 genes )	0.00021 ( 7 of 34011 annotated genes )	0.05834	1	Nlrc5, Ifit1,
GO:0071801	regulation of podosome as	0.00089 ( 2 of 2257 genes )	0.00021 ( 7 of 34011 annotated genes )	0.05834	1	Tnf, Rhoa,
GO:0071830	triglyceride-rich lipopro	0.00089 ( 2 of 2257 genes )	0.00021 ( 7 of 34011 annotated genes )	0.05834	1	Lmf1, Apoe,
GO:0072350	tricarboxylic acid metabo	0.00089 ( 2 of 2257 genes )	0.00021 ( 7 of 34011 annotated genes )	0.05834	1	Acly, Cs,
GO:0072567	chemokine (C-X-C motif) l	0.00089 ( 2 of 2257 genes )	0.00021 ( 7 of 34011 annotated genes )	0.05834	1	Tnf, Mif,
GO:0090224	regulation of spindle org	0.00089 ( 2 of 2257 genes )	0.00021 ( 7 of 34011 annotated genes )	0.05834	1	Rnf4, Senp6,
GO:2000341	regulation of chemokine (	0.00089 ( 2 of 2257 genes )	0.00021 ( 7 of 34011 annotated genes )	0.05834	1	Tnf, Mif,
GO:0000377	RNA splicing, via transes	0.00399 ( 9 of 2257 genes )	0.00250 ( 85 of 34011 annotated genes )	0.05834	1	Prpf6, Prpf31, Ptbp1, Prpf4, Jmjd6, Cwc15, Sf3a1, Lsm3, Ddx39,
GO:0000398	nuclear mRNA splicing, vi	0.00399 ( 9 of 2257 genes )	0.00250 ( 85 of 34011 annotated genes )	0.05834	1	Prpf6, Prpf31, Ptbp1, Prpf4, Jmjd6, Cwc15, Sf3a1, Lsm3, Ddx39,
GO:0071844	cellular component assemb	0.02836 ( 64 of 2257 genes )	0.02652 ( 902 of 34011 annotated genes )	0.05837	1	Tmsb10, Nck1, Tuba8, Prdx6, Psen1, Atg13, Ccr7, Arhgap6, Hsp90aa1, Capg, Ttn, Tex11, Senp6, Ndufs4, Gsn, Plod3, Psmd10, Prpf6, Rps2, Tnfaip1, Tln1, Add2, Rhoa, Smad1, Plek, Kif3b, Cyfip1, Diap1, Chaf1b, Cd34, Myo3a, Rab8a, Prpf31, Nphs1, Cenpj, Dpysl3, Myo1b, Rnf4, Dnaja3, Syce1, Clint1, Edn1, Prkca, Syce2, Prlr, Pomp, Lamc1, Fn1, H2afz, Vdac2, Kdr, Prex1, Srgap2, Epb4.9, Ccl24, Pdgfa, Psmg1, Pip…
GO:0002224	toll-like receptor signal	0.00266 ( 6 of 2257 genes )	0.00141 ( 48 of 34011 annotated genes )	0.0584	1	Tnip3, Ripk2, Cd86, Tlr2, Mapkapk2, Trim30a,
GO:0007044	cell-substrate junction a	0.00266 ( 6 of 2257 genes )	0.00141 ( 48 of 34011 annotated genes )	0.0584	1	Kdr, Pip5k1a, Lamc1, Arhgap6, Fn1, Tln1,
GO:0046330	positive regulation of JN	0.00266 ( 6 of 2257 genes )	0.00141 ( 48 of 34011 annotated genes )	0.0584	1	Ripk2, Il1b, Tnf, Il1a, Stk3, Ltbr,
GO:0050810	regulation of steroid bio	0.00266 ( 6 of 2257 genes )	0.00141 ( 48 of 34011 annotated genes )	0.0584	1	Tnf, Insig2, Il1a, Tspo, Apoe, Rest,
GO:0050830	defense response to Gram-	0.00266 ( 6 of 2257 genes )	0.00141 ( 48 of 34011 annotated genes )	0.0584	1	Ripk2, Tnf, Myo1f, Tlr2, Gbp6, C5ar1,
GO:0090317	negative regulation of in	0.00266 ( 6 of 2257 genes )	0.00141 ( 48 of 34011 annotated genes )	0.0584	1	Txn1, Fzd1, Rangap1, Dab2ip, Psmd10, Litaf,
GO:0034612	response to tumor necrosi	0.00310 ( 7 of 2257 genes )	0.00176 ( 60 of 34011 annotated genes )	0.05844	1	Tnf, Gch1, Stat1, Dab2ip, Tnfrsf1b, Adam9, Pycard,
GO:0002757	immune response-activatin	0.00576 ( 13 of 2257 genes )	0.00406 ( 138 of 34011 annotated genes )	0.05872	1	Tnip3, Clec7a, Cd86, Tlr2, Cd38, Mapkapk2, Trim30a, Psen1, Ripk2, Ccr7, Adam8, C5ar1, Ube2n,
GO:0002520	immune system development	0.01949 ( 44 of 2257 genes )	0.01744 ( 593 of 34011 annotated genes )	0.05882	1	Spnb1, Cd300lf, Rnf8, Psen1, Ccr7, Acvr2a, Hsp90aa1, Ebp, Cd86, Kdr, Stk3, Hif1a, Lgals1, Ripk2, Tnf, Calca, Jmjd6, Sfxn1, Ppp3cb, Bpgm, Il2rg, Nfkb1, Csf1, Smad5, Pnp, Trim10, Ap3b1, Ctnnbl1, Crip2, Ccr1, Gimap5, Add2, Myh9, Adam8, Hoxb4, Rbpj, 5730469M10Rik, Cd34, Ltbr, Fech, Kit, Dnaja3, Zfp36l2, Prkca,
GO:0055082	cellular chemical homeost	0.02038 ( 46 of 2257 genes )	0.01835 ( 624 of 34011 annotated genes )	0.0593	1	Immt, Egr2, Scn1b, Bnip3, Ckb, Psen1, Xcl1, Atp6v0c, Csrp3, C5ar1, Atp5b, Kdr, Cnr1, Cd38, Slc6a12, Hif1a, Ppt1, Calca, Pou3f2, Rhag, Commd1, Tspo, Apoe, Hmgcr, Fkbp1a, Ccr1, Gimap5, Mir379, Afg3l2, P2ry2, Bcl2l1, Diap1, Scn2a1, Gja1, Trdn, P2rx1, Nucb2, Tgm2, Il1b, Cxcl1, Ndrg1, Icam1, Cx3cl1, Adm, Edn1, Prkca,
GO:0034622	cellular macromolecular c	0.01506 ( 34 of 2257 genes )	0.01300 ( 442 of 34011 annotated genes )	0.05952	1	Tmsb10, Nck1, Tuba8, Prlr, Pomp, H2afz, Hsp90aa1, Vdac2, Prex1, Epb4.9, Ttn, Senp6, Ccl24, Gsn, Ndufs4, Psmd10, Psmg1, Prpf6, Rps2, Mtap1b, Ssna1, Fkbp1a, Add2, Rhoa, Smad1, Diap1, Prpf31, Fgg, Nphs1, Cenpj, Tubb5, Rnf4, Dnaja3, Clint1,
GO:0016337	cell-cell adhesion	0.01063 ( 24 of 2257 genes )	0.00864 ( 294 of 34011 annotated genes )	0.05963	1	Clec7a, Dsg4, Slc7a11, Cd47, Psen1, Plek, Cd44, Myh9, Adam8, Cyr61, Pvr, Cd34, Lgals1, Il1b, Cdh5, Tnf, Calca, Robo1, Icam1, Fat3, Cx3cl1, Ppap2b, Map2k1, Prkca,
GO:0030003	cellular cation homeostas	0.01196 ( 27 of 2257 genes )	0.00994 ( 338 of 34011 annotated genes )	0.05971	1	Immt, Apoe, Fkbp1a, Psen1, Ccr1, Gimap5, Xcl1, Atp6v0c, Csrp3, P2ry2, C5ar1, Atp5b, Kdr, Diap1, Trdn, Cd38, Nucb2, Hif1a, Tgm2, Ppt1, Il1b, Calca, Cxcl1, Commd1, Adm, Edn1, Prkca,
GO:0072507	divalent inorganic cation	0.01019 ( 23 of 2257 genes )	0.00823 ( 280 of 34011 annotated genes )	0.06065	1	Immt, Apoe, Fkbp1a, Psen1, Ccr1, Gimap5, Xcl1, Csrp3, P2ry2, C5ar1, Kdr, Diap1, Trdn, Cd38, Nucb2, Tgm2, Il1b, Calca, Cxcl1, Ager, Adm, Edn1, Prkca,
GO:0019439	aromatic compound catabol	0.00177 ( 4 of 2257 genes )	0.00076 ( 26 of 34011 annotated genes )	0.06128	1	Aadat, Tdo2, Kynu, Aldh1l2,
GO:0033209	tumor necrosis factor-med	0.00177 ( 4 of 2257 genes )	0.00076 ( 26 of 34011 annotated genes )	0.06128	1	Tnf, Stat1, Tnfrsf1b, Pycard,
GO:0048260	positive regulation of re	0.00177 ( 4 of 2257 genes )	0.00076 ( 26 of 34011 annotated genes )	0.06128	1	Ppt1, Ccr7, Sgip1, Pld2,
GO:0001912	positive regulation of le	0.00222 ( 5 of 2257 genes )	0.00109 ( 37 of 34011 annotated genes )	0.0614	1	Pvr, Gimap5, Pnp, Xcl1, Tap1,
GO:0030032	lamellipodium assembly	0.00222 ( 5 of 2257 genes )	0.00109 ( 37 of 34011 annotated genes )	0.0614	1	Srgap2, Nck1, Hsp90aa1, Kit, Cyfip1,
GO:0043500	muscle adaptation	0.00222 ( 5 of 2257 genes )	0.00109 ( 37 of 34011 annotated genes )	0.0614	1	Nppa, Mtpn, Akap13, Prkca, Edn1,
GO:0070988	demethylation	0.00222 ( 5 of 2257 genes )	0.00109 ( 37 of 34011 annotated genes )	0.0614	1	Kdm5c, Kdm3a, Ppme1, Jmjd6, Cyp51,
GO:0071407	cellular response to orga	0.00222 ( 5 of 2257 genes )	0.00109 ( 37 of 34011 annotated genes )	0.0614	1	Il1b, Smad5, Tnf, Smad1, Crh,
GO:0001101	response to acid	0.00576 ( 13 of 2257 genes )	0.00409 ( 139 of 34011 annotated genes )	0.0615	1	Ces2c, Mirlet7f-2, Accn3, Mir101b, Mir217, Tnf, Mir216b, Mir669c, Mir379, Mir365-1, Mapksp1, Eno1, Bcl2l1,
GO:0009310	amine catabolic process	0.00399 ( 9 of 2257 genes )	0.00253 ( 86 of 34011 annotated genes )	0.06195	1	Mthfd1, Hdc, Bckdk, Aadat, Agxt, Tdo2, Kynu, BC026590, Lao1,
GO:0051224	negative regulation of pr	0.00399 ( 9 of 2257 genes )	0.00253 ( 86 of 34011 annotated genes )	0.06195	1	Txn1, Fzd1, Tnf, Rangap1, Dab2ip, Ywhab, Cx3cl1, Psmd10, Litaf,
GO:0006909	phagocytosis	0.00443 ( 10 of 2257 genes )	0.00291 ( 99 of 34011 annotated genes )	0.06195	1	Clec7a, Thbs1, Fcgr2b, Cd47, Fcgr3, Tgm2, Abca1, Ccr7, Jmjd6, Bcr,
GO:0006855	drug transmembrane transp	0.00133 ( 3 of 2257 genes )	0.00047 ( 16 of 34011 annotated genes )	0.06227	1	Abcg2, Slco1b2, Abcb1b,
GO:0006910	phagocytosis, recognition	0.00133 ( 3 of 2257 genes )	0.00047 ( 16 of 34011 annotated genes )	0.06227	1	Clec7a, Jmjd6, Fcgr3,
GO:0009220	pyrimidine ribonucleotide	0.00133 ( 3 of 2257 genes )	0.00047 ( 16 of 34011 annotated genes )	0.06227	1	Ctps, Nme4, Nme5,
GO:0010869	regulation of receptor bi	0.00133 ( 3 of 2257 genes )	0.00047 ( 16 of 34011 annotated genes )	0.06227	1	Ankrd13c, Hif1a, Edn1,
GO:0016241	regulation of macroautoph	0.00133 ( 3 of 2257 genes )	0.00047 ( 16 of 34011 annotated genes )	0.06227	1	Scoc, Larp1, Pafah1b2,
GO:0019934	cGMP-mediated signaling	0.00133 ( 3 of 2257 genes )	0.00047 ( 16 of 34011 annotated genes )	0.06227	1	Fzd1, Thbs1, Apoe,
GO:0033032	regulation of myeloid cel	0.00133 ( 3 of 2257 genes )	0.00047 ( 16 of 34011 annotated genes )	0.06227	1	Niacr1, Cd44, Mif,
GO:0042375	quinone cofactor metaboli	0.00133 ( 3 of 2257 genes )	0.00047 ( 16 of 34011 annotated genes )	0.06227	1	Coq5, Adh4, Hmgcr,
GO:0043403	skeletal muscle tissue re	0.00133 ( 3 of 2257 genes )	0.00047 ( 16 of 34011 annotated genes )	0.06227	1	Gja1, Pkm2, Plau,
GO:0044070	regulation of anion trans	0.00133 ( 3 of 2257 genes )	0.00047 ( 16 of 34011 annotated genes )	0.06227	1	Tnf, Vdac3, Vdac2,
GO:0061082	myeloid leukocyte cytokin	0.00133 ( 3 of 2257 genes )	0.00047 ( 16 of 34011 annotated genes )	0.06227	1	Tlr2, Kit, Mif,
GO:0070168	negative regulation of bi	0.00133 ( 3 of 2257 genes )	0.00047 ( 16 of 34011 annotated genes )	0.06227	1	Ccr1, Aspn, Hif1a,
GO:2000401	regulation of lymphocyte	0.00133 ( 3 of 2257 genes )	0.00047 ( 16 of 34011 annotated genes )	0.06227	1	Ccr7, Xcl1, Adam8,
GO:0014706	striated muscle tissue de	0.01019 ( 23 of 2257 genes )	0.00826 ( 281 of 34011 annotated genes )	0.06259	1	Homer1, Fkbp1a, Hmgcr, Rhoa, Ly6e, Afg3l2, Csrp3, Sav1, Hspg2, Egln1, Psma6, Gphn, Flnb, Myl6, Rbpj, Gja1, Ttn, Col19a1, Tsc22d3, Pdzrn3, Nphs1, Tbx2, Dnaja3,
GO:0002705	positive regulation of le	0.00310 ( 7 of 2257 genes )	0.00179 ( 61 of 34011 annotated genes )	0.06286	1	Pvr, Gimap5, Tnf, Pnp, Xcl1, Fcgr3, Tap1,
GO:0002708	positive regulation of ly	0.00310 ( 7 of 2257 genes )	0.00179 ( 61 of 34011 annotated genes )	0.06286	1	Pvr, Gimap5, Tnf, Pnp, Xcl1, Fcgr3, Tap1,
GO:0070167	regulation of biomineral	0.00310 ( 7 of 2257 genes )	0.00179 ( 61 of 34011 annotated genes )	0.06286	1	Ccr1, Bglap, Gja1, Acvr2a, Bglap-rs1, Aspn, Hif1a,
GO:0045595	regulation of cell differ	0.03057 ( 69 of 2257 genes )	0.02896 ( 985 of 34011 annotated genes )	0.06307	1	Scn1b, Med14, Psen1, Ywhah, Mir133b, Ccr7, Hsp90aa1, Cyr61, Rest, Lgals1, Ripk2, Ppp2r5d, Tnf, Pou3f2, Nphp3, Tspo, Il2rg, Dpysl2, Dab2ip, Ccr1, Rhoa, Loxl2, Smad1, Adam8, P2ry2, Rbpj, Rgs6, Dpysl3, Prkca, Edn1, Prlr, Vim, Fndc3b, Acvr2a, Tnik, Dusp6, Kdr, Prex1, Cnr1, Ndel1, Hif1a, Mir217, Calca, Dmbt1, Csf1, Ldb2, Smad5, Pnp, Mtap1b, Ap3b1, Caprin1, Sox21, Ptbp1, Gimap5, Pla2g2a, Sav1, Lrp8, Mi…
GO:0030097	hemopoiesis	0.01728 ( 39 of 2257 genes )	0.01529 ( 520 of 34011 annotated genes )	0.06312	1	Spnb1, Cd300lf, Psen1, Ccr7, Acvr2a, Hsp90aa1, Ebp, Kdr, Stk3, Hif1a, Lgals1, Ripk2, Tnf, Calca, Jmjd6, Sfxn1, Ppp3cb, Bpgm, Il2rg, Csf1, Smad5, Pnp, Ap3b1, Trim10, Crip2, Ccr1, Gimap5, Add2, Myh9, Adam8, Hoxb4, 5730469M10Rik, Rbpj, Cd34, Fech, Kit, Dnaja3, Zfp36l2, Prkca,
GO:0016358	dendrite development	0.00532 ( 12 of 2257 genes )	0.00370 ( 126 of 34011 annotated genes )	0.06314	1	Prex1, Srgap2, Klf7, Mtap1b, Grin3a, Caprin1, Ywhah, Scarf1, Robo1, Rhoa, Tnik, Lrp8,
GO:0007179	transforming growth facto	0.00487 ( 11 of 2257 genes )	0.00332 ( 113 of 34011 annotated genes )	0.0645	1	Hpgd, Thbs1, Smad5, Smurf1, Smad1, Snx6, Chst11, Adam9, Aspn, Tgfb1i1, Skor2,
GO:0000187	activation of MAPK activi	0.00399 ( 9 of 2257 genes )	0.00256 ( 87 of 34011 annotated genes )	0.06571	1	Thbs1, Ptpn11, Dab2ip, Il1b, Tnf, Ccr7, Adam8, Kit, Map2k1,
GO:0009719	response to endogenous st	0.01905 ( 43 of 2257 genes )	0.01714 ( 583 of 34011 annotated genes )	0.06585	1	Mir148a, Kdm3a, Agl, Egr2, Mirlet7f-2, Ptpn1, Srsf3, Sva, Mir297-1, Xcl1, Ccr7, Cd44, Rest, Agxt, Cd38, Nr1d2, Mir217, Tnf, Mapksp1, Mir365-1, Adam9, Ptpn11, Nr5a2, Dab2ip, Serpina3n, Mir101b, Stat1, Mir379, Bcl2l1, Ptpn2, Pld2, Diap1, Stat3, Nr1i2, Apaf1, Il1b, Mir216b, Mir669c, Mll2, Ggh, Ncoa1, Map2k1, Prkca,
GO:0007265	Ras protein signal transd	0.01152 ( 26 of 2257 genes )	0.00961 ( 327 of 34011 annotated genes )	0.06646	1	Csf1, Pip5k1a, Rhoj, Dab2ip, Tnfaip1, Tbc1d8, Apoe, Fgd5, Abca1, Rhoa, Ccr7, Mapkapk5, Shoc2, Iqsec2, Prex1, Tbc1d2b, Tbc1d5, Srgap2, Ndel1, Ttn, Pkp4, Ccl24, Dock4, Rap2c, Bcr, Map2k1,
GO:0032637	interleukin-8 production	0.00222 ( 5 of 2257 genes )	0.00112 ( 38 of 34011 annotated genes )	0.06747	1	Il1b, Tnf, Calca, Tlr2, Chi3l1,
GO:0048259	regulation of receptor-me	0.00222 ( 5 of 2257 genes )	0.00112 ( 38 of 34011 annotated genes )	0.06747	1	Ppt1, Ccr7, Prkca, Sgip1, Pld2,
GO:0031099	regeneration	0.00310 ( 7 of 2257 genes )	0.00182 ( 62 of 34011 annotated genes )	0.06748	1	Scarf1, Gja1, Ndel1, Pkm2, Adm, Plau, Mif,
GO:0045639	positive regulation of my	0.00310 ( 7 of 2257 genes )	0.00182 ( 62 of 34011 annotated genes )	0.06748	1	Ccr1, Csf1, Tnf, Calca, Acvr2a, Hif1a, Prkca,
GO:0072503	cellular divalent inorgan	0.00975 ( 22 of 2257 genes )	0.00791 ( 269 of 34011 annotated genes )	0.06781	1	Immt, Apoe, Fkbp1a, Psen1, Ccr1, Gimap5, Xcl1, Csrp3, P2ry2, C5ar1, Kdr, Diap1, Trdn, Cd38, Nucb2, Tgm2, Il1b, Calca, Cxcl1, Adm, Edn1, Prkca,
GO:0070663	regulation of leukocyte p	0.00620 ( 14 of 2257 genes )	0.00456 ( 155 of 34011 annotated genes )	0.06789	1	Cd59b, Cd86, Csf1, Fcgr2b, Pnp, Nck1, Cd38, Pdcd1lg2, Cd209a, Ripk2, Il1b, Ccr7, Dnaja3, Mif,
GO:0002688	regulation of leukocyte c	0.00266 ( 6 of 2257 genes )	0.00147 ( 50 of 34011 annotated genes )	0.06869	1	Ccr1, Ccr7, Xcl1, Cx3cl1, Cmklr1, Edn1,
GO:0030195	negative regulation of bl	0.00177 ( 4 of 2257 genes )	0.00079 ( 27 of 34011 annotated genes )	0.06877	1	Thbs1, Pdgfa, Cd34, Apoe,
GO:0031102	neuron projection regener	0.00177 ( 4 of 2257 genes )	0.00079 ( 27 of 34011 annotated genes )	0.06877	1	Scarf1, Ndel1, Adm, Mif,
GO:0034381	plasma lipoprotein partic	0.00177 ( 4 of 2257 genes )	0.00079 ( 27 of 34011 annotated genes )	0.06877	1	Lmf1, Ldlr, Apoe, Ehd1,
GO:0042993	positive regulation of tr	0.00177 ( 4 of 2257 genes )	0.00079 ( 27 of 34011 annotated genes )	0.06877	1	Il1b, Tnf, Tlr2, Tmem173,
GO:0043370	regulation of CD4-positiv	0.00177 ( 4 of 2257 genes )	0.00079 ( 27 of 34011 annotated genes )	0.06877	1	Ripk2, Gimap5, Ccr7, Il2rg,
GO:0043502	regulation of muscle adap	0.00177 ( 4 of 2257 genes )	0.00079 ( 27 of 34011 annotated genes )	0.06877	1	Mtpn, Akap13, Prkca, Edn1,
GO:0051055	negative regulation of li	0.00177 ( 4 of 2257 genes )	0.00079 ( 27 of 34011 annotated genes )	0.06877	1	Pdgfa, Insig2, Apoe, Rest,
GO:0071346	cellular response to inte	0.00177 ( 4 of 2257 genes )	0.00079 ( 27 of 34011 annotated genes )	0.06877	1	Nlrc5, Stat1, Gbp6, Dnaja3,
GO:2000107	negative regulation of le	0.00177 ( 4 of 2257 genes )	0.00079 ( 27 of 34011 annotated genes )	0.06877	1	Ccr7, Cd44, Serpinb9, Mif,
GO:0090092	regulation of transmembra	0.00576 ( 13 of 2257 genes )	0.00418 ( 142 of 34011 annotated genes )	0.07034	1	Thbs1, Rbpj, Fkbp1a, Smurf1, Fzd1, Csnk2b, Snx6, Acvr2a, Chst11, Cyr61, Aspn, Tgfb1i1, Skor2,
GO:0043254	regulation of protein com	0.00709 ( 16 of 2257 genes )	0.00541 ( 184 of 34011 annotated genes )	0.07064	1	Tmsb10, Mtap1b, Nck1, Add2, Rhoa, Plek, Vdac2, Prex1, Epb4.9, Xaf1, Senp6, Nphs1, Ccl24, Gsn, Tnf, Rnf4,
GO:0002703	regulation of leukocyte m	0.00487 ( 11 of 2257 genes )	0.00338 ( 115 of 34011 annotated genes )	0.07125	1	Pvr, Fcgr2b, Pnp, Fcgr3, Tap1, Tnf, Gimap5, Xcl1, Ppp3cb, Bcr, Pld2,
GO:0008643	carbohydrate transport	0.00487 ( 11 of 2257 genes )	0.00338 ( 115 of 34011 annotated genes )	0.07125	1	Hk2, Slc35b1, Slc2a1, Slc37a3, Il1b, Tnf, Pea15a, Slc35a5, Prkca, Edn1, Mif,
GO:0002820	negative regulation of ad	0.00133 ( 3 of 2257 genes )	0.00050 ( 17 of 34011 annotated genes )	0.07245	1	Fcgr2b, Xcl1, Ppp3cb,
GO:0009394	2'-deoxyribonucleotide me	0.00133 ( 3 of 2257 genes )	0.00050 ( 17 of 34011 annotated genes )	0.07245	1	Ak2, Pnp, Guk1,
GO:0010002	cardioblast differentiati	0.00133 ( 3 of 2257 genes )	0.00050 ( 17 of 34011 annotated genes )	0.07245	1	Tbx2, Rbpj, Rest,
GO:0019363	pyridine nucleotide biosy	0.00133 ( 3 of 2257 genes )	0.00050 ( 17 of 34011 annotated genes )	0.07245	1	Pnp, Nampt, Kynu,
GO:0030212	hyaluronan metabolic proc	0.00133 ( 3 of 2257 genes )	0.00050 ( 17 of 34011 annotated genes )	0.07245	1	Il1b, Cd44, Itih3,
GO:0042402	cellular biogenic amine c	0.00133 ( 3 of 2257 genes )	0.00050 ( 17 of 34011 annotated genes )	0.07245	1	Aadat, Tdo2, Kynu,
GO:0042832	defense response to proto	0.00133 ( 3 of 2257 genes )	0.00050 ( 17 of 34011 annotated genes )	0.07245	1	Gbp6, Lyst, Iigp1,
GO:0050704	regulation of interleukin	0.00133 ( 3 of 2257 genes )	0.00050 ( 17 of 34011 annotated genes )	0.07245	1	Ccr7, Casp1, Pycard,
GO:0072525	pyridine-containing compo	0.00133 ( 3 of 2257 genes )	0.00050 ( 17 of 34011 annotated genes )	0.07245	1	Pnp, Nampt, Kynu,
GO:0072678	T cell migration	0.00133 ( 3 of 2257 genes )	0.00050 ( 17 of 34011 annotated genes )	0.07245	1	Ccr7, Xcl1, Adam8,
GO:0051640	organelle localization	0.00532 ( 12 of 2257 genes )	0.00379 ( 129 of 34011 annotated genes )	0.07267	1	Rrs1, Rhot1, Mtap1b, Ndel1, Psen1, Nudc, Pinx1, Dync1li2, Myh9, Mtm1, Fmn2, Map2k1,
GO:0002764	immune response-regulatin	0.00576 ( 13 of 2257 genes )	0.00420 ( 143 of 34011 annotated genes )	0.07346	1	Tnip3, Clec7a, Cd86, Tlr2, Cd38, Mapkapk2, Trim30a, Psen1, Ripk2, Ccr7, Adam8, C5ar1, Ube2n,
GO:0010517	regulation of phospholipa	0.00354 ( 8 of 2257 genes )	0.00223 ( 76 of 34011 annotated genes )	0.07366	1	Gpr139, Tgm2, Ppt1, Calca, Plek, Arhgap6, Cyr61, Edn1,
GO:0000272	polysaccharide catabolic	0.00222 ( 5 of 2257 genes )	0.00115 ( 39 of 34011 annotated genes )	0.07386	1	Gns, Agl, Cd44, Pygl, Chi3l1,
GO:0002709	regulation of T cell medi	0.00222 ( 5 of 2257 genes )	0.00115 ( 39 of 34011 annotated genes )	0.07386	1	Pvr, Pnp, Xcl1, Ppp3cb, Tap1,
GO:0071695	anatomical structure matu	0.00222 ( 5 of 2257 genes )	0.00115 ( 39 of 34011 annotated genes )	0.07386	1	Cdh5, Rhoa, Dsg4, Rbpj, Psen1,
GO:0002444	myeloid leukocyte mediate	0.00266 ( 6 of 2257 genes )	0.00150 ( 51 of 34011 annotated genes )	0.07421	1	Myo1f, Lyst, Fcgr3, Bcr, Kit, Pld2,
GO:0010827	regulation of glucose tra	0.00266 ( 6 of 2257 genes )	0.00150 ( 51 of 34011 annotated genes )	0.07421	1	Il1b, Hk2, Tnf, Pea15a, Prkca, Mif,
GO:0031341	regulation of cell killin	0.00266 ( 6 of 2257 genes )	0.00150 ( 51 of 34011 annotated genes )	0.07421	1	Pvr, Gimap5, Pnp, Xcl1, Ppp3cb, Tap1,
GO:0000413	protein peptidyl-prolyl i	0.00089 ( 2 of 2257 genes )	0.00024 ( 8 of 34011 annotated genes )	0.07485	1	Fkbp1a, Ppia,
GO:0001810	regulation of type I hype	0.00089 ( 2 of 2257 genes )	0.00024 ( 8 of 34011 annotated genes )	0.07485	1	Fcgr2b, Fcgr3,
GO:0002035	brain renin-angiotensin s	0.00089 ( 2 of 2257 genes )	0.00024 ( 8 of 34011 annotated genes )	0.07485	1	Ace2, Mif,
GO:0002282	microglial cell activatio	0.00089 ( 2 of 2257 genes )	0.00024 ( 8 of 34011 annotated genes )	0.07485	1	Tlr2, Cx3cr1,
GO:0002577	regulation of antigen pro	0.00089 ( 2 of 2257 genes )	0.00024 ( 8 of 34011 annotated genes )	0.07485	1	Thbs1, Ccr7,
GO:0002925	positive regulation of hu	0.00089 ( 2 of 2257 genes )	0.00024 ( 8 of 34011 annotated genes )	0.07485	1	Gimap5, Tnf,
GO:0006165	nucleoside diphosphate ph	0.00089 ( 2 of 2257 genes )	0.00024 ( 8 of 34011 annotated genes )	0.07485	1	Nme4, Nme5,
GO:0006172	ADP biosynthetic process	0.00089 ( 2 of 2257 genes )	0.00024 ( 8 of 34011 annotated genes )	0.07485	1	Ak2, Atp5b,
GO:0006208	pyrimidine base catabolic	0.00089 ( 2 of 2257 genes )	0.00024 ( 8 of 34011 annotated genes )	0.07485	1	Dpysl3, Dpysl2,
GO:0010819	regulation of T cell chem	0.00089 ( 2 of 2257 genes )	0.00024 ( 8 of 34011 annotated genes )	0.07485	1	Ccr7, Xcl1,
GO:0010820	positive regulation of T	0.00089 ( 2 of 2257 genes )	0.00024 ( 8 of 34011 annotated genes )	0.07485	1	Ccr7, Xcl1,
GO:0016068	type I hypersensitivity	0.00089 ( 2 of 2257 genes )	0.00024 ( 8 of 34011 annotated genes )	0.07485	1	Fcgr2b, Fcgr3,
GO:0019059	initiation of viral infec	0.00089 ( 2 of 2257 genes )	0.00024 ( 8 of 34011 annotated genes )	0.07485	1	Ace2, Icam1,
GO:0033089	positive regulation of T	0.00089 ( 2 of 2257 genes )	0.00024 ( 8 of 34011 annotated genes )	0.07485	1	Adam8, Il2rg,
GO:0034111	negative regulation of ho	0.00089 ( 2 of 2257 genes )	0.00024 ( 8 of 34011 annotated genes )	0.07485	1	Adam8, Map2k1,
GO:0035414	negative regulation of ca	0.00089 ( 2 of 2257 genes )	0.00024 ( 8 of 34011 annotated genes )	0.07485	1	Fzd1, Dab2ip,
GO:0042738	exogenous drug catabolic	0.00089 ( 2 of 2257 genes )	0.00024 ( 8 of 34011 annotated genes )	0.07485	1	Cyp2c65, Nr1i2,
GO:0042921	glucocorticoid receptor s	0.00089 ( 2 of 2257 genes )	0.00024 ( 8 of 34011 annotated genes )	0.07485	1	Ywhah, Ipo13,
GO:0045070	positive regulation of vi	0.00089 ( 2 of 2257 genes )	0.00024 ( 8 of 34011 annotated genes )	0.07485	1	Ifit1, Nr5a2,
GO:0045080	positive regulation of ch	0.00089 ( 2 of 2257 genes )	0.00024 ( 8 of 34011 annotated genes )	0.07485	1	Il1b, Tnf,
GO:0045410	positive regulation of in	0.00089 ( 2 of 2257 genes )	0.00024 ( 8 of 34011 annotated genes )	0.07485	1	Il1b, Tlr1,
GO:0045589	regulation of regulatory	0.00089 ( 2 of 2257 genes )	0.00024 ( 8 of 34011 annotated genes )	0.07485	1	Gimap5, Il2rg,
GO:0046037	GMP metabolic process	0.00089 ( 2 of 2257 genes )	0.00024 ( 8 of 34011 annotated genes )	0.07485	1	Guk1, Gmps,
GO:0048242	epinephrine secretion	0.00089 ( 2 of 2257 genes )	0.00024 ( 8 of 34011 annotated genes )	0.07485	1	Ly6e, Crh,
GO:0050961	detection of temperature	0.00089 ( 2 of 2257 genes )	0.00024 ( 8 of 34011 annotated genes )	0.07485	1	Calca, Accn3,
GO:0050965	detection of temperature	0.00089 ( 2 of 2257 genes )	0.00024 ( 8 of 34011 annotated genes )	0.07485	1	Calca, Accn3,
GO:0051290	protein heterotetrameriza	0.00089 ( 2 of 2257 genes )	0.00024 ( 8 of 34011 annotated genes )	0.07485	1	Rrm1, Aldoc,
GO:0051382	kinetochore assembly	0.00089 ( 2 of 2257 genes )	0.00024 ( 8 of 34011 annotated genes )	0.07485	1	Rnf4, Senp6,
GO:0055091	phospholipid homeostasis	0.00089 ( 2 of 2257 genes )	0.00024 ( 8 of 34011 annotated genes )	0.07485	1	Abca1, Lyst,
GO:0060330	regulation of response to	0.00089 ( 2 of 2257 genes )	0.00024 ( 8 of 34011 annotated genes )	0.07485	1	Nlrc5, Dnaja3,
GO:0060371	regulation of atrial card	0.00089 ( 2 of 2257 genes )	0.00024 ( 8 of 34011 annotated genes )	0.07485	1	Scn1b, Gja1,
GO:0060856	establishment of blood-br	0.00089 ( 2 of 2257 genes )	0.00024 ( 8 of 34011 annotated genes )	0.07485	1	Ttpa, Abcb1b,
GO:0061081	positive regulation of my	0.00089 ( 2 of 2257 genes )	0.00024 ( 8 of 34011 annotated genes )	0.07485	1	Tlr2, Mif,
GO:0061337	cardiac conduction	0.00089 ( 2 of 2257 genes )	0.00024 ( 8 of 34011 annotated genes )	0.07485	1	Scn1b, Gja1,
GO:0071800	podosome assembly	0.00089 ( 2 of 2257 genes )	0.00024 ( 8 of 34011 annotated genes )	0.07485	1	Tnf, Rhoa,
GO:0006820	anion transport	0.00665 ( 15 of 2257 genes )	0.00506 ( 172 of 34011 annotated genes )	0.07663	1	Clcn7, Slco1a4, Agxt, Clns1a, Clic3, Slco6b1, Slc4a1, Slco1b2, Psen1, Ano3, Tnf, Vdac3, Vdac2, Clca6, Slc13a1,
GO:0043406	positive regulation of MA	0.00576 ( 13 of 2257 genes )	0.00423 ( 144 of 34011 annotated genes )	0.07667	1	Thbs1, Pdgfa, Ptpn11, Dab2ip, Psen1, Il1b, Tnf, Ccr7, Adam8, Kit, Map2k1, Mif, Edn1,
GO:0007205	activation of protein kin	0.00177 ( 4 of 2257 genes )	0.00082 ( 28 of 34011 annotated genes )	0.0767	1	Dgkh, Agk, Cish, Edn1,
GO:0007595	lactation	0.00177 ( 4 of 2257 genes )	0.00082 ( 28 of 34011 annotated genes )	0.0767	1	Xdh, Csn3, Prlr, Hif1a,
GO:0021846	cell proliferation in for	0.00177 ( 4 of 2257 genes )	0.00082 ( 28 of 34011 annotated genes )	0.0767	1	Lhx5, Pou3f2, Fabp7, Emx2,
GO:0030968	endoplasmic reticulum unf	0.00177 ( 4 of 2257 genes )	0.00082 ( 28 of 34011 annotated genes )	0.0767	1	Nfe2l2, Ptpn1, Ero1l, Dnajc3,
GO:0034620	cellular response to unfo	0.00177 ( 4 of 2257 genes )	0.00082 ( 28 of 34011 annotated genes )	0.0767	1	Nfe2l2, Ptpn1, Ero1l, Dnajc3,
GO:0043470	regulation of carbohydrat	0.00177 ( 4 of 2257 genes )	0.00082 ( 28 of 34011 annotated genes )	0.0767	1	Pgam1, Hif1a, Mif, Ier3,
GO:0043471	regulation of cellular ca	0.00177 ( 4 of 2257 genes )	0.00082 ( 28 of 34011 annotated genes )	0.0767	1	Pgam1, Hif1a, Mif, Ier3,
GO:0010594	regulation of endothelial	0.00310 ( 7 of 2257 genes )	0.00188 ( 64 of 34011 annotated genes )	0.0773	1	Kdr, Thbs1, Csnk2b, Amotl1, Apoe, Ppap2b, Prkca,
GO:0048534	hemopoietic or lymphoid o	0.01817 ( 41 of 2257 genes )	0.01647 ( 560 of 34011 annotated genes )	0.07738	1	Spnb1, Cd300lf, Psen1, Ccr7, Acvr2a, Hsp90aa1, Ebp, Kdr, Stk3, Hif1a, Lgals1, Ripk2, Tnf, Calca, Jmjd6, Sfxn1, Ppp3cb, Bpgm, Il2rg, Nfkb1, Csf1, Smad5, Pnp, Ap3b1, Trim10, Crip2, Ccr1, Gimap5, Add2, Myh9, Adam8, Hoxb4, Rbpj, 5730469M10Rik, Cd34, Ltbr, Fech, Kit, Dnaja3, Zfp36l2, Prkca,
GO:0070647	protein modification by s	0.01506 ( 34 of 2257 genes )	0.01332 ( 453 of 34011 annotated genes )	0.07752	1	Rnf8, Nedd8, Psen1, Smurf1, Fbxl5, Ube2e3, Cops3, Senp1, Sumo3, Senp6, Rnf115, Usp17l5, Pdzrn3, Ripk2, Uba5, Commd1, Ube2n, Psmd10, Pcnp, Birc2, Rnf7, Dub1, Rnf180, Tnfaip1, Fkbp1a, Anapc10, Usp25, Cops4, Rnf213, Trim30a, Aimp2, Rnf4, Dnaja3, Anapc13,
GO:0003012	muscle system process	0.00753 ( 17 of 2257 genes )	0.00591 ( 201 of 34011 annotated genes )	0.07816	1	Smad5, Myl6, Mybpc2, Scn1b, Gja1, Homer1, P2rx1, Ttn, Aldoa, Nppa, Akap13, Fkbp1a, Calca, Mtpn, Prkca, Edn1, Map2k1,
GO:0050678	regulation of epithelial	0.00753 ( 17 of 2257 genes )	0.00591 ( 201 of 34011 annotated genes )	0.07816	1	Prl, Wdr77, Dab2ip, Phb2, Apoe, Stat1, Pla2g2a, Sav1, Plau, Thbs1, Kdr, Ccl24, Xdh, Vip, Robo1, Aimp1, Prkca,
GO:0007167	enzyme linked receptor pr	0.01905 ( 43 of 2257 genes )	0.01741 ( 592 of 34011 annotated genes )	0.07923	1	Mirlet7f-2, Dsg4, Ptpn1, Prlr, Nppa, Mapkapk2, Srsf3, Psen1, Smurf1, Txnip, Acvr2a, Chst11, Cyr61, Skor2, Dusp6, Thbs1, Kdr, Hif1a, Ppp2r5d, Csnk2b, Bcr, Adam9, Hpgd, Pdgfa, Smad5, Ptpn11, Dab2ip, Ecsit, Ssna1, Fkbp1a, Fzd1, Smad1, Ptpn2, Tgfb1i1, Rbpj, Stat3, Il1b, Snx6, Kit, Dnaja3, Zfp640, Aspn, Prkca,
GO:0022402	cell cycle process	0.02437 ( 55 of 2257 genes )	0.02290 ( 779 of 34011 annotated genes )	0.07956	1	Bub1b, Syce2, Mapkapk2, Rnf8, Ywhah, Ruvbl1, Asz1, Ranbp1, Cspp1, Eif4e, Osm, Fmn2, Thbs1, Rrs1, Npat, Klf11, Tex11, Senp6, Obfc2a, Pinx1, Tnf, Rbm7, Ddx4, Ptpn11, Papd7, D7Ertd443e, Taf2, Rhoa, Myh9, Meig1, Anapc10, Bcl2l1, Kif3b, Mif, Nsun2, Il1a, Cdc123, Cts7, Csnk2a1, Camk2g, Pkp4, Lsm10, Nudc, Il1b, Pebp1, Cenpj, Tubb5, Mapre2, Rnf4, Ndrg1, Gm14160, Syce1, Edn1, Anapc13, Map2k1,
GO:0030099	myeloid cell differentiat	0.00886 ( 20 of 2257 genes )	0.00720 ( 245 of 34011 annotated genes )	0.07975	1	Csf1, Smad5, Cd300lf, Trim10, Psen1, Ccr1, Gimap5, Acvr2a, Myh9, Adam8, 5730469M10Rik, Hif1a, Tnf, Calca, Jmjd6, Sfxn1, Bpgm, Fech, Kit, Prkca,
GO:0002260	lymphocyte homeostasis	0.00266 ( 6 of 2257 genes )	0.00153 ( 52 of 34011 annotated genes )	0.07997	1	Gimap5, Ppp3cb, Cd44, Dnaja3, Hif1a, Mif,
GO:0032088	negative regulation of NF	0.00266 ( 6 of 2257 genes )	0.00153 ( 52 of 34011 annotated genes )	0.07997	1	Nlrc5, Dab2ip, Dnaja3, Commd1, Psmd10, Cmklr1,
GO:0033673	negative regulation of ki	0.00576 ( 13 of 2257 genes )	0.00426 ( 145 of 34011 annotated genes )	0.07997	1	Dusp19, Dab2ip, Apoe, Hmgcr, Psen1, Ppp2r5a, Prpsap1, Il1b, Dnaja3, Spred2, Prkca, Dusp6, Dnajc3,
GO:0031396	regulation of protein ubi	0.00443 ( 10 of 2257 genes )	0.00306 ( 104 of 34011 annotated genes )	0.08054	1	Sumo3, Fkbp1a, Psen1, Smurf1, Ripk2, Aimp2, Ube2n, Commd1, Dnaja3, Psmd10,
GO:0000060	protein import into nucle	0.00222 ( 5 of 2257 genes )	0.00118 ( 40 of 34011 annotated genes )	0.08057	1	Txn1, Tnf, Hsp90aa1, Tmem173, Sec61b,
GO:0002763	positive regulation of my	0.00222 ( 5 of 2257 genes )	0.00118 ( 40 of 34011 annotated genes )	0.08057	1	Ccr1, Csf1, Tnf, Calca, Prkca,
GO:0016236	macroautophagy	0.00222 ( 5 of 2257 genes )	0.00118 ( 40 of 34011 annotated genes )	0.08057	1	Scoc, Atg13, Larp1, Pafah1b2, Psen1,
GO:0030148	sphingolipid biosynthetic	0.00222 ( 5 of 2257 genes )	0.00118 ( 40 of 34011 annotated genes )	0.08057	1	Sgms2, Agk, P2rx1, Lass6, Cyr61,
GO:0060711	labyrinthine layer develo	0.00222 ( 5 of 2257 genes )	0.00118 ( 40 of 34011 annotated genes )	0.08057	1	Rbpj, Cyr61, Adm, Map2k1, Egln1,
GO:0051480	cytosolic calcium ion hom	0.00709 ( 16 of 2257 genes )	0.00553 ( 188 of 34011 annotated genes )	0.08193	1	Fkbp1a, Ccr1, Gimap5, Xcl1, P2ry2, C5ar1, Kdr, Diap1, Trdn, Cd38, Tgm2, Il1b, Cxcl1, Calca, Adm, Edn1,
GO:0002698	negative regulation of im	0.00310 ( 7 of 2257 genes )	0.00191 ( 65 of 34011 annotated genes )	0.08251	1	Cd59b, Ifit1, Fcgr2b, Xcl1, Ppp3cb, Bcr, Tap1,
GO:0006720	isoprenoid metabolic proc	0.00310 ( 7 of 2257 genes )	0.00191 ( 65 of 34011 annotated genes )	0.08251	1	Cyp2c65, Retsat, Aldh1a1, Fdft1, Dpagt1, Adh4, Hmgcr,
GO:0042098	T cell proliferation	0.00532 ( 12 of 2257 genes )	0.00388 ( 132 of 34011 annotated genes )	0.08307	1	Cd59b, Cd86, Psmb10, Pnp, Nck1, Pdcd1lg2, Cd209a, Fkbp1a, Il1b, Ripk2, Ccr7, Dnaja3,
GO:0050801	ion homeostasis	0.02038 ( 46 of 2257 genes )	0.01885 ( 641 of 34011 annotated genes )	0.0832	1	Immt, Egr2, Scn1b, Bnip3, Ckb, Psen1, Fbxl5, Xcl1, Atp6v0c, Csrp3, C5ar1, Atp5b, Kdr, Cnr1, Cd38, Hif1a, Ppt1, Calca, Pou3f2, Sfxn1, Rhag, Commd1, Tspo, Apoe, Fkbp1a, Ccr1, Gimap5, Afg3l2, P2ry2, Bcl2l1, Diap1, Scn2a1, Gja1, Trdn, P2rx1, Nucb2, Tgm2, Il1b, Cxcl1, Ager, Fech, Ndrg1, Cx3cl1, Adm, Edn1, Prkca,
GO:0006000	fructose metabolic proces	0.00133 ( 3 of 2257 genes )	0.00053 ( 18 of 34011 annotated genes )	0.08333	1	Pfkfb3, Aldoa, Aldoc,
GO:0006586	indolalkylamine metabolic	0.00133 ( 3 of 2257 genes )	0.00053 ( 18 of 34011 annotated genes )	0.08333	1	Aadat, Tdo2, Kynu,
GO:0007128	meiotic prophase I	0.00133 ( 3 of 2257 genes )	0.00053 ( 18 of 34011 annotated genes )	0.08333	1	Ddx4, Syce2, Syce1,
GO:0009218	pyrimidine ribonucleotide	0.00133 ( 3 of 2257 genes )	0.00053 ( 18 of 34011 annotated genes )	0.08333	1	Ctps, Nme4, Nme5,
GO:0032731	positive regulation of in	0.00133 ( 3 of 2257 genes )	0.00053 ( 18 of 34011 annotated genes )	0.08333	1	Ccr7, Casp1, Pycard,
GO:0032925	regulation of activin rec	0.00133 ( 3 of 2257 genes )	0.00053 ( 18 of 34011 annotated genes )	0.08333	1	Csnk2b, Acvr2a, Fkbp1a,
GO:0033028	myeloid cell apoptosis	0.00133 ( 3 of 2257 genes )	0.00053 ( 18 of 34011 annotated genes )	0.08333	1	Niacr1, Cd44, Mif,
GO:0042346	positive regulation of NF	0.00133 ( 3 of 2257 genes )	0.00053 ( 18 of 34011 annotated genes )	0.08333	1	Il1b, Tnf, Tlr2,
GO:0042430	indole-containing compoun	0.00133 ( 3 of 2257 genes )	0.00053 ( 18 of 34011 annotated genes )	0.08333	1	Aadat, Tdo2, Kynu,
GO:0045824	negative regulation of in	0.00133 ( 3 of 2257 genes )	0.00053 ( 18 of 34011 annotated genes )	0.08333	1	Ccr1, Tap1, Trafd1,
GO:0048525	negative regulation of vi	0.00133 ( 3 of 2257 genes )	0.00053 ( 18 of 34011 annotated genes )	0.08333	1	Ifit1, Tnf, Oas1a,
GO:0048820	hair follicle maturation	0.00133 ( 3 of 2257 genes )	0.00053 ( 18 of 34011 annotated genes )	0.08333	1	Dsg4, Rbpj, Psen1,
GO:0051324	prophase	0.00133 ( 3 of 2257 genes )	0.00053 ( 18 of 34011 annotated genes )	0.08333	1	Ddx4, Syce2, Syce1,
GO:0051646	mitochondrion localizatio	0.00133 ( 3 of 2257 genes )	0.00053 ( 18 of 34011 annotated genes )	0.08333	1	Rhot1, Mtap1b, Mtm1,
GO:0048872	homeostasis of number of	0.00753 ( 17 of 2257 genes )	0.00597 ( 203 of 34011 annotated genes )	0.08381	1	Csf1, Smad5, Vps54, Trim10, Gimap5, Cd44, Acvr2a, Mif, Niacr1, Hif1a, Jmjd6, Bpgm, Fech, Ppp3cb, Sfxn1, Kit, Dnaja3,
GO:0022415	viral reproductive proces	0.00443 ( 10 of 2257 genes )	0.00309 ( 105 of 34011 annotated genes )	0.08462	1	Nr5a2, Tap1, Ifit1, Tnf, Ccl4, Ace2, Icam1, Bcl2l1, Rest, Ppia,
GO:0042129	regulation of T cell prol	0.00443 ( 10 of 2257 genes )	0.00309 ( 105 of 34011 annotated genes )	0.08462	1	Cd59b, Cd86, Pnp, Nck1, Pdcd1lg2, Cd209a, Il1b, Ripk2, Ccr7, Dnaja3,
GO:0060191	regulation of lipase acti	0.00443 ( 10 of 2257 genes )	0.00309 ( 105 of 34011 annotated genes )	0.08462	1	Gpr139, Lmf1, Tgm2, Fkbp1a, Ppt1, Calca, Plek, Arhgap6, Cyr61, Edn1,
GO:0006692	prostanoid metabolic proc	0.00177 ( 4 of 2257 genes )	0.00085 ( 29 of 34011 annotated genes )	0.08506	1	Hpgd, Ptgr1, Mif, Edn1,
GO:0006693	prostaglandin metabolic p	0.00177 ( 4 of 2257 genes )	0.00085 ( 29 of 34011 annotated genes )	0.08506	1	Hpgd, Ptgr1, Mif, Edn1,
GO:0006892	post-Golgi vesicle-mediat	0.00177 ( 4 of 2257 genes )	0.00085 ( 29 of 34011 annotated genes )	0.08506	1	Chic2, Blzf1, Slc30a6, Vps29,
GO:0030834	regulation of actin filam	0.00177 ( 4 of 2257 genes )	0.00085 ( 29 of 34011 annotated genes )	0.08506	1	Gsn, Add2, Epb4.9, Plek,
GO:0032006	regulation of TOR signali	0.00177 ( 4 of 2257 genes )	0.00085 ( 29 of 34011 annotated genes )	0.08506	1	Kdr, Mapksp1, Mapkapk5, Hif1a,
GO:0045104	intermediate filament cyt	0.00177 ( 4 of 2257 genes )	0.00085 ( 29 of 34011 annotated genes )	0.08506	1	Vim, Vps54, Ndel1, Mtm1,
GO:0048265	response to pain	0.00177 ( 4 of 2257 genes )	0.00085 ( 29 of 34011 annotated genes )	0.08506	1	Gch1, Calca, Tspo, Osm,
GO:0021700	developmental maturation	0.00665 ( 15 of 2257 genes )	0.00515 ( 175 of 34011 annotated genes )	0.08584	1	Kdr, Dsg4, Rbpj, Gja1, Hif1a, Psen1, Scarf1, Cdh5, Mir133b, Calca, Rhoa, Rnd1, Pebp1, Catsperb, Hoxb13,
GO:0006672	ceramide metabolic proces	0.00266 ( 6 of 2257 genes )	0.00156 ( 53 of 34011 annotated genes )	0.08597	1	Sgms2, Ppap2a, Agk, P2rx1, Lass6, Cyr61,
GO:0051781	positive regulation of ce	0.00266 ( 6 of 2257 genes )	0.00156 ( 53 of 34011 annotated genes )	0.08597	1	Il1b, Pdgfa, Rhoa, Il1a, Cspp1, Pkp4,
GO:0014070	response to organic cycli	0.00487 ( 11 of 2257 genes )	0.00350 ( 119 of 34011 annotated genes )	0.08606	1	Cnr1, Smad5, Casp1, Nedd8, Fkbp1a, Il1b, Tnf, Smad1, Bcl2l1, Crh, Pld2,
GO:0051291	protein heterooligomeriza	0.00399 ( 9 of 2257 genes )	0.00271 ( 92 of 34011 annotated genes )	0.08661	1	Birc2, Gch1, Rrm1, Pcbd2, P2rx1, Ywhab, Prkab1, Aldoc, Map2k1,
GO:0070925	organelle assembly	0.00399 ( 9 of 2257 genes )	0.00271 ( 92 of 34011 annotated genes )	0.08661	1	Rps2, Cd34, Senp6, Psen1, Atg13, Rhoa, Tubb5, Rnf4, Kif3b,
GO:0033157	regulation of intracellul	0.00576 ( 13 of 2257 genes )	0.00432 ( 147 of 34011 annotated genes )	0.08683	1	Txn1, Ptpn11, Tlr2, Dab2ip, Tmem30a, Litaf, Il1b, Fzd1, Rangap1, Tnf, Hsp90aa1, Tmem173, Psmd10,
GO:0071702	organic substance transpo	0.01595 ( 36 of 2257 genes )	0.01438 ( 489 of 34011 annotated genes )	0.08752	1	Hk2, Slc7a11, Slc36a4, Psen1, Hdlbp, Atp10a, Slc38a11, Thbs1, Cnr1, Slc35b1, Agxt, Atp11a, Slc22a4, Slc37a3, Tnf, Slc35a5, Slco1a4, Fcgr3, Apoe, Abca1, Ly6e, Acsl5, Slc23a2, P2ry2, Crh, Mif, Slc2a1, P2rx1, Ldlr, Slco1b2, Il1b, Pea15a, Slc44a1, Nat3, Edn1, Prkca,
GO:0006584	catecholamine metabolic p	0.00222 ( 5 of 2257 genes )	0.00121 ( 41 of 34011 annotated genes )	0.08758	1	Hdc, Sult1d1, Gch1, Ly6e, Moxd1,
GO:0009712	catechol metabolic proces	0.00222 ( 5 of 2257 genes )	0.00121 ( 41 of 34011 annotated genes )	0.08758	1	Hdc, Sult1d1, Gch1, Ly6e, Moxd1,
GO:0031343	positive regulation of ce	0.00222 ( 5 of 2257 genes )	0.00121 ( 41 of 34011 annotated genes )	0.08758	1	Pvr, Gimap5, Pnp, Xcl1, Tap1,
GO:0034311	diol metabolic process	0.00222 ( 5 of 2257 genes )	0.00121 ( 41 of 34011 annotated genes )	0.08758	1	Hdc, Sult1d1, Gch1, Ly6e, Moxd1,
GO:0045576	mast cell activation	0.00222 ( 5 of 2257 genes )	0.00121 ( 41 of 34011 annotated genes )	0.08758	1	Cnr1, Ndrg1, Fcgr3, Kit, Pld2,
GO:0046324	regulation of glucose imp	0.00222 ( 5 of 2257 genes )	0.00121 ( 41 of 34011 annotated genes )	0.08758	1	Hk2, Tnf, Pea15a, Prkca, Mif,
GO:0046467	membrane lipid biosynthet	0.00222 ( 5 of 2257 genes )	0.00121 ( 41 of 34011 annotated genes )	0.08758	1	Sgms2, Agk, P2rx1, Lass6, Cyr61,
GO:0007368	determination of left/rig	0.00354 ( 8 of 2257 genes )	0.00232 ( 79 of 34011 annotated genes )	0.08786	1	Tbx2, Rbpj, Gja1, Nphp3, Acvr2a, Hif1a, Ripply2, Psen1,
GO:0045580	regulation of T cell diff	0.00354 ( 8 of 2257 genes )	0.00232 ( 79 of 34011 annotated genes )	0.08786	1	Ripk2, Gimap5, Pnp, Ccr7, Ap3b1, Hsp90aa1, Adam8, Il2rg,
GO:0060193	positive regulation of li	0.00354 ( 8 of 2257 genes )	0.00232 ( 79 of 34011 annotated genes )	0.08786	1	Gpr139, Lmf1, Tgm2, Calca, Plek, Arhgap6, Cyr61, Edn1,
GO:0019218	regulation of steroid met	0.00310 ( 7 of 2257 genes )	0.00194 ( 66 of 34011 annotated genes )	0.08791	1	Tnf, Insig2, Il1a, Lmf1, Tspo, Apoe, Rest,
GO:0032943	mononuclear cell prolifer	0.00709 ( 16 of 2257 genes )	0.00559 ( 190 of 34011 annotated genes )	0.08798	1	Cd59b, Cd86, Csf1, Fcgr2b, Psmb10, Pnp, Nck1, Cd38, Pdcd1lg2, Cd209a, Fkbp1a, Ripk2, Il1b, Ccr7, Dnaja3, Mif,
GO:0010468	regulation of gene expres	0.08551 ( 193 of 2257 genes )	0.08894 ( 3025 of 34011 annotated genes )	0.08872	1	Nfe2l2, Mapkapk2, 4930447C04Rik, Sbno2, Ywhah, Asz1, Mir133b, Ets2, Xcl1, Eif4e, Rest, Tada2a, Jmjd6, Ikbkap, Eif3k, Zfp516, Nfkb1, Lhx5, Prpf6, Nr5a2, Npas3, Dab2ip, 0610031J06Rik, Foxn3, Nlrc5, Stat1, Adam8, Tfdp2, Emx2, Pycard, Rps6ka4, Esrp2, Tceb1, Il1a, Rnf141, Rbpj, Chaf1b, 2700060E02Rik, Nr1i2, Lrrfip1, Fech, Snx6, Rnf4, Mir34c, Hivep1, Plagl1, Edn1, Tlr2, Bnip3, Nedd8, Mtpn, Txn1, Thbs1,…
GO:0008285	negative regulation of ce	0.01506 ( 34 of 2257 genes )	0.01350 ( 459 of 34011 annotated genes )	0.08878	1	Pdcd1lg2, Phb2, Rest, Thbs1, Stk3, Klf11, Tnf, Tspo, Nupr1, Wdr77, Dab2ip, Apoe, Stat1, Smad1, Slfn2, Pla2g2a, Sav1, Fcgr2b, Eef1e1, Il1a, Gja1, Rbpj, Il1b, Xdh, Cdh5, Aimp2, Vip, Robo1, Aimp1, Leprel1, Dnaja3, Adm, Map2k1, Prkca,
GO:0051301	cell division	0.01418 ( 32 of 2257 genes )	0.01261 ( 429 of 34011 annotated genes )	0.08989	1	Bub1b, Syce2, Rnf8, Ruvbl1, Cspp1, Txnip, Senp5, Fmn2, Gnai3, Pou3f2, Pdgfa, Papd7, Cdc45, Rhoa, Myh9, Anapc10, Hoxb4, Bcl2l1, 2610002M06Rik, Nsun2, Il1a, Cdc123, Cts7, Pkp4, Nudc, Il1b, Cks1b, Gnai2, Mapre2, Syce1, Kit, Anapc13,
GO:0071229	cellular response to acid	0.00487 ( 11 of 2257 genes )	0.00353 ( 120 of 34011 annotated genes )	0.09004	1	Mirlet7f-2, Mir101b, Mir217, Tnf, Mir216b, Mir379, Mir365-1, Mapksp1, Mir669c, Eno1, Bcl2l1,
GO:0006873	cellular ion homeostasis	0.01861 ( 42 of 2257 genes )	0.01714 ( 583 of 34011 annotated genes )	0.09005	1	Immt, Egr2, Scn1b, Bnip3, Ckb, Psen1, Xcl1, Atp6v0c, Csrp3, C5ar1, Atp5b, Kdr, Cnr1, Cd38, Hif1a, Ppt1, Calca, Pou3f2, Rhag, Commd1, Tspo, Apoe, Fkbp1a, Ccr1, Gimap5, Afg3l2, P2ry2, Bcl2l1, Diap1, Scn2a1, Gja1, Trdn, P2rx1, Nucb2, Tgm2, Il1b, Cxcl1, Ndrg1, Cx3cl1, Adm, Edn1, Prkca,
GO:0002706	regulation of lymphocyte	0.00399 ( 9 of 2257 genes )	0.00273 ( 93 of 34011 annotated genes )	0.09121	1	Pvr, Gimap5, Tnf, Fcgr2b, Pnp, Xcl1, Ppp3cb, Fcgr3, Tap1,
GO:0006766	vitamin metabolic process	0.00399 ( 9 of 2257 genes )	0.00273 ( 93 of 34011 annotated genes )	0.09121	1	Retsat, Ttpa, Pnp, Nampt, Kynu, Adh4, Tnf, Aldh1a1, Slc23a2,
GO:0009892	negative regulation of me	0.03943 ( 89 of 2257 genes )	0.03908 ( 1329 of 34011 annotated genes )	0.09123	1	Kdm3a, Dab2, Xpo5, Mir196a-1, Psen1, Sbno2, Asz1, Sap30, Xcl1, Eno1, Rest, Mbd3l1, Niacr1, Cd38, Tsc22d3, Tnf, Tspo, Psmd10, Nfkb1, Bace2, Dab2ip, Foxn3, Apoe, Ccr1, Loxl2, Mir135a-2, Plek, Cbx5, Rbpj, Cd34, Trim30a, Nr1i2, Pebp1, Snx6, Dnaja3, Mir34c, Ppap2b, Hivep1, Prkca, Edn1, Bnip3, Phb2, Ppp2r5a, Ccl4, Txnip, Cry1, Tcerg1, Skor2, Dusp6, Thbs1, Txn1, Cnr1, Klf11, Cnksr3, Hif1a, Mir217, Calca…
GO:0042990	regulation of transcripti	0.00266 ( 6 of 2257 genes )	0.00159 ( 54 of 34011 annotated genes )	0.09221	1	Il1b, Tnf, Tlr2, Tmem173, Psmd10, Litaf,
GO:0050764	regulation of phagocytosi	0.00266 ( 6 of 2257 genes )	0.00159 ( 54 of 34011 annotated genes )	0.09221	1	Clec7a, Fcgr2b, Ccr7, Cd47, Fcgr3, Bcr,
GO:0000338	protein deneddylation	0.00089 ( 2 of 2257 genes )	0.00026 ( 9 of 34011 annotated genes )	0.09262	1	Cops4, Cops3,
GO:0001780	neutrophil homeostasis	0.00089 ( 2 of 2257 genes )	0.00026 ( 9 of 34011 annotated genes )	0.09262	1	Niacr1, Cd44,
GO:0002283	neutrophil activation inv	0.00089 ( 2 of 2257 genes )	0.00026 ( 9 of 34011 annotated genes )	0.09262	1	Myo1f, Bcr,
GO:0002710	negative regulation of T	0.00089 ( 2 of 2257 genes )	0.00026 ( 9 of 34011 annotated genes )	0.09262	1	Xcl1, Ppp3cb,
GO:0003157	endocardium development	0.00089 ( 2 of 2257 genes )	0.00026 ( 9 of 34011 annotated genes )	0.09262	1	Stk3, Rbpj,
GO:0006228	UTP biosynthetic process	0.00089 ( 2 of 2257 genes )	0.00026 ( 9 of 34011 annotated genes )	0.09262	1	Nme4, Nme5,
GO:0006743	ubiquinone metabolic proc	0.00089 ( 2 of 2257 genes )	0.00026 ( 9 of 34011 annotated genes )	0.09262	1	Coq5, Hmgcr,
GO:0006957	complement activation, al	0.00089 ( 2 of 2257 genes )	0.00026 ( 9 of 34011 annotated genes )	0.09262	1	Cfp, C9,
GO:0010388	cullin deneddylation	0.00089 ( 2 of 2257 genes )	0.00026 ( 9 of 34011 annotated genes )	0.09262	1	Cops4, Cops3,
GO:0010870	positive regulation of re	0.00089 ( 2 of 2257 genes )	0.00026 ( 9 of 34011 annotated genes )	0.09262	1	Hif1a, Edn1,
GO:0015911	plasma membrane long-chai	0.00089 ( 2 of 2257 genes )	0.00026 ( 9 of 34011 annotated genes )	0.09262	1	Thbs1, Acsl5,
GO:0016322	neuron remodeling	0.00089 ( 2 of 2257 genes )	0.00026 ( 9 of 34011 annotated genes )	0.09262	1	Scarf1, Rnd1,
GO:0030497	fatty acid elongation	0.00089 ( 2 of 2257 genes )	0.00026 ( 9 of 34011 annotated genes )	0.09262	1	Elovl3, Elovl2,
GO:0031664	regulation of lipopolysac	0.00089 ( 2 of 2257 genes )	0.00026 ( 9 of 34011 annotated genes )	0.09262	1	Prkca, Mif,
GO:0032490	detection of molecule of	0.00089 ( 2 of 2257 genes )	0.00026 ( 9 of 34011 annotated genes )	0.09262	1	Tlr2, Tlr1,
GO:0034340	response to type I interf	0.00089 ( 2 of 2257 genes )	0.00026 ( 9 of 34011 annotated genes )	0.09262	1	Nlrc5, Ifit1,
GO:0042347	negative regulation of NF	0.00089 ( 2 of 2257 genes )	0.00026 ( 9 of 34011 annotated genes )	0.09262	1	Psmd10, Litaf,
GO:0043089	positive regulation of Cd	0.00089 ( 2 of 2257 genes )	0.00026 ( 9 of 34011 annotated genes )	0.09262	1	Ccr7, Ndel1,
GO:0043558	regulation of translation	0.00089 ( 2 of 2257 genes )	0.00026 ( 9 of 34011 annotated genes )	0.09262	1	Eif2s1, Fech,
GO:0045779	negative regulation of bo	0.00089 ( 2 of 2257 genes )	0.00026 ( 9 of 34011 annotated genes )	0.09262	1	Calca, Cd38,
GO:0048241	epinephrine transport	0.00089 ( 2 of 2257 genes )	0.00026 ( 9 of 34011 annotated genes )	0.09262	1	Ly6e, Crh,
GO:0051323	metaphase	0.00089 ( 2 of 2257 genes )	0.00026 ( 9 of 34011 annotated genes )	0.09262	1	Myh9, Fmn2,
GO:0051825	adhesion to other organis	0.00089 ( 2 of 2257 genes )	0.00026 ( 9 of 34011 annotated genes )	0.09262	1	Gbp6, Icam1,
GO:0051856	adhesion to symbiont	0.00089 ( 2 of 2257 genes )	0.00026 ( 9 of 34011 annotated genes )	0.09262	1	Gbp6, Icam1,
GO:0060052	neurofilament cytoskeleto	0.00089 ( 2 of 2257 genes )	0.00026 ( 9 of 34011 annotated genes )	0.09262	1	Vps54, Ndel1,
GO:0060252	positive regulation of gl	0.00089 ( 2 of 2257 genes )	0.00026 ( 9 of 34011 annotated genes )	0.09262	1	Vim, Tspo,
GO:0060307	regulation of ventricular	0.00089 ( 2 of 2257 genes )	0.00026 ( 9 of 34011 annotated genes )	0.09262	1	Scn1b, Gja1,
GO:0060405	regulation of penile erec	0.00089 ( 2 of 2257 genes )	0.00026 ( 9 of 34011 annotated genes )	0.09262	1	Cnr1, P2ry2,
GO:0060693	regulation of branching i	0.00089 ( 2 of 2257 genes )	0.00026 ( 9 of 34011 annotated genes )	0.09262	1	Pdgfa, Tnf,
GO:0071360	cellular response to exog	0.00089 ( 2 of 2257 genes )	0.00026 ( 9 of 34011 annotated genes )	0.09262	1	Ifit1, Tmem173,
GO:0051607	defense response to virus	0.00354 ( 8 of 2257 genes )	0.00235 ( 80 of 34011 annotated genes )	0.09292	1	Cd86, Cxcl9, Bnip3, Ifit1, Lyst, Itgax, Tmem173, Pycard,
GO:0010563	negative regulation of ph	0.00443 ( 10 of 2257 genes )	0.00315 ( 107 of 34011 annotated genes )	0.09317	1	Cnksr3, Ywhab, Fkbp1a, Psen1, Xdh, Pebp1, Spred2, Ppap2b, Dusp6, Prkca,
GO:0045936	negative regulation of ph	0.00443 ( 10 of 2257 genes )	0.00315 ( 107 of 34011 annotated genes )	0.09317	1	Cnksr3, Ywhab, Fkbp1a, Psen1, Xdh, Pebp1, Spred2, Ppap2b, Dusp6, Prkca,
GO:0006641	triglyceride metabolic pr	0.00310 ( 7 of 2257 genes )	0.00197 ( 67 of 34011 annotated genes )	0.09351	1	Insig2, Ptpn11, Acsl5, Lmf1, Slc22a4, Ldlr, Apoe,
GO:0017015	regulation of transformin	0.00310 ( 7 of 2257 genes )	0.00197 ( 67 of 34011 annotated genes )	0.09351	1	Thbs1, Snx6, Chst11, Aspn, Tgfb1i1, Skor2, Smurf1,
GO:0042537	benzene-containing compou	0.00310 ( 7 of 2257 genes )	0.00197 ( 67 of 34011 annotated genes )	0.09351	1	Hdc, Sult1d1, Gch1, Ly6e, Pgcp, Kynu, Moxd1,
GO:0050773	regulation of dendrite de	0.00310 ( 7 of 2257 genes )	0.00197 ( 67 of 34011 annotated genes )	0.09351	1	Ywhah, Prex1, Rhoa, Robo1, Caprin1, Tnik, Lrp8,
GO:0051592	response to calcium ion	0.00310 ( 7 of 2257 genes )	0.00197 ( 67 of 34011 annotated genes )	0.09351	1	Thbs1, Fga, Homer1, Ttn, Adam9, Fgg, Pdcd6,
GO:0019932	second-messenger-mediated	0.00930 ( 21 of 2257 genes )	0.00779 ( 265 of 34011 annotated genes )	0.09364	1	Gpr139, Apoe, Cmklr1, Fzd1, Ccl4, Plek, Thbs1, Kdr, Cnr1, Gnai3, Tgm2, Gsn, Ndufs4, Gnai2, Tnf, Calca, Pebp1, Vip, Exoc4, Edn1, Tox3,
GO:0009395	phospholipid catabolic pr	0.00177 ( 4 of 2257 genes )	0.00088 ( 30 of 34011 annotated genes )	0.09385	1	Smpdl3b, Prdx6, Ldlr, Pld2,
GO:0032651	regulation of interleukin	0.00177 ( 4 of 2257 genes )	0.00088 ( 30 of 34011 annotated genes )	0.09385	1	Ccr7, Casp1, Mefv, Pycard,
GO:0042743	hydrogen peroxide metabol	0.00177 ( 4 of 2257 genes )	0.00088 ( 30 of 34011 annotated genes )	0.09385	1	Cybb, Epx, Prdx6, Cycs,
GO:0045069	regulation of viral genom	0.00177 ( 4 of 2257 genes )	0.00088 ( 30 of 34011 annotated genes )	0.09385	1	Ifit1, Tnf, Nr5a2, Ppia,
GO:0045103	intermediate filament-bas	0.00177 ( 4 of 2257 genes )	0.00088 ( 30 of 34011 annotated genes )	0.09385	1	Vim, Vps54, Ndel1, Mtm1,
GO:0061383	trabecula morphogenesis	0.00177 ( 4 of 2257 genes )	0.00088 ( 30 of 34011 annotated genes )	0.09385	1	Rhoa, Rbpj, Fkbp1a, Egln1,
GO:0070192	chromosome organization i	0.00177 ( 4 of 2257 genes )	0.00088 ( 30 of 34011 annotated genes )	0.09385	1	Syce2, Tex11, Syce1, Gm14160,
GO:0007519	skeletal muscle tissue de	0.00576 ( 13 of 2257 genes )	0.00438 ( 149 of 34011 annotated genes )	0.09406	1	Psma6, Myl6, Flnb, Gphn, Homer1, Col19a1, Tsc22d3, Hmgcr, Pdzrn3, Nphs1, Rhoa, Afg3l2, Dnaja3,
GO:0050670	regulation of lymphocyte	0.00576 ( 13 of 2257 genes )	0.00438 ( 149 of 34011 annotated genes )	0.09406	1	Cd59b, Cd86, Fcgr2b, Pnp, Nck1, Cd38, Pdcd1lg2, Cd209a, Ripk2, Il1b, Ccr7, Dnaja3, Mif,
GO:0007160	cell-matrix adhesion	0.00487 ( 11 of 2257 genes )	0.00356 ( 121 of 34011 annotated genes )	0.09413	1	Kdr, Csf1, Thbs1, Pip5k1a, Nid1, Rhoa, Arhgap6, Fn1, Adam8, Adam9, Plau,
GO:0032102	negative regulation of re	0.00487 ( 11 of 2257 genes )	0.00356 ( 121 of 34011 annotated genes )	0.09413	1	Fcgr2b, Grin3a, Tnfrsf1b, Apoe, Psmb4, Hmgcr, Ier3, Robo1, Fabp7, Bcr, Mefv,
GO:0051604	protein maturation	0.00487 ( 11 of 2257 genes )	0.00356 ( 121 of 34011 annotated genes )	0.09413	1	Sec11a, Cd59b, Thbs1, Lmf1, Casp1, Adamts3, Serpinh1, Psen1, Inpp5b, Afg3l2, Afg3l1,
GO:0002347	response to tumor cell	0.00133 ( 3 of 2257 genes )	0.00056 ( 19 of 34011 annotated genes )	0.09485	1	Pvr, Xcl1, Txnip,
GO:0006837	serotonin transport	0.00133 ( 3 of 2257 genes )	0.00056 ( 19 of 34011 annotated genes )	0.09485	1	P2rx1, Fcgr3, Crh,
GO:0010573	vascular endothelial grow	0.00133 ( 3 of 2257 genes )	0.00056 ( 19 of 34011 annotated genes )	0.09485	1	Il1b, Il1a, Hif1a,
GO:0010574	regulation of vascular en	0.00133 ( 3 of 2257 genes )	0.00056 ( 19 of 34011 annotated genes )	0.09485	1	Il1b, Il1a, Hif1a,
GO:0016577	histone demethylation	0.00133 ( 3 of 2257 genes )	0.00056 ( 19 of 34011 annotated genes )	0.09485	1	Kdm5c, Kdm3a, Jmjd6,
GO:0032757	positive regulation of in	0.00133 ( 3 of 2257 genes )	0.00056 ( 19 of 34011 annotated genes )	0.09485	1	Il1b, Calca, Tlr2,
GO:0033158	regulation of protein imp	0.00133 ( 3 of 2257 genes )	0.00056 ( 19 of 34011 annotated genes )	0.09485	1	Txn1, Hsp90aa1, Tmem173,
GO:0033198	response to ATP	0.00133 ( 3 of 2257 genes )	0.00056 ( 19 of 34011 annotated genes )	0.09485	1	Il1b, P2rx1, Casp1,
GO:0034243	regulation of transcripti	0.00133 ( 3 of 2257 genes )	0.00056 ( 19 of 34011 annotated genes )	0.09485	1	Tceb1, Hif1a, Map2k1,
GO:0045672	positive regulation of os	0.00133 ( 3 of 2257 genes )	0.00056 ( 19 of 34011 annotated genes )	0.09485	1	Ccr1, Csf1, Tnf,
GO:0045747	positive regulation of No	0.00133 ( 3 of 2257 genes )	0.00056 ( 19 of 34011 annotated genes )	0.09485	1	Rbpj, Kit, Stat3,
GO:0050000	chromosome localization	0.00133 ( 3 of 2257 genes )	0.00056 ( 19 of 34011 annotated genes )	0.09485	1	Pinx1, Rrs1, Fmn2,
GO:0050820	positive regulation of co	0.00133 ( 3 of 2257 genes )	0.00056 ( 19 of 34011 annotated genes )	0.09485	1	Nfe2l2, Thbs1, Psen1,
GO:0051303	establishment of chromoso	0.00133 ( 3 of 2257 genes )	0.00056 ( 19 of 34011 annotated genes )	0.09485	1	Pinx1, Rrs1, Fmn2,
GO:0051354	negative regulation of ox	0.00133 ( 3 of 2257 genes )	0.00056 ( 19 of 34011 annotated genes )	0.09485	1	Cnr1, Gzma, Nfkb1,
GO:0090022	regulation of neutrophil	0.00133 ( 3 of 2257 genes )	0.00056 ( 19 of 34011 annotated genes )	0.09485	1	Ccr7, Xcl1, Edn1,
GO:0007034	vacuolar transport	0.00222 ( 5 of 2257 genes )	0.00123 ( 42 of 34011 annotated genes )	0.09491	1	Chmp5, Ap3b1, Mtm1, Stx8, Vps29,
GO:0009110	vitamin biosynthetic proc	0.00222 ( 5 of 2257 genes )	0.00123 ( 42 of 34011 annotated genes )	0.09491	1	Tnf, Aldh1a1, Pnp, Nampt, Kynu,
GO:0032386	regulation of intracellul	0.00665 ( 15 of 2257 genes )	0.00523 ( 178 of 34011 annotated genes )	0.09572	1	Txn1, Ptpn11, Tlr2, Mtap1b, Dab2ip, Trdn, Tmem30a, Litaf, Il1b, Fzd1, Rangap1, Tnf, Hsp90aa1, Tmem173, Psmd10,
GO:0050890	cognition	0.00665 ( 15 of 2257 genes )	0.00523 ( 178 of 34011 annotated genes )	0.09572	1	Cnr1, Magt1, Casp1, Lamb1, Adam2, Hif1a, Hmgcr, Psen1, Ppt1, Il1b, Vip, Vdac3, Kit, Crh, Prkca,
GO:0007259	JAK-STAT cascade	0.00399 ( 9 of 2257 genes )	0.00276 ( 94 of 34011 annotated genes )	0.09595	1	Prl, Pigu, Prlr, Stat3, Stat1, Cenpj, Ager, Kit, Osm,
GO:0002449	lymphocyte mediated immun	0.00620 ( 14 of 2257 genes )	0.00482 ( 164 of 34011 annotated genes )	0.0969	1	Pvr, Fcgr2b, Pnp, Fcgr3, Serpinb9, Tap1, Rnf8, C9, Tnf, Gimap5, Xcl1, Ppp3cb, Lyst, Icam1,
GO:0022604	regulation of cell morpho	0.00709 ( 16 of 2257 genes )	0.00567 ( 193 of 34011 annotated genes )	0.0976	1	Mtap1b, Dab2ip, Sh3d19, Caprin1, Psen1, Ywhah, Vim, Tnik, Lrp8, Tgfb1i1, Mif, Ndel1, Scarf1, Zmym4, Robo1, Pou3f2,
GO:0046942	carboxylic acid transport	0.00709 ( 16 of 2257 genes )	0.00567 ( 193 of 34011 annotated genes )	0.0976	1	Thbs1, Slco1a4, Agxt, Slc7a11, Slc22a4, Slc36a4, Slco1b2, Psen1, Il1b, Tnf, Acsl5, Slc38a11, P2ry2, Slc23a2, Nat3, Mif,
GO:0015758	glucose transport	0.00354 ( 8 of 2257 genes )	0.00238 ( 81 of 34011 annotated genes )	0.09814	1	Hk2, Slc2a1, Il1b, Tnf, Pea15a, Edn1, Mif, Prkca,
GO:0046822	regulation of nucleocytop	0.00532 ( 12 of 2257 genes )	0.00400 ( 136 of 34011 annotated genes )	0.09832	1	Txn1, Ptpn11, Tlr2, Dab2ip, Litaf, Il1b, Fzd1, Rangap1, Tnf, Hsp90aa1, Tmem173, Psmd10,
GO:0007018	microtubule-based movemen	0.00487 ( 11 of 2257 genes )	0.00359 ( 122 of 34011 annotated genes )	0.09832	1	Rhot1, Mtap1b, Tuba8, Ndel1, Ssna1, Kif19a, Hif1a, Dnahc10, Tubb5, Kif3b, Map2k1,
GO:0071418	cellular response to amin	0.00487 ( 11 of 2257 genes )	0.00359 ( 122 of 34011 annotated genes )	0.09832	1	Diap1, Mirlet7f-2, Mir101b, Mir217, Tnf, Mir216b, Mir379, Mir365-1, Mapksp1, Mir669c, Bcl2l1,
GO:0001837	epithelial to mesenchymal	0.00310 ( 7 of 2257 genes )	0.00200 ( 68 of 34011 annotated genes )	0.09931	1	Loxl2, Rbpj, Gja1, Dab2ip, Adam15, Hif1a, Tgfb1i1,
GO:0051056	regulation of small GTPas	0.00975 ( 22 of 2257 genes )	0.00829 ( 282 of 34011 annotated genes )	0.09945	1	Csf1, Pip5k1a, Dab2ip, Tnfaip1, Tbc1d8, Fgd5, Ccr7, Shoc2, Iqsec2, Prex1, Tbc1d2b, Tbc1d5, Srgap2, Ndel1, Ttn, Pkp4, Ccl24, Dock4, Rap1gap2, Bcr, Rgl1, Map2k1,
GO:0040008	regulation of growth	0.01639 ( 37 of 2257 genes )	0.01502 ( 511 of 34011 annotated genes )	0.1004	1	Tlr2, Ndufs3, Dab2, Nppa, Ruvbl1, Ube2e3, Eno1, Cd44, Cyr61, Mtpn, Osm, Hoxb13, Dusp6, Stk3, Ndel1, Cd38, Hif1a, Ppt1, Tnf, Pou3f2, Psmd10, Csf1, Socs6, Ptpn11, Mtap1b, Dab2ip, Apoe, D7Ertd443e, Rhoa, Afg3l2, Pla2g2a, Sav1, Rbpj, Stat3, Cish, Tbx2, Zfp640,
GO:0055065	metal ion homeostasis	0.01063 ( 24 of 2257 genes )	0.00920 ( 313 of 34011 annotated genes )	0.1022	1	Immt, Apoe, Fkbp1a, Psen1, Ccr1, Gimap5, Xcl1, Csrp3, P2ry2, C5ar1, Kdr, Diap1, Trdn, Cd38, Nucb2, Hif1a, Tgm2, Il1b, Calca, Cxcl1, Ager, Adm, Edn1, Prkca,
GO:0043547	positive regulation of GT	0.00443 ( 10 of 2257 genes )	0.00320 ( 109 of 34011 annotated genes )	0.1022	1	Pip5k1a, Srgap2, Dab2ip, Ndel1, Pkp4, Ccl24, Dock4, Ccr7, Arhgap6, Map2k1,
GO:0006875	cellular metal ion homeos	0.01019 ( 23 of 2257 genes )	0.00876 ( 298 of 34011 annotated genes )	0.1023	1	Immt, Apoe, Fkbp1a, Psen1, Ccr1, Gimap5, Xcl1, Csrp3, P2ry2, C5ar1, Kdr, Diap1, Trdn, Cd38, Nucb2, Hif1a, Tgm2, Il1b, Calca, Cxcl1, Adm, Edn1, Prkca,
GO:0060537	muscle tissue development	0.01019 ( 23 of 2257 genes )	0.00876 ( 298 of 34011 annotated genes )	0.1023	1	Homer1, Fkbp1a, Hmgcr, Rhoa, Ly6e, Afg3l2, Csrp3, Sav1, Hspg2, Egln1, Psma6, Gphn, Flnb, Myl6, Rbpj, Gja1, Ttn, Col19a1, Tsc22d3, Pdzrn3, Nphs1, Tbx2, Dnaja3,
GO:0006754	ATP biosynthetic process	0.00222 ( 5 of 2257 genes )	0.00126 ( 43 of 34011 annotated genes )	0.1025	1	Atp5f1, Aldoa, Pkm2, Atp5o, Atp5b,
GO:0032272	negative regulation of pr	0.00222 ( 5 of 2257 genes )	0.00126 ( 43 of 34011 annotated genes )	0.1025	1	Gsn, Tmsb10, Add2, Epb4.9, Vdac2,
GO:0032623	interleukin-2 production	0.00222 ( 5 of 2257 genes )	0.00126 ( 43 of 34011 annotated genes )	0.1025	1	Ripk2, Il1b, Il1a, Pnp, Xcl1,
GO:0045776	negative regulation of bl	0.00222 ( 5 of 2257 genes )	0.00126 ( 43 of 34011 annotated genes )	0.1025	1	Cnr1, Gch1, Calca, Crh, Ier3,
GO:0072527	pyrimidine-containing com	0.00222 ( 5 of 2257 genes )	0.00126 ( 43 of 34011 annotated genes )	0.1025	1	Ctps, Nme4, Dpysl3, Nme5, Dpysl2,
GO:0071417	cellular response to orga	0.00487 ( 11 of 2257 genes )	0.00362 ( 123 of 34011 annotated genes )	0.1026	1	Diap1, Mirlet7f-2, Mir101b, Mir217, Tnf, Mir216b, Mir379, Mir365-1, Mapksp1, Mir669c, Bcl2l1,
GO:0002711	positive regulation of T	0.00177 ( 4 of 2257 genes )	0.00091 ( 31 of 34011 annotated genes )	0.103	1	Pvr, Pnp, Xcl1, Tap1,
GO:0030042	actin filament depolymeri	0.00177 ( 4 of 2257 genes )	0.00091 ( 31 of 34011 annotated genes )	0.103	1	Gsn, Add2, Epb4.9, Plek,
GO:0033205	cell cycle cytokinesis	0.00177 ( 4 of 2257 genes )	0.00091 ( 31 of 34011 annotated genes )	0.103	1	Rhoa, Cspp1, Pkp4, Fmn2,
GO:0046850	regulation of bone remode	0.00177 ( 4 of 2257 genes )	0.00091 ( 31 of 34011 annotated genes )	0.103	1	Calca, Gja1, Cd38, Adam8,
GO:0046854	phosphatidylinositol phos	0.00177 ( 4 of 2257 genes )	0.00091 ( 31 of 34011 annotated genes )	0.103	1	Ip6k1, Inpp5b, Pip5kl1, Pip5k1a,
GO:0048678	response to axon injury	0.00177 ( 4 of 2257 genes )	0.00091 ( 31 of 34011 annotated genes )	0.103	1	Scarf1, Ndel1, Map2k1, Mif,
GO:0050819	negative regulation of co	0.00177 ( 4 of 2257 genes )	0.00091 ( 31 of 34011 annotated genes )	0.103	1	Thbs1, Pdgfa, Cd34, Apoe,
GO:0006366	transcription from RNA po	0.03589 ( 81 of 2257 genes )	0.03558 ( 1210 of 34011 annotated genes )	0.1034	1	Nfe2l2, Med14, Nck1, Psen1, Sap30, Ets2, Cyr61, Osm, Rest, Mbd3l1, Tsc22d3, Polr2i, Ppp2r5d, Tnf, Pou3f2, Ikbkap, Armcx3, Psmd10, Nfkb1, Wdr77, Nr5a2, Prpf6, Dab2ip, Ecsit, 0610031J06Rik, Foxn3, Nlrc5, Stat1, Rhoa, Smad1, Tmem173, Rps6ka4, Tceb1, Il1a, Rbpj, Gtf2a1l, Med26, 2700060E02Rik, Rnf4, Dnaja3, Plagl2, Hivep1, Plagl1, Edn1, Egr2, Tlr2, Nedd8, Txnip, Cry1, Tcerg1, Skor2, Txn1, Npat, Klf11,…
GO:0001892	embryonic placenta develo	0.00354 ( 8 of 2257 genes )	0.00241 ( 82 of 34011 annotated genes )	0.1035	1	Ttpa, Stk3, Rbpj, Hif1a, Adm, Cyr61, Egln1, Map2k1,
GO:0008645	hexose transport	0.00354 ( 8 of 2257 genes )	0.00241 ( 82 of 34011 annotated genes )	0.1035	1	Hk2, Slc2a1, Il1b, Tnf, Pea15a, Edn1, Mif, Prkca,
GO:0030282	bone mineralization	0.00354 ( 8 of 2257 genes )	0.00241 ( 82 of 34011 annotated genes )	0.1035	1	Gja1, Hif1a, Bglap, Ccr1, Phex, Bglap-rs1, Acvr2a, Aspn,
GO:0007611	learning or memory	0.00620 ( 14 of 2257 genes )	0.00488 ( 166 of 34011 annotated genes )	0.1042	1	Cnr1, Casp1, Lamb1, Adam2, Hif1a, Hmgcr, Psen1, Ppt1, Il1b, Vip, Vdac3, Kit, Crh, Prkca,
GO:0015849	organic acid transport	0.00709 ( 16 of 2257 genes )	0.00573 ( 195 of 34011 annotated genes )	0.1044	1	Thbs1, Slco1a4, Agxt, Slc7a11, Slc22a4, Slc36a4, Slco1b2, Psen1, Il1b, Tnf, Acsl5, Slc38a11, P2ry2, Slc23a2, Nat3, Mif,
GO:0042991	transcription factor impo	0.00266 ( 6 of 2257 genes )	0.00165 ( 56 of 34011 annotated genes )	0.1054	1	Il1b, Tnf, Tlr2, Tmem173, Psmd10, Litaf,
GO:0030198	extracellular matrix orga	0.00576 ( 13 of 2257 genes )	0.00447 ( 152 of 34011 annotated genes )	0.1056	1	Tgfbi, Col19a1, Csgalnact1, Serpinh1, Fkbp1a, Tnf, Lamc1, Nid1, Loxl2, Fn1, Plod3, Cyr61, Hspg2,
GO:0030218	erythrocyte differentiati	0.00399 ( 9 of 2257 genes )	0.00282 ( 96 of 34011 annotated genes )	0.1059	1	Smad5, Trim10, Hif1a, Jmjd6, Fech, Bpgm, Sfxn1, Acvr2a, Kit,
GO:0030522	intracellular receptor me	0.00532 ( 12 of 2257 genes )	0.00406 ( 138 of 34011 annotated genes )	0.1065	1	Kdm3a, Nr5a2, Med14, 0610031J06Rik, Nr1d2, Phb2, Nr1i2, Stat3, Ywhah, Ipo13, Rhoa, Mll2,
GO:0001919	regulation of receptor re	0.00133 ( 3 of 2257 genes )	0.00059 ( 20 of 34011 annotated genes )	0.107	1	Gria2, Chmp5, Psen1,
GO:0001960	negative regulation of cy	0.00133 ( 3 of 2257 genes )	0.00059 ( 20 of 34011 annotated genes )	0.107	1	Nlrc5, Robo1, Dnaja3,
GO:0002714	positive regulation of B	0.00133 ( 3 of 2257 genes )	0.00059 ( 20 of 34011 annotated genes )	0.107	1	Gimap5, Tnf, Fcgr3,
GO:0002891	positive regulation of im	0.00133 ( 3 of 2257 genes )	0.00059 ( 20 of 34011 annotated genes )	0.107	1	Gimap5, Tnf, Fcgr3,
GO:0010508	positive regulation of au	0.00133 ( 3 of 2257 genes )	0.00059 ( 20 of 34011 annotated genes )	0.107	1	Scoc, Larp1, Pafah1b2,
GO:0030823	regulation of cGMP metabo	0.00133 ( 3 of 2257 genes )	0.00059 ( 20 of 34011 annotated genes )	0.107	1	Lhb, Aipl1, Apoe,
GO:0033059	cellular pigmentation	0.00133 ( 3 of 2257 genes )	0.00059 ( 20 of 34011 annotated genes )	0.107	1	Lyst, Ap3b1, Map2k1,
GO:0045123	cellular extravasation	0.00133 ( 3 of 2257 genes )	0.00059 ( 20 of 34011 annotated genes )	0.107	1	Tnf, Icam1, Adam8,
GO:0046825	regulation of protein exp	0.00133 ( 3 of 2257 genes )	0.00059 ( 20 of 34011 annotated genes )	0.107	1	Txn1, Rangap1, Ptpn11,
GO:0050691	regulation of defense res	0.00133 ( 3 of 2257 genes )	0.00059 ( 20 of 34011 annotated genes )	0.107	1	Ifit1, Tmem173, Pycard,
GO:0051180	vitamin transport	0.00133 ( 3 of 2257 genes )	0.00059 ( 20 of 34011 annotated genes )	0.107	1	Slc2a1, Slc23a2, Afm,
GO:0051491	positive regulation of fi	0.00133 ( 3 of 2257 genes )	0.00059 ( 20 of 34011 annotated genes )	0.107	1	Ccr7, Dpysl3, Myo3a,
GO:0061384	heart trabecular morphoge	0.00133 ( 3 of 2257 genes )	0.00059 ( 20 of 34011 annotated genes )	0.107	1	Rbpj, Fkbp1a, Egln1,
GO:0070527	platelet aggregation	0.00133 ( 3 of 2257 genes )	0.00059 ( 20 of 34011 annotated genes )	0.107	1	Plek, Slc7a11, Prkca,
GO:0044106	cellular amine metabolic	0.01285 ( 29 of 2257 genes )	0.01150 ( 391 of 34011 annotated genes )	0.1075	1	Ctps, Hibadh, Sult1d1, Gch1, Aadat, Bbox1, Aldh18a1, Ly6e, Lao1, BC026590, Moxd1, Mthfd1, Hdc, Bckdk, Agxt, Tdo2, Cd34, Slc22a4, Pgcp, Ldlr, Lgsn, Kynu, Rars, Pebp1, Odc1, Ggh, Hars, Crat, Gmps,
GO:0070661	leukocyte proliferation	0.00709 ( 16 of 2257 genes )	0.00576 ( 196 of 34011 annotated genes )	0.1078	1	Cd59b, Cd86, Csf1, Fcgr2b, Psmb10, Pnp, Nck1, Cd38, Pdcd1lg2, Cd209a, Fkbp1a, Ripk2, Il1b, Ccr7, Dnaja3, Mif,
GO:0048666	neuron development	0.01994 ( 45 of 2257 genes )	0.01882 ( 640 of 34011 annotated genes )	0.1087	1	Egr2, Scn1b, Klf7, Psen1, Ywhah, Vim, Mir133b, Lamc1, Cd44, Tnik, Prex1, Kdr, Cnr1, Srgap2, Ndel1, Lamb1, Lgals1, Ppp2r5d, Rnd1, Pou3f2, Slc4a7, Ptpn11, Atxn10, Mtap1b, Grin3a, Caprin1, Fzd1, Rhoa, Afg3l2, P2ry2, Lrp8, Cyfip1, Pld2, Mif, Diap1, Gja1, Il1b, Scarf1, Robo1, Ager, Dpysl3, Ntng1, Adm, Map2k1, Prkca,
GO:0015749	monosaccharide transport	0.00354 ( 8 of 2257 genes )	0.00244 ( 83 of 34011 annotated genes )	0.1091	1	Hk2, Slc2a1, Il1b, Tnf, Pea15a, Edn1, Mif, Prkca,
GO:0051348	negative regulation of tr	0.00576 ( 13 of 2257 genes )	0.00450 ( 153 of 34011 annotated genes )	0.1096	1	Dusp19, Dab2ip, Apoe, Hmgcr, Psen1, Ppp2r5a, Prpsap1, Il1b, Dnaja3, Spred2, Prkca, Dusp6, Dnajc3,
GO:0007283	spermatogenesis	0.01063 ( 24 of 2257 genes )	0.00929 ( 316 of 34011 annotated genes )	0.1103	1	Ddx4, Kdm3a, Nme5, Spata19, Rnf8, Tlk2, Asz1, Catsperb, Acvr2a, Meig1, Bcl2l1, Pafah1b2, Mif, Tbata, Mtl5, Inpp5b, Mea1, Calca, Pebp1, Adam24, Kit, Gm14160, Slc9a10, Adam25,
GO:0048232	male gamete generation	0.01063 ( 24 of 2257 genes )	0.00929 ( 316 of 34011 annotated genes )	0.1103	1	Ddx4, Kdm3a, Nme5, Spata19, Rnf8, Tlk2, Asz1, Catsperb, Acvr2a, Meig1, Bcl2l1, Pafah1b2, Mif, Tbata, Mtl5, Inpp5b, Mea1, Calca, Pebp1, Adam24, Kit, Gm14160, Slc9a10, Adam25,
GO:0007618	mating	0.00222 ( 5 of 2257 genes )	0.00129 ( 44 of 34011 annotated genes )	0.1105	1	Cnr1, Acvr2a, P2rx1, Ncoa1, P2ry2,
GO:0045446	endothelial cell differen	0.00222 ( 5 of 2257 genes )	0.00129 ( 44 of 34011 annotated genes )	0.1105	1	Kdr, Xdh, Rbpj, Plod3, Abcb1b,
GO:2000106	regulation of leukocyte a	0.00222 ( 5 of 2257 genes )	0.00129 ( 44 of 34011 annotated genes )	0.1105	1	Ccr7, Cd44, Adam8, Serpinb9, Mif,
GO:0001934	positive regulation of pr	0.00886 ( 20 of 2257 genes )	0.00753 ( 256 of 34011 annotated genes )	0.1107	1	Pdgfa, Dab2, Psen1, Fzd1, Cd44, Acvr2a, Cyr61, Lrp8, Osm, Crh, Mif, Rps6ka4, Chi3l1, Il1b, Csnk2b, Tnf, Rap2c, Kit, Ppap2b, Prkca,
GO:0016054	organic acid catabolic pr	0.00532 ( 12 of 2257 genes )	0.00409 ( 139 of 34011 annotated genes )	0.1108	1	Mthfd1, Hdc, Cnr1, Bckdk, Aadat, Agxt, Tdo2, Kynu, Acsl5, Acot2, BC026590, Lao1,
GO:0046395	carboxylic acid catabolic	0.00532 ( 12 of 2257 genes )	0.00409 ( 139 of 34011 annotated genes )	0.1108	1	Mthfd1, Hdc, Cnr1, Bckdk, Aadat, Agxt, Tdo2, Kynu, Acsl5, Acot2, BC026590, Lao1,
GO:0002701	negative regulation of pr	0.00089 ( 2 of 2257 genes )	0.00029 ( 10 of 34011 annotated genes )	0.1115	1	Fcgr2b, Xcl1,
GO:0002903	negative regulation of B	0.00089 ( 2 of 2257 genes )	0.00029 ( 10 of 34011 annotated genes )	0.1115	1	Cd44, Mif,
GO:0010818	T cell chemotaxis	0.00089 ( 2 of 2257 genes )	0.00029 ( 10 of 34011 annotated genes )	0.1115	1	Ccr7, Xcl1,
GO:0010867	positive regulation of tr	0.00089 ( 2 of 2257 genes )	0.00029 ( 10 of 34011 annotated genes )	0.1115	1	Acsl5, Ldlr,
GO:0016048	detection of temperature	0.00089 ( 2 of 2257 genes )	0.00029 ( 10 of 34011 annotated genes )	0.1115	1	Calca, Accn3,
GO:0030206	chondroitin sulfate biosy	0.00089 ( 2 of 2257 genes )	0.00029 ( 10 of 34011 annotated genes )	0.1115	1	Chst11, Csgalnact1,
GO:0031958	corticosteroid receptor s	0.00089 ( 2 of 2257 genes )	0.00029 ( 10 of 34011 annotated genes )	0.1115	1	Ywhah, Ipo13,
GO:0032276	regulation of gonadotropi	0.00089 ( 2 of 2257 genes )	0.00029 ( 10 of 34011 annotated genes )	0.1115	1	Acvr2a, Crh,
GO:0032801	receptor catabolic proces	0.00089 ( 2 of 2257 genes )	0.00029 ( 10 of 34011 annotated genes )	0.1115	1	Apoe, Smurf1,
GO:0033363	secretory granule organiz	0.00089 ( 2 of 2257 genes )	0.00029 ( 10 of 34011 annotated genes )	0.1115	1	Abca1, Lyst,
GO:0033604	negative regulation of ca	0.00089 ( 2 of 2257 genes )	0.00029 ( 10 of 34011 annotated genes )	0.1115	1	Cnr1, Crh,
GO:0042541	hemoglobin biosynthetic p	0.00089 ( 2 of 2257 genes )	0.00029 ( 10 of 34011 annotated genes )	0.1115	1	Fech, Hif1a,
GO:0042737	drug catabolic process	0.00089 ( 2 of 2257 genes )	0.00029 ( 10 of 34011 annotated genes )	0.1115	1	Cyp2c65, Nr1i2,
GO:0043268	positive regulation of po	0.00089 ( 2 of 2257 genes )	0.00029 ( 10 of 34011 annotated genes )	0.1115	1	Cxcl1, Mif,
GO:0045625	regulation of T-helper 1	0.00089 ( 2 of 2257 genes )	0.00029 ( 10 of 34011 annotated genes )	0.1115	1	Ripk2, Ccr7,
GO:0046051	UTP metabolic process	0.00089 ( 2 of 2257 genes )	0.00029 ( 10 of 34011 annotated genes )	0.1115	1	Nme4, Nme5,
GO:0051000	positive regulation of ni	0.00089 ( 2 of 2257 genes )	0.00029 ( 10 of 34011 annotated genes )	0.1115	1	Gch1, Apoe,
GO:0071780	mitotic cell cycle G2/M t	0.00089 ( 2 of 2257 genes )	0.00029 ( 10 of 34011 annotated genes )	0.1115	1	Bcl2l1, D7Ertd443e,
GO:0000041	transition metal ion tran	0.00310 ( 7 of 2257 genes )	0.00206 ( 70 of 34011 annotated genes )	0.1115	1	Sfxn1, Slc31a2, Ap3b1, Slc39a10, Slc31a1, Slc30a6, Trpm2,
GO:0050728	negative regulation of in	0.00310 ( 7 of 2257 genes )	0.00206 ( 70 of 34011 annotated genes )	0.1115	1	Fcgr2b, Tnfrsf1b, Mefv, Bcr, Apoe, Psmb4, Ier3,
GO:0090276	regulation of peptide hor	0.00443 ( 10 of 2257 genes )	0.00326 ( 111 of 34011 annotated genes )	0.1117	1	Cnr1, Ptpn11, Cd38, Hmgcr, Il1b, Tnf, Ppp3cb, Rfx6, Crh, Rest,
GO:0006986	response to unfolded prot	0.00266 ( 6 of 2257 genes )	0.00168 ( 57 of 34011 annotated genes )	0.1124	1	Nfe2l2, Ptpn1, Ero1l, Hsp90aa1, Tmbim6, Dnajc3,
GO:0018958	phenol-containing compoun	0.00266 ( 6 of 2257 genes )	0.00168 ( 57 of 34011 annotated genes )	0.1124	1	Hdc, Sult1d1, Gch1, Ly6e, Pgcp, Moxd1,
GO:0030500	regulation of bone minera	0.00266 ( 6 of 2257 genes )	0.00168 ( 57 of 34011 annotated genes )	0.1124	1	Ccr1, Bglap, Gja1, Acvr2a, Bglap-rs1, Hif1a,
GO:0000184	nuclear-transcribed mRNA	0.00177 ( 4 of 2257 genes )	0.00094 ( 32 of 34011 annotated genes )	0.1126	1	Smg7, Dcps, Ncbp2, Gspt1,
GO:0007528	neuromuscular junction de	0.00177 ( 4 of 2257 genes )	0.00094 ( 32 of 34011 annotated genes )	0.1126	1	Pdzrn3, Gphn, Afg3l2, Dnaja3,
GO:0009109	coenzyme catabolic proces	0.00177 ( 4 of 2257 genes )	0.00094 ( 32 of 34011 annotated genes )	0.1126	1	Mdh2, Suclg1, Aldh1l2, Cs,
GO:0032677	regulation of interleukin	0.00177 ( 4 of 2257 genes )	0.00094 ( 32 of 34011 annotated genes )	0.1126	1	Il1b, Tnf, Calca, Tlr2,
GO:0051865	protein autoubiquitinatio	0.00177 ( 4 of 2257 genes )	0.00094 ( 32 of 34011 annotated genes )	0.1126	1	Rnf4, Rnf213, Rnf115, Trim30a,
GO:0051930	regulation of sensory per	0.00177 ( 4 of 2257 genes )	0.00094 ( 32 of 34011 annotated genes )	0.1126	1	Prol1, Il1a, Vip, Edn1,
GO:0051931	regulation of sensory per	0.00177 ( 4 of 2257 genes )	0.00094 ( 32 of 34011 annotated genes )	0.1126	1	Prol1, Il1a, Vip, Edn1,
GO:0007517	muscle organ development	0.00975 ( 22 of 2257 genes )	0.00844 ( 287 of 34011 annotated genes )	0.1138	1	Homer1, Fkbp1a, Hmgcr, Rhoa, Ly6e, Afg3l2, Csrp3, Sav1, Egln1, Psma6, Gphn, Flnb, Myl6, Rbpj, Gja1, Ttn, Col19a1, Tsc22d3, Pdzrn3, Nphs1, Tbx2, Dnaja3,
GO:0045664	regulation of neuron diff	0.01196 ( 27 of 2257 genes )	0.01067 ( 363 of 34011 annotated genes )	0.114	1	Scn1b, Mtap1b, Sox21, Caprin1, Psen1, Ywhah, Vim, Mir133b, Rhoa, P2ry2, Tnik, Lrp8, Rest, Mif, Prex1, Cnr1, Ndel1, Rgs6, Lgals1, Il1b, Ppp2r5d, Scarf1, Pou3f2, Robo1, Dpysl3, Ncoa1, Dpysl2,
GO:0009914	hormone transport	0.00709 ( 16 of 2257 genes )	0.00582 ( 198 of 34011 annotated genes )	0.115	1	Ptpn11, Hmgcr, Ly6e, Acvr2a, Osm, Rfx6, Crh, Rest, Cnr1, Niacr1, Cd38, Il1b, Tnf, Ppp3cb, Adm, Edn1,
GO:0048545	response to steroid hormo	0.00709 ( 16 of 2257 genes )	0.00582 ( 198 of 34011 annotated genes )	0.115	1	Mir148a, Agl, Nr5a2, Agxt, Nr1d2, Nr1i2, Stat3, Sva, Tnf, Mir297-1, Mll2, Ncoa1, Adam9, Rest, Prkca, Map2k1,
GO:0035023	regulation of Rho protein	0.00532 ( 12 of 2257 genes )	0.00412 ( 140 of 34011 annotated genes )	0.1151	1	Prex1, Pip5k1a, Srgap2, Tnfaip1, Ttn, Ndel1, Pkp4, Fgd5, Ccl24, Dock4, Ccr7, Bcr,
GO:0001890	placenta development	0.00443 ( 10 of 2257 genes )	0.00329 ( 112 of 34011 annotated genes )	0.1167	1	Birc2, Ttpa, Stk3, Rbpj, Vwf, Hif1a, Adm, Cyr61, Egln1, Map2k1,
GO:0046578	regulation of Ras protein	0.00886 ( 20 of 2257 genes )	0.00759 ( 258 of 34011 annotated genes )	0.1171	1	Csf1, Pip5k1a, Dab2ip, Tnfaip1, Tbc1d8, Fgd5, Ccr7, Shoc2, Iqsec2, Tbc1d2b, Prex1, Tbc1d5, Srgap2, Ndel1, Ttn, Pkp4, Ccl24, Dock4, Bcr, Map2k1,
GO:0010518	positive regulation of ph	0.00310 ( 7 of 2257 genes )	0.00209 ( 71 of 34011 annotated genes )	0.1178	1	Calca, Gpr139, Arhgap6, Plek, Cyr61, Tgm2, Edn1,
GO:0001947	heart looping	0.00222 ( 5 of 2257 genes )	0.00132 ( 45 of 34011 annotated genes )	0.1187	1	Tbx2, Rbpj, Gja1, Hif1a, Psen1,
GO:0034976	response to endoplasmic r	0.00222 ( 5 of 2257 genes )	0.00132 ( 45 of 34011 annotated genes )	0.1187	1	Nfe2l2, Ppp1r15b, Ptpn1, Ero1l, Dnajc3,
GO:0045453	bone resorption	0.00222 ( 5 of 2257 genes )	0.00132 ( 45 of 34011 annotated genes )	0.1187	1	Xdh, Calca, Ctsk, Cd38, Adam8,
GO:0046323	glucose import	0.00222 ( 5 of 2257 genes )	0.00132 ( 45 of 34011 annotated genes )	0.1187	1	Hk2, Tnf, Pea15a, Prkca, Mif,
GO:0048814	regulation of dendrite mo	0.00222 ( 5 of 2257 genes )	0.00132 ( 45 of 34011 annotated genes )	0.1187	1	Ywhah, Robo1, Caprin1, Tnik, Lrp8,
GO:0071356	cellular response to tumo	0.00222 ( 5 of 2257 genes )	0.00132 ( 45 of 34011 annotated genes )	0.1187	1	Tnf, Stat1, Dab2ip, Tnfrsf1b, Pycard,
GO:0001776	leukocyte homeostasis	0.00266 ( 6 of 2257 genes )	0.00171 ( 58 of 34011 annotated genes )	0.1195	1	Gimap5, Ppp3cb, Cd44, Dnaja3, Hif1a, Mif,
GO:0007202	activation of phospholipa	0.00266 ( 6 of 2257 genes )	0.00171 ( 58 of 34011 annotated genes )	0.1195	1	Calca, Gpr139, Arhgap6, Plek, Tgm2, Edn1,
GO:0007589	body fluid secretion	0.00266 ( 6 of 2257 genes )	0.00171 ( 58 of 34011 annotated genes )	0.1195	1	Xdh, Csn3, Prlr, P2ry2, Hif1a, Edn1,
GO:0046634	regulation of alpha-beta	0.00266 ( 6 of 2257 genes )	0.00171 ( 58 of 34011 annotated genes )	0.1195	1	Ripk2, Gimap5, Pnp, Ccr7, Ap3b1, Il2rg,
GO:0051897	positive regulation of pr	0.00266 ( 6 of 2257 genes )	0.00171 ( 58 of 34011 annotated genes )	0.1195	1	Thbs1, Pdgfa, Tnf, Stk3, Adam8, Chi3l1,
GO:0051928	positive regulation of ca	0.00266 ( 6 of 2257 genes )	0.00171 ( 58 of 34011 annotated genes )	0.1195	1	Ccr1, Ccl4, Gimap5, Xcl1, Tspo, Crh,
GO:0007254	JNK cascade	0.00532 ( 12 of 2257 genes )	0.00415 ( 141 of 34011 annotated genes )	0.1196	1	Il1a, Stk3, Dusp19, Dab2ip, Ltbr, Ripk2, Il1b, Nphs1, Tnf, Ccr7, Tnik, Edn1,
GO:0001976	neurological system proce	0.00133 ( 3 of 2257 genes )	0.00062 ( 21 of 34011 annotated genes )	0.1197	1	Calca, Ace2, Mif,
GO:0006221	pyrimidine nucleotide bio	0.00133 ( 3 of 2257 genes )	0.00062 ( 21 of 34011 annotated genes )	0.1197	1	Ctps, Nme4, Nme5,
GO:0008211	glucocorticoid metabolic	0.00133 ( 3 of 2257 genes )	0.00062 ( 21 of 34011 annotated genes )	0.1197	1	Ywhah, Crh, Rest,
GO:0030225	macrophage differentiatio	0.00133 ( 3 of 2257 genes )	0.00062 ( 21 of 34011 annotated genes )	0.1197	1	Csf1, Calca, Prkca,
GO:0031103	axon regeneration	0.00133 ( 3 of 2257 genes )	0.00062 ( 21 of 34011 annotated genes )	0.1197	1	Scarf1, Ndel1, Mif,
GO:0043277	apoptotic cell clearance	0.00133 ( 3 of 2257 genes )	0.00062 ( 21 of 34011 annotated genes )	0.1197	1	Thbs1, Jmjd6, Tgm2,
GO:0043536	positive regulation of bl	0.00133 ( 3 of 2257 genes )	0.00062 ( 21 of 34011 annotated genes )	0.1197	1	Thbs1, Amotl1, Prkca,
GO:0048535	lymph node development	0.00133 ( 3 of 2257 genes )	0.00062 ( 21 of 34011 annotated genes )	0.1197	1	Ccr7, Ltbr, Nfkb1,
GO:0070229	negative regulation of ly	0.00133 ( 3 of 2257 genes )	0.00062 ( 21 of 34011 annotated genes )	0.1197	1	Cd44, Serpinb9, Mif,
GO:0071359	cellular response to dsRN	0.00133 ( 3 of 2257 genes )	0.00062 ( 21 of 34011 annotated genes )	0.1197	1	Ifit1, Lin28b, Tmem173,
GO:0072528	pyrimidine-containing com	0.00133 ( 3 of 2257 genes )	0.00062 ( 21 of 34011 annotated genes )	0.1197	1	Ctps, Nme4, Nme5,
GO:0072676	lymphocyte migration	0.00133 ( 3 of 2257 genes )	0.00062 ( 21 of 34011 annotated genes )	0.1197	1	Ccr7, Xcl1, Adam8,
GO:0090200	positive regulation of re	0.00133 ( 3 of 2257 genes )	0.00062 ( 21 of 34011 annotated genes )	0.1197	1	Bnip3, Tnfsf10, Fam162a,
GO:0001942	hair follicle development	0.00354 ( 8 of 2257 genes )	0.00250 ( 85 of 34011 annotated genes )	0.1207	1	Ldb2, Pdgfa, Tnf, Dsg4, Rbpj, Sox21, Sav1, Psen1,
GO:0071901	negative regulation of pr	0.00354 ( 8 of 2257 genes )	0.00250 ( 85 of 34011 annotated genes )	0.1207	1	Dusp19, Dab2ip, Apoe, Hmgcr, Il1b, Spred2, Dusp6, Prkca,
GO:0016032	viral reproduction	0.00487 ( 11 of 2257 genes )	0.00373 ( 127 of 34011 annotated genes )	0.1209	1	Nr5a2, Tap1, Ifit1, Tnf, Ccl4, Ace2, Oas1a, Icam1, Bcl2l1, Rest, Ppia,
GO:0030509	BMP signaling pathway	0.00443 ( 10 of 2257 genes )	0.00332 ( 113 of 34011 annotated genes )	0.1217	1	Smad5, Mirlet7f-2, Dsg4, Rbpj, Ecsit, Smurf1, Fzd1, Smad1, Acvr2a, Cyr61,
GO:0060538	skeletal muscle organ dev	0.00576 ( 13 of 2257 genes )	0.00459 ( 156 of 34011 annotated genes )	0.1221	1	Psma6, Myl6, Flnb, Gphn, Homer1, Col19a1, Tsc22d3, Hmgcr, Pdzrn3, Nphs1, Rhoa, Afg3l2, Dnaja3,
GO:0019079	viral genome replication	0.00177 ( 4 of 2257 genes )	0.00097 ( 33 of 34011 annotated genes )	0.1226	1	Ifit1, Tnf, Nr5a2, Ppia,
GO:0030837	negative regulation of ac	0.00177 ( 4 of 2257 genes )	0.00097 ( 33 of 34011 annotated genes )	0.1226	1	Gsn, Tmsb10, Add2, Epb4.9,
GO:0048524	positive regulation of vi	0.00177 ( 4 of 2257 genes )	0.00097 ( 33 of 34011 annotated genes )	0.1226	1	Ifit1, Ccl4, Nr5a2, Rest,
GO:0071445	cellular response to prot	0.00177 ( 4 of 2257 genes )	0.00097 ( 33 of 34011 annotated genes )	0.1226	1	Nfe2l2, Ptpn1, Ero1l, Dnajc3,
GO:0006022	aminoglycan metabolic pro	0.00310 ( 7 of 2257 genes )	0.00212 ( 72 of 34011 annotated genes )	0.1244	1	Il1b, Gns, Cd44, Chst11, Itih3, Csgalnact1, Chi3l1,
GO:0009267	cellular response to star	0.00310 ( 7 of 2257 genes )	0.00212 ( 72 of 34011 annotated genes )	0.1244	1	Scoc, Atg13, Higd1a, Slc2a1, Larp1, Pafah1b2, Psen1,
GO:0090101	negative regulation of tr	0.00310 ( 7 of 2257 genes )	0.00212 ( 72 of 34011 annotated genes )	0.1244	1	Fzd1, Snx6, Chst11, Aspn, Tgfb1i1, Skor2, Smurf1,
GO:0002573	myeloid leukocyte differe	0.00487 ( 11 of 2257 genes )	0.00376 ( 128 of 34011 annotated genes )	0.1258	1	Csf1, 5730469M10Rik, Cd300lf, Psen1, Ccr1, Tnf, Gimap5, Calca, Adam8, Kit, Prkca,
GO:0010562	positive regulation of ph	0.00975 ( 22 of 2257 genes )	0.00856 ( 291 of 34011 annotated genes )	0.1261	1	Pdgfa, Dab2, Psen1, Ppp2r5a, Fzd1, Cd44, Acvr2a, Cyr61, Lrp8, Osm, Crh, Mif, Rps6ka4, Thbs1, Chi3l1, Il1b, Csnk2b, Tnf, Rap2c, Kit, Ppap2b, Prkca,
GO:0045937	positive regulation of ph	0.00975 ( 22 of 2257 genes )	0.00856 ( 291 of 34011 annotated genes )	0.1261	1	Pdgfa, Dab2, Psen1, Ppp2r5a, Fzd1, Cd44, Acvr2a, Cyr61, Lrp8, Osm, Crh, Mif, Rps6ka4, Thbs1, Chi3l1, Il1b, Csnk2b, Tnf, Rap2c, Kit, Ppap2b, Prkca,
GO:0002429	immune response-activatin	0.00354 ( 8 of 2257 genes )	0.00253 ( 86 of 34011 annotated genes )	0.1267	1	Clec7a, Tlr2, Cd38, Psen1, Ripk2, Ccr7, Ube2n, C5ar1,
GO:0022404	molting cycle process	0.00354 ( 8 of 2257 genes )	0.00253 ( 86 of 34011 annotated genes )	0.1267	1	Ldb2, Pdgfa, Tnf, Dsg4, Rbpj, Sox21, Sav1, Psen1,
GO:0022405	hair cycle process	0.00354 ( 8 of 2257 genes )	0.00253 ( 86 of 34011 annotated genes )	0.1267	1	Ldb2, Pdgfa, Tnf, Dsg4, Rbpj, Sox21, Sav1, Psen1,
GO:0051262	protein tetramerization	0.00354 ( 8 of 2257 genes )	0.00253 ( 86 of 34011 annotated genes )	0.1267	1	Pcbd2, Nudt21, Hmgcr, Gria2, Aldh1a1, Rrm1, Aldh1a7, Aldoc,
GO:0046519	sphingoid metabolic proce	0.00266 ( 6 of 2257 genes )	0.00173 ( 59 of 34011 annotated genes )	0.1269	1	Sgms2, Ppap2a, Agk, P2rx1, Lass6, Cyr61,
GO:0002791	regulation of peptide sec	0.00443 ( 10 of 2257 genes )	0.00335 ( 114 of 34011 annotated genes )	0.1269	1	Cnr1, Ptpn11, Cd38, Hmgcr, Il1b, Tnf, Ppp3cb, Rfx6, Crh, Rest,
GO:0042306	regulation of protein imp	0.00443 ( 10 of 2257 genes )	0.00335 ( 114 of 34011 annotated genes )	0.1269	1	Txn1, Tlr2, Dab2ip, Litaf, Il1b, Fzd1, Tnf, Hsp90aa1, Tmem173, Psmd10,
GO:0044403	symbiosis, encompassing m	0.00443 ( 10 of 2257 genes )	0.00335 ( 114 of 34011 annotated genes )	0.1269	1	Tlr2, Tap1, Ifit1, Tnf, Ccl4, Ace2, Gbp6, Icam1, Bcl2l1, Rest,
GO:0044419	interspecies interaction	0.00443 ( 10 of 2257 genes )	0.00335 ( 114 of 34011 annotated genes )	0.1269	1	Tlr2, Tap1, Ifit1, Tnf, Ccl4, Ace2, Gbp6, Icam1, Bcl2l1, Rest,
GO:0071230	cellular response to amin	0.00443 ( 10 of 2257 genes )	0.00335 ( 114 of 34011 annotated genes )	0.1269	1	Mirlet7f-2, Mir101b, Mir217, Tnf, Mir216b, Mir379, Mir365-1, Mapksp1, Mir669c, Bcl2l1,
GO:0090087	regulation of peptide tra	0.00443 ( 10 of 2257 genes )	0.00335 ( 114 of 34011 annotated genes )	0.1269	1	Cnr1, Ptpn11, Cd38, Hmgcr, Il1b, Tnf, Ppp3cb, Rfx6, Crh, Rest,
GO:0010522	regulation of calcium ion	0.00222 ( 5 of 2257 genes )	0.00135 ( 46 of 34011 annotated genes )	0.1272	1	Gimap5, Calca, Diap1, Xcl1, Trdn,
GO:0007568	aging	0.00399 ( 9 of 2257 genes )	0.00294 ( 100 of 34011 annotated genes )	0.1273	1	Il1b, Cnr1, Tbx2, Mapkapk5, Dnaja3, Aldoc, Apoe, Map2k1, Mif,
GO:0042326	negative regulation of ph	0.00399 ( 9 of 2257 genes )	0.00294 ( 100 of 34011 annotated genes )	0.1273	1	Cnksr3, Fkbp1a, Psen1, Xdh, Pebp1, Spred2, Ppap2b, Dusp6, Prkca,
GO:0050796	regulation of insulin sec	0.00399 ( 9 of 2257 genes )	0.00294 ( 100 of 34011 annotated genes )	0.1273	1	Cnr1, Ptpn11, Cd38, Hmgcr, Il1b, Tnf, Ppp3cb, Rfx6, Rest,
GO:0006936	muscle contraction	0.00620 ( 14 of 2257 genes )	0.00506 ( 172 of 34011 annotated genes )	0.1282	1	Smad5, Myl6, Mybpc2, Scn1b, Gja1, Homer1, P2rx1, Ttn, Aldoa, Fkbp1a, Calca, Prkca, Edn1, Map2k1,
GO:0050769	positive regulation of ne	0.00532 ( 12 of 2257 genes )	0.00420 ( 143 of 34011 annotated genes )	0.1288	1	Kdr, Mtap1b, Caprin1, Ndel1, Hif1a, Il1b, Scarf1, Vim, Robo1, Tspo, Kit, Mif,
GO:0009123	nucleoside monophosphate	0.00753 ( 17 of 2257 genes )	0.00638 ( 217 of 34011 annotated genes )	0.1306	1	Nppa, Apoe, Atic, Abca1, Lhb, Crh, Ak2, Guk1, Aipl1, Gnai3, Gnai2, Vip, Calca, Adm, Ak4, Edn1, Gmps,
GO:0032956	regulation of actin cytos	0.00576 ( 13 of 2257 genes )	0.00465 ( 158 of 34011 annotated genes )	0.131	1	Prex1, Tmsb10, Myo1f, Epb4.9, Nck1, Gsn, Ccl24, Nphs1, Add2, Rhoa, Arhgap6, Plek, Edn1,
GO:0000460	maturation of 5.8S rRNA	0.00089 ( 2 of 2257 genes )	0.00032 ( 11 of 34011 annotated genes )	0.1312	1	Wdr12, Mphosph6,
GO:0002643	regulation of tolerance i	0.00089 ( 2 of 2257 genes )	0.00032 ( 11 of 34011 annotated genes )	0.1312	1	Cd86, Ccr7,
GO:0002921	negative regulation of hu	0.00089 ( 2 of 2257 genes )	0.00032 ( 11 of 34011 annotated genes )	0.1312	1	Cd59b, Fcgr2b,
GO:0006107	oxaloacetate metabolic pr	0.00089 ( 2 of 2257 genes )	0.00032 ( 11 of 34011 annotated genes )	0.1312	1	Mdh2, Cs,
GO:0007183	SMAD protein complex asse	0.00089 ( 2 of 2257 genes )	0.00032 ( 11 of 34011 annotated genes )	0.1312	1	Smad1, Fkbp1a,
GO:0007252	I-kappaB phosphorylation	0.00089 ( 2 of 2257 genes )	0.00032 ( 11 of 34011 annotated genes )	0.1312	1	Tlr2, Ikbkap,
GO:0009263	deoxyribonucleotide biosy	0.00089 ( 2 of 2257 genes )	0.00032 ( 11 of 34011 annotated genes )	0.1312	1	Rrm1, Guk1,
GO:0010669	epithelial structure main	0.00089 ( 2 of 2257 genes )	0.00032 ( 11 of 34011 annotated genes )	0.1312	1	Ldb2, Vsig1,
GO:0010875	positive regulation of ch	0.00089 ( 2 of 2257 genes )	0.00032 ( 11 of 34011 annotated genes )	0.1312	1	Abca1, Apoe,
GO:0021801	cerebral cortex radial gl	0.00089 ( 2 of 2257 genes )	0.00032 ( 11 of 34011 annotated genes )	0.1312	1	Srgap2, Lrp8,
GO:0030730	sequestering of triglycer	0.00089 ( 2 of 2257 genes )	0.00032 ( 11 of 34011 annotated genes )	0.1312	1	Il1b, Tnf,
GO:0032008	positive regulation of TO	0.00089 ( 2 of 2257 genes )	0.00032 ( 11 of 34011 annotated genes )	0.1312	1	Kdr, Mapksp1,
GO:0032438	melanosome organization	0.00089 ( 2 of 2257 genes )	0.00032 ( 11 of 34011 annotated genes )	0.1312	1	Lyst, Ap3b1,
GO:0032769	negative regulation of mo	0.00089 ( 2 of 2257 genes )	0.00032 ( 11 of 34011 annotated genes )	0.1312	1	Cnr1, Nfkb1,
GO:0032891	negative regulation of or	0.00089 ( 2 of 2257 genes )	0.00032 ( 11 of 34011 annotated genes )	0.1312	1	Thbs1, Tnf,
GO:0033700	phospholipid efflux	0.00089 ( 2 of 2257 genes )	0.00032 ( 11 of 34011 annotated genes )	0.1312	1	Abca1, Apoe,
GO:0034508	centromere complex assemb	0.00089 ( 2 of 2257 genes )	0.00032 ( 11 of 34011 annotated genes )	0.1312	1	Rnf4, Senp6,
GO:0042033	chemokine biosynthetic pr	0.00089 ( 2 of 2257 genes )	0.00032 ( 11 of 34011 annotated genes )	0.1312	1	Il1b, Tnf,
GO:0043517	positive regulation of DN	0.00089 ( 2 of 2257 genes )	0.00032 ( 11 of 34011 annotated genes )	0.1312	1	Eef1e1, Spred2,
GO:0045073	regulation of chemokine b	0.00089 ( 2 of 2257 genes )	0.00032 ( 11 of 34011 annotated genes )	0.1312	1	Il1b, Tnf,
GO:0045579	positive regulation of B	0.00089 ( 2 of 2257 genes )	0.00032 ( 11 of 34011 annotated genes )	0.1312	1	Pnp, Il2rg,
GO:0046033	AMP metabolic process	0.00089 ( 2 of 2257 genes )	0.00032 ( 11 of 34011 annotated genes )	0.1312	1	Ak2, Ak4,
GO:0046415	urate metabolic process	0.00089 ( 2 of 2257 genes )	0.00032 ( 11 of 34011 annotated genes )	0.1312	1	Abcg2, Pnp,
GO:0046851	negative regulation of bo	0.00089 ( 2 of 2257 genes )	0.00032 ( 11 of 34011 annotated genes )	0.1312	1	Calca, Cd38,
GO:0047496	vesicle transport along m	0.00089 ( 2 of 2257 genes )	0.00032 ( 11 of 34011 annotated genes )	0.1312	1	Ndel1, Map2k1,
GO:0050755	chemokine metabolic proce	0.00089 ( 2 of 2257 genes )	0.00032 ( 11 of 34011 annotated genes )	0.1312	1	Il1b, Tnf,
GO:0051383	kinetochore organization	0.00089 ( 2 of 2257 genes )	0.00032 ( 11 of 34011 annotated genes )	0.1312	1	Rnf4, Senp6,
GO:0051642	centrosome localization	0.00089 ( 2 of 2257 genes )	0.00032 ( 11 of 34011 annotated genes )	0.1312	1	Dync1li2, Ndel1,
GO:0061036	positive regulation of ca	0.00089 ( 2 of 2257 genes )	0.00032 ( 11 of 34011 annotated genes )	0.1312	1	Smad1, Cyr61,
GO:0051129	negative regulation of ce	0.00975 ( 22 of 2257 genes )	0.00861 ( 293 of 34011 annotated genes )	0.1326	1	Kdm3a, Tmsb10, Bnip3, Mtap1b, Dab2ip, Psen1, Ppp2r5a, Ywhah, Vim, Add2, Arhgap6, Vdac2, Bcl2l1, Fcgr2b, Epb4.9, Parl, Xaf1, Lgals1, Il1b, Gsn, Dpysl3, Psmd10,
GO:0009855	determination of bilatera	0.00354 ( 8 of 2257 genes )	0.00256 ( 87 of 34011 annotated genes )	0.1328	1	Tbx2, Rbpj, Gja1, Nphp3, Acvr2a, Hif1a, Ripply2, Psen1,
GO:0042035	regulation of cytokine bi	0.00354 ( 8 of 2257 genes )	0.00256 ( 87 of 34011 annotated genes )	0.1328	1	Thbs1, Il1a, Tlr2, Fcgr3, Il1b, Tnf, Nfkb1, Tlr1,
GO:0002065	columnar/cuboidal epithel	0.00133 ( 3 of 2257 genes )	0.00065 ( 22 of 34011 annotated genes )	0.1329	1	Wdr77, Sav1, Hif1a,
GO:0002548	monocyte chemotaxis	0.00133 ( 3 of 2257 genes )	0.00065 ( 22 of 34011 annotated genes )	0.1329	1	Ccr1, Calca, Ccl12,
GO:0006026	aminoglycan catabolic pro	0.00133 ( 3 of 2257 genes )	0.00065 ( 22 of 34011 annotated genes )	0.1329	1	Gns, Cd44, Chi3l1,
GO:0006099	tricarboxylic acid cycle	0.00133 ( 3 of 2257 genes )	0.00065 ( 22 of 34011 annotated genes )	0.1329	1	Mdh2, Suclg1, Cs,
GO:0009225	nucleotide-sugar metaboli	0.00133 ( 3 of 2257 genes )	0.00065 ( 22 of 34011 annotated genes )	0.1329	1	Guk1, Dpagt1, Csgalnact1,
GO:0009620	response to fungus	0.00133 ( 3 of 2257 genes )	0.00065 ( 22 of 34011 annotated genes )	0.1329	1	Clec7a, Tlr2, Clec4n,
GO:0035329	hippo signaling cascade	0.00133 ( 3 of 2257 genes )	0.00065 ( 22 of 34011 annotated genes )	0.1329	1	Stk3, Amotl1, Sav1,
GO:0042246	tissue regeneration	0.00133 ( 3 of 2257 genes )	0.00065 ( 22 of 34011 annotated genes )	0.1329	1	Gja1, Pkm2, Plau,
GO:0050654	chondroitin sulfate prote	0.00133 ( 3 of 2257 genes )	0.00065 ( 22 of 34011 annotated genes )	0.1329	1	Chst11, Csgalnact1, Cytl1,
GO:0051453	regulation of intracellul	0.00133 ( 3 of 2257 genes )	0.00065 ( 22 of 34011 annotated genes )	0.1329	1	Ppt1, Atp6v0c, Atp5b,
GO:0051693	actin filament capping	0.00133 ( 3 of 2257 genes )	0.00065 ( 22 of 34011 annotated genes )	0.1329	1	Gsn, Add2, Epb4.9,
GO:0051953	negative regulation of am	0.00133 ( 3 of 2257 genes )	0.00065 ( 22 of 34011 annotated genes )	0.1329	1	Cnr1, Tnf, Crh,
GO:0060749	mammary gland alveolus de	0.00133 ( 3 of 2257 genes )	0.00065 ( 22 of 34011 annotated genes )	0.1329	1	Prlr, Phb2, Hif1a,
GO:0061377	mammary gland lobule deve	0.00133 ( 3 of 2257 genes )	0.00065 ( 22 of 34011 annotated genes )	0.1329	1	Prlr, Phb2, Hif1a,
GO:0002228	natural killer cell media	0.00177 ( 4 of 2257 genes )	0.00100 ( 34 of 34011 annotated genes )	0.1329	1	Pvr, Gimap5, Lyst, Tap1,
GO:0010977	negative regulation of ne	0.00177 ( 4 of 2257 genes )	0.00100 ( 34 of 34011 annotated genes )	0.1329	1	Il1b, Vim, Dpysl3, Lgals1,
GO:0032436	positive regulation of pr	0.00177 ( 4 of 2257 genes )	0.00100 ( 34 of 34011 annotated genes )	0.1329	1	Rnf180, Dab2, Psen1, Psmd10,
GO:0042267	natural killer cell media	0.00177 ( 4 of 2257 genes )	0.00100 ( 34 of 34011 annotated genes )	0.1329	1	Pvr, Gimap5, Lyst, Tap1,
GO:0070228	regulation of lymphocyte	0.00177 ( 4 of 2257 genes )	0.00100 ( 34 of 34011 annotated genes )	0.1329	1	Cd44, Adam8, Serpinb9, Mif,
GO:0046488	phosphatidylinositol meta	0.00399 ( 9 of 2257 genes )	0.00297 ( 101 of 34011 annotated genes )	0.133	1	Pip5kl1, Pip5k1a, Pdgfa, Pigu, Alg9, Inpp5b, Ip6k1, Plek, Mtm1,
GO:0015711	organic anion transport	0.00266 ( 6 of 2257 genes )	0.00176 ( 60 of 34011 annotated genes )	0.1345	1	Tnf, Slco1a4, Agxt, Slco6b1, Slco1b2, Psen1,
GO:0046849	bone remodeling	0.00266 ( 6 of 2257 genes )	0.00176 ( 60 of 34011 annotated genes )	0.1345	1	Xdh, Calca, Gja1, Ctsk, Cd38, Adam8,
GO:0061136	regulation of proteasomal	0.00266 ( 6 of 2257 genes )	0.00176 ( 60 of 34011 annotated genes )	0.1345	1	Psmd14, Rnf180, Dab2, Commd1, Psen1, Psmd10,
GO:0071887	leukocyte apoptosis	0.00266 ( 6 of 2257 genes )	0.00176 ( 60 of 34011 annotated genes )	0.1345	1	Ccr7, Cd44, Adam8, Dnaja3, Serpinb9, Mif,
GO:0050772	positive regulation of ax	0.00222 ( 5 of 2257 genes )	0.00138 ( 47 of 34011 annotated genes )	0.1359	1	Scarf1, Robo1, Mtap1b, Ndel1, Mif,
GO:0046651	lymphocyte proliferation	0.00665 ( 15 of 2257 genes )	0.00556 ( 189 of 34011 annotated genes )	0.1377	1	Cd59b, Cd86, Fcgr2b, Psmb10, Pnp, Nck1, Cd38, Pdcd1lg2, Cd209a, Fkbp1a, Ripk2, Il1b, Ccr7, Dnaja3, Mif,
GO:0046879	hormone secretion	0.00665 ( 15 of 2257 genes )	0.00556 ( 189 of 34011 annotated genes )	0.1377	1	Cnr1, Ptpn11, Niacr1, Cd38, Hmgcr, Il1b, Tnf, Ppp3cb, Acvr2a, Osm, Rfx6, Crh, Adm, Rest, Edn1,
GO:0032319	regulation of Rho GTPase	0.00310 ( 7 of 2257 genes )	0.00218 ( 74 of 34011 annotated genes )	0.138	1	Ccl24, Pip5k1a, Dock4, Ccr7, Srgap2, Ndel1, Pkp4,
GO:0051017	actin filament bundle ass	0.00310 ( 7 of 2257 genes )	0.00218 ( 74 of 34011 annotated genes )	0.138	1	Add2, Rhoa, Arhgap6, Plek, Myo1b, Dpysl3, Tnfaip1,
GO:0051302	regulation of cell divisi	0.00310 ( 7 of 2257 genes )	0.00218 ( 74 of 34011 annotated genes )	0.138	1	Il1b, Pdgfa, Rhoa, Il1a, Cspp1, Txnip, Pkp4,
GO:0003231	cardiac ventricle develop	0.00399 ( 9 of 2257 genes )	0.00300 ( 102 of 34011 annotated genes )	0.1389	1	Rbpj, Hif1a, Fkbp1a, Fzd1, Ly6e, Tbx2, Sav1, Cyr61, Egln1,
GO:0043393	regulation of protein bin	0.00399 ( 9 of 2257 genes )	0.00300 ( 102 of 34011 annotated genes )	0.1389	1	Epb4.1, Ica1, Dab2, Fkbp1a, Psen1, Ifit1, Add2, Ifit2, Tmem173,
GO:0090068	positive regulation of ce	0.00399 ( 9 of 2257 genes )	0.00300 ( 102 of 34011 annotated genes )	0.1389	1	Il1a, Pkp4, Il1b, Tnf, Ranbp1, Pebp1, Rhoa, Cspp1, Edn1,
GO:0009799	specification of symmetry	0.00354 ( 8 of 2257 genes )	0.00259 ( 88 of 34011 annotated genes )	0.1392	1	Tbx2, Rbpj, Gja1, Nphp3, Acvr2a, Hif1a, Ripply2, Psen1,
GO:0030182	neuron differentiation	0.02481 ( 56 of 2257 genes )	0.02443 ( 831 of 34011 annotated genes )	0.1406	1	Egr2, Scn1b, Klf7, Psen1, Ywhah, Vim, Mir133b, Lamc1, Cd44, Tnik, Rest, Prex1, Kdr, Cnr1, Srgap2, Ndel1, Lamb1, Hif1a, Lgals1, Ppp2r5d, Pou3f2, Rnd1, Slc4a7, Dpysl2, Ppia, Ptpn11, Atxn10, Lhx5, Mtap1b, Grin3a, Sox21, Caprin1, Fzd1, Rhoa, Afg3l2, P2ry2, Emx2, Lrp8, Cyfip1, Pld2, Mif, Diap1, Rbpj, Gja1, Rgs6, Stat3, Il1b, Scarf1, Ager, Robo1, Dpysl3, Ncoa1, Ntng1, Adm, Map2k1, Prkca,
GO:0034621	cellular macromolecular c	0.01595 ( 36 of 2257 genes )	0.01508 ( 513 of 34011 annotated genes )	0.1408	1	Tmsb10, Nck1, Tuba8, Prlr, Rnf8, Pomp, H2afz, Hsp90aa1, Vdac2, Prex1, Epb4.9, Ttn, Senp6, Ccl24, Gsn, Ndufs4, Psmd10, Psmg1, Prpf6, Mtap1b, Rps2, Ssna1, Fkbp1a, Add2, Rhoa, Smad1, Plek, Diap1, Prpf31, Fgg, Nphs1, Cenpj, Tubb5, Rnf4, Dnaja3, Clint1,
GO:0031668	cellular response to extr	0.00487 ( 11 of 2257 genes )	0.00385 ( 131 of 34011 annotated genes )	0.141	1	Higd1a, Slc2a1, Psen1, Abca1, Atg13, Scoc, Larp1, Ncoa1, Pafah1b2, Ldha, Gsdmd,
GO:0010769	regulation of cell morpho	0.00620 ( 14 of 2257 genes )	0.00515 ( 175 of 34011 annotated genes )	0.1413	1	Mtap1b, Dab2ip, Caprin1, Ndel1, Psen1, Ywhah, Scarf1, Vim, Pou3f2, Robo1, Tnik, Lrp8, Tgfb1i1, Mif,
GO:0010564	regulation of cell cycle	0.01019 ( 23 of 2257 genes )	0.00914 ( 311 of 34011 annotated genes )	0.1415	1	Ptpn11, Mapkapk2, D7Ertd443e, Ywhah, Ranbp1, Rhoa, Cspp1, Anapc10, Bcl2l1, Osm, Mif, Il1a, Senp6, Obfc2a, Csnk2a1, Pkp4, Il1b, Tnf, Pebp1, Cenpj, Ndrg1, Rnf4, Edn1,
GO:0050767	regulation of neurogenesi	0.01374 ( 31 of 2257 genes )	0.01279 ( 435 of 34011 annotated genes )	0.1418	1	Scn1b, Mtap1b, Sox21, Caprin1, Psen1, Ywhah, Vim, Mir133b, Rhoa, P2ry2, Tnik, Lrp8, Rest, Mif, Prex1, Kdr, Cnr1, Rgs6, Ndel1, Hif1a, Lgals1, Il1b, Ppp2r5d, Scarf1, Robo1, Pou3f2, Dpysl3, Ncoa1, Tspo, Kit, Dpysl2,
GO:0008544	epidermis development	0.00753 ( 17 of 2257 genes )	0.00647 ( 220 of 34011 annotated genes )	0.1423	1	Ldb2, Pdgfa, Dsg4, Sox21, Psen1, Sprr3, Txnip, Plod1, Sav1, Il1a, Rbpj, Zfp750, Tnf, Pou3f2, Dact2, Plod3, Map2k1,
GO:0002700	regulation of production	0.00266 ( 6 of 2257 genes )	0.00179 ( 61 of 34011 annotated genes )	0.1423	1	Gimap5, Tnf, Fcgr2b, Tlr2, Xcl1, Mif,
GO:0051701	interaction with host	0.00266 ( 6 of 2257 genes )	0.00179 ( 61 of 34011 annotated genes )	0.1423	1	Ifit1, Tlr2, Ace2, Icam1, Bcl2l1, Tap1,
GO:0008624	induction of apoptosis by	0.00177 ( 4 of 2257 genes )	0.00103 ( 35 of 34011 annotated genes )	0.1436	1	Tnf, Tm2d1, Crh, Senp1,
GO:0030838	positive regulation of ac	0.00177 ( 4 of 2257 genes )	0.00103 ( 35 of 34011 annotated genes )	0.1436	1	Nphs1, Ccl24, Rhoa, Nck1,
GO:0006140	regulation of nucleotide	0.01152 ( 26 of 2257 genes )	0.01053 ( 358 of 34011 annotated genes )	0.144	1	Pip5k1a, Dab2ip, Tbc1d8, Apoe, Abca1, Lhb, Ccr7, Arhgap6, Crh, Tbc1d2b, Tbc1d5, Srgap2, Ndel1, Pkp4, Cnn3, Aipl1, Gnai3, Ccl24, Gnai2, Dock4, Calca, Vip, Pgam1, Adm, Edn1, Map2k1,
GO:0002440	production of molecular m	0.00399 ( 9 of 2257 genes )	0.00303 ( 103 of 34011 annotated genes )	0.1448	1	Gimap5, Tnf, Fcgr2b, Tlr2, Xcl1, Kit, Ctnnbl1, Rnf8, Mif,
GO:0007200	activation of phospholipa	0.00222 ( 5 of 2257 genes )	0.00141 ( 48 of 34011 annotated genes )	0.1449	1	Calca, Gpr139, Plek, Tgm2, Edn1,
GO:0061371	determination of heart le	0.00222 ( 5 of 2257 genes )	0.00141 ( 48 of 34011 annotated genes )	0.1449	1	Tbx2, Rbpj, Gja1, Hif1a, Psen1,
GO:2000242	negative regulation of re	0.00222 ( 5 of 2257 genes )	0.00141 ( 48 of 34011 annotated genes )	0.1449	1	Ifit1, Ccl4, Tnf, Wdr77, Rest,
GO:0008277	regulation of G-protein c	0.00310 ( 7 of 2257 genes )	0.00221 ( 75 of 34011 annotated genes )	0.1451	1	Rgs18, Calca, Plek, Grk4, Adm, Edn1, Pld2,
GO:0042594	response to starvation	0.00310 ( 7 of 2257 genes )	0.00221 ( 75 of 34011 annotated genes )	0.1451	1	Scoc, Atg13, Higd1a, Slc2a1, Larp1, Pafah1b2, Psen1,
GO:0002768	immune response-regulatin	0.00354 ( 8 of 2257 genes )	0.00262 ( 89 of 34011 annotated genes )	0.1456	1	Clec7a, Tlr2, Cd38, Psen1, Ripk2, Ccr7, Ube2n, C5ar1,
GO:0000280	nuclear division	0.00975 ( 22 of 2257 genes )	0.00873 ( 297 of 34011 annotated genes )	0.1461	1	Bub1b, Papd7, Rnf8, Ywhah, Ruvbl1, Ranbp1, Rhoa, Anapc10, Kif3b, Nsun2, Rrs1, Il1a, Cts7, Nudc, Il1b, Pinx1, Tnf, Pebp1, Mapre2, Edn1, Anapc13, Map2k1,
GO:0007067	mitosis	0.00975 ( 22 of 2257 genes )	0.00873 ( 297 of 34011 annotated genes )	0.1461	1	Bub1b, Papd7, Rnf8, Ywhah, Ruvbl1, Ranbp1, Rhoa, Anapc10, Kif3b, Nsun2, Rrs1, Il1a, Cts7, Nudc, Il1b, Pinx1, Tnf, Pebp1, Mapre2, Edn1, Anapc13, Map2k1,
GO:0051048	negative regulation of se	0.00487 ( 11 of 2257 genes )	0.00388 ( 132 of 34011 annotated genes )	0.1462	1	Cnr1, Ptpn11, Hmgcr, Il1b, Tnf, Bcr, Cx3cl1, Crh, Osm, Rest, Edn1,
GO:0009653	anatomical structure morp	0.05095 ( 115 of 2257 genes )	0.05278 ( 1795 of 34011 annotated genes )	0.1464	1	Anpep, Psmb10, Scn1b, Dab2, Psen1, Ywhah, Cd44, Chst11, Cyr61, Cysltr1, Egln1, Atp5b, Gpi1, Stk3, Ttn, Lamb1, Chi3l1, Gsn, Zmym4, Tnf, Sp8, Aldh1a1, Jmjd6, Pou3f2, Dact2, Nphp3, Slc4a7, Plod3, Adam9, Ptpn11, Lhx5, Dab2ip, Vsig1, Ecsit, Apoe, Stat1, Rhoa, Loxl2, Smad1, Adam8, Cx3cr1, Adam15, Cyfip1, Trove2, Mmp19, Il1a, Erap1, Rbpj, Cd34, Rab8a, Pkm2, Nphs1, Cx3cl1, Aspn, Ppap2b, Ccl12, Zfp640, Pr…
GO:0009072	aromatic amino acid famil	0.00133 ( 3 of 2257 genes )	0.00068 ( 23 of 34011 annotated genes )	0.1466	1	Aadat, Tdo2, Kynu,
GO:0010596	negative regulation of en	0.00133 ( 3 of 2257 genes )	0.00068 ( 23 of 34011 annotated genes )	0.1466	1	Thbs1, Csnk2b, Apoe,
GO:0014037	Schwann cell differentiat	0.00133 ( 3 of 2257 genes )	0.00068 ( 23 of 34011 annotated genes )	0.1466	1	Egr2, Pou3f2, Ndrg1,
GO:0014911	positive regulation of sm	0.00133 ( 3 of 2257 genes )	0.00068 ( 23 of 34011 annotated genes )	0.1466	1	P2ry2, Plau, Mif,
GO:0046131	pyrimidine ribonucleoside	0.00133 ( 3 of 2257 genes )	0.00068 ( 23 of 34011 annotated genes )	0.1466	1	Ctps, Nme4, Nme5,
GO:0046356	acetyl-CoA catabolic proc	0.00133 ( 3 of 2257 genes )	0.00068 ( 23 of 34011 annotated genes )	0.1466	1	Mdh2, Suclg1, Cs,
GO:0070534	protein K63-linked ubiqui	0.00133 ( 3 of 2257 genes )	0.00068 ( 23 of 34011 annotated genes )	0.1466	1	Ube2e3, Rnf4, Ube2n,
GO:0090207	regulation of triglycerid	0.00133 ( 3 of 2257 genes )	0.00068 ( 23 of 34011 annotated genes )	0.1466	1	Acsl5, Lmf1, Ldlr,
GO:0042327	positive regulation of ph	0.00930 ( 21 of 2257 genes )	0.00829 ( 282 of 34011 annotated genes )	0.1472	1	Pdgfa, Dab2, Psen1, Fzd1, Cd44, Acvr2a, Cyr61, Lrp8, Osm, Crh, Mif, Rps6ka4, Thbs1, Chi3l1, Il1b, Csnk2b, Tnf, Rap2c, Kit, Ppap2b, Prkca,
GO:0006814	sodium ion transport	0.00576 ( 13 of 2257 genes )	0.00476 ( 162 of 34011 annotated genes )	0.1496	1	Scn1b, Scn2a1, Accn3, Slc22a4, Cnksr3, Trpm2, Ywhah, Cxcl1, Atp1b3, Slc38a11, Slc23a2, Slc9a10, Slc13a1,
GO:0042742	defense response to bacte	0.00576 ( 13 of 2257 genes )	0.00476 ( 162 of 34011 annotated genes )	0.1496	1	Prg2, Myo1f, Tlr2, Rbpj, Defb3, Serpinb9, Defb2, Iigp1, Ripk2, Tnf, Lyst, Gbp6, C5ar1,
GO:0051960	regulation of nervous sys	0.01506 ( 34 of 2257 genes )	0.01426 ( 485 of 34011 annotated genes )	0.1499	1	Scn1b, Psen1, Ywhah, Vim, Mir133b, Tnik, Rest, Prex1, Kdr, Cnr1, Ndel1, Hif1a, Lgals1, Ppp2r5d, Pou3f2, Tspo, Dpysl2, Lhx5, Mtap1b, Caprin1, Sox21, Fzd1, Rhoa, P2ry2, Lrp8, Mif, Rgs6, Il1b, Scarf1, Robo1, Dpysl3, Ncoa1, Kit, Prkca,
GO:0051259	protein oligomerization	0.01152 ( 26 of 2257 genes )	0.01058 ( 360 of 34011 annotated genes )	0.1503	1	Birc2, Gch1, Pcbd2, Nudt21, Tnfaip1, Vwf, Ywhab, Hmgcr, Kcnb1, Aldh1a7, Ehd1, Mif, Gphn, Gja1, Tmed10, P2rx1, Tgm2, Apaf1, Dgkh, Gria2, Rrm1, Aldh1a1, Dpysl3, Prkab1, Aldoc, Map2k1,
GO:0008306	associative learning	0.00266 ( 6 of 2257 genes )	0.00182 ( 62 of 34011 annotated genes )	0.1504	1	Ppt1, Kit, Crh, Adam2, Hif1a, Hmgcr,
GO:0010923	negative regulation of ph	0.00266 ( 6 of 2257 genes )	0.00182 ( 62 of 34011 annotated genes )	0.1504	1	Tnf, Tmem225, Mki67ip, Farp1, Rrp1b, Fkbp1a,
GO:0030203	glycosaminoglycan metabol	0.00266 ( 6 of 2257 genes )	0.00182 ( 62 of 34011 annotated genes )	0.1504	1	Il1b, Gns, Cd44, Chst11, Itih3, Csgalnact1,
GO:0031047	gene silencing by RNA	0.00266 ( 6 of 2257 genes )	0.00182 ( 62 of 34011 annotated genes )	0.1504	1	Asz1, Lin28b, Ncbp2, Snd1, Xpo5, Mir196a-1,
GO:0006631	fatty acid metabolic proc	0.00930 ( 21 of 2257 genes )	0.00832 ( 283 of 34011 annotated genes )	0.1508	1	Hpgd, Acly, Insig2, Ch25h, Degs1, Tmem195, Scd2, Acsl5, Sc4mol, Ptgr1, Mif, Fasn, Elovl3, Cnr1, Acsm2, Far1, Acot2, Elovl2, Prkab1, Crat, Edn1,
GO:0001510	RNA methylation	0.00089 ( 2 of 2257 genes )	0.00035 ( 12 of 34011 annotated genes )	0.1516	1	Nsun2, Ftsjd2,
GO:0002016	regulation of blood volum	0.00089 ( 2 of 2257 genes )	0.00035 ( 12 of 34011 annotated genes )	0.1516	1	Ace2, Mif,
GO:0002230	positive regulation of de	0.00089 ( 2 of 2257 genes )	0.00035 ( 12 of 34011 annotated genes )	0.1516	1	Tmem173, Pycard,
GO:0002885	positive regulation of hy	0.00089 ( 2 of 2257 genes )	0.00035 ( 12 of 34011 annotated genes )	0.1516	1	Ccr7, Fcgr3,
GO:0006684	sphingomyelin metabolic p	0.00089 ( 2 of 2257 genes )	0.00035 ( 12 of 34011 annotated genes )	0.1516	1	Smpdl3b, Sgms2,
GO:0007080	mitotic metaphase plate c	0.00089 ( 2 of 2257 genes )	0.00035 ( 12 of 34011 annotated genes )	0.1516	1	Pinx1, Rrs1,
GO:0021534	cell proliferation in hin	0.00089 ( 2 of 2257 genes )	0.00035 ( 12 of 34011 annotated genes )	0.1516	1	Lhx5, C5ar1,
GO:0031269	pseudopodium assembly	0.00089 ( 2 of 2257 genes )	0.00035 ( 12 of 34011 annotated genes )	0.1516	1	Srgap2, Kit,
GO:0031954	positive regulation of pr	0.00089 ( 2 of 2257 genes )	0.00035 ( 12 of 34011 annotated genes )	0.1516	1	Pdgfa, Rap2c,
GO:0032373	positive regulation of st	0.00089 ( 2 of 2257 genes )	0.00035 ( 12 of 34011 annotated genes )	0.1516	1	Abca1, Apoe,
GO:0032376	positive regulation of ch	0.00089 ( 2 of 2257 genes )	0.00035 ( 12 of 34011 annotated genes )	0.1516	1	Abca1, Apoe,
GO:0032489	regulation of Cdc42 prote	0.00089 ( 2 of 2257 genes )	0.00035 ( 12 of 34011 annotated genes )	0.1516	1	Ccr7, Ndel1,
GO:0032968	positive regulation of tr	0.00089 ( 2 of 2257 genes )	0.00035 ( 12 of 34011 annotated genes )	0.1516	1	Tceb1, Map2k1,
GO:0033160	positive regulation of pr	0.00089 ( 2 of 2257 genes )	0.00035 ( 12 of 34011 annotated genes )	0.1516	1	Hsp90aa1, Tmem173,
GO:0042149	cellular response to gluc	0.00089 ( 2 of 2257 genes )	0.00035 ( 12 of 34011 annotated genes )	0.1516	1	Higd1a, Slc2a1,
GO:0042640	anagen	0.00089 ( 2 of 2257 genes )	0.00035 ( 12 of 34011 annotated genes )	0.1516	1	Dsg4, Psen1,
GO:0043088	regulation of Cdc42 GTPas	0.00089 ( 2 of 2257 genes )	0.00035 ( 12 of 34011 annotated genes )	0.1516	1	Ccr7, Ndel1,
GO:0043555	regulation of translation	0.00089 ( 2 of 2257 genes )	0.00035 ( 12 of 34011 annotated genes )	0.1516	1	Eif2s1, Fech,
GO:0043691	reverse cholesterol trans	0.00089 ( 2 of 2257 genes )	0.00035 ( 12 of 34011 annotated genes )	0.1516	1	Abca1, Apoe,
GO:0043922	negative regulation by ho	0.00089 ( 2 of 2257 genes )	0.00035 ( 12 of 34011 annotated genes )	0.1516	1	Ccl4, Rest,
GO:0045066	regulatory T cell differe	0.00089 ( 2 of 2257 genes )	0.00035 ( 12 of 34011 annotated genes )	0.1516	1	Gimap5, Il2rg,
[truncated: 1,432 more rows]
