# Supplementary material for: The Y chromosome as a regulatory element shaping immune cell transcriptomes and susceptibility to autoimmune disease
Source: HighWire-hosted journal article supplement (doi:10.1101/gr.156703.113), 2013-06-25
Supplement: Supplemental_Tables.zip [file Table S9_MS_B6overlap.xlsx]

## Sheet: Test.txt
Table S9. GO term analysis on genes conserved between the mouse (B6-ChrYSJL vs. B6) and human (CIS vs. Healthy controls) CD4+ T cell datasets (FDR<0.05). Terms with P<1.0E-3 are shown.
GOID	GO_term	Frequency	Genome frequency	P-value	Corrected P-value	Gene(s) Directly Annotated GOID list
GO:0044237	cellular metabolic proces	0.62812 ( 277 of 441 genes )	0.22384 ( 7613 of 34011 annotated genes )	6.239e-76	1.111e-72	Stat5b, Prkcb, Bcl11b, Hsp90aa1, Denr, Rpl7, Usp24, Eif5b, Uqcrh, Il12rb1, Ttll4, Itk, Rabgap1, Stub1, Foxn3, Nktr, Hcfc1, Vgll4, Tcp1, Eprs, Ubr5, Mark3, L3mbtl3, Ccl5, Dhx29, Nub1, Ccdc88c, Pum2, Map4k4, Erc1, Rab21, Celf2, Ptpn22, Ing4, Hdac4, Tnnc1, Cbl, Bat3, Brwd1, Obfc2a, Nat15, Pcmtd1, Tsn, Rev3l, Ddx3x, Vegfa, Snx13, Rpf1, Zmynd8, Rbm27, Dnajc11, P4ha1, Npr2, Cst3, Nt5c3l, Ppig, Dnajc1, …
GO:0044260	cellular macromolecule me	0.53515 ( 236 of 441 genes )	0.16512 ( 5616 of 34011 annotated genes )	1.77e-72	3.151e-69	Stat5b, Sec11a, Rhebl1, Ino80, Rps24, Psmb10, Csnk1a1, Prkcb, Nfkbid, Bcl11b, Hsp90aa1, Denr, Tnrc6b, Map3k5, Rpl7, Tnrc6a, Rps7, Crtc3, Atg7, Usp24, Eif5b, Il12rb1, Ttll4, Itk, Hnrnpm, Pja2, Ubtf, Ascc1, Bclaf1, Stub1, Foxn3, Nktr, Pim1, Zbtb20, Hcfc1, Vgll4, Tcp1, Dnajc8, Eprs, Fbxo11, Ubr5, Fbxo45, Mark3, L3mbtl3, Ccl5, Lrrfip1, Ptprc, Dhx29, Nub1, Ccdc88c, Trmt12, Edem3, Pum2, Map4k4, Gtf3c2,…
GO:0008152	metabolic process	0.66667 ( 294 of 441 genes )	0.26565 ( 9035 of 34011 annotated genes )	3.538e-71	6.297e-68	Stat5b, Cox4i1, Prkcb, Bcl11b, Hsp90aa1, Denr, Rpl7, Usp24, Eif5b, Uqcrh, Il12rb1, Ttll4, Itk, Rabgap1, Stub1, Foxn3, Nktr, Hcfc1, Vgll4, Tcp1, Eprs, Ubr5, Mark3, L3mbtl3, Ccl5, Dhx29, Reck, Nub1, Ccdc88c, Pum2, Map4k4, Erc1, Rab21, Celf2, Ptpn22, Ing4, Hdac4, Tnnc1, Cbl, Bat3, Brwd1, Obfc2a, Nat15, Add1, Pcmtd1, Tsn, Rev3l, Ddx3x, Vegfa, Snx13, Rpf1, Zmynd8, Rbm27, Cox7c, Dnajc11, P4ha1, Npr2, C…
GO:0044238	primary metabolic process	0.61224 ( 270 of 441 genes )	0.22525 ( 7661 of 34011 annotated genes )	6.811e-70	1.212e-66	Stat5b, Prkcb, Bcl11b, Hsp90aa1, Denr, Rpl7, Usp24, Eif5b, Il12rb1, Ttll4, Itk, Rabgap1, Stub1, Foxn3, Nktr, Hcfc1, Vgll4, Tcp1, Eprs, Ubr5, Mark3, L3mbtl3, Ccl5, Dhx29, Nub1, Ccdc88c, Pum2, Map4k4, Erc1, Rab21, Celf2, Ptpn22, Ing4, Hdac4, Tnnc1, Cbl, Bat3, Brwd1, Obfc2a, Nat15, Pcmtd1, Tsn, Rev3l, Ddx3x, Vegfa, Snx13, Rpf1, Rbm27, Dnajc11, P4ha1, Npr2, Cst3, Nt5c3l, Ppig, Dnajc1, Zbtb41, Arih2, …
GO:0043170	macromolecule metabolic p	0.55556 ( 245 of 441 genes )	0.18900 ( 6428 of 34011 annotated genes )	1.731e-67	3.082e-64	Stat5b, Sec11a, Rhebl1, Ino80, Rps24, Psmb10, Csnk1a1, Prkcb, Nfkbid, Bcl11b, Hsp90aa1, Denr, Tnrc6b, Map3k5, Rpl7, Tnrc6a, Rps7, Crtc3, Atg7, Usp24, Eif5b, Il12rb1, Ttll4, Itk, Hnrnpm, Pja2, Ubtf, Ascc1, Bclaf1, Stub1, Foxn3, Nktr, Pim1, Zbtb20, Hcfc1, Vgll4, Tcp1, Dnajc8, Eprs, Fbxo11, Ubr5, Fbxo45, Mark3, L3mbtl3, Ccl5, Lrrfip1, Ptprc, Psmd8, Dhx29, Nub1, Ccdc88c, Trmt12, Edem3, Pum2, Map4k4, …
GO:0009987	cellular process	0.78005 ( 344 of 441 genes )	0.39346 (13382 of 34011 annotated genes )	1.268e-63	2.256e-60	Stat5b, Prkcb, Ap3m1, Bcl11b, Hsp90aa1, Denr, Rpl7, Usp24, Eif5b, Rnf17, Uqcrh, Il12rb1, Ttll4, Itk, Copb1, Rabgap1, Ap2b1, Stub1, Sdccag1, Foxn3, Nktr, Hcfc1, Rtn4, Vgll4, Tcp1, Eprs, Ubr5, Mark3, L3mbtl3, Ccl5, Dhx29, Xpo7, Vdac3, Reck, Nub1, Ccdc88c, Rufy3, Pum2, Map4k4, Erc1, Tctn1, Als2cl, Rab21, Celf2, Ptpn22, Clic1, Ing4, Numb, Hdac4, Tnnc1, Cbl, Bat3, Brwd1, Tes, Obfc2a, Nat15, Add1, Snx2…
GO:0044267	cellular protein metaboli	0.33787 ( 149 of 441 genes )	0.08527 ( 2900 of 34011 annotated genes )	1.294e-51	2.304e-48	Sec11a, Rps24, Psmb10, Csnk1a1, Prkcb, Hsp90aa1, Denr, Tnrc6b, Map3k5, Rpl7, Tnrc6a, Rps7, Atg7, Usp24, Eif5b, Il12rb1, Ttll4, Itk, Pja2, Stub1, Nktr, Pim1, Hcfc1, Tcp1, Dnajc8, Eprs, Fbxo11, Ubr5, Fbxo45, Mark3, Ccl5, Ptprc, Dhx29, Nub1, Ccdc88c, Edem3, Pum2, Map4k4, Creb1, Erc1, Pum1, Ttll5, Gnas, Ptpn22, Sod1, Ppp1r12a, Ing4, Prkcd, Hdac4, Sec11c, Mocos, Cbl, Bat3, Morf4l1, Nat15, Pcmtd1, Myst…
GO:0019538	protein metabolic process	0.35601 ( 157 of 441 genes )	0.10229 ( 3479 of 34011 annotated genes )	2.02e-47	3.595e-44	Sec11a, Rps24, Psmb10, Csnk1a1, Prkcb, Hsp90aa1, Denr, Tnrc6b, Map3k5, Rpl7, Tnrc6a, Rps7, Atg7, Usp24, Eif5b, Il12rb1, Ttll4, Itk, Pja2, Stub1, Nktr, Pim1, Hcfc1, Tcp1, Dnajc8, Eprs, Fbxo11, Ubr5, Fbxo45, Mark3, Ccl5, Ptprc, Psmd8, Dhx29, Nub1, Ccdc88c, Edem3, Pum2, Map4k4, Creb1, Erc1, Pum1, Ttll5, Gnas, Ptpn22, Sod1, Ppp1r12a, Ing4, Prkcd, Hdac4, Sec11c, Adam28, Mocos, Cbl, Bat3, Morf4l1, Nat1…
GO:0006139	nucleobase, nucleoside, n	0.38776 ( 171 of 441 genes )	0.12602 ( 4286 of 34011 annotated genes )	5.148e-45	9.163e-42	Stat5b, Rhebl1, Ino80, Rps24, Zc3hav1, Prkcb, Nfkbid, Bcl11b, Hsp90aa1, Rab13, Rpl7, Rps7, Crtc3, Hnrnpm, Ubtf, Rabgap1, Ascc1, Bclaf1, Stub1, Foxn3, Pim1, Zbtb20, Hcfc1, Vgll4, Eprs, L3mbtl3, Ccl5, Lrrfip1, Ptprc, Trmt12, Gtf3c2, Malat1, Creb1, Foxp1, Ttll5, Gnas, Rab21, Celf2, Nasp, Sod1, Ppp1r12a, Ing4, Hdac4, Tnnc1, Supt4h1, Morf4l1, Brwd1, Obfc2a, Il16, Nfat5, Rbm39, Fdx1, Myst3, Tsn, Rev3l,…
GO:0034641	cellular nitrogen compoun	0.39909 ( 176 of 441 genes )	0.13631 ( 4636 of 34011 annotated genes )	1.326e-43	2.36e-40	Stat5b, Rhebl1, Ino80, Rps24, Zc3hav1, Prkcb, Nfkbid, Bcl11b, Hsp90aa1, Rab13, Rpl7, Rps7, Crtc3, Atg7, Hnrnpm, Ubtf, Rabgap1, Ascc1, Bclaf1, Stub1, Foxn3, Pim1, Zbtb20, Hcfc1, Vgll4, Eprs, L3mbtl3, Ccl5, Lrrfip1, Ptprc, Trmt12, Gtf3c2, Malat1, Creb1, Foxp1, Ttll5, Gnas, Rab21, Celf2, Nasp, Sod1, Ppp1r12a, Ing4, Hdac4, Tnnc1, Mocos, Supt4h1, Morf4l1, Brwd1, Obfc2a, Il16, Nfat5, Rbm39, Myst3, Fdx1…
GO:0006807	nitrogen compound metabol	0.39909 ( 176 of 441 genes )	0.13916 ( 4733 of 34011 annotated genes )	2.295e-42	4.085e-39	Stat5b, Rhebl1, Ino80, Rps24, Zc3hav1, Prkcb, Nfkbid, Bcl11b, Hsp90aa1, Rab13, Rpl7, Rps7, Crtc3, Atg7, Hnrnpm, Ubtf, Rabgap1, Ascc1, Bclaf1, Stub1, Foxn3, Pim1, Zbtb20, Hcfc1, Vgll4, Eprs, L3mbtl3, Ccl5, Lrrfip1, Ptprc, Trmt12, Gtf3c2, Malat1, Creb1, Foxp1, Ttll5, Gnas, Rab21, Celf2, Nasp, Sod1, Ppp1r12a, Ing4, Hdac4, Tnnc1, Mocos, Supt4h1, Morf4l1, Brwd1, Obfc2a, Il16, Nfat5, Rbm39, Myst3, Fdx1…
GO:0090304	nucleic acid metabolic pr	0.32426 ( 143 of 441 genes )	0.10308 ( 3506 of 34011 annotated genes )	1.436e-37	2.555e-34	Stat5b, Rhebl1, Ino80, Rps24, Prkcb, Nfkbid, Bcl11b, Rpl7, Rps7, Crtc3, Hnrnpm, Ubtf, Ascc1, Bclaf1, Stub1, Foxn3, Pim1, Zbtb20, Hcfc1, Vgll4, Eprs, L3mbtl3, Ccl5, Lrrfip1, Ptprc, Trmt12, Gtf3c2, Malat1, Creb1, Foxp1, Ttll5, Gnas, Celf2, Nasp, Sod1, Ppp1r12a, Ing4, Hdac4, Supt4h1, Morf4l1, Brwd1, Obfc2a, Il16, Nfat5, Rbm39, Myst3, Tsn, Rev3l, Vegfa, Tcf25, Wdr33, Wac, Rpf1, Rbm27, Tada3, Cst3, Zb…
GO:0010467	gene expression	0.33560 ( 148 of 441 genes )	0.11032 ( 3752 of 34011 annotated genes )	2.135e-37	3.8e-34	Stat5b, Sec11a, Rhebl1, Ino80, Rps24, Prkcb, Nfkbid, Bcl11b, Denr, Tnrc6b, Rpl7, Tnrc6a, Rps7, Crtc3, Eif5b, Hnrnpm, Ubtf, Ascc1, Bclaf1, Stub1, Foxn3, Pim1, Zbtb20, Hcfc1, Vgll4, Eprs, L3mbtl3, Ccl5, Lrrfip1, Dhx29, Ccdc88c, Trmt12, Pum2, Gtf3c2, Malat1, Creb1, Foxp1, Pum1, Ttll5, Gnas, Celf2, Ppp1r12a, Ing4, Hdac4, Sec11c, Supt4h1, Bat3, Morf4l1, Brwd1, Il16, Nfat5, Rbm39, Myst3, Vegfa, Tcf25, …
GO:0006464	protein modification proc	0.24717 ( 109 of 441 genes )	0.06563 ( 2232 of 34011 annotated genes )	1.432e-34	2.549e-31	Csnk1a1, Cdk13, Prkcb, Atxn7, Usp28, Ehmt1, Map3k5, Mll5, Ikbkb, Usp37, Pecam1, Atg7, Trim27, Epc1, Mysm1, Cops6, Il12rb1, Ttll4, Itk, Usp7, Pja2, Ppp3ca, Stub1, Pim1, Prkar1a, Hcfc1, Dapk1, Brd4, Ttll3, Ilf3, Smad4, Sik3, Fbxo11, Ubr5, Pdk1, Fbxo45, Mark3, Ccl5, Ptprc, Eed, Aimp2, Nckap1l, Nub1, Klhl20, Ccdc88c, Map4k4, Creb1, Parp2, Satb1, Ube2d3, Erc1, Cdc27, Iqgap1, Ttll5, Gnas, Ccnd2, Cdkl3,…
GO:0009059	macromolecule biosyntheti	0.30612 ( 135 of 441 genes )	0.10073 ( 3426 of 34011 annotated genes )	1.255e-33	2.233e-30	Stat5b, Rhebl1, Ino80, Rps24, Prkcb, Nfkbid, Bcl11b, Denr, Tnrc6b, Rpl7, Tnrc6a, Rps7, Crtc3, Atg7, Eif5b, Ubtf, Ascc1, Bclaf1, Foxn3, Pim1, Zbtb20, Hcfc1, Vgll4, Eprs, L3mbtl3, Lrrfip1, Ptprc, Dhx29, Pum2, Gtf3c2, Creb1, Foxp1, Pum1, Ttll5, Gnas, Nasp, Ppp1r12a, Ing4, Prkcd, Hdac4, Supt4h1, Morf4l1, Brwd1, Il16, Nfat5, Rbm39, Myst3, Rev3l, Vegfa, Tcf25, Wac, Tada3, Cst3, Dnajc1, Zbtb41, Sfpq, Rq…
GO:0043412	macromolecule modificatio	0.24717 ( 109 of 441 genes )	0.06795 ( 2311 of 34011 annotated genes )	3.089e-33	5.498e-30	Csnk1a1, Cdk13, Prkcb, Atxn7, Usp28, Ehmt1, Map3k5, Mll5, Ikbkb, Usp37, Pecam1, Atg7, Trim27, Epc1, Mysm1, Cops6, Il12rb1, Ttll4, Itk, Usp7, Pja2, Ppp3ca, Stub1, Pim1, Prkar1a, Hcfc1, Dapk1, Brd4, Ttll3, Ilf3, Smad4, Sik3, Fbxo11, Ubr5, Pdk1, Fbxo45, Mark3, Ccl5, Ptprc, Eed, Aimp2, Nckap1l, Nub1, Klhl20, Ccdc88c, Map4k4, Creb1, Parp2, Satb1, Ube2d3, Erc1, Cdc27, Iqgap1, Ttll5, Gnas, Ccnd2, Cdkl3,…
GO:0034645	cellular macromolecule bi	0.29932 ( 132 of 441 genes )	0.09820 ( 3340 of 34011 annotated genes )	6.41e-33	1.141e-29	Stat5b, Rhebl1, Ino80, Rps24, Prkcb, Nfkbid, Bcl11b, Denr, Tnrc6b, Rpl7, Tnrc6a, Rps7, Crtc3, Atg7, Eif5b, Ubtf, Ascc1, Bclaf1, Foxn3, Pim1, Zbtb20, Hcfc1, Vgll4, Eprs, L3mbtl3, Lrrfip1, Dhx29, Pum2, Gtf3c2, Creb1, Foxp1, Pum1, Ttll5, Gnas, Nasp, Ppp1r12a, Ing4, Hdac4, Supt4h1, Morf4l1, Brwd1, Il16, Nfat5, Rbm39, Myst3, Rev3l, Vegfa, Tcf25, Wac, Tada3, Cst3, Dnajc1, Zbtb41, Sfpq, Rqcd1, Naa15, Me…
GO:0016070	RNA metabolic process	0.28571 ( 126 of 441 genes )	0.09182 ( 3123 of 34011 annotated genes )	3.98e-32	7.085e-29	Stat5b, Rhebl1, Ino80, Rps24, Cdk13, Prkcb, Atxn7, Nfkbid, Ehmt1, Bcl11b, Tesc, Rpl7, Mll5, Ikbkb, Rps7, Crtc3, Trim27, Epc1, Bcas2, Jmjd1c, Mysm1, Flii, Stat6, Hnrnpm, Usp7, Csde1, Helb, Ubtf, Nfatc3, Mif4gd, Ppp3ca, Ascc1, Mbnl1, Bclaf1, Foxn3, Pim1, Zbtb20, Med13, Hcfc1, Vgll4, Brd4, Eprs, Ilf3, Smad4, Banp, Ccpg1, Smg7, L3mbtl3, Gtf3c6, Runx1, Prpf31, Cdk5rap3, Ccl5, Lrrfip1, Rbm5, Eed, Bbx, …
GO:0031323	regulation of cellular me	0.32200 ( 142 of 441 genes )	0.11417 ( 3883 of 34011 annotated genes )	4.246e-32	7.557e-29	Stat5b, Rhebl1, Ino80, Zc3hav1, Prkcb, Nfkbid, Bcl11b, Hsp90aa1, Tnrc6b, Map3k5, Tnrc6a, Crtc3, Atg7, Eif5b, Ubtf, Rabgap1, Ascc1, Bclaf1, Stub1, Foxn3, Pim1, Zbtb20, Hcfc1, Vgll4, L3mbtl3, Ccl5, Lrrfip1, Ptprc, Nub1, Ccdc88c, Pum2, Malat1, Creb1, Foxp1, Pum1, Gnas, Sod1, Ppp1r12a, Ing4, Prkcd, Hdac4, Tnnc1, Supt4h1, Bat3, Morf4l1, Brwd1, Il16, Nfat5, Rbm39, Myst3, Vegfa, Snx13, Tcf25, Wac, Ppp6r…
GO:0080090	regulation of primary met	0.31746 ( 140 of 441 genes )	0.11152 ( 3793 of 34011 annotated genes )	5.251e-32	9.347e-29	Stat5b, Rhebl1, Ino80, Zc3hav1, Prkcb, Nfkbid, Bcl11b, Tnrc6b, Map3k5, Tnrc6a, Crtc3, Atg7, Eif5b, Ubtf, Rabgap1, Ascc1, Bclaf1, Stub1, Foxn3, Pim1, Zbtb20, Hcfc1, Vgll4, L3mbtl3, Ccl5, Lrrfip1, Ptprc, Nub1, Ccdc88c, Pum2, Malat1, Creb1, Foxp1, Pum1, Gnas, Sod1, Ppp1r12a, Ing4, Prkcd, Hdac4, Tnnc1, Supt4h1, Bat3, Morf4l1, Brwd1, Il16, Nfat5, Rbm39, Myst3, Vegfa, Snx13, Tcf25, Wac, Tada3, Cst3, Du…
GO:0019222	regulation of metabolic p	0.34921 ( 154 of 441 genes )	0.13337 ( 4536 of 34011 annotated genes )	1.516e-31	2.699e-28	Stat5b, Rhebl1, Ino80, Zc3hav1, Prkcb, Nfkbid, Bcl11b, Hsp90aa1, Tnrc6b, Map3k5, Tnrc6a, Crtc3, Atg7, Eif5b, Itk, Ubtf, Rabgap1, Ascc1, Bclaf1, Stub1, Foxn3, Pim1, Zbtb20, Hcfc1, Vgll4, L3mbtl3, Ccl5, Lrrfip1, Ptprc, Reck, Nub1, Ccdc88c, Pum2, Malat1, Creb1, Foxp1, Pum1, Gnas, Sod1, Ppp1r12a, Ing4, Prkcd, Hdac4, Tnnc1, Supt4h1, Bat3, Morf4l1, Brwd1, Il16, Nfat5, Rbm39, Fdx1, Myst3, Vegfa, Snx13, …
GO:0060255	regulation of macromolecu	0.31066 ( 137 of 441 genes )	0.11073 ( 3766 of 34011 annotated genes )	1.397e-30	2.487e-27	Stat5b, Rhebl1, Ino80, Prkcb, Nfkbid, Bcl11b, Tnrc6b, Map3k5, Tnrc6a, Crtc3, Atg7, Eif5b, Ubtf, Ascc1, Bclaf1, Stub1, Foxn3, Pim1, Zbtb20, Hcfc1, Vgll4, L3mbtl3, Ccl5, Lrrfip1, Ptprc, Nub1, Ccdc88c, Pum2, Malat1, Creb1, Foxp1, Pum1, Gnas, Sod1, Ppp1r12a, Ing4, Prkcd, Hdac4, Supt4h1, Bat3, Morf4l1, Brwd1, Il16, Nfat5, Rbm39, Myst3, Vegfa, Tcf25, Wac, Tada3, Cst3, Dusp10, Dnajc1, Zbtb41, Sfpq, Rqcd…
GO:0044249	cellular biosynthetic pro	0.32653 ( 144 of 441 genes )	0.12202 ( 4150 of 34011 annotated genes )	3.575e-30	6.363e-27	Stat5b, Rhebl1, Ino80, Rps24, Prkcb, Nfkbid, Bcl11b, Hsp90aa1, Denr, Tnrc6b, Rpl7, Tnrc6a, Rps7, Crtc3, Atg7, Eif5b, Ubtf, Ascc1, Bclaf1, Foxn3, Pim1, Zbtb20, Hcfc1, Vgll4, Eprs, L3mbtl3, Ccl5, Lrrfip1, Dhx29, Pum2, Gtf3c2, Creb1, Foxp1, Pum1, Ttll5, Gnas, Nasp, Sod1, Ppp1r12a, Ing4, Prkcd, Hdac4, Mocos, Supt4h1, Morf4l1, Brwd1, Il16, Nfat5, Rbm39, Myst3, Rev3l, Vegfa, Tcf25, Wac, Tada3, Atp2c1, …
GO:0009058	biosynthetic process	0.33107 ( 146 of 441 genes )	0.12543 ( 4266 of 34011 annotated genes )	5.142e-30	9.152e-27	Stat5b, Rhebl1, Ino80, Rps24, Prkcb, Nfkbid, Bcl11b, Hsp90aa1, Denr, Tnrc6b, Rpl7, Tnrc6a, Rps7, Crtc3, Atg7, Eif5b, Ubtf, Ascc1, Bclaf1, Foxn3, Pim1, Zbtb20, Hcfc1, Vgll4, Eprs, L3mbtl3, Ccl5, Lrrfip1, Ptprc, Dhx29, Pum2, Gtf3c2, Creb1, Foxp1, Pum1, Ttll5, Gnas, Nasp, Sod1, Ppp1r12a, Ing4, Prkcd, Hdac4, Mocos, Supt4h1, Morf4l1, Brwd1, Il16, Nfat5, Rbm39, Myst3, Rev3l, Vegfa, Tcf25, Wac, Tada3, A…
GO:0065007	biological regulation	0.51701 ( 228 of 441 genes )	0.27182 ( 9245 of 34011 annotated genes )	1.419e-28	2.526e-25	Stat5b, Rhebl1, Ino80, Rps24, Csnk1a1, Zc3hav1, Prkcb, Nfkbid, Bcl11b, Hsp90aa1, Bub3, Rab13, Tnrc6b, Map3k5, Tnrc6a, Crtc3, Atg7, Eif5b, Il12rb1, Itk, Pja2, Ubtf, Rabgap1, Ascc1, Ap2b1, Bclaf1, Stub1, Foxn3, Pim1, Zbtb20, Hcfc1, Rtn4, Vgll4, Ubr5, Itpr1, Clip1, L3mbtl3, Ccl5, Lrrfip1, Ptprc, Vdac3, Reck, Nub1, Ccdc88c, Rufy3, Pum2, Map4k4, Malat1, Creb1, Erc1, Foxp1, Anxa6, Zc3h15, Tctn1, Pum1, …
GO:0050789	regulation of biological	0.50113 ( 221 of 441 genes )	0.25965 ( 8831 of 34011 annotated genes )	2.925e-28	5.206e-25	Stat5b, Rhebl1, Ino80, Csnk1a1, Zc3hav1, Prkcb, Nfkbid, Bcl11b, Hsp90aa1, Bub3, Rab13, Tnrc6b, Map3k5, Tnrc6a, Crtc3, Atg7, Eif5b, Il12rb1, Itk, Pja2, Ubtf, Rabgap1, Ascc1, Bclaf1, Stub1, Foxn3, Pim1, Zbtb20, Hcfc1, Rtn4, Vgll4, Ubr5, Itpr1, Clip1, L3mbtl3, Ccl5, Lrrfip1, Ptprc, Vdac3, Reck, Nub1, Ccdc88c, Rufy3, Pum2, Map4k4, Malat1, Creb1, Erc1, Foxp1, Anxa6, Zc3h15, Tctn1, Pum1, Als2cl, Gnas, …
GO:0050794	regulation of cellular pr	0.48073 ( 212 of 441 genes )	0.24345 ( 8280 of 34011 annotated genes )	4.589e-28	8.169e-25	Stat5b, Rhebl1, Ino80, Csnk1a1, Zc3hav1, Prkcb, Nfkbid, Bcl11b, Hsp90aa1, Bub3, Rab13, Tnrc6b, Map3k5, Tnrc6a, Crtc3, Atg7, Eif5b, Il12rb1, Itk, Pja2, Ubtf, Rabgap1, Ascc1, Bclaf1, Stub1, Foxn3, Pim1, Zbtb20, Hcfc1, Rtn4, Vgll4, Ubr5, Itpr1, Clip1, L3mbtl3, Ccl5, Lrrfip1, Ptprc, Nub1, Ccdc88c, Rufy3, Pum2, Map4k4, Malat1, Creb1, Erc1, Foxp1, Zc3h15, Tctn1, Pum1, Als2cl, Gnas, Rab21, Ptpn22, Clic1…
GO:0010468	regulation of gene expres	0.26304 ( 116 of 441 genes )	0.08894 ( 3025 of 34011 annotated genes )	2.116e-27	3.766e-24	Stat5b, Rhebl1, Ino80, Cdk13, Prkcb, Atxn7, Nfkbid, Ehmt1, Bcl11b, Tnrc6b, Tesc, Tnrc6a, Mll5, Ikbkb, Crtc3, Trim27, Epc1, Eif5b, Jmjd1c, Mysm1, Flii, Stat6, Usp7, Csde1, Ubtf, Nfatc3, Mif4gd, Ppp3ca, Ascc1, Mbnl1, Bclaf1, Foxn3, Pim1, Zbtb20, Med13, Hcfc1, Vgll4, Brd4, Ilf3, Smad4, Banp, Ccpg1, L3mbtl3, Runx1, Cdk5rap3, Ccl5, Lrrfip1, Rbm5, Eed, Bbx, Mga, Gabpb1, Kdm5a, Ccdc88c, Rdbp, Eif4e2, Pu…
GO:0051171	regulation of nitrogen co	0.26077 ( 115 of 441 genes )	0.08847 ( 3009 of 34011 annotated genes )	5.095e-27	9.069e-24	Stat5b, Rhebl1, Ino80, Cdk13, Zc3hav1, Prkcb, Atxn7, Nfkbid, Ehmt1, Bcl11b, Hsp90aa1, Tesc, Mll5, Ikbkb, Crtc3, Trim27, Epc1, Jmjd1c, Mysm1, Flii, Stat6, Usp7, Csde1, Ubtf, Rabgap1, Nfatc3, Ppp3ca, Ascc1, Mbnl1, Bclaf1, Foxn3, Pim1, Zbtb20, Med13, Hcfc1, Vgll4, Brd4, Ilf3, Smad4, Banp, Ccpg1, Stag2, L3mbtl3, Runx1, Cdk5rap3, Ccl5, Lrrfip1, Rbm5, Ptprc, Eed, Bbx, Nckap1l, Mga, Gabpb1, Kdm5a, Rdbp,…
GO:0019219	regulation of nucleobase,	0.25850 ( 114 of 441 genes )	0.08753 ( 2977 of 34011 annotated genes )	7.741e-27	1.378e-23	Stat5b, Rhebl1, Ino80, Cdk13, Zc3hav1, Prkcb, Atxn7, Nfkbid, Ehmt1, Bcl11b, Tesc, Mll5, Ikbkb, Crtc3, Trim27, Epc1, Jmjd1c, Mysm1, Flii, Stat6, Usp7, Csde1, Ubtf, Rabgap1, Nfatc3, Ppp3ca, Ascc1, Mbnl1, Bclaf1, Foxn3, Pim1, Zbtb20, Med13, Hcfc1, Vgll4, Brd4, Ilf3, Smad4, Banp, Ccpg1, Stag2, L3mbtl3, Runx1, Cdk5rap3, Ccl5, Lrrfip1, Rbm5, Ptprc, Eed, Bbx, Nckap1l, Mga, Gabpb1, Kdm5a, Rdbp, Malat1, C…
GO:0010556	regulation of macromolecu	0.24717 ( 109 of 441 genes )	0.08174 ( 2780 of 34011 annotated genes )	2.065e-26	3.676e-23	Stat5b, Rhebl1, Ino80, Cdk13, Prkcb, Atxn7, Nfkbid, Ehmt1, Bcl11b, Tnrc6b, Tesc, Tnrc6a, Mll5, Ikbkb, Crtc3, Trim27, Epc1, Eif5b, Jmjd1c, Mysm1, Flii, Pggt1b, Stat6, Usp7, Csde1, Ubtf, Nfatc3, Mif4gd, Ppp3ca, Ascc1, Bclaf1, Foxn3, Pim1, Zbtb20, Med13, Hcfc1, Vgll4, Brd4, Ilf3, Smad4, Banp, Ccpg1, Stag2, L3mbtl3, Runx1, Cdk5rap3, Lrrfip1, Eed, Bbx, Mga, Gabpb1, Kdm5a, Eif4e2, Rdbp, Pum2, Creb1, Sa…
GO:2000112	regulation of cellular ma	0.24263 ( 107 of 441 genes )	0.07971 ( 2711 of 34011 annotated genes )	3.99e-26	7.102e-23	Stat5b, Rhebl1, Ino80, Cdk13, Prkcb, Atxn7, Nfkbid, Ehmt1, Bcl11b, Tnrc6b, Tesc, Tnrc6a, Mll5, Ikbkb, Crtc3, Trim27, Epc1, Eif5b, Jmjd1c, Mysm1, Flii, Stat6, Usp7, Csde1, Ubtf, Nfatc3, Mif4gd, Ppp3ca, Ascc1, Bclaf1, Foxn3, Pim1, Zbtb20, Med13, Hcfc1, Vgll4, Brd4, Ilf3, Smad4, Banp, Ccpg1, Stag2, L3mbtl3, Runx1, Cdk5rap3, Lrrfip1, Eed, Bbx, Mga, Gabpb1, Kdm5a, Eif4e2, Rdbp, Pum2, Creb1, Satb1, Fox…
GO:0009889	regulation of biosyntheti	0.25397 ( 112 of 441 genes )	0.08718 ( 2965 of 34011 annotated genes )	7.798e-26	1.388e-22	Stat5b, Rhebl1, Ino80, Cdk13, Prkcb, Atxn7, Nfkbid, Ehmt1, Bcl11b, Hsp90aa1, Tnrc6b, Tesc, Tnrc6a, Mll5, Ikbkb, Crtc3, Trim27, Epc1, Eif5b, Jmjd1c, Mysm1, Flii, Pggt1b, Stat6, Usp7, Csde1, Ubtf, Nfatc3, Mif4gd, Ppp3ca, Ascc1, Bclaf1, Foxn3, Pim1, Zbtb20, Med13, Hcfc1, Vgll4, Brd4, Ilf3, Smad4, Banp, Ccpg1, Stag2, L3mbtl3, Runx1, Cdk5rap3, Ccl5, Lrrfip1, Eed, Bbx, Mga, Gabpb1, Kdm5a, Rdbp, Eif4e2,…
GO:0071840	cellular component organi	0.28571 ( 126 of 441 genes )	0.10864 ( 3695 of 34011 annotated genes )	2.894e-25	5.151e-22	Ino80, Rps24, Psmb10, Csnk1a1, Prkcb, Atxn7, Ehmt1, Bcl11b, Atg13, Hsp90aa1, Dis3l2, Bub3, Cep68, Tesc, Rpl7, Mll5, Usp37, Pecam1, Rps7, Crtc3, Atg7, Trim27, Epc1, Jmjd1c, Mysm1, Uqcrh, Flii, Cog2, Ap2b1, Mbnl1, Bclaf1, Stub1, Vps24, Hcfc1, Rtn4, Brd4, Smad4, Banp, Stag2, Smc4, Bysl, Clip1, L3mbtl3, Prpf31, Ccl5, Rbm5, Eed, Nckap1l, Reck, Kdm5a, Ccdc88c, Rufy3, Rrp36, Smc5, Pum2, Malat1, Creb1, S…
GO:0071841	cellular component organi	0.24717 ( 109 of 441 genes )	0.08456 ( 2876 of 34011 annotated genes )	3.29e-25	5.857e-22	Ino80, Rps24, Csnk1a1, Prkcb, Atxn7, Ehmt1, Bcl11b, Atg13, Hsp90aa1, Dis3l2, Bub3, Cep68, Rpl7, Mll5, Usp37, Rps7, Atg7, Epc1, Jmjd1c, Mysm1, Flii, Cog2, Ap2b1, Mbnl1, Stub1, Hcfc1, Rtn4, Brd4, Smad4, Banp, Stag2, Smc4, Bysl, Clip1, L3mbtl3, Prpf31, Ccl5, Rbm5, Eed, Nckap1l, Reck, Kdm5a, Ccdc88c, Rufy3, Rrp36, Smc5, Pum2, Malat1, Creb1, Satb1, Ranbp10, Foxp1, Cdc27, Tctn1, Als2cl, Celf2, Nasp, So…
GO:0031326	regulation of cellular bi	0.24943 ( 110 of 441 genes )	0.08609 ( 2928 of 34011 annotated genes )	3.809e-25	6.78e-22	Stat5b, Rhebl1, Ino80, Cdk13, Prkcb, Atxn7, Nfkbid, Ehmt1, Bcl11b, Hsp90aa1, Tnrc6b, Tesc, Tnrc6a, Mll5, Ikbkb, Crtc3, Trim27, Epc1, Eif5b, Jmjd1c, Mysm1, Flii, Stat6, Usp7, Csde1, Ubtf, Nfatc3, Mif4gd, Ppp3ca, Ascc1, Bclaf1, Foxn3, Pim1, Zbtb20, Med13, Hcfc1, Vgll4, Brd4, Ilf3, Smad4, Banp, Ccpg1, Stag2, L3mbtl3, Runx1, Cdk5rap3, Ccl5, Lrrfip1, Eed, Bbx, Mga, Gabpb1, Kdm5a, Eif4e2, Rdbp, Pum2, C…
GO:0032774	RNA biosynthetic process	0.23129 ( 102 of 441 genes )	0.07550 ( 2568 of 34011 annotated genes )	4.823e-25	8.585e-22	Stat5b, Rhebl1, Ino80, Cdk13, Prkcb, Atxn7, Nfkbid, Ehmt1, Bcl11b, Tesc, Mll5, Ikbkb, Crtc3, Trim27, Epc1, Jmjd1c, Mysm1, Flii, Stat6, Usp7, Csde1, Helb, Ubtf, Nfatc3, Ppp3ca, Ascc1, Bclaf1, Foxn3, Pim1, Zbtb20, Med13, Hcfc1, Vgll4, Brd4, Ilf3, Smad4, Banp, Ccpg1, L3mbtl3, Gtf3c6, Runx1, Cdk5rap3, Ccl5, Lrrfip1, Eed, Bbx, Mga, Gabpb1, Kdm5a, Rdbp, Gtf3c2, Creb1, Satb1, Foxp1, Ttll5, Bzw1, Gnas, C…
GO:0051252	regulation of RNA metabol	0.22902 ( 101 of 441 genes )	0.07533 ( 2562 of 34011 annotated genes )	1.549e-24	2.757e-21	Stat5b, Rhebl1, Ino80, Cdk13, Prkcb, Atxn7, Nfkbid, Ehmt1, Bcl11b, Tesc, Mll5, Ikbkb, Crtc3, Trim27, Epc1, Jmjd1c, Mysm1, Flii, Stat6, Usp7, Csde1, Ubtf, Nfatc3, Ppp3ca, Ascc1, Mbnl1, Bclaf1, Foxn3, Pim1, Zbtb20, Med13, Hcfc1, Vgll4, Brd4, Ilf3, Smad4, Banp, Ccpg1, L3mbtl3, Runx1, Cdk5rap3, Lrrfip1, Rbm5, Eed, Bbx, Mga, Gabpb1, Kdm5a, Rdbp, Malat1, Creb1, Satb1, Foxp1, Bzw1, Gnas, Cux1, Ing4, Ppp…
GO:0006351	transcription, DNA-depend	0.22676 ( 100 of 441 genes )	0.07530 ( 2561 of 34011 annotated genes )	5.707e-24	1.016e-20	Stat5b, Rhebl1, Ino80, Cdk13, Prkcb, Atxn7, Nfkbid, Ehmt1, Bcl11b, Tesc, Mll5, Ikbkb, Crtc3, Trim27, Epc1, Jmjd1c, Mysm1, Flii, Stat6, Usp7, Csde1, Ubtf, Nfatc3, Ppp3ca, Ascc1, Bclaf1, Foxn3, Pim1, Zbtb20, Med13, Hcfc1, Vgll4, Brd4, Ilf3, Smad4, Banp, Ccpg1, L3mbtl3, Gtf3c6, Runx1, Cdk5rap3, Lrrfip1, Eed, Bbx, Mga, Gabpb1, Kdm5a, Rdbp, Gtf3c2, Creb1, Satb1, Foxp1, Ttll5, Bzw1, Gnas, Cux1, Ing4, P…
GO:0006355	regulation of transcripti	0.21995 ( 97 of 441 genes )	0.07318 ( 2489 of 34011 annotated genes )	3.717e-23	6.616e-20	Stat5b, Rhebl1, Ino80, Cdk13, Prkcb, Atxn7, Nfkbid, Ehmt1, Bcl11b, Tesc, Mll5, Ikbkb, Crtc3, Trim27, Epc1, Jmjd1c, Mysm1, Flii, Stat6, Usp7, Csde1, Ubtf, Nfatc3, Ppp3ca, Ascc1, Bclaf1, Foxn3, Pim1, Zbtb20, Med13, Hcfc1, Vgll4, Brd4, Ilf3, Smad4, Banp, Ccpg1, L3mbtl3, Runx1, Cdk5rap3, Lrrfip1, Eed, Bbx, Mga, Gabpb1, Kdm5a, Rdbp, Creb1, Satb1, Foxp1, Bzw1, Gnas, Cux1, Ing4, Ppp1r12a, Hdac4, Supt4h1…
GO:0016043	cellular component organi	0.26984 ( 119 of 441 genes )	0.10476 ( 3563 of 34011 annotated genes )	5.785e-23	1.03e-19	Ino80, Psmb10, Csnk1a1, Prkcb, Atxn7, Ehmt1, Bcl11b, Atg13, Hsp90aa1, Dis3l2, Bub3, Cep68, Tesc, Mll5, Usp37, Pecam1, Crtc3, Atg7, Trim27, Epc1, Jmjd1c, Mysm1, Uqcrh, Flii, Cog2, Ap2b1, Mbnl1, Bclaf1, Stub1, Vps24, Hcfc1, Rtn4, Brd4, Smad4, Banp, Stag2, Smc4, Clip1, L3mbtl3, Prpf31, Ccl5, Rbm5, Eed, Nckap1l, Reck, Kdm5a, Ccdc88c, Rufy3, Smc5, Pum2, Malat1, Creb1, Satb1, Ranbp10, Foxp1, Cdc27, Tct…
GO:0071842	cellular component organi	0.23129 ( 102 of 441 genes )	0.08100 ( 2755 of 34011 annotated genes )	9.888e-23	1.76e-19	Ino80, Csnk1a1, Prkcb, Atxn7, Ehmt1, Bcl11b, Atg13, Hsp90aa1, Dis3l2, Bub3, Cep68, Mll5, Usp37, Atg7, Epc1, Jmjd1c, Mysm1, Flii, Cog2, Ap2b1, Mbnl1, Stub1, Hcfc1, Rtn4, Brd4, Smad4, Banp, Stag2, Smc4, Clip1, L3mbtl3, Prpf31, Ccl5, Rbm5, Eed, Nckap1l, Reck, Kdm5a, Ccdc88c, Rufy3, Smc5, Pum2, Malat1, Creb1, Satb1, Ranbp10, Foxp1, Cdc27, Tctn1, Als2cl, Celf2, Nasp, Sod1, Ing4, Ppp1r12a, Prex1, Numb,…
GO:0048518	positive regulation of bi	0.25170 ( 111 of 441 genes )	0.09382 ( 3191 of 34011 annotated genes )	1.091e-22	1.941e-19	Stat5b, Ino80, Zc3hav1, Exoc2, Prkcb, Atxn7, Usp28, Nfkbid, Bcl11b, Hsp90aa1, Map3k5, Tesc, Mll5, Ikbkb, Pecam1, Atg7, Epc1, Mysm1, Pggt1b, Stat6, Il12rb1, Itk, Usp7, Nfatc3, Ppp3ca, Bclaf1, Stub1, Pim1, Med13, Hcfc1, Rtn4, Ctla4, Dapk1, Brd4, Ilf3, Smad4, Ccpg1, Ubr5, Itpr1, Clip1, Runx1, Ncf2, Cdk5rap3, Ccl5, Rbm5, Ptprc, Aimp2, Nckap1l, Gabpb1, Nub1, Kdm5a, Cd37, Smc5, Creb1, Foxp1, Gnas, Ccnd…
GO:0006996	organelle organization	0.18367 ( 81 of 441 genes )	0.05448 ( 1853 of 34011 annotated genes )	2.707e-22	4.819e-19	Ino80, Csnk1a1, Prkcb, Atxn7, Ehmt1, Atg13, Hsp90aa1, Dis3l2, Bub3, Cep68, Mll5, Usp37, Atg7, Epc1, Jmjd1c, Mysm1, Flii, Cog2, Ap2b1, Hcfc1, Rtn4, Brd4, Banp, Stag2, Smc4, Clip1, L3mbtl3, Eed, Nckap1l, Kdm5a, Ccdc88c, Smc5, Malat1, Ranbp10, Satb1, Foxp1, Cdc27, Als2cl, Nasp, Sod1, Ing4, Ppp1r12a, Prex1, Prkcd, Hdac4, Actr2, Bat3, Whsc1l1, Morf4l1, Brwd1, Nat15, Sh3kbp1, Smchd1, Add1, Bptf, Hist3h…
GO:0048522	positive regulation of ce	0.22902 ( 101 of 441 genes )	0.08441 ( 2871 of 34011 annotated genes )	7.041e-21	1.253e-17	Stat5b, Ino80, Zc3hav1, Exoc2, Prkcb, Atxn7, Usp28, Nfkbid, Bcl11b, Hsp90aa1, Map3k5, Tesc, Mll5, Pecam1, Atg7, Epc1, Mysm1, Pggt1b, Stat6, Il12rb1, Usp7, Nfatc3, Ppp3ca, Bclaf1, Stub1, Pim1, Med13, Rtn4, Ctla4, Dapk1, Brd4, Ilf3, Smad4, Ccpg1, Ubr5, Clip1, Runx1, Ncf2, Cdk5rap3, Ccl5, Rbm5, Ptprc, Aimp2, Nckap1l, Gabpb1, Nub1, Kdm5a, Smc5, Creb1, Foxp1, Gnas, Ccnd2, Clic1, Ptpra, Stk4, Cd86, Ing…
GO:0006796	phosphate metabolic proce	0.15193 ( 67 of 441 genes )	0.04987 ( 1696 of 34011 annotated genes )	3.045e-16	5.42e-13	Csnk1a1, Cdk13, Prkcb, Atxn7, Nt5c, Map3k5, Ikbkb, Pecam1, Trim27, Uqcrh, Il12rb1, Itk, Ppp3ca, Pim1, Prkar1a, Dapk1, Brd4, Smad4, Sik3, Pdk1, Mark3, Inpp4b, Ccl5, Ptprc, Nckap1l, Ccdc88c, Pi4k2a, Map4k4, Creb1, Erc1, Iqgap1, Gnas, Cdkl3, Ccnd2, Ptpn22, Ptpra, Tesk1, Sod1, Stk4, Ppp1r12a, Ppm1b, Prkcd, Sh3kbp1, Stk16, Pdpk1, Vegfa, Rictor, Cdkn1b, Ppm1a, Zmynd8, Ppp6r3, Ep300, Ibtk, Itpkb, Ikbke,…
GO:0006793	phosphorus metabolic proc	0.15193 ( 67 of 441 genes )	0.04993 ( 1698 of 34011 annotated genes )	3.227e-16	5.744e-13	Csnk1a1, Cdk13, Prkcb, Atxn7, Nt5c, Map3k5, Ikbkb, Pecam1, Trim27, Uqcrh, Il12rb1, Itk, Ppp3ca, Pim1, Prkar1a, Dapk1, Brd4, Smad4, Sik3, Pdk1, Mark3, Inpp4b, Ccl5, Ptprc, Nckap1l, Ccdc88c, Pi4k2a, Map4k4, Creb1, Erc1, Iqgap1, Gnas, Cdkl3, Ccnd2, Ptpn22, Ptpra, Tesk1, Sod1, Stk4, Ppp1r12a, Ppm1b, Prkcd, Sh3kbp1, Stk16, Pdpk1, Vegfa, Rictor, Cdkn1b, Ppm1a, Zmynd8, Ppp6r3, Ep300, Ibtk, Itpkb, Ikbke,…
GO:0048519	negative regulation of bi	0.20862 ( 92 of 441 genes )	0.08559 ( 2911 of 34011 annotated genes )	5.29e-16	9.417e-13	Stat5b, Prkcb, Atxn7, Usp28, Nfkbid, Ehmt1, Bcl11b, Dis3l2, Bub3, Tnrc6b, Tesc, Tnrc6a, Mll5, Atg7, Trim27, Epc1, Pggt1b, Stat6, Ubtf, Ppp3ca, Bclaf1, Foxn3, Pim1, Zbtb20, Rtn4, Ctla4, Dapk1, Ilf3, Smad4, Banp, Stag2, Itpr1, Runx1, Ccl5, Ptprc, Aimp2, Nckap1l, Klhl20, Rufy3, Rdbp, Creb1, Satb1, Foxp1, Iqgap1, Cflar, Ptpn22, Cux1, Stk4, Sod1, Cd86, Ing4, Numb, Prkcd, Hdac4, Supt4h1, Cbl, Bat3, Tes…
GO:0051276	chromosome organization	0.08617 ( 38 of 441 genes )	0.01764 ( 600 of 34011 annotated genes )	9.221e-16	1.641e-12	Ino80, Smc5, Satb1, Prkcb, Atxn7, Ehmt1, Dis3l2, Bub3, Nasp, Ing4, Hdac4, Mll5, Bat3, Whsc1l1, Morf4l1, Nat15, Epc1, Jmjd1c, Mysm1, Smchd1, Bptf, Hist3h2a, Myst3, Wac, Ep300, Tada3, Hcfc1, Rtf1, Brd4, Banp, Smc4, Stag2, L3mbtl3, Taf1, Eed, Ncoa3, Kdm5a, Mll3,
GO:0031325	positive regulation of ce	0.14286 ( 63 of 441 genes )	0.04593 ( 1562 of 34011 annotated genes )	1.013e-15	1.803e-12	Stat5b, Ino80, Creb1, Foxp1, Atxn7, Gnas, Ccnd2, Bcl11b, Hsp90aa1, Ppp1r12a, Tesc, Prkcd, Hdac4, Mll5, Supt4h1, Pecam1, Atg7, Epc1, Stk16, Aff1, Nfat5, Mysm1, Bptf, Stat6, Myst3, Med1, Vegfa, Sp100, Rictor, Slc30a9, Nfatc3, Wac, S1pr1, Ppm1a, Ppp3ca, Bclaf1, Tada3, Stub1, Ep300, Med13, Rtf1, Brd4, Cst3, Ilf3, Smad4, Ccpg1, Runx1, Sirt7, Dicer1, Taf1, Lck, Rel, Cdk5rap3, Ccl5, Naa15, Phip, Ptprc, …
GO:0010604	positive regulation of ma	0.14059 ( 62 of 441 genes )	0.04501 ( 1531 of 34011 annotated genes )	1.464e-15	2.605e-12	Stat5b, Ino80, Creb1, Foxp1, Atxn7, Gnas, Ccnd2, Bcl11b, Ppp1r12a, Tesc, Prkcd, Hdac4, Mll5, Supt4h1, Pecam1, Atg7, Epc1, Stk16, Aff1, Nfat5, Mysm1, Bptf, Stat6, Myst3, Med1, Vegfa, Sp100, Rictor, Slc30a9, Nfatc3, Wac, S1pr1, Ppm1a, Ppp3ca, Bclaf1, Tada3, Stub1, Ep300, Hcfc1, Med13, Rtf1, Brd4, Cst3, Ilf3, Smad4, Ccpg1, Runx1, Sirt7, Dicer1, Taf1, Lck, Rel, Cdk5rap3, Ccl5, Naa15, Phip, Ptprc, Aim…
GO:0016568	chromatin modification	0.07029 ( 31 of 441 genes )	0.01182 ( 402 of 34011 annotated genes )	2.257e-15	4.018e-12	Ino80, Wac, Satb1, Prkcb, Tada3, Ep300, Atxn7, Ehmt1, Hcfc1, Rtf1, Brd4, Banp, Nasp, Ing4, L3mbtl3, Hdac4, Mll5, Taf1, Bat3, Whsc1l1, Morf4l1, Nat15, Epc1, Jmjd1c, Mysm1, Ncoa3, Eed, Bptf, Myst3, Kdm5a, Mll3,
GO:0006810	transport	0.21542 ( 95 of 441 genes )	0.09306 ( 3165 of 34011 annotated genes )	3.922e-15	6.981e-12	Stat5b, Pitpna, Pram1, Exoc2, Prkcb, Ap3m1, Hsp90aa1, Rab13, Tesc, Ikbkb, Pecam1, Mfsd6, Atg7, Trim27, Uqcrh, Cog2, Copb1, Cd3g, Ppp3ca, Ap2b1, Sdccag1, Vps24, Rtn4, Smad4, Ubr5, Itpr1, Clip1, Slc6a6, Ccl5, Sec61a1, Ptprc, Nckap1l, Xpo7, Vdac3, Pi4k2a, Creb1, Erc1, Anxa6, Cox6c, Gnas, Rab18, Vps53, Rab21, Clic1, Cux1, Nasp, Sod1, Ppp1r12a, Prkcd, Stxbp2, Tnnc1, Actr2, Bat3, Pdpk1, Sh3kbp1, Rab11f…
GO:0051173	positive regulation of ni	0.11791 ( 52 of 441 genes )	0.03390 ( 1153 of 34011 annotated genes )	5.323e-15	9.476e-12	Stat5b, Ino80, Creb1, Foxp1, Atxn7, Gnas, Bcl11b, Hsp90aa1, Ppp1r12a, Tesc, Hdac4, Mll5, Supt4h1, Epc1, Stk16, Aff1, Nfat5, Mysm1, Bptf, Stat6, Myst3, Med1, Vegfa, Sp100, Slc30a9, Nfatc3, Wac, S1pr1, Ppm1a, Ppp3ca, Bclaf1, Tada3, Ep300, Med13, Rtf1, Brd4, Cst3, Ilf3, Smad4, Ccpg1, Runx1, Sirt7, Dicer1, Taf1, Cdk5rap3, Rel, Naa15, Phip, Ncoa3, Ptprc, Gabpb1, Kdm5a,
GO:0048523	negative regulation of ce	0.19048 ( 84 of 441 genes )	0.07706 ( 2621 of 34011 annotated genes )	6.088e-15	1.084e-11	Stat5b, Prkcb, Atxn7, Usp28, Nfkbid, Ehmt1, Bcl11b, Dis3l2, Bub3, Tesc, Tnrc6a, Mll5, Atg7, Trim27, Epc1, Stat6, Ubtf, Ppp3ca, Bclaf1, Foxn3, Pim1, Zbtb20, Rtn4, Ctla4, Dapk1, Ilf3, Smad4, Stag2, Runx1, Ccl5, Ptprc, Aimp2, Nckap1l, Klhl20, Rufy3, Rdbp, Creb1, Satb1, Foxp1, Iqgap1, Cflar, Ptpn22, Cux1, Sod1, Stk4, Ing4, Numb, Prkcd, Hdac4, Supt4h1, Cbl, Bat3, Obfc2a, Tes, Pdpk1, Add1, Bptf, Med1, …
GO:0009893	positive regulation of me	0.14512 ( 64 of 441 genes )	0.04934 ( 1678 of 34011 annotated genes )	7.922e-15	1.41e-11	Stat5b, Ino80, Creb1, Foxp1, Atxn7, Gnas, Ccnd2, Bcl11b, Hsp90aa1, Ppp1r12a, Tesc, Prkcd, Hdac4, Mll5, Supt4h1, Pecam1, Atg7, Epc1, Stk16, Aff1, Nfat5, Mysm1, Bptf, Stat6, Myst3, Med1, Vegfa, Sp100, Rictor, Slc30a9, Nfatc3, Wac, S1pr1, Ppm1a, Ppp3ca, Bclaf1, Tada3, Stub1, Ep300, Hcfc1, Med13, Rtf1, Brd4, Cst3, Ilf3, Smad4, Ccpg1, Runx1, Sirt7, Dicer1, Taf1, Lck, Rel, Cdk5rap3, Ccl5, Naa15, Phip, …
GO:0031328	positive regulation of ce	0.12018 ( 53 of 441 genes )	0.03558 ( 1210 of 34011 annotated genes )	9.267e-15	1.649e-11	Stat5b, Ino80, Creb1, Foxp1, Atxn7, Gnas, Bcl11b, Hsp90aa1, Ppp1r12a, Tesc, Prkcd, Hdac4, Mll5, Supt4h1, Epc1, Stk16, Aff1, Nfat5, Mysm1, Bptf, Stat6, Myst3, Med1, Vegfa, Sp100, Slc30a9, Nfatc3, Wac, S1pr1, Ppm1a, Ppp3ca, Bclaf1, Tada3, Ep300, Med13, Rtf1, Brd4, Cst3, Ilf3, Smad4, Ccpg1, Runx1, Sirt7, Dicer1, Taf1, Cdk5rap3, Ccl5, Rel, Naa15, Phip, Ncoa3, Gabpb1, Kdm5a,
GO:0045935	positive regulation of nu	0.11565 ( 51 of 441 genes )	0.03322 ( 1130 of 34011 annotated genes )	9.679e-15	1.723e-11	Stat5b, Ino80, Creb1, Foxp1, Atxn7, Gnas, Bcl11b, Ppp1r12a, Tesc, Hdac4, Mll5, Supt4h1, Epc1, Stk16, Aff1, Nfat5, Mysm1, Bptf, Stat6, Myst3, Med1, Vegfa, Sp100, Slc30a9, Nfatc3, Wac, S1pr1, Ppm1a, Ppp3ca, Bclaf1, Tada3, Ep300, Med13, Rtf1, Brd4, Cst3, Ilf3, Smad4, Ccpg1, Runx1, Sirt7, Dicer1, Taf1, Cdk5rap3, Rel, Naa15, Phip, Ncoa3, Ptprc, Gabpb1, Kdm5a,
GO:0044248	cellular catabolic proces	0.12925 ( 57 of 441 genes )	0.04055 ( 1379 of 34011 annotated genes )	9.787e-15	1.742e-11	Rhebl1, Ino80, Edem3, Psmb10, Zc3hav1, Psma4, Cul5, Ube2d3, Usp28, Uspl1, Gnas, Atg13, Rab21, Hsp90aa1, Rab13, Sod1, Nt5c, Hdac4, Tnnc1, Usp37, Bat3, Atg7, Usp24, Clpp, Rab14, Ddx3x, Usp7, Snx13, Rictor, Helb, Rabgap1, Wac, S1pr1, Usp48, Stub1, Atp2c1, Ttc3, Cst3, Rapgef2, Ubr5, Fbxo45, Smg7, Arih2, Atp6v1c1, Ncf2, Snx9, Taf1, Inpp4a, Lnpep, Pde4b, Tuba4a, Nckap1l, Cyld, Nub1, Tbc1d10c, Klhl20, U…
GO:0051254	positive regulation of RN	0.10884 ( 48 of 441 genes )	0.02984 ( 1015 of 34011 annotated genes )	1.115e-14	1.984e-11	Stat5b, Ino80, Creb1, Foxp1, Atxn7, Bcl11b, Ppp1r12a, Tesc, Hdac4, Mll5, Supt4h1, Epc1, Stk16, Aff1, Nfat5, Mysm1, Bptf, Stat6, Myst3, Med1, Vegfa, Sp100, Slc30a9, Nfatc3, Wac, Ppm1a, S1pr1, Ppp3ca, Bclaf1, Tada3, Ep300, Med13, Rtf1, Brd4, Ilf3, Ccpg1, Smad4, Runx1, Dicer1, Sirt7, Taf1, Cdk5rap3, Rel, Naa15, Phip, Ncoa3, Gabpb1, Kdm5a,
GO:0051234	establishment of localiza	0.21542 ( 95 of 441 genes )	0.09470 ( 3221 of 34011 annotated genes )	1.15e-14	2.047e-11	Stat5b, Pitpna, Pram1, Exoc2, Prkcb, Ap3m1, Hsp90aa1, Rab13, Tesc, Ikbkb, Pecam1, Mfsd6, Atg7, Trim27, Uqcrh, Cog2, Copb1, Cd3g, Ppp3ca, Ap2b1, Sdccag1, Vps24, Rtn4, Smad4, Ubr5, Itpr1, Clip1, Slc6a6, Ccl5, Sec61a1, Ptprc, Nckap1l, Xpo7, Vdac3, Pi4k2a, Creb1, Erc1, Anxa6, Cox6c, Gnas, Rab18, Vps53, Rab21, Clic1, Cux1, Nasp, Sod1, Ppp1r12a, Prkcd, Stxbp2, Tnnc1, Actr2, Bat3, Pdpk1, Sh3kbp1, Rab11f…
GO:0002376	immune system process	0.12472 ( 55 of 441 genes )	0.03822 ( 1300 of 34011 annotated genes )	1.164e-14	2.071e-11	Stat5b, Cd37, Pi4k2a, Psmb10, Cdk13, Zc3hav1, Pram1, Satb1, Prkcb, Clptm1, Foxp1, Nfkbid, Gnas, Bcl11b, Ptpn22, Hsp90aa1, Stk4, Sod1, Map3k5, Cd86, Tesc, Prkcd, Stxbp2, Mll5, Ikbkb, Bat3, Pecam1, Trim27, Il16, Pdpk1, Add1, Cnpy3, Stat6, Myst3, Med1, Il12rb1, Itk, Vegfa, Sp100, Tusc2, Ap3b1, Itpkb, Ctla4, Dusp10, Arih2, Runx1, Dicer1, Hspd1, Lck, Ccl5, Zap70, Meis1, Ptprc, Pde4b, Nckap1l,
GO:0006325	chromatin organization	0.07256 ( 32 of 441 genes )	0.01350 ( 459 of 34011 annotated genes )	1.337e-14	2.38e-11	Ino80, Satb1, Prkcb, Atxn7, Ehmt1, Nasp, Ing4, Hdac4, Mll5, Bat3, Whsc1l1, Morf4l1, Nat15, Epc1, Jmjd1c, Mysm1, Bptf, Hist3h2a, Myst3, Wac, Ep300, Tada3, Hcfc1, Brd4, Rtf1, Banp, L3mbtl3, Taf1, Eed, Ncoa3, Mll3, Kdm5a,
GO:0009891	positive regulation of bi	0.12018 ( 53 of 441 genes )	0.03640 ( 1238 of 34011 annotated genes )	2.318e-14	4.125e-11	Stat5b, Ino80, Creb1, Foxp1, Atxn7, Gnas, Bcl11b, Hsp90aa1, Ppp1r12a, Tesc, Prkcd, Hdac4, Mll5, Supt4h1, Epc1, Stk16, Aff1, Nfat5, Mysm1, Bptf, Stat6, Myst3, Med1, Vegfa, Sp100, Slc30a9, Nfatc3, Wac, S1pr1, Ppm1a, Ppp3ca, Bclaf1, Tada3, Ep300, Med13, Rtf1, Brd4, Cst3, Ilf3, Smad4, Ccpg1, Runx1, Sirt7, Dicer1, Taf1, Cdk5rap3, Ccl5, Rel, Naa15, Phip, Ncoa3, Gabpb1, Kdm5a,
GO:0016310	phosphorylation	0.13152 ( 58 of 441 genes )	0.04272 ( 1453 of 34011 annotated genes )	2.476e-14	4.407e-11	Pi4k2a, Map4k4, Csnk1a1, Cdk13, Creb1, Prkcb, Erc1, Atxn7, Iqgap1, Gnas, Ccnd2, Cdkl3, Ptpra, Tesk1, Stk4, Sod1, Map3k5, Prkcd, Ikbkb, Pecam1, Trim27, Pdpk1, Stk16, Sh3kbp1, Uqcrh, Il12rb1, Itk, Vegfa, Rictor, Cdkn1b, Zmynd8, Ibtk, Ep300, Pim1, Prkar1a, Ikbke, Itpkb, Wnk1, Dapk1, Brd4, Npr2, Smad4, Sik3, Dusp10, Trpm7, Pdk1, Mark3, Taf1, Ak3, Mast3, Pank2, Lck, Ccl5, Zap70, Phip, Ptprc, Nckap1l, …
GO:0009056	catabolic process	0.14059 ( 62 of 441 genes )	0.04828 ( 1642 of 34011 annotated genes )	3.451e-14	6.143e-11	Rhebl1, Ino80, Edem3, Psmb10, Zc3hav1, Psma4, Cul5, Ube2d3, Usp28, Uspl1, Gnas, Atg13, Rab21, Hsp90aa1, Rab13, Sod1, Psmc6, Nt5c, Hdac4, Tnnc1, Usp37, Bat3, Atg7, Usp24, Clpp, Rab14, Ddx3x, Usp7, Snx13, Rictor, Helb, Rabgap1, Wac, S1pr1, Usp48, Stub1, Atp2c1, Ttc3, Cst3, Smad4, Banp, Rapgef2, Ubr5, Smg7, Fbxo45, Arih2, Atp6v1c1, Snx9, Ncf2, Taf1, Inpp4b, Inpp4a, Lnpep, Pde4b, Tuba4a, Nckap1l, Cyl…
GO:0010628	positive regulation of ge	0.11111 ( 49 of 441 genes )	0.03202 ( 1089 of 34011 annotated genes )	3.789e-14	6.745e-11	Stat5b, Ino80, Creb1, Foxp1, Atxn7, Bcl11b, Ppp1r12a, Tesc, Hdac4, Mll5, Supt4h1, Epc1, Stk16, Aff1, Nfat5, Mysm1, Bptf, Stat6, Myst3, Med1, Vegfa, Sp100, Slc30a9, Nfatc3, Wac, Ppm1a, S1pr1, Ppp3ca, Tada3, Ep300, Hcfc1, Med13, Rtf1, Ilf3, Ccpg1, Smad4, Runx1, Dicer1, Sirt7, Taf1, Lck, Cdk5rap3, Ccl5, Rel, Naa15, Phip, Ncoa3, Gabpb1, Kdm5a,
GO:0018193	peptidyl-amino acid modif	0.07483 ( 33 of 441 genes )	0.01520 ( 517 of 34011 annotated genes )	6.197e-14	1.103e-10	Prkcb, Ehmt1, Stk4, Ing4, Prkcd, Hdac4, Bat3, Pecam1, Morf4l1, Epc1, Nat15, Pdpk1, Il12rb1, Myst3, Ttll4, Vegfa, Rictor, Ep300, Tada3, Hcfc1, P4ha1, Brd4, Fbxo11, Fkbp4, Taf1, Ccl5, Lck, Zap70, Phip, Ncoa3, Ptprc, Mll3, Galnt3,
GO:0045893	positive regulation of tr	0.10431 ( 46 of 441 genes )	0.02923 ( 994 of 34011 annotated genes )	9.007e-14	1.603e-10	Stat5b, Ino80, Creb1, Foxp1, Atxn7, Bcl11b, Ppp1r12a, Tesc, Hdac4, Mll5, Supt4h1, Epc1, Stk16, Aff1, Nfat5, Mysm1, Bptf, Stat6, Myst3, Med1, Vegfa, Sp100, Slc30a9, Nfatc3, Wac, Ppm1a, S1pr1, Ppp3ca, Tada3, Ep300, Med13, Rtf1, Ilf3, Ccpg1, Smad4, Runx1, Dicer1, Sirt7, Taf1, Cdk5rap3, Rel, Naa15, Phip, Ncoa3, Gabpb1, Kdm5a,
GO:0006468	protein phosphorylation	0.11338 ( 50 of 441 genes )	0.03487 ( 1186 of 34011 annotated genes )	2.389e-13	4.253e-10	Map4k4, Csnk1a1, Cdk13, Creb1, Prkcb, Erc1, Iqgap1, Gnas, Ccnd2, Cdkl3, Ptpra, Tesk1, Stk4, Sod1, Map3k5, Prkcd, Ikbkb, Pecam1, Trim27, Pdpk1, Stk16, Il12rb1, Itk, Vegfa, Rictor, Cdkn1b, Ibtk, Ep300, Pim1, Prkar1a, Ikbke, Wnk1, Dapk1, Brd4, Npr2, Smad4, Dusp10, Sik3, Trpm7, Pdk1, Mark3, Taf1, Mast3, Lck, Ccl5, Zap70, Phip, Ptprc, Nckap1l, Ccdc88c,
GO:0030163	protein catabolic process	0.06576 ( 29 of 441 genes )	0.01235 ( 420 of 34011 annotated genes )	3.053e-13	5.435e-10	Wac, Edem3, Psmb10, Psma4, Cul5, Usp48, Ube2d3, Stub1, Usp28, Uspl1, Ttc3, Smad4, Banp, Psmc6, Ubr5, Fbxo45, Arih2, Taf1, Usp37, Bat3, Atg7, Lnpep, Usp24, Clpp, Cyld, Nub1, Usp7, Klhl20, Usp9x,
GO:0051179	localization	0.23583 ( 104 of 441 genes )	0.11543 ( 3926 of 34011 annotated genes )	4.504e-13	8.018e-10	Stat5b, Pitpna, Pram1, Exoc2, Prkcb, Ap3m1, Hsp90aa1, Bub3, Rab13, Tesc, Tnrc6a, Ikbkb, Pecam1, Mfsd6, Atg7, Trim27, Uqcrh, Cog2, Copb1, Cd3g, Ppp3ca, Ap2b1, Sdccag1, Vps24, Rtn4, Smad4, Banp, Ubr5, Itpr1, Clip1, Slc6a6, Ccl5, Sec61a1, Ptprc, Pde4b, Nckap1l, Xpo7, Vdac3, Pi4k2a, Creb1, Erc1, Anxa6, Cox6c, Als2cl, Gnas, Rab18, Vps53, Rab21, Clic1, Cux1, Nasp, Sod1, Ppp1r12a, Prkcd, Stxbp2, Tnnc1, …
GO:0002520	immune system development	0.07710 ( 34 of 441 genes )	0.01744 ( 593 of 34011 annotated genes )	5.39e-13	9.593e-10	Stat5b, Cdk13, Satb1, Clptm1, Foxp1, Nfkbid, Gnas, Bcl11b, Ptpn22, Hsp90aa1, Stk4, Cd86, Tesc, Mll5, Add1, Stat6, Med1, Myst3, Itk, Vegfa, Tusc2, Ap3b1, Itpkb, Ctla4, Arih2, Runx1, Dicer1, Hspd1, Ccl5, Lck, Zap70, Meis1, Ptprc, Nckap1l,
GO:0016570	histone modification	0.05215 ( 23 of 441 genes )	0.00794 ( 270 of 34011 annotated genes )	1.262e-12	2.247e-09	Wac, Satb1, Prkcb, Tada3, Ep300, Atxn7, Ehmt1, Hcfc1, Rtf1, Brd4, Ing4, Hdac4, Mll5, Taf1, Whsc1l1, Morf4l1, Epc1, Nat15, Mysm1, Eed, Ncoa3, Myst3, Mll3,
GO:0035556	intracellular signal tran	0.13379 ( 59 of 441 genes )	0.04837 ( 1645 of 34011 annotated genes )	1.325e-12	2.359e-09	Stat5b, Rhebl1, Map4k4, Zc3hav1, Prkcb, Tulp4, Erc1, Usp28, Nfkbid, Rab18, Gnas, Als2cl, Rab21, Rab13, Stk4, Sod1, Prex1, Map3k5, Ing4, Prkcd, Hdac4, Ikbkb, Cbl, Bat3, Pecam1, Pdpk1, Nfat5, Rab14, Med1, Itk, Vegfa, Sp100, Rictor, Pja2, Rabgap1, S1pr1, Ppm1a, Ppp3ca, Atp2c1, Ep300, Ikbke, Itpkb, Wnk1, Dapk1, Npr2, Rabif, Gapvd1, Dusp10, Rapgef2, Itpr1, Pdk1, Lck, Rel, Ccl5, Zap70, Ptprc, Nckap1l, …
GO:0006357	regulation of transcripti	0.10884 ( 48 of 441 genes )	0.03419 ( 1163 of 34011 annotated genes )	1.597e-12	2.843e-09	Stat5b, Rdbp, Ino80, Cdk13, Creb1, Satb1, Prkcb, Foxp1, Atxn7, Ehmt1, Gnas, Bcl11b, Cux1, Ppp1r12a, Hdac4, Supt4h1, Brwd1, Trim27, Epc1, Stk16, Nfat5, Bptf, Stat6, Med1, Vegfa, Tcf25, Sp100, Slc30a9, Nfatc3, S1pr1, Ppp3ca, Ep300, Foxn3, Zbtb20, Med13, Rtf1, Brd4, Smad4, Ccpg1, Runx1, Dicer1, Taf1, Cdk5rap3, Phip, Meis1, Lcor, Ncoa3, Gabpb1,
GO:0033036	macromolecule localizatio	0.12698 ( 56 of 441 genes )	0.04475 ( 1522 of 34011 annotated genes )	1.936e-12	3.446e-09	Stat5b, Pitpna, Exoc2, Ap3m1, Erc1, Rab18, Als2cl, Vps53, Rab21, Hsp90aa1, Bub3, Rab13, Nasp, Tesc, Stxbp2, Tnrc6a, Bat3, Atg7, Trim27, Pdpk1, Rab11fip1, Rab14, Snx27, Med1, Cog2, Ranbp2, Snx13, Copb1, Dnm2, Cd3g, Snap29, Ppp3ca, Ap3b1, Syne1, Ap2b1, Ep300, Vps24, Rabif, Gapvd1, Banp, Smad4, Dnajc1, Ubr5, Rdx, Snx9, Fkbp4, Cep57, Atp8b2, Hnrnpa2b1, Phip, Stam2, Sec61a1, Zfyve16, Xpo7, Hnrnpa3, Cy…
GO:0016569	covalent chromatin modifi	0.05215 ( 23 of 441 genes )	0.00812 ( 276 of 34011 annotated genes )	1.993e-12	3.547e-09	Wac, Satb1, Prkcb, Tada3, Ep300, Atxn7, Ehmt1, Hcfc1, Rtf1, Brd4, Ing4, Hdac4, Mll5, Taf1, Whsc1l1, Morf4l1, Epc1, Nat15, Mysm1, Eed, Ncoa3, Myst3, Mll3,
GO:0030097	hemopoiesis	0.07029 ( 31 of 441 genes )	0.01529 ( 520 of 34011 annotated genes )	2.168e-12	3.86e-09	Stat5b, Tusc2, Cdk13, Ap3b1, Satb1, Clptm1, Foxp1, Nfkbid, Gnas, Itpkb, Bcl11b, Ctla4, Ptpn22, Hsp90aa1, Stk4, Arih2, Tesc, Runx1, Mll5, Lck, Ccl5, Zap70, Meis1, Ptprc, Add1, Nckap1l, Stat6, Med1, Myst3, Itk, Vegfa,
GO:0010557	positive regulation of ma	0.10658 ( 47 of 441 genes )	0.03325 ( 1131 of 34011 annotated genes )	2.188e-12	3.896e-09	Stat5b, Ino80, Creb1, Foxp1, Atxn7, Bcl11b, Ppp1r12a, Tesc, Hdac4, Mll5, Supt4h1, Epc1, Stk16, Aff1, Nfat5, Mysm1, Bptf, Stat6, Myst3, Med1, Vegfa, Sp100, Slc30a9, Nfatc3, Wac, Ppm1a, S1pr1, Ppp3ca, Tada3, Ep300, Med13, Rtf1, Cst3, Ilf3, Ccpg1, Smad4, Runx1, Dicer1, Sirt7, Taf1, Cdk5rap3, Rel, Naa15, Phip, Ncoa3, Gabpb1, Kdm5a,
GO:0002521	leukocyte differentiation	0.05669 ( 25 of 441 genes )	0.00985 ( 335 of 34011 annotated genes )	2.507e-12	4.462e-09	Stat5b, Tusc2, Ap3b1, Satb1, Clptm1, Foxp1, Nfkbid, Gnas, Itpkb, Bcl11b, Ctla4, Ptpn22, Hsp90aa1, Tesc, Runx1, Mll5, Lck, Ccl5, Zap70, Ptprc, Nckap1l, Med1, Stat6, Itk, Vegfa,
GO:0048534	hemopoietic or lymphoid o	0.07256 ( 32 of 441 genes )	0.01647 ( 560 of 34011 annotated genes )	2.907e-12	5.175e-09	Stat5b, Tusc2, Cdk13, Ap3b1, Satb1, Clptm1, Foxp1, Nfkbid, Gnas, Itpkb, Bcl11b, Ctla4, Ptpn22, Hsp90aa1, Stk4, Arih2, Tesc, Runx1, Dicer1, Mll5, Lck, Ccl5, Zap70, Meis1, Ptprc, Add1, Nckap1l, Stat6, Med1, Myst3, Itk, Vegfa,
GO:0008104	protein localization	0.11565 ( 51 of 441 genes )	0.03893 ( 1324 of 34011 annotated genes )	3.939e-12	7.012e-09	Exoc2, Ap3m1, Erc1, Rab18, Als2cl, Vps53, Rab21, Hsp90aa1, Bub3, Rab13, Nasp, Tesc, Stxbp2, Tnrc6a, Bat3, Atg7, Trim27, Pdpk1, Rab11fip1, Rab14, Snx27, Med1, Cog2, Ranbp2, Snx13, Copb1, Dnm2, Cd3g, Ppp3ca, Snap29, Ap3b1, Syne1, Ap2b1, Ep300, Vps24, Rabif, Gapvd1, Banp, Smad4, Dnajc1, Ubr5, Rdx, Snx9, Fkbp4, Cep57, Phip, Stam2, Sec61a1, Zfyve16, Xpo7, Cyld,
GO:0065009	regulation of molecular f	0.13832 ( 61 of 441 genes )	0.05272 ( 1793 of 34011 annotated genes )	4.838e-12	8.611e-09	Rhebl1, Zc3hav1, Ranbp10, Prkcb, Foxp1, Nfkbid, Iqgap1, Gnas, Ccnd2, Cflar, Stk4, Sod1, Ppp1r12a, Map3k5, Tesc, Prkcd, Hdac4, Tnnc1, Ikbkb, Crtc3, Trim27, Pdpk1, Add1, Med1, Fdx1, Itk, Vegfa, Usp7, Snx13, Sp100, Rictor, Dennd1b, Rabgap1, S1pr1, Cdkn1b, Ppp6r3, Ibtk, Ep300, Foxn3, Pim1, Prkar1a, Wnk1, Dapk1, Cst3, Brd4, Gapvd1, Smad4, Dusp10, Rapgef2, Snx9, Rqcd1, Hspd1, Lck, Ccl5, Oaz1, Ncoa3, Pt…
GO:0006366	transcription from RNA po	0.10884 ( 48 of 441 genes )	0.03558 ( 1210 of 34011 annotated genes )	6.442e-12	1.147e-08	Stat5b, Rdbp, Ino80, Cdk13, Creb1, Satb1, Prkcb, Foxp1, Atxn7, Ehmt1, Gnas, Bcl11b, Cux1, Ppp1r12a, Hdac4, Supt4h1, Brwd1, Trim27, Epc1, Stk16, Nfat5, Bptf, Stat6, Med1, Vegfa, Tcf25, Sp100, Slc30a9, Nfatc3, S1pr1, Ppp3ca, Ep300, Foxn3, Zbtb20, Med13, Rtf1, Brd4, Smad4, Ccpg1, Runx1, Dicer1, Taf1, Cdk5rap3, Phip, Meis1, Lcor, Ncoa3, Gabpb1,
GO:0051603	proteolysis involved in c	0.05442 ( 24 of 441 genes )	0.00950 ( 323 of 34011 annotated genes )	7.584e-12	1.35e-08	Wac, Edem3, Psmb10, Psma4, Cul5, Usp48, Ube2d3, Stub1, Usp28, Uspl1, Ttc3, Fbxo45, Ubr5, Arih2, Taf1, Bat3, Usp37, Clpp, Usp24, Cyld, Nub1, Usp7, Klhl20, Usp9x,
GO:0009057	macromolecule catabolic p	0.07256 ( 32 of 441 genes )	0.01723 ( 586 of 34011 annotated genes )	9.533e-12	1.697e-08	Wac, Edem3, Psmb10, Psma4, Cul5, Usp48, Ube2d3, Stub1, Usp28, Uspl1, Ttc3, Cst3, Smad4, Banp, Sod1, Psmc6, Ubr5, Fbxo45, Smg7, Arih2, Taf1, Usp37, Bat3, Atg7, Lnpep, Usp24, Clpp, Cyld, Nub1, Usp7, Klhl20, Usp9x,
GO:0044257	cellular protein cataboli	0.05442 ( 24 of 441 genes )	0.00976 ( 332 of 34011 annotated genes )	1.352e-11	2.406e-08	Wac, Edem3, Psmb10, Psma4, Cul5, Usp48, Ube2d3, Stub1, Usp28, Uspl1, Ttc3, Fbxo45, Ubr5, Arih2, Taf1, Bat3, Usp37, Clpp, Usp24, Cyld, Nub1, Usp7, Klhl20, Usp9x,
GO:0045321	leukocyte activation	0.06803 ( 30 of 441 genes )	0.01549 ( 527 of 34011 annotated genes )	1.561e-11	2.778e-08	Stat5b, Pi4k2a, Tusc2, Psmb10, Pram1, Ap3b1, Satb1, Prkcb, Clptm1, Foxp1, Nfkbid, Itpkb, Bcl11b, Ctla4, Ptpn22, Hsp90aa1, Cd86, Prkcd, Stxbp2, Mll5, Hspd1, Lck, Ccl5, Zap70, Pdpk1, Ptprc, Nckap1l, Stat6, Il12rb1, Itk,
GO:0002682	regulation of immune syst	0.07710 ( 34 of 441 genes )	0.01982 ( 674 of 34011 annotated genes )	1.822e-11	3.243e-08	Stat5b, Cd37, Zc3hav1, Pram1, Prkcb, Clptm1, Foxp1, Nfkbid, Gnas, Ptpn22, Hsp90aa1, Cd86, Tesc, Stxbp2, Mll5, Pecam1, Trim27, Pdpk1, Stat6, Il12rb1, Med1, Itk, Vegfa, Ap3b1, Itpkb, Ctla4, Dusp10, Runx1, Hspd1, Ccl5, Lck, Zap70, Ptprc, Nckap1l,
GO:0006511	ubiquitin-dependent prote	0.04989 ( 22 of 441 genes )	0.00835 ( 284 of 34011 annotated genes )	2.547e-11	4.533e-08	Wac, Edem3, Psma4, Cul5, Usp48, Ube2d3, Stub1, Usp28, Uspl1, Ttc3, Fbxo45, Ubr5, Arih2, Taf1, Bat3, Usp37, Usp24, Cyld, Nub1, Klhl20, Usp7, Usp9x,
GO:0034622	cellular macromolecular c	0.06122 ( 27 of 441 genes )	0.01300 ( 442 of 34011 annotated genes )	3.416e-11	6.08e-08	Ppm1a, Cdkn1b, Pum2, Creb1, Ap2b1, Mbnl1, Stub1, Ep300, Celf2, Hsp90aa1, Smad4, Clip1, Prex1, Rdx, Prkcd, Snx9, Dicer1, Fkbp4, Prpf31, Ccl5, Nat15, Rbm5, Add1, Tuba4a, Nckap1l, Hist3h2a, Rictor,
GO:0019941	modification-dependent pr	0.04989 ( 22 of 441 genes )	0.00853 ( 290 of 34011 annotated genes )	3.826e-11	6.81e-08	Wac, Edem3, Psma4, Cul5, Usp48, Ube2d3, Stub1, Usp28, Uspl1, Ttc3, Fbxo45, Ubr5, Arih2, Taf1, Bat3, Usp37, Usp24, Cyld, Nub1, Klhl20, Usp7, Usp9x,
GO:0048583	regulation of response to	0.13832 ( 61 of 441 genes )	0.05548 ( 1887 of 34011 annotated genes )	3.907e-11	6.955e-08	Stat5b, Cd37, Map4k4, Zc3hav1, Pram1, Prkcb, Atxn7, Tctn1, Nfkbid, Als2cl, Ptpn22, Stk4, Sod1, Prex1, Map3k5, Cd86, Prkcd, Numb, Stxbp2, Ikbkb, Cbl, Pecam1, Atg7, Trim27, Il16, Pdpk1, Nfat5, Stat6, Med1, Il12rb1, Itk, Vegfa, Snx13, Rictor, Pja2, Rabgap1, Wac, S1pr1, Ppm1a, Atp2c1, Ep300, Itpkb, Rtn4, Dapk1, Ctla4, Gapvd1, Smad4, Dusp10, Rapgef2, Ubr5, Runx1, Myof, Hspd1, Lck, Ccl5, Zap70, Ptprc, …
GO:0034621	cellular macromolecular c	0.06576 ( 29 of 441 genes )	0.01508 ( 513 of 34011 annotated genes )	4.055e-11	7.218e-08	Ppm1a, Cdkn1b, Pum2, Creb1, Ap2b1, Mbnl1, Stub1, Ep300, Celf2, Hsp90aa1, Smad4, Smc4, Nasp, Clip1, Prex1, Rdx, Prkcd, Snx9, Dicer1, Fkbp4, Prpf31, Ccl5, Nat15, Rbm5, Add1, Tuba4a, Nckap1l, Hist3h2a, Rictor,
GO:0045184	establishment of protein	0.09751 ( 43 of 441 genes )	0.03111 ( 1058 of 34011 annotated genes )	4.087e-11	7.275e-08	Exoc2, Ap3m1, Erc1, Rab18, Vps53, Rab21, Hsp90aa1, Rab13, Nasp, Tesc, Stxbp2, Atg7, Trim27, Pdpk1, Rab11fip1, Rab14, Snx27, Med1, Cog2, Ranbp2, Snx13, Copb1, Dnm2, Cd3g, Ppp3ca, Snap29, Ap3b1, Ap2b1, Ep300, Vps24, Rabif, Gapvd1, Smad4, Dnajc1, Ubr5, Snx9, Cep57, Phip, Stam2, Sec61a1, Zfyve16, Xpo7, Cyld,
GO:0015031	protein transport	0.09524 ( 42 of 441 genes )	0.02993 ( 1018 of 34011 annotated genes )	4.397e-11	7.826e-08	Exoc2, Ap3m1, Erc1, Rab18, Vps53, Rab21, Hsp90aa1, Rab13, Nasp, Tesc, Stxbp2, Atg7, Trim27, Rab11fip1, Rab14, Snx27, Med1, Cog2, Ranbp2, Snx13, Copb1, Dnm2, Cd3g, Ppp3ca, Snap29, Ap3b1, Ap2b1, Ep300, Vps24, Rabif, Gapvd1, Smad4, Dnajc1, Ubr5, Snx9, Cep57, Phip, Stam2, Sec61a1, Zfyve16, Xpo7, Cyld,
GO:0043632	modification-dependent ma	0.04989 ( 22 of 441 genes )	0.00861 ( 293 of 34011 annotated genes )	4.671e-11	8.315e-08	Wac, Edem3, Psma4, Cul5, Usp48, Ube2d3, Stub1, Usp28, Uspl1, Ttc3, Fbxo45, Ubr5, Arih2, Taf1, Bat3, Usp37, Usp24, Cyld, Nub1, Klhl20, Usp7, Usp9x,
GO:0050896	response to stimulus	0.33333 ( 147 of 441 genes )	0.20335 ( 6916 of 34011 annotated genes )	5.331e-11	9.49e-08	Stat5b, Rhebl1, Ino80, Csnk1a1, Zc3hav1, Prkcb, Nfkbid, Bcl11b, Atg13, Hsp90aa1, Rab13, Map3k5, Tnrc6a, Atg7, Il12rb1, Itk, Pja2, Rabgap1, Bclaf1, Stub1, Rtn4, Ubr5, Itpr1, Fbxo45, Ccl5, Ptprc, Vdac3, Ccdc88c, Edem3, Map4k4, Creb1, Erc1, Foxp1, Zc3h15, Tctn1, Add3, Als2cl, Gnas, Rab21, Ptpn22, Sod1, Ing4, Prkcd, Numb, Hdac4, Tnnc1, Cbl, Bat3, Morf4l1, Obfc2a, Il16, Nfat5, Add1, Snx27, Rev3l, Vegf…
GO:0070647	protein modification by s	0.06122 ( 27 of 441 genes )	0.01332 ( 453 of 34011 annotated genes )	5.945e-11	1.058e-07	Wac, Ube2d3, Stub1, Atxn7, Cdc27, Usp28, Ttc3, Fbxo45, Ubr5, Arih2, Hdac4, Cbl, Cdc16, Usp37, Atg7, Trim27, Mysm1, Aimp2, Cops6, Ube2j1, Cyld, Ranbp2, Nub1, Usp7, Klhl20, Usp9x, Pja2,
GO:0032268	regulation of cellular pr	0.09751 ( 43 of 441 genes )	0.03178 ( 1081 of 34011 annotated genes )	8.026e-11	1.429e-07	Eif4e2, Pum2, Pum1, Iqgap1, Gnas, Ccnd2, Stk4, Sod1, Tnrc6b, Map3k5, Prkcd, Hdac4, Tnrc6a, Bat3, Pecam1, Atg7, Trim27, Eif5b, Pdpk1, Vegfa, Rictor, Mif4gd, Wac, Cdkn1b, Ibtk, Ep300, Stub1, Pim1, Prkar1a, Wnk1, Rtf1, Dusp10, Smad4, Dnajc1, Taf1, Lck, Ccl5, Phip, Aimp2, Ptprc, Nckap1l, Nub1, Ccdc88c,
GO:0051716	cellular response to stim	0.28345 ( 125 of 441 genes )	0.16486 ( 5607 of 34011 annotated genes )	1.509e-10	2.685e-07	Stat5b, Rhebl1, Ino80, Csnk1a1, Zc3hav1, Pram1, Prkcb, Tulp4, Atxn7, Usp28, Nfkbid, Atg13, Rab13, Map3k5, Tesc, Tnrc6a, Mll5, Ikbkb, Pecam1, Atg7, Stat6, Il12rb1, Itk, Usp7, Pja2, Rabgap1, Nfatc3, Cd3g, Ppp3ca, Bclaf1, Stub1, Prkar1a, Med13, Rtn4, Ctla4, Dapk1, Smad4, Smc4, Ubr5, Pdk1, Itpr1, Fbxo45, Runx1, Ncf2, Ccl5, Ptprc, Pde4b, Nckap1l, Ccdc88c, Apbb1ip, Arhgap19, Smc5, Map4k4, Creb1, Parp2,…
GO:0032502	developmental process	0.22222 ( 98 of 441 genes )	0.11705 ( 3981 of 34011 annotated genes )	1.677e-10	2.986e-07	Stat5b, Psmb10, Csnk1a1, Cdk13, Prkcb, Clptm1, Fam48a, Nfkbid, Ehmt1, Bcl11b, Hsp90aa1, Tesc, Mll5, Atg7, Epc1, Rnf17, Flii, Stat6, Itk, Usp7, Vezf1, Nfatc3, Ppp3ca, Mbnl1, Foxn3, Prkar1a, Rtn4, Msi2, Ctla4, Brd4, Smad4, Banp, Stag2, Itpr1, Fbxo45, Runx1, Ccl5, Ptprc, Aimp2, Nckap1l, Reck, Kdm5a, Rufy3, Smc5, Creb1, Satb1, Foxp1, Tctn1, Gnas, Rab18, Clic1, Ptpn22, Ptpra, Cux1, Nasp, Stk4, Sod1, C…
GO:0044265	cellular macromolecule ca	0.05896 ( 26 of 441 genes )	0.01305 ( 444 of 34011 annotated genes )	1.985e-10	3.533e-07	Wac, Edem3, Psmb10, Psma4, Cul5, Usp48, Ube2d3, Stub1, Usp28, Uspl1, Ttc3, Sod1, Fbxo45, Smg7, Ubr5, Arih2, Taf1, Bat3, Usp37, Clpp, Usp24, Cyld, Nub1, Usp7, Klhl20, Usp9x,
GO:0044085	cellular component biogen	0.11338 ( 50 of 441 genes )	0.04243 ( 1443 of 34011 annotated genes )	2.66e-10	4.735e-07	Rrp36, Ino80, Rps24, Pum2, Creb1, Foxp1, Atg13, Celf2, Hsp90aa1, Prex1, Prkcd, Rpl7, Bat3, Rps7, Crtc3, Trim27, Nat15, Clpp, Pdpk1, Rps8, Uqcrh, Add1, Hist3h2a, Vegfa, Rictor, S1pr1, Cdkn1b, Ppm1a, Rpf1, Ap2b1, Mbnl1, Bclaf1, Stub1, Ep300, Hcfc1, Smad4, Bysl, Clip1, Rdx, Snx9, Dicer1, Ak3, Fkbp4, Cep57, Ccl5, Prpf31, Rbm5, Tuba4a, Nckap1l, Ccdc88c,
GO:0001775	cell activation	0.06803 ( 30 of 441 genes )	0.01755 ( 597 of 34011 annotated genes )	3.192e-10	5.681e-07	Stat5b, Pi4k2a, Tusc2, Psmb10, Pram1, Ap3b1, Satb1, Prkcb, Clptm1, Foxp1, Nfkbid, Itpkb, Bcl11b, Ctla4, Ptpn22, Hsp90aa1, Cd86, Prkcd, Stxbp2, Mll5, Hspd1, Lck, Ccl5, Zap70, Pdpk1, Ptprc, Nckap1l, Stat6, Il12rb1, Itk,
GO:0043933	macromolecular complex su	0.08844 ( 39 of 441 genes )	0.02828 ( 962 of 34011 annotated genes )	3.733e-10	6.645e-07	Pum2, Creb1, Celf2, Hsp90aa1, Nasp, Prex1, Prkcd, Crtc3, Trim27, Nat15, Clpp, Uqcrh, Add1, Hist3h2a, Vegfa, Rictor, Cdkn1b, Ppm1a, Ap2b1, Mbnl1, Bclaf1, Ep300, Stub1, Hcfc1, Smad4, Smc4, Clip1, Rdx, Snx9, Dicer1, Fkbp4, Ak3, Cep57, Ccl5, Prpf31, Rbm5, Tuba4a, Nckap1l, Ccdc88c,
GO:0065003	macromolecular complex as	0.08390 ( 37 of 441 genes )	0.02582 ( 878 of 34011 annotated genes )	3.752e-10	6.679e-07	Pum2, Creb1, Celf2, Hsp90aa1, Prex1, Prkcd, Crtc3, Trim27, Nat15, Clpp, Uqcrh, Add1, Hist3h2a, Vegfa, Rictor, Cdkn1b, Ppm1a, Ap2b1, Mbnl1, Bclaf1, Ep300, Stub1, Hcfc1, Smad4, Clip1, Rdx, Snx9, Dicer1, Fkbp4, Ak3, Cep57, Ccl5, Prpf31, Rbm5, Nckap1l, Tuba4a, Ccdc88c,
GO:0042110	T cell activation	0.04762 ( 21 of 441 genes )	0.00885 ( 301 of 34011 annotated genes )	4.976e-10	8.857e-07	Stat5b, Psmb10, Ap3b1, Satb1, Clptm1, Nfkbid, Itpkb, Bcl11b, Ctla4, Ptpn22, Hsp90aa1, Cd86, Hspd1, Lck, Ccl5, Zap70, Ptprc, Nckap1l, Stat6, Il12rb1, Itk,
GO:0051246	regulation of protein met	0.09977 ( 44 of 441 genes )	0.03508 ( 1193 of 34011 annotated genes )	5.127e-10	9.126e-07	Eif4e2, Pum2, Pum1, Iqgap1, Gnas, Ccnd2, Stk4, Sod1, Tnrc6b, Map3k5, Prkcd, Hdac4, Tnrc6a, Bat3, Pecam1, Atg7, Trim27, Eif5b, Pdpk1, Vegfa, Rictor, Mif4gd, Wac, Cdkn1b, Ibtk, Ep300, Stub1, Pim1, Prkar1a, Wnk1, Rtf1, Banp, Dusp10, Smad4, Dnajc1, Taf1, Lck, Ccl5, Phip, Aimp2, Ptprc, Nckap1l, Nub1, Ccdc88c,
GO:0050793	regulation of development	0.10658 ( 47 of 441 genes )	0.03931 ( 1337 of 34011 annotated genes )	6.025e-10	1.072e-06	Stat5b, Creb1, Prkcb, Clptm1, Foxp1, Nfkbid, Gnas, Bcl11b, Ptpra, Hsp90aa1, Clic1, Prex1, Cd86, Tesc, Numb, Hdac4, Mll5, Epc1, Add1, Stat6, Myst3, Med1, Vegfa, Cdkn1b, Ap3b1, Syne1, Ep300, Itpkb, Ttc3, Ctla4, Rtn4, Rtf1, Smad4, Dusp10, Stag2, Runx1, Dicer1, Lck, Ccl5, Zap70, Phip, Meis1, Ncoa3, Ptprc, Nckap1l, Gtf2i, Rufy3,
GO:0030217	T cell differentiation	0.03628 ( 16 of 441 genes )	0.00491 ( 167 of 34011 annotated genes )	6.162e-10	1.097e-06	Stat5b, Ap3b1, Satb1, Clptm1, Nfkbid, Bcl11b, Itpkb, Ctla4, Hsp90aa1, Ptpn22, Lck, Zap70, Ptprc, Nckap1l, Stat6, Itk,
GO:0007049	cell cycle	0.09524 ( 42 of 441 genes )	0.03281 ( 1116 of 34011 annotated genes )	7.163e-10	1.275e-06	Stat5b, Ino80, Smc5, Csnk1a1, Cdc27, Usp28, Ccnd2, Dis3l2, Bub3, Nasp, Ppp1r12a, Ing4, Prkcd, Mll5, Actr2, Usp37, Bat3, Obfc2a, Pggt1b, Med1, Rabgap1, Wac, Cdkn1b, Ppp3ca, Foxn3, Vps24, Pim1, Hcfc1, Brd4, Ccpg1, Banp, Smc4, Stag2, Tbrg1, Dicer1, Sirt7, Taf1, Cdc16, Ptprc, Gigyf2, Cyld, Usp9x,
GO:0018205	peptidyl-lysine modificat	0.03401 ( 15 of 441 genes )	0.00426 ( 145 of 34011 annotated genes )	7.258e-10	1.292e-06	Ing4, Hdac4, Taf1, Bat3, Morf4l1, Tada3, Nat15, Epc1, Ep300, Ehmt1, Ncoa3, Hcfc1, Brd4, Myst3, Mll3,
GO:0045595	regulation of cell differ	0.08844 ( 39 of 441 genes )	0.02896 ( 985 of 34011 annotated genes )	7.297e-10	1.299e-06	Stat5b, Creb1, Clptm1, Nfkbid, Gnas, Bcl11b, Ptpra, Hsp90aa1, Clic1, Prex1, Tesc, Numb, Hdac4, Mll5, Epc1, Myst3, Med1, Vegfa, Ap3b1, Syne1, Ep300, Itpkb, Ttc3, Ctla4, Rtn4, Rtf1, Dusp10, Smad4, Stag2, Runx1, Dicer1, Lck, Ccl5, Zap70, Meis1, Ncoa3, Ptprc, Nckap1l, Rufy3,
GO:0008283	cell proliferation	0.10431 ( 46 of 441 genes )	0.03846 ( 1308 of 34011 annotated genes )	9.187e-10	1.635e-06	Stat5b, Psmb10, Satb1, Foxp1, Usp28, Bcl11b, Ccnd2, Ptpn22, Dis3l2, Nasp, Stk4, Cd86, Ing4, Naa35, Tesc, Prkcd, Numb, Hdac4, Morf4l1, Tes, Nat15, Pggt1b, Stat6, Med1, Il12rb1, Vegfa, Rictor, Cdkn1b, S1pr1, Pim1, Prkar1a, Ctla4, Cst3, Brd4, Smad4, Tbrg1, Arih2, Runx1, Dicer1, Hspd1, Ccl5, Zap70, Phip, Aimp2, Ptprc, Nckap1l,
GO:0007010	cytoskeleton organization	0.07256 ( 32 of 441 genes )	0.02073 ( 705 of 34011 annotated genes )	1.011e-09	1.8e-06	Ino80, S1pr1, Cdkn1b, Syne1, Ranbp10, Foxp1, Ep300, Atxn7, Atp2c1, Bub3, Trpm7, Arfip2, Sod1, Prex1, Cep68, Clip1, Ppp1r12a, Rdx, Prkcd, Actr2, Dicer1, Fkbp4, Brwd1, Cep57, Sh3kbp1, Phip, Flii, Add1, Nckap1l, Cyld, Ccdc88c, Rictor,
GO:0051239	regulation of multicellul	0.12698 ( 56 of 441 genes )	0.05281 ( 1796 of 34011 annotated genes )	1.015e-09	1.806e-06	Stat5b, Zc3hav1, Creb1, Prkcb, Clptm1, Foxp1, Anxa6, Nfkbid, Iqgap1, Gnas, Bcl11b, Ptpra, Hsp90aa1, Clic1, Sod1, Prex1, Cd86, Tesc, Prkcd, Numb, Hdac4, Tnnc1, Mll5, Trim27, Add1, Stat6, Med1, Il12rb1, Vegfa, Cdkn1b, Ppp3ca, Ap3b1, Syne1, Ep300, Itpkb, Wnk1, Ttc3, Rtn4, Ctla4, Smad4, Dusp10, Rapgef2, Runx1, Dicer1, Hspd1, Lnpep, Lck, Rel, Ccl5, Zap70, Meis1, Ncoa3, Ptprc, Nckap1l, Gtf2i, Rufy3,
GO:0046649	lymphocyte activation	0.05669 ( 25 of 441 genes )	0.01308 ( 445 of 34011 annotated genes )	1.046e-09	1.862e-06	Stat5b, Tusc2, Psmb10, Ap3b1, Satb1, Prkcb, Clptm1, Foxp1, Nfkbid, Itpkb, Bcl11b, Ctla4, Ptpn22, Hsp90aa1, Cd86, Prkcd, Hspd1, Lck, Ccl5, Zap70, Ptprc, Nckap1l, Stat6, Il12rb1, Itk,
GO:0051649	establishment of localiza	0.10431 ( 46 of 441 genes )	0.03878 ( 1319 of 34011 annotated genes )	1.196e-09	2.128e-06	Pi4k2a, Pram1, Exoc2, Creb1, Prkcb, Ap3m1, Erc1, Hsp90aa1, Cux1, Rab13, Sod1, Ppp1r12a, Tesc, Stxbp2, Tnnc1, Actr2, Trim27, Pdpk1, Rab14, Snx27, Med1, Cog2, Ranbp2, Snx13, Copb1, Ppp3ca, Ap3b1, Ap2b1, Syne1, Atp2c1, Ep300, Sdccag1, Vps24, Rtn4, Smad4, Dnajc1, Tbrg1, Ubr5, Snx9, Cep57, Ccl5, Phip, Stam2, Zfyve16, Xpo7, Cyld,
GO:0046907	intracellular transport	0.07710 ( 34 of 441 genes )	0.02337 ( 795 of 34011 annotated genes )	1.373e-09	2.445e-06	Ap3m1, Erc1, Hsp90aa1, Cux1, Rab13, Sod1, Ppp1r12a, Tesc, Tnnc1, Actr2, Rab14, Snx27, Med1, Cog2, Ranbp2, Snx13, Copb1, Ppp3ca, Ap2b1, Ap3b1, Atp2c1, Ep300, Sdccag1, Vps24, Smad4, Tbrg1, Ubr5, Snx9, Cep57, Phip, Stam2, Zfyve16, Xpo7, Cyld,
GO:0050865	regulation of cell activa	0.04762 ( 21 of 441 genes )	0.00944 ( 321 of 34011 annotated genes )	1.589e-09	2.828e-06	Stat5b, Pram1, Ap3b1, Clptm1, Nfkbid, Itpkb, Ctla4, Ptpn22, Hsp90aa1, Cd86, Prkcd, Stxbp2, Hspd1, Lck, Ccl5, Zap70, Pdpk1, Ptprc, Nckap1l, Il12rb1, Stat6,
GO:0050863	regulation of T cell acti	0.03628 ( 16 of 441 genes )	0.00526 ( 179 of 34011 annotated genes )	1.71e-09	3.044e-06	Stat5b, Ap3b1, Clptm1, Nfkbid, Itpkb, Ctla4, Ptpn22, Hsp90aa1, Cd86, Hspd1, Ccl5, Lck, Zap70, Ptprc, Nckap1l, Il12rb1,
GO:0030098	lymphocyte differentiatio	0.04082 ( 18 of 441 genes )	0.00691 ( 235 of 34011 annotated genes )	1.994e-09	3.549e-06	Stat5b, Tusc2, Ap3b1, Satb1, Clptm1, Foxp1, Nfkbid, Bcl11b, Itpkb, Ctla4, Ptpn22, Hsp90aa1, Lck, Zap70, Ptprc, Nckap1l, Stat6, Itk,
GO:0051641	cellular localization	0.11338 ( 50 of 441 genes )	0.04510 ( 1534 of 34011 annotated genes )	2.066e-09	3.678e-06	Pi4k2a, Pram1, Exoc2, Creb1, Prkcb, Ap3m1, Erc1, Hsp90aa1, Bub3, Cux1, Rab13, Sod1, Ppp1r12a, Tesc, Stxbp2, Tnrc6a, Tnnc1, Actr2, Bat3, Trim27, Pdpk1, Rab14, Snx27, Med1, Cog2, Ranbp2, Snx13, Copb1, Ppp3ca, Ap3b1, Ap2b1, Syne1, Atp2c1, Ep300, Sdccag1, Vps24, Rtn4, Banp, Smad4, Dnajc1, Tbrg1, Ubr5, Snx9, Cep57, Ccl5, Phip, Stam2, Zfyve16, Xpo7, Cyld,
GO:0043254	regulation of protein com	0.03628 ( 16 of 441 genes )	0.00541 ( 184 of 34011 annotated genes )	2.555e-09	4.548e-06	Prex1, Clip1, Rdx, Prkcd, Ppm1a, Cdkn1b, Snx9, Creb1, Fkbp4, Bclaf1, Stub1, Hcfc1, Add1, Nckap1l, Vegfa, Rictor,
GO:0002694	regulation of leukocyte a	0.04535 ( 20 of 441 genes )	0.00882 ( 300 of 34011 annotated genes )	2.826e-09	5.03e-06	Stat5b, Pram1, Ap3b1, Clptm1, Nfkbid, Itpkb, Ctla4, Ptpn22, Hsp90aa1, Cd86, Stxbp2, Hspd1, Ccl5, Lck, Zap70, Pdpk1, Ptprc, Nckap1l, Il12rb1, Stat6,
GO:0065008	regulation of biological	0.14512 ( 64 of 441 genes )	0.06668 ( 2268 of 34011 annotated genes )	2.999e-09	5.338e-06	Stat5b, Ino80, Rps24, Cul5, Prkcb, Hsp90aa1, Bub3, Tesc, Tnrc6a, Mll5, Ikbkb, Usp7, Ppp3ca, Ap2b1, Stub1, Vps24, Hcfc1, Rtn4, Smad4, Itpr1, Ncf2, Ccl5, Pde4b, Ptprc, Nckap1l, Ccdc88c, Smc5, Creb1, Malat1, Gnas, Clic1, Sod1, Prex1, Prkcd, Tnnc1, Bat3, Brwd1, Sh3kbp1, Add1, Rab14, Med1, Vegfa, Rictor, Cdkn1b, S1pr1, Syne1, Ap3b1, Ep300, Atp2c1, Ibtk, Wnk1, Trpm7, Tbrg1, Rapgef2, Rdx, Arih2, Dicer1,…
GO:0007275	multicellular organismal	0.19728 ( 87 of 441 genes )	0.10479 ( 3564 of 34011 annotated genes )	3.54e-09	6.302e-06	Stat5b, Cdk13, Prkcb, Clptm1, Fam48a, Nfkbid, Ehmt1, Bcl11b, Hsp90aa1, Tesc, Mll5, Atg7, Rnf17, Flii, Stat6, Itk, Usp7, Vezf1, Nfatc3, Ppp3ca, Mbnl1, Foxn3, Prkar1a, Rtn4, Ctla4, Brd4, Smad4, Banp, Itpr1, Fbxo45, Runx1, Ccl5, Ptprc, Aimp2, Nckap1l, Reck, Kdm5a, Rufy3, Creb1, Satb1, Foxp1, Tctn1, Gnas, Rab18, Ptpn22, Ptpra, Cux1, Nasp, Sod1, Stk4, Cd86, Prex1, Numb, Hdac4, Tnnc1, Bat3, Pdpk1, Add1…
GO:0006259	DNA metabolic process	0.06576 ( 29 of 441 genes )	0.01838 ( 625 of 34011 annotated genes )	3.854e-09	6.861e-06	Ino80, Smc5, Parp2, Ube2d3, Stub1, Foxp1, Usp28, Ehmt1, Gnas, Bcl11b, Cst3, Stag2, Smc4, Nasp, Tbrg1, Sod1, Ing4, Sfpq, Mll5, Morf4l1, Hspd1, Obfc2a, Mcm9, Ptprc, Stat6, Med1, Rev3l, Usp7, Helb,
GO:0009892	negative regulation of me	0.10204 ( 45 of 441 genes )	0.03908 ( 1329 of 34011 annotated genes )	4.514e-09	8.034e-06	Rdbp, Creb1, Satb1, Foxp1, Atxn7, Iqgap1, Ehmt1, Cux1, Sod1, Tnrc6b, Ing4, Prkcd, Hdac4, Tnrc6a, Supt4h1, Bat3, Trim27, Epc1, Pggt1b, Bptf, Stat6, Myst3, Med1, Tcf25, Sp100, Ubtf, Wac, Cdkn1b, Bclaf1, Ibtk, Ep300, Foxn3, Zbtb20, Rtf1, Cst3, Ilf3, Banp, Dusp10, Smad4, Stag2, Dicer1, Ccl5, Hnrnpa2b1, Lcor, Ptprc,
GO:0048856	anatomical structure deve	0.19048 ( 84 of 441 genes )	0.10044 ( 3416 of 34011 annotated genes )	5.042e-09	8.974e-06	Stat5b, Psmb10, Csnk1a1, Cdk13, Prkcb, Clptm1, Fam48a, Nfkbid, Bcl11b, Hsp90aa1, Tesc, Mll5, Atg7, Epc1, Rnf17, Stat6, Itk, Vezf1, Nfatc3, Ppp3ca, Mbnl1, Foxn3, Prkar1a, Rtn4, Msi2, Ctla4, Brd4, Smad4, Stag2, Fbxo45, Runx1, Ccl5, Ptprc, Aimp2, Nckap1l, Reck, Rufy3, Creb1, Satb1, Foxp1, Tctn1, Gnas, Ptpn22, Ptpra, Cux1, Nasp, Sod1, Stk4, Cd86, Prex1, Numb, Hdac4, Tnnc1, Bat3, Pdpk1, Add1, Bptf, Me…
GO:0045944	positive regulation of tr	0.07029 ( 31 of 441 genes )	0.02102 ( 715 of 34011 annotated genes )	5.452e-09	9.705e-06	Stat5b, Nfatc3, Ino80, S1pr1, Ppp3ca, Creb1, Foxp1, Ep300, Atxn7, Med13, Bcl11b, Rtf1, Smad4, Ccpg1, Ppp1r12a, Runx1, Hdac4, Dicer1, Taf1, Supt4h1, Cdk5rap3, Epc1, Stk16, Phip, Nfat5, Ncoa3, Stat6, Gabpb1, Med1, Vegfa, Slc30a9,
GO:0045580	regulation of T cell diff	0.02494 ( 11 of 441 genes )	0.00232 ( 79 of 34011 annotated genes )	5.873e-09	1.045e-05	Stat5b, Ap3b1, Clptm1, Lck, Zap70, Nfkbid, Itpkb, Ptprc, Ctla4, Nckap1l, Hsp90aa1,
GO:0044093	positive regulation of mo	0.08163 ( 36 of 441 genes )	0.02731 ( 929 of 34011 annotated genes )	5.926e-09	1.055e-05	Rhebl1, Zc3hav1, Prkcb, Iqgap1, Gnas, Ccnd2, Stk4, Sod1, Map3k5, Tesc, Prkcd, Hdac4, Ikbkb, Crtc3, Pdpk1, Add1, Fdx1, Med1, Itk, Vegfa, Snx13, Sp100, Cdkn1b, S1pr1, Ep300, Pim1, Brd4, Rapgef2, Rqcd1, Snx9, Hspd1, Ccl5, Lck, Ncoa3, Ptprc, Nckap1l,
GO:0010941	regulation of cell death	0.09524 ( 42 of 441 genes )	0.03546 ( 1206 of 34011 annotated genes )	6.881e-09	1.225e-05	Stat5b, Creb1, Usp28, Nfkbid, Bcl11b, Cflar, Stk4, Sod1, Ing4, Map3k5, Prkcd, Cbl, Bat3, Atg7, Pdpk1, Med1, Vegfa, Usp7, Cd3g, Cdkn1b, Bclaf1, Ep300, Pim1, Ikbke, Ctla4, Dapk1, Rtn4, Cst3, Smad4, Trpm7, Ncf2, Dicer1, Hspd1, Lck, Ccl5, Phip, Ncoa3, Ptprc, Rbm5, Nckap1l, Cyld, Klhl20,
GO:0043067	regulation of programmed	0.09297 ( 41 of 441 genes )	0.03437 ( 1169 of 34011 annotated genes )	8.633e-09	1.537e-05	Stat5b, Creb1, Usp28, Nfkbid, Bcl11b, Cflar, Stk4, Sod1, Ing4, Map3k5, Prkcd, Cbl, Bat3, Atg7, Pdpk1, Med1, Vegfa, Usp7, Cd3g, Cdkn1b, Bclaf1, Ep300, Pim1, Ikbke, Ctla4, Dapk1, Rtn4, Cst3, Trpm7, Ncf2, Dicer1, Hspd1, Lck, Ccl5, Phip, Ncoa3, Ptprc, Rbm5, Nckap1l, Cyld, Klhl20,
GO:0006473	protein acetylation	0.02948 ( 13 of 441 genes )	0.00368 ( 125 of 34011 annotated genes )	9.317e-09	1.658e-05	Ing4, Taf1, Bat3, Morf4l1, Tada3, Nat15, Epc1, Ep300, Naa15, Ncoa3, Hcfc1, Brd4, Myst3,
GO:0002684	positive regulation of im	0.05215 ( 23 of 441 genes )	0.01253 ( 426 of 34011 annotated genes )	1.033e-08	1.838e-05	Stat5b, Cd37, Ap3b1, Prkcb, Foxp1, Itpkb, Ctla4, Ptpn22, Hsp90aa1, Cd86, Stxbp2, Pecam1, Hspd1, Lck, Ccl5, Zap70, Pdpk1, Ptprc, Nckap1l, Il12rb1, Stat6, Itk, Vegfa,
GO:0006412	translation	0.05215 ( 23 of 441 genes )	0.01255 ( 427 of 34011 annotated genes )	1.079e-08	1.92e-05	Mif4gd, Eif4e2, Rps24, Rps23, Pum2, Eif3c, Ep300, Pum1, Nars, Eprs, Denr, Dnajc1, Tnrc6b, Eif4a2, Rpl7, Tnrc6a, Rps7, Eif5b, Aimp2, Rps8, Dhx29, Eif3g, Rpl37a,
GO:0006950	response to stress	0.13152 ( 58 of 441 genes )	0.05977 ( 2033 of 34011 annotated genes )	1.241e-08	2.208e-05	Stat5b, Ino80, Smc5, Edem3, Map4k4, Zc3hav1, Parp2, Ube2d3, Usp28, Nfkbid, Atg13, Hsp90aa1, Sod1, Hspe1, Map3k5, Ing4, Cd86, Prkcd, Tnrc6a, Bat3, Pecam1, Morf4l1, Obfc2a, Atg7, Pdpk1, Cnpy3, Srsf5, Med1, Il12rb1, Rev3l, Vegfa, Usp7, Sp100, Wac, Ppp3ca, Ap3b1, Bclaf1, Stub1, Ep300, Ikbke, Ctla4, Rtn4, Cst3, Smad4, Dusp10, Smc4, Ubr5, Fbxo45, Itpr1, Sfpq, Runx1, Myof, Dicer1, Hspd1, Lck, Ccl5, Ptpr…
GO:0009166	nucleotide catabolic proc	0.05669 ( 25 of 441 genes )	0.01494 ( 508 of 34011 annotated genes )	1.486e-08	2.646e-05	Rhebl1, Rabgap1, Ino80, S1pr1, Zc3hav1, Atp2c1, Gnas, Rab21, Hsp90aa1, Rab13, Rapgef2, Nt5c, Atp6v1c1, Snx9, Ncf2, Tnnc1, Pde4b, Tuba4a, Nckap1l, Rab14, Ddx3x, Tbc1d10c, Snx13, Rictor, Helb,
GO:0018393	internal peptidyl-lysine	0.02721 ( 12 of 441 genes )	0.00320 ( 109 of 34011 annotated genes )	1.82e-08	3.24e-05	Ing4, Taf1, Bat3, Morf4l1, Tada3, Nat15, Epc1, Ep300, Ncoa3, Hcfc1, Brd4, Myst3,
GO:0042981	regulation of apoptosis	0.09070 ( 40 of 441 genes )	0.03405 ( 1158 of 34011 annotated genes )	2.006e-08	3.57e-05	Stat5b, Creb1, Usp28, Nfkbid, Bcl11b, Cflar, Stk4, Sod1, Ing4, Map3k5, Prkcd, Cbl, Bat3, Atg7, Pdpk1, Med1, Vegfa, Usp7, Cd3g, Cdkn1b, Bclaf1, Ep300, Pim1, Ikbke, Dapk1, Ctla4, Rtn4, Trpm7, Ncf2, Dicer1, Hspd1, Lck, Ccl5, Phip, Ncoa3, Ptprc, Rbm5, Nckap1l, Cyld, Klhl20,
GO:0022607	cellular component assemb	0.09751 ( 43 of 441 genes )	0.03831 ( 1303 of 34011 annotated genes )	2.127e-08	3.786e-05	Ino80, Pum2, Creb1, Foxp1, Atg13, Celf2, Hsp90aa1, Prex1, Prkcd, Bat3, Crtc3, Trim27, Nat15, Clpp, Pdpk1, Uqcrh, Add1, Hist3h2a, Vegfa, Rictor, Cdkn1b, Ppm1a, S1pr1, Ap2b1, Mbnl1, Bclaf1, Stub1, Ep300, Hcfc1, Smad4, Clip1, Rdx, Snx9, Dicer1, Ak3, Fkbp4, Cep57, Ccl5, Prpf31, Rbm5, Tuba4a, Nckap1l, Ccdc88c,
GO:0018394	peptidyl-lysine acetylati	0.02721 ( 12 of 441 genes )	0.00326 ( 111 of 34011 annotated genes )	2.238e-08	3.984e-05	Ing4, Taf1, Bat3, Morf4l1, Tada3, Nat15, Epc1, Ep300, Ncoa3, Hcfc1, Brd4, Myst3,
GO:0045597	positive regulation of ce	0.05442 ( 24 of 441 genes )	0.01426 ( 485 of 34011 annotated genes )	2.611e-08	4.648e-05	Stat5b, Creb1, Ap3b1, Ep300, Gnas, Itpkb, Rtn4, Ptpra, Clic1, Hsp90aa1, Smad4, Tesc, Numb, Runx1, Mll5, Lck, Ccl5, Epc1, Zap70, Ncoa3, Ptprc, Nckap1l, Med1, Vegfa,
GO:2000026	regulation of multicellul	0.08844 ( 39 of 441 genes )	0.03305 ( 1124 of 34011 annotated genes )	2.704e-08	4.812e-05	Stat5b, Prkcb, Clptm1, Foxp1, Nfkbid, Gnas, Bcl11b, Ptpra, Hsp90aa1, Prex1, Cd86, Tesc, Numb, Hdac4, Mll5, Add1, Stat6, Med1, Vegfa, Cdkn1b, Ap3b1, Syne1, Ep300, Itpkb, Ctla4, Rtn4, Ttc3, Smad4, Runx1, Dicer1, Lck, Ccl5, Zap70, Meis1, Ncoa3, Ptprc, Nckap1l, Gtf2i, Rufy3,
GO:0031324	negative regulation of ce	0.09070 ( 40 of 441 genes )	0.03443 ( 1171 of 34011 annotated genes )	2.712e-08	4.827e-05	Rdbp, Creb1, Satb1, Foxp1, Atxn7, Iqgap1, Ehmt1, Cux1, Ing4, Prkcd, Hdac4, Tnrc6a, Supt4h1, Bat3, Trim27, Epc1, Bptf, Stat6, Myst3, Med1, Tcf25, Sp100, Ubtf, Wac, Cdkn1b, Bclaf1, Ibtk, Ep300, Foxn3, Zbtb20, Rtf1, Cst3, Ilf3, Smad4, Stag2, Dicer1, Ccl5, Hnrnpa2b1, Lcor, Ptprc,
GO:0006475	internal protein amino ac	0.02721 ( 12 of 441 genes )	0.00332 ( 113 of 34011 annotated genes )	2.741e-08	4.878e-05	Ing4, Taf1, Bat3, Morf4l1, Tada3, Nat15, Epc1, Ep300, Ncoa3, Hcfc1, Brd4, Myst3,
GO:0034655	nucleobase, nucleoside, n	0.05669 ( 25 of 441 genes )	0.01547 ( 526 of 34011 annotated genes )	2.931e-08	5.218e-05	Rhebl1, Rabgap1, Ino80, S1pr1, Zc3hav1, Atp2c1, Gnas, Rab21, Hsp90aa1, Rab13, Rapgef2, Nt5c, Atp6v1c1, Snx9, Ncf2, Tnnc1, Pde4b, Tuba4a, Nckap1l, Rab14, Ddx3x, Tbc1d10c, Snx13, Rictor, Helb,
GO:0034656	nucleobase, nucleoside an	0.05669 ( 25 of 441 genes )	0.01547 ( 526 of 34011 annotated genes )	2.931e-08	5.218e-05	Rhebl1, Rabgap1, Ino80, S1pr1, Zc3hav1, Atp2c1, Gnas, Rab21, Hsp90aa1, Rab13, Rapgef2, Nt5c, Atp6v1c1, Snx9, Ncf2, Tnnc1, Pde4b, Tuba4a, Nckap1l, Rab14, Ddx3x, Tbc1d10c, Snx13, Rictor, Helb,
GO:0009966	regulation of signal tran	0.10431 ( 46 of 441 genes )	0.04313 ( 1467 of 34011 annotated genes )	3.061e-08	5.448e-05	Map4k4, Zc3hav1, Prkcb, Atxn7, Tctn1, Nfkbid, Als2cl, Ptpn22, Stk4, Sod1, Prex1, Map3k5, Prkcd, Numb, Ikbkb, Cbl, Pecam1, Pdpk1, Nfat5, Med1, Vegfa, Snx13, Rictor, Pja2, Rabgap1, Ppm1a, S1pr1, Atp2c1, Ep300, Itpkb, Dapk1, Gapvd1, Dusp10, Smad4, Rapgef2, Ubr5, Myof, Runx1, Lck, Ccl5, Zap70, Ncoa3, Ptprc, Nckap1l, Cyld, Tbc1d10c,
GO:0071844	cellular component assemb	0.07710 ( 34 of 441 genes )	0.02652 ( 902 of 34011 annotated genes )	3.111e-08	5.537e-05	Ino80, S1pr1, Ppm1a, Cdkn1b, Pum2, Creb1, Ap2b1, Mbnl1, Stub1, Foxp1, Ep300, Atg13, Celf2, Hsp90aa1, Smad4, Prex1, Clip1, Rdx, Prkcd, Snx9, Dicer1, Bat3, Fkbp4, Prpf31, Ccl5, Nat15, Pdpk1, Rbm5, Add1, Tuba4a, Nckap1l, Hist3h2a, Vegfa, Rictor,
GO:0023051	regulation of signaling	0.11565 ( 51 of 441 genes )	0.05069 ( 1724 of 34011 annotated genes )	3.327e-08	5.922e-05	Map4k4, Zc3hav1, Creb1, Prkcb, Atxn7, Tctn1, Nfkbid, Als2cl, Ptpn22, Stk4, Sod1, Prex1, Map3k5, Prkcd, Numb, Ikbkb, Cbl, Pecam1, Pdpk1, Nfat5, Med1, Vegfa, Snx13, Rictor, Pja2, Rabgap1, Ppm1a, S1pr1, Ppp3ca, Atp2c1, Ep300, Itpkb, Dapk1, Rtn4, Gapvd1, Smad4, Dusp10, Rapgef2, Ubr5, Myof, Runx1, Dicer1, Lnpep, Lck, Ccl5, Zap70, Ncoa3, Ptprc, Nckap1l, Cyld, Tbc1d10c,
GO:0012501	programmed cell death	0.10204 ( 45 of 441 genes )	0.04187 ( 1424 of 34011 annotated genes )	3.491e-08	6.214e-05	Stat5b, Creb1, Prkcb, Ube2d3, Usp28, Nfkbid, Bcl11b, Cflar, Stk4, Sod1, Map3k5, Ing4, Prkcd, Cbl, Bat3, Atg7, Pdpk1, Sh3kbp1, Med1, Vegfa, Usp7, Cd3g, Cdkn1b, Bclaf1, Ep300, Pim1, Ikbke, Ctla4, Dapk1, Rtn4, Cst3, Trpm7, Ncf2, Dicer1, Hspd1, Lck, Ccl5, Phip, Aimp2, Ncoa3, Ptprc, Rbm5, Nckap1l, Cyld, Klhl20,
GO:0044087	regulation of cellular co	0.04308 ( 19 of 441 genes )	0.00926 ( 315 of 34011 annotated genes )	3.521e-08	6.268e-05	S1pr1, Ppm1a, Cdkn1b, Creb1, Bclaf1, Stub1, Ep300, Hcfc1, Hsp90aa1, Clip1, Prex1, Prkcd, Rdx, Snx9, Fkbp4, Add1, Nckap1l, Vegfa, Rictor,
GO:0050870	positive regulation of T	0.02721 ( 12 of 441 genes )	0.00341 ( 116 of 34011 annotated genes )	3.684e-08	6.558e-05	Stat5b, Cd86, Ap3b1, Hspd1, Lck, Ccl5, Zap70, Itpkb, Ptprc, Nckap1l, Hsp90aa1, Il12rb1,
GO:0022402	cell cycle process	0.07029 ( 31 of 441 genes )	0.02290 ( 779 of 34011 annotated genes )	3.865e-08	6.88e-05	Ino80, Wac, Smc5, Cdkn1b, Csnk1a1, Ppp3ca, Cdc27, Usp28, Pim1, Ccnd2, Brd4, Dis3l2, Bub3, Stag2, Smc4, Tbrg1, Ing4, Ppp1r12a, Sirt7, Actr2, Dicer1, Mll5, Taf1, Usp37, Bat3, Cdc16, Obfc2a, Ptprc, Gigyf2, Med1, Usp9x,
GO:0043543	protein acylation	0.02948 ( 13 of 441 genes )	0.00420 ( 143 of 34011 annotated genes )	4.725e-08	8.41e-05	Ing4, Taf1, Bat3, Morf4l1, Tada3, Nat15, Epc1, Ep300, Naa15, Ncoa3, Hcfc1, Brd4, Myst3,
GO:0046700	heterocycle catabolic pro	0.05669 ( 25 of 441 genes )	0.01591 ( 541 of 34011 annotated genes )	5.043e-08	8.976e-05	Rhebl1, Rabgap1, Ino80, S1pr1, Zc3hav1, Atp2c1, Gnas, Rab21, Hsp90aa1, Rab13, Rapgef2, Nt5c, Atp6v1c1, Snx9, Ncf2, Tnnc1, Pde4b, Tuba4a, Nckap1l, Rab14, Ddx3x, Tbc1d10c, Snx13, Rictor, Helb,
GO:0051249	regulation of lymphocyte	0.03855 ( 17 of 441 genes )	0.00759 ( 258 of 34011 annotated genes )	5.196e-08	9.249e-05	Stat5b, Ap3b1, Clptm1, Nfkbid, Itpkb, Ctla4, Ptpn22, Hsp90aa1, Cd86, Hspd1, Ccl5, Lck, Zap70, Ptprc, Nckap1l, Il12rb1, Stat6,
GO:0008219	cell death	0.10431 ( 46 of 441 genes )	0.04399 ( 1496 of 34011 annotated genes )	5.439e-08	9.681e-05	Stat5b, Creb1, Prkcb, Ube2d3, Usp28, Nfkbid, Bcl11b, Cflar, Stk4, Sod1, Map3k5, Ing4, Prkcd, Cbl, Bat3, Atg7, Pdpk1, Sh3kbp1, Med1, Vegfa, Usp7, Cd3g, Cdkn1b, Bclaf1, Ep300, Pim1, Ikbke, Ctla4, Dapk1, Rtn4, Cst3, Smad4, Trpm7, Ncf2, Dicer1, Hspd1, Lck, Ccl5, Phip, Aimp2, Ncoa3, Ptprc, Rbm5, Nckap1l, Cyld, Klhl20,
GO:0044270	cellular nitrogen compoun	0.05669 ( 25 of 441 genes )	0.01599 ( 544 of 34011 annotated genes )	5.607e-08	9.98e-05	Rhebl1, Rabgap1, Ino80, S1pr1, Zc3hav1, Atp2c1, Gnas, Rab21, Hsp90aa1, Rab13, Rapgef2, Nt5c, Atp6v1c1, Snx9, Ncf2, Tnnc1, Pde4b, Tuba4a, Nckap1l, Rab14, Ddx3x, Tbc1d10c, Snx13, Rictor, Helb,
GO:0016265	death	0.10431 ( 46 of 441 genes )	0.04422 ( 1504 of 34011 annotated genes )	6.353e-08	0.0001131	Stat5b, Creb1, Prkcb, Ube2d3, Usp28, Nfkbid, Bcl11b, Cflar, Stk4, Sod1, Map3k5, Ing4, Prkcd, Cbl, Bat3, Atg7, Pdpk1, Sh3kbp1, Med1, Vegfa, Usp7, Cd3g, Cdkn1b, Bclaf1, Ep300, Pim1, Ikbke, Ctla4, Dapk1, Rtn4, Cst3, Smad4, Trpm7, Ncf2, Dicer1, Hspd1, Lck, Ccl5, Phip, Aimp2, Ncoa3, Ptprc, Rbm5, Nckap1l, Cyld, Klhl20,
GO:0006915	apoptosis	0.09977 ( 44 of 441 genes )	0.04131 ( 1405 of 34011 annotated genes )	6.469e-08	0.0001151	Stat5b, Creb1, Prkcb, Ube2d3, Usp28, Nfkbid, Bcl11b, Cflar, Stk4, Sod1, Ing4, Map3k5, Prkcd, Cbl, Bat3, Atg7, Pdpk1, Sh3kbp1, Med1, Vegfa, Usp7, Cd3g, Cdkn1b, Bclaf1, Ep300, Pim1, Ikbke, Ctla4, Dapk1, Rtn4, Trpm7, Ncf2, Dicer1, Hspd1, Lck, Ccl5, Phip, Aimp2, Ncoa3, Ptprc, Rbm5, Nckap1l, Cyld, Klhl20,
GO:0050776	regulation of immune resp	0.04535 ( 20 of 441 genes )	0.01070 ( 364 of 34011 annotated genes )	7.147e-08	0.0001272	Stat5b, Cd37, Pram1, Prkcb, Ctla4, Ptpn22, Dusp10, Cd86, Stxbp2, Hspd1, Trim27, Lck, Zap70, Pdpk1, Ptprc, Nckap1l, Med1, Il12rb1, Stat6, Itk,
GO:0010608	posttranscriptional regul	0.04308 ( 19 of 441 genes )	0.00985 ( 335 of 34011 annotated genes )	9.273e-08	0.0001651	Mif4gd, Eif4e2, Pum2, Creb1, Ep300, Pum1, Hcfc1, Dnajc1, Tbrg1, Tnrc6b, Tesc, Dicer1, Tnrc6a, Bat3, Hspd1, Eif5b, Vegfa, Usp7, Ccdc88c,
GO:0048869	cellular developmental pr	0.14966 ( 66 of 441 genes )	0.07645 ( 2600 of 34011 annotated genes )	9.519e-08	0.0001694	Stat5b, Psmb10, Csnk1a1, Clptm1, Nfkbid, Bcl11b, Hsp90aa1, Tesc, Mll5, Atg7, Epc1, Rnf17, Stat6, Itk, Vezf1, Nfatc3, Ppp3ca, Mbnl1, Rtn4, Ctla4, Msi2, Smad4, Stag2, Runx1, Ccl5, Ptprc, Aimp2, Nckap1l, Rufy3, Creb1, Satb1, Foxp1, Tctn1, Gnas, Clic1, Ptpn22, Ptpra, Cux1, Sod1, Stk4, Prex1, Numb, Hdac4, Bat3, Pdpk1, Add1, Med1, Myst3, Yipf3, Vegfa, Tusc2, Syne1, Ap3b1, Ep300, Itpkb, Ttc3, Rtf1, Dusp…
GO:0045619	regulation of lymphocyte	0.02494 ( 11 of 441 genes )	0.00303 ( 103 of 34011 annotated genes )	9.83e-08	0.000175	Stat5b, Ap3b1, Clptm1, Lck, Zap70, Nfkbid, Itpkb, Ptprc, Ctla4, Nckap1l, Hsp90aa1,
GO:0033554	cellular response to stre	0.07483 ( 33 of 441 genes )	0.02655 ( 903 of 34011 annotated genes )	1.022e-07	0.000182	Ino80, Smc5, Map4k4, Parp2, Ube2d3, Usp28, Atg13, Sod1, Ing4, Map3k5, Prkcd, Tnrc6a, Bat3, Morf4l1, Atg7, Obfc2a, Rev3l, Vegfa, Usp7, Sp100, Wac, Bclaf1, Ep300, Stub1, Ikbke, Ctla4, Rtn4, Dusp10, Smc4, Fbxo45, Ubr5, Sfpq, Myof,
GO:0010605	negative regulation of ma	0.09070 ( 40 of 441 genes )	0.03634 ( 1236 of 34011 annotated genes )	1.137e-07	0.0002023	Rdbp, Creb1, Satb1, Foxp1, Ehmt1, Cux1, Tnrc6b, Ing4, Prkcd, Hdac4, Tnrc6a, Supt4h1, Bat3, Trim27, Epc1, Pggt1b, Bptf, Stat6, Myst3, Med1, Tcf25, Sp100, Ubtf, Wac, Cdkn1b, Bclaf1, Ibtk, Ep300, Foxn3, Zbtb20, Rtf1, Cst3, Ilf3, Banp, Smad4, Stag2, Dicer1, Hnrnpa2b1, Lcor, Ptprc,
GO:0006195	purine nucleotide catabol	0.05215 ( 23 of 441 genes )	0.01429 ( 486 of 34011 annotated genes )	1.138e-07	0.0002025	Rhebl1, Rabgap1, Ino80, S1pr1, Zc3hav1, Atp2c1, Gnas, Rab21, Hsp90aa1, Rab13, Rapgef2, Atp6v1c1, Snx9, Tnnc1, Pde4b, Tuba4a, Nckap1l, Rab14, Ddx3x, Snx13, Tbc1d10c, Rictor, Helb,
GO:0006396	RNA processing	0.05442 ( 24 of 441 genes )	0.01544 ( 525 of 34011 annotated genes )	1.142e-07	0.0002032	Rrp36, Rps24, Wdr33, Cdk13, Rpf1, Malat1, Rbm27, Mbnl1, Aqr, Celf2, Sfpq, Rpl7, Dicer1, Rps7, Bcas2, Prpf31, Hnrnpa2b1, Rbm5, Rps8, Rbm39, Hnrnpa3, Snrpa1, Hnrnpm, Trmt12,
GO:0006753	nucleoside phosphate meta	0.07029 ( 31 of 441 genes )	0.02429 ( 826 of 34011 annotated genes )	1.414e-07	0.0002517	Rhebl1, Rabgap1, Ino80, S1pr1, Gart, Zc3hav1, Atp2c1, Gnas, Rab21, Npr2, Nt5c3l, Hsp90aa1, Rab13, Rapgef2, Nt5c, Atp6v1c1, Snx9, Ncf2, Tnnc1, Ak3, Pde4b, Tuba4a, Nckap1l, Rab14, Fdx1, Glyr1, Ddx3x, Tbc1d10c, Snx13, Rictor, Helb,
GO:0009117	nucleotide metabolic proc	0.07029 ( 31 of 441 genes )	0.02429 ( 826 of 34011 annotated genes )	1.414e-07	0.0002517	Rhebl1, Rabgap1, Ino80, S1pr1, Gart, Zc3hav1, Atp2c1, Gnas, Rab21, Npr2, Nt5c3l, Hsp90aa1, Rab13, Rapgef2, Nt5c, Atp6v1c1, Snx9, Ncf2, Tnnc1, Ak3, Pde4b, Tuba4a, Nckap1l, Rab14, Fdx1, Glyr1, Ddx3x, Tbc1d10c, Snx13, Rictor, Helb,
GO:0016573	histone acetylation	0.02494 ( 11 of 441 genes )	0.00315 ( 107 of 34011 annotated genes )	1.458e-07	0.0002596	Ing4, Taf1, Morf4l1, Tada3, Nat15, Epc1, Ep300, Hcfc1, Ncoa3, Brd4, Myst3,
GO:0072523	purine-containing compoun	0.05215 ( 23 of 441 genes )	0.01450 ( 493 of 34011 annotated genes )	1.467e-07	0.0002611	Rhebl1, Rabgap1, Ino80, S1pr1, Zc3hav1, Atp2c1, Gnas, Rab21, Hsp90aa1, Rab13, Rapgef2, Atp6v1c1, Snx9, Tnnc1, Pde4b, Tuba4a, Nckap1l, Rab14, Ddx3x, Snx13, Tbc1d10c, Rictor, Helb,
GO:0006955	immune response	0.06122 ( 27 of 441 genes )	0.01926 ( 655 of 34011 annotated genes )	1.484e-07	0.0002641	Stat5b, Cd37, Pi4k2a, Pram1, Prkcb, Ctla4, Ptpn22, Dusp10, Cd86, Map3k5, Prkcd, Stxbp2, Hspd1, Lck, Trim27, Ccl5, Zap70, Pdpk1, Ptprc, Cnpy3, Nckap1l, Stat6, Il12rb1, Med1, Itk, Vegfa, Sp100,
GO:0000377	RNA splicing, via transes	0.02268 ( 10 of 441 genes )	0.00250 ( 85 of 34011 annotated genes )	1.499e-07	0.0002668	Sfpq, Cdk13, Malat1, Mbnl1, Prpf31, Hnrnpa2b1, Rbm5, Aqr, Celf2, Hnrnpm,
GO:0000398	nuclear mRNA splicing, vi	0.02268 ( 10 of 441 genes )	0.00250 ( 85 of 34011 annotated genes )	1.499e-07	0.0002668	Sfpq, Cdk13, Malat1, Mbnl1, Prpf31, Hnrnpa2b1, Rbm5, Aqr, Celf2, Hnrnpm,
GO:0046483	heterocycle metabolic pro	0.07710 ( 34 of 441 genes )	0.02846 ( 968 of 34011 annotated genes )	1.648e-07	0.0002933	Stat5b, Rhebl1, Ino80, Zc3hav1, Gnas, Rab21, Hsp90aa1, Rab13, Nt5c, Tnnc1, Mocos, Rab14, Fdx1, Ddx3x, Snx13, Rictor, Helb, Rabgap1, S1pr1, Gart, Atp2c1, Slc25a39, P4ha1, Npr2, Rapgef2, Ncf2, Snx9, Atp6v1c1, Ak3, Pde4b, Nckap1l, Tuba4a, Glyr1, Tbc1d10c,
GO:0000375	RNA splicing, via transes	0.02268 ( 10 of 441 genes )	0.00253 ( 86 of 34011 annotated genes )	1.677e-07	0.0002985	Sfpq, Cdk13, Malat1, Mbnl1, Prpf31, Hnrnpa2b1, Rbm5, Aqr, Celf2, Hnrnpm,
GO:0006974	response to DNA damage st	0.04989 ( 22 of 441 genes )	0.01364 ( 464 of 34011 annotated genes )	2.082e-07	0.0003705	Ino80, Wac, Smc5, Parp2, Ube2d3, Stub1, Ep300, Usp28, Ikbke, Ctla4, Smc4, Sod1, Ubr5, Fbxo45, Ing4, Sfpq, Bat3, Morf4l1, Obfc2a, Rev3l, Usp7, Sp100,
GO:0030154	cell differentiation	0.14286 ( 63 of 441 genes )	0.07327 ( 2492 of 34011 annotated genes )	2.247e-07	0.0004	Stat5b, Creb1, Satb1, Clptm1, Foxp1, Tctn1, Nfkbid, Gnas, Bcl11b, Ptpra, Ptpn22, Hsp90aa1, Clic1, Cux1, Stk4, Sod1, Prex1, Tesc, Numb, Hdac4, Mll5, Bat3, Atg7, Epc1, Pdpk1, Rnf17, Add1, Stat6, Myst3, Med1, Yipf3, Itk, Vegfa, Vezf1, Nfatc3, Tusc2, Ppp3ca, Ap3b1, Syne1, Mbnl1, Ep300, Itpkb, Ttc3, Rtn4, Ctla4, Msi2, Rtf1, Smad4, Dusp10, Stag2, Arih2, Runx1, Dicer1, Lck, Ccl5, Zap70, Meis1, Ptprc, Ai…
GO:0031399	regulation of protein mod	0.07029 ( 31 of 441 genes )	0.02487 ( 846 of 34011 annotated genes )	2.377e-07	0.0004231	Cdkn1b, Ibtk, Stub1, Ep300, Pim1, Iqgap1, Prkar1a, Gnas, Ccnd2, Wnk1, Rtf1, Smad4, Dusp10, Stk4, Sod1, Map3k5, Prkcd, Hdac4, Pecam1, Atg7, Lck, Trim27, Ccl5, Pdpk1, Phip, Ptprc, Aimp2, Nckap1l, Vegfa, Ccdc88c, Rictor,
GO:0007243	intracellular protein kin	0.06576 ( 29 of 441 genes )	0.02238 ( 761 of 34011 annotated genes )	2.637e-07	0.0004695	Stat5b, Ppm1a, Map4k4, Zc3hav1, Prkcb, Erc1, Ep300, Atp2c1, Nfkbid, Ikbke, Itpkb, Wnk1, Dapk1, Dusp10, Stk4, Sod1, Map3k5, Prkcd, Ikbkb, Pecam1, Lck, Rel, Ccl5, Pdpk1, Ptprc, Med1, Vegfa, Rictor, Pja2,
GO:0006508	proteolysis	0.07483 ( 33 of 441 genes )	0.02770 ( 942 of 34011 annotated genes )	2.672e-07	0.0004756	Sec11a, Edem3, Psmb10, Psma4, Cul5, Ube2d3, Usp28, Uspl1, Cflar, Adam28, Sec11c, Usp37, Bat3, Usp24, Clpp, Solh, Mysm1, Usp7, Wac, Ep300, Stub1, Usp48, Ttc3, Fbxo45, Ubr5, Arih2, Taf1, Lnpep, Psmd8, Cyld, Klhl20, Nub1, Usp9x,
GO:0051251	positive regulation of ly	0.02948 ( 13 of 441 genes )	0.00491 ( 167 of 34011 annotated genes )	2.92e-07	0.0005197	Stat5b, Cd86, Ap3b1, Hspd1, Lck, Ccl5, Zap70, Itpkb, Ptprc, Nckap1l, Stat6, Hsp90aa1, Il12rb1,
GO:0023014	signal transduction via p	0.06576 ( 29 of 441 genes )	0.02279 ( 775 of 34011 annotated genes )	3.832e-07	0.000682	Stat5b, Ppm1a, Map4k4, Zc3hav1, Prkcb, Erc1, Ep300, Atp2c1, Nfkbid, Ikbke, Itpkb, Wnk1, Dapk1, Dusp10, Stk4, Sod1, Map3k5, Prkcd, Ikbkb, Pecam1, Lck, Rel, Ccl5, Pdpk1, Ptprc, Med1, Vegfa, Rictor, Pja2,
GO:0032879	regulation of localizatio	0.09297 ( 41 of 441 genes )	0.03960 ( 1347 of 34011 annotated genes )	3.919e-07	0.0006976	Stat5b, Pram1, Exoc2, Creb1, Prkcb, Gnas, Hsp90aa1, Clic1, Ppp1r12a, Tesc, Prkcd, Stxbp2, Tnnc1, Ikbkb, Pecam1, Trim27, Pdpk1, Add1, Rab14, Med1, Vegfa, Sp100, Cdkn1b, S1pr1, Ppp3ca, Syne1, Ibtk, Ep300, Rtn4, Wnk1, Gapvd1, Smad4, Dnajc1, Itpr1, Ubr5, Lck, Ccl5, Ptprc, Nckap1l, Vdac3, Cyld,
GO:0055086	nucleobase, nucleoside an	0.07029 ( 31 of 441 genes )	0.02555 ( 869 of 34011 annotated genes )	4.226e-07	0.0007522	Rhebl1, Rabgap1, Ino80, S1pr1, Gart, Zc3hav1, Atp2c1, Gnas, Rab21, Npr2, Nt5c3l, Hsp90aa1, Rab13, Rapgef2, Nt5c, Atp6v1c1, Snx9, Ncf2, Tnnc1, Ak3, Pde4b, Tuba4a, Nckap1l, Rab14, Fdx1, Glyr1, Ddx3x, Tbc1d10c, Snx13, Rictor, Helb,
GO:0045582	positive regulation of T	0.01814 ( 8 of 441 genes )	0.00159 ( 54 of 34011 annotated genes )	4.398e-07	0.0007829	Stat5b, Ptprc, Itpkb, Nckap1l, Ap3b1, Hsp90aa1, Lck, Zap70,
GO:0006461	protein complex assembly	0.06349 ( 28 of 441 genes )	0.02164 ( 736 of 34011 annotated genes )	4.399e-07	0.0007831	Ppm1a, Cdkn1b, Creb1, Ap2b1, Bclaf1, Stub1, Hcfc1, Hsp90aa1, Smad4, Prex1, Clip1, Rdx, Prkcd, Snx9, Ak3, Fkbp4, Crtc3, Trim27, Ccl5, Cep57, Clpp, Uqcrh, Add1, Tuba4a, Nckap1l, Vegfa, Ccdc88c, Rictor,
GO:0070271	protein complex biogenesi	0.06349 ( 28 of 441 genes )	0.02167 ( 737 of 34011 annotated genes )	4.52e-07	0.0008045	Ppm1a, Cdkn1b, Creb1, Ap2b1, Bclaf1, Stub1, Hcfc1, Hsp90aa1, Smad4, Prex1, Clip1, Rdx, Prkcd, Snx9, Ak3, Fkbp4, Crtc3, Trim27, Ccl5, Cep57, Clpp, Uqcrh, Add1, Tuba4a, Nckap1l, Vegfa, Ccdc88c, Rictor,
GO:0048731	system development	0.16100 ( 71 of 441 genes )	0.08850 ( 3010 of 34011 annotated genes )	4.761e-07	0.0008474	Stat5b, Cdk13, Prkcb, Clptm1, Nfkbid, Bcl11b, Hsp90aa1, Tesc, Mll5, Atg7, Stat6, Itk, Vezf1, Nfatc3, Ppp3ca, Mbnl1, Prkar1a, Rtn4, Ctla4, Smad4, Fbxo45, Runx1, Ccl5, Ptprc, Aimp2, Nckap1l, Reck, Rufy3, Creb1, Satb1, Foxp1, Tctn1, Gnas, Ptpn22, Ptpra, Cux1, Sod1, Stk4, Cd86, Prex1, Numb, Hdac4, Tnnc1, Bat3, Pdpk1, Bptf, Add1, Med1, Myst3, Vegfa, Cdkn1b, S1pr1, Mdm1, Tusc2, Syne1, Ap3b1, Ep300, Atp…
GO:0048513	organ development	0.12925 ( 57 of 441 genes )	0.06501 ( 2211 of 34011 annotated genes )	4.909e-07	0.0008739	Stat5b, Cdk13, Creb1, Satb1, Clptm1, Foxp1, Tctn1, Nfkbid, Gnas, Bcl11b, Ptpn22, Hsp90aa1, Cux1, Stk4, Sod1, Tesc, Numb, Hdac4, Tnnc1, Mll5, Bat3, Atg7, Pdpk1, Add1, Bptf, Stat6, Myst3, Med1, Itk, Vegfa, Nfatc3, S1pr1, Cdkn1b, Mdm1, Tusc2, Ppp3ca, Ap3b1, Mbnl1, Atp2c1, Ep300, Prkar1a, Itpkb, Rtn4, Ctla4, Smad4, Arih2, Runx1, Dicer1, Fkbp4, Lck, Ccl5, Zap70, Meis1, Ptprc, Aimp2, Ncoa3, Nckap1l,
GO:0006457	protein folding	0.02721 ( 12 of 441 genes )	0.00432 ( 147 of 34011 annotated genes )	5.016e-07	0.0008929	Fkbp4, Dnajc11, Hspd1, Stub1, Nktr, Tcp1, Dnajc8, Hsp90aa1, Ranbp2, Dnajc1, Ppig, Hspe1,
GO:0043065	positive regulation of ap	0.05215 ( 23 of 441 genes )	0.01564 ( 532 of 34011 annotated genes )	5.55e-07	0.0009878	Stat5b, Cdkn1b, Bclaf1, Ep300, Usp28, Nfkbid, Ikbke, Ctla4, Dapk1, Trpm7, Stk4, Ing4, Map3k5, Prkcd, Ncf2, Bat3, Hspd1, Lck, Ccl5, Ptprc, Rbm5, Cyld, Usp7,
